# Supplementary material
Source: publisher figshare collection journal article supplement (https://springernature.figshare.com/ndownloader/files/35041376)
Supplement: Supplementary file 1 [file 35041376]

Archive with 141 entries (141 files):
- CytoscapeSession-2021_06_28-02_05/3.0.0.version
- CytoscapeSession-2021_06_28-02_05/networks/82099-lung_GRN4TCGA_LUAD.txt_2.xgmml
- CytoscapeSession-2021_06_28-02_05/networks/35-lung_GRN4TCGA_normal.txt.xgmml
- CytoscapeSession-2021_06_28-02_05/networks/82198-lung_GRN4TCGA_LUSC.txt_2.xgmml
- CytoscapeSession-2021_06_28-02_05/networks/77-77.xgmml
- CytoscapeSession-2021_06_28-02_05/networks/66396-lung_GRN4GTEx_normal.txt.xgmml
- CytoscapeSession-2021_06_28-02_05/views/61-83391-lung_GRN4TCGA_normal.txt.xgmml
- CytoscapeSession-2021_06_28-02_05/views/66422-84503-lung_GRN4GTEx_normal.txt.xgmml
- CytoscapeSession-2021_06_28-02_05/views/82125-83398-lung_GRN4TCGA_LUAD.txt_2.xgmml
- CytoscapeSession-2021_06_28-02_05/views/82224-83462-lung_GRN4TCGA_LUSC.txt_2.xgmml
- CytoscapeSession-2021_06_28-02_05/tables/35-lung_GRN4TCGA_normal.txt/LOCAL_ATTRS-org.cytoscape.model.CyEdge-35+default+edge.cytable
- CytoscapeSession-2021_06_28-02_05/tables/82214-82214/HIDDEN-org.cytoscape.model.CyNetwork-82214+hidden+network.cytable
- CytoscapeSession-2021_06_28-02_05/tables/82115-82115/HIDDEN-org.cytoscape.model.CyNetwork-82115+hidden+network.cytable
- CytoscapeSession-2021_06_28-02_05/tables/61-lung_GRN4TCGA_normal.txt/HIDDEN-org.cytoscape.model.CyEdge-61+hidden+edge.cytable
- CytoscapeSession-2021_06_28-02_05/tables/82115-82115/LOCAL_ATTRS-org.cytoscape.model.CyNetwork-82115+default+network.cytable
- CytoscapeSession-2021_06_28-02_05/tables/global/83297-150+hidden+node.cytable
- CytoscapeSession-2021_06_28-02_05/tables/77-77/SHARED_ATTRS-org.cytoscape.model.CyEdge-77+shared+edge.cytable
- CytoscapeSession-2021_06_28-02_05/tables/66412-66412/HIDDEN-org.cytoscape.model.CyNode-66412+hidden+node.cytable
- CytoscapeSession-2021_06_28-02_05/tables/82198-lung_GRN4TCGA_LUSC.txt_2/LOCAL_ATTRS-org.cytoscape.model.CyEdge-82198+default+edge.cytable
- CytoscapeSession-2021_06_28-02_05/tables/103-lung_rmMT.paf%2Dth0.00%2Dp1e%2D3%2Drsqr0.30%2Dfiltered%2Dth_ranked.Tissue%2Dunique_class.csGCN.txt/HIDDEN-org.cytoscape.model.CyEdge-103+hidden+edge.cytable
- CytoscapeSession-2021_06_28-02_05/tables/35-lung_GRN4TCGA_normal.txt/SHARED_ATTRS-org.cytoscape.model.CyNode-35+shared+node.cytable
- CytoscapeSession-2021_06_28-02_05/tables/82125-lung_GRN4TCGA_LUAD.txt_2/LOCAL_ATTRS-org.cytoscape.model.CyEdge-lung_GRN4TCGA_LUAD.txt_2+default+edge.cytable
- CytoscapeSession-2021_06_28-02_05/tables/61-lung_GRN4TCGA_normal.txt/LOCAL_ATTRS-org.cytoscape.model.CyNode-lung_GRN4TCGA_normal.txt+default+node.cytable
- CytoscapeSession-2021_06_28-02_05/tables/66396-lung_GRN4GTEx_normal.txt/LOCAL_ATTRS-org.cytoscape.model.CyEdge-66396+default+edge.cytable
- CytoscapeSession-2021_06_28-02_05/tables/global/83380-150+hidden+network.cytable
- CytoscapeSession-2021_06_28-02_05/tables/77-77/LOCAL_ATTRS-org.cytoscape.model.CyNetwork-77+default+network.cytable
- CytoscapeSession-2021_06_28-02_05/tables/66412-66412/LOCAL_ATTRS-org.cytoscape.model.CyEdge-66412+default+edge.cytable
- CytoscapeSession-2021_06_28-02_05/tables/82198-lung_GRN4TCGA_LUSC.txt_2/HIDDEN-org.cytoscape.model.CyEdge-82198+hidden+edge.cytable
- CytoscapeSession-2021_06_28-02_05/tables/82214-82214/LOCAL_ATTRS-org.cytoscape.model.CyEdge-82214+default+edge.cytable
- CytoscapeSession-2021_06_28-02_05/tables/82125-lung_GRN4TCGA_LUAD.txt_2/LOCAL_ATTRS-org.cytoscape.model.CyNetwork-lung_GRN4TCGA_LUAD.txt_2+default+network.cytable
- CytoscapeSession-2021_06_28-02_05/tables/61-lung_GRN4TCGA_normal.txt/LOCAL_ATTRS-org.cytoscape.model.CyEdge-lung_GRN4TCGA_normal.txt+default+edge.cytable
- CytoscapeSession-2021_06_28-02_05/tables/global/83294-51+default+edge.cytable
- CytoscapeSession-2021_06_28-02_05/tables/66412-66412/LOCAL_ATTRS-org.cytoscape.model.CyNetwork-66412+default+network.cytable
- CytoscapeSession-2021_06_28-02_05/tables/82115-82115/HIDDEN-org.cytoscape.model.CyNode-82115+hidden+node.cytable
- CytoscapeSession-2021_06_28-02_05/tables/51-51/HIDDEN-org.cytoscape.model.CyNode-51+hidden+node.cytable
- CytoscapeSession-2021_06_28-02_05/tables/77-77/HIDDEN-org.cytoscape.model.CyEdge-77+hidden+edge.cytable
- CytoscapeSession-2021_06_28-02_05/tables/82214-82214/LOCAL_ATTRS-org.cytoscape.model.CyNetwork-82214+default+network.cytable
- CytoscapeSession-2021_06_28-02_05/tables/66422-lung_GRN4GTEx_normal.txt/LOCAL_ATTRS-org.cytoscape.model.CyEdge-lung_GRN4GTEx_normal.txt+default+edge.cytable
- CytoscapeSession-2021_06_28-02_05/tables/61-lung_GRN4TCGA_normal.txt/HIDDEN-org.cytoscape.model.CyNode-61+hidden+node.cytable
- CytoscapeSession-2021_06_28-02_05/tables/93-93/HIDDEN-org.cytoscape.model.CyEdge-93+hidden+edge.cytable
- CytoscapeSession-2021_06_28-02_05/tables/global/83323-51+hidden+node.cytable
- CytoscapeSession-2021_06_28-02_05/tables/82125-lung_GRN4TCGA_LUAD.txt_2/LOCAL_ATTRS-org.cytoscape.model.CyNode-lung_GRN4TCGA_LUAD.txt_2+default+node.cytable
- CytoscapeSession-2021_06_28-02_05/tables/66412-66412/HIDDEN-org.cytoscape.model.CyEdge-66412+hidden+edge.cytable
- CytoscapeSession-2021_06_28-02_05/tables/77-77/SHARED_ATTRS-org.cytoscape.model.CyNetwork-77+shared+network.cytable
- CytoscapeSession-2021_06_28-02_05/tables/51-51/LOCAL_ATTRS-org.cytoscape.model.CyNode-51+default+node.cytable
- CytoscapeSession-2021_06_28-02_05/tables/82115-82115/LOCAL_ATTRS-org.cytoscape.model.CyEdge-82115+default+edge.cytable
- CytoscapeSession-2021_06_28-02_05/tables/82099-lung_GRN4TCGA_LUAD.txt_2/SHARED_ATTRS-org.cytoscape.model.CyNetwork-82099+shared+network.cytable
- CytoscapeSession-2021_06_28-02_05/tables/93-93/LOCAL_ATTRS-org.cytoscape.model.CyNetwork-93+default+network.cytable
- CytoscapeSession-2021_06_28-02_05/tables/82224-lung_GRN4TCGA_LUSC.txt_2/HIDDEN-org.cytoscape.model.CyEdge-82224+hidden+edge.cytable
- CytoscapeSession-2021_06_28-02_05/tables/82099-lung_GRN4TCGA_LUAD.txt_2/HIDDEN-org.cytoscape.model.CyNetwork-82099+hidden+network.cytable
- CytoscapeSession-2021_06_28-02_05/tables/82099-lung_GRN4TCGA_LUAD.txt_2/HIDDEN-org.cytoscape.model.CyEdge-82099+hidden+edge.cytable
- CytoscapeSession-2021_06_28-02_05/tables/global/83367-51+hidden+edge.cytable
- CytoscapeSession-2021_06_28-02_05/tables/82125-lung_GRN4TCGA_LUAD.txt_2/HIDDEN-org.cytoscape.model.CyEdge-82125+hidden+edge.cytable
- CytoscapeSession-2021_06_28-02_05/tables/77-77/LOCAL_ATTRS-org.cytoscape.model.CyNode-77+default+node.cytable
- CytoscapeSession-2021_06_28-02_05/tables/82099-lung_GRN4TCGA_LUAD.txt_2/SHARED_ATTRS-org.cytoscape.model.CyNode-82099+shared+node.cytable
- CytoscapeSession-2021_06_28-02_05/tables/82198-lung_GRN4TCGA_LUSC.txt_2/SHARED_ATTRS-org.cytoscape.model.CyNetwork-82198+shared+network.cytable
- CytoscapeSession-2021_06_28-02_05/tables/35-lung_GRN4TCGA_normal.txt/HIDDEN-org.cytoscape.model.CyEdge-35+hidden+edge.cytable
- CytoscapeSession-2021_06_28-02_05/tables/82224-lung_GRN4TCGA_LUSC.txt_2/LOCAL_ATTRS-org.cytoscape.model.CyNetwork-lung_GRN4TCGA_LUSC.txt_2+default+network.cytable
- CytoscapeSession-2021_06_28-02_05/tables/82198-lung_GRN4TCGA_LUSC.txt_2/SHARED_ATTRS-org.cytoscape.model.CyNode-82198+shared+node.cytable
- CytoscapeSession-2021_06_28-02_05/tables/66396-lung_GRN4GTEx_normal.txt/HIDDEN-org.cytoscape.model.CyNetwork-66396+hidden+network.cytable
- CytoscapeSession-2021_06_28-02_05/tables/82198-lung_GRN4TCGA_LUSC.txt_2/SHARED_ATTRS-org.cytoscape.model.CyEdge-82198+shared+edge.cytable
- CytoscapeSession-2021_06_28-02_05/tables/61-lung_GRN4TCGA_normal.txt/LOCAL_ATTRS-org.cytoscape.model.CyNetwork-lung_GRN4TCGA_normal.txt+default+network.cytable
- CytoscapeSession-2021_06_28-02_05/tables/93-93/HIDDEN-org.cytoscape.model.CyNode-93+hidden+node.cytable
- CytoscapeSession-2021_06_28-02_05/tables/82198-lung_GRN4TCGA_LUSC.txt_2/LOCAL_ATTRS-org.cytoscape.model.CyNode-82198+default+node.cytable
- CytoscapeSession-2021_06_28-02_05/tables/82125-lung_GRN4TCGA_LUAD.txt_2/HIDDEN-org.cytoscape.model.CyNode-82125+hidden+node.cytable
- CytoscapeSession-2021_06_28-02_05/tables/global/83342-150+default+edge.cytable
- CytoscapeSession-2021_06_28-02_05/tables/93-93/LOCAL_ATTRS-org.cytoscape.model.CyEdge-93+default+edge.cytable
- CytoscapeSession-2021_06_28-02_05/tables/82099-lung_GRN4TCGA_LUAD.txt_2/LOCAL_ATTRS-org.cytoscape.model.CyEdge-82099+default+edge.cytable
- CytoscapeSession-2021_06_28-02_05/tables/93-93/LOCAL_ATTRS-org.cytoscape.model.CyNode-93+default+node.cytable
- CytoscapeSession-2021_06_28-02_05/tables/82224-lung_GRN4TCGA_LUSC.txt_2/HIDDEN-org.cytoscape.model.CyNode-82224+hidden+node.cytable
- CytoscapeSession-2021_06_28-02_05/tables/66422-lung_GRN4GTEx_normal.txt/HIDDEN-org.cytoscape.model.CyEdge-66422+hidden+edge.cytable
- CytoscapeSession-2021_06_28-02_05/tables/61-lung_GRN4TCGA_normal.txt/HIDDEN-org.cytoscape.model.CyNetwork-61+hidden+network.cytable
- CytoscapeSession-2021_06_28-02_05/tables/66396-lung_GRN4GTEx_normal.txt/SHARED_ATTRS-org.cytoscape.model.CyNode-66396+shared+node.cytable
- CytoscapeSession-2021_06_28-02_05/tables/66396-lung_GRN4GTEx_normal.txt/LOCAL_ATTRS-org.cytoscape.model.CyNetwork-66396+default+network.cytable
- CytoscapeSession-2021_06_28-02_05/tables/82198-lung_GRN4TCGA_LUSC.txt_2/HIDDEN-org.cytoscape.model.CyNetwork-82198+hidden+network.cytable
- CytoscapeSession-2021_06_28-02_05/tables/82224-lung_GRN4TCGA_LUSC.txt_2/LOCAL_ATTRS-org.cytoscape.model.CyNode-lung_GRN4TCGA_LUSC.txt_2+default+node.cytable
- CytoscapeSession-2021_06_28-02_05/tables/103-lung_rmMT.paf%2Dth0.00%2Dp1e%2D3%2Drsqr0.30%2Dfiltered%2Dth_ranked.Tissue%2Dunique_class.csGCN.txt/LOCAL_ATTRS-org.cytoscape.model.CyEdge-103+default+edge.cytable
- CytoscapeSession-2021_06_28-02_05/tables/66412-66412/LOCAL_ATTRS-org.cytoscape.model.CyNode-66412+default+node.cytable
- CytoscapeSession-2021_06_28-02_05/tables/66396-lung_GRN4GTEx_normal.txt/SHARED_ATTRS-org.cytoscape.model.CyEdge-66396+shared+edge.cytable
- CytoscapeSession-2021_06_28-02_05/tables/77-77/HIDDEN-org.cytoscape.model.CyNetwork-77+hidden+network.cytable
- CytoscapeSession-2021_06_28-02_05/tables/global/83378-51+hidden+network.cytable
- CytoscapeSession-2021_06_28-02_05/tables/global/83359-150+default+network.cytable
- CytoscapeSession-2021_06_28-02_05/tables/66422-lung_GRN4GTEx_normal.txt/HIDDEN-org.cytoscape.model.CyNode-66422+hidden+node.cytable
- CytoscapeSession-2021_06_28-02_05/tables/77-77/HIDDEN-org.cytoscape.model.CyNode-77+hidden+node.cytable
- CytoscapeSession-2021_06_28-02_05/tables/82125-lung_GRN4TCGA_LUAD.txt_2/HIDDEN-org.cytoscape.model.CyNetwork-82125+hidden+network.cytable
- CytoscapeSession-2021_06_28-02_05/tables/77-77/SHARED_ATTRS-org.cytoscape.model.CyNode-77+shared+node.cytable
- CytoscapeSession-2021_06_28-02_05/tables/82198-lung_GRN4TCGA_LUSC.txt_2/HIDDEN-org.cytoscape.model.CyNode-82198+hidden+node.cytable
- CytoscapeSession-2021_06_28-02_05/tables/35-lung_GRN4TCGA_normal.txt/HIDDEN-org.cytoscape.model.CyNetwork-35+hidden+network.cytable
- CytoscapeSession-2021_06_28-02_05/tables/82214-82214/HIDDEN-org.cytoscape.model.CyNode-82214+hidden+node.cytable
- CytoscapeSession-2021_06_28-02_05/tables/82099-lung_GRN4TCGA_LUAD.txt_2/HIDDEN-org.cytoscape.model.CyNode-82099+hidden+node.cytable
- CytoscapeSession-2021_06_28-02_05/tables/66396-lung_GRN4GTEx_normal.txt/LOCAL_ATTRS-org.cytoscape.model.CyNode-66396+default+node.cytable
- CytoscapeSession-2021_06_28-02_05/tables/66412-66412/HIDDEN-org.cytoscape.model.CyNetwork-66412+hidden+network.cytable
- CytoscapeSession-2021_06_28-02_05/tables/103-lung_rmMT.paf%2Dth0.00%2Dp1e%2D3%2Drsqr0.30%2Dfiltered%2Dth_ranked.Tissue%2Dunique_class.csGCN.txt/HIDDEN-org.cytoscape.model.CyNetwork-103+hidden+network.cytable
- CytoscapeSession-2021_06_28-02_05/tables/global/83341-150+hidden+edge.cytable
- CytoscapeSession-2021_06_28-02_05/tables/51-51/LOCAL_ATTRS-org.cytoscape.model.CyEdge-51+default+edge.cytable
- CytoscapeSession-2021_06_28-02_05/tables/66396-lung_GRN4GTEx_normal.txt/HIDDEN-org.cytoscape.model.CyNode-66396+hidden+node.cytable
- CytoscapeSession-2021_06_28-02_05/tables/global/83300-51+default+node.cytable
- CytoscapeSession-2021_06_28-02_05/tables/82214-82214/LOCAL_ATTRS-org.cytoscape.model.CyNode-82214+default+node.cytable
- CytoscapeSession-2021_06_28-02_05/tables/82198-lung_GRN4TCGA_LUSC.txt_2/LOCAL_ATTRS-org.cytoscape.model.CyNetwork-82198+default+network.cytable
- CytoscapeSession-2021_06_28-02_05/tables/66422-lung_GRN4GTEx_normal.txt/LOCAL_ATTRS-org.cytoscape.model.CyNetwork-lung_GRN4GTEx_normal.txt+default+network.cytable
- CytoscapeSession-2021_06_28-02_05/tables/35-lung_GRN4TCGA_normal.txt/SHARED_ATTRS-org.cytoscape.model.CyEdge-35+shared+edge.cytable
- CytoscapeSession-2021_06_28-02_05/tables/103-lung_rmMT.paf%2Dth0.00%2Dp1e%2D3%2Drsqr0.30%2Dfiltered%2Dth_ranked.Tissue%2Dunique_class.csGCN.txt/LOCAL_ATTRS-org.cytoscape.model.CyNetwork-103+default+network.cytable
- CytoscapeSession-2021_06_28-02_05/tables/global/83371-51+default+network.cytable
- CytoscapeSession-2021_06_28-02_05/tables/35-lung_GRN4TCGA_normal.txt/LOCAL_ATTRS-org.cytoscape.model.CyNode-35+default+node.cytable
- CytoscapeSession-2021_06_28-02_05/tables/82099-lung_GRN4TCGA_LUAD.txt_2/LOCAL_ATTRS-org.cytoscape.model.CyNode-82099+default+node.cytable
- CytoscapeSession-2021_06_28-02_05/tables/82214-82214/HIDDEN-org.cytoscape.model.CyEdge-82214+hidden+edge.cytable
- CytoscapeSession-2021_06_28-02_05/tables/66422-lung_GRN4GTEx_normal.txt/HIDDEN-org.cytoscape.model.CyNetwork-66422+hidden+network.cytable
- CytoscapeSession-2021_06_28-02_05/tables/66422-lung_GRN4GTEx_normal.txt/LOCAL_ATTRS-org.cytoscape.model.CyNode-lung_GRN4GTEx_normal.txt+default+node.cytable
- CytoscapeSession-2021_06_28-02_05/tables/66396-lung_GRN4GTEx_normal.txt/HIDDEN-org.cytoscape.model.CyEdge-66396+hidden+edge.cytable
- CytoscapeSession-2021_06_28-02_05/tables/35-lung_GRN4TCGA_normal.txt/SHARED_ATTRS-org.cytoscape.model.CyNetwork-35+shared+network.cytable
- CytoscapeSession-2021_06_28-02_05/tables/82224-lung_GRN4TCGA_LUSC.txt_2/LOCAL_ATTRS-org.cytoscape.model.CyEdge-lung_GRN4TCGA_LUSC.txt_2+default+edge.cytable
- CytoscapeSession-2021_06_28-02_05/tables/103-lung_rmMT.paf%2Dth0.00%2Dp1e%2D3%2Drsqr0.30%2Dfiltered%2Dth_ranked.Tissue%2Dunique_class.csGCN.txt/HIDDEN-org.cytoscape.model.CyNode-103+hidden+node.cytable
- CytoscapeSession-2021_06_28-02_05/tables/103-lung_rmMT.paf%2Dth0.00%2Dp1e%2D3%2Drsqr0.30%2Dfiltered%2Dth_ranked.Tissue%2Dunique_class.csGCN.txt/LOCAL_ATTRS-org.cytoscape.model.CyNode-103+default+node.cytable
- CytoscapeSession-2021_06_28-02_05/tables/51-51/HIDDEN-org.cytoscape.model.CyEdge-51+hidden+edge.cytable
- CytoscapeSession-2021_06_28-02_05/tables/35-lung_GRN4TCGA_normal.txt/LOCAL_ATTRS-org.cytoscape.model.CyNetwork-35+default+network.cytable
- CytoscapeSession-2021_06_28-02_05/tables/51-51/HIDDEN-org.cytoscape.model.CyNetwork-51+hidden+network.cytable
- CytoscapeSession-2021_06_28-02_05/tables/93-93/HIDDEN-org.cytoscape.model.CyNetwork-93+hidden+network.cytable
- CytoscapeSession-2021_06_28-02_05/tables/51-51/LOCAL_ATTRS-org.cytoscape.model.CyNetwork-51+default+network.cytable
- CytoscapeSession-2021_06_28-02_05/tables/82099-lung_GRN4TCGA_LUAD.txt_2/LOCAL_ATTRS-org.cytoscape.model.CyNetwork-82099+default+network.cytable
- CytoscapeSession-2021_06_28-02_05/tables/77-77/LOCAL_ATTRS-org.cytoscape.model.CyEdge-77+default+edge.cytable
- CytoscapeSession-2021_06_28-02_05/tables/66396-lung_GRN4GTEx_normal.txt/SHARED_ATTRS-org.cytoscape.model.CyNetwork-66396+shared+network.cytable
- CytoscapeSession-2021_06_28-02_05/tables/global/83321-150+default+node.cytable
- CytoscapeSession-2021_06_28-02_05/tables/82099-lung_GRN4TCGA_LUAD.txt_2/SHARED_ATTRS-org.cytoscape.model.CyEdge-82099+shared+edge.cytable
- CytoscapeSession-2021_06_28-02_05/tables/82115-82115/HIDDEN-org.cytoscape.model.CyEdge-82115+hidden+edge.cytable
- CytoscapeSession-2021_06_28-02_05/tables/35-lung_GRN4TCGA_normal.txt/HIDDEN-org.cytoscape.model.CyNode-35+hidden+node.cytable
- CytoscapeSession-2021_06_28-02_05/tables/82224-lung_GRN4TCGA_LUSC.txt_2/HIDDEN-org.cytoscape.model.CyNetwork-82224+hidden+network.cytable
- CytoscapeSession-2021_06_28-02_05/tables/82115-82115/LOCAL_ATTRS-org.cytoscape.model.CyNode-82115+default+node.cytable
- CytoscapeSession-2021_06_28-02_05/tables/cytables.xml
- CytoscapeSession-2021_06_28-02_05/session_vizmap.xml
- CytoscapeSession-2021_06_28-02_05/properties/groupSettings.props
- CytoscapeSession-2021_06_28-02_05/properties/session_bookmarks.xml
- CytoscapeSession-2021_06_28-02_05/session_thumbnail.png
- CytoscapeSession-2021_06_28-02_05/apps/org.cytoscape.ding.customgraphicsmgr/image_metadata.props
- CytoscapeSession-2021_06_28-02_05/apps/org.cytoscape.swing-application/session_state.xml
- CytoscapeSession-2021_06_28-02_05/apps/org.cytoscape.swing-application/network_list.xml
- CytoscapeSession-2021_06_28-02_05/apps/org.cytoscape.filter/filters.json
- CytoscapeSession-2021_06_28-02_05/apps/org.cytoscape.filter/filterChains.json
- CytoscapeSession-2021_06_28-02_05/apps/org.cytoscape.browser/UnassignedTables.props
- CytoscapeSession-2021_06_28-02_05/apps/org.cytoscape.browser/EdgeTable.props
- CytoscapeSession-2021_06_28-02_05/apps/org.cytoscape.browser/NodeTable.props
- CytoscapeSession-2021_06_28-02_05/apps/org.cytoscape.browser/NetworkTable.props
