# Supplementary material
Source: publisher figshare collection journal article supplement (https://springernature.figshare.com/ndownloader/files/35041376)
Supplement: Supplementary file 1 [file 35041376 › CytoscapeSession-2021_06_28-02_05/apps/org.cytoscape.browser/EdgeTable.props]

lung_GRN4TCGA_normal.txt default edge	0	SUID	false
lung_GRN4TCGA_normal.txt default edge	1	selected	false
lung_GRN4TCGA_normal.txt default edge	2	shared name	true
lung_GRN4TCGA_normal.txt default edge	3	shared interaction	true
lung_GRN4TCGA_normal.txt default edge	4	name	true
lung_GRN4TCGA_normal.txt default edge	5	interaction	true
lung_GRN4GTEx_normal.txt default edge	0	SUID	false
lung_GRN4GTEx_normal.txt default edge	1	selected	false
lung_GRN4GTEx_normal.txt default edge	2	shared name	true
lung_GRN4GTEx_normal.txt default edge	3	shared interaction	true
lung_GRN4GTEx_normal.txt default edge	4	name	true
lung_GRN4GTEx_normal.txt default edge	5	interaction	true
lung_GRN4TCGA_LUAD.txt_2 default edge	0	SUID	false
lung_GRN4TCGA_LUAD.txt_2 default edge	1	selected	false
lung_GRN4TCGA_LUAD.txt_2 default edge	2	shared name	true
lung_GRN4TCGA_LUAD.txt_2 default edge	3	shared interaction	true
lung_GRN4TCGA_LUAD.txt_2 default edge	4	name	true
lung_GRN4TCGA_LUAD.txt_2 default edge	5	interaction	true
lung_GRN4TCGA_LUAD.txt_2 default edge	6	Ratio_sig	true
lung_GRN4TCGA_LUSC.txt_2 default edge	0	SUID	false
lung_GRN4TCGA_LUSC.txt_2 default edge	1	selected	false
lung_GRN4TCGA_LUSC.txt_2 default edge	2	shared name	true
lung_GRN4TCGA_LUSC.txt_2 default edge	3	shared interaction	true
lung_GRN4TCGA_LUSC.txt_2 default edge	4	name	true
lung_GRN4TCGA_LUSC.txt_2 default edge	5	interaction	true
lung_GRN4TCGA_LUSC.txt_2 default edge	6	ratio_sig	true
