# Supplementary material
Source: publisher figshare collection journal article supplement (https://springernature.figshare.com/ndownloader/files/35041376)
Supplement: Supplementary file 1 [file 35041376 › CytoscapeSession-2021_06_28-02_05/apps/org.cytoscape.browser/NetworkTable.props]

lung_GRN4GTEx_normal.txt default network	0	SUID	false
lung_GRN4GTEx_normal.txt default network	1	selected	false
lung_GRN4GTEx_normal.txt default network	2	shared name	true
lung_GRN4GTEx_normal.txt default network	3	name	true
lung_GRN4GTEx_normal.txt default network	4	__Annotations	true
lung_GRN4TCGA_LUAD.txt_2 default network	0	SUID	false
lung_GRN4TCGA_LUAD.txt_2 default network	1	selected	false
lung_GRN4TCGA_LUAD.txt_2 default network	2	shared name	true
lung_GRN4TCGA_LUAD.txt_2 default network	3	name	true
lung_GRN4TCGA_LUAD.txt_2 default network	4	__Annotations	true
lung_GRN4TCGA_LUSC.txt_2 default network	0	SUID	false
lung_GRN4TCGA_LUSC.txt_2 default network	1	selected	false
lung_GRN4TCGA_LUSC.txt_2 default network	2	shared name	true
lung_GRN4TCGA_LUSC.txt_2 default network	3	name	true
lung_GRN4TCGA_LUSC.txt_2 default network	4	__Annotations	true
lung_GRN4TCGA_normal.txt default network	0	SUID	false
lung_GRN4TCGA_normal.txt default network	1	selected	false
lung_GRN4TCGA_normal.txt default network	2	shared name	true
lung_GRN4TCGA_normal.txt default network	3	name	true
lung_GRN4TCGA_normal.txt default network	4	__Annotations	true
