# Supplementary material
Source: publisher figshare collection journal article supplement (https://springernature.figshare.com/ndownloader/files/35041376)
Supplement: Supplementary file 1 [file 35041376 › CytoscapeSession-2021_06_28-02_05/apps/org.cytoscape.browser/NodeTable.props]

lung_GRN4TCGA_LUSC.txt_2 default node	0	SUID	false
lung_GRN4TCGA_LUSC.txt_2 default node	1	selected	false
lung_GRN4TCGA_LUSC.txt_2 default node	2	shared name	true
lung_GRN4TCGA_LUSC.txt_2 default node	3	name	true
lung_GRN4TCGA_LUSC.txt_2 default node	4	DEG	true
lung_GRN4TCGA_LUSC.txt_2 default node	5	Type	true
lung_GRN4TCGA_LUSC.txt_2 default node	6	UP/DOWN in LUAD	true
lung_GRN4GTEx_normal.txt default node	0	SUID	false
lung_GRN4GTEx_normal.txt default node	1	selected	false
lung_GRN4GTEx_normal.txt default node	2	shared name	true
lung_GRN4GTEx_normal.txt default node	3	name	true
lung_GRN4GTEx_normal.txt default node	4	Type	true
lung_GRN4TCGA_LUAD.txt_2 default node	0	SUID	false
lung_GRN4TCGA_LUAD.txt_2 default node	1	selected	false
lung_GRN4TCGA_LUAD.txt_2 default node	2	shared name	true
lung_GRN4TCGA_LUAD.txt_2 default node	3	name	true
lung_GRN4TCGA_LUAD.txt_2 default node	4	Type	true
lung_GRN4TCGA_LUAD.txt_2 default node	5	DEG	true
lung_GRN4TCGA_LUAD.txt_2 default node	6	UP/DOWN in LUAD	true
lung_GRN4TCGA_LUAD.txt_2 default node	7	Column 6	true
lung_GRN4TCGA_LUAD.txt_2 default node	8	Column 7	true
lung_GRN4TCGA_LUAD.txt_2 default node	9	Column 8	true
lung_GRN4TCGA_normal.txt default node	0	SUID	false
lung_GRN4TCGA_normal.txt default node	1	selected	false
lung_GRN4TCGA_normal.txt default node	2	shared name	true
lung_GRN4TCGA_normal.txt default node	3	name	true
lung_GRN4TCGA_normal.txt default node	4	Type	true
