# Supplementary material
Source: publisher figshare collection journal article supplement (https://springernature.figshare.com/ndownloader/files/35041376)
Supplement: Supplementary file 1 [file 35041376 › CytoscapeSession-2021_06_28-02_05/apps/org.cytoscape.swing-application/session_state.xml]

<?xml version="1.0" encoding="UTF-8" standalone="yes"?>
<sessionState documentVersion="1.1">
    <cytopanels>
        <cytopanel id="CytoPanel1">
            <panelState>DOCK</panelState>
            <panelStateInternal>UNDOCK</panelStateInternal>
            <selectedPanel>0</selectedPanel>
        </cytopanel>
        <cytopanel id="CytoPanel2">
            <panelState>DOCK</panelState>
            <panelStateInternal>DOCK</panelStateInternal>
            <selectedPanel>0</selectedPanel>
        </cytopanel>
        <cytopanel id="CytoPanel3">
            <panelState>HIDE</panelState>
            <panelStateInternal>DOCK</panelStateInternal>
            <selectedPanel>-1</selectedPanel>
        </cytopanel>
    </cytopanels>
</sessionState>
