# Supplementary material
Source: publisher figshare collection journal article supplement (https://springernature.figshare.com/ndownloader/files/35041376)
Supplement: Supplementary file 1 [file 35041376 › CytoscapeSession-2021_06_28-02_05/networks/35-lung_GRN4TCGA_normal.txt.xgmml]

<?xml version="1.0" encoding="UTF-8" standalone="yes"?>
<graph id="35" label="lung_GRN4TCGA_normal.txt" cy:view="0" cy:registered="0" cy:documentVersion="3.0" xmlns:dc="http://purl.org/dc/elements/1.1/" xmlns:xlink="http://www.w3.org/1999/xlink" xmlns:rdf="http://www.w3.org/1999/02/22-rdf-syntax-ns#" xmlns:cy="http://www.cytoscape.org" xmlns="http://www.cs.rpi.edu/XGMML">
  <att>
    <graph id="51" label="51" cy:registered="0">
    </graph>
  </att>
  <att>
    <graph id="61" label="lung_GRN4TCGA_normal.txt" cy:registered="1">
      <node id="73" label="LGI3"/>
      <node id="72" label="SLC34A2"/>
      <node id="71" label="ZBTB33"/>
      <edge id="76" label="SLC34A2 (GCN) LGI3" source="72" target="73" cy:directed="1"/>
      <edge id="75" label="ZBTB33 (GRN) LGI3" source="71" target="73" cy:directed="1"/>
      <edge id="74" label="ZBTB33 (GRN) SLC34A2" source="71" target="72" cy:directed="1"/>
    </graph>
  </att>
</graph>
