# Supplementary material
Source: publisher figshare collection journal article supplement (https://springernature.figshare.com/ndownloader/files/35041376)
Supplement: Supplementary file 1 [file 35041376 › CytoscapeSession-2021_06_28-02_05/networks/77-77.xgmml]

<?xml version="1.0" encoding="UTF-8" standalone="yes"?>
<graph id="77" label="77" cy:view="0" cy:registered="0" cy:documentVersion="3.0" xmlns:dc="http://purl.org/dc/elements/1.1/" xmlns:xlink="http://www.w3.org/1999/xlink" xmlns:rdf="http://www.w3.org/1999/02/22-rdf-syntax-ns#" xmlns:cy="http://www.cytoscape.org" xmlns="http://www.cs.rpi.edu/XGMML">
  <att>
    <graph id="93" label="93" cy:registered="0">
    </graph>
  </att>
  <att>
    <graph id="103" label="lung_rmMT.paf-th0.00-p1e-3-rsqr0.30-filtered-th_ranked.Tissue-unique_class.csGCN.txt" cy:registered="0">
      <node id="7980" label="XAGE2"/>
      <node id="7979" label="XAGE2B"/>
      <node id="7978" label="GLIPR2"/>
      <node id="7977" label="OSM"/>
      <node id="7976" label="COX8C"/>
      <node id="7975" label="AC087645.1"/>
      <node id="7974" label="XAGE1B"/>
      <node id="7973" label="XAGE1D"/>
      <node id="7972" label="RP11-114H20.1"/>
      <node id="7971" label="RP11-363G10.2"/>
      <node id="7970" label="XAGE1E"/>
      <node id="7969" label="XAGE1C"/>
      <node id="7968" label="SPANXA2"/>
      <node id="7967" label="SPANXA1"/>
      <node id="7966" label="C2"/>
      <node id="7965" label="LRRK2"/>
      <node id="7964" label="AC112715.2"/>
      <node id="7963" label="AC013449.1"/>
      <node id="7962" label="CD93"/>
      <node id="7961" label="SOX7"/>
      <node id="7960" label="HNF1B"/>
      <node id="7959" label="SFTA3"/>
      <node id="7958" label="VCY1B"/>
      <node id="7957" label="VCY"/>
      <node id="7956" label="VSIG2"/>
      <node id="7955" label="NKX2-1"/>
      <node id="7954" label="CACNA2D2"/>
      <node id="7953" label="RAP1GAP"/>
      <node id="7952" label="TP73"/>
      <node id="7951" label="ZMYND10"/>
      <node id="7950" label="PIP5K1B"/>
      <node id="7949" label="SNX25"/>
      <node id="7948" label="CSTL1"/>
      <node id="7947" label="C1orf234"/>
      <node id="7946" label="AC138517.1"/>
      <node id="7945" label="KIAA1658"/>
      <node id="7944" label="RP1-139D8.6"/>
      <node id="7943" label="IFNL3"/>
      <node id="7942" label="HMHB1"/>
      <node id="7941" label="HIST1H2BB"/>
      <node id="7940" label="DUOX1"/>
      <node id="7939" label="MYH3"/>
      <node id="7938" label="LIMS2"/>
      <node id="7937" label="DNAH2"/>
      <node id="7936" label="FAM166B"/>
      <node id="7935" label="FEZ1"/>
      <node id="7934" label="AOC3"/>
      <node id="7933" label="UGT2A2"/>
      <node id="7932" label="IL25"/>
      <node id="7931" label="DUOXA1"/>
      <node id="7930" label="TPX2"/>
      <node id="7929" label="CCNB2"/>
      <node id="7928" label="CLEC14A"/>
      <node id="7927" label="PPAP2C"/>
      <node id="7926" label="C9orf116"/>
      <node id="7925" label="SFTPD"/>
      <node id="7924" label="SFTA2"/>
      <node id="7923" label="TCF21"/>
      <node id="7922" label="GPC3"/>
      <node id="7921" label="CEP55"/>
      <node id="7920" label="CDH5"/>
      <node id="7919" label="MCCC2"/>
      <node id="7918" label="RAI2"/>
      <node id="7917" label="GHR"/>
      <node id="7916" label="CDCA5"/>
      <node id="7915" label="GIMAP1"/>
      <node id="7914" label="CD2"/>
      <node id="7913" label="FGF2"/>
      <node id="7912" label="LAMP3"/>
      <node id="7911" label="DHCR24"/>
      <node id="7910" label="TSPY8"/>
      <node id="7909" label="TSPY6P"/>
      <node id="7908" label="WDR96"/>
      <node id="7907" label="GPR116"/>
      <node id="7906" label="AC026202.1"/>
      <node id="7905" label="TAS2R50"/>
      <node id="7904" label="MYCT1"/>
      <node id="7903" label="BEX2"/>
      <node id="7902" label="EFEMP2"/>
      <node id="7901" label="UBE2C"/>
      <node id="7900" label="RHOJ"/>
      <node id="7899" label="TIE1"/>
      <node id="7898" label="WDR66"/>
      <node id="7897" label="SPATA18"/>
      <node id="7896" label="KCNJ4"/>
      <node id="7895" label="SMCP"/>
      <node id="7894" label="KIF11"/>
      <node id="7893" label="FMO2"/>
      <node id="7892" label="SCNN1A"/>
      <node id="7891" label="GAGE12H"/>
      <node id="7890" label="GAGE12E"/>
      <node id="7889" label="DLGAP5"/>
      <node id="7888" label="KIF4A"/>
      <node id="7887" label="ECSCR"/>
      <node id="7886" label="TSPAN18"/>
      <node id="7885" label="TSPY10"/>
      <node id="7884" label="LPAR6"/>
      <node id="7883" label="FXYD1"/>
      <node id="7882" label="KIAA1324L"/>
      <node id="7881" label="CD101"/>
      <node id="7880" label="RALGPS2"/>
      <node id="7879" label="GPATCH11"/>
      <node id="7878" label="DACH1"/>
      <node id="7877" label="CLEC3B"/>
      <node id="7876" label="AL354898.1"/>
      <node id="7875" label="CTD-2535L24.2"/>
      <node id="7874" label="CELF2"/>
      <node id="7873" label="MYO1G"/>
      <node id="7872" label="HIST1H4B"/>
      <node id="7871" label="SPEF1"/>
      <node id="7870" label="DNAH10"/>
      <node id="7869" label="MS4A4A"/>
      <node id="7868" label="VSIG4"/>
      <node id="7867" label="ABCA8"/>
      <node id="7866" label="FGF19"/>
      <node id="7865" label="MAGEA10"/>
      <node id="7864" label="EPDR1"/>
      <node id="7863" label="RAMP3"/>
      <node id="7862" label="PTN"/>
      <node id="7861" label="BIRC5"/>
      <node id="7860" label="PARM1"/>
      <node id="7859" label="ZFY"/>
      <node id="7858" label="UTY"/>
      <node id="7857" label="MELK"/>
      <node id="7856" label="TOP2A"/>
      <node id="7855" label="MAOA"/>
      <node id="7854" label="INMT"/>
      <node id="7853" label="ESAM"/>
      <node id="7852" label="SLC46A3"/>
      <node id="7851" label="ARHGAP6"/>
      <node id="7850" label="TGFA"/>
      <node id="7849" label="LEPREL1"/>
      <node id="7848" label="ASPM"/>
      <node id="7847" label="TSPY1"/>
      <node id="7846" label="TSPY4"/>
      <node id="7845" label="TAL1"/>
      <node id="7844" label="ZNF428"/>
      <node id="7843" label="ABCA3"/>
      <node id="7842" label="CCM2L"/>
      <node id="7841" label="USHBP1"/>
      <node id="7840" label="PRSS33"/>
      <node id="7839" label="C9orf53"/>
      <node id="7838" label="SASH1"/>
      <node id="7837" label="NPM3"/>
      <node id="7836" label="ROPN1L"/>
      <node id="7835" label="ADAMTS8"/>
      <node id="7834" label="NTRK2"/>
      <node id="7833" label="TMEM189"/>
      <node id="7832" label="GIMAP6"/>
      <node id="7831" label="GNG2"/>
      <node id="7830" label="PTPN13"/>
      <node id="7829" label="RECQL4"/>
      <node id="7828" label="PTPN21"/>
      <node id="7827" label="BRI3"/>
      <node id="7826" label="ABCC5"/>
      <node id="7825" label="FANCD2OS"/>
      <node id="7824" label="AP000679.2"/>
      <node id="7823" label="RAPGEF4"/>
      <node id="7822" label="CDKN3"/>
      <node id="7821" label="CDH3"/>
      <node id="7820" label="PLLP"/>
      <node id="7819" label="LITAF"/>
      <node id="7818" label="SENP5"/>
      <node id="7817" label="WDR53"/>
      <node id="7816" label="RP1-32I10.10"/>
      <node id="7815" label="TCP10L2"/>
      <node id="7814" label="HTR3C"/>
      <node id="7813" label="FETUB"/>
      <node id="7812" label="TSPAN1"/>
      <node id="7811" label="RAD51"/>
      <node id="7810" label="SLC16A14"/>
      <node id="7809" label="NCAPH"/>
      <node id="7808" label="CHEK1"/>
      <node id="7807" label="GYLTL1B"/>
      <node id="7806" label="FAM105A"/>
      <node id="7805" label="KANK3"/>
      <node id="7804" label="KRBA1"/>
      <node id="7803" label="PLA2G1B"/>
      <node id="7802" label="ORC1"/>
      <node id="7801" label="CDC20"/>
      <node id="7800" label="VEPH1"/>
      <node id="7799" label="GNAI2"/>
      <node id="7798" label="NPIPB15"/>
      <node id="7797" label="SERPINB5"/>
      <node id="7796" label="MIP"/>
      <node id="7795" label="ACER1"/>
      <node id="7794" label="RPS6KA2"/>
      <node id="7793" label="SSX4B"/>
      <node id="7792" label="HTR6"/>
      <node id="7791" label="ALDH3B1"/>
      <node id="7790" label="SPI1"/>
      <node id="7789" label="CDCA8"/>
      <node id="7788" label="SEMA6D"/>
      <node id="7787" label="KDR"/>
      <node id="7786" label="LDB2"/>
      <node id="7785" label="HOXA4"/>
      <node id="7784" label="DMRT1"/>
      <node id="7783" label="MAGEA2"/>
      <node id="7782" label="PLAC9"/>
      <node id="7781" label="MYBL2"/>
      <node id="7780" label="MUC8"/>
      <node id="7779" label="IL36A"/>
      <node id="7778" label="TFDP1"/>
      <node id="7777" label="PRX"/>
      <node id="7776" label="MAGEA2B"/>
      <node id="7775" label="CYP3A4"/>
      <node id="7774" label="TMEM163"/>
      <node id="7773" label="SHE"/>
      <node id="7772" label="ESYT3"/>
      <node id="7771" label="MCM10"/>
      <node id="7770" label="S100A16"/>
      <node id="7769" label="SLC46A2"/>
      <node id="7768" label="PTTG1"/>
      <node id="7767" label="POU3F2"/>
      <node id="7766" label="MRGPRE"/>
      <node id="7765" label="CGNL1"/>
      <node id="7764" label="COL4A4"/>
      <node id="7763" label="TTC39A"/>
      <node id="7762" label="AC117834.1"/>
      <node id="7761" label="STATH"/>
      <node id="7760" label="SCIN"/>
      <node id="7759" label="NCAPG"/>
      <node id="7758" label="SEMA6A"/>
      <node id="7757" label="SPDYC"/>
      <node id="7756" label="CBLN2"/>
      <node id="7755" label="SPTBN1"/>
      <node id="7754" label="NMNAT3"/>
      <node id="7753" label="EPCAM"/>
      <node id="7752" label="FZD4"/>
      <node id="7751" label="ACTL6A"/>
      <node id="7750" label="FOXM1"/>
      <node id="7749" label="KCNK16"/>
      <node id="7748" label="TUBA3E"/>
      <node id="7747" label="LCE1F"/>
      <node id="7746" label="DACH2"/>
      <node id="7745" label="GABRA5"/>
      <node id="7744" label="SYNPO2"/>
      <node id="7743" label="TNS1"/>
      <node id="7742" label="ANLN"/>
      <node id="7741" label="SYT15"/>
      <node id="7740" label="LIPH"/>
      <node id="7739" label="HES1"/>
      <node id="7738" label="SQSTM1"/>
      <node id="7737" label="MYZAP"/>
      <node id="7736" label="PLD5"/>
      <node id="7735" label="PCMTD1"/>
      <node id="7734" label="BEST2"/>
      <node id="7733" label="INSRR"/>
      <node id="7732" label="KIFC1"/>
      <node id="7731" label="C1orf87"/>
      <node id="7730" label="CXorf30"/>
      <node id="7729" label="RNF128"/>
      <node id="7728" label="RFC4"/>
      <node id="7727" label="ZNF639"/>
      <node id="7726" label="CLIC1"/>
      <node id="7725" label="ITGA2"/>
      <node id="7724" label="CRB3"/>
      <node id="7723" label="DLC1"/>
      <node id="7722" label="KIF2C"/>
      <node id="7721" label="GRHL3"/>
      <node id="7720" label="GSTM1"/>
      <node id="7719" label="CLDN18"/>
      <node id="7718" label="GPD1L"/>
      <node id="7717" label="CAT"/>
      <node id="7716" label="AURKB"/>
      <node id="7715" label="NRN1"/>
      <node id="7714" label="EMX2"/>
      <node id="7713" label="GPR50"/>
      <node id="7712" label="PDE3A"/>
      <node id="7711" label="NDUFA4L2"/>
      <node id="7710" label="HIGD1B"/>
      <node id="7709" label="WDR76"/>
      <node id="7708" label="MKI67"/>
      <node id="7707" label="KIF7"/>
      <node id="7706" label="TEX101"/>
      <node id="7705" label="MFSD2A"/>
      <node id="7704" label="TROAP"/>
      <node id="7703" label="THBD"/>
      <node id="7702" label="EN1"/>
      <node id="7701" label="KCNB2"/>
      <node id="7700" label="SDR42E1"/>
      <node id="7699" label="CDC45"/>
      <node id="7698" label="ANGPTL7"/>
      <node id="7697" label="USH1G"/>
      <node id="7696" label="TMEM87A"/>
      <node id="7695" label="SEZ6L2"/>
      <node id="7694" label="ITGA1"/>
      <node id="7693" label="S1PR1"/>
      <node id="7692" label="KIF23"/>
      <node id="7691" label="RCAN1"/>
      <node id="7690" label="STARD8"/>
      <node id="7689" label="NUSAP1"/>
      <node id="7688" label="EFCAB1"/>
      <node id="7687" label="CDC25C"/>
      <node id="7686" label="EDNRB"/>
      <node id="7685" label="PCBP3"/>
      <node id="7684" label="GIMAP8"/>
      <node id="7683" label="SAMHD1"/>
      <node id="7682" label="HSPB8"/>
      <node id="7681" label="EFS"/>
      <node id="7680" label="TRA2B"/>
      <node id="7679" label="PCSK9"/>
      <node id="7678" label="CDKL2"/>
      <node id="7677" label="FOXQ1"/>
      <node id="7676" label="EXO1"/>
      <node id="7675" label="POTEG"/>
      <node id="7674" label="POTEM"/>
      <node id="7673" label="SDCBP"/>
      <node id="7672" label="ERO1L"/>
      <node id="7671" label="KIF20A"/>
      <node id="7670" label="ZNF572"/>
      <node id="7669" label="TSPY2"/>
      <node id="7668" label="CLIC5"/>
      <node id="7667" label="VASH2"/>
      <node id="7666" label="TEK"/>
      <node id="7665" label="FBXO45"/>
      <node id="7664" label="MMP28"/>
      <node id="7663" label="NEK2"/>
      <node id="7662" label="LMO2"/>
      <node id="7661" label="TNXB"/>
      <node id="7660" label="FGFR2"/>
      <node id="7659" label="ARHGEF15"/>
      <node id="7658" label="OR7D2"/>
      <node id="7657" label="LMO3"/>
      <node id="7656" label="TMEM204"/>
      <node id="7655" label="ASCL4"/>
      <node id="7654" label="TCL1B"/>
      <node id="7653" label="EMCN"/>
      <node id="7652" label="SH2D3C"/>
      <node id="7651" label="RHOBTB2"/>
      <node id="7650" label="FBXW12"/>
      <node id="7649" label="ERLEC1"/>
      <node id="7648" label="TSPY3"/>
      <node id="7647" label="TNS4"/>
      <node id="7646" label="SMKR1"/>
      <node id="7645" label="PPIAL4A"/>
      <node id="7644" label="ANK3"/>
      <node id="7643" label="EFCAB12"/>
      <node id="7642" label="ASF1B"/>
      <node id="7641" label="ROBO4"/>
      <node id="7640" label="H2AFY2"/>
      <node id="7639" label="AC023632.1"/>
      <node id="7638" label="AL138847.1"/>
      <node id="7637" label="PCDH12"/>
      <node id="7636" label="CLEC1A"/>
      <node id="7635" label="STIL"/>
      <node id="7634" label="DNAJA4"/>
      <node id="7633" label="SAPCD2"/>
      <node id="7632" label="ETNK2"/>
      <node id="7631" label="RRM2"/>
      <node id="7630" label="FBLN5"/>
      <node id="7629" label="ITGB4"/>
      <node id="7628" label="CASC5"/>
      <node id="7627" label="SPRR2D"/>
      <node id="7626" label="SPRR1B"/>
      <node id="7625" label="C3orf65"/>
      <node id="7624" label="FGFR4"/>
      <node id="7623" label="GJA1"/>
      <node id="7622" label="FLT1"/>
      <node id="7621" label="VSIG10"/>
      <node id="7620" label="ITGA4"/>
      <node id="7619" label="GTSE1"/>
      <node id="7618" label="CHRNA5"/>
      <node id="7617" label="MYO7B"/>
      <node id="7616" label="PADI3"/>
      <node id="7615" label="SERTM1"/>
      <node id="7614" label="KANK2"/>
      <node id="7613" label="C14orf1"/>
      <node id="7612" label="RNF152"/>
      <node id="7611" label="CTAG2"/>
      <node id="7610" label="USP5"/>
      <node id="7609" label="AIF1"/>
      <node id="7608" label="HCK"/>
      <node id="7607" label="PPIAL4B"/>
      <node id="7606" label="ACSL5"/>
      <node id="7605" label="HLA-DOA"/>
      <node id="7604" label="MMP24"/>
      <node id="7603" label="LRRC48"/>
      <node id="7602" label="LRRC46"/>
      <node id="7601" label="C14orf132"/>
      <node id="7600" label="ARMS2"/>
      <node id="7599" label="TINAG"/>
      <node id="7598" label="C14orf166B"/>
      <node id="7597" label="KCNA7"/>
      <node id="7596" label="ACKR4"/>
      <node id="7595" label="TRMT6"/>
      <node id="7594" label="MCM8"/>
      <node id="7593" label="AQP1"/>
      <node id="7592" label="CDC6"/>
      <node id="7591" label="OIP5"/>
      <node id="7590" label="ZWILCH"/>
      <node id="7589" label="CPM"/>
      <node id="7588" label="ANKS4B"/>
      <node id="7587" label="MS4A18"/>
      <node id="7586" label="RALYL"/>
      <node id="7585" label="CFHR4"/>
      <node id="7584" label="CDK1"/>
      <node id="7583" label="ESR1"/>
      <node id="7582" label="DDR2"/>
      <node id="7581" label="SERINC1"/>
      <node id="7580" label="MIB1"/>
      <node id="7579" label="FAM133A"/>
      <node id="7578" label="ZWINT"/>
      <node id="7577" label="LRRC23"/>
      <node id="7576" label="KLF13"/>
      <node id="7575" label="ATOH8"/>
      <node id="7574" label="DST"/>
      <node id="7573" label="MCC"/>
      <node id="7572" label="LYVE1"/>
      <node id="7571" label="ISL1"/>
      <node id="7570" label="DGKB"/>
      <node id="7569" label="WIF1"/>
      <node id="7568" label="ETV1"/>
      <node id="7567" label="JAM2"/>
      <node id="7566" label="NSG1"/>
      <node id="7565" label="UCP1"/>
      <node id="7564" label="HOXB1"/>
      <node id="7563" label="AC142381.1"/>
      <node id="7562" label="C11orf54"/>
      <node id="7561" label="LCE1B"/>
      <node id="7560" label="HEPACAM"/>
      <node id="7559" label="SFXN4"/>
      <node id="7558" label="F10"/>
      <node id="7557" label="FAM110C"/>
      <node id="7556" label="PRR11"/>
      <node id="7555" label="SPOCK2"/>
      <node id="7554" label="DUSP4"/>
      <node id="7553" label="SCEL"/>
      <node id="7552" label="ANXA3"/>
      <node id="7551" label="KIAA1244"/>
      <node id="7550" label="LOR"/>
      <node id="7549" label="RPL29"/>
      <node id="7548" label="LHX1"/>
      <node id="7547" label="KRT85"/>
      <node id="7546" label="RFX4"/>
      <node id="7545" label="UBE2U"/>
      <node id="7544" label="FOXF1"/>
      <node id="7543" label="S100B"/>
      <node id="7542" label="HDAC1"/>
      <node id="7541" label="S100A14"/>
      <node id="7540" label="VCP"/>
      <node id="7539" label="ARHGEF6"/>
      <node id="7538" label="IFI16"/>
      <node id="7537" label="OLFML1"/>
      <node id="7536" label="C1QTNF6"/>
      <node id="7535" label="GRAMD2"/>
      <node id="7534" label="CYYR1"/>
      <node id="7533" label="KCNJ15"/>
      <node id="7532" label="CYP51A1"/>
      <node id="7531" label="RRAS"/>
      <node id="7530" label="MAGEA1"/>
      <node id="7529" label="C11orf86"/>
      <node id="7528" label="HJURP"/>
      <node id="7527" label="BUB1B"/>
      <node id="7526" label="GIMAP7"/>
      <node id="7525" label="SPRR2B"/>
      <node id="7524" label="LCE3D"/>
      <node id="7523" label="C18orf8"/>
      <node id="7522" label="ST3GAL5"/>
      <node id="7521" label="BUB1"/>
      <node id="7520" label="C1orf192"/>
      <node id="7519" label="RAD51AP1"/>
      <node id="7518" label="NCAPD2"/>
      <node id="7517" label="JAM3"/>
      <node id="7516" label="NLRP11"/>
      <node id="7515" label="TM4SF5"/>
      <node id="7514" label="CDH6"/>
      <node id="7513" label="CCDC74A"/>
      <node id="7512" label="GIP"/>
      <node id="7511" label="CGB"/>
      <node id="7510" label="KIAA0430"/>
      <node id="7509" label="KLF4"/>
      <node id="7508" label="KDM5B"/>
      <node id="7507" label="KIAA0247"/>
      <node id="7506" label="CMSS1"/>
      <node id="7505" label="KIAA1524"/>
      <node id="7504" label="C17orf98"/>
      <node id="7503" label="MSGN1"/>
      <node id="7502" label="CRTAC1"/>
      <node id="7501" label="ACOXL"/>
      <node id="7500" label="POP5"/>
      <node id="7499" label="GPR128"/>
      <node id="7498" label="SRPK1"/>
      <node id="7497" label="SLC30A7"/>
      <node id="7496" label="ZCRB1"/>
      <node id="7495" label="ADAM23"/>
      <node id="7494" label="TXN"/>
      <node id="7493" label="PRUNE2"/>
      <node id="7492" label="RAMP2"/>
      <node id="7491" label="SPHKAP"/>
      <node id="7490" label="KBTBD13"/>
      <node id="7489" label="STOX2"/>
      <node id="7488" label="FAXC"/>
      <node id="7487" label="PAICS"/>
      <node id="7486" label="HSPA9"/>
      <node id="7485" label="FOXE1"/>
      <node id="7484" label="C19orf69"/>
      <node id="7483" label="GYS2"/>
      <node id="7482" label="NPSR1"/>
      <node id="7481" label="PTRF"/>
      <node id="7480" label="KCNK10"/>
      <node id="7479" label="RETSAT"/>
      <node id="7478" label="PMP2"/>
      <node id="7477" label="ZIC4"/>
      <node id="7476" label="ARHGAP11B"/>
      <node id="7475" label="CXorf36"/>
      <node id="7474" label="MAP6D1"/>
      <node id="7473" label="IFITM5"/>
      <node id="7472" label="SYT14"/>
      <node id="7471" label="ALPL"/>
      <node id="7470" label="ADRA1A"/>
      <node id="7469" label="INA"/>
      <node id="7468" label="TST"/>
      <node id="7467" label="ARHGAP15"/>
      <node id="7466" label="ADRB2"/>
      <node id="7465" label="MILR1"/>
      <node id="7464" label="FLI1"/>
      <node id="7463" label="TMEM164"/>
      <node id="7462" label="LRRC25"/>
      <node id="7461" label="AKAP2"/>
      <node id="7460" label="CDK6"/>
      <node id="7459" label="CDCA3"/>
      <node id="7458" label="C22orf42"/>
      <node id="7457" label="PDIA6"/>
      <node id="7456" label="PDIA4"/>
      <node id="7455" label="PRKCQ"/>
      <node id="7454" label="DEPDC1B"/>
      <node id="7453" label="SLC7A5"/>
      <node id="7452" label="SEMA3G"/>
      <node id="7451" label="ACADL"/>
      <node id="7450" label="IFITM2"/>
      <node id="7449" label="GRM1"/>
      <node id="7448" label="RBL1"/>
      <node id="7447" label="DQX1"/>
      <node id="7446" label="PRSS3"/>
      <node id="7445" label="TRIM71"/>
      <node id="7444" label="THSD1"/>
      <node id="7443" label="ARHGEF16"/>
      <node id="7442" label="PRR5"/>
      <node id="7441" label="MMRN2"/>
      <node id="7440" label="CCNB1"/>
      <node id="7439" label="WNT11"/>
      <node id="7438" label="TMEM139"/>
      <node id="7437" label="ATP13A4"/>
      <node id="7436" label="TSPAN13"/>
      <node id="7435" label="ITGB3"/>
      <node id="7434" label="MAD2L1"/>
      <node id="7433" label="AUNIP"/>
      <node id="7432" label="CDC25A"/>
      <node id="7431" label="ZNF560"/>
      <node id="7430" label="CTD-2105E13.6"/>
      <node id="7429" label="GNG11"/>
      <node id="7428" label="CYP4F2"/>
      <node id="7427" label="HMMR"/>
      <node id="7426" label="HOXB3"/>
      <node id="7425" label="NCKAP1L"/>
      <node id="7424" label="PPP1R18"/>
      <node id="7423" label="BPIFB4"/>
      <node id="7422" label="GP2"/>
      <node id="7421" label="UGT2A1"/>
      <node id="7420" label="CLPSL1"/>
      <node id="7419" label="CTD-3214H19.16"/>
      <node id="7418" label="RBMS3"/>
      <node id="7417" label="TTK"/>
      <node id="7416" label="ACTBL2"/>
      <node id="7415" label="UGT2B15"/>
      <node id="7414" label="SLC7A7"/>
      <node id="7413" label="SUSD2"/>
      <node id="7412" label="MAGED2"/>
      <node id="7411" label="FABP12"/>
      <node id="7410" label="C16orf59"/>
      <node id="7409" label="SHISA9"/>
      <node id="7408" label="DENND5A"/>
      <node id="7407" label="NGFRAP1"/>
      <node id="7406" label="CENPF"/>
      <node id="7405" label="SKA1"/>
      <node id="7404" label="ALOX5"/>
      <node id="7403" label="B3GNT8"/>
      <node id="7402" label="SNAI2"/>
      <node id="7401" label="CTHRC1"/>
      <node id="7400" label="ERBB3"/>
      <node id="7399" label="IVL"/>
      <node id="7398" label="KRT6B"/>
      <node id="7397" label="PKMYT1"/>
      <node id="7396" label="FMO5"/>
      <node id="7395" label="CYP4F11"/>
      <node id="7394" label="AKR1B10"/>
      <node id="7393" label="GEMIN4"/>
      <node id="7392" label="GSG2"/>
      <node id="7391" label="IL37"/>
      <node id="7390" label="IL36G"/>
      <node id="7389" label="SPRR1A"/>
      <node id="7388" label="SPRR2A"/>
      <node id="7387" label="ATP11B"/>
      <node id="7386" label="TRIM72"/>
      <node id="7385" label="ADAMTS20"/>
      <node id="7384" label="MAB21L1"/>
      <node id="7383" label="TOX"/>
      <node id="7382" label="ZFP42"/>
      <node id="7381" label="MAGEA11"/>
      <node id="7380" label="NFASC"/>
      <node id="7379" label="SLC39A8"/>
      <node id="7378" label="ACVRL1"/>
      <node id="7377" label="DNAJC5G"/>
      <node id="7376" label="TMPRSS11D"/>
      <node id="7375" label="SPRR2E"/>
      <node id="7374" label="NUF2"/>
      <node id="7373" label="FXYD6"/>
      <node id="7372" label="ST7"/>
      <node id="7371" label="RBMS1"/>
      <node id="7370" label="ADAMTS9"/>
      <node id="7369" label="KPRP"/>
      <node id="7368" label="CXorf48"/>
      <node id="7367" label="VWF"/>
      <node id="7366" label="SDK2"/>
      <node id="7365" label="CHRNA9"/>
      <node id="7364" label="DSG1"/>
      <node id="7363" label="FAM114A2"/>
      <node id="7362" label="CDH18"/>
      <node id="7361" label="ALOX15B"/>
      <node id="7360" label="RCSD1"/>
      <node id="7359" label="ABI3BP"/>
      <node id="7358" label="EPS15"/>
      <node id="7357" label="TACSTD2"/>
      <node id="7356" label="JARID2"/>
      <node id="7355" label="DSP"/>
      <node id="7354" label="KCTD15"/>
      <node id="7353" label="PINK1"/>
      <node id="7352" label="TBCCD1"/>
      <node id="7351" label="DLL4"/>
      <node id="7350" label="RP11-144F15.1"/>
      <node id="7349" label="ILVBL"/>
      <node id="7348" label="ALDH5A1"/>
      <node id="7347" label="HIF1A"/>
      <node id="7346" label="LAD1"/>
      <node id="7345" label="PNMA2"/>
      <node id="7344" label="ADAMTS12"/>
      <node id="7343" label="TUBGCP4"/>
      <node id="7342" label="VPS13C"/>
      <node id="7341" label="MAGEA9B"/>
      <node id="7340" label="AC091801.1"/>
      <node id="7339" label="TOR4A"/>
      <node id="7338" label="BAALC"/>
      <node id="7337" label="SLC16A1"/>
      <node id="7336" label="TRIP10"/>
      <node id="7335" label="IARS"/>
      <node id="7334" label="KCNJ9"/>
      <node id="7333" label="CCDC166"/>
      <node id="7332" label="HSPB2"/>
      <node id="7331" label="SASH3"/>
      <node id="7330" label="TESC"/>
      <node id="7329" label="TNFAIP8L2"/>
      <node id="7328" label="MTUS1"/>
      <node id="7327" label="SGOL1"/>
      <node id="7326" label="TMPRSS4"/>
      <node id="7325" label="ORC6"/>
      <node id="7324" label="SDR9C7"/>
      <node id="7323" label="CRCT1"/>
      <node id="7322" label="EHF"/>
      <node id="7321" label="NFE2L2"/>
      <node id="7320" label="UBXN7"/>
      <node id="7319" label="CNRIP1"/>
      <node id="7318" label="SLC16A4"/>
      <node id="7317" label="UFD1L"/>
      <node id="7316" label="KCNK3"/>
      <node id="7315" label="PPM1G"/>
      <node id="7314" label="NME1"/>
      <node id="7313" label="RNASEK"/>
      <node id="7312" label="NDC80"/>
      <node id="7311" label="RFTN1"/>
      <node id="7310" label="NID2"/>
      <node id="7309" label="CD300C"/>
      <node id="7308" label="AC007461.1"/>
      <node id="7307" label="DAZ3"/>
      <node id="7306" label="DAZ4"/>
      <node id="7305" label="RILP"/>
      <node id="7304" label="AP1S1"/>
      <node id="7303" label="ZNF18"/>
      <node id="7302" label="TRIM16L"/>
      <node id="7301" label="UBE2T"/>
      <node id="7300" label="SPC24"/>
      <node id="7299" label="SERPINA10"/>
      <node id="7298" label="AADACL2"/>
      <node id="7297" label="HDGFRP3"/>
      <node id="7296" label="C17orf99"/>
      <node id="7295" label="HAVCR1"/>
      <node id="7294" label="FGD5"/>
      <node id="7293" label="DACT1"/>
      <node id="7292" label="APOL3"/>
      <node id="7291" label="RP11-307N16.6"/>
      <node id="7290" label="PDZD2"/>
      <node id="7289" label="DAB2"/>
      <node id="7288" label="RTP1"/>
      <node id="7287" label="NAP1L2"/>
      <node id="7286" label="MAGEC3"/>
      <node id="7285" label="C15orf54"/>
      <node id="7284" label="CTNNA1"/>
      <node id="7283" label="DRAM1"/>
      <node id="7282" label="HS6ST3"/>
      <node id="7281" label="UNC80"/>
      <node id="7280" label="LST1"/>
      <node id="7279" label="S1PR4"/>
      <node id="7278" label="PRKCH"/>
      <node id="7277" label="SERPINA4"/>
      <node id="7276" label="ASB11"/>
      <node id="7275" label="UCK2"/>
      <node id="7274" label="LRRC32"/>
      <node id="7273" label="RP11-332O19.5"/>
      <node id="7272" label="SLIT2"/>
      <node id="7271" label="ATP4A"/>
      <node id="7270" label="FOXD4L4"/>
      <node id="7269" label="CD2AP"/>
      <node id="7268" label="GNAQ"/>
      <node id="7267" label="CD4"/>
      <node id="7266" label="CSRP1"/>
      <node id="7265" label="RBPMS2"/>
      <node id="7264" label="FGFRL1"/>
      <node id="7263" label="AHCYL2"/>
      <node id="7262" label="TSPYL5"/>
      <node id="7261" label="RUVBL1"/>
      <node id="7260" label="RAB37"/>
      <node id="7259" label="ASAH1"/>
      <node id="7258" label="GYPC"/>
      <node id="7257" label="CDCA2"/>
      <node id="7256" label="RASSF2"/>
      <node id="7255" label="PTGER2"/>
      <node id="7254" label="WWC2"/>
      <node id="7253" label="FAM167A"/>
      <node id="7252" label="SERTAD2"/>
      <node id="7251" label="STX11"/>
      <node id="7250" label="ZMYND12"/>
      <node id="7249" label="C1orf116"/>
      <node id="7248" label="PRSS8"/>
      <node id="7247" label="CEP152"/>
      <node id="7246" label="PRC1"/>
      <node id="7245" label="BICD2"/>
      <node id="7244" label="C15orf59"/>
      <node id="7243" label="CYSLTR1"/>
      <node id="7242" label="TMEM214"/>
      <node id="7241" label="HSD17B4"/>
      <node id="7240" label="KIAA0101"/>
      <node id="7239" label="CD37"/>
      <node id="7238" label="FAM198B"/>
      <node id="7237" label="CCT3"/>
      <node id="7236" label="ZNF750"/>
      <node id="7235" label="ANXA5"/>
      <node id="7234" label="SEPT4"/>
      <node id="7233" label="SLC7A11"/>
      <node id="7232" label="OSCAR"/>
      <node id="7231" label="CASR"/>
      <node id="7230" label="NAALAD2"/>
      <node id="7229" label="GPRIN3"/>
      <node id="7228" label="OLFML3"/>
      <node id="7227" label="PABPC1L2A"/>
      <node id="7226" label="PABPC1L2B"/>
      <node id="7225" label="MEF2C"/>
      <node id="7224" label="P2RY6"/>
      <node id="7223" label="SYK"/>
      <node id="7222" label="C1orf162"/>
      <node id="7221" label="SLC22A3"/>
      <node id="7220" label="ZNF385B"/>
      <node id="7219" label="GMFG"/>
      <node id="7218" label="TNNC1"/>
      <node id="7217" label="CKAP2L"/>
      <node id="7216" label="LRRFIP1"/>
      <node id="7215" label="HIST1H3I"/>
      <node id="7214" label="IGFL3"/>
      <node id="7213" label="KRT6C"/>
      <node id="7212" label="IL36RN"/>
      <node id="7211" label="IQGAP3"/>
      <node id="7210" label="ACSS3"/>
      <node id="7209" label="PRKCD"/>
      <node id="7208" label="COX7A1"/>
      <node id="7207" label="ARMC9"/>
      <node id="7206" label="PCDH17"/>
      <node id="7205" label="TRIM31"/>
      <node id="7204" label="NEIL3"/>
      <node id="7203" label="TK1"/>
      <node id="7202" label="TYMS"/>
      <node id="7201" label="TOMM70A"/>
      <node id="7200" label="C19orf33"/>
      <node id="7199" label="GINS1"/>
      <node id="7198" label="MVP"/>
      <node id="7197" label="HOXA3"/>
      <node id="7196" label="PRELP"/>
      <node id="7195" label="LRP4"/>
      <node id="7194" label="SLCO2B1"/>
      <node id="7193" label="MFNG"/>
      <node id="7192" label="MSRB3"/>
      <node id="7191" label="ARHGAP44"/>
      <node id="7190" label="CADM1"/>
      <node id="7189" label="ESPL1"/>
      <node id="7188" label="FNDC9"/>
      <node id="7187" label="CRNN"/>
      <node id="7186" label="TMEM246"/>
      <node id="7185" label="SLC30A3"/>
      <node id="7184" label="CCDC138"/>
      <node id="7183" label="SHH"/>
      <node id="7182" label="PEBP4"/>
      <node id="7181" label="ARHGEF26"/>
      <node id="7180" label="NKX6-3"/>
      <node id="7179" label="PIGR"/>
      <node id="7178" label="RASGRF1"/>
      <node id="7177" label="RHOF"/>
      <node id="7176" label="TIMELESS"/>
      <node id="7175" label="QPCT"/>
      <node id="7174" label="SPP2"/>
      <node id="7173" label="CCKBR"/>
      <node id="7172" label="TPRXL"/>
      <node id="7171" label="CNGB1"/>
      <node id="7170" label="C2orf81"/>
      <node id="7169" label="PLK1"/>
      <node id="7168" label="FAM211A"/>
      <node id="7167" label="BLM"/>
      <node id="7166" label="CTAG1A"/>
      <node id="7165" label="CNGA3"/>
      <node id="7164" label="SLC22A11"/>
      <node id="7163" label="FANCI"/>
      <node id="7162" label="CDHR3"/>
      <node id="7161" label="SLC31A2"/>
      <node id="7160" label="APBB1"/>
      <node id="7159" label="C6orf222"/>
      <node id="7158" label="RPUSD2"/>
      <node id="7157" label="MTFR2"/>
      <node id="7156" label="TMEM178A"/>
      <node id="7155" label="SPINK4"/>
      <node id="7154" label="RP11-474G23.1"/>
      <node id="7153" label="VANGL2"/>
      <node id="7152" label="KCNH6"/>
      <node id="7151" label="MAGEA3"/>
      <node id="7150" label="SBSN"/>
      <node id="7149" label="MTIF2"/>
      <node id="7148" label="DNAJC1"/>
      <node id="7147" label="ANKRD29"/>
      <node id="7146" label="SLC1A1"/>
      <node id="7145" label="HCRTR2"/>
      <node id="7144" label="HS3ST4"/>
      <node id="7143" label="LCE2C"/>
      <node id="7142" label="LCE2A"/>
      <node id="7141" label="PTP4A2"/>
      <node id="7140" label="RP11-321F6.1"/>
      <node id="7139" label="ZIC5"/>
      <node id="7138" label="RNF17"/>
      <node id="7137" label="TCERG1L"/>
      <node id="7136" label="PFKFB2"/>
      <node id="7135" label="MPP1"/>
      <node id="7134" label="CD47"/>
      <node id="7133" label="SYNE1"/>
      <node id="7132" label="VCAN"/>
      <node id="7131" label="CKS2"/>
      <node id="7130" label="SPC25"/>
      <node id="7129" label="ALDH18A1"/>
      <node id="7128" label="ADH7"/>
      <node id="7127" label="SNCB"/>
      <node id="7126" label="CTF1"/>
      <node id="7125" label="HPCAL1"/>
      <node id="7124" label="SNX21"/>
      <node id="7123" label="FGR"/>
      <node id="7122" label="LYZL4"/>
      <node id="7121" label="CTD-3148I10.1"/>
      <node id="7120" label="SDPR"/>
      <node id="7119" label="NDRG4"/>
      <node id="7118" label="C9orf72"/>
      <node id="7117" label="OR7C1"/>
      <node id="7116" label="GRIK1"/>
      <node id="7115" label="KRT7"/>
      <node id="7114" label="S100A7A"/>
      <node id="7113" label="NPNT"/>
      <node id="7112" label="IGSF10"/>
      <node id="7111" label="UROC1"/>
      <node id="7110" label="NPHS1"/>
      <node id="7109" label="FHL1"/>
      <node id="7108" label="ZNF320"/>
      <node id="7107" label="NFAM1"/>
      <node id="7106" label="SLC7A2"/>
      <node id="7105" label="SIGLEC9"/>
      <node id="7104" label="UNC13B"/>
      <node id="7103" label="ARHGAP32"/>
      <node id="7102" label="PVRL1"/>
      <node id="7101" label="RNASE7"/>
      <node id="7100" label="RBP2"/>
      <node id="7099" label="NTN4"/>
      <node id="7098" label="HSPB6"/>
      <node id="7097" label="CRYAB"/>
      <node id="7096" label="GFOD1"/>
      <node id="7095" label="ITGA8"/>
      <node id="7094" label="DPEP2"/>
      <node id="7093" label="SNCA"/>
      <node id="7092" label="CMPK1"/>
      <node id="7091" label="MAPKAPK3"/>
      <node id="7090" label="CXXC5"/>
      <node id="7089" label="FAM83D"/>
      <node id="7088" label="HIST1H2BD"/>
      <node id="7087" label="CCR1"/>
      <node id="7086" label="MRPL3"/>
      <node id="7085" label="SMO"/>
      <node id="7084" label="NCF4"/>
      <node id="7083" label="GPATCH8"/>
      <node id="7082" label="CENPA"/>
      <node id="7081" label="ZBTB7C"/>
      <node id="7080" label="GPIHBP1"/>
      <node id="7079" label="LGALS4"/>
      <node id="7078" label="UGT1A1"/>
      <node id="7077" label="ANKRD20A4"/>
      <node id="7076" label="WWC3"/>
      <node id="7075" label="SLC25A4"/>
      <node id="7074" label="FAM46B"/>
      <node id="7073" label="NOSTRIN"/>
      <node id="7072" label="DMGDH"/>
      <node id="7071" label="BHMT2"/>
      <node id="7070" label="HOXD12"/>
      <node id="7069" label="PRPF4"/>
      <node id="7068" label="PPT2-EGFL8"/>
      <node id="7067" label="CIT"/>
      <node id="7066" label="RHOQ"/>
      <node id="7065" label="MOGAT1"/>
      <node id="7064" label="TTC22"/>
      <node id="7063" label="RAD54L"/>
      <node id="7062" label="GABARAPL1"/>
      <node id="7061" label="TNFSF13"/>
      <node id="7060" label="CD34"/>
      <node id="7059" label="TMEM56"/>
      <node id="7058" label="SPAG17"/>
      <node id="7057" label="PAQR5"/>
      <node id="7056" label="SCARF1"/>
      <node id="7055" label="CCNO"/>
      <node id="7054" label="PABPC1"/>
      <node id="7053" label="CACNA1B"/>
      <node id="7052" label="UBE2E2"/>
      <node id="7051" label="PRM2"/>
      <node id="7050" label="PRM1"/>
      <node id="7049" label="B4GALNT1"/>
      <node id="7048" label="MMP11"/>
      <node id="7047" label="SMYD4"/>
      <node id="7046" label="DOCK2"/>
      <node id="7045" label="ADAL"/>
      <node id="7044" label="PBK"/>
      <node id="7043" label="C16orf89"/>
      <node id="7042" label="ETF1"/>
      <node id="7041" label="TNFSF12"/>
      <node id="7040" label="C12orf4"/>
      <node id="7039" label="IRX3"/>
      <node id="7038" label="RP11-77K12.1"/>
      <node id="7037" label="HCST"/>
      <node id="7036" label="FAM92B"/>
      <node id="7035" label="DCDC1"/>
      <node id="7034" label="TSR1"/>
      <node id="7033" label="SLAIN1"/>
      <node id="7032" label="PRNP"/>
      <node id="7031" label="FERMT1"/>
      <node id="7030" label="CGB8"/>
      <node id="7029" label="UQCR10"/>
      <node id="7028" label="TUSC3"/>
      <node id="7027" label="KCNK1"/>
      <node id="7026" label="CLSPN"/>
      <node id="7025" label="SESN3"/>
      <node id="7024" label="TMEM105"/>
      <node id="7023" label="HOXD11"/>
      <node id="7022" label="TRPM5"/>
      <node id="7021" label="AMICA1"/>
      <node id="7020" label="FAM212A"/>
      <node id="7019" label="BCL6B"/>
      <node id="7018" label="RBP1"/>
      <node id="7017" label="TJP3"/>
      <node id="7016" label="ARHGAP31"/>
      <node id="7015" label="CYBRD1"/>
      <node id="7014" label="NLRC4"/>
      <node id="7013" label="ZFP36L2"/>
      <node id="7012" label="DAP3"/>
      <node id="7011" label="PGAP1"/>
      <node id="7010" label="OCLN"/>
      <node id="7009" label="GKN2"/>
      <node id="7008" label="GAMT"/>
      <node id="7007" label="GSTM5"/>
      <node id="7006" label="TRIM29"/>
      <node id="7005" label="HOXA2"/>
      <node id="7004" label="AC090616.2"/>
      <node id="7003" label="FABP5"/>
      <node id="7002" label="KRT40"/>
      <node id="7001" label="AL162389.1"/>
      <node id="7000" label="PLEKHO2"/>
      <node id="6999" label="ADAM8"/>
      <node id="6998" label="AC092675.3"/>
      <node id="6997" label="PLK5"/>
      <node id="6996" label="WDR65"/>
      <node id="6995" label="ZBED3"/>
      <node id="6994" label="RP11-122A3.2"/>
      <node id="6993" label="CCT4"/>
      <node id="6992" label="ARRB2"/>
      <node id="6991" label="GLS2"/>
      <node id="6990" label="COL4A5"/>
      <node id="6989" label="FAM107A"/>
      <node id="6988" label="HIST2H2AA4"/>
      <node id="6987" label="DNALI1"/>
      <node id="6986" label="IL17RE"/>
      <node id="6985" label="FAM111B"/>
      <node id="6984" label="TM9SF3"/>
      <node id="6983" label="CPA6"/>
      <node id="6982" label="HTR4"/>
      <node id="6981" label="C6orf15"/>
      <node id="6980" label="IRF8"/>
      <node id="6979" label="IRX2"/>
      <node id="6978" label="TMEM125"/>
      <node id="6977" label="SH2B3"/>
      <node id="6976" label="ACAT1"/>
      <node id="6975" label="CDT1"/>
      <node id="6974" label="EEF1G"/>
      <node id="6973" label="RPL9"/>
      <node id="6972" label="IGSF3"/>
      <node id="6971" label="ITGB2"/>
      <node id="6970" label="KCNC1"/>
      <node id="6969" label="ARHGAP17"/>
      <node id="6968" label="F2"/>
      <node id="6967" label="RP11-201K10.3"/>
      <node id="6966" label="WAS"/>
      <node id="6965" label="CDH24"/>
      <node id="6964" label="HAT1"/>
      <node id="6963" label="SET"/>
      <node id="6962" label="FAM25A"/>
      <node id="6961" label="SLC35F2"/>
      <node id="6960" label="RHOV"/>
      <node id="6959" label="LSG1"/>
      <node id="6958" label="BLID"/>
      <node id="6957" label="OR4C6"/>
      <node id="6956" label="STARD3NL"/>
      <node id="6955" label="SNX20"/>
      <node id="6954" label="RBM47"/>
      <node id="6953" label="ZEB2"/>
      <node id="6952" label="SLC1A6"/>
      <node id="6951" label="ALCAM"/>
      <node id="6950" label="C21orf37"/>
      <node id="6949" label="KCNA1"/>
      <node id="6948" label="FMNL3"/>
      <node id="6947" label="SPN"/>
      <node id="6946" label="RAB42"/>
      <node id="6945" label="GPR52"/>
      <node id="6944" label="HOXD13"/>
      <node id="6943" label="CDCA7"/>
      <node id="6942" label="PSAT1"/>
      <node id="6941" label="MAK"/>
      <node id="6940" label="C9orf24"/>
      <node id="6939" label="TRH"/>
      <node id="6938" label="ASH1L"/>
      <node id="6937" label="SENP2"/>
      <node id="6936" label="OTUD6B"/>
      <node id="6935" label="RAD54B"/>
      <node id="6934" label="CACNA2D1"/>
      <node id="6933" label="FAM20C"/>
      <node id="6932" label="NUDT11"/>
      <node id="6931" label="PAX6"/>
      <node id="6930" label="COX4I2"/>
      <node id="6929" label="MSC"/>
      <node id="6928" label="RP11-512M8.5"/>
      <node id="6927" label="ATAD5"/>
      <node id="6926" label="C17orf53"/>
      <node id="6925" label="LRTOMT"/>
      <node id="6924" label="PEAK1"/>
      <node id="6923" label="PHYHD1"/>
      <node id="6922" label="SSRP1"/>
      <node id="6921" label="LIMK2"/>
      <node id="6920" label="C3orf17"/>
      <node id="6919" label="GATA3"/>
      <node id="6918" label="THBS2"/>
      <node id="6917" label="ITGB6"/>
      <node id="6916" label="ELAVL2"/>
      <node id="6915" label="UGT1A7"/>
      <node id="6914" label="GIMAP4"/>
      <node id="6913" label="TFAP2A"/>
      <node id="6912" label="BCL11A"/>
      <node id="6911" label="APOBR"/>
      <node id="6910" label="SSFA2"/>
      <node id="6909" label="PSMB6"/>
      <node id="6908" label="GNG7"/>
      <node id="6907" label="LL22NC03-63E9.3"/>
      <node id="6906" label="SHMT1"/>
      <node id="6905" label="QRFPR"/>
      <node id="6904" label="PROKR1"/>
      <node id="6903" label="LIN7A"/>
      <node id="6902" label="TBX18"/>
      <node id="6901" label="ZNF488"/>
      <node id="6900" label="C6orf211"/>
      <node id="6899" label="NPFFR2"/>
      <node id="6898" label="ST6GALNAC5"/>
      <node id="6897" label="CENPO"/>
      <node id="6896" label="KCNQ3"/>
      <node id="6895" label="NECAB1"/>
      <node id="6894" label="ENPP2"/>
      <node id="6893" label="PML"/>
      <node id="6892" label="SKA3"/>
      <node id="6891" label="ST6GALNAC6"/>
      <node id="6890" label="ACAP2"/>
      <node id="6889" label="NCKAP5"/>
      <node id="6888" label="SCN7A"/>
      <node id="6887" label="TGFBR2"/>
      <node id="6886" label="SLC39A6"/>
      <node id="6885" label="LHFPL5"/>
      <node id="6884" label="CGA"/>
      <node id="6883" label="DPP4"/>
      <node id="6882" label="SYNE4"/>
      <node id="6881" label="VPS33A"/>
      <node id="6880" label="NLRP9"/>
      <node id="6879" label="SFTPB"/>
      <node id="6878" label="GNPTAB"/>
      <node id="6877" label="VASN"/>
      <node id="6876" label="FAM184A"/>
      <node id="6875" label="FAM71F1"/>
      <node id="6874" label="MAGEA6"/>
      <node id="6873" label="LY96"/>
      <node id="6872" label="TRIM47"/>
      <node id="6871" label="H2AFY"/>
      <node id="6870" label="RP1-4G17.5"/>
      <node id="6869" label="ARRB1"/>
      <node id="6868" label="FPR3"/>
      <node id="6867" label="AP1M2"/>
      <node id="6866" label="SRXN1"/>
      <node id="6865" label="RFC5"/>
      <node id="6864" label="NTF4"/>
      <node id="6863" label="SSBP3"/>
      <node id="6862" label="HGF"/>
      <node id="6861" label="A4GALT"/>
      <node id="6860" label="PCDHB14"/>
      <node id="6859" label="NOVA2"/>
      <node id="6858" label="RAB11FIP1"/>
      <node id="6857" label="CDO1"/>
      <node id="6856" label="KRTDAP"/>
      <node id="6855" label="TFF1"/>
      <node id="6854" label="SCN1B"/>
      <node id="6853" label="C6orf10"/>
      <node id="6852" label="EPHB6"/>
      <node id="6851" label="KIF18A"/>
      <node id="6850" label="AMOTL1"/>
      <node id="6849" label="SLURP1"/>
      <node id="6848" label="RAB3B"/>
      <node id="6847" label="NAPSA"/>
      <node id="6846" label="YIPF7"/>
      <node id="6845" label="PRR15L"/>
      <node id="6844" label="COLGALT2"/>
      <node id="6843" label="ITM2A"/>
      <node id="6842" label="C12orf49"/>
      <node id="6841" label="RGS5"/>
      <node id="6840" label="MARC1"/>
      <node id="6839" label="MC5R"/>
      <node id="6838" label="STARD13"/>
      <node id="6837" label="SLC28A1"/>
      <node id="6836" label="TMEM72"/>
      <node id="6835" label="IDI1"/>
      <node id="6834" label="C2orf54"/>
      <node id="6833" label="SOAT1"/>
      <node id="6832" label="GPR35"/>
      <node id="6831" label="CD69"/>
      <node id="6830" label="LEF1"/>
      <node id="6829" label="IHH"/>
      <node id="6828" label="HNF4A"/>
      <node id="6827" label="SELPLG"/>
      <node id="6826" label="TSPAN11"/>
      <node id="6825" label="GRK5"/>
      <node id="6824" label="MMS22L"/>
      <node id="6823" label="CHAF1A"/>
      <node id="6822" label="SIPA1L2"/>
      <node id="6821" label="AMTN"/>
      <node id="6820" label="UNC45B"/>
      <node id="6819" label="ACAA2"/>
      <node id="6818" label="EFNA3"/>
      <node id="6817" label="NOTCH4"/>
      <node id="6816" label="MBIP"/>
      <node id="6815" label="ITGB7"/>
      <node id="6814" label="PIGV"/>
      <node id="6813" label="SETD8"/>
      <node id="6812" label="SOX17"/>
      <node id="6811" label="ME3"/>
      <node id="6810" label="SNED1"/>
      <node id="6809" label="SFMBT2"/>
      <node id="6808" label="XXYLT1"/>
      <node id="6807" label="MTAP"/>
      <node id="6806" label="LCT"/>
      <node id="6805" label="CSRP3"/>
      <node id="6804" label="RP11-766F14.2"/>
      <node id="6803" label="TIPIN"/>
      <node id="6802" label="PRKCZ"/>
      <node id="6801" label="FGGY"/>
      <node id="6800" label="ECT2"/>
      <node id="6799" label="CASS4"/>
      <node id="6798" label="KLHL6"/>
      <node id="6797" label="SOX11"/>
      <node id="6796" label="DNASE2"/>
      <node id="6795" label="HHIP"/>
      <node id="6794" label="CD74"/>
      <node id="6793" label="GNAT1"/>
      <node id="6792" label="INSM1"/>
      <node id="6791" label="DLGAP4"/>
      <node id="6790" label="CETN2"/>
      <node id="6789" label="SERPINB13"/>
      <node id="6788" label="CD53"/>
      <node id="6787" label="PARPBP"/>
      <node id="6786" label="TRIM10"/>
      <node id="6785" label="RPS27A"/>
      <node id="6784" label="HMGB3"/>
      <node id="6783" label="MCM2"/>
      <node id="6782" label="CNBP"/>
      <node id="6781" label="CPED1"/>
      <node id="6780" label="SELP"/>
      <node id="6779" label="AGFG1"/>
      <node id="6778" label="ARID3C"/>
      <node id="6777" label="PTK2B"/>
      <node id="6776" label="IL19"/>
      <node id="6775" label="ZNF738"/>
      <node id="6774" label="MNDA"/>
      <node id="6773" label="SPTAN1"/>
      <node id="6772" label="ACPP"/>
      <node id="6771" label="SP3"/>
      <node id="6770" label="AIRE"/>
      <node id="6769" label="PLCB4"/>
      <node id="6768" label="CST5"/>
      <node id="6767" label="CCDC50"/>
      <node id="6766" label="SPATS2"/>
      <node id="6765" label="FAM98B"/>
      <node id="6764" label="DAPK2"/>
      <node id="6763" label="GINS2"/>
      <node id="6762" label="TUBB6"/>
      <node id="6761" label="RABEP1"/>
      <node id="6760" label="AKR1C1"/>
      <node id="6759" label="EPT1"/>
      <node id="6758" label="KCNJ8"/>
      <node id="6757" label="CD163"/>
      <node id="6756" label="ERG"/>
      <node id="6755" label="NOP10"/>
      <node id="6754" label="ERF"/>
      <node id="6753" label="COL5A1"/>
      <node id="6752" label="EFCAB11"/>
      <node id="6751" label="ZNF74"/>
      <node id="6750" label="HSPA12B"/>
      <node id="6749" label="FOXL2"/>
      <node id="6748" label="CALHM3"/>
      <node id="6747" label="IGSF6"/>
      <node id="6746" label="CDH22"/>
      <node id="6745" label="ASZ1"/>
      <node id="6744" label="LIPK"/>
      <node id="6743" label="AC104472.1"/>
      <node id="6742" label="MOGAT2"/>
      <node id="6741" label="PHB"/>
      <node id="6740" label="C11orf96"/>
      <node id="6739" label="DIRC1"/>
      <node id="6738" label="TEX35"/>
      <node id="6737" label="ABCC3"/>
      <node id="6736" label="ANO1"/>
      <node id="6735" label="NUMB"/>
      <node id="6734" label="FRMD6"/>
      <node id="6733" label="RNF169"/>
      <node id="6732" label="PCM1"/>
      <node id="6731" label="GNA14"/>
      <node id="6730" label="MYO1C"/>
      <node id="6729" label="CD33"/>
      <node id="6728" label="SLC22A31"/>
      <node id="6727" label="CAPN8"/>
      <node id="6726" label="ABCF3"/>
      <node id="6725" label="FAM92A1"/>
      <node id="6724" label="ZBTB17"/>
      <node id="6723" label="NFRKB"/>
      <node id="6722" label="ZG16"/>
      <node id="6721" label="OBP2B"/>
      <node id="6720" label="NGF"/>
      <node id="6719" label="SLC38A8"/>
      <node id="6718" label="SLCO4C1"/>
      <node id="6717" label="METTL7A"/>
      <node id="6716" label="AC024257.1"/>
      <node id="6715" label="TRIP13"/>
      <node id="6714" label="MRPL36"/>
      <node id="6713" label="CHST7"/>
      <node id="6712" label="ECHDC3"/>
      <node id="6711" label="CD97"/>
      <node id="6710" label="C11orf82"/>
      <node id="6709" label="SALL1"/>
      <node id="6708" label="SCFD2"/>
      <node id="6707" label="CALCOCO1"/>
      <node id="6706" label="TMEM150B"/>
      <node id="6705" label="SBDS"/>
      <node id="6704" label="POU6F2"/>
      <node id="6703" label="KLK5"/>
      <node id="6702" label="TFF2"/>
      <node id="6701" label="AL133373.1"/>
      <node id="6700" label="BPIFC"/>
      <node id="6699" label="EPHA5"/>
      <node id="6698" label="CCT5"/>
      <node id="6697" label="GALNT7"/>
      <node id="6696" label="ATP6V0B"/>
      <node id="6695" label="GOLM1"/>
      <node id="6694" label="SUSD4"/>
      <node id="6693" label="PIH1D2"/>
      <node id="6692" label="HOMER2"/>
      <node id="6691" label="LTF"/>
      <node id="6690" label="SPHK1"/>
      <node id="6689" label="ATP6V0D1"/>
      <node id="6688" label="CAV2"/>
      <node id="6687" label="IL36B"/>
      <node id="6686" label="UBC"/>
      <node id="6685" label="TMEM41A"/>
      <node id="6684" label="DCLK2"/>
      <node id="6683" label="ECHDC1"/>
      <node id="6682" label="SORBS3"/>
      <node id="6681" label="TTC40"/>
      <node id="6680" label="C11orf88"/>
      <node id="6679" label="OLFML2B"/>
      <node id="6678" label="SACM1L"/>
      <node id="6677" label="CFTR"/>
      <node id="6676" label="IGSF9"/>
      <node id="6675" label="DKFZP434E1119"/>
      <node id="6674" label="AHNAK"/>
      <node id="6673" label="LMCD1"/>
      <node id="6672" label="HYAL1"/>
      <node id="6671" label="SPRR2G"/>
      <node id="6670" label="CDSN"/>
      <node id="6669" label="PDLIM2"/>
      <node id="6668" label="UBAP1"/>
      <node id="6667" label="AK1"/>
      <node id="6666" label="C2orf72"/>
      <node id="6665" label="TP63"/>
      <node id="6664" label="SYNGR1"/>
      <node id="6663" label="KAZN"/>
      <node id="6662" label="GNB1L"/>
      <node id="6661" label="RBM12B"/>
      <node id="6660" label="PC"/>
      <node id="6659" label="PAGE4"/>
      <node id="6658" label="MPDU1"/>
      <node id="6657" label="KREMEN1"/>
      <node id="6656" label="SHCBP1"/>
      <node id="6655" label="WISP1"/>
      <node id="6654" label="RPS4Y1"/>
      <node id="6653" label="VASP"/>
      <node id="6652" label="KIF15"/>
      <node id="6651" label="RORC"/>
      <node id="6650" label="MVB12B"/>
      <node id="6649" label="HYAL4"/>
      <node id="6648" label="CYP2C18"/>
      <node id="6647" label="GBP6"/>
      <node id="6646" label="CHD6"/>
      <node id="6645" label="DOCK4"/>
      <node id="6644" label="ADARB1"/>
      <node id="6643" label="CST6"/>
      <node id="6642" label="KNSTRN"/>
      <node id="6641" label="C22orf15"/>
      <node id="6640" label="C8orf47"/>
      <node id="6639" label="PPTC7"/>
      <node id="6638" label="CENPI"/>
      <node id="6637" label="KIF24"/>
      <node id="6636" label="LILRB1"/>
      <node id="6635" label="MAP7"/>
      <node id="6634" label="C15orf61"/>
      <node id="6633" label="PPP1R14D"/>
      <node id="6632" label="CEACAM6"/>
      <node id="6631" label="ELOVL2"/>
      <node id="6630" label="DNAJC25-GNG10"/>
      <node id="6629" label="ATP1A3"/>
      <node id="6628" label="CELF3"/>
      <node id="6627" label="GPR179"/>
      <node id="6626" label="FKBP4"/>
      <node id="6625" label="SLC22A13"/>
      <node id="6624" label="LMO7"/>
      <node id="6623" label="SRM"/>
      <node id="6622" label="MGAT3"/>
      <node id="6621" label="PPP2R2C"/>
      <node id="6620" label="FGA"/>
      <node id="6619" label="RGS3"/>
      <node id="6618" label="INCENP"/>
      <node id="6617" label="MICALL2"/>
      <node id="6616" label="ASCL2"/>
      <node id="6615" label="C19orf59"/>
      <node id="6614" label="HYDIN"/>
      <node id="6613" label="CCDC65"/>
      <node id="6612" label="FILIP1"/>
      <node id="6611" label="CRABP2"/>
      <node id="6610" label="MAGEB17"/>
      <node id="6609" label="CSAG1"/>
      <node id="6608" label="ALPK3"/>
      <node id="6607" label="MOK"/>
      <node id="6606" label="MALL"/>
      <node id="6605" label="AURKA"/>
      <node id="6604" label="MSL2"/>
      <node id="6603" label="AATK"/>
      <node id="6602" label="RND3"/>
      <node id="6601" label="C1QBP"/>
      <node id="6600" label="L2HGDH"/>
      <node id="6599" label="RAN"/>
      <node id="6598" label="FRMD1"/>
      <node id="6597" label="SERPINB9"/>
      <node id="6596" label="AIM1L"/>
      <node id="6595" label="LYPD3"/>
      <node id="6594" label="MFSD6"/>
      <node id="6593" label="GSTA4"/>
      <node id="6592" label="PTGES"/>
      <node id="6591" label="EFHD1"/>
      <node id="6590" label="SFXN1"/>
      <node id="6589" label="CTCFL"/>
      <node id="6588" label="SP7"/>
      <node id="6587" label="CHRNG"/>
      <node id="6586" label="MAN1A2"/>
      <node id="6585" label="KLRG2"/>
      <node id="6584" label="RGCC"/>
      <node id="6583" label="PTPRN2"/>
      <node id="6582" label="TTYH3"/>
      <node id="6581" label="HCRTR1"/>
      <node id="6580" label="AKAP12"/>
      <node id="6579" label="DBT"/>
      <node id="6578" label="SYT6"/>
      <node id="6577" label="RASIP1"/>
      <node id="6576" label="KRTCAP3"/>
      <node id="6575" label="NDUFC2-KCTD14"/>
      <node id="6574" label="LHCGR"/>
      <node id="6573" label="TRIM22"/>
      <node id="6572" label="FABP3"/>
      <node id="6571" label="CCNK"/>
      <node id="6570" label="PON3"/>
      <node id="6569" label="BST2"/>
      <node id="6568" label="TPRG1"/>
      <node id="6567" label="ABHD10"/>
      <node id="6566" label="RORB"/>
      <node id="6565" label="CDH1"/>
      <node id="6564" label="NUP88"/>
      <node id="6563" label="NFATC4"/>
      <node id="6562" label="FOXB1"/>
      <node id="6561" label="FOXD4L2"/>
      <node id="6560" label="C16orf70"/>
      <node id="6559" label="PRMT1"/>
      <node id="6558" label="GPM6A"/>
      <node id="6557" label="ASTN1"/>
      <node id="6556" label="SCGB1D2"/>
      <node id="6555" label="PRKD2"/>
      <node id="6554" label="ILF3"/>
      <node id="6553" label="KCNJ16"/>
      <node id="6552" label="CALML3"/>
      <node id="6551" label="CAPN2"/>
      <node id="6550" label="ADAMTS4"/>
      <node id="6549" label="SH3BP1"/>
      <node id="6548" label="TRPV2"/>
      <node id="6547" label="HAUS2"/>
      <node id="6546" label="SLC6A8"/>
      <node id="6545" label="DKFZP761J1410"/>
      <node id="6544" label="PLA2G4F"/>
      <node id="6543" label="DERA"/>
      <node id="6542" label="SLC5A5"/>
      <node id="6541" label="GDF10"/>
      <node id="6540" label="SOSTDC1"/>
      <node id="6539" label="DPYSL2"/>
      <node id="6538" label="FAN1"/>
      <node id="6537" label="TOPBP1"/>
      <node id="6536" label="GLRX"/>
      <node id="6535" label="TOM1L2"/>
      <node id="6534" label="IDH1"/>
      <node id="6533" label="C21orf58"/>
      <node id="6532" label="PLEKHO1"/>
      <node id="6531" label="CNTNAP4"/>
      <node id="6530" label="CHP1"/>
      <node id="6529" label="CCDC69"/>
      <node id="6528" label="MFAP3L"/>
      <node id="6527" label="PPP4R1L"/>
      <node id="6526" label="FSCN1"/>
      <node id="6525" label="FLT4"/>
      <node id="6524" label="BTK"/>
      <node id="6523" label="RP11-368I7.4"/>
      <node id="6522" label="DRC1"/>
      <node id="6521" label="PSMD8"/>
      <node id="6520" label="TFB2M"/>
      <node id="6519" label="C9orf64"/>
      <node id="6518" label="SNRK"/>
      <node id="6517" label="COL19A1"/>
      <node id="6516" label="RIPK4"/>
      <node id="6515" label="TMTC1"/>
      <node id="6514" label="ALDH7A1"/>
      <node id="6513" label="WFDC11"/>
      <node id="6512" label="GPR12"/>
      <node id="6511" label="STOM"/>
      <node id="6510" label="ACP5"/>
      <node id="6509" label="ATP13A3"/>
      <node id="6508" label="CPT2"/>
      <node id="6507" label="SHROOM2"/>
      <node id="6506" label="HOXB7"/>
      <node id="6505" label="TAS2R31"/>
      <node id="6504" label="SLC34A2"/>
      <node id="6503" label="BEST3"/>
      <node id="6502" label="GTPBP8"/>
      <node id="6501" label="FOLR1"/>
      <node id="6500" label="CA4"/>
      <node id="6499" label="UNC79"/>
      <node id="6498" label="NTN3"/>
      <node id="6497" label="NR5A2"/>
      <node id="6496" label="PTGS2"/>
      <node id="6495" label="ROR2"/>
      <node id="6494" label="KCNE4"/>
      <node id="6493" label="GNGT2"/>
      <node id="6492" label="PERP"/>
      <node id="6491" label="PXMP4"/>
      <node id="6490" label="RPL22L1"/>
      <node id="6489" label="ECE2"/>
      <node id="6488" label="FAM131A"/>
      <node id="6487" label="RYR1"/>
      <node id="6486" label="HELLS"/>
      <node id="6485" label="CCDC180"/>
      <node id="6484" label="SNRPG"/>
      <node id="6483" label="SNRPA1"/>
      <node id="6482" label="TRPS1"/>
      <node id="6481" label="DTD2"/>
      <node id="6480" label="NUP153"/>
      <node id="6479" label="LCN15"/>
      <node id="6478" label="ZSCAN5B"/>
      <node id="6477" label="PIWIL1"/>
      <node id="6476" label="CCDC11"/>
      <node id="6475" label="FAM69C"/>
      <node id="6474" label="PRL"/>
      <node id="6473" label="PODNL1"/>
      <node id="6472" label="FIBIN"/>
      <node id="6471" label="EPB41L5"/>
      <node id="6470" label="BCL2A1"/>
      <node id="6469" label="DIRAS2"/>
      <node id="6468" label="FAM19A3"/>
      <node id="6467" label="LARP1B"/>
      <node id="6466" label="VPS4B"/>
      <node id="6465" label="FAM189A2"/>
      <node id="6464" label="JUP"/>
      <node id="6463" label="KRTAP5-7"/>
      <node id="6462" label="G2E3"/>
      <node id="6461" label="TRPC6"/>
      <node id="6460" label="CBLC"/>
      <node id="6459" label="FUT3"/>
      <node id="6458" label="HEG1"/>
      <node id="6457" label="MRM1"/>
      <node id="6456" label="PGLYRP2"/>
      <node id="6455" label="WASF3"/>
      <node id="6454" label="ACTN1"/>
      <node id="6453" label="ENG"/>
      <node id="6452" label="LGI3"/>
      <node id="6451" label="CPLX3"/>
      <node id="6450" label="GLI2"/>
      <node id="6449" label="IQCE"/>
      <node id="6448" label="METTL13"/>
      <node id="6447" label="HK3"/>
      <node id="6446" label="HS6ST1"/>
      <node id="6445" label="ELTD1"/>
      <node id="6444" label="DENND2A"/>
      <node id="6443" label="MEDAG"/>
      <node id="6442" label="HINT2"/>
      <node id="6441" label="KLHL32"/>
      <node id="6440" label="JAG1"/>
      <node id="6439" label="SASS6"/>
      <node id="6438" label="GIMAP5"/>
      <node id="6437" label="C16orf54"/>
      <node id="6436" label="KRT31"/>
      <node id="6435" label="TMC5"/>
      <node id="6434" label="CSF1R"/>
      <node id="6433" label="MLF1IP"/>
      <node id="6432" label="CBX7"/>
      <node id="6431" label="TBC1D17"/>
      <node id="6430" label="IL4I1"/>
      <node id="6429" label="GAREM"/>
      <node id="6428" label="EME1"/>
      <node id="6427" label="CYP27A1"/>
      <node id="6426" label="FERMT2"/>
      <node id="6425" label="FBXO17"/>
      <node id="6424" label="FAM159B"/>
      <node id="6423" label="KRT24"/>
      <node id="6422" label="EBNA1BP2"/>
      <node id="6421" label="LILRA6"/>
      <node id="6420" label="TUBB3"/>
      <node id="6419" label="PIGX"/>
      <node id="6418" label="ZBTB47"/>
      <node id="6417" label="C17orf70"/>
      <node id="6416" label="SPAG8"/>
      <node id="6415" label="ESPN"/>
      <node id="6414" label="TMEM45A"/>
      <node id="6413" label="PEAR1"/>
      <node id="6412" label="DBR1"/>
      <node id="6411" label="SNX30"/>
      <node id="6410" label="NARG2"/>
      <node id="6409" label="DDX47"/>
      <node id="6408" label="STMN3"/>
      <node id="6407" label="TMEM45B"/>
      <node id="6406" label="TMEM79"/>
      <node id="6405" label="GALM"/>
      <node id="6404" label="PAGE2"/>
      <node id="6403" label="EPHA8"/>
      <node id="6402" label="LRRC8B"/>
      <node id="6401" label="ANKDD1A"/>
      <node id="6400" label="ADPRH"/>
      <node id="6399" label="SCNN1B"/>
      <node id="6398" label="PRKG2"/>
      <node id="6397" label="AQP4"/>
      <node id="6396" label="PTPRF"/>
      <node id="6395" label="IRF6"/>
      <node id="6394" label="CCDC78"/>
      <node id="6393" label="HEY1"/>
      <node id="6392" label="SNX31"/>
      <node id="6391" label="PDCL2"/>
      <node id="6390" label="SLC52A2"/>
      <node id="6389" label="OLR1"/>
      <node id="6388" label="CA2"/>
      <node id="6387" label="RNF168"/>
      <node id="6386" label="FAM174B"/>
      <node id="6385" label="ITGA6"/>
      <node id="6384" label="C1QL2"/>
      <node id="6383" label="SLC18A1"/>
      <node id="6382" label="ZMYM3"/>
      <node id="6381" label="PCSK7"/>
      <node id="6380" label="SAGE1"/>
      <node id="6379" label="CT45A6"/>
      <node id="6378" label="XYLT2"/>
      <node id="6377" label="CCNE1"/>
      <node id="6376" label="EMB"/>
      <node id="6375" label="COL7A1"/>
      <node id="6374" label="RP4-583P15.15"/>
      <node id="6373" label="CCNA2"/>
      <node id="6372" label="GPT2"/>
      <node id="6371" label="CASP14"/>
      <node id="6370" label="TUB"/>
      <node id="6369" label="STX1A"/>
      <node id="6368" label="LRP1"/>
      <node id="6367" label="KIAA1377"/>
      <node id="6366" label="GSTM2"/>
      <node id="6365" label="P2RY1"/>
      <node id="6364" label="MPP7"/>
      <node id="6363" label="E2F2"/>
      <node id="6362" label="FOXE3"/>
      <node id="6361" label="XPR1"/>
      <node id="6360" label="MRPL12"/>
      <node id="6359" label="ZNF318"/>
      <node id="6358" label="PPM1M"/>
      <node id="6357" label="EFCAB6"/>
      <node id="6356" label="CCDC151"/>
      <node id="6355" label="POSTN"/>
      <node id="6354" label="PGD"/>
      <node id="6353" label="THY1"/>
      <node id="6352" label="C3orf67"/>
      <node id="6351" label="AFF2"/>
      <node id="6350" label="CD300LF"/>
      <node id="6349" label="PPIL6"/>
      <node id="6348" label="CD84"/>
      <node id="6347" label="C4orf50"/>
      <node id="6346" label="RPTN"/>
      <node id="6345" label="CDH19"/>
      <node id="6344" label="C9orf152"/>
      <node id="6343" label="SOD3"/>
      <node id="6342" label="GRM4"/>
      <node id="6341" label="ADCY10"/>
      <node id="6340" label="GMNC"/>
      <node id="6339" label="C14orf159"/>
      <node id="6338" label="SKP2"/>
      <node id="6337" label="S100A4"/>
      <node id="6336" label="NPR1"/>
      <node id="6335" label="PCDHB4"/>
      <node id="6334" label="DGKE"/>
      <node id="6333" label="HIRIP3"/>
      <node id="6332" label="UST"/>
      <node id="6331" label="PRSS53"/>
      <node id="6330" label="DISP2"/>
      <node id="6329" label="B3GAT1"/>
      <node id="6328" label="EYA2"/>
      <node id="6327" label="COPZ1"/>
      <node id="6326" label="P2RX4"/>
      <node id="6325" label="PHF5A"/>
      <node id="6324" label="NUFIP2"/>
      <node id="6323" label="SOX2"/>
      <node id="6322" label="PKP1"/>
      <node id="6321" label="QTRTD1"/>
      <node id="6320" label="RHOG"/>
      <node id="6319" label="MC4R"/>
      <node id="6318" label="HAND2"/>
      <node id="6317" label="UBB"/>
      <node id="6316" label="ARHGAP39"/>
      <node id="6315" label="C1orf112"/>
      <node id="6314" label="ALG3"/>
      <node id="6313" label="SNAPC5"/>
      <node id="6312" label="SLC30A8"/>
      <node id="6311" label="ACTN4"/>
      <node id="6310" label="UNKL"/>
      <node id="6309" label="CYB5R2"/>
      <node id="6308" label="CLDN1"/>
      <node id="6307" label="TMEM100"/>
      <node id="6306" label="GRK7"/>
      <node id="6305" label="CALN1"/>
      <node id="6304" label="ARHGDIB"/>
      <node id="6303" label="THBS1"/>
      <node id="6302" label="TMEM30B"/>
      <node id="6301" label="PPP1R35"/>
      <node id="6300" label="FIS1"/>
      <node id="6299" label="CCT7"/>
      <node id="6298" label="FAM69B"/>
      <node id="6297" label="TNIP1"/>
      <node id="6296" label="A2ML1"/>
      <node id="6295" label="LAMA3"/>
      <node id="6294" label="MAGI3"/>
      <node id="6293" label="PIK3R6"/>
      <node id="6292" label="SNTB1"/>
      <node id="6291" label="SIK2"/>
      <node id="6290" label="PRIM1"/>
      <node id="6289" label="POTEE"/>
      <node id="6288" label="LTA4H"/>
      <node id="6287" label="WDR62"/>
      <node id="6286" label="PGLYRP3"/>
      <node id="6285" label="EIF3J"/>
      <node id="6284" label="SMIM12"/>
      <node id="6283" label="DDX21"/>
      <node id="6282" label="TADA1"/>
      <node id="6281" label="SART3"/>
      <node id="6280" label="SMC4"/>
      <node id="6279" label="EMP3"/>
      <node id="6278" label="CDH12"/>
      <node id="6277" label="COQ3"/>
      <node id="6276" label="SDR16C5"/>
      <node id="6275" label="IPMK"/>
      <node id="6274" label="FOXL1"/>
      <node id="6273" label="IL15RA"/>
      <node id="6272" label="FKBP15"/>
      <node id="6271" label="C2ORF15"/>
      <node id="6270" label="FITM2"/>
      <node id="6269" label="DGKA"/>
      <node id="6268" label="MPPED1"/>
      <node id="6267" label="NANOG"/>
      <node id="6266" label="ACAT2"/>
      <node id="6265" label="RAB25"/>
      <node id="6264" label="KRT3"/>
      <node id="6263" label="SNRPD3"/>
      <node id="6262" label="AAAS"/>
      <node id="6261" label="SLC25A11"/>
      <node id="6260" label="XRCC2"/>
      <node id="6259" label="TMEM116"/>
      <node id="6258" label="CCDC17"/>
      <node id="6257" label="SCNN1D"/>
      <node id="6256" label="CSF2RB"/>
      <node id="6255" label="NGB"/>
      <node id="6254" label="VRK1"/>
      <node id="6253" label="PLS1"/>
      <node id="6252" label="STAG2"/>
      <node id="6251" label="PSMG3"/>
      <node id="6250" label="VSNL1"/>
      <node id="6249" label="SNX3"/>
      <node id="6248" label="IL6ST"/>
      <node id="6247" label="TFE3"/>
      <node id="6246" label="ALG1"/>
      <node id="6245" label="FAM136A"/>
      <node id="6244" label="CYP4F3"/>
      <node id="6243" label="TRPA1"/>
      <node id="6242" label="LIMCH1"/>
      <node id="6241" label="CCBE1"/>
      <node id="6240" label="KCNK5"/>
      <node id="6239" label="LRRC58"/>
      <node id="6238" label="MET"/>
      <node id="6237" label="CHMP4C"/>
      <node id="6236" label="CCDC43"/>
      <node id="6235" label="GNG5P2"/>
      <node id="6234" label="LARP6"/>
      <node id="6233" label="MAPK3"/>
      <node id="6232" label="COTL1"/>
      <node id="6231" label="NKX2-5"/>
      <node id="6230" label="QPRT"/>
      <node id="6229" label="SH3GL1"/>
      <node id="6228" label="CCDC58"/>
      <node id="6227" label="MFAP4"/>
      <node id="6226" label="MDK"/>
      <node id="6225" label="RFX7"/>
      <node id="6224" label="ABCB5"/>
      <node id="6223" label="SCAP"/>
      <node id="6222" label="ABCC1"/>
      <node id="6221" label="DHX33"/>
      <node id="6220" label="PLEKHB2"/>
      <node id="6219" label="PARVG"/>
      <node id="6218" label="MAGEA9"/>
      <node id="6217" label="C21orf88"/>
      <node id="6216" label="SOX21"/>
      <node id="6215" label="LAMB3"/>
      <node id="6214" label="SEC23B"/>
      <node id="6213" label="TRMT10C"/>
      <node id="6212" label="C1orf56"/>
      <node id="6211" label="PSMA4"/>
      <node id="6210" label="RELB"/>
      <node id="6209" label="PABPN1"/>
      <node id="6208" label="SLC7A3"/>
      <node id="6207" label="HSD17B6"/>
      <node id="6206" label="CDKN2A"/>
      <node id="6205" label="ADI1"/>
      <node id="6204" label="TSFM"/>
      <node id="6203" label="XXcos-LUCA11.5"/>
      <node id="6202" label="OTOP2"/>
      <node id="6201" label="LMNB2"/>
      <node id="6200" label="CYP4B1"/>
      <node id="6199" label="SLC50A1"/>
      <node id="6198" label="TMEM192"/>
      <node id="6197" label="CEP350"/>
      <node id="6196" label="ZNF106"/>
      <node id="6195" label="MNS1"/>
      <node id="6194" label="APBB1IP"/>
      <node id="6193" label="THEMIS2"/>
      <node id="6192" label="ROS1"/>
      <node id="6191" label="MTBP"/>
      <node id="6190" label="MCM4"/>
      <node id="6189" label="GDPD2"/>
      <node id="6188" label="PHACTR1"/>
      <node id="6187" label="BRK1"/>
      <node id="6186" label="ESRP2"/>
      <node id="6185" label="DKC1"/>
      <node id="6184" label="CGN"/>
      <node id="6183" label="HIF1AN"/>
      <node id="6182" label="USP6NL"/>
      <node id="6181" label="PPP1R12C"/>
      <node id="6180" label="ABCD3"/>
      <node id="6179" label="SFXN3"/>
      <node id="6178" label="GSPT2"/>
      <node id="6177" label="NPY4R"/>
      <node id="6176" label="IL23A"/>
      <node id="6175" label="NEXN"/>
      <node id="6174" label="PTHLH"/>
      <node id="6173" label="IL20RB"/>
      <node id="6172" label="LPL"/>
      <node id="6171" label="UMPS"/>
      <node id="6170" label="CAMTA2"/>
      <node id="6169" label="HMGXB4"/>
      <node id="6168" label="EZH2"/>
      <node id="6167" label="STEAP4"/>
      <node id="6166" label="GK"/>
      <node id="6165" label="FLOT1"/>
      <node id="6164" label="C4orf47"/>
      <node id="6163" label="PLEKHA8"/>
      <node id="6162" label="CENPL"/>
      <node id="6161" label="ZNF362"/>
      <node id="6160" label="CSF3R"/>
      <node id="6159" label="P2RY14"/>
      <node id="6158" label="C19orf66"/>
      <node id="6157" label="DLG5"/>
      <node id="6156" label="RBMS2"/>
      <node id="6155" label="ZNF597"/>
      <node id="6154" label="DCLRE1A"/>
      <node id="6153" label="BMP3"/>
      <node id="6152" label="GPX2"/>
      <node id="6151" label="KIAA0319"/>
      <node id="6150" label="PRKD1"/>
      <node id="6149" label="PRDM15"/>
      <node id="6148" label="MAP3K3"/>
      <node id="6147" label="IPP"/>
      <node id="6146" label="ERMAP"/>
      <node id="6145" label="CRYBA1"/>
      <node id="6144" label="PAX3"/>
      <node id="6143" label="ING4"/>
      <node id="6142" label="PTPRC"/>
      <node id="6141" label="CFP"/>
      <node id="6140" label="TNFRSF25"/>
      <node id="6139" label="GAS6"/>
      <node id="6138" label="SLAMF8"/>
      <node id="6137" label="MFSD7"/>
      <node id="6136" label="GDE1"/>
      <node id="6135" label="CEP97"/>
      <node id="6134" label="NGFR"/>
      <node id="6133" label="TMEM117"/>
      <node id="6132" label="RAPGEFL1"/>
      <node id="6131" label="RECQL5"/>
      <node id="6130" label="JRKL"/>
      <node id="6129" label="MAD2L2"/>
      <node id="6128" label="MYBPC2"/>
      <node id="6127" label="C9orf16"/>
      <node id="6126" label="COX5A"/>
      <node id="6125" label="PDCD7"/>
      <node id="6124" label="FKBP9"/>
      <node id="6123" label="CBX1"/>
      <node id="6122" label="QKI"/>
      <node id="6121" label="GCHFR"/>
      <node id="6120" label="NCOA4"/>
      <node id="6119" label="HRAS"/>
      <node id="6118" label="RASSF7"/>
      <node id="6117" label="TULP1"/>
      <node id="6116" label="TMBIM4"/>
      <node id="6115" label="R3HDM4"/>
      <node id="6114" label="FZD5"/>
      <node id="6113" label="BNC1"/>
      <node id="6112" label="EIF1AY"/>
      <node id="6111" label="CBL"/>
      <node id="6110" label="CPSF3"/>
      <node id="6109" label="SLC43A2"/>
      <node id="6108" label="STAC3"/>
      <node id="6107" label="MARCH11"/>
      <node id="6106" label="HOOK1"/>
      <node id="6105" label="ALDH6A1"/>
      <node id="6104" label="SIX1"/>
      <node id="6103" label="OSBPL11"/>
      <node id="6102" label="LMX1A"/>
      <node id="6101" label="KCTD14"/>
      <node id="6100" label="ESRRB"/>
      <node id="6099" label="FANK1"/>
      <node id="6098" label="FNBP1L"/>
      <node id="6097" label="NINJ2"/>
      <node id="6096" label="CISH"/>
      <node id="6095" label="SDHC"/>
      <node id="6094" label="LSS"/>
      <node id="6093" label="CALCRL"/>
      <node id="6092" label="PTPN1"/>
      <node id="6091" label="C10orf128"/>
      <node id="6090" label="SLC9A3R2"/>
      <node id="6089" label="SEPT8"/>
      <node id="6088" label="FAM127A"/>
      <node id="6087" label="RIF1"/>
      <node id="6086" label="IFT57"/>
      <node id="6085" label="TIPRL"/>
      <node id="6084" label="IFT80"/>
      <node id="6083" label="PRIM2"/>
      <node id="6082" label="POLR2F"/>
      <node id="6081" label="DEFB124"/>
      <node id="6080" label="CD300LB"/>
      <node id="6079" label="CDCA7L"/>
      <node id="6078" label="MUC1"/>
      <node id="6077" label="SUV39H1"/>
      <node id="6076" label="NHP2"/>
      <node id="6075" label="DTL"/>
      <node id="6074" label="MGME1"/>
      <node id="6073" label="F2RL3"/>
      <node id="6072" label="PES1"/>
      <node id="6071" label="TCP1"/>
      <node id="6070" label="SYTL3"/>
      <node id="6069" label="DDOST"/>
      <node id="6068" label="SHMT2"/>
      <node id="6067" label="MICAL2"/>
      <node id="6066" label="E2F8"/>
      <node id="6065" label="SIRPA"/>
      <node id="6064" label="KLHDC7A"/>
      <node id="6063" label="KIF18B"/>
      <node id="6062" label="CUEDC2"/>
      <node id="6061" label="SMC2"/>
      <node id="6060" label="DACT3"/>
      <node id="6059" label="CAPNS2"/>
      <node id="6058" label="HGFAC"/>
      <node id="6057" label="SRPRB"/>
      <node id="6056" label="MRPS12"/>
      <node id="6055" label="RICTOR"/>
      <node id="6054" label="CMTM7"/>
      <node id="6053" label="MYO9B"/>
      <node id="6052" label="DUT"/>
      <node id="6051" label="ZNF367"/>
      <node id="6050" label="TBX4"/>
      <node id="6049" label="GPC6"/>
      <node id="6048" label="WNT5A"/>
      <node id="6047" label="RPRD2"/>
      <node id="6046" label="CLK3"/>
      <node id="6045" label="CYHR1"/>
      <node id="6044" label="RNASEH2A"/>
      <node id="6043" label="ID4"/>
      <node id="6042" label="CIITA"/>
      <node id="6041" label="LNX2"/>
      <node id="6040" label="PLA1A"/>
      <node id="6039" label="ATP9A"/>
      <node id="6038" label="NAA50"/>
      <node id="6037" label="STRAP"/>
      <node id="6036" label="STX12"/>
      <node id="6035" label="PDLIM3"/>
      <node id="6034" label="JMJD6"/>
      <node id="6033" label="PEA15"/>
      <node id="6032" label="EPX"/>
      <node id="6031" label="SLC25A10"/>
      <node id="6030" label="CYB561D2"/>
      <node id="6029" label="TNFRSF1B"/>
      <node id="6028" label="POC1A"/>
      <node id="6027" label="SIN3A"/>
      <node id="6026" label="BMP7"/>
      <node id="6025" label="HNF4G"/>
      <node id="6024" label="C6ORF165"/>
      <node id="6023" label="P2RY13"/>
      <node id="6022" label="ZMAT4"/>
      <node id="6021" label="SMG9"/>
      <node id="6020" label="TRIML2"/>
      <node id="6019" label="MOAP1"/>
      <node id="6018" label="CD200"/>
      <node id="6017" label="STX4"/>
      <node id="6016" label="C11orf52"/>
      <node id="6015" label="NUMBL"/>
      <node id="6014" label="GALT"/>
      <node id="6013" label="ZBTB42"/>
      <node id="6012" label="CEP85"/>
      <node id="6011" label="WDR63"/>
      <node id="6010" label="TTLL10"/>
      <node id="6009" label="ARTN"/>
      <node id="6008" label="NDUFS2"/>
      <node id="6007" label="METTL14"/>
      <node id="6006" label="CHRD"/>
      <node id="6005" label="EDC3"/>
      <node id="6004" label="TMEM179"/>
      <node id="6003" label="CSNK1G1"/>
      <node id="6002" label="ZC3H13"/>
      <node id="6001" label="MYO1F"/>
      <node id="6000" label="CHERP"/>
      <node id="5999" label="ARL6IP5"/>
      <node id="5998" label="DGCR2"/>
      <node id="5997" label="ACTL8"/>
      <node id="5996" label="ATPAF1"/>
      <node id="5995" label="ARHGAP11A"/>
      <node id="5994" label="EPB41L2"/>
      <node id="5993" label="VAMP2"/>
      <node id="5992" label="RECK"/>
      <node id="5991" label="SNX19"/>
      <node id="5990" label="IQCG"/>
      <node id="5989" label="LRRTM1"/>
      <node id="5988" label="ACHE"/>
      <node id="5987" label="HPN"/>
      <node id="5986" label="EI24"/>
      <node id="5985" label="SPINT1"/>
      <node id="5984" label="DDX39A"/>
      <node id="5983" label="RHOC"/>
      <node id="5982" label="ADCY9"/>
      <node id="5981" label="PDHB"/>
      <node id="5980" label="PCNA"/>
      <node id="5979" label="HEATR3"/>
      <node id="5978" label="ATXN1L"/>
      <node id="5977" label="GALNT3"/>
      <node id="5976" label="BTBD9"/>
      <node id="5975" label="KCNN4"/>
      <node id="5974" label="FANCB"/>
      <node id="5973" label="MGA"/>
      <node id="5972" label="WDR59"/>
      <node id="5971" label="DEPDC1"/>
      <node id="5970" label="PPP2CB"/>
      <node id="5969" label="PLSCR4"/>
      <node id="5968" label="FGG"/>
      <node id="5967" label="GIMAP2"/>
      <node id="5966" label="FAM160A1"/>
      <node id="5965" label="CRKL"/>
      <node id="5964" label="LEPRE1"/>
      <node id="5963" label="DSG3"/>
      <node id="5962" label="FOXP3"/>
      <node id="5961" label="CTSA"/>
      <node id="5960" label="MARK2"/>
      <node id="5959" label="GTF2A2"/>
      <node id="5958" label="WNT3"/>
      <node id="5957" label="DAZAP1"/>
      <node id="5956" label="FLJ14816"/>
      <node id="5955" label="UPP1"/>
      <node id="5954" label="PLG"/>
      <node id="5953" label="OAS1"/>
      <node id="5952" label="CENPW"/>
      <node id="5951" label="HMG20B"/>
      <node id="5950" label="ULK1"/>
      <node id="5949" label="SYNM"/>
      <node id="5948" label="RAB36"/>
      <node id="5947" label="C15ORF37"/>
      <node id="5946" label="F11"/>
      <node id="5945" label="BRIP1"/>
      <node id="5944" label="HOXA11"/>
      <node id="5943" label="IL17REL"/>
      <node id="5942" label="ANGPT1"/>
      <node id="5941" label="DLK1"/>
      <node id="5940" label="CDC27"/>
      <node id="5939" label="AIFM1"/>
      <node id="5938" label="SLCO2A1"/>
      <node id="5937" label="RASGRP4"/>
      <node id="5936" label="NRGN"/>
      <node id="5935" label="DEK"/>
      <node id="5934" label="FLAD1"/>
      <node id="5933" label="DSG2"/>
      <node id="5932" label="CA10"/>
      <node id="5931" label="FBXW11"/>
      <node id="5930" label="C2orf44"/>
      <node id="5929" label="KHDRBS2"/>
      <node id="5928" label="CERS3"/>
      <node id="5927" label="GDI1"/>
      <node id="5926" label="KCNRG"/>
      <node id="5925" label="LILRA5"/>
      <node id="5924" label="FRMPD2"/>
      <node id="5923" label="ADGB"/>
      <node id="5922" label="LRG1"/>
      <node id="5921" label="PPP6R3"/>
      <node id="5920" label="DYNLRB2"/>
      <node id="5919" label="ALLC"/>
      <node id="5918" label="VDAC1"/>
      <node id="5917" label="STAT5A"/>
      <node id="5916" label="PRDX6"/>
      <node id="5915" label="TM9SF2"/>
      <node id="5914" label="G6PD"/>
      <node id="5913" label="C9orf117"/>
      <node id="5912" label="GPR4"/>
      <node id="5911" label="PARP4"/>
      <node id="5910" label="FHDC1"/>
      <node id="5909" label="RSBN1L"/>
      <node id="5908" label="DCAF8"/>
      <node id="5907" label="SLC39A10"/>
      <node id="5906" label="RACGAP1"/>
      <node id="5905" label="PPAP2B"/>
      <node id="5904" label="MDFI"/>
      <node id="5903" label="PAK7"/>
      <node id="5902" label="MLKL"/>
      <node id="5901" label="NUDT1"/>
      <node id="5900" label="MIA-RAB4B"/>
      <node id="5899" label="ATP6V1B2"/>
      <node id="5898" label="SCD"/>
      <node id="5897" label="RALGDS"/>
      <node id="5896" label="FRRS1L"/>
      <node id="5895" label="PKIG"/>
      <node id="5894" label="CDC42EP5"/>
      <node id="5893" label="MYO5B"/>
      <node id="5892" label="ELAC2"/>
      <node id="5891" label="KCTD5"/>
      <node id="5890" label="FBXO32"/>
      <node id="5889" label="DLX2"/>
      <node id="5888" label="SNRPF"/>
      <node id="5887" label="MGLL"/>
      <node id="5886" label="PPT2"/>
      <node id="5885" label="BORA"/>
      <node id="5884" label="ABCC6"/>
      <node id="5883" label="RFC3"/>
      <node id="5882" label="CLPTM1L"/>
      <node id="5881" label="PSMD3"/>
      <node id="5880" label="KLF15"/>
      <node id="5879" label="DNMT3A"/>
      <node id="5878" label="DOK2"/>
      <node id="5877" label="RAB17"/>
      <node id="5876" label="PFDN2"/>
      <node id="5875" label="MAPRE1"/>
      <node id="5874" label="DDX19A"/>
      <node id="5873" label="SECISBP2L"/>
      <node id="5872" label="PBXIP1"/>
      <node id="5871" label="UBE2R2"/>
      <node id="5870" label="C2orf62"/>
      <node id="5869" label="PCDHB15"/>
      <node id="5868" label="RAB14"/>
      <node id="5867" label="GGTLC2"/>
      <node id="5866" label="RFPL1"/>
      <node id="5865" label="LACTB2"/>
      <node id="5864" label="FGF14"/>
      <node id="5863" label="YEATS4"/>
      <node id="5862" label="ETV5"/>
      <node id="5861" label="MARCH5"/>
      <node id="5860" label="FLVCR2"/>
      <node id="5859" label="ZFYVE9"/>
      <node id="5858" label="HENMT1"/>
      <node id="5857" label="FUCA1"/>
      <node id="5856" label="FBXO5"/>
      <node id="5855" label="PPP2R2A"/>
      <node id="5854" label="PATL1"/>
      <node id="5853" label="GBP2"/>
      <node id="5852" label="PREX2"/>
      <node id="5851" label="ANKRD62"/>
      <node id="5850" label="SLC31A1"/>
      <node id="5849" label="FAM83H"/>
      <node id="5848" label="MCMBP"/>
      <node id="5847" label="OGFR"/>
      <node id="5846" label="MCF2"/>
      <node id="5845" label="TMEM53"/>
      <node id="5844" label="TM7SF2"/>
      <node id="5843" label="SMARCB1"/>
      <node id="5842" label="RTKN2"/>
      <node id="5841" label="TJP1"/>
      <node id="5840" label="PCYT1B"/>
      <node id="5839" label="DLGAP2"/>
      <node id="5838" label="RSL24D1"/>
      <node id="5837" label="CDK5"/>
      <node id="5836" label="ARL2"/>
      <node id="5835" label="DPH6"/>
      <node id="5834" label="MYH14"/>
      <node id="5833" label="RPAP1"/>
      <node id="5832" label="TUBG2"/>
      <node id="5831" label="LPCAT1"/>
      <node id="5830" label="NKX1-2"/>
      <node id="5829" label="NR0B1"/>
      <node id="5828" label="IFNGR2"/>
      <node id="5827" label="PMEPA1"/>
      <node id="5826" label="SLC25A33"/>
      <node id="5825" label="PCDHGB7"/>
      <node id="5824" label="EHHADH"/>
      <node id="5823" label="SAFB"/>
      <node id="5822" label="PARVB"/>
      <node id="5821" label="NDUFS7"/>
      <node id="5820" label="FCHO2"/>
      <node id="5819" label="C1orf35"/>
      <node id="5818" label="GRIN3B"/>
      <node id="5817" label="NEK5"/>
      <node id="5816" label="XRCC6"/>
      <node id="5815" label="GRAP"/>
      <node id="5814" label="ATG3"/>
      <node id="5813" label="HYAL2"/>
      <node id="5812" label="CR1"/>
      <node id="5811" label="GALNT10"/>
      <node id="5810" label="LIN9"/>
      <node id="5809" label="AARS"/>
      <node id="5808" label="TNFAIP1"/>
      <node id="5807" label="NDUFS6"/>
      <node id="5806" label="MTRNR2L4"/>
      <node id="5805" label="TGFBR3"/>
      <node id="5804" label="PITPNB"/>
      <node id="5803" label="ACE"/>
      <node id="5802" label="SPATA5L1"/>
      <node id="5801" label="SPDL1"/>
      <node id="5800" label="EAPP"/>
      <node id="5799" label="BAZ2A"/>
      <node id="5798" label="NPHP1"/>
      <node id="5797" label="MPRIP"/>
      <node id="5796" label="RAB40C"/>
      <node id="5795" label="TRIB3"/>
      <node id="5794" label="RCC1"/>
      <node id="5793" label="TMSB15A"/>
      <node id="5792" label="TMEM132A"/>
      <node id="5791" label="SDCBP2"/>
      <node id="5790" label="L3MBTL4"/>
      <node id="5789" label="HIST2H2AA3"/>
      <node id="5788" label="MRPL46"/>
      <node id="5787" label="RAB4B"/>
      <node id="5786" label="UXT"/>
      <node id="5785" label="SCGN"/>
      <node id="5784" label="LRRC3C"/>
      <node id="5783" label="C19orf38"/>
      <node id="5782" label="DENND1A"/>
      <node id="5781" label="IGDCC3"/>
      <node id="5780" label="ESRP1"/>
      <node id="5779" label="FICD"/>
      <node id="5778" label="RBPMS"/>
      <node id="5777" label="PRSS1"/>
      <node id="5776" label="SGCD"/>
      <node id="5775" label="FAM160B2"/>
      <node id="5774" label="COL5A2"/>
      <node id="5773" label="PFN2"/>
      <node id="5772" label="DHX36"/>
      <node id="5771" label="LPCAT3"/>
      <node id="5770" label="NUP37"/>
      <node id="5769" label="SIX5"/>
      <node id="5768" label="STXBP6"/>
      <node id="5767" label="TMED2"/>
      <node id="5766" label="PTMA"/>
      <node id="5765" label="FDPS"/>
      <node id="5764" label="RP6-24A23.6"/>
      <node id="5763" label="GAPDH"/>
      <node id="5762" label="RND1"/>
      <node id="5761" label="COL16A1"/>
      <node id="5760" label="PEX11A"/>
      <node id="5759" label="C9orf89"/>
      <node id="5758" label="CSMD3"/>
      <node id="5757" label="OTX2"/>
      <node id="5756" label="LAT2"/>
      <node id="5755" label="GPSM3"/>
      <node id="5754" label="GREM1"/>
      <node id="5753" label="SLC1A7"/>
      <node id="5752" label="CAD"/>
      <node id="5751" label="GMPPA"/>
      <node id="5750" label="NDUFA11"/>
      <node id="5749" label="SBSPON"/>
      <node id="5748" label="SYNPO"/>
      <node id="5747" label="STC2"/>
      <node id="5746" label="OPTN"/>
      <node id="5745" label="FGF21"/>
      <node id="5744" label="H2BFM"/>
      <node id="5743" label="LMAN2"/>
      <node id="5742" label="GHITM"/>
      <node id="5741" label="CLDN5"/>
      <node id="5740" label="CACYBP"/>
      <node id="5739" label="COLEC11"/>
      <node id="5738" label="IL16"/>
      <node id="5737" label="EIF2S2"/>
      <node id="5736" label="CD86"/>
      <node id="5735" label="C1orf172"/>
      <node id="5734" label="CASC3"/>
      <node id="5733" label="SH3GLB1"/>
      <node id="5732" label="TMEM243"/>
      <node id="5731" label="PYGL"/>
      <node id="5730" label="CCDC92"/>
      <node id="5729" label="AGTPBP1"/>
      <node id="5728" label="RSPH1"/>
      <node id="5727" label="OR7A5"/>
      <node id="5726" label="DHX9"/>
      <node id="5725" label="HABP4"/>
      <node id="5724" label="FBXO38"/>
      <node id="5723" label="RLBP1"/>
      <node id="5722" label="MAGEC1"/>
      <node id="5721" label="YBX3"/>
      <node id="5720" label="PAPSS2"/>
      <node id="5719" label="SAMD14"/>
      <node id="5718" label="UBE2S"/>
      <node id="5717" label="IFNL2"/>
      <node id="5716" label="LCE1E"/>
      <node id="5715" label="LAPTM5"/>
      <node id="5714" label="MED14"/>
      <node id="5713" label="KCTD10"/>
      <node id="5712" label="LRRC14"/>
      <node id="5711" label="C1orf74"/>
      <node id="5710" label="RPA1"/>
      <node id="5709" label="PGAP2"/>
      <node id="5708" label="RIBC2"/>
      <node id="5707" label="KCND3"/>
      <node id="5706" label="FNDC3B"/>
      <node id="5705" label="GSTM3"/>
      <node id="5704" label="SPTSSA"/>
      <node id="5703" label="ABHD2"/>
      <node id="5702" label="SPIC"/>
      <node id="5701" label="AC008948.1"/>
      <node id="5700" label="HAAO"/>
      <node id="5699" label="AKAP13"/>
      <node id="5698" label="SPATA17"/>
      <node id="5697" label="TOMM22"/>
      <node id="5696" label="CT45A1"/>
      <node id="5695" label="VWA9"/>
      <node id="5694" label="HCN3"/>
      <node id="5693" label="C1orf68"/>
      <node id="5692" label="PCDH15"/>
      <node id="5691" label="KRT5"/>
      <node id="5690" label="BHMT"/>
      <node id="5689" label="IL3RA"/>
      <node id="5688" label="PPFIA3"/>
      <node id="5687" label="PIK3R5"/>
      <node id="5686" label="CASP1"/>
      <node id="5685" label="ACOX2"/>
      <node id="5684" label="DNAAF3"/>
      <node id="5683" label="COLEC12"/>
      <node id="5682" label="GTF3C1"/>
      <node id="5681" label="CD3E"/>
      <node id="5680" label="IL1RAP"/>
      <node id="5679" label="IDH3A"/>
      <node id="5678" label="TGM3"/>
      <node id="5677" label="AKAP14"/>
      <node id="5676" label="KLHL2"/>
      <node id="5675" label="ZNF770"/>
      <node id="5674" label="PSMC5"/>
      <node id="5673" label="IREB2"/>
      <node id="5672" label="FAM154B"/>
      <node id="5671" label="FMO6P"/>
      <node id="5670" label="C4orf22"/>
      <node id="5669" label="MCM7"/>
      <node id="5668" label="ILF2"/>
      <node id="5667" label="ABTB1"/>
      <node id="5666" label="ADCK5"/>
      <node id="5665" label="PAK6"/>
      <node id="5664" label="GPM6B"/>
      <node id="5663" label="ICA1"/>
      <node id="5662" label="PYCR1"/>
      <node id="5661" label="CD180"/>
      <node id="5660" label="CTDSP2"/>
      <node id="5659" label="IGFBP3"/>
      <node id="5658" label="SH3PXD2B"/>
      <node id="5657" label="TMEM176A"/>
      <node id="5656" label="HAUS8"/>
      <node id="5655" label="NEK11"/>
      <node id="5654" label="C1orf54"/>
      <node id="5653" label="TGFB1I1"/>
      <node id="5652" label="CISD3"/>
      <node id="5651" label="DYDC2"/>
      <node id="5650" label="C19orf10"/>
      <node id="5649" label="HAVCR2"/>
      <node id="5648" label="GTF3C4"/>
      <node id="5647" label="CXCL16"/>
      <node id="5646" label="ZBTB21"/>
      <node id="5645" label="ARGLU1"/>
      <node id="5644" label="KIAA0907"/>
      <node id="5643" label="PTPLAD1"/>
      <node id="5642" label="CXorf67"/>
      <node id="5641" label="OR2H2"/>
      <node id="5640" label="NABP2"/>
      <node id="5639" label="C1orf123"/>
      <node id="5638" label="FAM64A"/>
      <node id="5637" label="POLR1B"/>
      <node id="5636" label="RTN4"/>
      <node id="5635" label="TRIM27"/>
      <node id="5634" label="LMOD2"/>
      <node id="5633" label="SAT2"/>
      <node id="5632" label="YWHAG"/>
      <node id="5631" label="RXFP1"/>
      <node id="5630" label="UNC13D"/>
      <node id="5629" label="PEBP1"/>
      <node id="5628" label="C5orf38"/>
      <node id="5627" label="MND1"/>
      <node id="5626" label="PNO1"/>
      <node id="5625" label="SPAG5"/>
      <node id="5624" label="TDRD12"/>
      <node id="5623" label="TUFT1"/>
      <node id="5622" label="UNG"/>
      <node id="5621" label="GMPS"/>
      <node id="5620" label="KPNA3"/>
      <node id="5619" label="TWF1"/>
      <node id="5618" label="GBE1"/>
      <node id="5617" label="C1orf210"/>
      <node id="5616" label="ACSM3"/>
      <node id="5615" label="ARF4"/>
      <node id="5614" label="FAM27D1"/>
      <node id="5613" label="SERPINB12"/>
      <node id="5612" label="CT45A3"/>
      <node id="5611" label="DRG1"/>
      <node id="5610" label="PTBP3"/>
      <node id="5609" label="LAIR1"/>
      <node id="5608" label="KIF1C"/>
      <node id="5607" label="ADH5"/>
      <node id="5606" label="RCAN2"/>
      <node id="5605" label="MCCC1"/>
      <node id="5604" label="GCNT2"/>
      <node id="5603" label="MTCH2"/>
      <node id="5602" label="CDC14A"/>
      <node id="5601" label="MSMO1"/>
      <node id="5600" label="PAFAH2"/>
      <node id="5599" label="LRRD1"/>
      <node id="5598" label="LSM14B"/>
      <node id="5597" label="LZTS1"/>
      <node id="5596" label="PCYOX1"/>
      <node id="5595" label="WDR54"/>
      <node id="5594" label="MUL1"/>
      <node id="5593" label="OPHN1"/>
      <node id="5592" label="SLC25A52"/>
      <node id="5591" label="MARVELD2"/>
      <node id="5590" label="FBXL19"/>
      <node id="5589" label="CYB5R3"/>
      <node id="5588" label="HSPA2"/>
      <node id="5587" label="SNTN"/>
      <node id="5586" label="ACBD5"/>
      <node id="5585" label="LRRC59"/>
      <node id="5584" label="BZW2"/>
      <node id="5583" label="CDK2"/>
      <node id="5582" label="MNAT1"/>
      <node id="5581" label="ZNF704"/>
      <node id="5580" label="DAPL1"/>
      <node id="5579" label="LEPROT"/>
      <node id="5578" label="UBL3"/>
      <node id="5577" label="MMRN1"/>
      <node id="5576" label="C6orf195"/>
      <node id="5575" label="LYRM2"/>
      <node id="5574" label="LHFP"/>
      <node id="5573" label="RAB20"/>
      <node id="5572" label="GPRIN2"/>
      <node id="5571" label="HID1"/>
      <node id="5570" label="RAB6B"/>
      <node id="5569" label="C18orf54"/>
      <node id="5568" label="CLEC2B"/>
      <node id="5567" label="CD164L2"/>
      <node id="5566" label="VSTM2L"/>
      <node id="5565" label="PIP5KL1"/>
      <node id="5564" label="WBP1"/>
      <node id="5563" label="CASP4"/>
      <node id="5562" label="SHB"/>
      <node id="5561" label="RP11-156P1.2"/>
      <node id="5560" label="PRKX"/>
      <node id="5559" label="MED11"/>
      <node id="5558" label="MTG1"/>
      <node id="5557" label="DNA2"/>
      <node id="5556" label="SLC44A4"/>
      <node id="5555" label="GPR137"/>
      <node id="5554" label="PDLIM7"/>
      <node id="5553" label="MTFMT"/>
      <node id="5552" label="KLHL25"/>
      <node id="5551" label="SGOL2"/>
      <node id="5550" label="FANCE"/>
      <node id="5549" label="MON1A"/>
      <node id="5548" label="C15orf40"/>
      <node id="5547" label="MTM1"/>
      <node id="5546" label="CTAGE6"/>
      <node id="5545" label="USP51"/>
      <node id="5544" label="PDK2"/>
      <node id="5543" label="SOX15"/>
      <node id="5542" label="LY6G6C"/>
      <node id="5541" label="ADAM21"/>
      <node id="5540" label="CYTH4"/>
      <node id="5539" label="SEC24A"/>
      <node id="5538" label="YAP1"/>
      <node id="5537" label="MED6"/>
      <node id="5536" label="WIPF1"/>
      <node id="5535" label="ATP2B4"/>
      <node id="5534" label="AC006116.20"/>
      <node id="5533" label="CNTNAP2"/>
      <node id="5532" label="DIS3L"/>
      <node id="5531" label="UBQLN1"/>
      <node id="5530" label="AGPAT2"/>
      <node id="5529" label="PGAP3"/>
      <node id="5528" label="ZNF540"/>
      <node id="5527" label="GSPT1"/>
      <node id="5526" label="NIT2"/>
      <node id="5525" label="LPXN"/>
      <node id="5524" label="KIAA1598"/>
      <node id="5523" label="C15orf41"/>
      <node id="5522" label="BICD1"/>
      <node id="5521" label="DNAJC9"/>
      <node id="5520" label="SYNE2"/>
      <node id="5519" label="RASD2"/>
      <node id="5518" label="PHLDB2"/>
      <node id="5517" label="FARSB"/>
      <node id="5516" label="ZYX"/>
      <node id="5515" label="MACF1"/>
      <node id="5514" label="CCDC59"/>
      <node id="5513" label="TSC22D1"/>
      <node id="5512" label="SREBF2"/>
      <node id="5511" label="SEPT10"/>
      <node id="5510" label="TGDS"/>
      <node id="5509" label="CTD-2228K2.5"/>
      <node id="5508" label="FMO3"/>
      <node id="5507" label="MARVELD3"/>
      <node id="5506" label="GSTO1"/>
      <node id="5505" label="MLNR"/>
      <node id="5504" label="KLK12"/>
      <node id="5503" label="MYO6"/>
      <node id="5502" label="HDAC7"/>
      <node id="5501" label="CYP21A2"/>
      <node id="5500" label="AOC1"/>
      <node id="5499" label="STOML2"/>
      <node id="5498" label="SLCO6A1"/>
      <node id="5497" label="CTDSPL2"/>
      <node id="5496" label="RBM17"/>
      <node id="5495" label="KCNQ1"/>
      <node id="5494" label="ARFGAP3"/>
      <node id="5493" label="SMAGP"/>
      <node id="5492" label="BCAT2"/>
      <node id="5491" label="PELP1"/>
      <node id="5490" label="FKSG61"/>
      <node id="5489" label="SLITRK2"/>
      <node id="5488" label="VPS25"/>
      <node id="5487" label="MYH10"/>
      <node id="5486" label="TFRC"/>
      <node id="5485" label="SDC1"/>
      <node id="5484" label="IKBKE"/>
      <node id="5483" label="MLK4"/>
      <node id="5482" label="TSPAN4"/>
      <node id="5481" label="HSF1"/>
      <node id="5480" label="DSCC1"/>
      <node id="5479" label="ACADSB"/>
      <node id="5478" label="CYP7A1"/>
      <node id="5477" label="GPR124"/>
      <node id="5476" label="RPAP3"/>
      <node id="5475" label="FNBP1"/>
      <node id="5474" label="LCN1"/>
      <node id="5473" label="IL2RG"/>
      <node id="5472" label="SNX2"/>
      <node id="5471" label="PTK6"/>
      <node id="5470" label="ARIH1"/>
      <node id="5469" label="DDX52"/>
      <node id="5468" label="FAXDC2"/>
      <node id="5467" label="SHROOM3"/>
      <node id="5466" label="FIGF"/>
      <node id="5465" label="COL6A6"/>
      <node id="5464" label="MAN1C1"/>
      <node id="5463" label="TFCP2L1"/>
      <node id="5462" label="RNFT1"/>
      <node id="5461" label="FAM20A"/>
      <node id="5460" label="SH3YL1"/>
      <node id="5459" label="KLC3"/>
      <node id="5458" label="PRDM10"/>
      <node id="5457" label="KRIT1"/>
      <node id="5456" label="TDRD1"/>
      <node id="5455" label="ATP11A"/>
      <node id="5454" label="TUBGCP5"/>
      <node id="5453" label="FAM181B"/>
      <node id="5452" label="TRAM1"/>
      <node id="5451" label="ASB7"/>
      <node id="5450" label="MARS"/>
      <node id="5449" label="ACIN1"/>
      <node id="5448" label="CPN2"/>
      <node id="5447" label="AMPD3"/>
      <node id="5446" label="CENPE"/>
      <node id="5445" label="KANK1"/>
      <node id="5444" label="MAP7D1"/>
      <node id="5443" label="RAE1"/>
      <node id="5442" label="RAB40B"/>
      <node id="5441" label="RHNO1"/>
      <node id="5440" label="GSTA1"/>
      <node id="5439" label="PGPEP1L"/>
      <node id="5438" label="HM13"/>
      <node id="5437" label="FANCD2"/>
      <node id="5436" label="TRPM2"/>
      <node id="5435" label="ATP10A"/>
      <node id="5434" label="C22orf39"/>
      <node id="5433" label="MS4A7"/>
      <node id="5432" label="MSH5"/>
      <node id="5431" label="MRPS23"/>
      <node id="5430" label="PCDHA12"/>
      <node id="5429" label="SPINK7"/>
      <node id="5428" label="SF3B5"/>
      <node id="5427" label="HMCES"/>
      <node id="5426" label="SRD5A1"/>
      <node id="5425" label="MORN2"/>
      <node id="5424" label="SPAST"/>
      <node id="5423" label="SEC13"/>
      <node id="5422" label="YOD1"/>
      <node id="5421" label="ZNF212"/>
      <node id="5420" label="PFAS"/>
      <node id="5419" label="ANP32A"/>
      <node id="5418" label="AQP9"/>
      <node id="5417" label="CSNK1E"/>
      <node id="5416" label="RASGRP3"/>
      <node id="5415" label="LY86"/>
      <node id="5414" label="SRD5A3"/>
      <node id="5413" label="CLASP1"/>
      <node id="5412" label="ZNF69"/>
      <node id="5411" label="HHLA2"/>
      <node id="5410" label="WDR16"/>
      <node id="5409" label="BANK1"/>
      <node id="5408" label="TNFRSF10D"/>
      <node id="5407" label="GSTK1"/>
      <node id="5406" label="DLX5"/>
      <node id="5405" label="AKR1C2"/>
      <node id="5404" label="TMEM177"/>
      <node id="5403" label="KIAA0226L"/>
      <node id="5402" label="HELZ"/>
      <node id="5401" label="URB1"/>
      <node id="5400" label="FKBP10"/>
      <node id="5399" label="CST7"/>
      <node id="5398" label="GBP3"/>
      <node id="5397" label="POMP"/>
      <node id="5396" label="MGST2"/>
      <node id="5395" label="TJP2"/>
      <node id="5394" label="GMNN"/>
      <node id="5393" label="PRPS2"/>
      <node id="5392" label="SFTPA2"/>
      <node id="5391" label="C11orf53"/>
      <node id="5390" label="ANKRD33"/>
      <node id="5389" label="FRMD4A"/>
      <node id="5388" label="NIPAL3"/>
      <node id="5387" label="KRI1"/>
      <node id="5386" label="RSPH9"/>
      <node id="5385" label="CEACAM21"/>
      <node id="5384" label="FNDC1"/>
      <node id="5383" label="RNASE6"/>
      <node id="5382" label="THUMPD1"/>
      <node id="5381" label="ACOT2"/>
      <node id="5380" label="PLD6"/>
      <node id="5379" label="COX6A2"/>
      <node id="5378" label="PRPS1"/>
      <node id="5377" label="EVI2B"/>
      <node id="5376" label="SAMD4B"/>
      <node id="5375" label="PMM1"/>
      <node id="5374" label="MXD1"/>
      <node id="5373" label="MYO3B"/>
      <node id="5372" label="MEGF9"/>
      <node id="5371" label="USP42"/>
      <node id="5370" label="TMEM114"/>
      <node id="5369" label="NXF2B"/>
      <node id="5368" label="MAP6"/>
      <node id="5367" label="KLF2"/>
      <node id="5366" label="ATF4"/>
      <node id="5365" label="RFC2"/>
      <node id="5364" label="CEP76"/>
      <node id="5363" label="ARID4B"/>
      <node id="5362" label="MARK1"/>
      <node id="5361" label="PLA2G4A"/>
      <node id="5360" label="CNN1"/>
      <node id="5359" label="DOCK8"/>
      <node id="5358" label="PRKAG1"/>
      <node id="5357" label="IGF1R"/>
      <node id="5356" label="SCRN3"/>
      <node id="5355" label="BATF"/>
      <node id="5354" label="CNN3"/>
      <node id="5353" label="THEG"/>
      <node id="5352" label="MYO5C"/>
      <node id="5351" label="EHBP1L1"/>
      <node id="5350" label="NDST1"/>
      <node id="5349" label="BCDIN3D"/>
      <node id="5348" label="POLDIP2"/>
      <node id="5347" label="HSDL1"/>
      <node id="5346" label="TMEM219"/>
      <node id="5345" label="HLA-B"/>
      <node id="5344" label="CNTN2"/>
      <node id="5343" label="MYBPHL"/>
      <node id="5342" label="C12orf50"/>
      <node id="5341" label="KCNV1"/>
      <node id="5340" label="RASL12"/>
      <node id="5339" label="MDGA1"/>
      <node id="5338" label="GMCL1"/>
      <node id="5337" label="CNOT2"/>
      <node id="5336" label="SIAE"/>
      <node id="5335" label="LRRC57"/>
      <node id="5334" label="PSRC1"/>
      <node id="5333" label="CXorf21"/>
      <node id="5332" label="ADAMTS19"/>
      <node id="5331" label="MALT1"/>
      <node id="5330" label="VPS37A"/>
      <node id="5329" label="TRAK1"/>
      <node id="5328" label="BCKDHA"/>
      <node id="5327" label="LHX8"/>
      <node id="5326" label="PREX1"/>
      <node id="5325" label="EPRS"/>
      <node id="5324" label="CPSF4L"/>
      <node id="5323" label="FGD1"/>
      <node id="5322" label="PRR26"/>
      <node id="5321" label="SNRPD1"/>
      <node id="5320" label="CCNT1"/>
      <node id="5319" label="FAS"/>
      <node id="5318" label="WWC1"/>
      <node id="5317" label="SPRYD7"/>
      <node id="5316" label="RAB3GAP2"/>
      <node id="5315" label="AXL"/>
      <node id="5314" label="MYH6"/>
      <node id="5313" label="ZSCAN29"/>
      <node id="5312" label="GPR65"/>
      <node id="5311" label="MDH1B"/>
      <node id="5310" label="ATRAID"/>
      <node id="5309" label="IRF1"/>
      <node id="5308" label="ZNF148"/>
      <node id="5307" label="ANKZF1"/>
      <node id="5306" label="DCAF13"/>
      <node id="5305" label="ZNF207"/>
      <node id="5304" label="TACC1"/>
      <node id="5303" label="FHL3"/>
      <node id="5302" label="CAMKV"/>
      <node id="5301" label="TACO1"/>
      <node id="5300" label="FYTTD1"/>
      <node id="5299" label="CLIC3"/>
      <node id="5298" label="CTBS"/>
      <node id="5297" label="TBC1D15"/>
      <node id="5296" label="DAAM2"/>
      <node id="5295" label="RPL34"/>
      <node id="5294" label="COG2"/>
      <node id="5293" label="KCTD18"/>
      <node id="5292" label="RTN4IP1"/>
      <node id="5291" label="CPSF6"/>
      <node id="5290" label="KIF2A"/>
      <node id="5289" label="CTDSPL"/>
      <node id="5288" label="ELOVL7"/>
      <node id="5287" label="HRG"/>
      <node id="5286" label="ASTE1"/>
      <node id="5285" label="ANKRD23"/>
      <node id="5284" label="DNAAF1"/>
      <node id="5283" label="TMEM47"/>
      <node id="5282" label="PGM2L1"/>
      <node id="5281" label="N4BP2L1"/>
      <node id="5280" label="ATG4D"/>
      <node id="5279" label="CORO1A"/>
      <node id="5278" label="MLEC"/>
      <node id="5277" label="GFPT1"/>
      <node id="5276" label="NDUFAF1"/>
      <node id="5275" label="POLR3K"/>
      <node id="5274" label="MSR1"/>
      <node id="5273" label="SHROOM4"/>
      <node id="5272" label="KRT83"/>
      <node id="5271" label="KCNG1"/>
      <node id="5270" label="TCN1"/>
      <node id="5269" label="SYTL4"/>
      <node id="5268" label="CREB3L1"/>
      <node id="5267" label="DRAP1"/>
      <node id="5266" label="TIMP3"/>
      <node id="5265" label="MARCO"/>
      <node id="5264" label="SCO1"/>
      <node id="5263" label="CCDC135"/>
      <node id="5262" label="MCIDAS"/>
      <node id="5261" label="TTC39C"/>
      <node id="5260" label="CENPN"/>
      <node id="5259" label="LSMD1"/>
      <node id="5258" label="PCNXL3"/>
      <node id="5257" label="RMDN3"/>
      <node id="5256" label="UBE3D"/>
      <node id="5255" label="CYB5D2"/>
      <node id="5254" label="TMEM86A"/>
      <node id="5253" label="NLRP7"/>
      <node id="5252" label="FAM13C"/>
      <node id="5251" label="RP11-861L17.3"/>
      <node id="5250" label="GMPPB"/>
      <node id="5249" label="RGS6"/>
      <node id="5248" label="GPR133"/>
      <node id="5247" label="EFCC1"/>
      <node id="5246" label="HES4"/>
      <node id="5245" label="PRRT1"/>
      <node id="5244" label="CACFD1"/>
      <node id="5243" label="AC117395.1"/>
      <node id="5242" label="FASN"/>
      <node id="5241" label="FAM162B"/>
      <node id="5240" label="TCTEX1D1"/>
      <node id="5239" label="SIRT1"/>
      <node id="5238" label="LIMK1"/>
      <node id="5237" label="ACTR1A"/>
      <node id="5236" label="ZBTB39"/>
      <node id="5235" label="CHN1"/>
      <node id="5234" label="RMI2"/>
      <node id="5233" label="BDH2"/>
      <node id="5232" label="FHAD1"/>
      <node id="5231" label="CEP78"/>
      <node id="5230" label="ROR1"/>
      <node id="5229" label="DPP3"/>
      <node id="5228" label="OPCML"/>
      <node id="5227" label="RAVER2"/>
      <node id="5226" label="AFP"/>
      <node id="5225" label="RPS10"/>
      <node id="5224" label="CETP"/>
      <node id="5223" label="GLT8D1"/>
      <node id="5222" label="CALML5"/>
      <node id="5221" label="HLA-DMB"/>
      <node id="5220" label="PFKFB4"/>
      <node id="5219" label="ARHGAP30"/>
      <node id="5218" label="HCLS1"/>
      <node id="5217" label="CNKSR1"/>
      <node id="5216" label="WBP11"/>
      <node id="5215" label="CHI3L2"/>
      <node id="5214" label="CNKSR3"/>
      <node id="5213" label="POLR3H"/>
      <node id="5212" label="PNKD"/>
      <node id="5211" label="NEK6"/>
      <node id="5210" label="FAM72D"/>
      <node id="5209" label="MYADM"/>
      <node id="5208" label="PCDH9"/>
      <node id="5207" label="PTGES3"/>
      <node id="5206" label="TIMM8A"/>
      <node id="5205" label="HAX1"/>
      <node id="5204" label="DDX18"/>
      <node id="5203" label="ASB8"/>
      <node id="5202" label="DNMT1"/>
      <node id="5201" label="PRAM1"/>
      <node id="5200" label="EXOSC7"/>
      <node id="5199" label="DUSP8"/>
      <node id="5198" label="GRAMD1A"/>
      <node id="5197" label="PHF2"/>
      <node id="5196" label="QSOX1"/>
      <node id="5195" label="S100A10"/>
      <node id="5194" label="BRCC3"/>
      <node id="5193" label="NR2F6"/>
      <node id="5192" label="IFT46"/>
      <node id="5191" label="SERPINB2"/>
      <node id="5190" label="KAT2A"/>
      <node id="5189" label="MYO15B"/>
      <node id="5188" label="CREB3L3"/>
      <node id="5187" label="SLC18A3"/>
      <node id="5186" label="TDRKH"/>
      <node id="5185" label="PAGE5"/>
      <node id="5184" label="SIPA1"/>
      <node id="5183" label="PPAPDC2"/>
      <node id="5182" label="CTBP1"/>
      <node id="5181" label="KRT8"/>
      <node id="5180" label="FBN2"/>
      <node id="5179" label="ICAM2"/>
      <node id="5178" label="MCM5"/>
      <node id="5177" label="PSMD7"/>
      <node id="5176" label="KCNH1"/>
      <node id="5175" label="NDRG2"/>
      <node id="5174" label="GGCT"/>
      <node id="5173" label="DARS2"/>
      <node id="5172" label="DMRT3"/>
      <node id="5171" label="CD63"/>
      <node id="5170" label="XPNPEP3"/>
      <node id="5169" label="KIAA0408"/>
      <node id="5168" label="FCGR1A"/>
      <node id="5167" label="CLSTN1"/>
      <node id="5166" label="TGM1"/>
      <node id="5165" label="ZBED6CL"/>
      <node id="5164" label="CD300A"/>
      <node id="5163" label="KARS"/>
      <node id="5162" label="CCDC114"/>
      <node id="5161" label="ZRANB1"/>
      <node id="5160" label="VARS"/>
      <node id="5159" label="IPO5"/>
      <node id="5158" label="TRIM24"/>
      <node id="5157" label="LILRB5"/>
      <node id="5156" label="TAP1"/>
      <node id="5155" label="TARS2"/>
      <node id="5154" label="PARK7"/>
      <node id="5153" label="ARAP3"/>
      <node id="5152" label="ATP6V1F"/>
      <node id="5151" label="CLIC4"/>
      <node id="5150" label="VWC2"/>
      <node id="5149" label="VIPR1"/>
      <node id="5148" label="SLC25A39"/>
      <node id="5147" label="TMTC3"/>
      <node id="5146" label="VEZT"/>
      <node id="5145" label="PSMD14"/>
      <node id="5144" label="DNAJC28"/>
      <node id="5143" label="BCS1L"/>
      <node id="5142" label="CDC5L"/>
      <node id="5141" label="PFKL"/>
      <node id="5140" label="ROGDI"/>
      <node id="5139" label="VDR"/>
      <node id="5138" label="CNOT11"/>
      <node id="5137" label="ZFP64"/>
      <node id="5136" label="ABAT"/>
      <node id="5135" label="LZTS2"/>
      <node id="5134" label="CAMSAP3"/>
      <node id="5133" label="CHRM5"/>
      <node id="5132" label="COL9A1"/>
      <node id="5131" label="GATAD2A"/>
      <node id="5130" label="DSCR3"/>
      <node id="5129" label="IL18BP"/>
      <node id="5128" label="C14orf39"/>
      <node id="5127" label="DBI"/>
      <node id="5126" label="SCAMP2"/>
      <node id="5125" label="MTA3"/>
      <node id="5124" label="MAEL"/>
      <node id="5123" label="NIPAL2"/>
      <node id="5122" label="STK33"/>
      <node id="5121" label="ADAM19"/>
      <node id="5120" label="SMIM8"/>
      <node id="5119" label="USP12"/>
      <node id="5118" label="GARS"/>
      <node id="5117" label="DENND5B"/>
      <node id="5116" label="TMEM201"/>
      <node id="5115" label="TRAIP"/>
      <node id="5114" label="PIGM"/>
      <node id="5113" label="FOXN4"/>
      <node id="5112" label="TREM1"/>
      <node id="5111" label="WNT2B"/>
      <node id="5110" label="DYSF"/>
      <node id="5109" label="CARD16"/>
      <node id="5108" label="ZC3H7A"/>
      <node id="5107" label="EIF4G1"/>
      <node id="5106" label="TET3"/>
      <node id="5105" label="CAPS"/>
      <node id="5104" label="SLC9A4"/>
      <node id="5103" label="DAZL"/>
      <node id="5102" label="SCN9A"/>
      <node id="5101" label="KCTD3"/>
      <node id="5100" label="PSG5"/>
      <node id="5099" label="CFB"/>
      <node id="5098" label="PNPT1"/>
      <node id="5097" label="ISY1"/>
      <node id="5096" label="TAOK1"/>
      <node id="5095" label="PIF1"/>
      <node id="5094" label="RPL24"/>
      <node id="5093" label="MPPED2"/>
      <node id="5092" label="WASF1"/>
      <node id="5091" label="FAM103A1"/>
      <node id="5090" label="SST"/>
      <node id="5089" label="RMI1"/>
      <node id="5088" label="ATAD2B"/>
      <node id="5087" label="ASPN"/>
      <node id="5086" label="PRKG1"/>
      <node id="5085" label="PLK4"/>
      <node id="5084" label="CLTCL1"/>
      <node id="5083" label="GAST"/>
      <node id="5082" label="RMND5A"/>
      <node id="5081" label="TMEM171"/>
      <node id="5080" label="GALNT12"/>
      <node id="5079" label="MMAB"/>
      <node id="5078" label="MRPS22"/>
      <node id="5077" label="FAM222B"/>
      <node id="5076" label="SLA"/>
      <node id="5075" label="DNAJC19"/>
      <node id="5074" label="ESCO2"/>
      <node id="5073" label="ADAM20"/>
      <node id="5072" label="ALDH3A1"/>
      <node id="5071" label="FABP7"/>
      <node id="5070" label="SLC35C1"/>
      <node id="5069" label="EHD2"/>
      <node id="5068" label="TMOD1"/>
      <node id="5067" label="CRB2"/>
      <node id="5066" label="TMEM194A"/>
      <node id="5065" label="ARCN1"/>
      <node id="5064" label="FAM107B"/>
      <node id="5063" label="SGMS2"/>
      <node id="5062" label="PAX9"/>
      <node id="5061" label="CKAP2"/>
      <node id="5060" label="ALOX5AP"/>
      <node id="5059" label="CSRNP1"/>
      <node id="5058" label="TGFB2"/>
      <node id="5057" label="CRMP1"/>
      <node id="5056" label="CITED2"/>
      <node id="5055" label="CALHM1"/>
      <node id="5054" label="GRHL2"/>
      <node id="5053" label="HEPHL1"/>
      <node id="5052" label="SIX4"/>
      <node id="5051" label="TNS3"/>
      <node id="5050" label="ZNF217"/>
      <node id="5049" label="CD151"/>
      <node id="5048" label="TACC2"/>
      <node id="5047" label="ZC3H8"/>
      <node id="5046" label="RABL2B"/>
      <node id="5045" label="SLC29A2"/>
      <node id="5044" label="TFAP2C"/>
      <node id="5043" label="ADD3"/>
      <node id="5042" label="EIF2B3"/>
      <node id="5041" label="AC040160.1"/>
      <node id="5040" label="RPL35A"/>
      <node id="5039" label="MAL2"/>
      <node id="5038" label="APRT"/>
      <node id="5037" label="PLCL1"/>
      <node id="5036" label="PLCB1"/>
      <node id="5035" label="WDR12"/>
      <node id="5034" label="ELK4"/>
      <node id="5033" label="XRN1"/>
      <node id="5032" label="C1QTNF7"/>
      <node id="5031" label="ATP1B3"/>
      <node id="5030" label="PPP1R14B"/>
      <node id="5029" label="B4GALT2"/>
      <node id="5028" label="MRPS16"/>
      <node id="5027" label="ZNF692"/>
      <node id="5026" label="ATG16L2"/>
      <node id="5025" label="TBL1XR1"/>
      <node id="5024" label="PCCB"/>
      <node id="5023" label="STT3A"/>
      <node id="5022" label="AKAP1"/>
      <node id="5021" label="RNH1"/>
      <node id="5020" label="TLCD1"/>
      <node id="5019" label="ALG5"/>
      <node id="5018" label="RNF38"/>
      <node id="5017" label="SETD5"/>
      <node id="5016" label="LIFR"/>
      <node id="5015" label="PTPRB"/>
      <node id="5014" label="TMEM231"/>
      <node id="5013" label="ARHGEF10L"/>
      <node id="5012" label="PNPLA6"/>
      <node id="5011" label="TIMP2"/>
      <node id="5010" label="PTGIR"/>
      <node id="5009" label="HAPLN3"/>
      <node id="5008" label="TRUB2"/>
      <node id="5007" label="CCDC19"/>
      <node id="5006" label="TSPAN9"/>
      <node id="5005" label="LTBP4"/>
      <node id="5004" label="FEN1"/>
      <node id="5003" label="WHSC1L1"/>
      <node id="5002" label="ZNF227"/>
      <node id="5001" label="CCDC170"/>
      <node id="5000" label="GUCY1A2"/>
      <node id="4999" label="SERINC3"/>
      <node id="4998" label="ZNF841"/>
      <node id="4997" label="PTK2"/>
      <node id="4996" label="ATIC"/>
      <node id="4995" label="CDK4"/>
      <node id="4994" label="ASL"/>
      <node id="4993" label="NIPSNAP1"/>
      <node id="4992" label="MRTO4"/>
      <node id="4991" label="SIGLEC7"/>
      <node id="4990" label="NLN"/>
      <node id="4989" label="TIGD4"/>
      <node id="4988" label="WFS1"/>
      <node id="4987" label="WNT9A"/>
      <node id="4986" label="TXNRD2"/>
      <node id="4985" label="S100A11"/>
      <node id="4984" label="SLC35D3"/>
      <node id="4983" label="SUN1"/>
      <node id="4982" label="STARD9"/>
      <node id="4981" label="NCAPG2"/>
      <node id="4980" label="PDSS2"/>
      <node id="4979" label="TIMM17A"/>
      <node id="4978" label="C16orf93"/>
      <node id="4977" label="PARN"/>
      <node id="4976" label="WNT7B"/>
      <node id="4975" label="FUT1"/>
      <node id="4974" label="VCAM1"/>
      <node id="4973" label="ISLR"/>
      <node id="4972" label="TMED9"/>
      <node id="4971" label="HSPA5"/>
      <node id="4970" label="HSPD1"/>
      <node id="4969" label="LSR"/>
      <node id="4968" label="GNL3"/>
      <node id="4967" label="PKP3"/>
      <node id="4966" label="RPH3AL"/>
      <node id="4965" label="ARID2"/>
      <node id="4964" label="BLVRB"/>
      <node id="4963" label="CENPK"/>
      <node id="4962" label="CKAP4"/>
      <node id="4961" label="IDH2"/>
      <node id="4960" label="UBE2H"/>
      <node id="4959" label="BRAF"/>
      <node id="4958" label="USP35"/>
      <node id="4957" label="RSF1"/>
      <node id="4956" label="AAR2"/>
      <node id="4955" label="LRRN3"/>
      <node id="4954" label="FOXA2"/>
      <node id="4953" label="TSPAN3"/>
      <node id="4952" label="NIPBL"/>
      <node id="4951" label="ARHGAP21"/>
      <node id="4950" label="ARX"/>
      <node id="4949" label="ELOF1"/>
      <node id="4948" label="ST3GAL2"/>
      <node id="4947" label="BTNL9"/>
      <node id="4946" label="HIF3A"/>
      <node id="4945" label="SMAD5"/>
      <node id="4944" label="DOLPP1"/>
      <node id="4943" label="YES1"/>
      <node id="4942" label="RIBC1"/>
      <node id="4941" label="PTAFR"/>
      <node id="4940" label="BNIP3"/>
      <node id="4939" label="TBX2"/>
      <node id="4938" label="PARD6B"/>
      <node id="4937" label="C10orf95"/>
      <node id="4936" label="MMACHC"/>
      <node id="4935" label="CCNF"/>
      <node id="4934" label="SMCHD1"/>
      <node id="4933" label="SRRM1"/>
      <node id="4932" label="RPP40"/>
      <node id="4931" label="IMP4"/>
      <node id="4930" label="LRRC69"/>
      <node id="4929" label="CTNNAL1"/>
      <node id="4928" label="MTF2"/>
      <node id="4927" label="ZFR"/>
      <node id="4926" label="GLT8D2"/>
      <node id="4925" label="ANTXR1"/>
      <node id="4924" label="SCUBE1"/>
      <node id="4923" label="PHACTR2"/>
      <node id="4922" label="FUBP1"/>
      <node id="4921" label="MARCKS"/>
      <node id="4920" label="PDE5A"/>
      <node id="4919" label="DTYMK"/>
      <node id="4918" label="NUDT16"/>
      <node id="4917" label="NRP1"/>
      <node id="4916" label="CLN3"/>
      <node id="4915" label="BSPRY"/>
      <node id="4914" label="PRSS16"/>
      <node id="4913" label="MRPL24"/>
      <node id="4912" label="USP47"/>
      <node id="4911" label="PTGDS"/>
      <node id="4910" label="HNRNPC"/>
      <node id="4909" label="RPN2"/>
      <node id="4908" label="SLC25A24"/>
      <node id="4907" label="PRTFDC1"/>
      <node id="4906" label="SLC25A16"/>
      <node id="4905" label="KPNA2"/>
      <node id="4904" label="IPO4"/>
      <node id="4903" label="TXNDC17"/>
      <node id="4902" label="PLEKHA1"/>
      <node id="4901" label="C1orf198"/>
      <node id="4900" label="MED13"/>
      <node id="4899" label="KLRF1"/>
      <node id="4898" label="S1PR5"/>
      <node id="4897" label="FAM86A"/>
      <node id="4896" label="BMPR2"/>
      <node id="4895" label="CXADR"/>
      <node id="4894" label="NRCAM"/>
      <node id="4893" label="TMEM208"/>
      <node id="4892" label="ZEB1"/>
      <node id="4891" label="USP9X"/>
      <node id="4890" label="FGF7"/>
      <node id="4889" label="SLC27A3"/>
      <node id="4888" label="STAT5B"/>
      <node id="4887" label="WDR4"/>
      <node id="4886" label="ARHGEF39"/>
      <node id="4885" label="TPD52"/>
      <node id="4884" label="CTNNBIP1"/>
      <node id="4883" label="AGBL2"/>
      <node id="4882" label="CRTC2"/>
      <node id="4881" label="EFCAB10"/>
      <node id="4880" label="SBF2"/>
      <node id="4879" label="VPS18"/>
      <node id="4878" label="CCDC141"/>
      <node id="4877" label="CCDC102B"/>
      <node id="4876" label="HDGF"/>
      <node id="4875" label="STARD7"/>
      <node id="4874" label="MAT1A"/>
      <node id="4873" label="SYNJ2"/>
      <node id="4872" label="PKP4"/>
      <node id="4871" label="PRDX4"/>
      <node id="4870" label="NCMAP"/>
      <node id="4869" label="ACACA"/>
      <node id="4868" label="COA4"/>
      <node id="4867" label="ST6GALNAC4"/>
      <node id="4866" label="MIS18A"/>
      <node id="4865" label="TTC23L"/>
      <node id="4864" label="PCYT2"/>
      <node id="4863" label="CAMK2N1"/>
      <node id="4862" label="TNP1"/>
      <node id="4861" label="CCDC94"/>
      <node id="4860" label="DENND3"/>
      <node id="4859" label="LMBR1L"/>
      <node id="4858" label="IL33"/>
      <node id="4857" label="ISYNA1"/>
      <node id="4856" label="PSMD12"/>
      <node id="4855" label="C6"/>
      <node id="4854" label="SIGLEC5"/>
      <node id="4853" label="SPESP1"/>
      <node id="4852" label="LRRC73"/>
      <node id="4851" label="PCK2"/>
      <node id="4850" label="STAC"/>
      <node id="4849" label="GPD1"/>
      <node id="4848" label="ATP6V0E1"/>
      <node id="4847" label="CDCA4"/>
      <node id="4846" label="NPEPPS"/>
      <node id="4845" label="C19orf54"/>
      <node id="4844" label="VWA3B"/>
      <node id="4843" label="DPCR1"/>
      <node id="4842" label="SCN1A"/>
      <node id="4841" label="C11orf48"/>
      <node id="4840" label="NME1-NME2"/>
      <node id="4839" label="MIF"/>
      <node id="4838" label="CANX"/>
      <node id="4837" label="LAMA4"/>
      <node id="4836" label="RMDN2"/>
      <node id="4835" label="ADORA2A"/>
      <node id="4834" label="OSTM1"/>
      <node id="4833" label="UBAP2L"/>
      <node id="4832" label="MANF"/>
      <node id="4831" label="ANO6"/>
      <node id="4830" label="NHLRC4"/>
      <node id="4829" label="RANBP1"/>
      <node id="4828" label="NME9"/>
      <node id="4827" label="MEF2BNB"/>
      <node id="4826" label="CCDC96"/>
      <node id="4825" label="RABL2A"/>
      <node id="4824" label="TCF4"/>
      <node id="4823" label="ABCB6"/>
      <node id="4822" label="METTL7B"/>
      <node id="4821" label="PSMC4"/>
      <node id="4820" label="SLIT3"/>
      <node id="4819" label="DYRK2"/>
      <node id="4818" label="ATF2"/>
      <node id="4817" label="CHAF1B"/>
      <node id="4816" label="C21orf33"/>
      <node id="4815" label="RENBP"/>
      <node id="4814" label="TMC6"/>
      <node id="4813" label="TONSL"/>
      <node id="4812" label="MORN5"/>
      <node id="4811" label="CTXN1"/>
      <node id="4810" label="GOLT1A"/>
      <node id="4809" label="PLCE1"/>
      <node id="4808" label="FBXW7"/>
      <node id="4807" label="LIX1L"/>
      <node id="4806" label="ATP5G1"/>
      <node id="4805" label="LMNB1"/>
      <node id="4804" label="CD300E"/>
      <node id="4803" label="DHX34"/>
      <node id="4802" label="BPNT1"/>
      <node id="4801" label="LCA5L"/>
      <node id="4800" label="B3GNT7"/>
      <node id="4799" label="KDELR2"/>
      <node id="4798" label="NIF3L1"/>
      <node id="4797" label="PPP1R32"/>
      <node id="4796" label="NFIB"/>
      <node id="4795" label="PARD3B"/>
      <node id="4794" label="C21orf59"/>
      <node id="4793" label="PTPMT1"/>
      <node id="4792" label="DHTKD1"/>
      <node id="4791" label="STK10"/>
      <node id="4790" label="EIF3I"/>
      <node id="4789" label="SGPP2"/>
      <node id="4788" label="CCDC153"/>
      <node id="4787" label="NME6"/>
      <node id="4786" label="PEPD"/>
      <node id="4785" label="ST14"/>
      <node id="4784" label="MRPL35"/>
      <node id="4783" label="NPAT"/>
      <node id="4782" label="SLC38A7"/>
      <node id="4781" label="MACROD2"/>
      <node id="4780" label="INPP4B"/>
      <node id="4779" label="CDHR4"/>
      <node id="4778" label="SSR3"/>
      <node id="4777" label="TMEM165"/>
      <node id="4776" label="TP53I3"/>
      <node id="4775" label="SYS1"/>
      <node id="4774" label="SIAH3"/>
      <node id="4773" label="PARP1"/>
      <node id="4772" label="ETS1"/>
      <node id="4771" label="EBP"/>
      <node id="4770" label="FABP6"/>
      <node id="4769" label="TEKT3"/>
      <node id="4768" label="NOC2L"/>
      <node id="4767" label="APEH"/>
      <node id="4766" label="BLOC1S1"/>
      <node id="4765" label="B3GALT6"/>
      <node id="4764" label="CCDC13"/>
      <node id="4763" label="ARMC6"/>
      <node id="4762" label="HMGA1"/>
      <node id="4761" label="MARCKSL1"/>
      <node id="4760" label="FBXL7"/>
      <node id="4759" label="TSNAXIP1"/>
      <node id="4758" label="PALLD"/>
      <node id="4757" label="PUM2"/>
      <node id="4756" label="FMNL1"/>
      <node id="4755" label="FLRT3"/>
      <node id="4754" label="YIPF2"/>
      <node id="4753" label="B9D2"/>
      <node id="4752" label="PACS1"/>
      <node id="4751" label="C9orf9"/>
      <node id="4750" label="NSUN5"/>
      <node id="4749" label="TUBB1"/>
      <node id="4748" label="PF4"/>
      <node id="4747" label="HECW2"/>
      <node id="4746" label="LPHN2"/>
      <node id="4745" label="RHBDF1"/>
      <node id="4744" label="GNPDA1"/>
      <node id="4743" label="B9D1"/>
      <node id="4742" label="KCNS3"/>
      <node id="4741" label="SCN4B"/>
      <node id="4740" label="DCPS"/>
      <node id="4739" label="UBR5"/>
      <node id="4738" label="ATAD3C"/>
      <node id="4737" label="CAMSAP2"/>
      <node id="4736" label="EIF6"/>
      <node id="4735" label="BYSL"/>
      <node id="4734" label="NBL1"/>
      <node id="4733" label="UNC5C"/>
      <node id="4732" label="SERPINF2"/>
      <node id="4731" label="OSTC"/>
      <node id="4730" label="FAM203A"/>
      <node id="4729" label="TACC3"/>
      <node id="4728" label="PELI2"/>
      <node id="4727" label="MORN3"/>
      <node id="4726" label="CCDC71"/>
      <node id="4725" label="CCDC157"/>
      <node id="4724" label="UACA"/>
      <node id="4723" label="TMEM245"/>
      <node id="4722" label="FARP2"/>
      <node id="4721" label="EIF5A"/>
      <node id="4720" label="CDS1"/>
      <node id="4719" label="CAB39L"/>
      <node id="4718" label="CALD1"/>
      <node id="4717" label="POLR2C"/>
      <node id="4716" label="NUBP1"/>
      <node id="4715" label="TTC34"/>
      <node id="4714" label="PAFAH1B3"/>
      <node id="4713" label="TEAD2"/>
      <node id="4712" label="MAOB"/>
      <node id="4711" label="MRPL15"/>
      <node id="4710" label="TBRG4"/>
      <node id="4709" label="KNTC1"/>
      <node id="4708" label="SRP72"/>
      <node id="4707" label="TSHZ3"/>
      <node id="4706" label="AHCY"/>
      <node id="4705" label="GSDMB"/>
      <node id="4704" label="IFRD1"/>
      <node id="4703" label="BDH1"/>
      <node id="4702" label="ANKEF1"/>
      <node id="4701" label="LUC7L3"/>
      <node id="4700" label="ZNF273"/>
      <node id="4699" label="GSTO2"/>
      <node id="4698" label="SYNCRIP"/>
      <node id="4697" label="KLHL5"/>
      <node id="4696" label="RRP9"/>
      <node id="4695" label="CRIM1"/>
      <node id="4694" label="YIF1A"/>
      <node id="4693" label="USP44"/>
      <node id="4692" label="ARHGEF12"/>
      <node id="4691" label="OR2B11"/>
      <node id="4690" label="L34079.2"/>
      <node id="4689" label="TMED3"/>
      <node id="4688" label="DNAJC7"/>
      <node id="4687" label="CSTF2"/>
      <node id="4686" label="ITM2C"/>
      <node id="4685" label="ITIH5"/>
      <node id="4684" label="SPARCL1"/>
      <node id="4683" label="MAMDC2"/>
      <node id="4682" label="FAM118B"/>
      <node id="4681" label="ARHGAP35"/>
      <node id="4680" label="DCAF11"/>
      <node id="4679" label="PALM"/>
      <node id="4678" label="FAM179A"/>
      <node id="4677" label="KIAA0040"/>
      <node id="4676" label="SLC46A1"/>
      <node id="4675" label="ZSWIM7"/>
      <node id="4674" label="CABIN1"/>
      <node id="4673" label="GLRX3"/>
      <node id="4672" label="LEPR"/>
      <node id="4671" label="TMEM27"/>
      <node id="4670" label="GRASP"/>
      <node id="4669" label="YPEL5"/>
      <node id="4668" label="TMEM232"/>
      <node id="4667" label="DPCD"/>
      <node id="4666" label="PLIN5"/>
      <node id="4665" label="MED18"/>
      <node id="4664" label="ITGBL1"/>
      <node id="4663" label="CCDC86"/>
      <node id="4662" label="DENND6B"/>
      <node id="4661" label="TNRC6B"/>
      <node id="4660" label="COPE"/>
      <node id="4659" label="HARBI1"/>
      <node id="4658" label="TMEM186"/>
      <node id="4657" label="SMG8"/>
      <node id="4656" label="TBC1D2"/>
      <node id="4655" label="NAT10"/>
      <node id="4654" label="GINS4"/>
      <node id="4653" label="PTPRE"/>
      <node id="4652" label="UNC5D"/>
      <node id="4651" label="DPYSL3"/>
      <node id="4650" label="PDCD11"/>
      <node id="4649" label="PEX11G"/>
      <node id="4648" label="PKNOX2"/>
      <node id="4647" label="FBXL6"/>
      <node id="4646" label="ZMYM5"/>
      <node id="4645" label="AK8"/>
      <node id="4644" label="LRCH1"/>
      <node id="4643" label="RNF44"/>
      <node id="4642" label="MANEAL"/>
      <node id="4641" label="FAM171B"/>
      <node id="4640" label="RAB6A"/>
      <node id="4639" label="NIPA2"/>
      <node id="4638" label="ARHGAP26"/>
      <node id="4637" label="DCTPP1"/>
      <node id="4636" label="SRSF1"/>
      <node id="4635" label="SEC61A1"/>
      <node id="4634" label="AC092964.2"/>
      <node id="4633" label="DDX28"/>
      <node id="4632" label="WDHD1"/>
      <node id="4631" label="HNRNPAB"/>
      <node id="4630" label="NAPB"/>
      <node id="4629" label="C17orf72"/>
      <node id="4628" label="TROVE2"/>
      <node id="4627" label="ARHGEF19"/>
      <node id="4626" label="RNASE4"/>
      <node id="4625" label="FUZ"/>
      <node id="4624" label="SEC61B"/>
      <node id="4623" label="RAD21"/>
      <node id="4622" label="ZSWIM5"/>
      <node id="4621" label="ECM2"/>
      <node id="4620" label="EGFR"/>
      <node id="4619" label="ARSE"/>
      <node id="4618" label="CYTH3"/>
      <node id="4617" label="AACS"/>
      <node id="4616" label="RPUSD1"/>
      <node id="4615" label="ACAP3"/>
      <node id="4614" label="TSTA3"/>
      <node id="4613" label="SSR1"/>
      <node id="4612" label="STRN"/>
      <node id="4611" label="NLE1"/>
      <node id="4610" label="PDE8A"/>
      <node id="4609" label="DONSON"/>
      <node id="4608" label="DLG4"/>
      <node id="4607" label="IKZF2"/>
      <node id="4606" label="AP5S1"/>
      <node id="4605" label="CLDN4"/>
      <node id="4604" label="SURF4"/>
      <node id="4603" label="MRPS15"/>
      <node id="4602" label="EDEM1"/>
      <node id="4601" label="ARHGAP29"/>
      <node id="4600" label="CNOT4"/>
      <node id="4599" label="MAL"/>
      <node id="4598" label="B3GALT4"/>
      <node id="4597" label="P4HA1"/>
      <node id="4596" label="NKG7"/>
      <node id="4595" label="DHDDS"/>
      <node id="4594" label="CA12"/>
      <node id="4593" label="LARS"/>
      <node id="4592" label="SLC35B2"/>
      <node id="4591" label="RABEP2"/>
      <node id="4590" label="SCAMP4"/>
      <node id="4589" label="LAMTOR1"/>
      <node id="4588" label="CFI"/>
      <node id="4587" label="TIMM23"/>
      <node id="4586" label="APEX1"/>
      <node id="4585" label="ADSL"/>
      <node id="4584" label="FARSA"/>
      <node id="4583" label="CNDP2"/>
      <node id="4582" label="MRPS33"/>
      <node id="4581" label="MFSD5"/>
      <node id="4580" label="ATAD3A"/>
      <node id="4579" label="BOP1"/>
      <node id="4578" label="ADAMTS10"/>
      <node id="4577" label="FBP1"/>
      <node id="4576" label="PGBD2"/>
      <node id="4575" label="YY1AP1"/>
      <node id="4574" label="POLE2"/>
      <node id="4573" label="TMEM200B"/>
      <node id="4572" label="GANC"/>
      <node id="4571" label="MARCH7"/>
      <node id="4570" label="SIL1"/>
      <node id="4569" label="GPATCH4"/>
      <node id="4568" label="RAPGEF5"/>
      <node id="4567" label="WWTR1"/>
      <node id="4566" label="GPR34"/>
      <node id="4565" label="C9orf114"/>
      <node id="4564" label="GALE"/>
      <node id="4563" label="GNPNAT1"/>
      <node id="4562" label="NOL10"/>
      <node id="4561" label="RERG"/>
      <node id="4560" label="PDGFRB"/>
      <node id="4559" label="SIRT7"/>
      <node id="4558" label="NDE1"/>
      <node id="4557" label="GBP4"/>
      <node id="4556" label="PIFO"/>
      <node id="4555" label="RPS8"/>
      <node id="4554" label="DHX40"/>
      <node id="4553" label="SNF8"/>
      <node id="4552" label="GEMIN7"/>
      <node id="4551" label="NSF"/>
      <node id="4550" label="TMEM115"/>
      <node id="4549" label="OR3A2"/>
      <node id="4548" label="LDHAL6A"/>
      <node id="4547" label="PRELID1"/>
      <node id="4546" label="UCHL3"/>
      <node id="4545" label="CHD1"/>
      <node id="4544" label="HADH"/>
      <node id="4543" label="EMC3"/>
      <node id="4542" label="HYOU1"/>
      <node id="4541" label="MAP4"/>
      <node id="4540" label="KAT2B"/>
      <node id="4539" label="TMPO"/>
      <node id="4538" label="PZP"/>
      <node id="4537" label="IRAK1"/>
      <node id="4536" label="MCTS1"/>
      <node id="4535" label="VGLL4"/>
      <node id="4534" label="MRPL52"/>
      <node id="4533" label="ATAD2"/>
      <node id="4532" label="ICT1"/>
      <node id="4531" label="ZC3HC1"/>
      <node id="4530" label="CLDN3"/>
      <node id="4529" label="TMEM223"/>
      <node id="4528" label="DIAPH3"/>
      <node id="4527" label="GORASP2"/>
      <node id="4526" label="FREM2"/>
      <node id="4525" label="WDR78"/>
      <node id="4524" label="NPR3"/>
      <node id="4523" label="PSME2"/>
      <node id="4522" label="PITPNM3"/>
      <node id="4521" label="CYB5A"/>
      <node id="4520" label="TM9SF1"/>
      <node id="4519" label="PRMT5"/>
      <node id="4518" label="PPFIBP1"/>
      <node id="4517" label="MAD2L1BP"/>
      <node id="4516" label="FOLH1"/>
      <node id="4515" label="PFKP"/>
      <node id="4514" label="MEX3C"/>
      <node id="4513" label="SLC39A11"/>
      <node id="4512" label="MRPL4"/>
      <node id="4511" label="TPPP3"/>
      <node id="4510" label="ABHD11"/>
      <node id="4509" label="RNF43"/>
      <node id="4508" label="C19orf48"/>
      <node id="4507" label="ACY1"/>
      <node id="4506" label="CNPPD1"/>
      <node id="4505" label="CAPN3"/>
      <node id="4504" label="PABPC1L"/>
      <node id="4503" label="KIAA1522"/>
      <node id="4502" label="LPAR2"/>
      <node id="4501" label="RASA3"/>
      <node id="4500" label="POLR2H"/>
      <node id="4499" label="RP13-996F3.4"/>
      <node id="4498" label="SUB1"/>
      <node id="4497" label="PDE1C"/>
      <node id="4496" label="OLFML2A"/>
      <node id="4495" label="DDX42"/>
      <node id="4494" label="ZBTB10"/>
      <node id="4493" label="ABCF2"/>
      <node id="4492" label="SCIMP"/>
      <node id="4491" label="CNPY2"/>
      <node id="4490" label="C1orf115"/>
      <node id="4489" label="NEK7"/>
      <node id="4488" label="BOLA2B"/>
      <node id="4487" label="GYPE"/>
      <node id="4486" label="RP11-664D7.4"/>
      <node id="4485" label="GLB1"/>
      <node id="4484" label="GOT1"/>
      <node id="4483" label="ABCC10"/>
      <node id="4482" label="NPM1"/>
      <node id="4481" label="TENC1"/>
      <node id="4480" label="PSD3"/>
      <node id="4479" label="SLC25A5"/>
      <node id="4478" label="STAU1"/>
      <node id="4477" label="METTL1"/>
      <node id="4476" label="CADPS2"/>
      <node id="4475" label="MRGBP"/>
      <node id="4474" label="APEX2"/>
      <node id="4473" label="XRCC3"/>
      <node id="4472" label="RAP1B"/>
      <node id="4471" label="BAIAP3"/>
      <node id="4470" label="SGIP1"/>
      <node id="4469" label="TARBP2"/>
      <node id="4468" label="PHLDB3"/>
      <node id="4467" label="ARMCX1"/>
      <node id="4466" label="SLC27A4"/>
      <node id="4465" label="PSMA5"/>
      <node id="4464" label="ARHGEF25"/>
      <node id="4463" label="C21orf91"/>
      <node id="4462" label="TMEM9B"/>
      <node id="4461" label="DKK3"/>
      <node id="4460" label="PKD2"/>
      <node id="4459" label="FANCG"/>
      <node id="4458" label="PLEKHH2"/>
      <node id="4457" label="DZANK1"/>
      <node id="4456" label="NME5"/>
      <node id="4455" label="OLA1"/>
      <node id="4454" label="SNAI1"/>
      <node id="4453" label="SSR2"/>
      <node id="4452" label="TTLL3"/>
      <node id="4451" label="ADCY4"/>
      <node id="4450" label="TBX19"/>
      <node id="4449" label="OCIAD2"/>
      <node id="4448" label="ZMYM2"/>
      <node id="4447" label="DENND2C"/>
      <node id="4446" label="FAM227A"/>
      <node id="4445" label="RSPH4A"/>
      <node id="4444" label="OTX1"/>
      <node id="4443" label="PRODH"/>
      <node id="4442" label="PGAM1"/>
      <node id="4441" label="CCDC146"/>
      <node id="4440" label="TEX264"/>
      <node id="4439" label="LRGUK"/>
      <node id="4438" label="MRPS7"/>
      <node id="4437" label="ABRA"/>
      <node id="4436" label="C9orf69"/>
      <node id="4435" label="PMM2"/>
      <node id="4434" label="DCUN1D4"/>
      <node id="4433" label="TCEAL7"/>
      <node id="4432" label="SUDS3"/>
      <node id="4431" label="ADAMTSL4"/>
      <node id="4430" label="EDNRA"/>
      <node id="4429" label="SLC35B1"/>
      <node id="4428" label="AIMP2"/>
      <node id="4427" label="EXOSC5"/>
      <node id="4426" label="WNK2"/>
      <node id="4425" label="FAM65A"/>
      <node id="4424" label="PPP1R12B"/>
      <node id="4423" label="DHRS7B"/>
      <node id="4422" label="CNP"/>
      <node id="4421" label="SLK"/>
      <node id="4420" label="ACSL4"/>
      <node id="4419" label="NRG3"/>
      <node id="4418" label="CC2D2A"/>
      <node id="4417" label="PA2G4"/>
      <node id="4416" label="FKBP3"/>
      <node id="4415" label="TIMP1"/>
      <node id="4414" label="TPI1"/>
      <node id="4413" label="CYTIP"/>
      <node id="4412" label="DPM2"/>
      <node id="4411" label="HEATR1"/>
      <node id="4410" label="EXOC6B"/>
      <node id="4409" label="HOXA1"/>
      <node id="4408" label="KCNT2"/>
      <node id="4407" label="RCCD1"/>
      <node id="4406" label="CENPH"/>
      <node id="4405" label="CDR2"/>
      <node id="4404" label="COLGALT1"/>
      <node id="4403" label="NPDC1"/>
      <node id="4402" label="BAZ1A"/>
      <node id="4401" label="TUBA1C"/>
      <node id="4400" label="PXMP2"/>
      <node id="4399" label="PSKH1"/>
      <node id="4398" label="EML1"/>
      <node id="4397" label="SMAD6"/>
      <node id="4396" label="USP27X"/>
      <node id="4395" label="EED"/>
      <node id="4394" label="LRRC56"/>
      <node id="4393" label="EXO5"/>
      <node id="4392" label="MCTP1"/>
      <node id="4391" label="MED13L"/>
      <node id="4390" label="FAP"/>
      <node id="4389" label="SCAMP3"/>
      <node id="4388" label="FAM63B"/>
      <node id="4387" label="KIAA1549"/>
      <node id="4386" label="QDPR"/>
      <node id="4385" label="PREB"/>
      <node id="4384" label="CDK17"/>
      <node id="4383" label="PDK1"/>
      <node id="4382" label="PAPOLA"/>
      <node id="4381" label="SDSL"/>
      <node id="4380" label="GSDMD"/>
      <node id="4379" label="LTBP3"/>
      <node id="4378" label="TMEM74B"/>
      <node id="4377" label="FAM49A"/>
      <node id="4376" label="SLC25A25"/>
      <node id="4375" label="KMT2E"/>
      <node id="4374" label="ARMC1"/>
      <node id="4373" label="ZNHIT3"/>
      <node id="4372" label="TET2"/>
      <node id="4371" label="UTP14A"/>
      <node id="4370" label="LRRC4B"/>
      <node id="4369" label="TTPAL"/>
      <node id="4368" label="PIGQ"/>
      <node id="4367" label="C1orf131"/>
      <node id="4366" label="ITGAV"/>
      <node id="4365" label="SPSB2"/>
      <node id="4364" label="ACO1"/>
      <node id="4363" label="KPNA1"/>
      <node id="4362" label="GPR84"/>
      <node id="4361" label="ADAMTSL3"/>
      <node id="4360" label="PLCG2"/>
      <node id="4359" label="ENDOG"/>
      <node id="4358" label="EXOSC1"/>
      <node id="4357" label="DNAJB11"/>
      <node id="4356" label="CCL28"/>
      <node id="4355" label="NEK8"/>
      <node id="4354" label="PPAT"/>
      <node id="4353" label="CHAC2"/>
      <node id="4352" label="KLC1"/>
      <node id="4351" label="ENAH"/>
      <node id="4350" label="PSMD11"/>
      <node id="4349" label="ZMYND11"/>
      <node id="4348" label="MRPL37"/>
      <node id="4347" label="ILDR1"/>
      <node id="4346" label="ZNF667"/>
      <node id="4345" label="GAN"/>
      <node id="4344" label="TWF2"/>
      <node id="4343" label="TNFSF10"/>
      <node id="4342" label="GTF2E1"/>
      <node id="4341" label="RUNX1T1"/>
      <node id="4340" label="POU2F3"/>
      <node id="4339" label="EGFL7"/>
      <node id="4338" label="KIAA0355"/>
      <node id="4337" label="TMEM147"/>
      <node id="4336" label="ERP29"/>
      <node id="4335" label="RB1CC1"/>
      <node id="4334" label="MRPS34"/>
      <node id="4333" label="SMARCA2"/>
      <node id="4332" label="EZH1"/>
      <node id="4331" label="IFT27"/>
      <node id="4330" label="ASPHD1"/>
      <node id="4329" label="ACSS2"/>
      <node id="4328" label="HIST2H2BF"/>
      <node id="4327" label="C1orf85"/>
      <node id="4326" label="ITCH"/>
      <node id="4325" label="DCAF16"/>
      <node id="4324" label="MID1IP1"/>
      <node id="4323" label="CBLB"/>
      <node id="4322" label="LCMT2"/>
      <node id="4321" label="CCDC167"/>
      <node id="4320" label="CYGB"/>
      <node id="4319" label="PRRG2"/>
      <node id="4318" label="MRVI1"/>
      <node id="4317" label="RASAL3"/>
      <node id="4316" label="RSPH10B"/>
      <node id="4315" label="TRO"/>
      <node id="4314" label="GPAA1"/>
      <node id="4313" label="PRAF2"/>
      <node id="4312" label="FGD3"/>
      <node id="4311" label="MED8"/>
      <node id="4310" label="MRPS35"/>
      <node id="4309" label="MDH2"/>
      <node id="4308" label="SNRPE"/>
      <node id="4307" label="UBLCP1"/>
      <node id="4306" label="ELMO1"/>
      <node id="4305" label="DOCK6"/>
      <node id="4304" label="TXNDC9"/>
      <node id="4303" label="NRTN"/>
      <node id="4302" label="KLHL12"/>
      <node id="4301" label="RAB24"/>
      <node id="4300" label="TMEM69"/>
      <node id="4299" label="SUOX"/>
      <node id="4298" label="ZXDC"/>
      <node id="4297" label="UCHL5"/>
      <node id="4296" label="KIFC2"/>
      <node id="4295" label="UGCG"/>
      <node id="4294" label="MXRA5"/>
      <node id="4293" label="RPF2"/>
      <node id="4292" label="KIAA1462"/>
      <node id="4291" label="KCNMB4"/>
      <node id="4290" label="ADRA2A"/>
      <node id="4289" label="TNFRSF10C"/>
      <node id="4288" label="GPRASP1"/>
      <node id="4287" label="SIGMAR1"/>
      <node id="4286" label="SLC1A4"/>
      <node id="4285" label="FOXO4"/>
      <node id="4284" label="PPP1CA"/>
      <node id="4283" label="ORMDL2"/>
      <node id="4282" label="MARCH6"/>
      <node id="4281" label="ENTPD4"/>
      <node id="4280" label="MCL1"/>
      <node id="4279" label="INPP5K"/>
      <node id="4278" label="PLCG1"/>
      <node id="4277" label="PHF1"/>
      <node id="4276" label="NECAB3"/>
      <node id="4275" label="SLC35A4"/>
      <node id="4274" label="ADAMTS7"/>
      <node id="4273" label="RANGRF"/>
      <node id="4272" label="TMEM136"/>
      <node id="4271" label="ITGAX"/>
      <node id="4270" label="BRWD3"/>
      <node id="4269" label="PHF19"/>
      <node id="4268" label="PAQR4"/>
      <node id="4267" label="COBL"/>
      <node id="4266" label="CIRH1A"/>
      <node id="4265" label="UQCC2"/>
      <node id="4264" label="ETS2"/>
      <node id="4263" label="TMEM159"/>
      <node id="4262" label="NF1"/>
      <node id="4261" label="MTMR10"/>
      <node id="4260" label="PMP22"/>
      <node id="4259" label="FDFT1"/>
      <node id="4258" label="MDM4"/>
      <node id="4257" label="SEMA4C"/>
      <node id="4256" label="TTLL12"/>
      <node id="4255" label="CLTC"/>
      <node id="4254" label="CASKIN2"/>
      <node id="4253" label="MEIS1"/>
      <node id="4252" label="MEF2A"/>
      <node id="4251" label="DNAJB12"/>
      <node id="4250" label="UBFD1"/>
      <node id="4249" label="WDR46"/>
      <node id="4248" label="NOTCH3"/>
      <node id="4247" label="RHBDD3"/>
      <node id="4246" label="RC3H1"/>
      <node id="4245" label="FOXA1"/>
      <node id="4244" label="COPG1"/>
      <node id="4243" label="UQCRQ"/>
      <node id="4242" label="DIXDC1"/>
      <node id="4241" label="CORO2B"/>
      <node id="4240" label="LGI1"/>
      <node id="4239" label="KLK3"/>
      <node id="4238" label="LGALS8"/>
      <node id="4237" label="SAMD8"/>
      <node id="4236" label="CYC1"/>
      <node id="4235" label="RPS6KA3"/>
      <node id="4234" label="NR2C2AP"/>
      <node id="4233" label="SAC3D1"/>
      <node id="4232" label="E2F3"/>
      <node id="4231" label="DNAH3"/>
      <node id="4230" label="CCDC147"/>
      <node id="4229" label="PRPF19"/>
      <node id="4228" label="FAM3C"/>
      <node id="4227" label="ABI2"/>
      <node id="4226" label="BMP5"/>
      <node id="4225" label="COIL"/>
      <node id="4224" label="KLF9"/>
      <node id="4223" label="PCED1B"/>
      <node id="4222" label="PHF20L1"/>
      <node id="4221" label="FAM114A1"/>
      <node id="4220" label="NAA25"/>
      <node id="4219" label="ATP5G3"/>
      <node id="4218" label="RFT1"/>
      <node id="4217" label="FGD6"/>
      <node id="4216" label="CCNYL1"/>
      <node id="4215" label="ATF7IP"/>
      <node id="4214" label="C5"/>
      <node id="4213" label="EIF2AK1"/>
      <node id="4212" label="HMBS"/>
      <node id="4211" label="THOC1"/>
      <node id="4210" label="CECR5"/>
      <node id="4209" label="GINS3"/>
      <node id="4208" label="PRICKLE2"/>
      <node id="4207" label="SLC15A2"/>
      <node id="4206" label="CLN6"/>
      <node id="4205" label="FZR1"/>
      <node id="4204" label="WDR93"/>
      <node id="4203" label="C3AR1"/>
      <node id="4202" label="LSM12"/>
      <node id="4201" label="HPS1"/>
      <node id="4200" label="H2AFX"/>
      <node id="4199" label="PKM"/>
      <node id="4198" label="DFFA"/>
      <node id="4197" label="PLEKHG4"/>
      <node id="4196" label="IRF3"/>
      <node id="4195" label="HOXB5"/>
      <node id="4194" label="ACADS"/>
      <node id="4193" label="ENKUR"/>
      <node id="4192" label="KIAA0196"/>
      <node id="4191" label="SETBP1"/>
      <node id="4190" label="LTBP2"/>
      <node id="4189" label="CTNND1"/>
      <node id="4188" label="SOX4"/>
      <node id="4187" label="LAGE3"/>
      <node id="4186" label="SLC16A8"/>
      <node id="4185" label="LEPREL4"/>
      <node id="4184" label="IARS2"/>
      <node id="4183" label="SNRNP70"/>
      <node id="4182" label="ACAD8"/>
      <node id="4181" label="RDX"/>
      <node id="4180" label="PGAM5"/>
      <node id="4179" label="MED20"/>
      <node id="4178" label="KIF26B"/>
      <node id="4177" label="ERGIC3"/>
      <node id="4176" label="HDAC10"/>
      <node id="4175" label="SORT1"/>
      <node id="4174" label="MME"/>
      <node id="4173" label="BNIP1"/>
      <node id="4172" label="USP54"/>
      <node id="4171" label="HTRA3"/>
      <node id="4170" label="PLEKHA4"/>
      <node id="4169" label="ZP2"/>
      <node id="4168" label="YDJC"/>
      <node id="4167" label="LMOD3"/>
      <node id="4166" label="SGCB"/>
      <node id="4165" label="TMEM180"/>
      <node id="4164" label="CEP95"/>
      <node id="4163" label="CFD"/>
      <node id="4162" label="LRP2BP"/>
      <node id="4161" label="PNPO"/>
      <node id="4160" label="MOV10"/>
      <node id="4159" label="PPP1CB"/>
      <node id="4158" label="AFAP1L2"/>
      <node id="4157" label="ZNF474"/>
      <node id="4156" label="NCLN"/>
      <node id="4155" label="MYH1"/>
      <node id="4154" label="NSDHL"/>
      <node id="4153" label="GLP2R"/>
      <node id="4152" label="MYOC"/>
      <node id="4151" label="SLX4"/>
      <node id="4150" label="POC1B"/>
      <node id="4149" label="MTERFD1"/>
      <node id="4148" label="NOP14"/>
      <node id="4147" label="CSTF1"/>
      <node id="4146" label="MRPL44"/>
      <node id="4145" label="CRELD2"/>
      <node id="4144" label="FANCF"/>
      <node id="4143" label="SBNO2"/>
      <node id="4142" label="PBX1"/>
      <node id="4141" label="MXI1"/>
      <node id="4140" label="ALG8"/>
      <node id="4139" label="ERAL1"/>
      <node id="4138" label="SH3D19"/>
      <node id="4137" label="METTL9"/>
      <node id="4136" label="PRR15"/>
      <node id="4135" label="TAF1D"/>
      <node id="4134" label="CTTNBP2NL"/>
      <node id="4133" label="RPL36A"/>
      <node id="4132" label="EIF2S1"/>
      <node id="4131" label="FZD6"/>
      <node id="4130" label="MRPL19"/>
      <node id="4129" label="HN1L"/>
      <node id="4128" label="IL1R1"/>
      <node id="4127" label="TMEM63B"/>
      <node id="4126" label="ZBTB4"/>
      <node id="4125" label="RASA2"/>
      <node id="4124" label="UBXN4"/>
      <node id="4123" label="AKR1A1"/>
      <node id="4122" label="ELMO3"/>
      <node id="4121" label="CHPF2"/>
      <node id="4120" label="TANGO2"/>
      <node id="4119" label="SLC16A5"/>
      <node id="4118" label="EPHB2"/>
      <node id="4117" label="TMEM144"/>
      <node id="4116" label="EBF4"/>
      <node id="4115" label="TNFAIP8L1"/>
      <node id="4114" label="SERPINF1"/>
      <node id="4113" label="TOM1L1"/>
      <node id="4112" label="FAH"/>
      <node id="4111" label="JAK3"/>
      <node id="4110" label="SEPHS2"/>
      <node id="4109" label="NXF2"/>
      <node id="4108" label="HIST1H2AB"/>
      <node id="4107" label="SEH1L"/>
      <node id="4106" label="TCF19"/>
      <node id="4105" label="FTSJ1"/>
      <node id="4104" label="PAPD7"/>
      <node id="4103" label="IL11RA"/>
      <node id="4102" label="LLGL1"/>
      <node id="4101" label="AAGAB"/>
      <node id="4100" label="ANKRD36C"/>
      <node id="4099" label="FBXW9"/>
      <node id="4098" label="INTS7"/>
      <node id="4097" label="TMEM99"/>
      <node id="4096" label="SPAG7"/>
      <node id="4095" label="KLF6"/>
      <node id="4094" label="ZNRF1"/>
      <node id="4093" label="TMCC2"/>
      <node id="4092" label="VMP1"/>
      <node id="4091" label="STAMBPL1"/>
      <node id="4090" label="MRPL27"/>
      <node id="4089" label="USP7"/>
      <node id="4088" label="CPNE2"/>
      <node id="4087" label="DCUN1D5"/>
      <node id="4086" label="SLC22A17"/>
      <node id="4085" label="MPV17"/>
      <node id="4084" label="ITGAM"/>
      <node id="4083" label="MCM6"/>
      <node id="4082" label="DHFR"/>
      <node id="4081" label="FIBP"/>
      <node id="4080" label="SLIRP"/>
      <node id="4079" label="DENR"/>
      <node id="4078" label="LGI4"/>
      <node id="4077" label="AC137932.1"/>
      <node id="4076" label="CBFA2T2"/>
      <node id="4075" label="HN1"/>
      <node id="4074" label="HSD17B10"/>
      <node id="4073" label="ADIPOR2"/>
      <node id="4072" label="TNK2"/>
      <node id="4071" label="GABRA3"/>
      <node id="4070" label="HNRNPDL"/>
      <node id="4069" label="YKT6"/>
      <node id="4068" label="PGM5"/>
      <node id="4067" label="AFAP1L1"/>
      <node id="4066" label="C9orf156"/>
      <node id="4065" label="KIF13A"/>
      <node id="4064" label="GPAM"/>
      <node id="4063" label="EEF1E1"/>
      <node id="4062" label="FDX1L"/>
      <node id="4061" label="SLC12A8"/>
      <node id="4060" label="PRRC1"/>
      <node id="4059" label="HDAC5"/>
      <node id="4058" label="EIF4EBP1"/>
      <node id="4057" label="NOL6"/>
      <node id="4056" label="MRPS27"/>
      <node id="4055" label="FTSJ2"/>
      <node id="4054" label="AK2"/>
      <node id="4053" label="UBA6"/>
      <node id="4052" label="NDUFB2"/>
      <node id="4051" label="PHF6"/>
      <node id="4050" label="POP7"/>
      <node id="4049" label="JMJD7"/>
      <node id="4048" label="MXRA7"/>
      <node id="4047" label="HMGCR"/>
      <node id="4046" label="GAB1"/>
      <node id="4045" label="TIAL1"/>
      <node id="4044" label="ABCE1"/>
      <node id="4043" label="PAWR"/>
      <node id="4042" label="SLC6A4"/>
      <node id="4041" label="AGER"/>
      <node id="4040" label="MSRB1"/>
      <node id="4039" label="MYO19"/>
      <node id="4038" label="MSTO1"/>
      <node id="4037" label="NOP56"/>
      <node id="4036" label="TMCO1"/>
      <node id="4035" label="SLC2A3"/>
      <node id="4034" label="KIF17"/>
      <node id="4033" label="FAM173B"/>
      <node id="4032" label="CD96"/>
      <node id="4031" label="STRBP"/>
      <node id="4030" label="NCKAP1"/>
      <node id="4029" label="SULF1"/>
      <node id="4028" label="MCAM"/>
      <node id="4027" label="INTS6"/>
      <node id="4026" label="NDUFAF3"/>
      <node id="4025" label="ADD1"/>
      <node id="4024" label="GLE1"/>
      <node id="4023" label="GTF3C6"/>
      <node id="4022" label="UBE2W"/>
      <node id="4021" label="LATS2"/>
      <node id="4020" label="TMEM33"/>
      <node id="4019" label="GCAT"/>
      <node id="4018" label="CC2D1A"/>
      <node id="4017" label="NAA10"/>
      <node id="4016" label="EXOC3L1"/>
      <node id="4015" label="MGAT2"/>
      <node id="4014" label="C1QTNF5"/>
      <node id="4013" label="PPM1J"/>
      <node id="4012" label="INTS8"/>
      <node id="4011" label="RNF11"/>
      <node id="4010" label="MRPS18B"/>
      <node id="4009" label="EDIL3"/>
      <node id="4008" label="RER1"/>
      <node id="4007" label="SLC5A6"/>
      <node id="4006" label="POLB"/>
      <node id="4005" label="DIAPH1"/>
      <node id="4004" label="TMEM184A"/>
      <node id="4003" label="ECE1"/>
      <node id="4002" label="KDELC2"/>
      <node id="4001" label="SETD2"/>
      <node id="4000" label="SLC39A3"/>
      <node id="3999" label="RNF145"/>
      <node id="3998" label="URB2"/>
      <node id="3997" label="LAMB2"/>
      <node id="3996" label="RPL26L1"/>
      <node id="3995" label="PTPRA"/>
      <node id="3994" label="MRRF"/>
      <node id="3993" label="DPAGT1"/>
      <node id="3992" label="PSIP1"/>
      <node id="3991" label="LGR4"/>
      <node id="3990" label="HS1BP3"/>
      <node id="3989" label="GEMIN6"/>
      <node id="3988" label="PTPLA"/>
      <node id="3987" label="C1orf189"/>
      <node id="3986" label="TCF24"/>
      <node id="3985" label="CHID1"/>
      <node id="3984" label="NCOA1"/>
      <node id="3983" label="CERCAM"/>
      <node id="3982" label="GOT2"/>
      <node id="3981" label="SMURF2"/>
      <node id="3980" label="EFNB2"/>
      <node id="3979" label="TMEM133"/>
      <node id="3978" label="RPRD1A"/>
      <node id="3977" label="DGAT1"/>
      <node id="3976" label="ITGAL"/>
      <node id="3975" label="PTPN7"/>
      <node id="3974" label="SC5D"/>
      <node id="3973" label="EXOSC4"/>
      <node id="3972" label="C12orf52"/>
      <node id="3971" label="CENPBD1"/>
      <node id="3970" label="ABCB8"/>
      <node id="3969" label="COL13A1"/>
      <node id="3968" label="PTBP2"/>
      <node id="3967" label="SOX13"/>
      <node id="3966" label="EOGT"/>
      <node id="3965" label="ENTPD3"/>
      <node id="3964" label="FAM49B"/>
      <node id="3963" label="TMEM199"/>
      <node id="3962" label="MTMR11"/>
      <node id="3961" label="FEM1A"/>
      <node id="3960" label="DGAT2"/>
      <node id="3959" label="GPX1"/>
      <node id="3958" label="SHKBP1"/>
      <node id="3957" label="SUV420H2"/>
      <node id="3956" label="ITLN2"/>
      <node id="3955" label="L3MBTL3"/>
      <node id="3954" label="ZNF593"/>
      <node id="3953" label="LECT1"/>
      <node id="3952" label="UQCR11"/>
      <node id="3951" label="CLP1"/>
      <node id="3950" label="RPS6KA5"/>
      <node id="3949" label="ZC3H11A"/>
      <node id="3948" label="ZNF705A"/>
      <node id="3947" label="APOBEC3B"/>
      <node id="3946" label="ARPC4"/>
      <node id="3945" label="KIF19"/>
      <node id="3944" label="TRMT5"/>
      <node id="3943" label="C12orf55"/>
      <node id="3942" label="MYOZ1"/>
      <node id="3941" label="SLC12A9"/>
      <node id="3940" label="MORN1"/>
      <node id="3939" label="PHF8"/>
      <node id="3938" label="SLC39A7"/>
      <node id="3937" label="GUK1"/>
      <node id="3936" label="OSGEPL1"/>
      <node id="3935" label="MLST8"/>
      <node id="3934" label="FH"/>
      <node id="3933" label="FRAT1"/>
      <node id="3932" label="PTPRD"/>
      <node id="3931" label="LILRB3"/>
      <node id="3930" label="LEMD2"/>
      <node id="3929" label="PYCRL"/>
      <node id="3928" label="UTP14C"/>
      <node id="3927" label="LRRC36"/>
      <node id="3926" label="FAM199X"/>
      <node id="3925" label="BCAS3"/>
      <node id="3924" label="RAD1"/>
      <node id="3923" label="RHBDL2"/>
      <node id="3922" label="MDH1"/>
      <node id="3921" label="FIGNL1"/>
      <node id="3920" label="FXN"/>
      <node id="3919" label="FRMD3"/>
      <node id="3918" label="VHL"/>
      <node id="3917" label="EVPL"/>
      <node id="3916" label="BRIX1"/>
      <node id="3915" label="C7orf63"/>
      <node id="3914" label="RMND5B"/>
      <node id="3913" label="CENPM"/>
      <node id="3912" label="BOLA3"/>
      <node id="3911" label="NGEF"/>
      <node id="3910" label="CFL2"/>
      <node id="3909" label="FHL5"/>
      <node id="3908" label="SEC11C"/>
      <node id="3907" label="TTC18"/>
      <node id="3906" label="SMARCC2"/>
      <node id="3905" label="RPGRIP1L"/>
      <node id="3904" label="NDUFS1"/>
      <node id="3903" label="RALGAPA2"/>
      <node id="3902" label="PDIK1L"/>
      <node id="3901" label="ZDHHC14"/>
      <node id="3900" label="HNRNPM"/>
      <node id="3899" label="PRR24"/>
      <node id="3898" label="ATN1"/>
      <node id="3897" label="PTCD1"/>
      <node id="3896" label="BEND3"/>
      <node id="3895" label="PLEKHH3"/>
      <node id="3894" label="TTC28"/>
      <node id="3893" label="MOCS3"/>
      <node id="3892" label="PIGC"/>
      <node id="3891" label="SLC25A37"/>
      <node id="3890" label="RAB21"/>
      <node id="3889" label="PLEK2"/>
      <node id="3888" label="JPH1"/>
      <node id="3887" label="LANCL1"/>
      <node id="3886" label="RP4-758J18.2"/>
      <node id="3885" label="EPB41L4A"/>
      <node id="3884" label="PRRC2C"/>
      <node id="3883" label="OXR1"/>
      <node id="3882" label="GPRIN1"/>
      <node id="3881" label="RASSF1"/>
      <node id="3880" label="ATP1A1"/>
      <node id="3879" label="SERPINH1"/>
      <node id="3878" label="RELT"/>
      <node id="3877" label="ERO1LB"/>
      <node id="3876" label="CARD10"/>
      <node id="3875" label="CYTH1"/>
      <node id="3874" label="HPGD"/>
      <node id="3873" label="SRGAP2"/>
      <node id="3872" label="SLC22A18AS"/>
      <node id="3871" label="BRI3BP"/>
      <node id="3870" label="LYL1"/>
      <node id="3869" label="SMPD1"/>
      <node id="3868" label="KMT2A"/>
      <node id="3867" label="MTFP1"/>
      <node id="3866" label="TBCE"/>
      <node id="3865" label="SH2D4B"/>
      <node id="3864" label="SFTPA1"/>
      <node id="3863" label="TXNL4A"/>
      <node id="3862" label="THAP8"/>
      <node id="3861" label="WIBG"/>
      <node id="3860" label="C10orf2"/>
      <node id="3859" label="PHF13"/>
      <node id="3858" label="MXRA8"/>
      <node id="3857" label="ARNT"/>
      <node id="3856" label="FAM229B"/>
      <node id="3855" label="SLC28A2"/>
      <node id="3854" label="PURB"/>
      <node id="3853" label="CTIF"/>
      <node id="3852" label="LDLRAD1"/>
      <node id="3851" label="COPB2"/>
      <node id="3850" label="TRMT61B"/>
      <node id="3849" label="MRPS26"/>
      <node id="3848" label="AGPAT4"/>
      <node id="3847" label="SLC25A38"/>
      <node id="3846" label="CCDC113"/>
      <node id="3845" label="SLC25A20"/>
      <node id="3844" label="CBS"/>
      <node id="3843" label="TSPAN7"/>
      <node id="3842" label="ANKRD13D"/>
      <node id="3841" label="FAM126A"/>
      <node id="3840" label="TLE3"/>
      <node id="3839" label="DEF6"/>
      <node id="3838" label="MAATS1"/>
      <node id="3837" label="STEAP2"/>
      <node id="3836" label="TMEM182"/>
      <node id="3835" label="EARS2"/>
      <node id="3834" label="LTV1"/>
      <node id="3833" label="MAGED1"/>
      <node id="3832" label="SLC37A4"/>
      <node id="3831" label="PXN"/>
      <node id="3830" label="COMMD5"/>
      <node id="3829" label="ZW10"/>
      <node id="3828" label="FKBP11"/>
      <node id="3827" label="PLEKHN1"/>
      <node id="3826" label="NEBL"/>
      <node id="3825" label="SPTBN2"/>
      <node id="3824" label="NDUFB9"/>
      <node id="3823" label="USP31"/>
      <node id="3822" label="TEAD3"/>
      <node id="3821" label="LAMTOR2"/>
      <node id="3820" label="CTNS"/>
      <node id="3819" label="C20orf26"/>
      <node id="3818" label="C1QTNF3"/>
      <node id="3817" label="DNAJA3"/>
      <node id="3816" label="KATNBL1"/>
      <node id="3815" label="CNIH4"/>
      <node id="3814" label="TIMM13"/>
      <node id="3813" label="VAC14"/>
      <node id="3812" label="EFNB3"/>
      <node id="3811" label="YPEL3"/>
      <node id="3810" label="NDC1"/>
      <node id="3809" label="MRPS18A"/>
      <node id="3808" label="C10orf35"/>
      <node id="3807" label="MOB2"/>
      <node id="3806" label="TUFM"/>
      <node id="3805" label="ICAM3"/>
      <node id="3804" label="ALKBH7"/>
      <node id="3803" label="POFUT1"/>
      <node id="3802" label="ST6GALNAC2"/>
      <node id="3801" label="RRP36"/>
      <node id="3800" label="NCOA3"/>
      <node id="3799" label="IVNS1ABP"/>
      <node id="3798" label="AKT3"/>
      <node id="3797" label="NOB1"/>
      <node id="3796" label="LYPLA2"/>
      <node id="3795" label="MEMO1"/>
      <node id="3794" label="ITPRIP"/>
      <node id="3793" label="PRRG1"/>
      <node id="3792" label="SEC24D"/>
      <node id="3791" label="MLXIPL"/>
      <node id="3790" label="C19orf24"/>
      <node id="3789" label="PXK"/>
      <node id="3788" label="GUCY1B3"/>
      <node id="3787" label="RSRC2"/>
      <node id="3786" label="SMUG1"/>
      <node id="3785" label="RAP1GAP2"/>
      <node id="3784" label="MYRF"/>
      <node id="3783" label="UCKL1"/>
      <node id="3782" label="TTI2"/>
      <node id="3781" label="CYS1"/>
      <node id="3780" label="FAM120A"/>
      <node id="3779" label="DPH2"/>
      <node id="3778" label="BACH2"/>
      <node id="3777" label="OST4"/>
      <node id="3776" label="COQ9"/>
      <node id="3775" label="PARS2"/>
      <node id="3774" label="SAMSN1"/>
      <node id="3773" label="STOML1"/>
      <node id="3772" label="MAP2K2"/>
      <node id="3771" label="GTF2H3"/>
      <node id="3770" label="PRDX2"/>
      <node id="3769" label="SMG1"/>
      <node id="3768" label="WAPAL"/>
      <node id="3767" label="PRKCE"/>
      <node id="3766" label="RAB5A"/>
      <node id="3765" label="PET112"/>
      <node id="3764" label="TXNDC5"/>
      <node id="3763" label="THEM6"/>
      <node id="3762" label="MEF2D"/>
      <node id="3761" label="MICAL3"/>
      <node id="3760" label="GDPD5"/>
      <node id="3759" label="RPS7"/>
      <node id="3758" label="TTC9C"/>
      <node id="3757" label="PLA2R1"/>
      <node id="3756" label="GBA"/>
      <node id="3755" label="ARHGEF4"/>
      <node id="3754" label="OGFOD1"/>
      <node id="3753" label="PPIL1"/>
      <node id="3752" label="TIMM50"/>
      <node id="3751" label="NAT9"/>
      <node id="3750" label="POLR3E"/>
      <node id="3749" label="TTC16"/>
      <node id="3748" label="HILPDA"/>
      <node id="3747" label="STK11IP"/>
      <node id="3746" label="PPP1R15A"/>
      <node id="3745" label="IER3"/>
      <node id="3744" label="PCDH7"/>
      <node id="3743" label="SMAD9"/>
      <node id="3742" label="MFSD1"/>
      <node id="3741" label="RNF24"/>
      <node id="3740" label="FADD"/>
      <node id="3739" label="EMG1"/>
      <node id="3738" label="FOXN3"/>
      <node id="3737" label="HUWE1"/>
      <node id="3736" label="DERL2"/>
      <node id="3735" label="SHISA3"/>
      <node id="3734" label="TSPYL1"/>
      <node id="3733" label="GABPB1"/>
      <node id="3732" label="SNRPC"/>
      <node id="3731" label="GPRC5C"/>
      <node id="3730" label="CMTM3"/>
      <node id="3729" label="NISCH"/>
      <node id="3728" label="RLIM"/>
      <node id="3727" label="MAGI1"/>
      <node id="3726" label="ITPK1"/>
      <node id="3725" label="MAK16"/>
      <node id="3724" label="MRS2"/>
      <node id="3723" label="BUB3"/>
      <node id="3722" label="GPR39"/>
      <node id="3721" label="USP18"/>
      <node id="3720" label="RANGAP1"/>
      <node id="3719" label="GFM1"/>
      <node id="3718" label="TTN"/>
      <node id="3717" label="LAMTOR5"/>
      <node id="3716" label="SMIM4"/>
      <node id="3715" label="HSDL2"/>
      <node id="3714" label="GSS"/>
      <node id="3713" label="HYLS1"/>
      <node id="3712" label="MRPS11"/>
      <node id="3711" label="ADC"/>
      <node id="3710" label="PRRX1"/>
      <node id="3709" label="CYB5R1"/>
      <node id="3708" label="OXSM"/>
      <node id="3707" label="TRIAP1"/>
      <node id="3706" label="SUV39H2"/>
      <node id="3705" label="AHDC1"/>
      <node id="3704" label="RORA"/>
      <node id="3703" label="SLC44A2"/>
      <node id="3702" label="ARL11"/>
      <node id="3701" label="FADS1"/>
      <node id="3700" label="NAV1"/>
      <node id="3699" label="ZFP69"/>
      <node id="3698" label="IPO9"/>
      <node id="3697" label="OTUD4"/>
      <node id="3696" label="SNX9"/>
      <node id="3695" label="FZD1"/>
      <node id="3694" label="RTKN"/>
      <node id="3693" label="FOXP1"/>
      <node id="3692" label="PROM2"/>
      <node id="3691" label="LMTK2"/>
      <node id="3690" label="NCF2"/>
      <node id="3689" label="RGS9"/>
      <node id="3688" label="FAM183A"/>
      <node id="3687" label="FAM57A"/>
      <node id="3686" label="CD5L"/>
      <node id="3685" label="EFNB1"/>
      <node id="3684" label="PLOD2"/>
      <node id="3683" label="SDF2L1"/>
      <node id="3682" label="MLLT6"/>
      <node id="3681" label="SMYD5"/>
      <node id="3680" label="RBFOX2"/>
      <node id="3679" label="TAB2"/>
      <node id="3678" label="SQRDL"/>
      <node id="3677" label="GALNT5"/>
      <node id="3676" label="FAM173A"/>
      <node id="3675" label="NVL"/>
      <node id="3674" label="SMCO4"/>
      <node id="3673" label="RLF"/>
      <node id="3672" label="CDH13"/>
      <node id="3671" label="ULK3"/>
      <node id="3670" label="MBNL2"/>
      <node id="3669" label="ARAP1"/>
      <node id="3668" label="RS1"/>
      <node id="3667" label="SPATA22"/>
      <node id="3666" label="MASP1"/>
      <node id="3665" label="SRGAP1"/>
      <node id="3664" label="SFI1"/>
      <node id="3663" label="DIEXF"/>
      <node id="3662" label="CLPP"/>
      <node id="3661" label="POP4"/>
      <node id="3660" label="TGFBRAP1"/>
      <node id="3659" label="NARF"/>
      <node id="3658" label="HNRNPK"/>
      <node id="3657" label="FLT3LG"/>
      <node id="3656" label="DNPH1"/>
      <node id="3655" label="GPSM1"/>
      <node id="3654" label="JAGN1"/>
      <node id="3653" label="SYBU"/>
      <node id="3652" label="TBX3"/>
      <node id="3651" label="CCDC101"/>
      <node id="3650" label="PTRH2"/>
      <node id="3649" label="ITGA5"/>
      <node id="3648" label="PQLC2"/>
      <node id="3647" label="KIAA0895"/>
      <node id="3646" label="PSME3"/>
      <node id="3645" label="GPR146"/>
      <node id="3644" label="FOXO3"/>
      <node id="3643" label="MAPK8IP3"/>
      <node id="3642" label="ATP5H"/>
      <node id="3641" label="TULP3"/>
      <node id="3640" label="ATP5F1"/>
      <node id="3639" label="COA6"/>
      <node id="3638" label="SYDE2"/>
      <node id="3637" label="FAM83A"/>
      <node id="3636" label="SLC30A6"/>
      <node id="3635" label="TMEM42"/>
      <node id="3634" label="SPA17"/>
      <node id="3633" label="C20orf24"/>
      <node id="3632" label="ABCD4"/>
      <node id="3631" label="ABL2"/>
      <node id="3630" label="SPATA33"/>
      <node id="3629" label="S100A3"/>
      <node id="3628" label="PFDN6"/>
      <node id="3627" label="METTL6"/>
      <node id="3626" label="ZNF267"/>
      <node id="3625" label="ZDHHC3"/>
      <node id="3624" label="SOCS2"/>
      <node id="3623" label="ADORA2B"/>
      <node id="3622" label="CSF1"/>
      <node id="3621" label="SPRY4"/>
      <node id="3620" label="ADK"/>
      <node id="3619" label="ENTPD7"/>
      <node id="3618" label="ARHGEF10"/>
      <node id="3617" label="RAB27A"/>
      <node id="3616" label="ARHGAP23"/>
      <node id="3615" label="EFNA4"/>
      <node id="3614" label="ERGIC1"/>
      <node id="3613" label="GSTZ1"/>
      <node id="3612" label="CACNB3"/>
      <node id="3611" label="EMP2"/>
      <node id="3610" label="E2F4"/>
      <node id="3609" label="PVRL4"/>
      <node id="3608" label="TKT"/>
      <node id="3607" label="ABCB9"/>
      <node id="3606" label="CISD1"/>
      <node id="3605" label="PSMB5"/>
      <node id="3604" label="CCL3"/>
      <node id="3603" label="PPP1R14C"/>
      <node id="3602" label="XYLB"/>
      <node id="3601" label="RBFA"/>
      <node id="3600" label="ARHGAP24"/>
      <node id="3599" label="PARD3"/>
      <node id="3598" label="EHMT2"/>
      <node id="3597" label="NKD1"/>
      <node id="3596" label="UBE2V1"/>
      <node id="3595" label="TBL2"/>
      <node id="3594" label="WDR77"/>
      <node id="3593" label="ZNF213"/>
      <node id="3592" label="ANAPC11"/>
      <node id="3591" label="LCAT"/>
      <node id="3590" label="PIGS"/>
      <node id="3589" label="HKR1"/>
      <node id="3588" label="SULT1C4"/>
      <node id="3587" label="SGPL1"/>
      <node id="3586" label="GPX8"/>
      <node id="3585" label="TCF12"/>
      <node id="3584" label="PHLDA2"/>
      <node id="3583" label="TOX2"/>
      <node id="3582" label="TIMM8B"/>
      <node id="3581" label="PRPF39"/>
      <node id="3580" label="PGLS"/>
      <node id="3579" label="TRMT2B"/>
      <node id="3578" label="SDCCAG3"/>
      <node id="3577" label="YPEL4"/>
      <node id="3576" label="STEAP3"/>
      <node id="3575" label="ANGPTL1"/>
      <node id="3574" label="TSSC1"/>
      <node id="3573" label="IRF2BP1"/>
      <node id="3572" label="GLB1L"/>
      <node id="3571" label="ZSCAN25"/>
      <node id="3570" label="TMA16"/>
      <node id="3569" label="ACACB"/>
      <node id="3568" label="DAB2IP"/>
      <node id="3567" label="SMPDL3B"/>
      <node id="3566" label="ZHX1-C8ORF76"/>
      <node id="3565" label="ATP6V1A"/>
      <node id="3564" label="CPE"/>
      <node id="3563" label="PCDHGC3"/>
      <node id="3562" label="FOXRED1"/>
      <node id="3561" label="COX7B"/>
      <node id="3560" label="PPIF"/>
      <node id="3559" label="TIMM10"/>
      <node id="3558" label="PLEKHG5"/>
      <node id="3557" label="ENC1"/>
      <node id="3556" label="PSMD2"/>
      <node id="3555" label="UGGT1"/>
      <node id="3554" label="ADAR"/>
      <node id="3553" label="VANGL1"/>
      <node id="3552" label="CSTF3"/>
      <node id="3551" label="NIP7"/>
      <node id="3550" label="LRRC1"/>
      <node id="3549" label="ZDHHC18"/>
      <node id="3548" label="ZER1"/>
      <node id="3547" label="MRPL54"/>
      <node id="3546" label="MCM3"/>
      <node id="3545" label="FNBP4"/>
      <node id="3544" label="PSME4"/>
      <node id="3543" label="CBX3"/>
      <node id="3542" label="LMOD1"/>
      <node id="3541" label="THYN1"/>
      <node id="3540" label="PRKCSH"/>
      <node id="3539" label="RANBP9"/>
      <node id="3538" label="ANKS1A"/>
      <node id="3537" label="NCBP2"/>
      <node id="3536" label="BEST1"/>
      <node id="3535" label="CDC37"/>
      <node id="3534" label="OBSCN"/>
      <node id="3533" label="SCAMP1"/>
      <node id="3532" label="GPN1"/>
      <node id="3531" label="HPSE2"/>
      <node id="3530" label="SOGA1"/>
      <node id="3529" label="PGR"/>
      <node id="3528" label="NDUFA7"/>
      <node id="3527" label="THNSL1"/>
      <node id="3526" label="CD302"/>
      <node id="3525" label="RAC3"/>
      <node id="3524" label="ZNF276"/>
      <node id="3523" label="SESN1"/>
      <node id="3522" label="ARID1B"/>
      <node id="3521" label="ARAP2"/>
      <node id="3520" label="CHMP6"/>
      <node id="3519" label="IL1RL2"/>
      <node id="3518" label="PTX3"/>
      <node id="3517" label="CX3CL1"/>
      <node id="3516" label="NAA30"/>
      <node id="3515" label="ZDHHC13"/>
      <node id="3514" label="ABRACL"/>
      <node id="3513" label="SGCG"/>
      <node id="3512" label="CASP12"/>
      <node id="3511" label="SSC5D"/>
      <node id="3510" label="MLTK"/>
      <node id="3509" label="NAGLU"/>
      <node id="3508" label="IQSEC1"/>
      <node id="3507" label="PDCD2L"/>
      <node id="3506" label="CRY2"/>
      <node id="3505" label="RASAL2"/>
      <node id="3504" label="PCNX"/>
      <node id="3503" label="TSC22D2"/>
      <node id="3502" label="AC026703.1"/>
      <node id="3501" label="NUDT5"/>
      <node id="3500" label="KANSL3"/>
      <node id="3499" label="WBSCR22"/>
      <node id="3498" label="BCCIP"/>
      <node id="3497" label="KDELR1"/>
      <node id="3496" label="SFXN2"/>
      <node id="3495" label="UPF3B"/>
      <node id="3494" label="C5orf34"/>
      <node id="3493" label="DDX11"/>
      <node id="3492" label="CREG1"/>
      <node id="3491" label="FASTKD5"/>
      <node id="3490" label="FAM86C1"/>
      <node id="3489" label="SPCS2"/>
      <node id="3488" label="TBXAS1"/>
      <node id="3487" label="TFR2"/>
      <node id="3486" label="CPXM1"/>
      <node id="3485" label="RSPO3"/>
      <node id="3484" label="DENND1B"/>
      <node id="3483" label="PLIN3"/>
      <node id="3482" label="C6orf223"/>
      <node id="3481" label="C20orf112"/>
      <node id="3480" label="TP53"/>
      <node id="3479" label="C10orf25"/>
      <node id="3478" label="SLC16A6"/>
      <node id="3477" label="DDX41"/>
      <node id="3476" label="DZIP3"/>
      <node id="3475" label="IPO13"/>
      <node id="3474" label="PIP4K2C"/>
      <node id="3473" label="VEGFC"/>
      <node id="3472" label="SLC16A2"/>
      <node id="3471" label="C17orf62"/>
      <node id="3470" label="TNFRSF18"/>
      <node id="3469" label="DENND4A"/>
      <node id="3468" label="CHORDC1"/>
      <node id="3467" label="STAM"/>
      <node id="3466" label="CDH26"/>
      <node id="3465" label="C10orf12"/>
      <node id="3464" label="MX2"/>
      <node id="3463" label="PLXNC1"/>
      <node id="3462" label="ADRBK1"/>
      <node id="3461" label="MAP3K12"/>
      <node id="3460" label="ZNF786"/>
      <node id="3459" label="SLC4A7"/>
      <node id="3458" label="GCDH"/>
      <node id="3457" label="ZNF256"/>
      <node id="3456" label="KAT6A"/>
      <node id="3455" label="TIGIT"/>
      <node id="3454" label="PRF1"/>
      <node id="3453" label="C1orf53"/>
      <node id="3452" label="IDE"/>
      <node id="3451" label="GDI2"/>
      <node id="3450" label="CHEK2"/>
      <node id="3449" label="PSMB2"/>
      <node id="3448" label="HBEGF"/>
      <node id="3447" label="ACVR2B"/>
      <node id="3446" label="MIPEP"/>
      <node id="3445" label="SPATA13"/>
      <node id="3444" label="ZNF728"/>
      <node id="3443" label="AHCTF1"/>
      <node id="3442" label="FAHD1"/>
      <node id="3441" label="TBC1D9B"/>
      <node id="3440" label="MED12"/>
      <node id="3439" label="LSM4"/>
      <node id="3438" label="ENO1"/>
      <node id="3437" label="HIST1H3C"/>
      <node id="3436" label="TRMU"/>
      <node id="3435" label="SLC11A1"/>
      <node id="3434" label="SAMD10"/>
      <node id="3433" label="RPP25L"/>
      <node id="3432" label="CREM"/>
      <node id="3431" label="HECA"/>
      <node id="3430" label="CDKN1C"/>
      <node id="3429" label="LLPH"/>
      <node id="3428" label="ZMIZ2"/>
      <node id="3427" label="ZNF326"/>
      <node id="3426" label="G0S2"/>
      <node id="3425" label="MYO7A"/>
      <node id="3424" label="ATXN2"/>
      <node id="3423" label="AGO2"/>
      <node id="3422" label="YARS2"/>
      <node id="3421" label="TLR8"/>
      <node id="3420" label="WISP2"/>
      <node id="3419" label="ZNF239"/>
      <node id="3418" label="ZNF250"/>
      <node id="3417" label="PON2"/>
      <node id="3416" label="KDM4A"/>
      <node id="3415" label="FANCA"/>
      <node id="3414" label="CCDC150"/>
      <node id="3413" label="ST6GAL1"/>
      <node id="3412" label="POLR2D"/>
      <node id="3411" label="TEX9"/>
      <node id="3410" label="C15orf52"/>
      <node id="3409" label="SERINC2"/>
      <node id="3408" label="PLCD3"/>
      <node id="3407" label="CASP3"/>
      <node id="3406" label="LRCH2"/>
      <node id="3405" label="ECHS1"/>
      <node id="3404" label="SEMA4B"/>
      <node id="3403" label="HPS6"/>
      <node id="3402" label="HDDC3"/>
      <node id="3401" label="GBGT1"/>
      <node id="3400" label="ARHGEF7"/>
      <node id="3399" label="ZKSCAN2"/>
      <node id="3398" label="TMEM167A"/>
      <node id="3397" label="FERMT3"/>
      <node id="3396" label="TAC1"/>
      <node id="3395" label="L3MBTL1"/>
      <node id="3394" label="TTBK2"/>
      <node id="3393" label="DNAJC14"/>
      <node id="3392" label="CPLX2"/>
      <node id="3391" label="RPL10A"/>
      <node id="3390" label="TSPAN12"/>
      <node id="3389" label="C11orf30"/>
      <node id="3388" label="C2orf47"/>
      <node id="3387" label="PLEKHG2"/>
      <node id="3386" label="RALA"/>
      <node id="3385" label="CHSY1"/>
      <node id="3384" label="PRSS12"/>
      <node id="3383" label="SND1"/>
      <node id="3382" label="CACNB1"/>
      <node id="3381" label="NCALD"/>
      <node id="3380" label="DYNC1H1"/>
      <node id="3379" label="EGFL8"/>
      <node id="3378" label="PTPN18"/>
      <node id="3377" label="COL12A1"/>
      <node id="3376" label="TFAP4"/>
      <node id="3375" label="NEDD4"/>
      <node id="3374" label="H2AFV"/>
      <node id="3373" label="MEX3A"/>
      <node id="3372" label="CBFA2T3"/>
      <node id="3371" label="RRS1"/>
      <node id="3370" label="RIMKLB"/>
      <node id="3369" label="INPP5F"/>
      <node id="3368" label="SRP9"/>
      <node id="3367" label="CCT8"/>
      <node id="3366" label="TBCC"/>
      <node id="3365" label="TRPC1"/>
      <node id="3364" label="JMY"/>
      <node id="3363" label="KIAA0020"/>
      <node id="3362" label="GATA2"/>
      <node id="3361" label="CREB3L2"/>
      <node id="3360" label="METTL2A"/>
      <node id="3359" label="AFF1"/>
      <node id="3358" label="RNF19A"/>
      <node id="3357" label="EIF4E3"/>
      <node id="3356" label="ZNF691"/>
      <node id="3355" label="USB1"/>
      <node id="3354" label="FCHSD1"/>
      <node id="3353" label="RIN2"/>
      <node id="3352" label="ZNF341"/>
      <node id="3351" label="ADORA3"/>
      <node id="3350" label="PTK7"/>
      <node id="3349" label="B4GALT3"/>
      <node id="3348" label="RASSF3"/>
      <node id="3347" label="PDE8B"/>
      <node id="3346" label="RASSF8"/>
      <node id="3345" label="TMEM256"/>
      <node id="3344" label="PSMG1"/>
      <node id="3343" label="PPL"/>
      <node id="3342" label="PDZD4"/>
      <node id="3341" label="LDLR"/>
      <node id="3340" label="BAIAP2L1"/>
      <node id="3339" label="PRMT3"/>
      <node id="3338" label="CFLAR"/>
      <node id="3337" label="MARS2"/>
      <node id="3336" label="HNRNPL"/>
      <node id="3335" label="PRKAB2"/>
      <node id="3334" label="DDR1"/>
      <node id="3333" label="NHSL1"/>
      <node id="3332" label="CELSR1"/>
      <node id="3331" label="FYN"/>
      <node id="3330" label="SRCIN1"/>
      <node id="3329" label="NADSYN1"/>
      <node id="3328" label="MPDZ"/>
      <node id="3327" label="MAGIX"/>
      <node id="3326" label="PACRG"/>
      <node id="3325" label="LINC00998"/>
      <node id="3324" label="POMT1"/>
      <node id="3323" label="TNFRSF4"/>
      <node id="3322" label="SNRNP25"/>
      <node id="3321" label="C1QTNF2"/>
      <node id="3320" label="SFRP2"/>
      <node id="3319" label="UTRN"/>
      <node id="3318" label="SNTB2"/>
      <node id="3317" label="MRPL17"/>
      <node id="3316" label="PRPSAP1"/>
      <node id="3315" label="GPR56"/>
      <node id="3314" label="MRPL13"/>
      <node id="3313" label="LGALSL"/>
      <node id="3312" label="RAB1A"/>
      <node id="3311" label="METAP1"/>
      <node id="3310" label="CPB2"/>
      <node id="3309" label="PRKAB1"/>
      <node id="3308" label="NR2F2"/>
      <node id="3307" label="CLEC2D"/>
      <node id="3306" label="ARFGEF1"/>
      <node id="3305" label="HYPK"/>
      <node id="3304" label="TTI1"/>
      <node id="3303" label="NRROS"/>
      <node id="3302" label="TCEB1"/>
      <node id="3301" label="UGDH"/>
      <node id="3300" label="TMEM123"/>
      <node id="3299" label="INTS5"/>
      <node id="3298" label="TPMT"/>
      <node id="3297" label="CDC42BPA"/>
      <node id="3296" label="GMDS"/>
      <node id="3295" label="IL17RD"/>
      <node id="3294" label="IGIP"/>
      <node id="3293" label="SPRY1"/>
      <node id="3292" label="C3orf18"/>
      <node id="3291" label="NEU1"/>
      <node id="3290" label="SLC7A8"/>
      <node id="3289" label="ASUN"/>
      <node id="3288" label="MRPS10"/>
      <node id="3287" label="FSTL1"/>
      <node id="3286" label="ATP1B2"/>
      <node id="3285" label="PSMC2"/>
      <node id="3284" label="ACOT11"/>
      <node id="3283" label="SH3BP5"/>
      <node id="3282" label="LAMP5"/>
      <node id="3281" label="PCDHB10"/>
      <node id="3280" label="KIAA1328"/>
      <node id="3279" label="LRRC20"/>
      <node id="3278" label="CCNH"/>
      <node id="3277" label="SEC14L1"/>
      <node id="3276" label="RBM27"/>
      <node id="3275" label="SP140L"/>
      <node id="3274" label="SH3RF3"/>
      <node id="3273" label="KIAA2026"/>
      <node id="3272" label="TMEM106C"/>
      <node id="3271" label="MPP2"/>
      <node id="3270" label="UBE2N"/>
      <node id="3269" label="NUDT8"/>
      <node id="3268" label="SLC22A4"/>
      <node id="3267" label="RCN1"/>
      <node id="3266" label="PSMB3"/>
      <node id="3265" label="PNRC2"/>
      <node id="3264" label="TOMM40"/>
      <node id="3263" label="FGF1"/>
      <node id="3262" label="PIGO"/>
      <node id="3261" label="PCBP4"/>
      <node id="3260" label="HAGH"/>
      <node id="3259" label="NUP62"/>
      <node id="3258" label="BAG2"/>
      <node id="3257" label="PTPLB"/>
      <node id="3256" label="MAP2K3"/>
      <node id="3255" label="AFAP1"/>
      <node id="3254" label="IPO7"/>
      <node id="3253" label="ZBTB12"/>
      <node id="3252" label="RBBP5"/>
      <node id="3251" label="TRIM25"/>
      <node id="3250" label="SNX17"/>
      <node id="3249" label="IL1RL1"/>
      <node id="3248" label="DHCR7"/>
      <node id="3247" label="TRAF5"/>
      <node id="3246" label="STAT4"/>
      <node id="3245" label="ICMT"/>
      <node id="3244" label="PILRA"/>
      <node id="3243" label="DIP2A"/>
      <node id="3242" label="PTPLAD2"/>
      <node id="3241" label="ARV1"/>
      <node id="3240" label="MLX"/>
      <node id="3239" label="CEP85L"/>
      <node id="3238" label="PLEKHM2"/>
      <node id="3237" label="PHF3"/>
      <node id="3236" label="MTRR"/>
      <node id="3235" label="HIC1"/>
      <node id="3234" label="NOD1"/>
      <node id="3233" label="APLNR"/>
      <node id="3232" label="IFNAR2"/>
      <node id="3231" label="LOXL1"/>
      <node id="3230" label="EIF3B"/>
      <node id="3229" label="YTHDC1"/>
      <node id="3228" label="GTF2I"/>
      <node id="3227" label="PAXIP1"/>
      <node id="3226" label="ITGA11"/>
      <node id="3225" label="NME4"/>
      <node id="3224" label="UTP3"/>
      <node id="3223" label="NFS1"/>
      <node id="3222" label="RGS19"/>
      <node id="3221" label="ZSWIM1"/>
      <node id="3220" label="S100PBP"/>
      <node id="3219" label="RADIL"/>
      <node id="3218" label="SPIN1"/>
      <node id="3217" label="PPP1R16A"/>
      <node id="3216" label="REV3L"/>
      <node id="3215" label="DAK"/>
      <node id="3214" label="PALB2"/>
      <node id="3213" label="ADAM22"/>
      <node id="3212" label="CUL7"/>
      <node id="3211" label="BIN2"/>
      <node id="3210" label="PAK1"/>
      <node id="3209" label="PLCB3"/>
      <node id="3208" label="NUDT16L1"/>
      <node id="3207" label="SHANK3"/>
      <node id="3206" label="ECH1"/>
      <node id="3205" label="TBC1D2B"/>
      <node id="3204" label="NOL3"/>
      <node id="3203" label="AURKAIP1"/>
      <node id="3202" label="AEN"/>
      <node id="3201" label="DGKQ"/>
      <node id="3200" label="PKD1"/>
      <node id="3199" label="CTSF"/>
      <node id="3198" label="TBK1"/>
      <node id="3197" label="SKI"/>
      <node id="3196" label="ZNF275"/>
      <node id="3195" label="TMED1"/>
      <node id="3194" label="DOLK"/>
      <node id="3193" label="SH2D1A"/>
      <node id="3192" label="COL6A3"/>
      <node id="3191" label="RFWD3"/>
      <node id="3190" label="WNT3A"/>
      <node id="3189" label="NAALADL1"/>
      <node id="3188" label="MLYCD"/>
      <node id="3187" label="DPT"/>
      <node id="3186" label="GTPBP4"/>
      <node id="3185" label="ITPKB"/>
      <node id="3184" label="FCHO1"/>
      <node id="3183" label="ADM2"/>
      <node id="3182" label="ABT1"/>
      <node id="3181" label="NFKBIE"/>
      <node id="3180" label="AAED1"/>
      <node id="3179" label="WWP1"/>
      <node id="3178" label="CRBN"/>
      <node id="3177" label="PARD6G"/>
      <node id="3176" label="BCKDK"/>
      <node id="3175" label="B3GALNT1"/>
      <node id="3174" label="NXPH3"/>
      <node id="3173" label="SIK1"/>
      <node id="3172" label="RP11-429E11.3"/>
      <node id="3171" label="NUDCD1"/>
      <node id="3170" label="ZNF138"/>
      <node id="3169" label="RPP25"/>
      <node id="3168" label="NEGR1"/>
      <node id="3167" label="SEMA4A"/>
      <node id="3166" label="OSGIN2"/>
      <node id="3165" label="ATP6V1C1"/>
      <node id="3164" label="FBLIM1"/>
      <node id="3163" label="PDCD2"/>
      <node id="3162" label="PSME1"/>
      <node id="3161" label="SCD5"/>
      <node id="3160" label="LDB1"/>
      <node id="3159" label="WDR90"/>
      <node id="3158" label="POU6F1"/>
      <node id="3157" label="ILK"/>
      <node id="3156" label="TERF2IP"/>
      <node id="3155" label="GLIS2"/>
      <node id="3154" label="RASEF"/>
      <node id="3153" label="TIGD2"/>
      <node id="3152" label="RPP21"/>
      <node id="3151" label="PSMD1"/>
      <node id="3150" label="NANS"/>
      <node id="3149" label="FGFR1OP"/>
      <node id="3148" label="C1orf233"/>
      <node id="3147" label="DYNC2H1"/>
      <node id="3146" label="CHTF18"/>
      <node id="3145" label="C5orf49"/>
      <node id="3144" label="MEIS2"/>
      <node id="3143" label="ROBO3"/>
      <node id="3142" label="SLC2A11"/>
      <node id="3141" label="ARL1"/>
      <node id="3140" label="TPD52L2"/>
      <node id="3139" label="FASTKD1"/>
      <node id="3138" label="GPR135"/>
      <node id="3137" label="CPNE8"/>
      <node id="3136" label="CCDC137"/>
      <node id="3135" label="TMEM8A"/>
      <node id="3134" label="TMEM141"/>
      <node id="3133" label="TOR2A"/>
      <node id="3132" label="CCP110"/>
      <node id="3131" label="KIF22"/>
      <node id="3130" label="DOK6"/>
      <node id="3129" label="JDP2"/>
      <node id="3128" label="CCDC34"/>
      <node id="3127" label="CCNE2"/>
      <node id="3126" label="ZFP69B"/>
      <node id="3125" label="ZBTB9"/>
      <node id="3124" label="PPP2R5A"/>
      <node id="3123" label="MAPRE2"/>
      <node id="3122" label="HMGCL"/>
      <node id="3121" label="CLUH"/>
      <node id="3120" label="GRPEL1"/>
      <node id="3119" label="SLC25A35"/>
      <node id="3118" label="PRDM11"/>
      <node id="3117" label="SYCN"/>
      <node id="3116" label="PNLIPRP1"/>
      <node id="3115" label="CACNG8"/>
      <node id="3114" label="NIN"/>
      <node id="3113" label="VAV2"/>
      <node id="3112" label="FLJ20373"/>
      <node id="3111" label="FER"/>
      <node id="3110" label="HNRNPD"/>
      <node id="3109" label="DIMT1"/>
      <node id="3108" label="DNAJB6"/>
      <node id="3107" label="MRGPRF"/>
      <node id="3106" label="FIZ1"/>
      <node id="3105" label="TMEM209"/>
      <node id="3104" label="ARHGAP8"/>
      <node id="3103" label="PICALM"/>
      <node id="3102" label="CXCL17"/>
      <node id="3101" label="FAM195A"/>
      <node id="3100" label="SORD"/>
      <node id="3099" label="LRRC8E"/>
      <node id="3098" label="FAM91A1"/>
      <node id="3097" label="KLHL17"/>
      <node id="3096" label="SPOCK1"/>
      <node id="3095" label="OTUD1"/>
      <node id="3094" label="HMGCS1"/>
      <node id="3093" label="APOA1BP"/>
      <node id="3092" label="PPP1R14A"/>
      <node id="3091" label="SEPT6"/>
      <node id="3090" label="ERAP2"/>
      <node id="3089" label="MAML1"/>
      <node id="3088" label="AFF4"/>
      <node id="3087" label="PCGF3"/>
      <node id="3086" label="MAST2"/>
      <node id="3085" label="LCP1"/>
      <node id="3084" label="HIPK3"/>
      <node id="3083" label="SULF2"/>
      <node id="3082" label="CORO1B"/>
      <node id="3081" label="COMMD4"/>
      <node id="3080" label="BFAR"/>
      <node id="3079" label="ACVR1B"/>
      <node id="3078" label="DAPK1"/>
      <node id="3077" label="MFN1"/>
      <node id="3076" label="SPHK2"/>
      <node id="3075" label="INPP5D"/>
      <node id="3074" label="TBC1D7"/>
      <node id="3073" label="UXS1"/>
      <node id="3072" label="SYT4"/>
      <node id="3071" label="PRKDC"/>
      <node id="3070" label="RABIF"/>
      <node id="3069" label="CD3EAP"/>
      <node id="3068" label="VPS45"/>
      <node id="3067" label="IQCJ-SCHIP1"/>
      <node id="3066" label="COL18A1"/>
      <node id="3065" label="SLC6A16"/>
      <node id="3064" label="MFAP2"/>
      <node id="3063" label="CPD"/>
      <node id="3062" label="DNASE1"/>
      <node id="3061" label="C7orf55"/>
      <node id="3060" label="SEMA5A"/>
      <node id="3059" label="CORO2A"/>
      <node id="3058" label="CREBZF"/>
      <node id="3057" label="ARHGAP42"/>
      <node id="3056" label="CISD2"/>
      <node id="3055" label="ATP13A2"/>
      <node id="3054" label="ACBD4"/>
      <node id="3053" label="PATZ1"/>
      <node id="3052" label="KLF5"/>
      <node id="3051" label="LEO1"/>
      <node id="3050" label="COASY"/>
      <node id="3049" label="TMPRSS2"/>
      <node id="3048" label="ZBTB24"/>
      <node id="3047" label="KCTD9"/>
      <node id="3046" label="MPZL1"/>
      <node id="3045" label="MTX2"/>
      <node id="3044" label="ANKRD10"/>
      <node id="3043" label="MYO9A"/>
      <node id="3042" label="HNRNPH3"/>
      <node id="3041" label="GNPTG"/>
      <node id="3040" label="ZNF784"/>
      <node id="3039" label="TAS2R43"/>
      <node id="3038" label="AGPAT5"/>
      <node id="3037" label="RPL39L"/>
      <node id="3036" label="CAMTA1"/>
      <node id="3035" label="SLC26A9"/>
      <node id="3034" label="SRPK2"/>
      <node id="3033" label="MYD88"/>
      <node id="3032" label="PPA2"/>
      <node id="3031" label="EIF4E"/>
      <node id="3030" label="ISOC2"/>
      <node id="3029" label="RBBP4"/>
      <node id="3028" label="GAS2L1"/>
      <node id="3027" label="ARL13B"/>
      <node id="3026" label="ZFYVE19"/>
      <node id="3025" label="SF3B2"/>
      <node id="3024" label="PRPF3"/>
      <node id="3023" label="PPP1R12A"/>
      <node id="3022" label="HPS5"/>
      <node id="3021" label="FAM58A"/>
      <node id="3020" label="C11orf24"/>
      <node id="3019" label="BBX"/>
      <node id="3018" label="SPR"/>
      <node id="3017" label="SIGLEC10"/>
      <node id="3016" label="NCKAP5L"/>
      <node id="3015" label="ZNF678"/>
      <node id="3014" label="VPS11"/>
      <node id="3013" label="TMEM92"/>
      <node id="3012" label="RELA"/>
      <node id="3011" label="KIAA1109"/>
      <node id="3010" label="MAGOHB"/>
      <node id="3009" label="CHCHD1"/>
      <node id="3008" label="FKBP7"/>
      <node id="3007" label="COQ2"/>
      <node id="3006" label="KAT6B"/>
      <node id="3005" label="PHF21A"/>
      <node id="3004" label="EIF1B"/>
      <node id="3003" label="RABL5"/>
      <node id="3002" label="BRD4"/>
      <node id="3001" label="SAR1B"/>
      <node id="3000" label="MFSD12"/>
      <node id="2999" label="MOB3B"/>
      <node id="2998" label="EBAG9"/>
      <node id="2997" label="CHIC1"/>
      <node id="2996" label="CGB2"/>
      <node id="2995" label="VWA1"/>
      <node id="2994" label="CYBB"/>
      <node id="2993" label="DVL3"/>
      <node id="2992" label="ALG6"/>
      <node id="2991" label="PCSK4"/>
      <node id="2990" label="ITGA3"/>
      <node id="2989" label="U2SURP"/>
      <node id="2988" label="MIOS"/>
      <node id="2987" label="HMGN1"/>
      <node id="2986" label="STK38L"/>
      <node id="2985" label="CAPZA1"/>
      <node id="2984" label="IQUB"/>
      <node id="2983" label="GTPBP1"/>
      <node id="2982" label="GNA13"/>
      <node id="2981" label="FRYL"/>
      <node id="2980" label="ADAM33"/>
      <node id="2979" label="STRN3"/>
      <node id="2978" label="TRIM59"/>
      <node id="2977" label="PLK3"/>
      <node id="2976" label="RRAGA"/>
      <node id="2975" label="ATXN2L"/>
      <node id="2974" label="XPO6"/>
      <node id="2973" label="NAT1"/>
      <node id="2972" label="NDUFS8"/>
      <node id="2971" label="GYG2"/>
      <node id="2970" label="NOP16"/>
      <node id="2969" label="FMR1"/>
      <node id="2968" label="MKLN1"/>
      <node id="2967" label="CSAD"/>
      <node id="2966" label="UROS"/>
      <node id="2965" label="GAR1"/>
      <node id="2964" label="IFT43"/>
      <node id="2963" label="GART"/>
      <node id="2962" label="AK3"/>
      <node id="2961" label="ZNF185"/>
      <node id="2960" label="DGKZ"/>
      <node id="2959" label="POLR3B"/>
      <node id="2958" label="APMAP"/>
      <node id="2957" label="YIF1B"/>
      <node id="2956" label="ORAI3"/>
      <node id="2955" label="LONRF1"/>
      <node id="2954" label="FRY"/>
      <node id="2953" label="CLASRP"/>
      <node id="2952" label="TWSG1"/>
      <node id="2951" label="RRAGD"/>
      <node id="2950" label="C1orf63"/>
      <node id="2949" label="MCTP2"/>
      <node id="2948" label="MRPS25"/>
      <node id="2947" label="GSR"/>
      <node id="2946" label="GPR126"/>
      <node id="2945" label="SSBP1"/>
      <node id="2944" label="EMC7"/>
      <node id="2943" label="NDUFAF2"/>
      <node id="2942" label="IGF2BP2"/>
      <node id="2941" label="PHC3"/>
      <node id="2940" label="FBXO27"/>
      <node id="2939" label="DECR2"/>
      <node id="2938" label="MECR"/>
      <node id="2937" label="NOMO1"/>
      <node id="2936" label="UBE2K"/>
      <node id="2935" label="TMEM185A"/>
      <node id="2934" label="EXOSC2"/>
      <node id="2933" label="TRAF4"/>
      <node id="2932" label="C17orf96"/>
      <node id="2931" label="UTP6"/>
      <node id="2930" label="CCR5"/>
      <node id="2929" label="PUS1"/>
      <node id="2928" label="ANXA4"/>
      <node id="2927" label="DOK1"/>
      <node id="2926" label="PIP4K2B"/>
      <node id="2925" label="ZFP91"/>
      <node id="2924" label="PPP1R9A"/>
      <node id="2923" label="POU2F2"/>
      <node id="2922" label="FRMD8"/>
      <node id="2921" label="SCLY"/>
      <node id="2920" label="CYLD"/>
      <node id="2919" label="GCC2"/>
      <node id="2918" label="FMOD"/>
      <node id="2917" label="GNAL"/>
      <node id="2916" label="DYRK1B"/>
      <node id="2915" label="SGSM3"/>
      <node id="2914" label="C16orf71"/>
      <node id="2913" label="DTHD1"/>
      <node id="2912" label="KPNA6"/>
      <node id="2911" label="SNUPN"/>
      <node id="2910" label="BLOC1S4"/>
      <node id="2909" label="POGZ"/>
      <node id="2908" label="PHTF2"/>
      <node id="2907" label="PSMD4"/>
      <node id="2906" label="SPRYD4"/>
      <node id="2905" label="TBX5"/>
      <node id="2904" label="NLGN2"/>
      <node id="2903" label="EVA1A"/>
      <node id="2902" label="CEP68"/>
      <node id="2901" label="GABARAPL2"/>
      <node id="2900" label="SOBP"/>
      <node id="2899" label="CD28"/>
      <node id="2898" label="ZNF423"/>
      <node id="2897" label="FAM115A"/>
      <node id="2896" label="PIGW"/>
      <node id="2895" label="ACLY"/>
      <node id="2894" label="SQLE"/>
      <node id="2893" label="BSDC1"/>
      <node id="2892" label="TMEM258"/>
      <node id="2891" label="DAP"/>
      <node id="2890" label="CAMKK2"/>
      <node id="2889" label="DCHS1"/>
      <node id="2888" label="UNC119"/>
      <node id="2887" label="HDHD3"/>
      <node id="2886" label="RPL17"/>
      <node id="2885" label="CTNNA2"/>
      <node id="2884" label="LSM5"/>
      <node id="2883" label="SULT2B1"/>
      <node id="2882" label="SP140"/>
      <node id="2881" label="MPND"/>
      <node id="2880" label="TMEM109"/>
      <node id="2879" label="CPNE1"/>
      <node id="2878" label="SVEP1"/>
      <node id="2877" label="CSPG5"/>
      <node id="2876" label="MGAT1"/>
      <node id="2875" label="CDCP1"/>
      <node id="2874" label="CD8A"/>
      <node id="2873" label="C21orf67"/>
      <node id="2872" label="FUT2"/>
      <node id="2871" label="PKN1"/>
      <node id="2870" label="ARSD"/>
      <node id="2869" label="POLR1C"/>
      <node id="2868" label="FAM229A"/>
      <node id="2867" label="DPH5"/>
      <node id="2866" label="LTC4S"/>
      <node id="2865" label="AC006126.3"/>
      <node id="2864" label="INPP5A"/>
      <node id="2863" label="PRR5L"/>
      <node id="2862" label="MTX1"/>
      <node id="2861" label="TMEM150A"/>
      <node id="2860" label="HMBOX1"/>
      <node id="2859" label="PCGF1"/>
      <node id="2858" label="ZUFSP"/>
      <node id="2857" label="LELP1"/>
      <node id="2856" label="TOMM5"/>
      <node id="2855" label="NPL"/>
      <node id="2854" label="FUT8"/>
      <node id="2853" label="ZNF697"/>
      <node id="2852" label="SLC25A15"/>
      <node id="2851" label="GJA5"/>
      <node id="2850" label="CD1D"/>
      <node id="2849" label="ZC3H14"/>
      <node id="2848" label="HNRNPA3"/>
      <node id="2847" label="HOXB4"/>
      <node id="2846" label="KLF12"/>
      <node id="2845" label="RRM1"/>
      <node id="2844" label="PGBD4"/>
      <node id="2843" label="TAOK2"/>
      <node id="2842" label="TTC7B"/>
      <node id="2841" label="METTL5"/>
      <node id="2840" label="RCC2"/>
      <node id="2839" label="C18orf25"/>
      <node id="2838" label="MKI67IP"/>
      <node id="2837" label="ALYREF"/>
      <node id="2836" label="PHKA1"/>
      <node id="2835" label="MESP1"/>
      <node id="2834" label="PAK1IP1"/>
      <node id="2833" label="TEKT2"/>
      <node id="2832" label="BAK1"/>
      <node id="2831" label="MMP9"/>
      <node id="2830" label="SMC5"/>
      <node id="2829" label="PCDHGA6"/>
      <node id="2828" label="CEACAM19"/>
      <node id="2827" label="EMC9"/>
      <node id="2826" label="ABCA6"/>
      <node id="2825" label="FASTK"/>
      <node id="2824" label="FLVCR1"/>
      <node id="2823" label="KIAA0947"/>
      <node id="2822" label="NDUFB8"/>
      <node id="2821" label="GDPGP1"/>
      <node id="2820" label="NHS"/>
      <node id="2819" label="SNX8"/>
      <node id="2818" label="PCDHB13"/>
      <node id="2817" label="CAPN10"/>
      <node id="2816" label="STAT3"/>
      <node id="2815" label="URM1"/>
      <node id="2814" label="TMEM70"/>
      <node id="2813" label="GLB1L2"/>
      <node id="2812" label="BACH1"/>
      <node id="2811" label="C5orf56"/>
      <node id="2810" label="DDT"/>
      <node id="2809" label="SEMA6B"/>
      <node id="2808" label="JMJD4"/>
      <node id="2807" label="YPEL1"/>
      <node id="2806" label="FAM216B"/>
      <node id="2805" label="C1orf110"/>
      <node id="2804" label="RAB23"/>
      <node id="2803" label="INHBA"/>
      <node id="2802" label="MICU3"/>
      <node id="2801" label="MTHFD2"/>
      <node id="2800" label="RBM45"/>
      <node id="2799" label="CELF1"/>
      <node id="2798" label="TANC1"/>
      <node id="2797" label="MAN2A1"/>
      <node id="2796" label="UQCRH"/>
      <node id="2795" label="BEND7"/>
      <node id="2794" label="EHBP1"/>
      <node id="2793" label="CPOX"/>
      <node id="2792" label="RNF138"/>
      <node id="2791" label="FZD8"/>
      <node id="2790" label="SLC25A28"/>
      <node id="2789" label="NMNAT1"/>
      <node id="2788" label="CRTC3"/>
      <node id="2787" label="SLC12A4"/>
      <node id="2786" label="MAML2"/>
      <node id="2785" label="APCDD1"/>
      <node id="2784" label="NOTCH2"/>
      <node id="2783" label="SLC36A1"/>
      <node id="2782" label="EPN3"/>
      <node id="2781" label="C1orf170"/>
      <node id="2780" label="PDLIM1"/>
      <node id="2779" label="YPEL2"/>
      <node id="2778" label="LYPD1"/>
      <node id="2777" label="NACC1"/>
      <node id="2776" label="CSDE1"/>
      <node id="2775" label="NANP"/>
      <node id="2774" label="CCDC64B"/>
      <node id="2773" label="ETV4"/>
      <node id="2772" label="CEP128"/>
      <node id="2771" label="DPH3"/>
      <node id="2770" label="CDK14"/>
      <node id="2769" label="ISCA2"/>
      <node id="2768" label="FAM76A"/>
      <node id="2767" label="FCGR1B"/>
      <node id="2766" label="SOX5"/>
      <node id="2765" label="ZSWIM3"/>
      <node id="2764" label="LILRA2"/>
      <node id="2763" label="RUNX1"/>
      <node id="2762" label="IL21R"/>
      <node id="2761" label="ACTN2"/>
      <node id="2760" label="LILRA1"/>
      <node id="2759" label="FAM65B"/>
      <node id="2758" label="VGLL3"/>
      <node id="2757" label="NYNRIN"/>
      <node id="2756" label="FKBP14"/>
      <node id="2755" label="MRPS24"/>
      <node id="2754" label="ADAP1"/>
      <node id="2753" label="HSPE1"/>
      <node id="2752" label="IL6"/>
      <node id="2751" label="MBOAT7"/>
      <node id="2750" label="B4GALT7"/>
      <node id="2749" label="FOXS1"/>
      <node id="2748" label="C14orf119"/>
      <node id="2747" label="RAD9A"/>
      <node id="2746" label="C14orf166"/>
      <node id="2745" label="DSC2"/>
      <node id="2744" label="EMC10"/>
      <node id="2743" label="THTPA"/>
      <node id="2742" label="CDPF1"/>
      <node id="2741" label="SORBS1"/>
      <node id="2740" label="PIK3IP1"/>
      <node id="2739" label="FKBP2"/>
      <node id="2738" label="OVCA2"/>
      <node id="2737" label="ALKBH2"/>
      <node id="2736" label="BMP2K"/>
      <node id="2735" label="XKR8"/>
      <node id="2734" label="FZD2"/>
      <node id="2733" label="PRRC2B"/>
      <node id="2732" label="STC1"/>
      <node id="2731" label="TCTN1"/>
      <node id="2730" label="THRA"/>
      <node id="2729" label="TMEM176B"/>
      <node id="2728" label="FUNDC1"/>
      <node id="2727" label="ZBTB44"/>
      <node id="2726" label="ADIRF"/>
      <node id="2725" label="RASGEF1B"/>
      <node id="2724" label="CDC7"/>
      <node id="2723" label="PDF"/>
      <node id="2722" label="MYBL1"/>
      <node id="2721" label="TMED10"/>
      <node id="2720" label="TMEM140"/>
      <node id="2719" label="KDM3B"/>
      <node id="2718" label="GADD45A"/>
      <node id="2717" label="ZFC3H1"/>
      <node id="2716" label="CALU"/>
      <node id="2715" label="FXR1"/>
      <node id="2714" label="ROCK1"/>
      <node id="2713" label="ARSI"/>
      <node id="2712" label="FPR2"/>
      <node id="2711" label="DYX1C1"/>
      <node id="2710" label="CEACAM1"/>
      <node id="2709" label="FBXO16"/>
      <node id="2708" label="MUC4"/>
      <node id="2707" label="NDEL1"/>
      <node id="2706" label="DGCR6L"/>
      <node id="2705" label="ZNF768"/>
      <node id="2704" label="ZNF76"/>
      <node id="2703" label="RPL6"/>
      <node id="2702" label="EMILIN2"/>
      <node id="2701" label="EAF2"/>
      <node id="2700" label="BNC2"/>
      <node id="2699" label="BTN2A2"/>
      <node id="2698" label="RUSC1"/>
      <node id="2697" label="TNFSF15"/>
      <node id="2696" label="TMEM5"/>
      <node id="2695" label="PSMB4"/>
      <node id="2694" label="FAM167B"/>
      <node id="2693" label="PHF10"/>
      <node id="2692" label="GNG10"/>
      <node id="2691" label="VPS37B"/>
      <node id="2690" label="PTPN12"/>
      <node id="2689" label="PSENEN"/>
      <node id="2688" label="RPUSD3"/>
      <node id="2687" label="PER1"/>
      <node id="2686" label="OSBPL7"/>
      <node id="2685" label="GIPC3"/>
      <node id="2684" label="GBP1"/>
      <node id="2683" label="SEC22C"/>
      <node id="2682" label="TRNAU1AP"/>
      <node id="2681" label="WDR3"/>
      <node id="2680" label="NDUFV3"/>
      <node id="2679" label="SPINT2"/>
      <node id="2678" label="BIRC6"/>
      <node id="2677" label="ANKRD42"/>
      <node id="2676" label="SLC36A4"/>
      <node id="2675" label="ZNF358"/>
      <node id="2674" label="ARPC5L"/>
      <node id="2673" label="PNRC1"/>
      <node id="2672" label="PDZD11"/>
      <node id="2671" label="MS4A6A"/>
      <node id="2670" label="DMXL2"/>
      <node id="2669" label="C6orf203"/>
      <node id="2668" label="PCDHGB2"/>
      <node id="2667" label="TDP1"/>
      <node id="2666" label="DGKH"/>
      <node id="2665" label="LDHD"/>
      <node id="2664" label="TCIRG1"/>
      <node id="2663" label="ZC2HC1C"/>
      <node id="2662" label="HPRT1"/>
      <node id="2661" label="SRF"/>
      <node id="2660" label="EIF3A"/>
      <node id="2659" label="MPI"/>
      <node id="2658" label="PLA2G10"/>
      <node id="2657" label="RP1-66C13.4"/>
      <node id="2656" label="TRAF7"/>
      <node id="2655" label="LRRC16A"/>
      <node id="2654" label="MIIP"/>
      <node id="2653" label="PALD1"/>
      <node id="2652" label="DBNDD1"/>
      <node id="2651" label="PPP2R3A"/>
      <node id="2650" label="GLTPD1"/>
      <node id="2649" label="PEX11B"/>
      <node id="2648" label="TBC1D10B"/>
      <node id="2647" label="CCNT2"/>
      <node id="2646" label="GMIP"/>
      <node id="2645" label="RNF10"/>
      <node id="2644" label="SBF1"/>
      <node id="2643" label="CSNK1G3"/>
      <node id="2642" label="PCDHGA12"/>
      <node id="2641" label="KTI12"/>
      <node id="2640" label="C7orf43"/>
      <node id="2639" label="EPM2A"/>
      <node id="2638" label="INPPL1"/>
      <node id="2637" label="ANKRD54"/>
      <node id="2636" label="PPT1"/>
      <node id="2635" label="AP1G2"/>
      <node id="2634" label="CD27"/>
      <node id="2633" label="NFIA"/>
      <node id="2632" label="AGL"/>
      <node id="2631" label="AK4"/>
      <node id="2630" label="NUDT22"/>
      <node id="2629" label="MYBBP1A"/>
      <node id="2628" label="DISP1"/>
      <node id="2627" label="NCF1"/>
      <node id="2626" label="LSM7"/>
      <node id="2625" label="EPB41L3"/>
      <node id="2624" label="ZNF395"/>
      <node id="2623" label="GAGE10"/>
      <node id="2622" label="GATA6"/>
      <node id="2621" label="ELF2"/>
      <node id="2620" label="TCEA2"/>
      <node id="2619" label="CCDC134"/>
      <node id="2618" label="GGCX"/>
      <node id="2617" label="NID1"/>
      <node id="2616" label="TXNDC16"/>
      <node id="2615" label="ANKS3"/>
      <node id="2614" label="ATP2B3"/>
      <node id="2613" label="RPL38"/>
      <node id="2612" label="MRFAP1"/>
      <node id="2611" label="YIPF5"/>
      <node id="2610" label="C5orf45"/>
      <node id="2609" label="PANX1"/>
      <node id="2608" label="PANK1"/>
      <node id="2607" label="BCL2L13"/>
      <node id="2606" label="C3orf14"/>
      <node id="2605" label="CCDC103"/>
      <node id="2604" label="TSPO"/>
      <node id="2603" label="IMPDH2"/>
      <node id="2602" label="MAFF"/>
      <node id="2601" label="MRPS36"/>
      <node id="2600" label="EVC"/>
      <node id="2599" label="SLC17A9"/>
      <node id="2598" label="TCF3"/>
      <node id="2597" label="DFFB"/>
      <node id="2596" label="C3orf33"/>
      <node id="2595" label="SPRED1"/>
      <node id="2594" label="ZMYND15"/>
      <node id="2593" label="KIF9"/>
      <node id="2592" label="RNF122"/>
      <node id="2591" label="NMRAL1"/>
      <node id="2590" label="SWAP70"/>
      <node id="2589" label="ST8SIA4"/>
      <node id="2588" label="BRMS1"/>
      <node id="2587" label="ELOVL6"/>
      <node id="2586" label="AUP1"/>
      <node id="2585" label="CCDC81"/>
      <node id="2584" label="PPFIBP2"/>
      <node id="2583" label="NAB1"/>
      <node id="2582" label="TMPRSS13"/>
      <node id="2581" label="ZBTB8OS"/>
      <node id="2580" label="SP100"/>
      <node id="2579" label="POLG2"/>
      <node id="2578" label="CCS"/>
      <node id="2577" label="CASP6"/>
      <node id="2576" label="C10orf54"/>
      <node id="2575" label="TBL1X"/>
      <node id="2574" label="PLXNA1"/>
      <node id="2573" label="TGS1"/>
      <node id="2572" label="FBXO41"/>
      <node id="2571" label="LCOR"/>
      <node id="2570" label="MRPS5"/>
      <node id="2569" label="DDAH2"/>
      <node id="2568" label="GCSH"/>
      <node id="2567" label="MTHFS"/>
      <node id="2566" label="SERPINA6"/>
      <node id="2565" label="SRSF10"/>
      <node id="2564" label="PYCARD"/>
      <node id="2563" label="DSN1"/>
      <node id="2562" label="CYP27B1"/>
      <node id="2561" label="MSX1"/>
      <node id="2560" label="RNF115"/>
      <node id="2559" label="ZNF365"/>
      <node id="2558" label="SWSAP1"/>
      <node id="2557" label="PSMB7"/>
      <node id="2556" label="FGF11"/>
      <node id="2555" label="PUSL1"/>
      <node id="2554" label="SEMA3F"/>
      <node id="2553" label="AKAP6"/>
      <node id="2552" label="CNNM3"/>
      <node id="2551" label="NUP155"/>
      <node id="2550" label="ZDHHC9"/>
      <node id="2549" label="CTPS1"/>
      <node id="2548" label="ANK2"/>
      <node id="2547" label="MFSD9"/>
      <node id="2546" label="DUS1L"/>
      <node id="2545" label="PCDHGB4"/>
      <node id="2544" label="PDE1B"/>
      <node id="2543" label="IL22RA1"/>
      <node id="2542" label="ARHGAP20"/>
      <node id="2541" label="CDK10"/>
      <node id="2540" label="WAC"/>
      <node id="2539" label="PRMT7"/>
      <node id="2538" label="CHCHD5"/>
      <node id="2537" label="IFRD2"/>
      <node id="2536" label="SLC52A1"/>
      <node id="2535" label="TOR3A"/>
      <node id="2534" label="ZKSCAN1"/>
      <node id="2533" label="TMEM237"/>
      <node id="2532" label="ZAP70"/>
      <node id="2531" label="TMOD2"/>
      <node id="2530" label="APITD1"/>
      <node id="2529" label="CCDC176"/>
      <node id="2528" label="UQCRFS1"/>
      <node id="2527" label="CDA"/>
      <node id="2526" label="TMEM97"/>
      <node id="2525" label="SLC26A6"/>
      <node id="2524" label="DNAJC30"/>
      <node id="2523" label="CLPB"/>
      <node id="2522" label="ARPC1B"/>
      <node id="2521" label="COG8"/>
      <node id="2520" label="DGCR14"/>
      <node id="2519" label="DEFA6"/>
      <node id="2518" label="DEFA5"/>
      <node id="2517" label="ATXN1"/>
      <node id="2516" label="WDR36"/>
      <node id="2515" label="SGCA"/>
      <node id="2514" label="PTGIS"/>
      <node id="2513" label="TRIM33"/>
      <node id="2512" label="GFER"/>
      <node id="2511" label="CSGALNACT2"/>
      <node id="2510" label="MSH2"/>
      <node id="2509" label="UNC5CL"/>
      <node id="2508" label="SLC2A5"/>
      <node id="2507" label="FBXW5"/>
      <node id="2506" label="PTBP1"/>
      <node id="2505" label="PCDHGB6"/>
      <node id="2504" label="FAM154A"/>
      <node id="2503" label="GPBP1"/>
      <node id="2502" label="CABLES1"/>
      <node id="2501" label="IRAK2"/>
      <node id="2500" label="CAV3"/>
      <node id="2499" label="OTC"/>
      <node id="2498" label="COX6B1"/>
      <node id="2497" label="TIMM21"/>
      <node id="2496" label="AAMDC"/>
      <node id="2495" label="STX2"/>
      <node id="2494" label="ARHGEF3"/>
      <node id="2493" label="LIMA1"/>
      <node id="2492" label="THOP1"/>
      <node id="2491" label="PPM1B"/>
      <node id="2490" label="ANXA6"/>
      <node id="2489" label="SP110"/>
      <node id="2488" label="P4HB"/>
      <node id="2487" label="EDA"/>
      <node id="2486" label="BLZF1"/>
      <node id="2485" label="TAZ"/>
      <node id="2484" label="ARHGEF37"/>
      <node id="2483" label="DDX56"/>
      <node id="2482" label="ADAM17"/>
      <node id="2481" label="CARD9"/>
      <node id="2480" label="ROBO2"/>
      <node id="2479" label="NAA40"/>
      <node id="2478" label="FN3KRP"/>
      <node id="2477" label="TRIB1"/>
      <node id="2476" label="TPCN1"/>
      <node id="2475" label="AL162407.1"/>
      <node id="2474" label="C5AR1"/>
      <node id="2473" label="ZNF717"/>
      <node id="2472" label="SIDT2"/>
      <node id="2471" label="ISG20L2"/>
      <node id="2470" label="MAP4K3"/>
      <node id="2469" label="SGTB"/>
      <node id="2468" label="ST8SIA1"/>
      <node id="2467" label="PTGER4"/>
      <node id="2466" label="AP5B1"/>
      <node id="2465" label="EML4"/>
      <node id="2464" label="FAM50B"/>
      <node id="2463" label="HDAC3"/>
      <node id="2462" label="IMPDH1"/>
      <node id="2461" label="MAP4K5"/>
      <node id="2460" label="E2F1"/>
      <node id="2459" label="SFRP4"/>
      <node id="2458" label="PPARD"/>
      <node id="2457" label="FAM98A"/>
      <node id="2456" label="NOP58"/>
      <node id="2455" label="AARS2"/>
      <node id="2454" label="TGIF2"/>
      <node id="2453" label="COMMD9"/>
      <node id="2452" label="ZKSCAN4"/>
      <node id="2451" label="ERI1"/>
      <node id="2450" label="LOXL2"/>
      <node id="2449" label="ZBTB45"/>
      <node id="2448" label="AMOTL2"/>
      <node id="2447" label="PHLDA1"/>
      <node id="2446" label="ITPA"/>
      <node id="2445" label="ORC5"/>
      <node id="2444" label="TTLL7"/>
      <node id="2443" label="AOC2"/>
      <node id="2442" label="GXYLT2"/>
      <node id="2441" label="CDC42SE1"/>
      <node id="2440" label="NDUFAB1"/>
      <node id="2439" label="C16orf91"/>
      <node id="2438" label="SAV1"/>
      <node id="2437" label="ZSCAN18"/>
      <node id="2436" label="VWA7"/>
      <node id="2435" label="RRP1"/>
      <node id="2434" label="LCMT1"/>
      <node id="2433" label="FAM122A"/>
      <node id="2432" label="UBE2Z"/>
      <node id="2431" label="HRSP12"/>
      <node id="2430" label="COX7A2"/>
      <node id="2429" label="EPN2"/>
      <node id="2428" label="NAGS"/>
      <node id="2427" label="DNAJB4"/>
      <node id="2426" label="ZFPM2"/>
      <node id="2425" label="POLR2L"/>
      <node id="2424" label="PUF60"/>
      <node id="2423" label="WHSC1"/>
      <node id="2422" label="LNP1"/>
      <node id="2421" label="PREP"/>
      <node id="2420" label="ZNF143"/>
      <node id="2419" label="BCL2L2"/>
      <node id="2418" label="COPB1"/>
      <node id="2417" label="LOX"/>
      <node id="2416" label="GPATCH2L"/>
      <node id="2415" label="RAPGEF2"/>
      <node id="2414" label="ACADM"/>
      <node id="2413" label="CTSS"/>
      <node id="2412" label="ZNF2"/>
      <node id="2411" label="PPP1R1B"/>
      <node id="2410" label="SMYD3"/>
      <node id="2409" label="CMC2"/>
      <node id="2408" label="NOL11"/>
      <node id="2407" label="MB21D2"/>
      <node id="2406" label="SMIM20"/>
      <node id="2405" label="QSER1"/>
      <node id="2404" label="TRIM58"/>
      <node id="2403" label="GP9"/>
      <node id="2402" label="UBN2"/>
      <node id="2401" label="DCTN5"/>
      <node id="2400" label="AGRN"/>
      <node id="2399" label="RERE"/>
      <node id="2398" label="TMEM44"/>
      <node id="2397" label="SLC38A1"/>
      <node id="2396" label="FAM134B"/>
      <node id="2395" label="XRCC4"/>
      <node id="2394" label="SLMAP"/>
      <node id="2393" label="C9orf91"/>
      <node id="2392" label="ST6GALNAC3"/>
      <node id="2391" label="MBOAT1"/>
      <node id="2390" label="MAN1B1"/>
      <node id="2389" label="SEMA7A"/>
      <node id="2388" label="CLCN3"/>
      <node id="2387" label="TMEM198"/>
      <node id="2386" label="KLHL11"/>
      <node id="2385" label="AP2S1"/>
      <node id="2384" label="ACSBG1"/>
      <node id="2383" label="FPR1"/>
      <node id="2382" label="FAM208B"/>
      <node id="2381" label="OAZ2"/>
      <node id="2380" label="PTPRM"/>
      <node id="2379" label="HNRNPR"/>
      <node id="2378" label="GIT1"/>
      <node id="2377" label="IL10RA"/>
      <node id="2376" label="DNTTIP1"/>
      <node id="2375" label="PLBD1"/>
      <node id="2374" label="PCDP1"/>
      <node id="2373" label="FKBP5"/>
      <node id="2372" label="PDE2A"/>
      <node id="2371" label="DHODH"/>
      <node id="2370" label="NUTF2"/>
      <node id="2369" label="AHSA2"/>
      <node id="2368" label="LMBRD1"/>
      <node id="2367" label="AMT"/>
      <node id="2366" label="CKAP5"/>
      <node id="2365" label="TARS"/>
      <node id="2364" label="ATP5A1"/>
      <node id="2363" label="CYB5RL"/>
      <node id="2362" label="ACOT4"/>
      <node id="2361" label="PRDX3"/>
      <node id="2360" label="TRIM3"/>
      <node id="2359" label="MRPL45"/>
      <node id="2358" label="MRPL40"/>
      <node id="2357" label="GTF3A"/>
      <node id="2356" label="MLH1"/>
      <node id="2355" label="SYT11"/>
      <node id="2354" label="LILRB2"/>
      <node id="2353" label="KIAA1614"/>
      <node id="2352" label="PLOD3"/>
      <node id="2351" label="ALDH4A1"/>
      <node id="2350" label="AK7"/>
      <node id="2349" label="MREG"/>
      <node id="2348" label="RNPEPL1"/>
      <node id="2347" label="C16orf87"/>
      <node id="2346" label="MAP4K4"/>
      <node id="2345" label="ZBED6"/>
      <node id="2344" label="CDK7"/>
      <node id="2343" label="CCR2"/>
      <node id="2342" label="SLC16A3"/>
      <node id="2341" label="CCSER2"/>
      <node id="2340" label="NXF3"/>
      <node id="2339" label="HIST1H2AE"/>
      <node id="2338" label="ELP3"/>
      <node id="2337" label="ABLIM1"/>
      <node id="2336" label="SDAD1"/>
      <node id="2335" label="TINAGL1"/>
      <node id="2334" label="CBX2"/>
      <node id="2333" label="GADD45B"/>
      <node id="2332" label="LIPG"/>
      <node id="2331" label="GRB7"/>
      <node id="2330" label="NREP"/>
      <node id="2329" label="H1F0"/>
      <node id="2328" label="STX10"/>
      <node id="2327" label="UBE2D1"/>
      <node id="2326" label="HOXB6"/>
      <node id="2325" label="INPP1"/>
      <node id="2324" label="LZTR1"/>
      <node id="2323" label="LIG1"/>
      <node id="2322" label="TMEM126A"/>
      <node id="2321" label="CCDC24"/>
      <node id="2320" label="RNF26"/>
      <node id="2319" label="CCDC68"/>
      <node id="2318" label="ZNF524"/>
      <node id="2317" label="GRWD1"/>
      <node id="2316" label="DPY19L4"/>
      <node id="2315" label="AMDHD2"/>
      <node id="2314" label="CLEC4E"/>
      <node id="2313" label="PXDC1"/>
      <node id="2312" label="PNPLA2"/>
      <node id="2311" label="MMP19"/>
      <node id="2310" label="FAM50A"/>
      <node id="2309" label="PEX3"/>
      <node id="2308" label="RSPO2"/>
      <node id="2307" label="PIK3CA"/>
      <node id="2306" label="SYMPK"/>
      <node id="2305" label="HOMER3"/>
      <node id="2304" label="C20orf194"/>
      <node id="2303" label="TMEM203"/>
      <node id="2302" label="NDUFB3"/>
      <node id="2301" label="RNF4"/>
      <node id="2300" label="BABAM1"/>
      <node id="2299" label="HPS3"/>
      <node id="2298" label="PPAN"/>
      <node id="2297" label="SLC7A1"/>
      <node id="2296" label="TPRG1L"/>
      <node id="2295" label="KAL1"/>
      <node id="2294" label="DEPTOR"/>
      <node id="2293" label="NTMT1"/>
      <node id="2292" label="SPOCD1"/>
      <node id="2291" label="HEMK1"/>
      <node id="2290" label="APH1B"/>
      <node id="2289" label="OSCP1"/>
      <node id="2288" label="ELOVL1"/>
      <node id="2287" label="LRIF1"/>
      <node id="2286" label="RPA3"/>
      <node id="2285" label="PPP3CC"/>
      <node id="2284" label="EDEM2"/>
      <node id="2283" label="PPP4R2"/>
      <node id="2282" label="AIF1L"/>
      <node id="2281" label="PBLD"/>
      <node id="2280" label="GABBR1"/>
      <node id="2279" label="GNA11"/>
      <node id="2278" label="KIAA1432"/>
      <node id="2277" label="BTN3A3"/>
      <node id="2276" label="PIGU"/>
      <node id="2275" label="ARL5B"/>
      <node id="2274" label="PM20D2"/>
      <node id="2273" label="WDR89"/>
      <node id="2272" label="CLDND1"/>
      <node id="2271" label="ZCCHC24"/>
      <node id="2270" label="AVL9"/>
      <node id="2269" label="GOLGA5"/>
      <node id="2268" label="BRD1"/>
      <node id="2267" label="PSPH"/>
      <node id="2266" label="CDK2AP2"/>
      <node id="2265" label="PCED1A"/>
      <node id="2264" label="MTMR12"/>
      <node id="2263" label="PPP1R13L"/>
      <node id="2262" label="IL2RB"/>
      <node id="2261" label="NFKBIZ"/>
      <node id="2260" label="SLC33A1"/>
      <node id="2259" label="TRAF6"/>
      <node id="2258" label="PAMR1"/>
      <node id="2257" label="WBSCR16"/>
      <node id="2256" label="DIABLO"/>
      <node id="2255" label="DLX4"/>
      <node id="2254" label="C11orf1"/>
      <node id="2253" label="RAB8B"/>
      <node id="2252" label="ATMIN"/>
      <node id="2251" label="HDHD2"/>
      <node id="2250" label="VMAC"/>
      <node id="2249" label="SEC61A2"/>
      <node id="2248" label="TNFSF13B"/>
      <node id="2247" label="MS4A14"/>
      <node id="2246" label="DHRS4L2"/>
      <node id="2245" label="C7orf41"/>
      <node id="2244" label="PRPF40B"/>
      <node id="2243" label="TRMT12"/>
      <node id="2242" label="GID8"/>
      <node id="2241" label="ABCA9"/>
      <node id="2240" label="RAP2B"/>
      <node id="2239" label="LYPLA1"/>
      <node id="2238" label="MTFR1"/>
      <node id="2237" label="RAB11FIP3"/>
      <node id="2236" label="BTG2"/>
      <node id="2235" label="VAMP5"/>
      <node id="2234" label="DBN1"/>
      <node id="2233" label="KIF5B"/>
      <node id="2232" label="SIK3"/>
      <node id="2231" label="TRAPPC1"/>
      <node id="2230" label="C17orf89"/>
      <node id="2229" label="TCP11L2"/>
      <node id="2228" label="SIGLEC1"/>
      <node id="2227" label="AP003068.6"/>
      <node id="2226" label="CLDN11"/>
      <node id="2225" label="NAA15"/>
      <node id="2224" label="GON4L"/>
      <node id="2223" label="GNB2L1"/>
      <node id="2222" label="HAND1"/>
      <node id="2221" label="GRTP1"/>
      <node id="2220" label="TRIM68"/>
      <node id="2219" label="ACTR3C"/>
      <node id="2218" label="COX8A"/>
      <node id="2217" label="WDR81"/>
      <node id="2216" label="ZDHHC12"/>
      <node id="2215" label="TMEM222"/>
      <node id="2214" label="USP11"/>
      <node id="2213" label="PODXL"/>
      <node id="2212" label="PWP1"/>
      <node id="2211" label="FHL2"/>
      <node id="2210" label="ADRB1"/>
      <node id="2209" label="DHRS4"/>
      <node id="2208" label="CARS2"/>
      <node id="2207" label="IL4R"/>
      <node id="2206" label="DZIP1"/>
      <node id="2205" label="PIGL"/>
      <node id="2204" label="CMYA5"/>
      <node id="2203" label="FGFR1"/>
      <node id="2202" label="PAXBP1"/>
      <node id="2201" label="SH2D2A"/>
      <node id="2200" label="ASB13"/>
      <node id="2199" label="WASL"/>
      <node id="2198" label="TBC1D31"/>
      <node id="2197" label="DHDH"/>
      <node id="2196" label="SOWAHB"/>
      <node id="2195" label="SLC25A6"/>
      <node id="2194" label="GPR89A"/>
      <node id="2193" label="ZNF319"/>
      <node id="2192" label="PTPN11"/>
      <node id="2191" label="SGCE"/>
      <node id="2190" label="CPQ"/>
      <node id="2189" label="LDHB"/>
      <node id="2188" label="BLNK"/>
      <node id="2187" label="ACOT1"/>
      <node id="2186" label="PPARA"/>
      <node id="2185" label="ZDHHC1"/>
      <node id="2184" label="TNFRSF21"/>
      <node id="2183" label="MOCS1"/>
      <node id="2182" label="LPAR3"/>
      <node id="2181" label="RAB12"/>
      <node id="2180" label="TALDO1"/>
      <node id="2179" label="CUL9"/>
      <node id="2178" label="SIGIRR"/>
      <node id="2177" label="KIAA1683"/>
      <node id="2176" label="CRY1"/>
      <node id="2175" label="TMEM205"/>
      <node id="2174" label="RUNX2"/>
      <node id="2173" label="AGTR1"/>
      <node id="2172" label="OSMR"/>
      <node id="2171" label="RABGGTB"/>
      <node id="2170" label="GATM"/>
      <node id="2169" label="TCF25"/>
      <node id="2168" label="CDKN1B"/>
      <node id="2167" label="UFC1"/>
      <node id="2166" label="HOXA5"/>
      <node id="2165" label="MBD3"/>
      <node id="2164" label="MRPL20"/>
      <node id="2163" label="UBXN10"/>
      <node id="2162" label="RHBDF2"/>
      <node id="2161" label="MYL6B"/>
      <node id="2160" label="USP49"/>
      <node id="2159" label="ZNF622"/>
      <node id="2158" label="PEG10"/>
      <node id="2157" label="MAGI2"/>
      <node id="2156" label="KPNA4"/>
      <node id="2155" label="FLNC"/>
      <node id="2154" label="TRAF3"/>
      <node id="2153" label="KIAA1430"/>
      <node id="2152" label="TMEM2"/>
      <node id="2151" label="KIAA1217"/>
      <node id="2150" label="TCEA1"/>
      <node id="2149" label="AP1B1"/>
      <node id="2148" label="DCAF12"/>
      <node id="2147" label="UHRF1BP1L"/>
      <node id="2146" label="KLF7"/>
      <node id="2145" label="AP3M1"/>
      <node id="2144" label="KIAA1279"/>
      <node id="2143" label="PIK3C2A"/>
      <node id="2142" label="ATP2C1"/>
      <node id="2141" label="C12orf45"/>
      <node id="2140" label="SRRT"/>
      <node id="2139" label="LRPAP1"/>
      <node id="2138" label="MEFV"/>
      <node id="2137" label="TPPP"/>
      <node id="2136" label="PHPT1"/>
      <node id="2135" label="C11orf49"/>
      <node id="2134" label="UBR4"/>
      <node id="2133" label="CDC73"/>
      <node id="2132" label="ETFA"/>
      <node id="2131" label="ATG2B"/>
      <node id="2130" label="LAPTM4B"/>
      <node id="2129" label="SLC15A3"/>
      <node id="2128" label="ASCC3"/>
      <node id="2127" label="MZT2A"/>
      <node id="2126" label="STAMBP"/>
      <node id="2125" label="WFIKKN2"/>
      <node id="2124" label="COL6A1"/>
      <node id="2123" label="NONO"/>
      <node id="2122" label="BPHL"/>
      <node id="2121" label="ZNF205"/>
      <node id="2120" label="ALKBH4"/>
      <node id="2119" label="PTRH1"/>
      <node id="2118" label="C5orf58"/>
      <node id="2117" label="GUF1"/>
      <node id="2116" label="AMMECR1"/>
      <node id="2115" label="WNT7A"/>
      <node id="2114" label="PTCD2"/>
      <node id="2113" label="RNF217"/>
      <node id="2112" label="SAYSD1"/>
      <node id="2111" label="MKL2"/>
      <node id="2110" label="WDR86"/>
      <node id="2109" label="ABLIM3"/>
      <node id="2108" label="B4GALT5"/>
      <node id="2107" label="MBOAT2"/>
      <node id="2106" label="EDEM3"/>
      <node id="2105" label="DHX37"/>
      <node id="2104" label="RHOBTB1"/>
      <node id="2103" label="SPSB3"/>
      <node id="2102" label="XAF1"/>
      <node id="2101" label="GATAD2B"/>
      <node id="2100" label="C3orf58"/>
      <node id="2099" label="PHYH"/>
      <node id="2098" label="ZNF195"/>
      <node id="2097" label="OPLAH"/>
      <node id="2096" label="BOLA1"/>
      <node id="2095" label="OTUB2"/>
      <node id="2094" label="PYY"/>
      <node id="2093" label="STAU2"/>
      <node id="2092" label="PDE12"/>
      <node id="2091" label="BAIAP2"/>
      <node id="2090" label="ZCCHC8"/>
      <node id="2089" label="C10orf137"/>
      <node id="2088" label="SAMD11"/>
      <node id="2087" label="ZNF485"/>
      <node id="2086" label="CHST1"/>
      <node id="2085" label="CAMK2G"/>
      <node id="2084" label="PLEKHA5"/>
      <node id="2083" label="RFXANK"/>
      <node id="2082" label="ZNF98"/>
      <node id="2081" label="UQCRC1"/>
      <node id="2080" label="AKAP5"/>
      <node id="2079" label="SLC27A5"/>
      <node id="2078" label="SMDT1"/>
      <node id="2077" label="GPR153"/>
      <node id="2076" label="KLF10"/>
      <node id="2075" label="FA2H"/>
      <node id="2074" label="PLAUR"/>
      <node id="2073" label="NABP1"/>
      <node id="2072" label="KDM3A"/>
      <node id="2071" label="UBE3A"/>
      <node id="2070" label="FOXF2"/>
      <node id="2069" label="GALNT6"/>
      <node id="2068" label="IL18RAP"/>
      <node id="2067" label="C11orf83"/>
      <node id="2066" label="CERKL"/>
      <node id="2065" label="NUDT19"/>
      <node id="2064" label="CD38"/>
      <node id="2063" label="PODXL2"/>
      <node id="2062" label="HOOK3"/>
      <node id="2061" label="H2AFZ"/>
      <node id="2060" label="FAM217B"/>
      <node id="2059" label="PRKAR2A"/>
      <node id="2058" label="TMEM39B"/>
      <node id="2057" label="KNOP1"/>
      <node id="2056" label="R3HDM1"/>
      <node id="2055" label="YARS"/>
      <node id="2054" label="PLEKHB1"/>
      <node id="2053" label="SS18L1"/>
      <node id="2052" label="CD109"/>
      <node id="2051" label="TRAF1"/>
      <node id="2050" label="PDXK"/>
      <node id="2049" label="ZBTB22"/>
      <node id="2048" label="MLLT4"/>
      <node id="2047" label="CIB2"/>
      <node id="2046" label="SLC8B1"/>
      <node id="2045" label="TREM2"/>
      <node id="2044" label="TMEM185B"/>
      <node id="2043" label="RFX3"/>
      <node id="2042" label="BATF3"/>
      <node id="2041" label="SUN2"/>
      <node id="2040" label="GPI"/>
      <node id="2039" label="CLNS1A"/>
      <node id="2038" label="WASH4P"/>
      <node id="2037" label="PRR12"/>
      <node id="2036" label="STRA13"/>
      <node id="2035" label="ATP6V1D"/>
      <node id="2034" label="ALDH16A1"/>
      <node id="2033" label="IMMT"/>
      <node id="2032" label="MPC1"/>
      <node id="2031" label="EID1"/>
      <node id="2030" label="CYSTM1"/>
      <node id="2029" label="ATP1B1"/>
      <node id="2028" label="ZNF286A"/>
      <node id="2027" label="CCHCR1"/>
      <node id="2026" label="ZBTB41"/>
      <node id="2025" label="GRIPAP1"/>
      <node id="2024" label="AMD1"/>
      <node id="2023" label="ZDHHC4"/>
      <node id="2022" label="PCBD2"/>
      <node id="2021" label="JAZF1"/>
      <node id="2020" label="MORC2"/>
      <node id="2019" label="ZFP3"/>
      <node id="2018" label="ZNF415"/>
      <node id="2017" label="SNRNP40"/>
      <node id="2016" label="GPN2"/>
      <node id="2015" label="SHC1"/>
      <node id="2014" label="PHLPP2"/>
      <node id="2013" label="C11orf70"/>
      <node id="2012" label="KIAA1755"/>
      <node id="2011" label="KL"/>
      <node id="2010" label="RHOD"/>
      <node id="2009" label="JUND"/>
      <node id="2008" label="SCYL2"/>
      <node id="2007" label="WNK1"/>
      <node id="2006" label="HAUS4"/>
      <node id="2005" label="IQCC"/>
      <node id="2004" label="CDK20"/>
      <node id="2003" label="TYSND1"/>
      <node id="2002" label="C5orf28"/>
      <node id="2001" label="TSR3"/>
      <node id="2000" label="GGT1"/>
      <node id="1999" label="PLEKHG1"/>
      <node id="1998" label="FBXO22"/>
      <node id="1997" label="FCN1"/>
      <node id="1996" label="BASP1"/>
      <node id="1995" label="ANKIB1"/>
      <node id="1994" label="PAPSS1"/>
      <node id="1993" label="ACAP1"/>
      <node id="1992" label="KIF14"/>
      <node id="1991" label="EPAS1"/>
      <node id="1990" label="GEM"/>
      <node id="1989" label="HARS"/>
      <node id="1988" label="PTOV1"/>
      <node id="1987" label="KLHDC9"/>
      <node id="1986" label="CKLF"/>
      <node id="1985" label="CCNI2"/>
      <node id="1984" label="NIPA1"/>
      <node id="1983" label="IL20RA"/>
      <node id="1982" label="WDR52"/>
      <node id="1981" label="CDC14B"/>
      <node id="1980" label="COL15A1"/>
      <node id="1979" label="APBB2"/>
      <node id="1978" label="ENO4"/>
      <node id="1977" label="ATP2A2"/>
      <node id="1976" label="RGS22"/>
      <node id="1975" label="MPEG1"/>
      <node id="1974" label="PIEZO2"/>
      <node id="1973" label="TSN"/>
      <node id="1972" label="UFSP1"/>
      <node id="1971" label="COL4A3BP"/>
      <node id="1970" label="RPS6KA4"/>
      <node id="1969" label="TRPV4"/>
      <node id="1968" label="AZI1"/>
      <node id="1967" label="PCDHB12"/>
      <node id="1966" label="COX10"/>
      <node id="1965" label="PHLDB1"/>
      <node id="1964" label="PYGO2"/>
      <node id="1963" label="ADAM28"/>
      <node id="1962" label="ZNF254"/>
      <node id="1961" label="POLR2M"/>
      <node id="1960" label="SOX12"/>
      <node id="1959" label="CLASP2"/>
      <node id="1958" label="DCP1A"/>
      <node id="1957" label="FBXL8"/>
      <node id="1956" label="ARRDC4"/>
      <node id="1955" label="KDELR3"/>
      <node id="1954" label="PPM1D"/>
      <node id="1953" label="MSI2"/>
      <node id="1952" label="PCDHAC2"/>
      <node id="1951" label="NUP85"/>
      <node id="1950" label="CXCL12"/>
      <node id="1949" label="RGS11"/>
      <node id="1948" label="NCK2"/>
      <node id="1947" label="C19orf52"/>
      <node id="1946" label="CIC"/>
      <node id="1945" label="CTSZ"/>
      <node id="1944" label="CCDC117"/>
      <node id="1943" label="KCNAB1"/>
      <node id="1942" label="SAMD5"/>
      <node id="1941" label="TEAD1"/>
      <node id="1940" label="ATP6AP1"/>
      <node id="1939" label="SMAD3"/>
      <node id="1938" label="TRUB1"/>
      <node id="1937" label="PPP2R5E"/>
      <node id="1936" label="TIRAP"/>
      <node id="1935" label="CERS6"/>
      <node id="1934" label="COQ6"/>
      <node id="1933" label="POLD2"/>
      <node id="1932" label="TRAF2"/>
      <node id="1931" label="PIK3C2B"/>
      <node id="1930" label="KIAA1147"/>
      <node id="1929" label="LSAMP"/>
      <node id="1928" label="RNASEH2B"/>
      <node id="1927" label="SLC25A17"/>
      <node id="1926" label="HEATR2"/>
      <node id="1925" label="NXT1"/>
      <node id="1924" label="EIF4E2"/>
      <node id="1923" label="SH3BP2"/>
      <node id="1922" label="UHMK1"/>
      <node id="1921" label="XPO5"/>
      <node id="1920" label="SMTN"/>
      <node id="1919" label="SYNE3"/>
      <node id="1918" label="NFYB"/>
      <node id="1917" label="WDFY1"/>
      <node id="1916" label="PAPD4"/>
      <node id="1915" label="C5orf63"/>
      <node id="1914" label="STK39"/>
      <node id="1913" label="XRCC5"/>
      <node id="1912" label="CCDC28B"/>
      <node id="1911" label="JUN"/>
      <node id="1910" label="CORO7"/>
      <node id="1909" label="CD46"/>
      <node id="1908" label="TPM3"/>
      <node id="1907" label="GPR98"/>
      <node id="1906" label="RRP1B"/>
      <node id="1905" label="HERC1"/>
      <node id="1904" label="PCDHGA5"/>
      <node id="1903" label="UQCRC2"/>
      <node id="1902" label="DAAM1"/>
      <node id="1901" label="XPO4"/>
      <node id="1900" label="UBE2Q2"/>
      <node id="1899" label="ZNF259"/>
      <node id="1898" label="DPY30"/>
      <node id="1897" label="G6PC3"/>
      <node id="1896" label="SIRPG"/>
      <node id="1895" label="TBX21"/>
      <node id="1894" label="CD72"/>
      <node id="1893" label="SOCS4"/>
      <node id="1892" label="TXN2"/>
      <node id="1891" label="NCL"/>
      <node id="1890" label="IFFO1"/>
      <node id="1889" label="MRPL23"/>
      <node id="1888" label="CBX8"/>
      <node id="1887" label="SMARCC1"/>
      <node id="1886" label="SAMD12"/>
      <node id="1885" label="TP53I13"/>
      <node id="1884" label="CSRP2"/>
      <node id="1883" label="GDPD1"/>
      <node id="1882" label="MTHFD1L"/>
      <node id="1881" label="RASSF6"/>
      <node id="1880" label="RP11-867G23.8"/>
      <node id="1879" label="EPHA4"/>
      <node id="1878" label="VSTM4"/>
      <node id="1877" label="ARHGEF5"/>
      <node id="1876" label="EAF1"/>
      <node id="1875" label="TIAM2"/>
      <node id="1874" label="NUP98"/>
      <node id="1873" label="PPP2R2D"/>
      <node id="1872" label="RPS6KB1"/>
      <node id="1871" label="ATG2A"/>
      <node id="1870" label="ACAD10"/>
      <node id="1869" label="RCOR3"/>
      <node id="1868" label="ASNA1"/>
      <node id="1867" label="BCR"/>
      <node id="1866" label="FAM26E"/>
      <node id="1865" label="MYCBPAP"/>
      <node id="1864" label="TXLNA"/>
      <node id="1863" label="MRPL28"/>
      <node id="1862" label="XPOT"/>
      <node id="1861" label="SEMA3A"/>
      <node id="1860" label="BMP2"/>
      <node id="1859" label="METTL21B"/>
      <node id="1858" label="TCEB2"/>
      <node id="1857" label="PHKG2"/>
      <node id="1856" label="EFHC1"/>
      <node id="1855" label="KIF20B"/>
      <node id="1854" label="MAP3K7CL"/>
      <node id="1853" label="SLC39A4"/>
      <node id="1852" label="PALMD"/>
      <node id="1851" label="MDP1"/>
      <node id="1850" label="CEP70"/>
      <node id="1849" label="ZNF532"/>
      <node id="1848" label="CNTNAP1"/>
      <node id="1847" label="CYB561D1"/>
      <node id="1846" label="TP53RK"/>
      <node id="1845" label="CDC123"/>
      <node id="1844" label="B3GNT2"/>
      <node id="1843" label="CREB3L4"/>
      <node id="1842" label="PLXNB3"/>
      <node id="1841" label="GALNT18"/>
      <node id="1840" label="AP3B1"/>
      <node id="1839" label="C20orf27"/>
      <node id="1838" label="TTC13"/>
      <node id="1837" label="NHLRC1"/>
      <node id="1836" label="SNX15"/>
      <node id="1835" label="AHR"/>
      <node id="1834" label="COL6A2"/>
      <node id="1833" label="MITD1"/>
      <node id="1832" label="RUVBL2"/>
      <node id="1831" label="CERS2"/>
      <node id="1830" label="VPS26B"/>
      <node id="1829" label="GBP5"/>
      <node id="1828" label="TMEM104"/>
      <node id="1827" label="NDUFA8"/>
      <node id="1826" label="SOWAHC"/>
      <node id="1825" label="NUBP2"/>
      <node id="1824" label="ACOT9"/>
      <node id="1823" label="ZDHHC16"/>
      <node id="1822" label="LRRC47"/>
      <node id="1821" label="SPAG16"/>
      <node id="1820" label="NUDT13"/>
      <node id="1819" label="SURF1"/>
      <node id="1818" label="ASAP1"/>
      <node id="1817" label="PRKAA2"/>
      <node id="1816" label="FKBPL"/>
      <node id="1815" label="LY9"/>
      <node id="1814" label="UBL4A"/>
      <node id="1813" label="RAPH1"/>
      <node id="1812" label="ZNF687"/>
      <node id="1811" label="MMP14"/>
      <node id="1810" label="HIGD1A"/>
      <node id="1809" label="TMEM261"/>
      <node id="1808" label="HINFP"/>
      <node id="1807" label="NIPSNAP3B"/>
      <node id="1806" label="FEM1B"/>
      <node id="1805" label="RTN4R"/>
      <node id="1804" label="CYP2S1"/>
      <node id="1803" label="TADA3"/>
      <node id="1802" label="SMIM1"/>
      <node id="1801" label="ADAMTS14"/>
      <node id="1800" label="LGI2"/>
      <node id="1799" label="HBP1"/>
      <node id="1798" label="UTP20"/>
      <node id="1797" label="TMEM71"/>
      <node id="1796" label="LDLRAD3"/>
      <node id="1795" label="LRRC8D"/>
      <node id="1794" label="C7orf55-LUC7L2"/>
      <node id="1793" label="ANO2"/>
      <node id="1792" label="BCL2L12"/>
      <node id="1791" label="RNF149"/>
      <node id="1790" label="THAP11"/>
      <node id="1789" label="HIP1"/>
      <node id="1788" label="PPME1"/>
      <node id="1787" label="LRR1"/>
      <node id="1786" label="LCA5"/>
      <node id="1785" label="SLC4A1AP"/>
      <node id="1784" label="JMJD1C"/>
      <node id="1783" label="TRIM45"/>
      <node id="1782" label="BET1"/>
      <node id="1781" label="PMVK"/>
      <node id="1780" label="SMCR8"/>
      <node id="1779" label="NCEH1"/>
      <node id="1778" label="DDX49"/>
      <node id="1777" label="ANKRD27"/>
      <node id="1776" label="RARS"/>
      <node id="1775" label="ZNF517"/>
      <node id="1774" label="RALGAPA1"/>
      <node id="1773" label="MFSD3"/>
      <node id="1772" label="RHOT2"/>
      <node id="1771" label="ACBD6"/>
      <node id="1770" label="MEX3D"/>
      <node id="1769" label="GNA15"/>
      <node id="1768" label="CALCOCO2"/>
      <node id="1767" label="IKZF5"/>
      <node id="1766" label="BTAF1"/>
      <node id="1765" label="FASTKD3"/>
      <node id="1764" label="LRCH3"/>
      <node id="1763" label="FDX1"/>
      <node id="1762" label="H3F3A"/>
      <node id="1761" label="ADAM15"/>
      <node id="1760" label="LARS2"/>
      <node id="1759" label="FDXACB1"/>
      <node id="1758" label="CFH"/>
      <node id="1757" label="PPP1R2"/>
      <node id="1756" label="TPM4"/>
      <node id="1755" label="LCP2"/>
      <node id="1754" label="PTTG2"/>
      <node id="1753" label="MLLT10"/>
      <node id="1752" label="TYK2"/>
      <node id="1751" label="HSF4"/>
      <node id="1750" label="VAMP3"/>
      <node id="1749" label="HNRNPLL"/>
      <node id="1748" label="BAZ1B"/>
      <node id="1747" label="C14orf79"/>
      <node id="1746" label="RPS19BP1"/>
      <node id="1745" label="PLA2G7"/>
      <node id="1744" label="RNF144A"/>
      <node id="1743" label="TNRC6A"/>
      <node id="1742" label="IRF2"/>
      <node id="1741" label="EIF3E"/>
      <node id="1740" label="ARHGEF18"/>
      <node id="1739" label="CTTN"/>
      <node id="1738" label="PITPNM2"/>
      <node id="1737" label="PPA1"/>
      <node id="1736" label="TMEM154"/>
      <node id="1735" label="RTCA"/>
      <node id="1734" label="DLL1"/>
      <node id="1733" label="SLC22A18"/>
      <node id="1732" label="USP13"/>
      <node id="1731" label="SHF"/>
      <node id="1730" label="MPP5"/>
      <node id="1729" label="GALNT16"/>
      <node id="1728" label="SCG5"/>
      <node id="1727" label="PRRG4"/>
      <node id="1726" label="CXorf40B"/>
      <node id="1725" label="HYI"/>
      <node id="1724" label="HEXIM2"/>
      <node id="1723" label="ZNF180"/>
      <node id="1722" label="TRAPPC2L"/>
      <node id="1721" label="BTF3L4"/>
      <node id="1720" label="OVOL2"/>
      <node id="1719" label="CDK8"/>
      <node id="1718" label="XBP1"/>
      <node id="1717" label="SNRPB2"/>
      <node id="1716" label="C12orf76"/>
      <node id="1715" label="MAPK13"/>
      <node id="1714" label="CSNK1G2"/>
      <node id="1713" label="RNF166"/>
      <node id="1712" label="FAM117B"/>
      <node id="1711" label="SHANK2"/>
      <node id="1710" label="TESPA1"/>
      <node id="1709" label="PPARGC1B"/>
      <node id="1708" label="ETV6"/>
      <node id="1707" label="C7orf73"/>
      <node id="1706" label="PSMD9"/>
      <node id="1705" label="NOA1"/>
      <node id="1704" label="RNF144B"/>
      <node id="1703" label="IL12RB1"/>
      <node id="1702" label="ZMAT5"/>
      <node id="1701" label="NLRP1"/>
      <node id="1700" label="IFNAR1"/>
      <node id="1699" label="MEN1"/>
      <node id="1698" label="SPAG4"/>
      <node id="1697" label="RPSAP58"/>
      <node id="1696" label="ASAH2B"/>
      <node id="1695" label="SNAP47"/>
      <node id="1694" label="MRPS17"/>
      <node id="1693" label="PLAGL1"/>
      <node id="1692" label="BRICD5"/>
      <node id="1691" label="LARP4"/>
      <node id="1690" label="DCTD"/>
      <node id="1689" label="PAFAH1B1"/>
      <node id="1688" label="GAS7"/>
      <node id="1687" label="YIPF1"/>
      <node id="1686" label="PLXDC2"/>
      <node id="1685" label="TCTA"/>
      <node id="1684" label="DOK3"/>
      <node id="1683" label="RPP38"/>
      <node id="1682" label="DCXR"/>
      <node id="1681" label="DPH7"/>
      <node id="1680" label="TRAK2"/>
      <node id="1679" label="MED15"/>
      <node id="1678" label="GPR160"/>
      <node id="1677" label="CTDNEP1"/>
      <node id="1676" label="HIAT1"/>
      <node id="1675" label="USP14"/>
      <node id="1674" label="WDR45B"/>
      <node id="1673" label="FOSL1"/>
      <node id="1672" label="AMPD2"/>
      <node id="1671" label="UTP11L"/>
      <node id="1670" label="KLRK1"/>
      <node id="1669" label="STIP1"/>
      <node id="1668" label="GRB2"/>
      <node id="1667" label="MAP3K2"/>
      <node id="1666" label="OGG1"/>
      <node id="1665" label="MTMR2"/>
      <node id="1664" label="MAFB"/>
      <node id="1663" label="ELMOD2"/>
      <node id="1662" label="MRPL11"/>
      <node id="1661" label="ABHD6"/>
      <node id="1660" label="TMEM216"/>
      <node id="1659" label="EIF2B5"/>
      <node id="1658" label="DCAF5"/>
      <node id="1657" label="PIK3AP1"/>
      <node id="1656" label="ZNF181"/>
      <node id="1655" label="METTL21A"/>
      <node id="1654" label="GJB7"/>
      <node id="1653" label="MS4A8"/>
      <node id="1652" label="BCL9"/>
      <node id="1651" label="SYNDIG1"/>
      <node id="1650" label="CTB-129P6.11"/>
      <node id="1649" label="LINC00935"/>
      <node id="1648" label="MRPS2"/>
      <node id="1647" label="THRSP"/>
      <node id="1646" label="PLEK"/>
      <node id="1645" label="NSMF"/>
      <node id="1644" label="CHRDL1"/>
      <node id="1643" label="ARRDC2"/>
      <node id="1642" label="GTF2A1"/>
      <node id="1641" label="HEY2"/>
      <node id="1640" label="RNMTL1"/>
      <node id="1639" label="PYCR2"/>
      <node id="1638" label="TMEM54"/>
      <node id="1637" label="SIRT2"/>
      <node id="1636" label="SELRC1"/>
      <node id="1635" label="INPP5J"/>
      <node id="1634" label="BCKDHB"/>
      <node id="1633" label="PXDN"/>
      <node id="1632" label="NOX4"/>
      <node id="1631" label="PTPN2"/>
      <node id="1630" label="ENDOD1"/>
      <node id="1629" label="PID1"/>
      <node id="1628" label="UAP1"/>
      <node id="1627" label="KLHDC1"/>
      <node id="1626" label="PTGFRN"/>
      <node id="1625" label="GNG12"/>
      <node id="1624" label="BIVM"/>
      <node id="1623" label="UBE2D4"/>
      <node id="1622" label="PNP"/>
      <node id="1621" label="MRPL1"/>
      <node id="1620" label="PUM1"/>
      <node id="1619" label="DLAT"/>
      <node id="1618" label="WIPF3"/>
      <node id="1617" label="DES"/>
      <node id="1616" label="CIAO1"/>
      <node id="1615" label="KCNQ2"/>
      <node id="1614" label="ST3GAL4"/>
      <node id="1613" label="MTHFD2L"/>
      <node id="1612" label="RYBP"/>
      <node id="1611" label="MAP3K11"/>
      <node id="1610" label="PLXDC1"/>
      <node id="1609" label="SERPINB6"/>
      <node id="1608" label="ARL8B"/>
      <node id="1607" label="TTC21A"/>
      <node id="1606" label="PPP3R1"/>
      <node id="1605" label="SOCS7"/>
      <node id="1604" label="INSC"/>
      <node id="1603" label="ABCA10"/>
      <node id="1602" label="ASNS"/>
      <node id="1601" label="B3GNTL1"/>
      <node id="1600" label="AEBP2"/>
      <node id="1599" label="CHML"/>
      <node id="1598" label="CHTOP"/>
      <node id="1597" label="C19orf40"/>
      <node id="1596" label="OVGP1"/>
      <node id="1595" label="B3GAT3"/>
      <node id="1594" label="NDUFS3"/>
      <node id="1593" label="NPIPB5"/>
      <node id="1592" label="PHYKPL"/>
      <node id="1591" label="SEMA6C"/>
      <node id="1590" label="FAM63A"/>
      <node id="1589" label="GDF15"/>
      <node id="1588" label="RNASE13"/>
      <node id="1587" label="NMBR"/>
      <node id="1586" label="DMPK"/>
      <node id="1585" label="FAM126B"/>
      <node id="1584" label="ARHGEF40"/>
      <node id="1583" label="RBM5"/>
      <node id="1582" label="PTPN6"/>
      <node id="1581" label="FASTKD2"/>
      <node id="1580" label="MAP4K2"/>
      <node id="1579" label="MIER3"/>
      <node id="1578" label="HGS"/>
      <node id="1577" label="ELAC1"/>
      <node id="1576" label="ASPSCR1"/>
      <node id="1575" label="ARID5B"/>
      <node id="1574" label="DOK4"/>
      <node id="1573" label="MINK1"/>
      <node id="1572" label="AIFM2"/>
      <node id="1571" label="TSHZ1"/>
      <node id="1570" label="EML5"/>
      <node id="1569" label="EPHA3"/>
      <node id="1568" label="COL10A1"/>
      <node id="1567" label="PMPCA"/>
      <node id="1566" label="MFGE8"/>
      <node id="1565" label="ERI2"/>
      <node id="1564" label="RNF126"/>
      <node id="1563" label="C11orf21"/>
      <node id="1562" label="SLC9A7"/>
      <node id="1561" label="MRC1L1"/>
      <node id="1560" label="NFIX"/>
      <node id="1559" label="C15orf65"/>
      <node id="1558" label="CARHSP1"/>
      <node id="1557" label="C1orf106"/>
      <node id="1556" label="BLOC1S5"/>
      <node id="1555" label="SPATA20"/>
      <node id="1554" label="PRDM6"/>
      <node id="1553" label="ANKRD22"/>
      <node id="1552" label="SLC35A1"/>
      <node id="1551" label="LPIN2"/>
      <node id="1550" label="PHIP"/>
      <node id="1549" label="HDLBP"/>
      <node id="1548" label="SLMO2"/>
      <node id="1547" label="PDHX"/>
      <node id="1546" label="PDE7A"/>
      <node id="1545" label="PRCD"/>
      <node id="1544" label="CENPT"/>
      <node id="1543" label="HSF2"/>
      <node id="1542" label="BCAP29"/>
      <node id="1541" label="PLSCR1"/>
      <node id="1540" label="MAP2"/>
      <node id="1539" label="JHDM1D"/>
      <node id="1538" label="SLC27A2"/>
      <node id="1537" label="YME1L1"/>
      <node id="1536" label="ADSS"/>
      <node id="1535" label="SCAF4"/>
      <node id="1534" label="KCNG3"/>
      <node id="1533" label="CHCHD4"/>
      <node id="1532" label="BCLAF1"/>
      <node id="1531" label="ARNTL2"/>
      <node id="1530" label="SEC24B"/>
      <node id="1529" label="TOP2B"/>
      <node id="1528" label="NEDD9"/>
      <node id="1527" label="MATN2"/>
      <node id="1526" label="NBR1"/>
      <node id="1525" label="ACAA1"/>
      <node id="1524" label="GLRX2"/>
      <node id="1523" label="ZNF696"/>
      <node id="1522" label="TMEM200A"/>
      <node id="1521" label="NKIRAS2"/>
      <node id="1520" label="CRISPLD2"/>
      <node id="1519" label="METTL2B"/>
      <node id="1518" label="NUPL2"/>
      <node id="1517" label="CAPN5"/>
      <node id="1516" label="CEP164"/>
      <node id="1515" label="SLC39A14"/>
      <node id="1514" label="SERPINB1"/>
      <node id="1513" label="NUMA1"/>
      <node id="1512" label="POLK"/>
      <node id="1511" label="HHIPL1"/>
      <node id="1510" label="TAF10"/>
      <node id="1509" label="POLR3D"/>
      <node id="1508" label="THNSL2"/>
      <node id="1507" label="FAM211B"/>
      <node id="1506" label="PIAS1"/>
      <node id="1505" label="NUP35"/>
      <node id="1504" label="KLHL23"/>
      <node id="1503" label="GPATCH3"/>
      <node id="1502" label="DENND4B"/>
      <node id="1501" label="UNC93B1"/>
      <node id="1500" label="CHD1L"/>
      <node id="1499" label="LCORL"/>
      <node id="1498" label="PPM1F"/>
      <node id="1497" label="FAM189B"/>
      <node id="1496" label="COPS7B"/>
      <node id="1495" label="SRC"/>
      <node id="1494" label="ZFP41"/>
      <node id="1493" label="EHD3"/>
      <node id="1492" label="TUBG1"/>
      <node id="1491" label="ATP8B2"/>
      <node id="1490" label="HOXA7"/>
      <node id="1489" label="IGFLR1"/>
      <node id="1488" label="IGFBP4"/>
      <node id="1487" label="RSPRY1"/>
      <node id="1486" label="WDR26"/>
      <node id="1485" label="IGDCC4"/>
      <node id="1484" label="SORL1"/>
      <node id="1483" label="ZNF251"/>
      <node id="1482" label="TBC1D9"/>
      <node id="1481" label="OMG"/>
      <node id="1480" label="NDUFB11"/>
      <node id="1479" label="NFKB2"/>
      <node id="1478" label="FAM193B"/>
      <node id="1477" label="HIST1H2BJ"/>
      <node id="1476" label="MORF4L2"/>
      <node id="1475" label="ZNF93"/>
      <node id="1474" label="C6orf89"/>
      <node id="1473" label="CELSR2"/>
      <node id="1472" label="DBF4"/>
      <node id="1471" label="B3GNT1"/>
      <node id="1470" label="DUSP23"/>
      <node id="1469" label="LRRC6"/>
      <node id="1468" label="RPN1"/>
      <node id="1467" label="SRPX2"/>
      <node id="1466" label="PLA2G16"/>
      <node id="1465" label="CBLL1"/>
      <node id="1464" label="ZMIZ1"/>
      <node id="1463" label="BACE2"/>
      <node id="1462" label="TTC14"/>
      <node id="1461" label="TMA7"/>
      <node id="1460" label="FOXK1"/>
      <node id="1459" label="CCDC74B"/>
      <node id="1458" label="TOP3B"/>
      <node id="1457" label="MRPL38"/>
      <node id="1456" label="PTPN14"/>
      <node id="1455" label="SLC35F6"/>
      <node id="1454" label="SLC44A1"/>
      <node id="1453" label="WRAP53"/>
      <node id="1452" label="ASPRV1"/>
      <node id="1451" label="TSEN54"/>
      <node id="1450" label="ZNF443"/>
      <node id="1449" label="LUZP1"/>
      <node id="1448" label="MTERF"/>
      <node id="1447" label="TSNARE1"/>
      <node id="1446" label="UBR2"/>
      <node id="1445" label="TMEM63A"/>
      <node id="1444" label="HLA-F"/>
      <node id="1443" label="ULK2"/>
      <node id="1442" label="ALG2"/>
      <node id="1441" label="CORO6"/>
      <node id="1440" label="C4BPA"/>
      <node id="1439" label="RNF125"/>
      <node id="1438" label="AMIGO1"/>
      <node id="1437" label="GTF2H4"/>
      <node id="1436" label="SAMD4A"/>
      <node id="1435" label="GUCD1"/>
      <node id="1434" label="ACTL10"/>
      <node id="1433" label="CAMK2D"/>
      <node id="1432" label="AASDH"/>
      <node id="1431" label="VPS9D1"/>
      <node id="1430" label="NUDT3"/>
      <node id="1429" label="TMED4"/>
      <node id="1428" label="PDK4"/>
      <node id="1427" label="TMEM259"/>
      <node id="1426" label="PCGF2"/>
      <node id="1425" label="MCOLN1"/>
      <node id="1424" label="ATP8A1"/>
      <node id="1423" label="RSL1D1"/>
      <node id="1422" label="NXN"/>
      <node id="1421" label="PAPLN"/>
      <node id="1420" label="GNL1"/>
      <node id="1419" label="MRPS30"/>
      <node id="1418" label="SF3A2"/>
      <node id="1417" label="CANT1"/>
      <node id="1416" label="LRP5L"/>
      <node id="1415" label="SUCLA2"/>
      <node id="1414" label="NEURL4"/>
      <node id="1413" label="LIAS"/>
      <node id="1412" label="ATP6V1E2"/>
      <node id="1411" label="DOPEY2"/>
      <node id="1410" label="NOMO3"/>
      <node id="1409" label="PTH1R"/>
      <node id="1408" label="LONP1"/>
      <node id="1407" label="TM6SF1"/>
      <node id="1406" label="REXO2"/>
      <node id="1405" label="ZNF91"/>
      <node id="1404" label="KTN1"/>
      <node id="1403" label="KCNA4"/>
      <node id="1402" label="NBEAL1"/>
      <node id="1401" label="C16orf45"/>
      <node id="1400" label="PDCD6"/>
      <node id="1399" label="NENF"/>
      <node id="1398" label="SLC26A2"/>
      <node id="1397" label="SIRPB1"/>
      <node id="1396" label="PPFIA4"/>
      <node id="1395" label="NPRL3"/>
      <node id="1394" label="LRRC37B"/>
      <node id="1393" label="SPRN"/>
      <node id="1392" label="CA5B"/>
      <node id="1391" label="DAD1"/>
      <node id="1390" label="RELL1"/>
      <node id="1389" label="UBE4B"/>
      <node id="1388" label="BICC1"/>
      <node id="1387" label="OTUD7B"/>
      <node id="1386" label="ASB6"/>
      <node id="1385" label="PTPRG"/>
      <node id="1384" label="FOXJ3"/>
      <node id="1383" label="GTF2IRD1"/>
      <node id="1382" label="RIMKLA"/>
      <node id="1381" label="PWWP2A"/>
      <node id="1380" label="UBE2B"/>
      <node id="1379" label="IL18R1"/>
      <node id="1378" label="PUS7"/>
      <node id="1377" label="ANGPT4"/>
      <node id="1376" label="PRICKLE3"/>
      <node id="1375" label="APOB"/>
      <node id="1374" label="COX19"/>
      <node id="1373" label="MITF"/>
      <node id="1372" label="MROH1"/>
      <node id="1371" label="C11orf58"/>
      <node id="1370" label="KBTBD2"/>
      <node id="1369" label="SHARPIN"/>
      <node id="1368" label="TBXA2R"/>
      <node id="1367" label="SPATA5"/>
      <node id="1366" label="PRDM1"/>
      <node id="1365" label="HIPK2"/>
      <node id="1364" label="MAZ"/>
      <node id="1363" label="HSPB7"/>
      <node id="1362" label="MUT"/>
      <node id="1361" label="CPLX1"/>
      <node id="1360" label="POP1"/>
      <node id="1359" label="FAF2"/>
      <node id="1358" label="PTGES2"/>
      <node id="1357" label="JTB"/>
      <node id="1356" label="LRP8"/>
      <node id="1355" label="SCARF2"/>
      <node id="1354" label="CLDN7"/>
      <node id="1353" label="EPHX3"/>
      <node id="1352" label="TLE4"/>
      <node id="1351" label="EPS8L2"/>
      <node id="1350" label="FAM220A"/>
      <node id="1349" label="ZNF92"/>
      <node id="1348" label="BTN2A1"/>
      <node id="1347" label="ARL6"/>
      <node id="1346" label="CPEB3"/>
      <node id="1345" label="SRSF3"/>
      <node id="1344" label="WDR48"/>
      <node id="1343" label="YBX1"/>
      <node id="1342" label="TOP1"/>
      <node id="1341" label="PRKAR2B"/>
      <node id="1340" label="KIAA1107"/>
      <node id="1339" label="NARFL"/>
      <node id="1338" label="SEMA4F"/>
      <node id="1337" label="MAPKAPK2"/>
      <node id="1336" label="C18orf21"/>
      <node id="1335" label="ATP5S"/>
      <node id="1334" label="TRIP12"/>
      <node id="1333" label="HSD3B7"/>
      <node id="1332" label="MRPL14"/>
      <node id="1331" label="SLC40A1"/>
      <node id="1330" label="SH3BP5L"/>
      <node id="1329" label="IFNGR1"/>
      <node id="1328" label="GRIA1"/>
      <node id="1327" label="FAM155B"/>
      <node id="1326" label="TMEM241"/>
      <node id="1325" label="VIMP"/>
      <node id="1324" label="HSPA4"/>
      <node id="1323" label="TBC1D24"/>
      <node id="1322" label="PSMA1"/>
      <node id="1321" label="C5orf22"/>
      <node id="1320" label="SDHB"/>
      <node id="1319" label="GTPBP2"/>
      <node id="1318" label="IRGQ"/>
      <node id="1317" label="SNRNP48"/>
      <node id="1316" label="CSE1L"/>
      <node id="1315" label="SAMM50"/>
      <node id="1314" label="ABCC9"/>
      <node id="1313" label="GOLPH3L"/>
      <node id="1312" label="SLC23A2"/>
      <node id="1311" label="TIAF1"/>
      <node id="1310" label="SF3B4"/>
      <node id="1309" label="SEPT11"/>
      <node id="1308" label="CCNL2"/>
      <node id="1307" label="TMEM254"/>
      <node id="1306" label="P4HA3"/>
      <node id="1305" label="KBTBD6"/>
      <node id="1304" label="KLHL24"/>
      <node id="1303" label="PVR"/>
      <node id="1302" label="SLC35E3"/>
      <node id="1301" label="CCDC51"/>
      <node id="1300" label="ATRN"/>
      <node id="1299" label="HRH1"/>
      <node id="1298" label="PLAGL2"/>
      <node id="1297" label="ARHGAP28"/>
      <node id="1296" label="DEGS2"/>
      <node id="1295" label="TRIM69"/>
      <node id="1294" label="C1GALT1C1"/>
      <node id="1293" label="SSPN"/>
      <node id="1292" label="TTF2"/>
      <node id="1291" label="SULT1A1"/>
      <node id="1290" label="FYCO1"/>
      <node id="1289" label="HPSE"/>
      <node id="1288" label="HIRA"/>
      <node id="1287" label="NUP210"/>
      <node id="1286" label="TBC1D3F"/>
      <node id="1285" label="WSB2"/>
      <node id="1284" label="CYCS"/>
      <node id="1283" label="RBP4"/>
      <node id="1282" label="CHAMP1"/>
      <node id="1281" label="LDHA"/>
      <node id="1280" label="CHRNB1"/>
      <node id="1279" label="EMD"/>
      <node id="1278" label="DZIP1L"/>
      <node id="1277" label="SRSF5"/>
      <node id="1276" label="LSM14A"/>
      <node id="1275" label="TMEM106B"/>
      <node id="1274" label="LUC7L"/>
      <node id="1273" label="TMEM106A"/>
      <node id="1272" label="BCL2"/>
      <node id="1271" label="ZBTB37"/>
      <node id="1270" label="NCOA6"/>
      <node id="1269" label="NR2F1"/>
      <node id="1268" label="ADPGK"/>
      <node id="1267" label="SMAD7"/>
      <node id="1266" label="ZNFX1"/>
      <node id="1265" label="TADA2B"/>
      <node id="1264" label="VAMP8"/>
      <node id="1263" label="FAM118A"/>
      <node id="1262" label="C2CD2"/>
      <node id="1261" label="BRSK1"/>
      <node id="1260" label="VPS13D"/>
      <node id="1259" label="LILRB4"/>
      <node id="1258" label="COMMD3"/>
      <node id="1257" label="FANCL"/>
      <node id="1256" label="COPA"/>
      <node id="1255" label="AVEN"/>
      <node id="1254" label="HRASLS5"/>
      <node id="1253" label="COL11A1"/>
      <node id="1252" label="GNPAT"/>
      <node id="1251" label="PAK4"/>
      <node id="1250" label="ACAD9"/>
      <node id="1249" label="PPP2R5B"/>
      <node id="1248" label="TMEM81"/>
      <node id="1247" label="INTS4"/>
      <node id="1246" label="UCHL1"/>
      <node id="1245" label="PRICKLE1"/>
      <node id="1244" label="RPE"/>
      <node id="1243" label="SUGP1"/>
      <node id="1242" label="SPRTN"/>
      <node id="1241" label="APOL2"/>
      <node id="1240" label="RAB11FIP2"/>
      <node id="1239" label="SERTAD1"/>
      <node id="1238" label="ZSCAN20"/>
      <node id="1237" label="SLC25A29"/>
      <node id="1236" label="DYNC1LI2"/>
      <node id="1235" label="PIP5K1C"/>
      <node id="1234" label="C14orf2"/>
      <node id="1233" label="SYT8"/>
      <node id="1232" label="FAM171A1"/>
      <node id="1231" label="TMEM134"/>
      <node id="1230" label="CD276"/>
      <node id="1229" label="RAD52"/>
      <node id="1228" label="SLC5A7"/>
      <node id="1227" label="ADCK2"/>
      <node id="1226" label="TP53BP2"/>
      <node id="1225" label="KIF1A"/>
      <node id="1224" label="USP21"/>
      <node id="1223" label="BCORL1"/>
      <node id="1222" label="AQP3"/>
      <node id="1221" label="LAYN"/>
      <node id="1220" label="MEX3B"/>
      <node id="1219" label="BRAT1"/>
      <node id="1218" label="CRIPT"/>
      <node id="1217" label="C2orf15"/>
      <node id="1216" label="HSPA6"/>
      <node id="1215" label="PTPRO"/>
      <node id="1214" label="FBXO7"/>
      <node id="1213" label="NAT14"/>
      <node id="1212" label="RSAD2"/>
      <node id="1211" label="LENG8"/>
      <node id="1210" label="GOLT1B"/>
      <node id="1209" label="MRC2"/>
      <node id="1208" label="RPS9"/>
      <node id="1207" label="STK11"/>
      <node id="1206" label="CTDSP1"/>
      <node id="1205" label="RRBP1"/>
      <node id="1204" label="AP3M2"/>
      <node id="1203" label="CCAR1"/>
      <node id="1202" label="FAM171A2"/>
      <node id="1201" label="HIST2H2BE"/>
      <node id="1200" label="SDC4"/>
      <node id="1199" label="MGEA5"/>
      <node id="1198" label="INTS1"/>
      <node id="1197" label="RAMP1"/>
      <node id="1196" label="SLC35B4"/>
      <node id="1195" label="WDR75"/>
      <node id="1194" label="FOXO1"/>
      <node id="1193" label="VMO1"/>
      <node id="1192" label="LAMC3"/>
      <node id="1191" label="USF1"/>
      <node id="1190" label="KIAA0895L"/>
      <node id="1189" label="ARID5A"/>
      <node id="1188" label="ACOT13"/>
      <node id="1187" label="CCDC64"/>
      <node id="1186" label="BCAT1"/>
      <node id="1185" label="HERPUD2"/>
      <node id="1184" label="C22orf29"/>
      <node id="1183" label="PPP1R3E"/>
      <node id="1182" label="HACL1"/>
      <node id="1181" label="UBQLN4"/>
      <node id="1180" label="WDR55"/>
      <node id="1179" label="CP"/>
      <node id="1178" label="DTNBP1"/>
      <node id="1177" label="POLR3C"/>
      <node id="1176" label="NDUFAF6"/>
      <node id="1175" label="GLS"/>
      <node id="1174" label="GPCPD1"/>
      <node id="1173" label="HACE1"/>
      <node id="1172" label="MVB12A"/>
      <node id="1171" label="TPST2"/>
      <node id="1170" label="PNISR"/>
      <node id="1169" label="TRIM73"/>
      <node id="1168" label="TELO2"/>
      <node id="1167" label="NUP188"/>
      <node id="1166" label="ZNF136"/>
      <node id="1165" label="NUDT18"/>
      <node id="1164" label="CYBA"/>
      <node id="1163" label="PRKD3"/>
      <node id="1162" label="ARPC3"/>
      <node id="1161" label="RP11-286N22.8"/>
      <node id="1160" label="EIF4EBP3"/>
      <node id="1159" label="FBXO18"/>
      <node id="1158" label="KANSL1L"/>
      <node id="1157" label="DLD"/>
      <node id="1156" label="LRPPRC"/>
      <node id="1155" label="TARBP1"/>
      <node id="1154" label="ASCC2"/>
      <node id="1153" label="PLOD1"/>
      <node id="1152" label="STON1"/>
      <node id="1151" label="DALRD3"/>
      <node id="1150" label="ZBED2"/>
      <node id="1149" label="ANKRD13B"/>
      <node id="1148" label="PPIB"/>
      <node id="1147" label="R3HDM2"/>
      <node id="1146" label="CTSK"/>
      <node id="1145" label="LSM10"/>
      <node id="1144" label="ASB16"/>
      <node id="1143" label="ISOC1"/>
      <node id="1142" label="LEP"/>
      <node id="1141" label="NFIL3"/>
      <node id="1140" label="WWP2"/>
      <node id="1139" label="TNFAIP8L3"/>
      <node id="1138" label="IL6R"/>
      <node id="1137" label="FAM177A1"/>
      <node id="1136" label="LSM11"/>
      <node id="1135" label="ZNF576"/>
      <node id="1134" label="SSTR1"/>
      <node id="1133" label="ALDH1L2"/>
      <node id="1132" label="SATB1"/>
      <node id="1131" label="FAHD2A"/>
      <node id="1130" label="CHD2"/>
      <node id="1129" label="ITPR1"/>
      <node id="1128" label="TFG"/>
      <node id="1127" label="MBP"/>
      <node id="1126" label="BTN3A1"/>
      <node id="1125" label="MROH6"/>
      <node id="1124" label="AC106876.2"/>
      <node id="1123" label="DNASE1L3"/>
      <node id="1122" label="FAM20B"/>
      <node id="1121" label="ABCC4"/>
      <node id="1120" label="ZNF548"/>
      <node id="1119" label="SIRPB2"/>
      <node id="1118" label="PVRL3"/>
      <node id="1117" label="SIKE1"/>
      <node id="1116" label="USP3"/>
      <node id="1115" label="UTP18"/>
      <node id="1114" label="LRRC29"/>
      <node id="1113" label="SCCPDH"/>
      <node id="1112" label="PPIC"/>
      <node id="1111" label="PCIF1"/>
      <node id="1110" label="BZW1"/>
      <node id="1109" label="NR4A3"/>
      <node id="1108" label="MT1M"/>
      <node id="1107" label="CLEC11A"/>
      <node id="1106" label="MAFK"/>
      <node id="1105" label="PCDH1"/>
      <node id="1104" label="ERVV-1"/>
      <node id="1103" label="PCTP"/>
      <node id="1102" label="ATPAF2"/>
      <node id="1101" label="RTDR1"/>
      <node id="1100" label="ANKRD40"/>
      <node id="1099" label="MAP1LC3C"/>
      <node id="1098" label="MTHFD1"/>
      <node id="1097" label="ZNF79"/>
      <node id="1096" label="PCDHGA4"/>
      <node id="1095" label="RGN"/>
      <node id="1094" label="ATP13A1"/>
      <node id="1093" label="CARD11"/>
      <node id="1092" label="C1orf204"/>
      <node id="1091" label="TNPO3"/>
      <node id="1090" label="MRPS6"/>
      <node id="1089" label="MTMR3"/>
      <node id="1088" label="ARVCF"/>
      <node id="1087" label="METTL18"/>
      <node id="1086" label="ZFYVE21"/>
      <node id="1085" label="NUFIP1"/>
      <node id="1084" label="NR3C1"/>
      <node id="1083" label="ARPP19"/>
      <node id="1082" label="EBLN2"/>
      <node id="1081" label="HSH2D"/>
      <node id="1080" label="ZNF496"/>
      <node id="1079" label="C14orf142"/>
      <node id="1078" label="LRCH4"/>
      <node id="1077" label="NAMPTL"/>
      <node id="1076" label="UBXN11"/>
      <node id="1075" label="BVES"/>
      <node id="1074" label="C16orf86"/>
      <node id="1073" label="SLC29A3"/>
      <node id="1072" label="AMACR"/>
      <node id="1071" label="MRPS9"/>
      <node id="1070" label="MCOLN3"/>
      <node id="1069" label="UBTF"/>
      <node id="1068" label="POLR1A"/>
      <node id="1067" label="CLK2"/>
      <node id="1066" label="DCP2"/>
      <node id="1065" label="ZNF83"/>
      <node id="1064" label="CLK1"/>
      <node id="1063" label="RNFT2"/>
      <node id="1062" label="HEPH"/>
      <node id="1061" label="KPNB1"/>
      <node id="1060" label="MECP2"/>
      <node id="1059" label="CTSO"/>
      <node id="1058" label="BID"/>
      <node id="1057" label="SMNDC1"/>
      <node id="1056" label="UBE2O"/>
      <node id="1055" label="METTL22"/>
      <node id="1054" label="SHC2"/>
      <node id="1053" label="GSKIP"/>
      <node id="1052" label="TNIP2"/>
      <node id="1051" label="IRS2"/>
      <node id="1050" label="IST1"/>
      <node id="1049" label="CCNL1"/>
      <node id="1048" label="TIA1"/>
      <node id="1047" label="SCAMP5"/>
      <node id="1046" label="ZNF37A"/>
      <node id="1045" label="FAM110D"/>
      <node id="1044" label="HCFC1R1"/>
      <node id="1043" label="ASB9"/>
      <node id="1042" label="GPRASP2"/>
      <node id="1041" label="PAPPA"/>
      <node id="1040" label="TTC4"/>
      <node id="1039" label="MANSC1"/>
      <node id="1038" label="ACTG2"/>
      <node id="1037" label="TAF9"/>
      <node id="1036" label="STK17B"/>
      <node id="1035" label="MAPK6"/>
      <node id="1034" label="ITGB5"/>
      <node id="1033" label="C12orf68"/>
      <node id="1032" label="FAM222A"/>
      <node id="1031" label="MPST"/>
      <node id="1030" label="USP10"/>
      <node id="1029" label="TRIM44"/>
      <node id="1028" label="PPP1R15B"/>
      <node id="1027" label="DNAJC4"/>
      <node id="1026" label="TNFRSF10A"/>
      <node id="1025" label="WDR27"/>
      <node id="1024" label="WFDC1"/>
      <node id="1023" label="GTF3C2"/>
      <node id="1022" label="ZNF75A"/>
      <node id="1021" label="SSH1"/>
      <node id="1020" label="SLC18B1"/>
      <node id="1019" label="DUS2"/>
      <node id="1018" label="EPB41"/>
      <node id="1017" label="ZC3H12B"/>
      <node id="1016" label="FOSL2"/>
      <node id="1015" label="FBXO3"/>
      <node id="1014" label="TMEM62"/>
      <node id="1013" label="TMEM161A"/>
      <node id="1012" label="SLC25A18"/>
      <node id="1011" label="TK2"/>
      <node id="1010" label="TRIM11"/>
      <node id="1009" label="BCOR"/>
      <node id="1008" label="TMOD3"/>
      <node id="1007" label="SERTAD4"/>
      <node id="1006" label="SEC24C"/>
      <node id="1005" label="SPATA24"/>
      <node id="1004" label="CINP"/>
      <node id="1003" label="SKIV2L"/>
      <node id="1002" label="MR1"/>
      <node id="1001" label="CCDC142"/>
      <node id="1000" label="ZNF506"/>
      <node id="999" label="REXO4"/>
      <node id="998" label="ATAT1"/>
      <node id="997" label="PCBD1"/>
      <node id="996" label="TOLLIP"/>
      <node id="995" label="TMEM35"/>
      <node id="994" label="GLA"/>
      <node id="993" label="ARMC10"/>
      <node id="992" label="HLTF"/>
      <node id="991" label="SETDB2"/>
      <node id="990" label="DDX17"/>
      <node id="989" label="PCDHB7"/>
      <node id="988" label="ZNF107"/>
      <node id="987" label="RQCD1"/>
      <node id="986" label="SRP68"/>
      <node id="985" label="BROX"/>
      <node id="984" label="NAGK"/>
      <node id="983" label="TSHZ2"/>
      <node id="982" label="DHRS7"/>
      <node id="981" label="ZNF451"/>
      <node id="980" label="PHF20"/>
      <node id="979" label="RABEPK"/>
      <node id="978" label="PLGRKT"/>
      <node id="977" label="MED19"/>
      <node id="976" label="GTPBP3"/>
      <node id="975" label="CLEC4M"/>
      <node id="974" label="COL25A1"/>
      <node id="973" label="TNFAIP6"/>
      <node id="972" label="ATG4B"/>
      <node id="971" label="C12orf5"/>
      <node id="970" label="TNRC18"/>
      <node id="969" label="USP2"/>
      <node id="968" label="ADAP2"/>
      <node id="967" label="PCDH18"/>
      <node id="966" label="SLC41A2"/>
      <node id="965" label="DBNL"/>
      <node id="964" label="HSPB11"/>
      <node id="963" label="CMTM8"/>
      <node id="962" label="RNF170"/>
      <node id="961" label="GOPC"/>
      <node id="960" label="UNK"/>
      <node id="959" label="ANKS6"/>
      <node id="958" label="CS"/>
      <node id="957" label="IL7R"/>
      <node id="956" label="ATP6V1E1"/>
      <node id="955" label="TMEM88"/>
      <node id="954" label="ADCYAP1R1"/>
      <node id="953" label="MPC2"/>
      <node id="952" label="IRS1"/>
      <node id="951" label="KANK4"/>
      <node id="950" label="TRMT2A"/>
      <node id="949" label="PCDHGA9"/>
      <node id="948" label="FARP1"/>
      <node id="947" label="IL1R2"/>
      <node id="946" label="ATP2C2"/>
      <node id="945" label="POLM"/>
      <node id="944" label="HNRNPH1"/>
      <node id="943" label="S100A13"/>
      <node id="942" label="AKAP17A"/>
      <node id="941" label="AGO3"/>
      <node id="940" label="RBCK1"/>
      <node id="939" label="CTBP2"/>
      <node id="938" label="CTPS2"/>
      <node id="937" label="BMX"/>
      <node id="936" label="DNAH7"/>
      <node id="935" label="SOX18"/>
      <node id="934" label="UBE3C"/>
      <node id="933" label="UROD"/>
      <node id="932" label="FBXO44"/>
      <node id="931" label="HARS2"/>
      <node id="930" label="LGMN"/>
      <node id="929" label="OBSL1"/>
      <node id="928" label="SLX1A"/>
      <node id="927" label="DEDD"/>
      <node id="926" label="FUOM"/>
      <node id="925" label="SLC43A3"/>
      <node id="924" label="NOS3"/>
      <node id="923" label="CCDC125"/>
      <node id="922" label="ZDHHC5"/>
      <node id="921" label="MINA"/>
      <node id="920" label="SLC35F5"/>
      <node id="919" label="CYP2U1"/>
      <node id="918" label="MAPK8IP2"/>
      <node id="917" label="NT5DC1"/>
      <node id="916" label="CDC42EP2"/>
      <node id="915" label="CCNJL"/>
      <node id="914" label="DCAF17"/>
      <node id="913" label="CASC4"/>
      <node id="912" label="RPUSD4"/>
      <node id="911" label="GCC1"/>
      <node id="910" label="TMEM220"/>
      <node id="909" label="GLYCTK"/>
      <node id="908" label="RARA"/>
      <node id="907" label="MIEF2"/>
      <node id="906" label="ETFB"/>
      <node id="905" label="FAM96A"/>
      <node id="904" label="ADCK1"/>
      <node id="903" label="SLC37A3"/>
      <node id="902" label="EPB41L4B"/>
      <node id="901" label="SYTL2"/>
      <node id="900" label="SOX9"/>
      <node id="899" label="TMEM80"/>
      <node id="898" label="CNR1"/>
      <node id="897" label="DNAJB2"/>
      <node id="896" label="STEAP1"/>
      <node id="895" label="HDAC4"/>
      <node id="894" label="VAMP4"/>
      <node id="893" label="SLCO4A1"/>
      <node id="892" label="PIAS3"/>
      <node id="891" label="MBTPS2"/>
      <node id="890" label="SLBP"/>
      <node id="889" label="C19orf53"/>
      <node id="888" label="SLC35A2"/>
      <node id="887" label="MYSM1"/>
      <node id="886" label="IVD"/>
      <node id="885" label="HCAR2"/>
      <node id="884" label="ITPRIPL2"/>
      <node id="883" label="TTC27"/>
      <node id="882" label="ACBD3"/>
      <node id="881" label="PRR19"/>
      <node id="880" label="PCDHB16"/>
      <node id="879" label="PROS1"/>
      <node id="878" label="EFTUD2"/>
      <node id="877" label="BRD8"/>
      <node id="876" label="RBM39"/>
      <node id="875" label="CSNK2B"/>
      <node id="874" label="PIK3R1"/>
      <node id="873" label="PCDHAC1"/>
      <node id="872" label="MTFR1L"/>
      <node id="871" label="CCDC97"/>
      <node id="870" label="ZNHIT1"/>
      <node id="869" label="TTC33"/>
      <node id="868" label="SOCS6"/>
      <node id="867" label="ZNF567"/>
      <node id="866" label="STAG1"/>
      <node id="865" label="SEPT9"/>
      <node id="864" label="RBBP6"/>
      <node id="863" label="TAF6L"/>
      <node id="862" label="ZSWIM4"/>
      <node id="861" label="TMTC4"/>
      <node id="860" label="DENND6A"/>
      <node id="859" label="WDR83OS"/>
      <node id="858" label="OGT"/>
      <node id="857" label="UBE2L3"/>
      <node id="856" label="POR"/>
      <node id="855" label="ENOPH1"/>
      <node id="854" label="MORC3"/>
      <node id="853" label="BMP4"/>
      <node id="852" label="NFYA"/>
      <node id="851" label="RPL7L1"/>
      <node id="850" label="FN3K"/>
      <node id="849" label="AP1S2"/>
      <node id="848" label="DTX3"/>
      <node id="847" label="TMEM255B"/>
      <node id="846" label="RDH13"/>
      <node id="845" label="EXT1"/>
      <node id="844" label="FNIP2"/>
      <node id="843" label="RRN3"/>
      <node id="842" label="ARMCX5"/>
      <node id="841" label="FAM89A"/>
      <node id="840" label="PPM1A"/>
      <node id="839" label="SLC35D2"/>
      <node id="838" label="MRPL49"/>
      <node id="837" label="ZNF774"/>
      <node id="836" label="C1orf122"/>
      <node id="835" label="FRAS1"/>
      <node id="834" label="PDGFB"/>
      <node id="833" label="GTF2E2"/>
      <node id="832" label="L3MBTL2"/>
      <node id="831" label="RNASEH1"/>
      <node id="830" label="ALS2CL"/>
      <node id="829" label="CTSL"/>
      <node id="828" label="COX15"/>
      <node id="827" label="PHF11"/>
      <node id="826" label="GSK3B"/>
      <node id="825" label="TSC22D4"/>
      <node id="824" label="ADAT1"/>
      <node id="823" label="ACADVL"/>
      <node id="822" label="MIER1"/>
      <node id="821" label="FBXW4"/>
      <node id="820" label="FAT4"/>
      <node id="819" label="AASS"/>
      <node id="818" label="C9orf142"/>
      <node id="817" label="FBXL18"/>
      <node id="816" label="TMEM252"/>
      <node id="815" label="PDCD5"/>
      <node id="814" label="MZT2B"/>
      <node id="813" label="CARD8"/>
      <node id="812" label="DNAJC27"/>
      <node id="811" label="AC004381.6"/>
      <node id="810" label="GREB1"/>
      <node id="809" label="DUSP28"/>
      <node id="808" label="ME2"/>
      <node id="807" label="FKBP1B"/>
      <node id="806" label="ZMYND8"/>
      <node id="805" label="DEPDC7"/>
      <node id="804" label="MPHOSPH9"/>
      <node id="803" label="TLK2"/>
      <node id="802" label="RAC1"/>
      <node id="801" label="EMC6"/>
      <node id="800" label="GCNT3"/>
      <node id="799" label="MKNK2"/>
      <node id="798" label="ANTXR2"/>
      <node id="797" label="RNF213"/>
      <node id="796" label="SLC27A1"/>
      <node id="795" label="CA11"/>
      <node id="794" label="RNF181"/>
      <node id="793" label="ZCCHC11"/>
      <node id="792" label="CACNA1C"/>
      <node id="791" label="THOC2"/>
      <node id="790" label="CDK5RAP1"/>
      <node id="789" label="ARID4A"/>
      <node id="788" label="BSCL2"/>
      <node id="787" label="MAP3K1"/>
      <node id="786" label="TTLL4"/>
      <node id="785" label="ARHGAP33"/>
      <node id="784" label="LYSMD4"/>
      <node id="783" label="TNFRSF11A"/>
      <node id="782" label="RHBDL1"/>
      <node id="781" label="NAGA"/>
      <node id="780" label="SPOPL"/>
      <node id="779" label="TSPAN6"/>
      <node id="778" label="TEFM"/>
      <node id="777" label="SGMS1"/>
      <node id="776" label="ICAM4"/>
      <node id="775" label="CCM2"/>
      <node id="774" label="MPHOSPH10"/>
      <node id="773" label="NT5C2"/>
      <node id="772" label="CLIC6"/>
      <node id="771" label="TMEM68"/>
      <node id="770" label="SRCRB4D"/>
      <node id="769" label="NAIF1"/>
      <node id="768" label="FAM89B"/>
      <node id="767" label="NTSR1"/>
      <node id="766" label="OASL"/>
      <node id="765" label="GYG1"/>
      <node id="764" label="KCNAB2"/>
      <node id="763" label="PECR"/>
      <node id="762" label="ERCC6L"/>
      <node id="761" label="CCDC85A"/>
      <node id="760" label="KLHL29"/>
      <node id="759" label="TFDP2"/>
      <node id="758" label="NUS1"/>
      <node id="757" label="CXorf57"/>
      <node id="756" label="PITPNM1"/>
      <node id="755" label="MORF4L1"/>
      <node id="754" label="NDUFV2"/>
      <node id="753" label="SAMD3"/>
      <node id="752" label="CLINT1"/>
      <node id="751" label="STX7"/>
      <node id="750" label="REEP6"/>
      <node id="749" label="ACTR8"/>
      <node id="748" label="BIRC3"/>
      <node id="747" label="CCDC115"/>
      <node id="746" label="THRAP3"/>
      <node id="745" label="EMC1"/>
      <node id="744" label="COL21A1"/>
      <node id="743" label="C11orf84"/>
      <node id="742" label="BAI2"/>
      <node id="741" label="CCNI"/>
      <node id="740" label="RHOT1"/>
      <node id="739" label="KRT80"/>
      <node id="738" label="UBE2F"/>
      <node id="737" label="OXLD1"/>
      <node id="736" label="CLCN7"/>
      <node id="735" label="HLX"/>
      <node id="734" label="PLXNB2"/>
      <node id="733" label="PTX4"/>
      <node id="732" label="COQ4"/>
      <node id="731" label="VNN2"/>
      <node id="730" label="PRRC2A"/>
      <node id="729" label="HEXB"/>
      <node id="728" label="C16orf72"/>
      <node id="727" label="LPGAT1"/>
      <node id="726" label="SHISA2"/>
      <node id="725" label="CCDC132"/>
      <node id="724" label="HK2"/>
      <node id="723" label="ZNF688"/>
      <node id="722" label="GFM2"/>
      <node id="721" label="ST6GALNAC1"/>
      <node id="720" label="CDAN1"/>
      <node id="719" label="GRIK3"/>
      <node id="718" label="TTC17"/>
      <node id="717" label="PIH1D1"/>
      <node id="716" label="PIP5K1A"/>
      <node id="715" label="FAM172A"/>
      <node id="714" label="IFT140"/>
      <node id="713" label="NKRF"/>
      <node id="712" label="ACTR2"/>
      <node id="711" label="PLA2G6"/>
      <node id="710" label="CYB5R4"/>
      <node id="709" label="TTC1"/>
      <node id="708" label="YY1"/>
      <node id="707" label="DNAJB9"/>
      <node id="706" label="C7orf50"/>
      <node id="705" label="THG1L"/>
      <node id="704" label="BOLA2"/>
      <node id="703" label="ATP6V1H"/>
      <node id="702" label="PPP1R26"/>
      <node id="701" label="RGS14"/>
      <node id="700" label="CRYBG3"/>
      <node id="699" label="AJUBA"/>
      <node id="698" label="ZDHHC24"/>
      <node id="697" label="DNM1"/>
      <node id="696" label="COPS6"/>
      <node id="695" label="CCDC47"/>
      <node id="694" label="SLC29A4"/>
      <node id="693" label="LGALS1"/>
      <node id="692" label="PHF17"/>
      <node id="691" label="TVP23A"/>
      <node id="690" label="EMID1"/>
      <node id="689" label="ZNF182"/>
      <node id="688" label="SEPT7"/>
      <node id="687" label="SMG5"/>
      <node id="686" label="KCNH2"/>
      <node id="685" label="CPNE7"/>
      <node id="684" label="DHFRL1"/>
      <node id="683" label="THOC3"/>
      <node id="682" label="MRPL47"/>
      <node id="681" label="SH3RF1"/>
      <node id="680" label="RAB40A"/>
      <node id="679" label="KIAA1324"/>
      <node id="678" label="PDZRN3"/>
      <node id="677" label="CCT6A"/>
      <node id="676" label="DNM3"/>
      <node id="675" label="DDX39B"/>
      <node id="674" label="ALDH2"/>
      <node id="673" label="ADAMTS1"/>
      <node id="672" label="TMEM108"/>
      <node id="671" label="MUTYH"/>
      <node id="670" label="SPG7"/>
      <node id="669" label="C10orf118"/>
      <node id="668" label="HMGN3"/>
      <node id="667" label="ANKRD45"/>
      <node id="666" label="P2RY8"/>
      <node id="665" label="UAP1L1"/>
      <node id="664" label="RP11-345J4.5"/>
      <node id="663" label="RPAP2"/>
      <node id="662" label="TMEM102"/>
      <node id="661" label="IDS"/>
      <node id="660" label="PDXDC1"/>
      <node id="659" label="SEPT5"/>
      <node id="658" label="PDCL3"/>
      <node id="657" label="UNC45A"/>
      <node id="656" label="TRAPPC3"/>
      <node id="655" label="TNFAIP2"/>
      <node id="654" label="ZNF460"/>
      <node id="653" label="FGF13"/>
      <node id="652" label="HDAC8"/>
      <node id="651" label="DUS4L"/>
      <node id="650" label="BNIP2"/>
      <node id="649" label="CTU2"/>
      <node id="648" label="KCNA6"/>
      <node id="647" label="HELB"/>
      <node id="646" label="JPH2"/>
      <node id="645" label="CNFN"/>
      <node id="644" label="FAIM"/>
      <node id="643" label="NTNG2"/>
      <node id="642" label="TGFB1"/>
      <node id="641" label="RIMS3"/>
      <node id="640" label="UVRAG"/>
      <node id="639" label="PASK"/>
      <node id="638" label="POLR2J"/>
      <node id="637" label="SLC19A3"/>
      <node id="636" label="ZC3HAV1L"/>
      <node id="635" label="C8orf76"/>
      <node id="634" label="TIPARP"/>
      <node id="633" label="ARHGAP9"/>
      <node id="632" label="HSPA13"/>
      <node id="631" label="ZNF575"/>
      <node id="630" label="VTA1"/>
      <node id="629" label="C4orf21"/>
      <node id="628" label="ZBTB8A"/>
      <node id="627" label="LRRC61"/>
      <node id="626" label="HIPK1"/>
      <node id="625" label="SEPP1"/>
      <node id="624" label="SLC38A9"/>
      <node id="623" label="GAB2"/>
      <node id="622" label="RAB30"/>
      <node id="621" label="WDR74"/>
      <node id="620" label="TTC30B"/>
      <node id="619" label="TOR1AIP1"/>
      <node id="618" label="ZMYND19"/>
      <node id="617" label="RARG"/>
      <node id="616" label="NDN"/>
      <node id="615" label="ARHGEF17"/>
      <node id="614" label="EIF2B4"/>
      <node id="613" label="TVP23B"/>
      <node id="612" label="ELK1"/>
      <node id="611" label="KLHL33"/>
      <node id="610" label="SLC16A13"/>
      <node id="609" label="GALNT1"/>
      <node id="608" label="GIPC2"/>
      <node id="607" label="ZBTB46"/>
      <node id="606" label="KSR2"/>
      <node id="605" label="YIPF6"/>
      <node id="604" label="AES"/>
      <node id="603" label="AKAP11"/>
      <node id="602" label="GCA"/>
      <node id="601" label="SSBP4"/>
      <node id="600" label="PNPLA4"/>
      <node id="599" label="ADCY6"/>
      <node id="598" label="STON2"/>
      <node id="597" label="ZFP62"/>
      <node id="596" label="FAM105B"/>
      <node id="595" label="EPHB4"/>
      <node id="594" label="AKAP8L"/>
      <node id="593" label="SUPT5H"/>
      <node id="592" label="ORMDL3"/>
      <node id="591" label="UPRT"/>
      <node id="590" label="DMD"/>
      <node id="589" label="GORAB"/>
      <node id="588" label="SRP19"/>
      <node id="587" label="PPM1K"/>
      <node id="586" label="OAZ3"/>
      <node id="585" label="ZFP1"/>
      <node id="584" label="SYP"/>
      <node id="583" label="CDK11A"/>
      <node id="582" label="MARK4"/>
      <node id="581" label="TFCP2"/>
      <node id="580" label="SF3B14"/>
      <node id="579" label="BRWD1"/>
      <node id="578" label="C4orf3"/>
      <node id="577" label="PRR14"/>
      <node id="576" label="PRUNE"/>
      <node id="575" label="CLEC16A"/>
      <node id="574" label="NADK"/>
      <node id="573" label="DISC1"/>
      <node id="572" label="TCHP"/>
      <node id="571" label="ARFGAP1"/>
      <node id="570" label="RAB11FIP4"/>
      <node id="569" label="FAM212B"/>
      <node id="568" label="MATN3"/>
      <node id="567" label="SLC10A3"/>
      <node id="566" label="GPR89B"/>
      <node id="565" label="AL591479.1"/>
      <node id="564" label="CAPN12"/>
      <node id="563" label="C11orf80"/>
      <node id="562" label="RP2"/>
      <node id="561" label="IGF1"/>
      <node id="560" label="TBC1D14"/>
      <node id="559" label="SNAPIN"/>
      <node id="558" label="ELF3"/>
      <node id="557" label="SETMAR"/>
      <node id="556" label="SSH3"/>
      <node id="555" label="CTAGE5"/>
      <node id="554" label="FAM124A"/>
      <node id="553" label="CRP"/>
      <node id="552" label="NRAP"/>
      <node id="551" label="PPAPDC1B"/>
      <node id="550" label="MIF4GD"/>
      <node id="549" label="ALAS1"/>
      <node id="548" label="PDGFRA"/>
      <node id="547" label="TLK1"/>
      <node id="546" label="EID3"/>
      <node id="545" label="LRRC43"/>
      <node id="544" label="PKLR"/>
      <node id="543" label="G6PC2"/>
      <node id="542" label="OSBPL9"/>
      <node id="541" label="SPRY2"/>
      <node id="540" label="ZNF135"/>
      <node id="539" label="ZNF587B"/>
      <node id="538" label="THBS3"/>
      <node id="537" label="MTHFSD"/>
      <node id="536" label="COL5A3"/>
      <node id="535" label="C16orf95"/>
      <node id="534" label="APOO"/>
      <node id="533" label="TMIE"/>
      <node id="532" label="PLD2"/>
      <node id="531" label="LONRF3"/>
      <node id="530" label="PKNOX1"/>
      <node id="529" label="SNX1"/>
      <node id="528" label="AGGF1"/>
      <node id="527" label="TMLHE"/>
      <node id="526" label="TFAM"/>
      <node id="525" label="SMC3"/>
      <node id="524" label="PSMB10"/>
      <node id="523" label="GOSR2"/>
      <node id="522" label="KLHL41"/>
      <node id="521" label="UBA7"/>
      <node id="520" label="ANKRD36"/>
      <node id="519" label="NFKBID"/>
      <node id="518" label="ZNF467"/>
      <node id="517" label="NOLC1"/>
      <node id="516" label="ANGPTL5"/>
      <node id="515" label="TRIM38"/>
      <node id="514" label="BTG3"/>
      <node id="513" label="CXXC1"/>
      <node id="512" label="PELO"/>
      <node id="511" label="RXRA"/>
      <node id="510" label="CACUL1"/>
      <node id="509" label="ZFAND5"/>
      <node id="508" label="NF2"/>
      <node id="507" label="TFEC"/>
      <node id="506" label="TMCO4"/>
      <node id="505" label="ZNF354B"/>
      <node id="504" label="SETD6"/>
      <node id="503" label="NEDD4L"/>
      <node id="502" label="STK3"/>
      <node id="501" label="TP53BP1"/>
      <node id="500" label="VASH1"/>
      <node id="499" label="MAVS"/>
      <node id="498" label="FAM175B"/>
      <node id="497" label="CAPN1"/>
      <node id="496" label="P2RX5"/>
      <node id="495" label="ID3"/>
      <node id="494" label="MTRF1"/>
      <node id="493" label="ANXA13"/>
      <node id="492" label="LYAR"/>
      <node id="491" label="NFE2L3"/>
      <node id="490" label="DLEU1"/>
      <node id="489" label="BMS1"/>
      <node id="488" label="LRRC8C"/>
      <node id="487" label="CD83"/>
      <node id="486" label="ZNF654"/>
      <node id="485" label="SRSF9"/>
      <node id="484" label="RSG1"/>
      <node id="483" label="LIPA"/>
      <node id="482" label="GLDN"/>
      <node id="481" label="C1orf27"/>
      <node id="480" label="SLC6A20"/>
      <node id="479" label="STAG3"/>
      <node id="478" label="PDGFD"/>
      <node id="477" label="ZFP36L1"/>
      <node id="476" label="ATOX1"/>
      <node id="475" label="ZNF469"/>
      <node id="474" label="IGSF8"/>
      <node id="473" label="GLI4"/>
      <node id="472" label="RAB3D"/>
      <node id="471" label="AC069547.1"/>
      <node id="470" label="RDH11"/>
      <node id="469" label="CDV3"/>
      <node id="468" label="SNX4"/>
      <node id="467" label="SPG20"/>
      <node id="466" label="ZNF521"/>
      <node id="465" label="LYPLAL1"/>
      <node id="464" label="USP19"/>
      <node id="463" label="FAM73B"/>
      <node id="462" label="EHMT1"/>
      <node id="461" label="CAPZA2"/>
      <node id="460" label="ZBED4"/>
      <node id="459" label="FAM53A"/>
      <node id="458" label="CTC-349C3.1"/>
      <node id="457" label="IL15"/>
      <node id="456" label="MLPH"/>
      <node id="455" label="CLEC4A"/>
      <node id="454" label="SCML1"/>
      <node id="453" label="COA3"/>
      <node id="452" label="PPP1R9B"/>
      <node id="451" label="SH3GL3"/>
      <node id="450" label="SIPA1L3"/>
      <node id="449" label="SRRM3"/>
      <node id="448" label="CD7"/>
      <node id="447" label="NMD3"/>
      <node id="446" label="PHACTR4"/>
      <node id="445" label="TOP1MT"/>
      <node id="444" label="PTPN22"/>
      <node id="443" label="RNF7"/>
      <node id="442" label="VEZF1"/>
      <node id="441" label="METTL8"/>
      <node id="440" label="TYMP"/>
      <node id="439" label="BARD1"/>
      <node id="438" label="RASGRP2"/>
      <node id="437" label="ZNF598"/>
      <node id="436" label="BCL7A"/>
      <node id="435" label="AGAP3"/>
      <node id="434" label="REM1"/>
      <node id="433" label="IRF7"/>
      <node id="432" label="NOXA1"/>
      <node id="431" label="STRADA"/>
      <node id="430" label="UBE2Q1"/>
      <node id="429" label="PDP2"/>
      <node id="428" label="POLRMT"/>
      <node id="427" label="USP40"/>
      <node id="426" label="DNASE1L1"/>
      <node id="425" label="FAM187A"/>
      <node id="424" label="TOB1"/>
      <node id="423" label="SHPK"/>
      <node id="422" label="MOB3A"/>
      <node id="421" label="NDUFA9"/>
      <node id="420" label="TPST1"/>
      <node id="419" label="C9orf3"/>
      <node id="418" label="NDUFA13"/>
      <node id="417" label="GOLPH3"/>
      <node id="416" label="TSPAN17"/>
      <node id="415" label="ZNF646"/>
      <node id="414" label="SPDYE3"/>
      <node id="413" label="KBTBD7"/>
      <node id="412" label="APBA2"/>
      <node id="411" label="GRIK4"/>
      <node id="410" label="ITIH3"/>
      <node id="409" label="C1orf174"/>
      <node id="408" label="PNPLA7"/>
      <node id="407" label="PPP4C"/>
      <node id="406" label="ZNF700"/>
      <node id="405" label="KCNIP2"/>
      <node id="404" label="TMEM19"/>
      <node id="403" label="NDUFA10"/>
      <node id="402" label="PPP1R8"/>
      <node id="401" label="UBOX5"/>
      <node id="400" label="ATF3"/>
      <node id="399" label="ZNF75D"/>
      <node id="398" label="GPS1"/>
      <node id="397" label="NME3"/>
      <node id="396" label="NEK10"/>
      <node id="395" label="FRZB"/>
      <node id="394" label="EDN1"/>
      <node id="393" label="GNAI1"/>
      <node id="392" label="TRMT10A"/>
      <node id="391" label="PCF11"/>
      <node id="390" label="CCDC102A"/>
      <node id="389" label="CSK"/>
      <node id="388" label="INO80E"/>
      <node id="387" label="BRPF3"/>
      <node id="386" label="ERP44"/>
      <node id="385" label="USP15"/>
      <node id="384" label="BMPER"/>
      <node id="383" label="PDE10A"/>
      <node id="382" label="FCHSD2"/>
      <node id="381" label="C15orf38-AP3S2"/>
      <node id="380" label="ATP5C1"/>
      <node id="379" label="CLCN4"/>
      <node id="378" label="GJB2"/>
      <node id="377" label="C17orf75"/>
      <node id="376" label="CTGF"/>
      <node id="375" label="ZNF408"/>
      <node id="374" label="ZCCHC9"/>
      <node id="373" label="SNX22"/>
      <node id="372" label="AMN"/>
      <node id="371" label="SLC35B3"/>
      <node id="370" label="CDKN1A"/>
      <node id="369" label="STK32C"/>
      <node id="368" label="KDM2A"/>
      <node id="367" label="EBF1"/>
      <node id="366" label="TMEM131"/>
      <node id="365" label="SPAG9"/>
      <node id="364" label="BLVRA"/>
      <node id="363" label="FAM132B"/>
      <node id="362" label="SMAD4"/>
      <node id="361" label="RTEL1-TNFRSF6B"/>
      <node id="360" label="SDC2"/>
      <node id="359" label="SH3BGRL"/>
      <node id="358" label="ZNF821"/>
      <node id="357" label="DOCK9"/>
      <node id="356" label="LETM1"/>
      <node id="355" label="MARC2"/>
      <node id="354" label="SRRD"/>
      <node id="353" label="FES"/>
      <node id="352" label="R3HCC1"/>
      <node id="351" label="PGM1"/>
      <node id="350" label="MBD4"/>
      <node id="349" label="WDR43"/>
      <node id="348" label="IL17D"/>
      <node id="347" label="MCAT"/>
      <node id="346" label="DNAJC18"/>
      <node id="345" label="DTNA"/>
      <node id="344" label="DTX2"/>
      <node id="343" label="PCP4L1"/>
      <node id="342" label="AGFG2"/>
      <node id="341" label="PDGFA"/>
      <node id="340" label="ATL2"/>
      <node id="339" label="DCLRE1B"/>
      <node id="338" label="UBASH3B"/>
      <node id="337" label="PIGP"/>
      <node id="336" label="FAM78A"/>
      <node id="335" label="BAI3"/>
      <node id="334" label="PACSIN2"/>
      <node id="333" label="CNIH1"/>
      <node id="332" label="F3"/>
      <node id="331" label="HDAC11"/>
      <node id="330" label="PAG1"/>
      <node id="329" label="CCL11"/>
      <node id="328" label="FAAH2"/>
      <node id="327" label="SHISA5"/>
      <node id="326" label="CREBRF"/>
      <node id="325" label="ERLIN1"/>
      <node id="324" label="ATG16L1"/>
      <node id="323" label="SLC25A13"/>
      <node id="322" label="GNS"/>
      <node id="321" label="MAML3"/>
      <node id="320" label="KLRD1"/>
      <node id="319" label="STRIP1"/>
      <node id="318" label="INSIG1"/>
      <node id="317" label="NCS1"/>
      <node id="316" label="NT5DC3"/>
      <node id="315" label="TNKS"/>
      <node id="314" label="SPATC1L"/>
      <node id="313" label="ELL3"/>
      <node id="312" label="RP11-192H23.4"/>
      <node id="311" label="PCNP"/>
      <node id="310" label="PLA2G4C"/>
      <node id="309" label="SEMA3E"/>
      <node id="308" label="PSMA7"/>
      <node id="307" label="C14orf93"/>
      <node id="306" label="FTO"/>
      <node id="305" label="AIG1"/>
      <node id="304" label="RAB13"/>
      <node id="303" label="CAPG"/>
      <node id="302" label="TBCEL"/>
      <node id="301" label="CRYZL1"/>
      <node id="300" label="CRK"/>
      <node id="299" label="ALDH1A1"/>
      <node id="298" label="ZNF33A"/>
      <node id="297" label="DCUN1D1"/>
      <node id="296" label="FCGRT"/>
      <node id="295" label="TFB1M"/>
      <node id="294" label="CTC-479C5.12"/>
      <node id="293" label="SPNS2"/>
      <node id="292" label="MICU1"/>
      <node id="291" label="ZNF793"/>
      <node id="290" label="LSM2"/>
      <node id="289" label="SLC16A11"/>
      <node id="288" label="SETDB1"/>
      <node id="287" label="RPIA"/>
      <node id="286" label="TLR4"/>
      <node id="285" label="TRAP1"/>
      <node id="284" label="DHX57"/>
      <node id="283" label="KCND1"/>
      <node id="282" label="ADNP2"/>
      <node id="281" label="ABHD14A"/>
      <node id="280" label="RAB26"/>
      <node id="279" label="RAB38"/>
      <node id="278" label="CAB39"/>
      <node id="277" label="TTYH2"/>
      <node id="276" label="CTR9"/>
      <node id="275" label="ZNF385A"/>
      <node id="274" label="PDE7B"/>
      <node id="273" label="AKTIP"/>
      <node id="272" label="OSBPL1A"/>
      <node id="271" label="LAPTM4A"/>
      <node id="270" label="FKBP8"/>
      <node id="269" label="EGLN2"/>
      <node id="268" label="CDC42BPG"/>
      <node id="267" label="ARSB"/>
      <node id="266" label="TMUB2"/>
      <node id="265" label="PARP15"/>
      <node id="264" label="ELL"/>
      <node id="263" label="KLHDC2"/>
      <node id="262" label="CHRNB2"/>
      <node id="261" label="MYH11"/>
      <node id="260" label="APOLD1"/>
      <node id="259" label="NCOA2"/>
      <node id="258" label="ACSL1"/>
      <node id="257" label="KCTD13"/>
      <node id="256" label="C17orf59"/>
      <node id="255" label="TNNI2"/>
      <node id="254" label="FAM156A"/>
      <node id="253" label="STK4"/>
      <node id="252" label="ZNF785"/>
      <node id="251" label="NNT"/>
      <node id="250" label="SIPA1L1"/>
      <node id="249" label="RPLP2"/>
      <node id="248" label="WBP2"/>
      <node id="247" label="MRPS21"/>
      <node id="246" label="TBL3"/>
      <node id="245" label="GPR42"/>
      <node id="244" label="SLC20A1"/>
      <node id="243" label="ABCG2"/>
      <node id="242" label="AFF3"/>
      <node id="241" label="ANKRD12"/>
      <node id="240" label="POLL"/>
      <node id="239" label="SNX33"/>
      <node id="238" label="DDB1"/>
      <node id="237" label="NKD2"/>
      <node id="236" label="FAM122C"/>
      <node id="235" label="CREB1"/>
      <node id="234" label="FMN1"/>
      <node id="233" label="MAN2B1"/>
      <node id="232" label="RNF215"/>
      <node id="231" label="TMX2-CTNND1"/>
      <node id="230" label="APLN"/>
      <node id="229" label="TMCC3"/>
      <node id="228" label="CRIP2"/>
      <node id="227" label="TNC"/>
      <node id="226" label="PMS2"/>
      <node id="225" label="C4orf32"/>
      <node id="224" label="ETNK1"/>
      <node id="223" label="WDR6"/>
      <node id="222" label="TAF5L"/>
      <node id="221" label="CCL5"/>
      <node id="220" label="LSM1"/>
      <node id="219" label="NFAT5"/>
      <node id="218" label="NINL"/>
      <node id="217" label="RAB10"/>
      <node id="216" label="TRIM2"/>
      <node id="215" label="APOBEC3D"/>
      <node id="214" label="POLR3GL"/>
      <node id="213" label="FILIP1L"/>
      <node id="212" label="CLMP"/>
      <node id="211" label="SLFNL1"/>
      <node id="210" label="PCOLCE"/>
      <node id="209" label="PAAF1"/>
      <node id="208" label="MKNK1"/>
      <node id="207" label="ADA"/>
      <node id="206" label="ZNF529"/>
      <node id="205" label="EHD1"/>
      <node id="204" label="CDK19"/>
      <node id="203" label="ZNF25"/>
      <node id="202" label="RAC2"/>
      <node id="201" label="RGL1"/>
      <node id="200" label="N4BP2"/>
      <node id="199" label="PCDHGA2"/>
      <node id="198" label="KAT5"/>
      <node id="197" label="POLG"/>
      <node id="196" label="MKS1"/>
      <node id="195" label="ING1"/>
      <node id="194" label="FAM83E"/>
      <node id="193" label="SCRN2"/>
      <node id="192" label="TMEM8B"/>
      <node id="191" label="TRPT1"/>
      <node id="190" label="SUZ12"/>
      <node id="189" label="SLC38A2"/>
      <node id="188" label="TRAM1L1"/>
      <node id="187" label="MAGEH1"/>
      <node id="186" label="GARNL3"/>
      <node id="185" label="COL14A1"/>
      <node id="184" label="ROCK2"/>
      <node id="183" label="NTM"/>
      <node id="182" label="CD80"/>
      <node id="181" label="ESM1"/>
      <node id="180" label="RUSC2"/>
      <node id="179" label="FNTB"/>
      <node id="178" label="DCAF15"/>
      <node id="177" label="STARD4"/>
      <node id="176" label="UBE2D3"/>
      <node id="175" label="SPG21"/>
      <node id="174" label="REEP1"/>
      <node id="173" label="SRSF2"/>
      <node id="172" label="KCNE1"/>
      <node id="171" label="PIN1"/>
      <node id="170" label="FAM168B"/>
      <node id="169" label="MYH9"/>
      <node id="168" label="AP5Z1"/>
      <node id="167" label="CLIC2"/>
      <node id="166" label="C5orf54"/>
      <node id="165" label="MAP1LC3A"/>
      <node id="164" label="SMURF1"/>
      <node id="163" label="MEA1"/>
      <node id="162" label="RNF146"/>
      <node id="161" label="PFKFB3"/>
      <node id="160" label="NCDN"/>
      <node id="159" label="CYP3A5"/>
      <node id="158" label="CDIPT"/>
      <node id="157" label="BLOC1S3"/>
      <node id="156" label="HCCS"/>
      <node id="155" label="GATAD1"/>
      <node id="154" label="POLR3A"/>
      <node id="153" label="ZBTB38"/>
      <node id="152" label="FAM19A4"/>
      <node id="151" label="CYP2J2"/>
      <node id="150" label="CSNK1D"/>
      <node id="149" label="PIP4K2A"/>
      <node id="148" label="IRX5"/>
      <node id="147" label="HOXD1"/>
      <node id="146" label="RFWD2"/>
      <node id="145" label="APOOL"/>
      <node id="144" label="SERHL2"/>
      <node id="143" label="ELN"/>
      <node id="142" label="LRRFIP2"/>
      <node id="141" label="SMIM15"/>
      <node id="140" label="MALSU1"/>
      <node id="139" label="U2AF1"/>
      <node id="138" label="PIDD"/>
      <node id="137" label="RPS6KB2"/>
      <node id="136" label="PAM16"/>
      <node id="135" label="GKAP1"/>
      <node id="134" label="CD14"/>
      <node id="133" label="RHPN1"/>
      <node id="132" label="WDR24"/>
      <node id="131" label="C21orf62"/>
      <node id="130" label="GPN3"/>
      <node id="129" label="PRKRIP1"/>
      <node id="128" label="UBE2I"/>
      <node id="127" label="TBC1D20"/>
      <node id="126" label="STK25"/>
      <node id="125" label="IP6K2"/>
      <node id="124" label="SLC44A3"/>
      <node id="123" label="BST1"/>
      <node id="122" label="NARS"/>
      <node id="121" label="THOC6"/>
      <node id="120" label="ADAM12"/>
      <node id="119" label="CCDC112"/>
      <node id="118" label="CEACAM4"/>
      <node id="117" label="ACN9"/>
      <node id="116" label="P2RY10"/>
      <node id="115" label="AKIRIN2"/>
      <node id="114" label="SMIM10"/>
      <node id="113" label="BEX4"/>
      <edge id="66395" label="XAGE2 (co) XAGE2B" source="7980" target="7979" cy:directed="1"/>
      <edge id="66394" label="XAGE2 (co) XAGE2B" source="7980" target="7979" cy:directed="1"/>
      <edge id="66393" label="GLIPR2 (co) OSM" source="7978" target="7977" cy:directed="1"/>
      <edge id="66392" label="GLIPR2 (co) H2AFY2" source="7978" target="7640" cy:directed="1"/>
      <edge id="66391" label="GLIPR2 (co) OSM" source="7978" target="7977" cy:directed="1"/>
      <edge id="66390" label="GLIPR2 (co) NRN1" source="7978" target="7715" cy:directed="1"/>
      <edge id="66389" label="GLIPR2 (co) SNCA" source="7978" target="7093" cy:directed="1"/>
      <edge id="66388" label="GLIPR2 (co) LIN7A" source="7978" target="6903" cy:directed="1"/>
      <edge id="66387" label="GLIPR2 (co) DOCK2" source="7978" target="7046" cy:directed="1"/>
      <edge id="66386" label="GLIPR2 (co) NCKAP1L" source="7978" target="7425" cy:directed="1"/>
      <edge id="66385" label="GLIPR2 (co) LST1" source="7978" target="7280" cy:directed="1"/>
      <edge id="66384" label="GLIPR2 (co) HCST" source="7978" target="7037" cy:directed="1"/>
      <edge id="66383" label="GLIPR2 (co) SNX20" source="7978" target="6955" cy:directed="1"/>
      <edge id="66382" label="GLIPR2 (co) SH3BP1" source="7978" target="6549" cy:directed="1"/>
      <edge id="66381" label="GLIPR2 (co) LPXN" source="7978" target="5525" cy:directed="1"/>
      <edge id="66380" label="GLIPR2 (co) CD86" source="7978" target="5736" cy:directed="1"/>
      <edge id="66379" label="GLIPR2 (co) MYO1G" source="7978" target="7873" cy:directed="1"/>
      <edge id="66378" label="GLIPR2 (co) IL10RA" source="7978" target="2377" cy:directed="1"/>
      <edge id="66377" label="GLIPR2 (co) SPOCD1" source="7978" target="2292" cy:directed="1"/>
      <edge id="66376" label="GLIPR2 (co) SASH3" source="7978" target="7331" cy:directed="1"/>
      <edge id="66375" label="GLIPR2 (co) FCGR1A" source="7978" target="5168" cy:directed="1"/>
      <edge id="66374" label="GLIPR2 (co) C19orf59" source="7978" target="6615" cy:directed="1"/>
      <edge id="66373" label="GLIPR2 (co) IL12RB1" source="7978" target="1703" cy:directed="1"/>
      <edge id="66372" label="GLIPR2 (co) LAIR1" source="7978" target="5609" cy:directed="1"/>
      <edge id="66371" label="GLIPR2 (co) FCGR1B" source="7978" target="2767" cy:directed="1"/>
      <edge id="66370" label="GLIPR2 (co) LY86" source="7978" target="5415" cy:directed="1"/>
      <edge id="66369" label="GLIPR2 (co) BTK" source="7978" target="6524" cy:directed="1"/>
      <edge id="66368" label="GLIPR2 (co) GALNT6" source="7978" target="2069" cy:directed="1"/>
      <edge id="66367" label="GLIPR2 (co) BID" source="7978" target="1058" cy:directed="1"/>
      <edge id="66366" label="GLIPR2 (co) PLEK" source="7978" target="1646" cy:directed="1"/>
      <edge id="66365" label="GLIPR2 (co) LIMK1" source="7978" target="5238" cy:directed="1"/>
      <edge id="66364" label="GLIPR2 (co) IRF8" source="7978" target="6980" cy:directed="1"/>
      <edge id="66363" label="GLIPR2 (co) TFEC" source="7978" target="507" cy:directed="1"/>
      <edge id="66362" label="GLIPR2 (co) CD53" source="7978" target="6788" cy:directed="1"/>
      <edge id="66361" label="GLIPR2 (co) CLEC4A" source="7978" target="455" cy:directed="1"/>
      <edge id="66360" label="GLIPR2 (co) TNFSF13B" source="7978" target="2248" cy:directed="1"/>
      <edge id="66359" label="GLIPR2 (co) AIF1" source="7978" target="7609" cy:directed="1"/>
      <edge id="66358" label="GLIPR2 (co) CD80" source="7978" target="182" cy:directed="1"/>
      <edge id="66357" label="GLIPR2 (co) CDCP1" source="7978" target="2875" cy:directed="1"/>
      <edge id="66356" label="GLIPR2 (co) FERMT3" source="7978" target="3397" cy:directed="1"/>
      <edge id="66355" label="COX8C (co) AC087645.1" source="7976" target="7975" cy:directed="1"/>
      <edge id="66354" label="COX8C (co) RPL9" source="7976" target="6973" cy:directed="1"/>
      <edge id="66353" label="AC087645.1 (co) CRNN" source="7975" target="7187" cy:directed="1"/>
      <edge id="66352" label="XAGE1B (co) XAGE1D" source="7974" target="7973" cy:directed="1"/>
      <edge id="66351" label="RP11-114H20.1 (co) RP11-363G10.2" source="7972" target="7971" cy:directed="1"/>
      <edge id="66350" label="XAGE1E (co) XAGE1C" source="7970" target="7969" cy:directed="1"/>
      <edge id="66349" label="SPANXA2 (co) SPANXA1" source="7968" target="7967" cy:directed="1"/>
      <edge id="66348" label="C2 (co) LRRK2" source="7966" target="7965" cy:directed="1"/>
      <edge id="66347" label="C2 (co) VEPH1" source="7966" target="7800" cy:directed="1"/>
      <edge id="66346" label="C2 (co) ABCA3" source="7966" target="7843" cy:directed="1"/>
      <edge id="66345" label="C2 (co) PIP5K1B" source="7966" target="7950" cy:directed="1"/>
      <edge id="66344" label="C2 (co) FGFR2" source="7966" target="7660" cy:directed="1"/>
      <edge id="66343" label="C2 (co) MYO1G" source="7966" target="7873" cy:directed="1"/>
      <edge id="66342" label="C2 (co) KIAA1324L" source="7966" target="7882" cy:directed="1"/>
      <edge id="66341" label="C2 (co) KCNJ15" source="7966" target="7533" cy:directed="1"/>
      <edge id="66340" label="C2 (co) LEPREL1" source="7966" target="7849" cy:directed="1"/>
      <edge id="66339" label="C2 (co) MMP28" source="7966" target="7664" cy:directed="1"/>
      <edge id="66338" label="C2 (co) ATP13A4" source="7966" target="7437" cy:directed="1"/>
      <edge id="66337" label="C2 (co) LRRK2" source="7966" target="7965" cy:directed="1"/>
      <edge id="66336" label="C2 (co) GPR116" source="7966" target="7907" cy:directed="1"/>
      <edge id="66335" label="C2 (co) GALNT7" source="7966" target="6697" cy:directed="1"/>
      <edge id="66334" label="C2 (co) HIST1H2BD" source="7966" target="7088" cy:directed="1"/>
      <edge id="66333" label="C2 (co) TBX4" source="7966" target="6050" cy:directed="1"/>
      <edge id="66332" label="C2 (co) C5orf38" source="7966" target="5628" cy:directed="1"/>
      <edge id="66331" label="C2 (co) NDUFS2" source="7966" target="6008" cy:directed="1"/>
      <edge id="66330" label="C2 (co) GPRIN2" source="7966" target="5572" cy:directed="1"/>
      <edge id="66329" label="C2 (co) PGM2L1" source="7966" target="5282" cy:directed="1"/>
      <edge id="66328" label="C2 (co) FAM46B" source="7966" target="7074" cy:directed="1"/>
      <edge id="66327" label="C2 (co) RAP1GAP" source="7966" target="7953" cy:directed="1"/>
      <edge id="66326" label="C2 (co) ALDH7A1" source="7966" target="6514" cy:directed="1"/>
      <edge id="66325" label="C2 (co) LAMP3" source="7966" target="7912" cy:directed="1"/>
      <edge id="66324" label="C2 (co) VEPH1" source="7966" target="7800" cy:directed="1"/>
      <edge id="66323" label="C2 (co) ABCA3" source="7966" target="7843" cy:directed="1"/>
      <edge id="66322" label="C2 (co) PIP5K1B" source="7966" target="7950" cy:directed="1"/>
      <edge id="66321" label="C2 (co) FGFR2" source="7966" target="7660" cy:directed="1"/>
      <edge id="66320" label="C2 (co) KIAA1324L" source="7966" target="7882" cy:directed="1"/>
      <edge id="66319" label="C2 (co) TMEM164" source="7966" target="7463" cy:directed="1"/>
      <edge id="66318" label="C2 (co) CLEC1A" source="7966" target="7636" cy:directed="1"/>
      <edge id="66317" label="C2 (co) POLR2C" source="7966" target="4717" cy:directed="1"/>
      <edge id="66316" label="C2 (co) B3GNT8" source="7966" target="7403" cy:directed="1"/>
      <edge id="66315" label="C2 (co) KCNJ15" source="7966" target="7533" cy:directed="1"/>
      <edge id="66314" label="C2 (co) LEPREL1" source="7966" target="7849" cy:directed="1"/>
      <edge id="66313" label="C2 (co) FAM162B" source="7966" target="5241" cy:directed="1"/>
      <edge id="66312" label="C2 (co) GRHL2" source="7966" target="5054" cy:directed="1"/>
      <edge id="66311" label="C2 (co) MMP28" source="7966" target="7664" cy:directed="1"/>
      <edge id="66310" label="C2 (co) C1orf210" source="7966" target="5617" cy:directed="1"/>
      <edge id="66309" label="C2 (co) PAK6" source="7966" target="5665" cy:directed="1"/>
      <edge id="66308" label="C2 (co) MARVELD3" source="7966" target="5507" cy:directed="1"/>
      <edge id="66307" label="C2 (co) CNRIP1" source="7966" target="7319" cy:directed="1"/>
      <edge id="66306" label="C2 (co) TIE1" source="7966" target="7899" cy:directed="1"/>
      <edge id="66305" label="C2 (co) ATP13A4" source="7966" target="7437" cy:directed="1"/>
      <edge id="66304" label="C2 (co) FHDC1" source="7966" target="5910" cy:directed="1"/>
      <edge id="66303" label="C2 (co) SCD" source="7966" target="5898" cy:directed="1"/>
      <edge id="66302" label="C2 (co) DENND2A" source="7966" target="6444" cy:directed="1"/>
      <edge id="66301" label="C2 (co) ESRP1" source="7966" target="5780" cy:directed="1"/>
      <edge id="66300" label="C2 (co) MFSD2A" source="7966" target="7705" cy:directed="1"/>
      <edge id="66299" label="C2 (co) ALOX15B" source="7966" target="7361" cy:directed="1"/>
      <edge id="66298" label="C2 (co) C1orf116" source="7966" target="7249" cy:directed="1"/>
      <edge id="66297" label="C2 (co) ALPL" source="7966" target="7471" cy:directed="1"/>
      <edge id="66296" label="C2 (co) GUCY1A2" source="7966" target="5000" cy:directed="1"/>
      <edge id="66295" label="C2 (co) ZBTB42" source="7966" target="6013" cy:directed="1"/>
      <edge id="66294" label="C2 (co) PKNOX2" source="7966" target="4648" cy:directed="1"/>
      <edge id="66293" label="C2 (co) SLC25A10" source="7966" target="6031" cy:directed="1"/>
      <edge id="66292" label="C2 (co) GALNT7" source="7966" target="6697" cy:directed="1"/>
      <edge id="66291" label="C2 (co) TFAP2C" source="7966" target="5044" cy:directed="1"/>
      <edge id="66290" label="C2 (co) HIST1H2BD" source="7966" target="7088" cy:directed="1"/>
      <edge id="66289" label="C2 (co) ESYT3" source="7966" target="7772" cy:directed="1"/>
      <edge id="66288" label="C2 (co) PDE5A" source="7966" target="4920" cy:directed="1"/>
      <edge id="66287" label="C2 (co) VWA9" source="7966" target="5695" cy:directed="1"/>
      <edge id="66286" label="C2 (co) TBX2" source="7966" target="4939" cy:directed="1"/>
      <edge id="66285" label="C2 (co) JAM2" source="7966" target="7567" cy:directed="1"/>
      <edge id="66284" label="C2 (co) PLAC9" source="7966" target="7782" cy:directed="1"/>
      <edge id="66283" label="C2 (co) MACROD2" source="7966" target="4781" cy:directed="1"/>
      <edge id="66282" label="C2 (co) SCN4B" source="7966" target="4741" cy:directed="1"/>
      <edge id="66281" label="C2 (co) TNXB" source="7966" target="7661" cy:directed="1"/>
      <edge id="66280" label="C2 (co) RAPGEF4" source="7966" target="7823" cy:directed="1"/>
      <edge id="66279" label="C2 (co) C1orf198" source="7966" target="4901" cy:directed="1"/>
      <edge id="66278" label="C2 (co) TBX4" source="7966" target="6050" cy:directed="1"/>
      <edge id="66277" label="C2 (co) LRRC32" source="7966" target="7274" cy:directed="1"/>
      <edge id="66276" label="C2 (co) STARD9" source="7966" target="4982" cy:directed="1"/>
      <edge id="66275" label="C2 (co) HSD17B6" source="7966" target="6207" cy:directed="1"/>
      <edge id="66274" label="C2 (co) COX7A1" source="7966" target="7208" cy:directed="1"/>
      <edge id="66273" label="C2 (co) ANK3" source="7966" target="7644" cy:directed="1"/>
      <edge id="66272" label="C2 (co) DHCR24" source="7966" target="7911" cy:directed="1"/>
      <edge id="66271" label="C2 (co) ACE" source="7966" target="5803" cy:directed="1"/>
      <edge id="66270" label="C2 (co) FXYD1" source="7966" target="7883" cy:directed="1"/>
      <edge id="66269" label="C2 (co) C5orf38" source="7966" target="5628" cy:directed="1"/>
      <edge id="66268" label="C2 (co) NDUFS2" source="7966" target="6008" cy:directed="1"/>
      <edge id="66267" label="C2 (co) FHL1" source="7966" target="7109" cy:directed="1"/>
      <edge id="66266" label="C2 (co) GPRIN2" source="7966" target="5572" cy:directed="1"/>
      <edge id="66265" label="C2 (co) EFCC1" source="7966" target="5247" cy:directed="1"/>
      <edge id="66264" label="C2 (co) GPR98" source="7966" target="1907" cy:directed="1"/>
      <edge id="66263" label="C2 (co) SLC27A3" source="7966" target="4889" cy:directed="1"/>
      <edge id="66262" label="C2 (co) PGM2L1" source="7966" target="5282" cy:directed="1"/>
      <edge id="66261" label="C2 (co) FAM46B" source="7966" target="7074" cy:directed="1"/>
      <edge id="66260" label="C2 (co) CDH5" source="7966" target="7920" cy:directed="1"/>
      <edge id="66259" label="C2 (co) LSS" source="7966" target="6094" cy:directed="1"/>
      <edge id="66258" label="C2 (co) OCIAD2" source="7966" target="4449" cy:directed="1"/>
      <edge id="66257" label="LRRK2 (co) MCCC2" source="7965" target="7919" cy:directed="1"/>
      <edge id="66256" label="LRRK2 (co) KIAA1324L" source="7965" target="7882" cy:directed="1"/>
      <edge id="66255" label="LRRK2 (co) RAP1GAP" source="7965" target="7953" cy:directed="1"/>
      <edge id="66254" label="LRRK2 (co) SEZ6L2" source="7965" target="7695" cy:directed="1"/>
      <edge id="66253" label="LRRK2 (co) PIP5K1B" source="7965" target="7950" cy:directed="1"/>
      <edge id="66252" label="LRRK2 (co) PRKCQ" source="7965" target="7455" cy:directed="1"/>
      <edge id="66251" label="LRRK2 (co) BEX2" source="7965" target="7903" cy:directed="1"/>
      <edge id="66250" label="LRRK2 (co) CD47" source="7965" target="7134" cy:directed="1"/>
      <edge id="66249" label="LRRK2 (co) MMP28" source="7965" target="7664" cy:directed="1"/>
      <edge id="66248" label="LRRK2 (co) IGSF3" source="7965" target="6972" cy:directed="1"/>
      <edge id="66247" label="LRRK2 (co) SHMT1" source="7965" target="6906" cy:directed="1"/>
      <edge id="66246" label="LRRK2 (co) HSPB8" source="7965" target="7682" cy:directed="1"/>
      <edge id="66245" label="LRRK2 (co) LEPREL1" source="7965" target="7849" cy:directed="1"/>
      <edge id="66244" label="LRRK2 (co) MCCC2" source="7965" target="7919" cy:directed="1"/>
      <edge id="66243" label="LRRK2 (co) KIAA1324L" source="7965" target="7882" cy:directed="1"/>
      <edge id="66242" label="LRRK2 (co) LSS" source="7965" target="6094" cy:directed="1"/>
      <edge id="66241" label="LRRK2 (co) NDUFS2" source="7965" target="6008" cy:directed="1"/>
      <edge id="66240" label="LRRK2 (co) HIST1H2BD" source="7965" target="7088" cy:directed="1"/>
      <edge id="66239" label="LRRK2 (co) MET" source="7965" target="6238" cy:directed="1"/>
      <edge id="66238" label="LRRK2 (co) DUOX1" source="7965" target="7940" cy:directed="1"/>
      <edge id="66237" label="LRRK2 (co) EFEMP2" source="7965" target="7902" cy:directed="1"/>
      <edge id="66236" label="LRRK2 (co) MCCC1" source="7965" target="5605" cy:directed="1"/>
      <edge id="66235" label="LRRK2 (co) GSTA4" source="7965" target="6593" cy:directed="1"/>
      <edge id="66234" label="LRRK2 (co) FGFR2" source="7965" target="7660" cy:directed="1"/>
      <edge id="66233" label="LRRK2 (co) SORBS3" source="7965" target="6682" cy:directed="1"/>
      <edge id="66232" label="LRRK2 (co) TMEM164" source="7965" target="7463" cy:directed="1"/>
      <edge id="66231" label="LRRK2 (co) C14orf1" source="7965" target="7613" cy:directed="1"/>
      <edge id="66230" label="LRRK2 (co) STXBP6" source="7965" target="5768" cy:directed="1"/>
      <edge id="66229" label="LRRK2 (co) KCNJ15" source="7965" target="7533" cy:directed="1"/>
      <edge id="66228" label="LRRK2 (co) SNX25" source="7965" target="7949" cy:directed="1"/>
      <edge id="66227" label="LRRK2 (co) MFSD2A" source="7965" target="7705" cy:directed="1"/>
      <edge id="66226" label="LRRK2 (co) RAP1GAP" source="7965" target="7953" cy:directed="1"/>
      <edge id="66225" label="LRRK2 (co) PAK6" source="7965" target="5665" cy:directed="1"/>
      <edge id="66224" label="LRRK2 (co) SEZ6L2" source="7965" target="7695" cy:directed="1"/>
      <edge id="66223" label="LRRK2 (co) KRTCAP3" source="7965" target="6576" cy:directed="1"/>
      <edge id="66222" label="LRRK2 (co) LAD1" source="7965" target="7346" cy:directed="1"/>
      <edge id="66221" label="LRRK2 (co) GNAI2" source="7965" target="7799" cy:directed="1"/>
      <edge id="66220" label="LRRK2 (co) FHDC1" source="7965" target="5910" cy:directed="1"/>
      <edge id="66219" label="LRRK2 (co) ESRP1" source="7965" target="5780" cy:directed="1"/>
      <edge id="66218" label="LRRK2 (co) ACACA" source="7965" target="4869" cy:directed="1"/>
      <edge id="66217" label="LRRK2 (co) TTC39A" source="7965" target="7763" cy:directed="1"/>
      <edge id="66216" label="LRRK2 (co) HOOK1" source="7965" target="6106" cy:directed="1"/>
      <edge id="66215" label="LRRK2 (co) PIP5K1B" source="7965" target="7950" cy:directed="1"/>
      <edge id="66214" label="LRRK2 (co) TFAP2C" source="7965" target="5044" cy:directed="1"/>
      <edge id="66213" label="LRRK2 (co) MTUS1" source="7965" target="7328" cy:directed="1"/>
      <edge id="66212" label="LRRK2 (co) FEZ1" source="7965" target="7935" cy:directed="1"/>
      <edge id="66211" label="LRRK2 (co) TLCD1" source="7965" target="5020" cy:directed="1"/>
      <edge id="66210" label="LRRK2 (co) SCD" source="7965" target="5898" cy:directed="1"/>
      <edge id="66209" label="LRRK2 (co) DHCR24" source="7965" target="7911" cy:directed="1"/>
      <edge id="66208" label="LRRK2 (co) CDH1" source="7965" target="6565" cy:directed="1"/>
      <edge id="66207" label="LRRK2 (co) LIX1L" source="7965" target="4807" cy:directed="1"/>
      <edge id="66206" label="LRRK2 (co) ANK3" source="7965" target="7644" cy:directed="1"/>
      <edge id="66205" label="LRRK2 (co) RAB25" source="7965" target="6265" cy:directed="1"/>
      <edge id="66204" label="LRRK2 (co) TPD52" source="7965" target="4885" cy:directed="1"/>
      <edge id="66203" label="LRRK2 (co) GRHL2" source="7965" target="5054" cy:directed="1"/>
      <edge id="66202" label="LRRK2 (co) DENND2A" source="7965" target="6444" cy:directed="1"/>
      <edge id="66201" label="LRRK2 (co) GALNT7" source="7965" target="6697" cy:directed="1"/>
      <edge id="66200" label="LRRK2 (co) CNRIP1" source="7965" target="7319" cy:directed="1"/>
      <edge id="66199" label="LRRK2 (co) PRKCQ" source="7965" target="7455" cy:directed="1"/>
      <edge id="66198" label="LRRK2 (co) MARVELD3" source="7965" target="5507" cy:directed="1"/>
      <edge id="66197" label="LRRK2 (co) L2HGDH" source="7965" target="6600" cy:directed="1"/>
      <edge id="66196" label="LRRK2 (co) RHOC" source="7965" target="5983" cy:directed="1"/>
      <edge id="66195" label="LRRK2 (co) ALPL" source="7965" target="7471" cy:directed="1"/>
      <edge id="66194" label="LRRK2 (co) TMEM41A" source="7965" target="6685" cy:directed="1"/>
      <edge id="66193" label="LRRK2 (co) LSR" source="7965" target="4969" cy:directed="1"/>
      <edge id="66192" label="LRRK2 (co) FAM162B" source="7965" target="5241" cy:directed="1"/>
      <edge id="66191" label="LRRK2 (co) BEX2" source="7965" target="7903" cy:directed="1"/>
      <edge id="66190" label="LRRK2 (co) ARHGAP15" source="7965" target="7467" cy:directed="1"/>
      <edge id="66189" label="LRRK2 (co) FAM83H" source="7965" target="5849" cy:directed="1"/>
      <edge id="66188" label="LRRK2 (co) STAT5B" source="7965" target="4888" cy:directed="1"/>
      <edge id="66187" label="LRRK2 (co) C1orf210" source="7965" target="5617" cy:directed="1"/>
      <edge id="66186" label="LRRK2 (co) CD47" source="7965" target="7134" cy:directed="1"/>
      <edge id="66185" label="LRRK2 (co) POLR2C" source="7965" target="4717" cy:directed="1"/>
      <edge id="66184" label="LRRK2 (co) MMP28" source="7965" target="7664" cy:directed="1"/>
      <edge id="66183" label="LRRK2 (co) MRPS23" source="7965" target="5431" cy:directed="1"/>
      <edge id="66182" label="LRRK2 (co) ARHGEF16" source="7965" target="7443" cy:directed="1"/>
      <edge id="66181" label="LRRK2 (co) C1orf116" source="7965" target="7249" cy:directed="1"/>
      <edge id="66180" label="LRRK2 (co) GCNT2" source="7965" target="5604" cy:directed="1"/>
      <edge id="66179" label="LRRK2 (co) RAD1" source="7965" target="3924" cy:directed="1"/>
      <edge id="66178" label="LRRK2 (co) TBX4" source="7965" target="6050" cy:directed="1"/>
      <edge id="66177" label="LRRK2 (co) TNXB" source="7965" target="7661" cy:directed="1"/>
      <edge id="66176" label="LRRK2 (co) RBMS3" source="7965" target="7418" cy:directed="1"/>
      <edge id="66175" label="LRRK2 (co) PLAC9" source="7965" target="7782" cy:directed="1"/>
      <edge id="66174" label="LRRK2 (co) PIP4K2C" source="7965" target="3474" cy:directed="1"/>
      <edge id="66173" label="LRRK2 (co) IGSF3" source="7965" target="6972" cy:directed="1"/>
      <edge id="66172" label="LRRK2 (co) CORO2B" source="7965" target="4241" cy:directed="1"/>
      <edge id="66171" label="LRRK2 (co) RNF43" source="7965" target="4509" cy:directed="1"/>
      <edge id="66170" label="LRRK2 (co) CYGB" source="7965" target="4320" cy:directed="1"/>
      <edge id="66169" label="LRRK2 (co) SHMT1" source="7965" target="6906" cy:directed="1"/>
      <edge id="66168" label="LRRK2 (co) TIE1" source="7965" target="7899" cy:directed="1"/>
      <edge id="66167" label="LRRK2 (co) KCTD14" source="7965" target="6101" cy:directed="1"/>
      <edge id="66166" label="LRRK2 (co) ZEB2" source="7965" target="6953" cy:directed="1"/>
      <edge id="66165" label="LRRK2 (co) HSPB8" source="7965" target="7682" cy:directed="1"/>
      <edge id="66164" label="LRRK2 (co) JAM3" source="7965" target="7517" cy:directed="1"/>
      <edge id="66163" label="LRRK2 (co) STK10" source="7965" target="4791" cy:directed="1"/>
      <edge id="66162" label="LRRK2 (co) CAMK2N1" source="7965" target="4863" cy:directed="1"/>
      <edge id="66161" label="LRRK2 (co) GYPC" source="7965" target="7258" cy:directed="1"/>
      <edge id="66160" label="LRRK2 (co) TNIP1" source="7965" target="6297" cy:directed="1"/>
      <edge id="66159" label="LRRK2 (co) DSC2" source="7965" target="2745" cy:directed="1"/>
      <edge id="66158" label="LRRK2 (co) KIAA1522" source="7965" target="4503" cy:directed="1"/>
      <edge id="66157" label="LRRK2 (co) SLC39A11" source="7965" target="4513" cy:directed="1"/>
      <edge id="66156" label="LRRK2 (co) DARS2" source="7965" target="5173" cy:directed="1"/>
      <edge id="66155" label="LRRK2 (co) COX7A1" source="7965" target="7208" cy:directed="1"/>
      <edge id="66154" label="LRRK2 (co) MSRB3" source="7965" target="7192" cy:directed="1"/>
      <edge id="66153" label="LRRK2 (co) TBX2" source="7965" target="4939" cy:directed="1"/>
      <edge id="66152" label="LRRK2 (co) OCIAD2" source="7965" target="4449" cy:directed="1"/>
      <edge id="66151" label="LRRK2 (co) CLEC1A" source="7965" target="7636" cy:directed="1"/>
      <edge id="66150" label="LRRK2 (co) FXYD1" source="7965" target="7883" cy:directed="1"/>
      <edge id="66149" label="LRRK2 (co) MEF2C" source="7965" target="7225" cy:directed="1"/>
      <edge id="66148" label="LRRK2 (co) MAOB" source="7965" target="4712" cy:directed="1"/>
      <edge id="66147" label="LRRK2 (co) SPINT1" source="7965" target="5985" cy:directed="1"/>
      <edge id="66146" label="LRRK2 (co) HGF" source="7965" target="6862" cy:directed="1"/>
      <edge id="66145" label="LRRK2 (co) DOCK4" source="7965" target="6645" cy:directed="1"/>
      <edge id="66144" label="LRRK2 (co) SOX7" source="7965" target="7961" cy:directed="1"/>
      <edge id="66143" label="LRRK2 (co) LSS" source="7965" target="6094" cy:directed="1"/>
      <edge id="66142" label="LRRK2 (co) TNFRSF1B" source="7965" target="6029" cy:directed="1"/>
      <edge id="66141" label="LRRK2 (co) SYNM" source="7965" target="5949" cy:directed="1"/>
      <edge id="66140" label="LRRK2 (co) KLHL12" source="7965" target="4302" cy:directed="1"/>
      <edge id="66139" label="LRRK2 (co) SLC7A8" source="7965" target="3290" cy:directed="1"/>
      <edge id="66138" label="LRRK2 (co) NDUFS2" source="7965" target="6008" cy:directed="1"/>
      <edge id="66137" label="LRRK2 (co) ZEB1" source="7965" target="4892" cy:directed="1"/>
      <edge id="66136" label="LRRK2 (co) COIL" source="7965" target="4225" cy:directed="1"/>
      <edge id="66135" label="LRRK2 (co) APBB1" source="7965" target="7160" cy:directed="1"/>
      <edge id="66134" label="LRRK2 (co) HIST1H2BD" source="7965" target="7088" cy:directed="1"/>
      <edge id="66133" label="LRRK2 (co) KCTD10" source="7965" target="5713" cy:directed="1"/>
      <edge id="66132" label="LRRK2 (co) HSD17B6" source="7965" target="6207" cy:directed="1"/>
      <edge id="66131" label="LRRK2 (co) MARCKSL1" source="7965" target="4761" cy:directed="1"/>
      <edge id="66130" label="LRRK2 (co) PLSCR4" source="7965" target="5969" cy:directed="1"/>
      <edge id="66129" label="LRRK2 (co) TTPAL" source="7965" target="4369" cy:directed="1"/>
      <edge id="66128" label="LRRK2 (co) FLT4" source="7965" target="6525" cy:directed="1"/>
      <edge id="66127" label="LRRK2 (co) GNG11" source="7965" target="7429" cy:directed="1"/>
      <edge id="66126" label="LRRK2 (co) PCDHGB7" source="7965" target="5825" cy:directed="1"/>
      <edge id="66125" label="LRRK2 (co) COX4I2" source="7965" target="6930" cy:directed="1"/>
      <edge id="66124" label="LRRK2 (co) IARS2" source="7965" target="4184" cy:directed="1"/>
      <edge id="66123" label="LRRK2 (co) MFSD9" source="7965" target="2547" cy:directed="1"/>
      <edge id="66122" label="LRRK2 (co) LMCD1" source="7965" target="6673" cy:directed="1"/>
      <edge id="66121" label="LRRK2 (co) SORBS3" source="7965" target="6682" cy:directed="1"/>
      <edge id="66120" label="LRRK2 (co) HSPB2" source="7965" target="7332" cy:directed="1"/>
      <edge id="66119" label="LRRK2 (co) CPSF3" source="7965" target="6110" cy:directed="1"/>
      <edge id="66118" label="LRRK2 (co) C14orf1" source="7965" target="7613" cy:directed="1"/>
      <edge id="66117" label="LRRK2 (co) PLEKHO2" source="7965" target="7000" cy:directed="1"/>
      <edge id="66116" label="LRRK2 (co) WFDC1" source="7965" target="1024" cy:directed="1"/>
      <edge id="66115" label="LRRK2 (co) MTX2" source="7965" target="3045" cy:directed="1"/>
      <edge id="66114" label="LRRK2 (co) STXBP6" source="7965" target="5768" cy:directed="1"/>
      <edge id="66113" label="LRRK2 (co) BCAT2" source="7965" target="5492" cy:directed="1"/>
      <edge id="66112" label="LRRK2 (co) SLIT3" source="7965" target="4820" cy:directed="1"/>
      <edge id="66111" label="LRRK2 (co) GUCY1A2" source="7965" target="5000" cy:directed="1"/>
      <edge id="66110" label="AC112715.2 (co) AC013449.1" source="7964" target="7963" cy:directed="1"/>
      <edge id="66109" label="AC112715.2 (co) FETUB" source="7964" target="7813" cy:directed="1"/>
      <edge id="66108" label="AC013449.1 (co) HIST1H4B" source="7963" target="7872" cy:directed="1"/>
      <edge id="66107" label="CD93 (co) SOX7" source="7962" target="7961" cy:directed="1"/>
      <edge id="66106" label="CD93 (co) KDR" source="7962" target="7787" cy:directed="1"/>
      <edge id="66105" label="CD93 (co) GPR116" source="7962" target="7907" cy:directed="1"/>
      <edge id="66104" label="CD93 (co) NRN1" source="7962" target="7715" cy:directed="1"/>
      <edge id="66103" label="CD93 (co) KCTD15" source="7962" target="7354" cy:directed="1"/>
      <edge id="66102" label="CD93 (co) TMTC1" source="7962" target="6515" cy:directed="1"/>
      <edge id="66101" label="CD93 (co) SLC16A4" source="7962" target="7318" cy:directed="1"/>
      <edge id="66100" label="CD93 (co) CDH5" source="7962" target="7920" cy:directed="1"/>
      <edge id="66099" label="CD93 (co) ESAM" source="7962" target="7853" cy:directed="1"/>
      <edge id="66098" label="CD93 (co) ETS2" source="7962" target="4264" cy:directed="1"/>
      <edge id="66097" label="CD93 (co) CCDC101" source="7962" target="3651" cy:directed="1"/>
      <edge id="66096" label="CD93 (co) PRKCH" source="7962" target="7278" cy:directed="1"/>
      <edge id="66095" label="CD93 (co) PLCB1" source="7962" target="5036" cy:directed="1"/>
      <edge id="66094" label="CD93 (co) MRPS33" source="7962" target="4582" cy:directed="1"/>
      <edge id="66093" label="CD93 (co) EME1" source="7962" target="6428" cy:directed="1"/>
      <edge id="66092" label="SOX7 (co) STIL" source="7961" target="7635" cy:directed="1"/>
      <edge id="66091" label="SOX7 (co) TNFSF13" source="7961" target="7061" cy:directed="1"/>
      <edge id="66090" label="SOX7 (co) GINS1" source="7961" target="7199" cy:directed="1"/>
      <edge id="66089" label="HNF1B (co) SFTA3" source="7960" target="7959" cy:directed="1"/>
      <edge id="66088" label="HNF1B (co) PLA2G1B" source="7960" target="7803" cy:directed="1"/>
      <edge id="66087" label="HNF1B (co) AQP1" source="7960" target="7593" cy:directed="1"/>
      <edge id="66086" label="HNF1B (co) WIF1" source="7960" target="7569" cy:directed="1"/>
      <edge id="66085" label="HNF1B (co) HHIP" source="7960" target="6795" cy:directed="1"/>
      <edge id="66084" label="HNF1B (co) NPY4R" source="7960" target="6177" cy:directed="1"/>
      <edge id="66083" label="HNF1B (co) MYBPC2" source="7960" target="6128" cy:directed="1"/>
      <edge id="66082" label="HNF1B (co) PLA2G1B" source="7960" target="7803" cy:directed="1"/>
      <edge id="66081" label="HNF1B (co) WIF1" source="7960" target="7569" cy:directed="1"/>
      <edge id="66080" label="SFTA3 (co) SLC46A2" source="7959" target="7769" cy:directed="1"/>
      <edge id="66079" label="SFTA3 (co) SLC30A3" source="7959" target="7185" cy:directed="1"/>
      <edge id="66078" label="SFTA3 (co) HHIP" source="7959" target="6795" cy:directed="1"/>
      <edge id="66077" label="SFTA3 (co) MAP1LC3C" source="7959" target="1099" cy:directed="1"/>
      <edge id="66076" label="VCY1B (co) VCY" source="7958" target="7957" cy:directed="1"/>
      <edge id="66075" label="VSIG2 (co) NKX2-1" source="7956" target="7955" cy:directed="1"/>
      <edge id="66074" label="VSIG2 (co) NKX2-1" source="7956" target="7955" cy:directed="1"/>
      <edge id="66073" label="VSIG2 (co) SUSD2" source="7956" target="7413" cy:directed="1"/>
      <edge id="66072" label="NKX2-1 (co) SUSD2" source="7955" target="7413" cy:directed="1"/>
      <edge id="66071" label="NKX2-1 (co) KCNK3" source="7955" target="7316" cy:directed="1"/>
      <edge id="66070" label="NKX2-1 (co) CLEC3B" source="7955" target="7877" cy:directed="1"/>
      <edge id="66069" label="NKX2-1 (co) TMEM100" source="7955" target="6307" cy:directed="1"/>
      <edge id="66068" label="NKX2-1 (co) KIAA0408" source="7955" target="5169" cy:directed="1"/>
      <edge id="66067" label="NKX2-1 (co) SUSD2" source="7955" target="7413" cy:directed="1"/>
      <edge id="66066" label="NKX2-1 (co) MYOZ1" source="7955" target="3942" cy:directed="1"/>
      <edge id="66065" label="NKX2-1 (co) ATP1B2" source="7955" target="3286" cy:directed="1"/>
      <edge id="66064" label="NKX2-1 (co) BOLA2" source="7955" target="704" cy:directed="1"/>
      <edge id="66063" label="CACNA2D2 (co) RAP1GAP" source="7954" target="7953" cy:directed="1"/>
      <edge id="66062" label="CACNA2D2 (co) SCNN1A" source="7954" target="7892" cy:directed="1"/>
      <edge id="66061" label="CACNA2D2 (co) LRRK2" source="7954" target="7965" cy:directed="1"/>
      <edge id="66060" label="CACNA2D2 (co) PARM1" source="7954" target="7860" cy:directed="1"/>
      <edge id="66059" label="CACNA2D2 (co) C2" source="7954" target="7966" cy:directed="1"/>
      <edge id="66058" label="CACNA2D2 (co) RNF128" source="7954" target="7729" cy:directed="1"/>
      <edge id="66057" label="CACNA2D2 (co) ANK3" source="7954" target="7644" cy:directed="1"/>
      <edge id="66056" label="CACNA2D2 (co) ERBB3" source="7954" target="7400" cy:directed="1"/>
      <edge id="66055" label="CACNA2D2 (co) MMP28" source="7954" target="7664" cy:directed="1"/>
      <edge id="66054" label="CACNA2D2 (co) FGFR2" source="7954" target="7660" cy:directed="1"/>
      <edge id="66053" label="CACNA2D2 (co) DUOX1" source="7954" target="7940" cy:directed="1"/>
      <edge id="66052" label="CACNA2D2 (co) NTN4" source="7954" target="7099" cy:directed="1"/>
      <edge id="66051" label="CACNA2D2 (co) PTPN13" source="7954" target="7830" cy:directed="1"/>
      <edge id="66050" label="CACNA2D2 (co) RAP1GAP" source="7954" target="7953" cy:directed="1"/>
      <edge id="66049" label="CACNA2D2 (co) SDCBP" source="7954" target="7673" cy:directed="1"/>
      <edge id="66048" label="CACNA2D2 (co) LEPREL1" source="7954" target="7849" cy:directed="1"/>
      <edge id="66047" label="CACNA2D2 (co) SNX25" source="7954" target="7949" cy:directed="1"/>
      <edge id="66046" label="CACNA2D2 (co) HIST1H2BD" source="7954" target="7088" cy:directed="1"/>
      <edge id="66045" label="CACNA2D2 (co) FMO5" source="7954" target="7396" cy:directed="1"/>
      <edge id="66044" label="CACNA2D2 (co) C14orf132" source="7954" target="7601" cy:directed="1"/>
      <edge id="66043" label="CACNA2D2 (co) FAM46B" source="7954" target="7074" cy:directed="1"/>
      <edge id="66042" label="CACNA2D2 (co) CAT" source="7954" target="7717" cy:directed="1"/>
      <edge id="66041" label="CACNA2D2 (co) CA2" source="7954" target="6388" cy:directed="1"/>
      <edge id="66040" label="CACNA2D2 (co) EMP3" source="7954" target="6279" cy:directed="1"/>
      <edge id="66039" label="CACNA2D2 (co) DUOXA1" source="7954" target="7931" cy:directed="1"/>
      <edge id="66038" label="CACNA2D2 (co) HYAL1" source="7954" target="6672" cy:directed="1"/>
      <edge id="66037" label="CACNA2D2 (co) C1orf56" source="7954" target="6212" cy:directed="1"/>
      <edge id="66036" label="CACNA2D2 (co) TMEM164" source="7954" target="7463" cy:directed="1"/>
      <edge id="66035" label="CACNA2D2 (co) SCNN1A" source="7954" target="7892" cy:directed="1"/>
      <edge id="66034" label="CACNA2D2 (co) PIP5K1B" source="7954" target="7950" cy:directed="1"/>
      <edge id="66033" label="CACNA2D2 (co) BEX2" source="7954" target="7903" cy:directed="1"/>
      <edge id="66032" label="CACNA2D2 (co) NDUFS2" source="7954" target="6008" cy:directed="1"/>
      <edge id="66031" label="CACNA2D2 (co) SEZ6L2" source="7954" target="7695" cy:directed="1"/>
      <edge id="66030" label="CACNA2D2 (co) KRTCAP3" source="7954" target="6576" cy:directed="1"/>
      <edge id="66029" label="CACNA2D2 (co) PAK6" source="7954" target="5665" cy:directed="1"/>
      <edge id="66028" label="CACNA2D2 (co) TRIM27" source="7954" target="5635" cy:directed="1"/>
      <edge id="66027" label="CACNA2D2 (co) LRRK2" source="7954" target="7965" cy:directed="1"/>
      <edge id="66026" label="CACNA2D2 (co) PARM1" source="7954" target="7860" cy:directed="1"/>
      <edge id="66025" label="CACNA2D2 (co) RAB40C" source="7954" target="5796" cy:directed="1"/>
      <edge id="66024" label="CACNA2D2 (co) CNKSR1" source="7954" target="5217" cy:directed="1"/>
      <edge id="66023" label="CACNA2D2 (co) CAMSAP3" source="7954" target="5134" cy:directed="1"/>
      <edge id="66022" label="CACNA2D2 (co) ADRB2" source="7954" target="7466" cy:directed="1"/>
      <edge id="66021" label="CACNA2D2 (co) C2" source="7954" target="7966" cy:directed="1"/>
      <edge id="66020" label="CACNA2D2 (co) SHE" source="7954" target="7773" cy:directed="1"/>
      <edge id="66019" label="CACNA2D2 (co) AKAP1" source="7954" target="5022" cy:directed="1"/>
      <edge id="66018" label="CACNA2D2 (co) MCCC2" source="7954" target="7919" cy:directed="1"/>
      <edge id="66017" label="CACNA2D2 (co) MET" source="7954" target="6238" cy:directed="1"/>
      <edge id="66016" label="CACNA2D2 (co) CDH1" source="7954" target="6565" cy:directed="1"/>
      <edge id="66015" label="CACNA2D2 (co) AP1M2" source="7954" target="6867" cy:directed="1"/>
      <edge id="66014" label="CACNA2D2 (co) PARN" source="7954" target="4977" cy:directed="1"/>
      <edge id="66013" label="CACNA2D2 (co) ESRP2" source="7954" target="6186" cy:directed="1"/>
      <edge id="66012" label="CACNA2D2 (co) MYO5C" source="7954" target="5352" cy:directed="1"/>
      <edge id="66011" label="CACNA2D2 (co) RNF128" source="7954" target="7729" cy:directed="1"/>
      <edge id="66010" label="CACNA2D2 (co) FAM83H" source="7954" target="5849" cy:directed="1"/>
      <edge id="66009" label="CACNA2D2 (co) CTNNBIP1" source="7954" target="4884" cy:directed="1"/>
      <edge id="66008" label="CACNA2D2 (co) CPM" source="7954" target="7589" cy:directed="1"/>
      <edge id="66007" label="CACNA2D2 (co) ACACA" source="7954" target="4869" cy:directed="1"/>
      <edge id="66006" label="CACNA2D2 (co) EPCAM" source="7954" target="7753" cy:directed="1"/>
      <edge id="66005" label="CACNA2D2 (co) ANK3" source="7954" target="7644" cy:directed="1"/>
      <edge id="66004" label="CACNA2D2 (co) GSTA4" source="7954" target="6593" cy:directed="1"/>
      <edge id="66003" label="CACNA2D2 (co) SNX30" source="7954" target="6411" cy:directed="1"/>
      <edge id="66002" label="CACNA2D2 (co) LITAF" source="7954" target="7819" cy:directed="1"/>
      <edge id="66001" label="CACNA2D2 (co) ZEB2" source="7954" target="6953" cy:directed="1"/>
      <edge id="66000" label="CACNA2D2 (co) DHCR24" source="7954" target="7911" cy:directed="1"/>
      <edge id="65999" label="CACNA2D2 (co) FHDC1" source="7954" target="5910" cy:directed="1"/>
      <edge id="65998" label="CACNA2D2 (co) KANK1" source="7954" target="5445" cy:directed="1"/>
      <edge id="65997" label="CACNA2D2 (co) ZBED3" source="7954" target="6995" cy:directed="1"/>
      <edge id="65996" label="CACNA2D2 (co) VSIG10" source="7954" target="7621" cy:directed="1"/>
      <edge id="65995" label="CACNA2D2 (co) SMAGP" source="7954" target="5493" cy:directed="1"/>
      <edge id="65994" label="CACNA2D2 (co) ARHGAP35" source="7954" target="4681" cy:directed="1"/>
      <edge id="65993" label="CACNA2D2 (co) ZSWIM5" source="7954" target="4622" cy:directed="1"/>
      <edge id="65992" label="CACNA2D2 (co) EHF" source="7954" target="7322" cy:directed="1"/>
      <edge id="65991" label="CACNA2D2 (co) C1orf172" source="7954" target="5735" cy:directed="1"/>
      <edge id="65990" label="CACNA2D2 (co) CA12" source="7954" target="4594" cy:directed="1"/>
      <edge id="65989" label="CACNA2D2 (co) STARD7" source="7954" target="4875" cy:directed="1"/>
      <edge id="65988" label="CACNA2D2 (co) FGF7" source="7954" target="4890" cy:directed="1"/>
      <edge id="65987" label="CACNA2D2 (co) CARD16" source="7954" target="5109" cy:directed="1"/>
      <edge id="65986" label="CACNA2D2 (co) CXADR" source="7954" target="4895" cy:directed="1"/>
      <edge id="65985" label="CACNA2D2 (co) IFI16" source="7954" target="7538" cy:directed="1"/>
      <edge id="65984" label="CACNA2D2 (co) KLF13" source="7954" target="7576" cy:directed="1"/>
      <edge id="65983" label="CACNA2D2 (co) KIAA1522" source="7954" target="4503" cy:directed="1"/>
      <edge id="65982" label="CACNA2D2 (co) SUB1" source="7954" target="4498" cy:directed="1"/>
      <edge id="65981" label="CACNA2D2 (co) TMEM87A" source="7954" target="7696" cy:directed="1"/>
      <edge id="65980" label="CACNA2D2 (co) TMEM116" source="7954" target="6259" cy:directed="1"/>
      <edge id="65979" label="CACNA2D2 (co) FEZ1" source="7954" target="7935" cy:directed="1"/>
      <edge id="65978" label="CACNA2D2 (co) EGFR" source="7954" target="4620" cy:directed="1"/>
      <edge id="65977" label="CACNA2D2 (co) GRHL2" source="7954" target="5054" cy:directed="1"/>
      <edge id="65976" label="CACNA2D2 (co) IGSF3" source="7954" target="6972" cy:directed="1"/>
      <edge id="65975" label="CACNA2D2 (co) PXMP2" source="7954" target="4400" cy:directed="1"/>
      <edge id="65974" label="CACNA2D2 (co) ARHGEF16" source="7954" target="7443" cy:directed="1"/>
      <edge id="65973" label="CACNA2D2 (co) GSDMD" source="7954" target="4380" cy:directed="1"/>
      <edge id="65972" label="CACNA2D2 (co) NKG7" source="7954" target="4596" cy:directed="1"/>
      <edge id="65971" label="CACNA2D2 (co) CNRIP1" source="7954" target="7319" cy:directed="1"/>
      <edge id="65970" label="CACNA2D2 (co) RAB24" source="7954" target="4301" cy:directed="1"/>
      <edge id="65969" label="CACNA2D2 (co) DHTKD1" source="7954" target="4792" cy:directed="1"/>
      <edge id="65968" label="CACNA2D2 (co) ADRA2A" source="7954" target="4290" cy:directed="1"/>
      <edge id="65967" label="CACNA2D2 (co) PRSS16" source="7954" target="4914" cy:directed="1"/>
      <edge id="65966" label="CACNA2D2 (co) KCNJ15" source="7954" target="7533" cy:directed="1"/>
      <edge id="65965" label="CACNA2D2 (co) ERBB3" source="7954" target="7400" cy:directed="1"/>
      <edge id="65964" label="CACNA2D2 (co) FOXA1" source="7954" target="4245" cy:directed="1"/>
      <edge id="65963" label="CACNA2D2 (co) MMP28" source="7954" target="7664" cy:directed="1"/>
      <edge id="65962" label="CACNA2D2 (co) PTGES" source="7954" target="6592" cy:directed="1"/>
      <edge id="65961" label="CACNA2D2 (co) MTUS1" source="7954" target="7328" cy:directed="1"/>
      <edge id="65960" label="CACNA2D2 (co) PIP5KL1" source="7954" target="5565" cy:directed="1"/>
      <edge id="65959" label="CACNA2D2 (co) MAD2L2" source="7954" target="6129" cy:directed="1"/>
      <edge id="65958" label="CACNA2D2 (co) FZD6" source="7954" target="4131" cy:directed="1"/>
      <edge id="65957" label="CACNA2D2 (co) ESRP1" source="7954" target="5780" cy:directed="1"/>
      <edge id="65956" label="CACNA2D2 (co) ITGB6" source="7954" target="6917" cy:directed="1"/>
      <edge id="65955" label="CACNA2D2 (co) SLC2A3" source="7954" target="4035" cy:directed="1"/>
      <edge id="65954" label="CACNA2D2 (co) STRBP" source="7954" target="4031" cy:directed="1"/>
      <edge id="65953" label="CACNA2D2 (co) TMEM245" source="7954" target="4723" cy:directed="1"/>
      <edge id="65952" label="CACNA2D2 (co) MRRF" source="7954" target="3994" cy:directed="1"/>
      <edge id="65951" label="CACNA2D2 (co) DPAGT1" source="7954" target="3993" cy:directed="1"/>
      <edge id="65950" label="CACNA2D2 (co) LSS" source="7954" target="6094" cy:directed="1"/>
      <edge id="65949" label="CACNA2D2 (co) C1orf210" source="7954" target="5617" cy:directed="1"/>
      <edge id="65948" label="CACNA2D2 (co) CASP1" source="7954" target="5686" cy:directed="1"/>
      <edge id="65947" label="CACNA2D2 (co) ABCC6" source="7954" target="5884" cy:directed="1"/>
      <edge id="65946" label="CACNA2D2 (co) CHRD" source="7954" target="6006" cy:directed="1"/>
      <edge id="65945" label="CACNA2D2 (co) POLR3H" source="7954" target="5213" cy:directed="1"/>
      <edge id="65944" label="CACNA2D2 (co) PLCG2" source="7954" target="4360" cy:directed="1"/>
      <edge id="65943" label="CACNA2D2 (co) SLC25A37" source="7954" target="3891" cy:directed="1"/>
      <edge id="65942" label="CACNA2D2 (co) PMP22" source="7954" target="4260" cy:directed="1"/>
      <edge id="65941" label="CACNA2D2 (co) RAB25" source="7954" target="6265" cy:directed="1"/>
      <edge id="65940" label="CACNA2D2 (co) TLCD1" source="7954" target="5020" cy:directed="1"/>
      <edge id="65939" label="CACNA2D2 (co) ST14" source="7954" target="4785" cy:directed="1"/>
      <edge id="65938" label="CACNA2D2 (co) ST3GAL5" source="7954" target="7522" cy:directed="1"/>
      <edge id="65937" label="CACNA2D2 (co) HILPDA" source="7954" target="3748" cy:directed="1"/>
      <edge id="65936" label="CACNA2D2 (co) NTN4" source="7954" target="7099" cy:directed="1"/>
      <edge id="65935" label="CACNA2D2 (co) CHMP4C" source="7954" target="6237" cy:directed="1"/>
      <edge id="65934" label="CACNA2D2 (co) TTC39A" source="7954" target="7763" cy:directed="1"/>
      <edge id="65933" label="CACNA2D2 (co) CDCA7L" source="7954" target="6079" cy:directed="1"/>
      <edge id="65932" label="CACNA2D2 (co) KIAA0895" source="7954" target="3647" cy:directed="1"/>
      <edge id="65931" label="CACNA2D2 (co) PHYHD1" source="7954" target="6923" cy:directed="1"/>
      <edge id="65930" label="CACNA2D2 (co) SDCBP" source="7954" target="7673" cy:directed="1"/>
      <edge id="65929" label="CACNA2D2 (co) MFSD2A" source="7954" target="7705" cy:directed="1"/>
      <edge id="65928" label="CACNA2D2 (co) DCAF11" source="7954" target="4680" cy:directed="1"/>
      <edge id="65927" label="CACNA2D2 (co) C19orf66" source="7954" target="6158" cy:directed="1"/>
      <edge id="65926" label="CACNA2D2 (co) SCIN" source="7954" target="7760" cy:directed="1"/>
      <edge id="65925" label="CACNA2D2 (co) PIGS" source="7954" target="3590" cy:directed="1"/>
      <edge id="65924" label="CACNA2D2 (co) CSTF3" source="7954" target="3552" cy:directed="1"/>
      <edge id="65923" label="CACNA2D2 (co) RASAL3" source="7954" target="4317" cy:directed="1"/>
      <edge id="65922" label="CACNA2D2 (co) SCD" source="7954" target="5898" cy:directed="1"/>
      <edge id="65921" label="CACNA2D2 (co) LIX1L" source="7954" target="4807" cy:directed="1"/>
      <edge id="65920" label="CACNA2D2 (co) DERA" source="7954" target="6543" cy:directed="1"/>
      <edge id="65919" label="CACNA2D2 (co) CHORDC1" source="7954" target="3468" cy:directed="1"/>
      <edge id="65918" label="CACNA2D2 (co) ALCAM" source="7954" target="6951" cy:directed="1"/>
      <edge id="65917" label="CACNA2D2 (co) MX2" source="7954" target="3464" cy:directed="1"/>
      <edge id="65916" label="CACNA2D2 (co) ARHGAP15" source="7954" target="7467" cy:directed="1"/>
      <edge id="65915" label="CACNA2D2 (co) PCYT2" source="7954" target="4864" cy:directed="1"/>
      <edge id="65914" label="CACNA2D2 (co) GNAI2" source="7954" target="7799" cy:directed="1"/>
      <edge id="65913" label="CACNA2D2 (co) HIST1H2BD" source="7954" target="7088" cy:directed="1"/>
      <edge id="65912" label="CACNA2D2 (co) ADORA2A" source="7954" target="4835" cy:directed="1"/>
      <edge id="65911" label="CACNA2D2 (co) ELMO3" source="7954" target="4122" cy:directed="1"/>
      <edge id="65910" label="CACNA2D2 (co) GRAMD1A" source="7954" target="5198" cy:directed="1"/>
      <edge id="65909" label="CACNA2D2 (co) TFAP2C" source="7954" target="5044" cy:directed="1"/>
      <edge id="65908" label="CACNA2D2 (co) PPL" source="7954" target="3343" cy:directed="1"/>
      <edge id="65907" label="CACNA2D2 (co) TNFRSF1B" source="7954" target="6029" cy:directed="1"/>
      <edge id="65906" label="CACNA2D2 (co) HNRNPC" source="7954" target="4910" cy:directed="1"/>
      <edge id="65905" label="CACNA2D2 (co) PRKCQ" source="7954" target="7455" cy:directed="1"/>
      <edge id="65904" label="CACNA2D2 (co) VPS4B" source="7954" target="6466" cy:directed="1"/>
      <edge id="65903" label="CACNA2D2 (co) SLC7A8" source="7954" target="3290" cy:directed="1"/>
      <edge id="65902" label="CACNA2D2 (co) DBT" source="7954" target="6579" cy:directed="1"/>
      <edge id="65901" label="CACNA2D2 (co) RCN1" source="7954" target="3267" cy:directed="1"/>
      <edge id="65900" label="CACNA2D2 (co) MALL" source="7954" target="6606" cy:directed="1"/>
      <edge id="65899" label="CACNA2D2 (co) STK10" source="7954" target="4791" cy:directed="1"/>
      <edge id="65898" label="CACNA2D2 (co) SLC27A3" source="7954" target="4889" cy:directed="1"/>
      <edge id="65897" label="CACNA2D2 (co) ERO1L" source="7954" target="7672" cy:directed="1"/>
      <edge id="65896" label="CACNA2D2 (co) HIF1AN" source="7954" target="6183" cy:directed="1"/>
      <edge id="65895" label="CACNA2D2 (co) ZNF275" source="7954" target="3196" cy:directed="1"/>
      <edge id="65894" label="CACNA2D2 (co) C1orf116" source="7954" target="7249" cy:directed="1"/>
      <edge id="65893" label="CACNA2D2 (co) PSME1" source="7954" target="3162" cy:directed="1"/>
      <edge id="65892" label="CACNA2D2 (co) TGFBRAP1" source="7954" target="3660" cy:directed="1"/>
      <edge id="65891" label="CACNA2D2 (co) LRRC8E" source="7954" target="3099" cy:directed="1"/>
      <edge id="65890" label="CACNA2D2 (co) PTPRC" source="7954" target="6142" cy:directed="1"/>
      <edge id="65889" label="CACNA2D2 (co) SEPT6" source="7954" target="3091" cy:directed="1"/>
      <edge id="65888" label="CACNA2D2 (co) TMEM176A" source="7954" target="5657" cy:directed="1"/>
      <edge id="65887" label="CACNA2D2 (co) KLF5" source="7954" target="3052" cy:directed="1"/>
      <edge id="65886" label="CACNA2D2 (co) ZBTB24" source="7954" target="3048" cy:directed="1"/>
      <edge id="65885" label="CACNA2D2 (co) GAS2L1" source="7954" target="3028" cy:directed="1"/>
      <edge id="65884" label="CACNA2D2 (co) ETV1" source="7954" target="7568" cy:directed="1"/>
      <edge id="65883" label="CACNA2D2 (co) ZSCAN25" source="7954" target="3571" cy:directed="1"/>
      <edge id="65882" label="CACNA2D2 (co) SLC39A10" source="7954" target="5907" cy:directed="1"/>
      <edge id="65881" label="CACNA2D2 (co) MCTP2" source="7954" target="2949" cy:directed="1"/>
      <edge id="65880" label="CACNA2D2 (co) RASA3" source="7954" target="4501" cy:directed="1"/>
      <edge id="65879" label="CACNA2D2 (co) RNF43" source="7954" target="4509" cy:directed="1"/>
      <edge id="65878" label="CACNA2D2 (co) HSD17B6" source="7954" target="6207" cy:directed="1"/>
      <edge id="65877" label="CACNA2D2 (co) MARCH5" source="7954" target="5861" cy:directed="1"/>
      <edge id="65876" label="CACNA2D2 (co) MARCKSL1" source="7954" target="4761" cy:directed="1"/>
      <edge id="65875" label="CACNA2D2 (co) ACAT2" source="7954" target="6266" cy:directed="1"/>
      <edge id="65874" label="CACNA2D2 (co) C14orf132" source="7954" target="7601" cy:directed="1"/>
      <edge id="65873" label="CACNA2D2 (co) FAM76A" source="7954" target="2768" cy:directed="1"/>
      <edge id="65872" label="CACNA2D2 (co) SAFB" source="7954" target="5823" cy:directed="1"/>
      <edge id="65871" label="CACNA2D2 (co) MAN1C1" source="7954" target="5464" cy:directed="1"/>
      <edge id="65870" label="CACNA2D2 (co) SC5D" source="7954" target="3974" cy:directed="1"/>
      <edge id="65869" label="CACNA2D2 (co) CBS" source="7954" target="3844" cy:directed="1"/>
      <edge id="65868" label="CACNA2D2 (co) TMEM176B" source="7954" target="2729" cy:directed="1"/>
      <edge id="65867" label="CACNA2D2 (co) FAM46B" source="7954" target="7074" cy:directed="1"/>
      <edge id="65866" label="CACNA2D2 (co) DHCR7" source="7954" target="3248" cy:directed="1"/>
      <edge id="65865" label="CACNA2D2 (co) PKIG" source="7954" target="5895" cy:directed="1"/>
      <edge id="65864" label="CACNA2D2 (co) HSPB8" source="7954" target="7682" cy:directed="1"/>
      <edge id="65863" label="CACNA2D2 (co) ATXN2" source="7954" target="3424" cy:directed="1"/>
      <edge id="65862" label="CACNA2D2 (co) TCIRG1" source="7954" target="2664" cy:directed="1"/>
      <edge id="65861" label="CACNA2D2 (co) HOOK1" source="7954" target="6106" cy:directed="1"/>
      <edge id="65860" label="CACNA2D2 (co) CYTIP" source="7954" target="4413" cy:directed="1"/>
      <edge id="65859" label="CACNA2D2 (co) CCDC94" source="7954" target="4861" cy:directed="1"/>
      <edge id="65858" label="CACNA2D2 (co) TRIM24" source="7954" target="5158" cy:directed="1"/>
      <edge id="65857" label="CACNA2D2 (co) BDH1" source="7954" target="4703" cy:directed="1"/>
      <edge id="65856" label="CACNA2D2 (co) CAT" source="7954" target="7717" cy:directed="1"/>
      <edge id="65855" label="CACNA2D2 (co) SQLE" source="7954" target="2894" cy:directed="1"/>
      <edge id="65854" label="CACNA2D2 (co) LAD1" source="7954" target="7346" cy:directed="1"/>
      <edge id="65853" label="CACNA2D2 (co) SPINT1" source="7954" target="5985" cy:directed="1"/>
      <edge id="65852" label="CACNA2D2 (co) GCNT2" source="7954" target="5604" cy:directed="1"/>
      <edge id="65851" label="CACNA2D2 (co) SP140" source="7954" target="2882" cy:directed="1"/>
      <edge id="65850" label="CACNA2D2 (co) G0S2" source="7954" target="3426" cy:directed="1"/>
      <edge id="65849" label="CACNA2D2 (co) UBE2Z" source="7954" target="2432" cy:directed="1"/>
      <edge id="65848" label="CACNA2D2 (co) SOX7" source="7954" target="7961" cy:directed="1"/>
      <edge id="65847" label="CACNA2D2 (co) CA2" source="7954" target="6388" cy:directed="1"/>
      <edge id="65846" label="CACNA2D2 (co) R3HDM4" source="7954" target="6115" cy:directed="1"/>
      <edge id="65845" label="CACNA2D2 (co) CLP1" source="7954" target="3951" cy:directed="1"/>
      <edge id="65844" label="CACNA2D2 (co) ZNF207" source="7954" target="5305" cy:directed="1"/>
      <edge id="65843" label="CACNA2D2 (co) RNF26" source="7954" target="2320" cy:directed="1"/>
      <edge id="65842" label="CACNA2D2 (co) SLC29A2" source="7954" target="5045" cy:directed="1"/>
      <edge id="65841" label="CACNA2D2 (co) EMP3" source="7954" target="6279" cy:directed="1"/>
      <edge id="65840" label="CACNA2D2 (co) POLB" source="7954" target="4006" cy:directed="1"/>
      <edge id="65839" label="CACNA2D2 (co) GTF3C4" source="7954" target="5648" cy:directed="1"/>
      <edge id="65838" label="CACNA2D2 (co) VMP1" source="7954" target="4092" cy:directed="1"/>
      <edge id="65837" label="CACNA2D2 (co) FAM160A1" source="7954" target="5966" cy:directed="1"/>
      <edge id="65836" label="CACNA2D2 (co) FGGY" source="7954" target="6801" cy:directed="1"/>
      <edge id="65835" label="CACNA2D2 (co) OPLAH" source="7954" target="2097" cy:directed="1"/>
      <edge id="65834" label="CACNA2D2 (co) PLLP" source="7954" target="7820" cy:directed="1"/>
      <edge id="65833" label="CACNA2D2 (co) CERKL" source="7954" target="2066" cy:directed="1"/>
      <edge id="65832" label="CACNA2D2 (co) HYAL1" source="7954" target="6672" cy:directed="1"/>
      <edge id="65831" label="CACNA2D2 (co) RBMS3" source="7954" target="7418" cy:directed="1"/>
      <edge id="65830" label="CACNA2D2 (co) FKBP4" source="7954" target="6626" cy:directed="1"/>
      <edge id="65829" label="CACNA2D2 (co) C1orf56" source="7954" target="6212" cy:directed="1"/>
      <edge id="65828" label="CACNA2D2 (co) JAZF1" source="7954" target="2021" cy:directed="1"/>
      <edge id="65827" label="CACNA2D2 (co) GEM" source="7954" target="1990" cy:directed="1"/>
      <edge id="65826" label="CACNA2D2 (co) C2ORF15" source="7954" target="6271" cy:directed="1"/>
      <edge id="65825" label="CACNA2D2 (co) DLG4" source="7954" target="4608" cy:directed="1"/>
      <edge id="65824" label="CACNA2D2 (co) DLX4" source="7954" target="2255" cy:directed="1"/>
      <edge id="65823" label="CACNA2D2 (co) RUNX1" source="7954" target="2763" cy:directed="1"/>
      <edge id="65822" label="CACNA2D2 (co) PAPOLA" source="7954" target="4382" cy:directed="1"/>
      <edge id="65821" label="CACNA2D2 (co) FGF2" source="7954" target="7913" cy:directed="1"/>
      <edge id="65820" label="CACNA2D2 (co) EFEMP2" source="7954" target="7902" cy:directed="1"/>
      <edge id="65819" label="CACNA2D2 (co) NCKAP5L" source="7954" target="3016" cy:directed="1"/>
      <edge id="65818" label="CACNA2D2 (co) GRTP1" source="7954" target="2221" cy:directed="1"/>
      <edge id="65817" label="CACNA2D2 (co) H1F0" source="7954" target="2329" cy:directed="1"/>
      <edge id="65816" label="CACNA2D2 (co) OCIAD2" source="7954" target="4449" cy:directed="1"/>
      <edge id="65815" label="CACNA2D2 (co) LILRB3" source="7954" target="3931" cy:directed="1"/>
      <edge id="65814" label="CACNA2D2 (co) S100A14" source="7954" target="7541" cy:directed="1"/>
      <edge id="65813" label="CACNA2D2 (co) MTFR1" source="7954" target="2238" cy:directed="1"/>
      <edge id="65812" label="CACNA2D2 (co) CLPTM1L" source="7954" target="5882" cy:directed="1"/>
      <edge id="65811" label="CACNA2D2 (co) BCL2A1" source="7954" target="6470" cy:directed="1"/>
      <edge id="65810" label="CACNA2D2 (co) DENND2A" source="7954" target="6444" cy:directed="1"/>
      <edge id="65809" label="CACNA2D2 (co) INPP5D" source="7954" target="3075" cy:directed="1"/>
      <edge id="65808" label="CACNA2D2 (co) TRMT2B" source="7954" target="3579" cy:directed="1"/>
      <edge id="65807" label="CACNA2D2 (co) HDAC1" source="7954" target="7542" cy:directed="1"/>
      <edge id="65806" label="CACNA2D2 (co) NIPAL3" source="7954" target="5388" cy:directed="1"/>
      <edge id="65805" label="CACNA2D2 (co) CD47" source="7954" target="7134" cy:directed="1"/>
      <edge id="65804" label="CACNA2D2 (co) CLIC4" source="7954" target="5151" cy:directed="1"/>
      <edge id="65803" label="CACNA2D2 (co) CAMK2D" source="7954" target="1433" cy:directed="1"/>
      <edge id="65802" label="CACNA2D2 (co) HID1" source="7954" target="5571" cy:directed="1"/>
      <edge id="65801" label="CACNA2D2 (co) MCTP1" source="7954" target="4392" cy:directed="1"/>
      <edge id="65800" label="CACNA2D2 (co) GSTZ1" source="7954" target="3613" cy:directed="1"/>
      <edge id="65799" label="CACNA2D2 (co) EZH2" source="7954" target="6168" cy:directed="1"/>
      <edge id="65798" label="CACNA2D2 (co) CLDN4" source="7954" target="4605" cy:directed="1"/>
      <edge id="65797" label="CACNA2D2 (co) UBE2B" source="7954" target="1380" cy:directed="1"/>
      <edge id="65796" label="CACNA2D2 (co) GYLTL1B" source="7954" target="7807" cy:directed="1"/>
      <edge id="65795" label="CACNA2D2 (co) CXCL12" source="7954" target="1950" cy:directed="1"/>
      <edge id="65794" label="CACNA2D2 (co) IL33" source="7954" target="4858" cy:directed="1"/>
      <edge id="65793" label="CACNA2D2 (co) RAD1" source="7954" target="3924" cy:directed="1"/>
      <edge id="65792" label="CACNA2D2 (co) HSPD1" source="7954" target="4970" cy:directed="1"/>
      <edge id="65791" label="CACNA2D2 (co) PTPRF" source="7954" target="6396" cy:directed="1"/>
      <edge id="65790" label="CACNA2D2 (co) PGM2L1" source="7954" target="5282" cy:directed="1"/>
      <edge id="65789" label="CACNA2D2 (co) AACS" source="7954" target="4617" cy:directed="1"/>
      <edge id="65788" label="CACNA2D2 (co) SLC35E3" source="7954" target="1302" cy:directed="1"/>
      <edge id="65787" label="CACNA2D2 (co) ATRN" source="7954" target="1300" cy:directed="1"/>
      <edge id="65786" label="CACNA2D2 (co) FBXW7" source="7954" target="4808" cy:directed="1"/>
      <edge id="65785" label="CACNA2D2 (co) NDUFS2" source="7954" target="6008" cy:directed="1"/>
      <edge id="65784" label="CACNA2D2 (co) ZEB1" source="7954" target="4892" cy:directed="1"/>
      <edge id="65783" label="CACNA2D2 (co) PIP4K2C" source="7954" target="3474" cy:directed="1"/>
      <edge id="65782" label="CACNA2D2 (co) MYH14" source="7954" target="5834" cy:directed="1"/>
      <edge id="65781" label="CACNA2D2 (co) DTNBP1" source="7954" target="1178" cy:directed="1"/>
      <edge id="65780" label="CACNA2D2 (co) SYNM" source="7954" target="5949" cy:directed="1"/>
      <edge id="65779" label="CACNA2D2 (co) SLC25A10" source="7954" target="6031" cy:directed="1"/>
      <edge id="65778" label="CACNA2D2 (co) SLC39A11" source="7954" target="4513" cy:directed="1"/>
      <edge id="65777" label="CACNA2D2 (co) AIFM1" source="7954" target="5939" cy:directed="1"/>
      <edge id="65776" label="CACNA2D2 (co) FAM162B" source="7954" target="5241" cy:directed="1"/>
      <edge id="65775" label="CACNA2D2 (co) CLK1" source="7954" target="1064" cy:directed="1"/>
      <edge id="65774" label="CACNA2D2 (co) CCNH" source="7954" target="3278" cy:directed="1"/>
      <edge id="65773" label="CACNA2D2 (co) TOM1L1" source="7954" target="4113" cy:directed="1"/>
      <edge id="65772" label="CACNA2D2 (co) HGF" source="7954" target="6862" cy:directed="1"/>
      <edge id="65771" label="CACNA2D2 (co) TMEM140" source="7954" target="2720" cy:directed="1"/>
      <edge id="65770" label="CACNA2D2 (co) PXK" source="7954" target="3789" cy:directed="1"/>
      <edge id="65769" label="CACNA2D2 (co) LTBP4" source="7954" target="5005" cy:directed="1"/>
      <edge id="65768" label="CACNA2D2 (co) DCLRE1A" source="7954" target="6154" cy:directed="1"/>
      <edge id="65767" label="CACNA2D2 (co) TPD52" source="7954" target="4885" cy:directed="1"/>
      <edge id="65766" label="CACNA2D2 (co) MSRB3" source="7954" target="7192" cy:directed="1"/>
      <edge id="65765" label="CACNA2D2 (co) PLSCR4" source="7954" target="5969" cy:directed="1"/>
      <edge id="65764" label="CACNA2D2 (co) PIGM" source="7954" target="5114" cy:directed="1"/>
      <edge id="65763" label="CACNA2D2 (co) CAMK2N1" source="7954" target="4863" cy:directed="1"/>
      <edge id="65762" label="CACNA2D2 (co) MYH10" source="7954" target="5487" cy:directed="1"/>
      <edge id="65761" label="CACNA2D2 (co) NDUFB9" source="7954" target="3824" cy:directed="1"/>
      <edge id="65760" label="CACNA2D2 (co) PHF11" source="7954" target="827" cy:directed="1"/>
      <edge id="65759" label="CACNA2D2 (co) CCNA2" source="7954" target="6373" cy:directed="1"/>
      <edge id="65758" label="CACNA2D2 (co) PRSS8" source="7954" target="7248" cy:directed="1"/>
      <edge id="65757" label="CACNA2D2 (co) PHF6" source="7954" target="4051" cy:directed="1"/>
      <edge id="65756" label="CACNA2D2 (co) TRIM27" source="7954" target="5635" cy:directed="1"/>
      <edge id="65755" label="CACNA2D2 (co) SMG8" source="7954" target="4657" cy:directed="1"/>
      <edge id="65754" label="CACNA2D2 (co) GUCY1A2" source="7954" target="5000" cy:directed="1"/>
      <edge id="65753" label="CACNA2D2 (co) TSPYL5" source="7954" target="7262" cy:directed="1"/>
      <edge id="65752" label="CACNA2D2 (co) LGALSL" source="7954" target="3313" cy:directed="1"/>
      <edge id="65751" label="CACNA2D2 (co) TSEN54" source="7954" target="1451" cy:directed="1"/>
      <edge id="65750" label="CACNA2D2 (co) RAB3GAP2" source="7954" target="5316" cy:directed="1"/>
      <edge id="65749" label="CACNA2D2 (co) MOCS3" source="7954" target="3893" cy:directed="1"/>
      <edge id="65748" label="CACNA2D2 (co) TMEM41A" source="7954" target="6685" cy:directed="1"/>
      <edge id="65747" label="CACNA2D2 (co) TNXB" source="7954" target="7661" cy:directed="1"/>
      <edge id="65746" label="CACNA2D2 (co) MRPS23" source="7954" target="5431" cy:directed="1"/>
      <edge id="65745" label="CACNA2D2 (co) TFE3" source="7954" target="6247" cy:directed="1"/>
      <edge id="65744" label="CACNA2D2 (co) ETS1" source="7954" target="4772" cy:directed="1"/>
      <edge id="65743" label="CACNA2D2 (co) DAPK2" source="7954" target="6764" cy:directed="1"/>
      <edge id="65742" label="CACNA2D2 (co) GNA14" source="7954" target="6731" cy:directed="1"/>
      <edge id="65741" label="CACNA2D2 (co) TMEM209" source="7954" target="3105" cy:directed="1"/>
      <edge id="65740" label="CACNA2D2 (co) RNASEK" source="7954" target="7313" cy:directed="1"/>
      <edge id="65739" label="CACNA2D2 (co) KNTC1" source="7954" target="4709" cy:directed="1"/>
      <edge id="65738" label="CACNA2D2 (co) TFB2M" source="7954" target="6520" cy:directed="1"/>
      <edge id="65737" label="CACNA2D2 (co) ADRB2" source="7954" target="7466" cy:directed="1"/>
      <edge id="65736" label="CACNA2D2 (co) MEFV" source="7954" target="2138" cy:directed="1"/>
      <edge id="65735" label="TP73 (co) ZMYND10" source="7952" target="7951" cy:directed="1"/>
      <edge id="65734" label="TP73 (co) IGSF9" source="7952" target="6676" cy:directed="1"/>
      <edge id="65733" label="TP73 (co) SIX4" source="7952" target="5052" cy:directed="1"/>
      <edge id="65732" label="TP73 (co) PPAP2C" source="7952" target="7927" cy:directed="1"/>
      <edge id="65731" label="ZMYND10 (co) WDR66" source="7951" target="7898" cy:directed="1"/>
      <edge id="65730" label="ZMYND10 (co) TSPAN1" source="7951" target="7812" cy:directed="1"/>
      <edge id="65729" label="ZMYND10 (co) MOK" source="7951" target="6607" cy:directed="1"/>
      <edge id="65728" label="ZMYND10 (co) PPAP2C" source="7951" target="7927" cy:directed="1"/>
      <edge id="65727" label="ZMYND10 (co) SIX1" source="7951" target="6104" cy:directed="1"/>
      <edge id="65726" label="ZMYND10 (co) IFT46" source="7951" target="5192" cy:directed="1"/>
      <edge id="65725" label="ZMYND10 (co) SIX4" source="7951" target="5052" cy:directed="1"/>
      <edge id="65724" label="ZMYND10 (co) IGSF9" source="7951" target="6676" cy:directed="1"/>
      <edge id="65723" label="ZMYND10 (co) CENPM" source="7951" target="3913" cy:directed="1"/>
      <edge id="65722" label="PIP5K1B (co) SNX25" source="7950" target="7949" cy:directed="1"/>
      <edge id="65721" label="PIP5K1B (co) DUOX1" source="7950" target="7940" cy:directed="1"/>
      <edge id="65720" label="PIP5K1B (co) BEX2" source="7950" target="7903" cy:directed="1"/>
      <edge id="65719" label="PIP5K1B (co) EFEMP2" source="7950" target="7902" cy:directed="1"/>
      <edge id="65718" label="PIP5K1B (co) RPS6KA2" source="7950" target="7794" cy:directed="1"/>
      <edge id="65717" label="PIP5K1B (co) FAM105A" source="7950" target="7806" cy:directed="1"/>
      <edge id="65716" label="PIP5K1B (co) ESYT3" source="7950" target="7772" cy:directed="1"/>
      <edge id="65715" label="PIP5K1B (co) EPCAM" source="7950" target="7753" cy:directed="1"/>
      <edge id="65714" label="PIP5K1B (co) KIAA1324L" source="7950" target="7882" cy:directed="1"/>
      <edge id="65713" label="PIP5K1B (co) TTC39A" source="7950" target="7763" cy:directed="1"/>
      <edge id="65712" label="PIP5K1B (co) CPM" source="7950" target="7589" cy:directed="1"/>
      <edge id="65711" label="PIP5K1B (co) HDAC1" source="7950" target="7542" cy:directed="1"/>
      <edge id="65710" label="PIP5K1B (co) RETSAT" source="7950" target="7479" cy:directed="1"/>
      <edge id="65709" label="PIP5K1B (co) B3GNT8" source="7950" target="7403" cy:directed="1"/>
      <edge id="65708" label="PIP5K1B (co) MMP28" source="7950" target="7664" cy:directed="1"/>
      <edge id="65707" label="PIP5K1B (co) LAMP3" source="7950" target="7912" cy:directed="1"/>
      <edge id="65706" label="PIP5K1B (co) CSRP1" source="7950" target="7266" cy:directed="1"/>
      <edge id="65705" label="PIP5K1B (co) AHCYL2" source="7950" target="7263" cy:directed="1"/>
      <edge id="65704" label="PIP5K1B (co) PRSS8" source="7950" target="7248" cy:directed="1"/>
      <edge id="65703" label="PIP5K1B (co) ASAH1" source="7950" target="7259" cy:directed="1"/>
      <edge id="65702" label="PIP5K1B (co) HSPB8" source="7950" target="7682" cy:directed="1"/>
      <edge id="65701" label="PIP5K1B (co) PHYHD1" source="7950" target="6923" cy:directed="1"/>
      <edge id="65700" label="PIP5K1B (co) ITGB6" source="7950" target="6917" cy:directed="1"/>
      <edge id="65699" label="PIP5K1B (co) SNX25" source="7950" target="7949" cy:directed="1"/>
      <edge id="65698" label="PIP5K1B (co) HIST1H2BD" source="7950" target="7088" cy:directed="1"/>
      <edge id="65697" label="PIP5K1B (co) C12orf49" source="7950" target="6842" cy:directed="1"/>
      <edge id="65696" label="PIP5K1B (co) DUOX1" source="7950" target="7940" cy:directed="1"/>
      <edge id="65695" label="PIP5K1B (co) ECHDC3" source="7950" target="6712" cy:directed="1"/>
      <edge id="65694" label="PIP5K1B (co) CDH1" source="7950" target="6565" cy:directed="1"/>
      <edge id="65693" label="PIP5K1B (co) DERA" source="7950" target="6543" cy:directed="1"/>
      <edge id="65692" label="PIP5K1B (co) VEPH1" source="7950" target="7800" cy:directed="1"/>
      <edge id="65691" label="PIP5K1B (co) LEPREL1" source="7950" target="7849" cy:directed="1"/>
      <edge id="65690" label="PIP5K1B (co) DGKA" source="7950" target="6269" cy:directed="1"/>
      <edge id="65689" label="PIP5K1B (co) CHMP4C" source="7950" target="6237" cy:directed="1"/>
      <edge id="65688" label="PIP5K1B (co) EFEMP2" source="7950" target="7902" cy:directed="1"/>
      <edge id="65687" label="PIP5K1B (co) BEX2" source="7950" target="7903" cy:directed="1"/>
      <edge id="65686" label="PIP5K1B (co) CAT" source="7950" target="7717" cy:directed="1"/>
      <edge id="65685" label="PIP5K1B (co) NINJ2" source="7950" target="6097" cy:directed="1"/>
      <edge id="65684" label="PIP5K1B (co) ALPL" source="7950" target="7471" cy:directed="1"/>
      <edge id="65683" label="PIP5K1B (co) MARVELD3" source="7950" target="5507" cy:directed="1"/>
      <edge id="65682" label="PIP5K1B (co) MRPS23" source="7950" target="5431" cy:directed="1"/>
      <edge id="65681" label="PIP5K1B (co) MCCC2" source="7950" target="7919" cy:directed="1"/>
      <edge id="65680" label="PIP5K1B (co) CADM1" source="7950" target="7190" cy:directed="1"/>
      <edge id="65679" label="PIP5K1B (co) TRIM24" source="7950" target="5158" cy:directed="1"/>
      <edge id="65678" label="PIP5K1B (co) APBB1" source="7950" target="7160" cy:directed="1"/>
      <edge id="65677" label="PIP5K1B (co) DHCR24" source="7950" target="7911" cy:directed="1"/>
      <edge id="65676" label="PIP5K1B (co) RPS6KA2" source="7950" target="7794" cy:directed="1"/>
      <edge id="65675" label="PIP5K1B (co) FAM105A" source="7950" target="7806" cy:directed="1"/>
      <edge id="65674" label="PIP5K1B (co) PCCB" source="7950" target="5024" cy:directed="1"/>
      <edge id="65673" label="PIP5K1B (co) ST7" source="7950" target="7372" cy:directed="1"/>
      <edge id="65672" label="PIP5K1B (co) ESYT3" source="7950" target="7772" cy:directed="1"/>
      <edge id="65671" label="PIP5K1B (co) EPCAM" source="7950" target="7753" cy:directed="1"/>
      <edge id="65670" label="PIP5K1B (co) PAK6" source="7950" target="5665" cy:directed="1"/>
      <edge id="65669" label="PIP5K1B (co) LSR" source="7950" target="4969" cy:directed="1"/>
      <edge id="65668" label="PIP5K1B (co) ST3GAL2" source="7950" target="4948" cy:directed="1"/>
      <edge id="65667" label="PIP5K1B (co) DLL4" source="7950" target="7351" cy:directed="1"/>
      <edge id="65666" label="PIP5K1B (co) ESRP1" source="7950" target="5780" cy:directed="1"/>
      <edge id="65665" label="PIP5K1B (co) MYO5C" source="7950" target="5352" cy:directed="1"/>
      <edge id="65664" label="PIP5K1B (co) KIAA1324L" source="7950" target="7882" cy:directed="1"/>
      <edge id="65663" label="PIP5K1B (co) STAT5B" source="7950" target="4888" cy:directed="1"/>
      <edge id="65662" label="PIP5K1B (co) TPD52" source="7950" target="4885" cy:directed="1"/>
      <edge id="65661" label="PIP5K1B (co) RAB25" source="7950" target="6265" cy:directed="1"/>
      <edge id="65660" label="PIP5K1B (co) ADORA2A" source="7950" target="4835" cy:directed="1"/>
      <edge id="65659" label="PIP5K1B (co) FAM83H" source="7950" target="5849" cy:directed="1"/>
      <edge id="65658" label="PIP5K1B (co) BNIP3" source="7950" target="4940" cy:directed="1"/>
      <edge id="65657" label="PIP5K1B (co) FAM46B" source="7950" target="7074" cy:directed="1"/>
      <edge id="65656" label="PIP5K1B (co) NIF3L1" source="7950" target="4798" cy:directed="1"/>
      <edge id="65655" label="PIP5K1B (co) GRHL2" source="7950" target="5054" cy:directed="1"/>
      <edge id="65654" label="PIP5K1B (co) DHTKD1" source="7950" target="4792" cy:directed="1"/>
      <edge id="65653" label="PIP5K1B (co) STK10" source="7950" target="4791" cy:directed="1"/>
      <edge id="65652" label="PIP5K1B (co) ZEB2" source="7950" target="6953" cy:directed="1"/>
      <edge id="65651" label="PIP5K1B (co) TTC39A" source="7950" target="7763" cy:directed="1"/>
      <edge id="65650" label="PIP5K1B (co) CPM" source="7950" target="7589" cy:directed="1"/>
      <edge id="65649" label="PIP5K1B (co) TFAP2C" source="7950" target="5044" cy:directed="1"/>
      <edge id="65648" label="PIP5K1B (co) ALOX15B" source="7950" target="7361" cy:directed="1"/>
      <edge id="65647" label="PIP5K1B (co) HDAC1" source="7950" target="7542" cy:directed="1"/>
      <edge id="65646" label="PIP5K1B (co) KCNK1" source="7950" target="7027" cy:directed="1"/>
      <edge id="65645" label="PIP5K1B (co) RETSAT" source="7950" target="7479" cy:directed="1"/>
      <edge id="65644" label="PIP5K1B (co) ATP13A4" source="7950" target="7437" cy:directed="1"/>
      <edge id="65643" label="PIP5K1B (co) MAP4" source="7950" target="4541" cy:directed="1"/>
      <edge id="65642" label="PIP5K1B (co) B3GNT8" source="7950" target="7403" cy:directed="1"/>
      <edge id="65641" label="PIP5K1B (co) MMP28" source="7950" target="7664" cy:directed="1"/>
      <edge id="65640" label="PIP5K1B (co) ST14" source="7950" target="4785" cy:directed="1"/>
      <edge id="65639" label="PIP5K1B (co) RNF43" source="7950" target="4509" cy:directed="1"/>
      <edge id="65638" label="PIP5K1B (co) SLC39A11" source="7950" target="4513" cy:directed="1"/>
      <edge id="65637" label="PIP5K1B (co) LAMP3" source="7950" target="7912" cy:directed="1"/>
      <edge id="65636" label="PIP5K1B (co) CSRP1" source="7950" target="7266" cy:directed="1"/>
      <edge id="65635" label="PIP5K1B (co) FAXC" source="7950" target="7488" cy:directed="1"/>
      <edge id="65634" label="PIP5K1B (co) AHCYL2" source="7950" target="7263" cy:directed="1"/>
      <edge id="65633" label="PIP5K1B (co) NUP37" source="7950" target="5770" cy:directed="1"/>
      <edge id="65632" label="PIP5K1B (co) PRSS8" source="7950" target="7248" cy:directed="1"/>
      <edge id="65631" label="PIP5K1B (co) ASAH1" source="7950" target="7259" cy:directed="1"/>
      <edge id="65630" label="PIP5K1B (co) RAD1" source="7950" target="3924" cy:directed="1"/>
      <edge id="65629" label="PIP5K1B (co) MTM1" source="7950" target="5547" cy:directed="1"/>
      <edge id="65628" label="PIP5K1B (co) HSPB8" source="7950" target="7682" cy:directed="1"/>
      <edge id="65627" label="PIP5K1B (co) UACA" source="7950" target="4724" cy:directed="1"/>
      <edge id="65626" label="PIP5K1B (co) FH" source="7950" target="3934" cy:directed="1"/>
      <edge id="65625" label="PIP5K1B (co) ARRB2" source="7950" target="6992" cy:directed="1"/>
      <edge id="65624" label="PIP5K1B (co) LAD1" source="7950" target="7346" cy:directed="1"/>
      <edge id="65623" label="PIP5K1B (co) N4BP2L1" source="7950" target="5281" cy:directed="1"/>
      <edge id="65622" label="PIP5K1B (co) MRPL15" source="7950" target="4711" cy:directed="1"/>
      <edge id="65621" label="PIP5K1B (co) PCDH17" source="7950" target="7206" cy:directed="1"/>
      <edge id="65620" label="PIP5K1B (co) PHYHD1" source="7950" target="6923" cy:directed="1"/>
      <edge id="65619" label="PIP5K1B (co) ITGB6" source="7950" target="6917" cy:directed="1"/>
      <edge id="65618" label="PIP5K1B (co) CNRIP1" source="7950" target="7319" cy:directed="1"/>
      <edge id="65617" label="PIP5K1B (co) TNXB" source="7950" target="7661" cy:directed="1"/>
      <edge id="65616" label="PIP5K1B (co) ACE" source="7950" target="5803" cy:directed="1"/>
      <edge id="65615" label="PIP5K1B (co) TTI1" source="7950" target="3304" cy:directed="1"/>
      <edge id="65614" label="PIP5K1B (co) HIST1H2BD" source="7950" target="7088" cy:directed="1"/>
      <edge id="65613" label="PIP5K1B (co) C12orf49" source="7950" target="6842" cy:directed="1"/>
      <edge id="65612" label="PIP5K1B (co) MARCKSL1" source="7950" target="4761" cy:directed="1"/>
      <edge id="65611" label="PIP5K1B (co) FAM162B" source="7950" target="5241" cy:directed="1"/>
      <edge id="65610" label="PIP5K1B (co) NUMB" source="7950" target="6735" cy:directed="1"/>
      <edge id="65609" label="PIP5K1B (co) FLT4" source="7950" target="6525" cy:directed="1"/>
      <edge id="65608" label="PIP5K1B (co) MYH10" source="7950" target="5487" cy:directed="1"/>
      <edge id="65607" label="PIP5K1B (co) L2HGDH" source="7950" target="6600" cy:directed="1"/>
      <edge id="65606" label="PIP5K1B (co) ECHDC3" source="7950" target="6712" cy:directed="1"/>
      <edge id="65605" label="PIP5K1B (co) RFC3" source="7950" target="5883" cy:directed="1"/>
      <edge id="65604" label="PIP5K1B (co) C1orf116" source="7950" target="7249" cy:directed="1"/>
      <edge id="65603" label="PIP5K1B (co) HSD17B6" source="7950" target="6207" cy:directed="1"/>
      <edge id="65602" label="PIP5K1B (co) TRUB2" source="7950" target="5008" cy:directed="1"/>
      <edge id="65601" label="PIP5K1B (co) COL13A1" source="7950" target="3969" cy:directed="1"/>
      <edge id="65600" label="PIP5K1B (co) VSNL1" source="7950" target="6250" cy:directed="1"/>
      <edge id="65599" label="PIP5K1B (co) DARS2" source="7950" target="5173" cy:directed="1"/>
      <edge id="65598" label="PIP5K1B (co) SCN4B" source="7950" target="4741" cy:directed="1"/>
      <edge id="65597" label="PIP5K1B (co) DOLPP1" source="7950" target="4944" cy:directed="1"/>
      <edge id="65596" label="PIP5K1B (co) IGIP" source="7950" target="3294" cy:directed="1"/>
      <edge id="65595" label="PIP5K1B (co) PARS2" source="7950" target="3775" cy:directed="1"/>
      <edge id="65594" label="PIP5K1B (co) C14orf132" source="7950" target="7601" cy:directed="1"/>
      <edge id="65593" label="PIP5K1B (co) PRC1" source="7950" target="7246" cy:directed="1"/>
      <edge id="65592" label="PIP5K1B (co) MRPS12" source="7950" target="6056" cy:directed="1"/>
      <edge id="65591" label="PIP5K1B (co) GUCY1A2" source="7950" target="5000" cy:directed="1"/>
      <edge id="65590" label="PIP5K1B (co) ZCCHC24" source="7950" target="2271" cy:directed="1"/>
      <edge id="65589" label="PIP5K1B (co) AIMP2" source="7950" target="4428" cy:directed="1"/>
      <edge id="65588" label="PIP5K1B (co) SLIT3" source="7950" target="4820" cy:directed="1"/>
      <edge id="65587" label="PIP5K1B (co) COIL" source="7950" target="4225" cy:directed="1"/>
      <edge id="65586" label="PIP5K1B (co) DGKA" source="7950" target="6269" cy:directed="1"/>
      <edge id="65585" label="PIP5K1B (co) ZBTB42" source="7950" target="6013" cy:directed="1"/>
      <edge id="65584" label="PIP5K1B (co) TIE1" source="7950" target="7899" cy:directed="1"/>
      <edge id="65583" label="PIP5K1B (co) PLEKHO2" source="7950" target="7000" cy:directed="1"/>
      <edge id="65582" label="PIP5K1B (co) DSN1" source="7950" target="2563" cy:directed="1"/>
      <edge id="65581" label="PIP5K1B (co) ZEB1" source="7950" target="4892" cy:directed="1"/>
      <edge id="65580" label="PIP5K1B (co) TSFM" source="7950" target="6204" cy:directed="1"/>
      <edge id="65579" label="PIP5K1B (co) PLSCR4" source="7950" target="5969" cy:directed="1"/>
      <edge id="65578" label="PIP5K1B (co) PAXIP1" source="7950" target="3227" cy:directed="1"/>
      <edge id="65577" label="PIP5K1B (co) LAPTM4B" source="7950" target="2130" cy:directed="1"/>
      <edge id="65576" label="PIP5K1B (co) AP1S1" source="7950" target="7304" cy:directed="1"/>
      <edge id="65575" label="PIP5K1B (co) SPTAN1" source="7950" target="6773" cy:directed="1"/>
      <edge id="65574" label="PIP5K1B (co) NARF" source="7950" target="3659" cy:directed="1"/>
      <edge id="65573" label="PIP5K1B (co) CLEC1A" source="7950" target="7636" cy:directed="1"/>
      <edge id="65572" label="PIP5K1B (co) C1QTNF2" source="7950" target="3321" cy:directed="1"/>
      <edge id="65571" label="PIP5K1B (co) SLC27A3" source="7950" target="4889" cy:directed="1"/>
      <edge id="65570" label="PIP5K1B (co) IARS2" source="7950" target="4184" cy:directed="1"/>
      <edge id="65569" label="PIP5K1B (co) POLDIP2" source="7950" target="5348" cy:directed="1"/>
      <edge id="65568" label="PIP5K1B (co) C5orf22" source="7950" target="1321" cy:directed="1"/>
      <edge id="65567" label="PIP5K1B (co) CPSF3" source="7950" target="6110" cy:directed="1"/>
      <edge id="65566" label="PIP5K1B (co) SLC25A10" source="7950" target="6031" cy:directed="1"/>
      <edge id="65565" label="PIP5K1B (co) GPRIN2" source="7950" target="5572" cy:directed="1"/>
      <edge id="65564" label="PIP5K1B (co) CAT" source="7950" target="7717" cy:directed="1"/>
      <edge id="65563" label="PIP5K1B (co) CORO2B" source="7950" target="4241" cy:directed="1"/>
      <edge id="65562" label="PIP5K1B (co) CCDC64" source="7950" target="1187" cy:directed="1"/>
      <edge id="65561" label="PIP5K1B (co) DOCK4" source="7950" target="6645" cy:directed="1"/>
      <edge id="65560" label="PIP5K1B (co) MAOB" source="7950" target="4712" cy:directed="1"/>
      <edge id="65559" label="PIP5K1B (co) SYNM" source="7950" target="5949" cy:directed="1"/>
      <edge id="65558" label="PIP5K1B (co) APOA1BP" source="7950" target="3093" cy:directed="1"/>
      <edge id="65557" label="PIP5K1B (co) CCNA2" source="7950" target="6373" cy:directed="1"/>
      <edge id="65556" label="PIP5K1B (co) C10orf35" source="7950" target="3808" cy:directed="1"/>
      <edge id="65555" label="PIP5K1B (co) MARS2" source="7950" target="3337" cy:directed="1"/>
      <edge id="65554" label="PIP5K1B (co) TRPV2" source="7950" target="6548" cy:directed="1"/>
      <edge id="65553" label="PIP5K1B (co) NINJ2" source="7950" target="6097" cy:directed="1"/>
      <edge id="65552" label="PIP5K1B (co) ALPL" source="7950" target="7471" cy:directed="1"/>
      <edge id="65551" label="PIP5K1B (co) HILPDA" source="7950" target="3748" cy:directed="1"/>
      <edge id="65550" label="PIP5K1B (co) H1F0" source="7950" target="2329" cy:directed="1"/>
      <edge id="65549" label="PIP5K1B (co) BUB1B" source="7950" target="7527" cy:directed="1"/>
      <edge id="65548" label="PIP5K1B (co) SOX4" source="7950" target="4188" cy:directed="1"/>
      <edge id="65547" label="PIP5K1B (co) MEFV" source="7950" target="2138" cy:directed="1"/>
      <edge id="65546" label="PIP5K1B (co) GYPC" source="7950" target="7258" cy:directed="1"/>
      <edge id="65545" label="PIP5K1B (co) MSRB3" source="7950" target="7192" cy:directed="1"/>
      <edge id="65544" label="PIP5K1B (co) GPN1" source="7950" target="3532" cy:directed="1"/>
      <edge id="65543" label="PIP5K1B (co) NEBL" source="7950" target="3826" cy:directed="1"/>
      <edge id="65542" label="PIP5K1B (co) ZNF423" source="7950" target="2898" cy:directed="1"/>
      <edge id="65541" label="PIP5K1B (co) AHCY" source="7950" target="4706" cy:directed="1"/>
      <edge id="65540" label="PIP5K1B (co) CADM1" source="7950" target="7190" cy:directed="1"/>
      <edge id="65539" label="PIP5K1B (co) DENND2A" source="7950" target="6444" cy:directed="1"/>
      <edge id="65538" label="PIP5K1B (co) APBB1" source="7950" target="7160" cy:directed="1"/>
      <edge id="65537" label="PIP5K1B (co) DHCR24" source="7950" target="7911" cy:directed="1"/>
      <edge id="65536" label="SNX25 (co) FAM46B" source="7949" target="7074" cy:directed="1"/>
      <edge id="65535" label="SNX25 (co) DUOX1" source="7949" target="7940" cy:directed="1"/>
      <edge id="65534" label="SNX25 (co) LEPREL1" source="7949" target="7849" cy:directed="1"/>
      <edge id="65533" label="SNX25 (co) PARM1" source="7949" target="7860" cy:directed="1"/>
      <edge id="65532" label="SNX25 (co) MET" source="7949" target="6238" cy:directed="1"/>
      <edge id="65531" label="SNX25 (co) SGPP2" source="7949" target="4789" cy:directed="1"/>
      <edge id="65530" label="SNX25 (co) CXADR" source="7949" target="4895" cy:directed="1"/>
      <edge id="65529" label="SNX25 (co) TRIM24" source="7949" target="5158" cy:directed="1"/>
      <edge id="65528" label="SNX25 (co) LSR" source="7949" target="4969" cy:directed="1"/>
      <edge id="65527" label="SNX25 (co) PLCG2" source="7949" target="4360" cy:directed="1"/>
      <edge id="65526" label="SNX25 (co) GRHL2" source="7949" target="5054" cy:directed="1"/>
      <edge id="65525" label="SNX25 (co) RAP1GAP" source="7949" target="7953" cy:directed="1"/>
      <edge id="65524" label="SNX25 (co) PARN" source="7949" target="4977" cy:directed="1"/>
      <edge id="65523" label="SNX25 (co) DHCR24" source="7949" target="7911" cy:directed="1"/>
      <edge id="65522" label="SNX25 (co) HSPB8" source="7949" target="7682" cy:directed="1"/>
      <edge id="65521" label="SNX25 (co) STK10" source="7949" target="4791" cy:directed="1"/>
      <edge id="65520" label="SNX25 (co) LAD1" source="7949" target="7346" cy:directed="1"/>
      <edge id="65519" label="SNX25 (co) CBS" source="7949" target="3844" cy:directed="1"/>
      <edge id="65518" label="SNX25 (co) FAM46B" source="7949" target="7074" cy:directed="1"/>
      <edge id="65517" label="SNX25 (co) FMNL1" source="7949" target="4756" cy:directed="1"/>
      <edge id="65516" label="SNX25 (co) SOX7" source="7949" target="7961" cy:directed="1"/>
      <edge id="65515" label="SNX25 (co) DHTKD1" source="7949" target="4792" cy:directed="1"/>
      <edge id="65514" label="SNX25 (co) RAD1" source="7949" target="3924" cy:directed="1"/>
      <edge id="65513" label="SNX25 (co) FAM83H" source="7949" target="5849" cy:directed="1"/>
      <edge id="65512" label="SNX25 (co) CXCL12" source="7949" target="1950" cy:directed="1"/>
      <edge id="65511" label="SNX25 (co) CLPTM1L" source="7949" target="5882" cy:directed="1"/>
      <edge id="65510" label="SNX25 (co) C5orf56" source="7949" target="2811" cy:directed="1"/>
      <edge id="65509" label="SNX25 (co) ST14" source="7949" target="4785" cy:directed="1"/>
      <edge id="65508" label="SNX25 (co) GNAI2" source="7949" target="7799" cy:directed="1"/>
      <edge id="65507" label="SNX25 (co) BEND3" source="7949" target="3896" cy:directed="1"/>
      <edge id="65506" label="SNX25 (co) ST3GAL2" source="7949" target="4948" cy:directed="1"/>
      <edge id="65505" label="SNX25 (co) TNXB" source="7949" target="7661" cy:directed="1"/>
      <edge id="65504" label="SNX25 (co) MSRB3" source="7949" target="7192" cy:directed="1"/>
      <edge id="65503" label="SNX25 (co) C1QTNF2" source="7949" target="3321" cy:directed="1"/>
      <edge id="65502" label="SNX25 (co) ARHGAP17" source="7949" target="6969" cy:directed="1"/>
      <edge id="65501" label="SNX25 (co) LITAF" source="7949" target="7819" cy:directed="1"/>
      <edge id="65500" label="SNX25 (co) SYNM" source="7949" target="5949" cy:directed="1"/>
      <edge id="65499" label="SNX25 (co) CPQ" source="7949" target="2190" cy:directed="1"/>
      <edge id="65498" label="CSTL1 (co) C1orf234" source="7948" target="7947" cy:directed="1"/>
      <edge id="65497" label="CSTL1 (co) C1orf234" source="7948" target="7947" cy:directed="1"/>
      <edge id="65496" label="AC138517.1 (co) KIAA1658" source="7946" target="7945" cy:directed="1"/>
      <edge id="65495" label="KIAA1658 (co) UNC5D" source="7945" target="4652" cy:directed="1"/>
      <edge id="65494" label="RP1-139D8.6 (co) IFNL3" source="7944" target="7943" cy:directed="1"/>
      <edge id="65493" label="HMHB1 (co) HIST1H2BB" source="7942" target="7941" cy:directed="1"/>
      <edge id="65492" label="DUOX1 (co) PARM1" source="7940" target="7860" cy:directed="1"/>
      <edge id="65491" label="DUOX1 (co) ZWINT" source="7940" target="7578" cy:directed="1"/>
      <edge id="65490" label="DUOX1 (co) UCK2" source="7940" target="7275" cy:directed="1"/>
      <edge id="65489" label="DUOX1 (co) ERO1L" source="7940" target="7672" cy:directed="1"/>
      <edge id="65488" label="DUOX1 (co) PARM1" source="7940" target="7860" cy:directed="1"/>
      <edge id="65487" label="DUOX1 (co) GNAI2" source="7940" target="7799" cy:directed="1"/>
      <edge id="65486" label="DUOX1 (co) PCDH17" source="7940" target="7206" cy:directed="1"/>
      <edge id="65485" label="DUOX1 (co) LSR" source="7940" target="4969" cy:directed="1"/>
      <edge id="65484" label="DUOX1 (co) C1orf210" source="7940" target="5617" cy:directed="1"/>
      <edge id="65483" label="DUOX1 (co) SELP" source="7940" target="6780" cy:directed="1"/>
      <edge id="65482" label="DUOX1 (co) MSRB3" source="7940" target="7192" cy:directed="1"/>
      <edge id="65481" label="DUOX1 (co) FAM184A" source="7940" target="6876" cy:directed="1"/>
      <edge id="65480" label="DUOX1 (co) ALPL" source="7940" target="7471" cy:directed="1"/>
      <edge id="65479" label="DUOX1 (co) FAM105A" source="7940" target="7806" cy:directed="1"/>
      <edge id="65478" label="DUOX1 (co) LRP2BP" source="7940" target="4162" cy:directed="1"/>
      <edge id="65477" label="DUOX1 (co) ARMC9" source="7940" target="7207" cy:directed="1"/>
      <edge id="65476" label="DUOX1 (co) RASSF3" source="7940" target="3348" cy:directed="1"/>
      <edge id="65475" label="DUOX1 (co) ERO1L" source="7940" target="7672" cy:directed="1"/>
      <edge id="65474" label="MYH3 (co) LIMS2" source="7939" target="7938" cy:directed="1"/>
      <edge id="65473" label="LIMS2 (co) ABCC5" source="7938" target="7826" cy:directed="1"/>
      <edge id="65472" label="LIMS2 (co) FZD4" source="7938" target="7752" cy:directed="1"/>
      <edge id="65471" label="LIMS2 (co) HES1" source="7938" target="7739" cy:directed="1"/>
      <edge id="65470" label="LIMS2 (co) VCP" source="7938" target="7540" cy:directed="1"/>
      <edge id="65469" label="LIMS2 (co) POP5" source="7938" target="7500" cy:directed="1"/>
      <edge id="65468" label="LIMS2 (co) ZCRB1" source="7938" target="7496" cy:directed="1"/>
      <edge id="65467" label="LIMS2 (co) ESR1" source="7938" target="7583" cy:directed="1"/>
      <edge id="65466" label="LIMS2 (co) MAGED2" source="7938" target="7412" cy:directed="1"/>
      <edge id="65465" label="LIMS2 (co) ILVBL" source="7938" target="7349" cy:directed="1"/>
      <edge id="65464" label="LIMS2 (co) GHR" source="7938" target="7917" cy:directed="1"/>
      <edge id="65463" label="LIMS2 (co) VANGL2" source="7938" target="7153" cy:directed="1"/>
      <edge id="65462" label="LIMS2 (co) VASN" source="7938" target="6877" cy:directed="1"/>
      <edge id="65461" label="LIMS2 (co) EFS" source="7938" target="7681" cy:directed="1"/>
      <edge id="65460" label="LIMS2 (co) FRMD4A" source="7938" target="5389" cy:directed="1"/>
      <edge id="65459" label="LIMS2 (co) SLC9A3R2" source="7938" target="6090" cy:directed="1"/>
      <edge id="65458" label="LIMS2 (co) NDRG4" source="7938" target="7119" cy:directed="1"/>
      <edge id="65457" label="LIMS2 (co) C1orf115" source="7938" target="4490" cy:directed="1"/>
      <edge id="65456" label="LIMS2 (co) HSPA12B" source="7938" target="6750" cy:directed="1"/>
      <edge id="65455" label="LIMS2 (co) USHBP1" source="7938" target="7841" cy:directed="1"/>
      <edge id="65454" label="LIMS2 (co) EML1" source="7938" target="4398" cy:directed="1"/>
      <edge id="65453" label="LIMS2 (co) SMAD6" source="7938" target="4397" cy:directed="1"/>
      <edge id="65452" label="LIMS2 (co) SLCO2A1" source="7938" target="5938" cy:directed="1"/>
      <edge id="65451" label="LIMS2 (co) CCM2L" source="7938" target="7842" cy:directed="1"/>
      <edge id="65450" label="LIMS2 (co) SLC44A2" source="7938" target="3703" cy:directed="1"/>
      <edge id="65449" label="LIMS2 (co) NCAPG" source="7938" target="7759" cy:directed="1"/>
      <edge id="65448" label="LIMS2 (co) MOB2" source="7938" target="3807" cy:directed="1"/>
      <edge id="65447" label="LIMS2 (co) NEK2" source="7938" target="7663" cy:directed="1"/>
      <edge id="65446" label="LIMS2 (co) ZNF358" source="7938" target="2675" cy:directed="1"/>
      <edge id="65445" label="LIMS2 (co) INPP5K" source="7938" target="4279" cy:directed="1"/>
      <edge id="65444" label="LIMS2 (co) ZNF717" source="7938" target="2473" cy:directed="1"/>
      <edge id="65443" label="LIMS2 (co) TMEM44" source="7938" target="2398" cy:directed="1"/>
      <edge id="65442" label="LIMS2 (co) TBX3" source="7938" target="3652" cy:directed="1"/>
      <edge id="65441" label="LIMS2 (co) MYBL2" source="7938" target="7781" cy:directed="1"/>
      <edge id="65440" label="LIMS2 (co) SORBS3" source="7938" target="6682" cy:directed="1"/>
      <edge id="65439" label="LIMS2 (co) UBE2C" source="7938" target="7901" cy:directed="1"/>
      <edge id="65438" label="LIMS2 (co) PRX" source="7938" target="7777" cy:directed="1"/>
      <edge id="65437" label="LIMS2 (co) KIAA1614" source="7938" target="2353" cy:directed="1"/>
      <edge id="65436" label="LIMS2 (co) SHE" source="7938" target="7773" cy:directed="1"/>
      <edge id="65435" label="LIMS2 (co) TMEM109" source="7938" target="2880" cy:directed="1"/>
      <edge id="65434" label="LIMS2 (co) KANK3" source="7938" target="7805" cy:directed="1"/>
      <edge id="65433" label="LIMS2 (co) RRAS" source="7938" target="7531" cy:directed="1"/>
      <edge id="65432" label="LIMS2 (co) SMAD7" source="7938" target="1267" cy:directed="1"/>
      <edge id="65431" label="LIMS2 (co) ASPM" source="7938" target="7848" cy:directed="1"/>
      <edge id="65430" label="LIMS2 (co) DNAJB2" source="7938" target="897" cy:directed="1"/>
      <edge id="65429" label="LIMS2 (co) PLXNB3" source="7938" target="1842" cy:directed="1"/>
      <edge id="65428" label="LIMS2 (co) LYSMD4" source="7938" target="784" cy:directed="1"/>
      <edge id="65427" label="LIMS2 (co) PTTG1" source="7938" target="7768" cy:directed="1"/>
      <edge id="65426" label="LIMS2 (co) RAMP2" source="7938" target="7492" cy:directed="1"/>
      <edge id="65425" label="LIMS2 (co) TMEM70" source="7938" target="2814" cy:directed="1"/>
      <edge id="65424" label="LIMS2 (co) GATA2" source="7938" target="3362" cy:directed="1"/>
      <edge id="65423" label="LIMS2 (co) HPCAL1" source="7938" target="7125" cy:directed="1"/>
      <edge id="65422" label="LIMS2 (co) BUB1" source="7938" target="7521" cy:directed="1"/>
      <edge id="65421" label="LIMS2 (co) ATOH8" source="7938" target="7575" cy:directed="1"/>
      <edge id="65420" label="LIMS2 (co) C22orf39" source="7938" target="5434" cy:directed="1"/>
      <edge id="65419" label="LIMS2 (co) TEK" source="7938" target="7666" cy:directed="1"/>
      <edge id="65418" label="LIMS2 (co) KIF17" source="7938" target="4034" cy:directed="1"/>
      <edge id="65417" label="DNAH2 (co) FAM166B" source="7937" target="7936" cy:directed="1"/>
      <edge id="65416" label="DNAH2 (co) WDR96" source="7937" target="7908" cy:directed="1"/>
      <edge id="65415" label="DNAH2 (co) ROPN1L" source="7937" target="7836" cy:directed="1"/>
      <edge id="65414" label="DNAH2 (co) EFCAB1" source="7937" target="7688" cy:directed="1"/>
      <edge id="65413" label="DNAH2 (co) EFCAB12" source="7937" target="7643" cy:directed="1"/>
      <edge id="65412" label="FAM166B (co) RHOV" source="7936" target="6960" cy:directed="1"/>
      <edge id="65411" label="FAM166B (co) NGEF" source="7936" target="3911" cy:directed="1"/>
      <edge id="65410" label="FAM166B (co) EPN3" source="7936" target="2782" cy:directed="1"/>
      <edge id="65409" label="FEZ1 (co) AOC3" source="7935" target="7934" cy:directed="1"/>
      <edge id="65408" label="FEZ1 (co) ARHGAP6" source="7935" target="7851" cy:directed="1"/>
      <edge id="65407" label="FEZ1 (co) PLAC9" source="7935" target="7782" cy:directed="1"/>
      <edge id="65406" label="FEZ1 (co) SNX25" source="7935" target="7949" cy:directed="1"/>
      <edge id="65405" label="FEZ1 (co) DENND2A" source="7935" target="6444" cy:directed="1"/>
      <edge id="65404" label="FEZ1 (co) VSIG4" source="7935" target="7868" cy:directed="1"/>
      <edge id="65403" label="FEZ1 (co) PLAC9" source="7935" target="7782" cy:directed="1"/>
      <edge id="65402" label="FEZ1 (co) GNG11" source="7935" target="7429" cy:directed="1"/>
      <edge id="65401" label="FEZ1 (co) CDC20" source="7935" target="7801" cy:directed="1"/>
      <edge id="65400" label="FEZ1 (co) AURKA" source="7935" target="6605" cy:directed="1"/>
      <edge id="65399" label="FEZ1 (co) MYBL2" source="7935" target="7781" cy:directed="1"/>
      <edge id="65398" label="FEZ1 (co) FAM105A" source="7935" target="7806" cy:directed="1"/>
      <edge id="65397" label="FEZ1 (co) COX4I2" source="7935" target="6930" cy:directed="1"/>
      <edge id="65396" label="FEZ1 (co) LRP2BP" source="7935" target="4162" cy:directed="1"/>
      <edge id="65395" label="FEZ1 (co) UBE2C" source="7935" target="7901" cy:directed="1"/>
      <edge id="65394" label="UGT2A2 (co) IL25" source="7933" target="7932" cy:directed="1"/>
      <edge id="65393" label="DUOXA1 (co) PIP5K1B" source="7931" target="7950" cy:directed="1"/>
      <edge id="65392" label="DUOXA1 (co) CPM" source="7931" target="7589" cy:directed="1"/>
      <edge id="65391" label="DUOXA1 (co) UCK2" source="7931" target="7275" cy:directed="1"/>
      <edge id="65390" label="DUOXA1 (co) ARMC9" source="7931" target="7207" cy:directed="1"/>
      <edge id="65389" label="DUOXA1 (co) GIMAP4" source="7931" target="6914" cy:directed="1"/>
      <edge id="65388" label="DUOXA1 (co) PIP5K1B" source="7931" target="7950" cy:directed="1"/>
      <edge id="65387" label="DUOXA1 (co) ALDH3B1" source="7931" target="7791" cy:directed="1"/>
      <edge id="65386" label="DUOXA1 (co) ABCA3" source="7931" target="7843" cy:directed="1"/>
      <edge id="65385" label="DUOXA1 (co) LRRK2" source="7931" target="7965" cy:directed="1"/>
      <edge id="65384" label="DUOXA1 (co) ESRP1" source="7931" target="5780" cy:directed="1"/>
      <edge id="65383" label="DUOXA1 (co) SNX25" source="7931" target="7949" cy:directed="1"/>
      <edge id="65382" label="DUOXA1 (co) GRHL2" source="7931" target="5054" cy:directed="1"/>
      <edge id="65381" label="DUOXA1 (co) MARVELD3" source="7931" target="5507" cy:directed="1"/>
      <edge id="65380" label="DUOXA1 (co) CNRIP1" source="7931" target="7319" cy:directed="1"/>
      <edge id="65379" label="DUOXA1 (co) ZEB2" source="7931" target="6953" cy:directed="1"/>
      <edge id="65378" label="DUOXA1 (co) ARHGEF16" source="7931" target="7443" cy:directed="1"/>
      <edge id="65377" label="DUOXA1 (co) FAM162B" source="7931" target="5241" cy:directed="1"/>
      <edge id="65376" label="DUOXA1 (co) MFSD2A" source="7931" target="7705" cy:directed="1"/>
      <edge id="65375" label="DUOXA1 (co) LMO3" source="7931" target="7657" cy:directed="1"/>
      <edge id="65374" label="DUOXA1 (co) C2" source="7931" target="7966" cy:directed="1"/>
[truncated: 5,417,839 more chars]
