# Supplementary material
Source: publisher figshare collection journal article supplement (https://springernature.figshare.com/ndownloader/files/35041376)
Supplement: Supplementary file 1 [file 35041376 › CytoscapeSession-2021_06_28-02_05/networks/66396-lung_GRN4GTEx_normal.txt.xgmml]

<?xml version="1.0" encoding="UTF-8" standalone="yes"?>
<graph id="66396" label="lung_GRN4GTEx_normal.txt" cy:view="0" cy:registered="0" cy:documentVersion="3.0" xmlns:dc="http://purl.org/dc/elements/1.1/" xmlns:xlink="http://www.w3.org/1999/xlink" xmlns:rdf="http://www.w3.org/1999/02/22-rdf-syntax-ns#" xmlns:cy="http://www.cytoscape.org" xmlns="http://www.cs.rpi.edu/XGMML">
  <att>
    <graph id="66412" label="66412" cy:registered="0">
    </graph>
  </att>
  <att>
    <graph id="66422" label="lung_GRN4GTEx_normal.txt" cy:registered="1">
      <node id="67988" label="SLIT2"/>
      <node id="67987" label="KIAA0408"/>
      <node id="67986" label="LPAR3"/>
      <node id="67985" label="TJP3"/>
      <node id="67984" label="HEATR2"/>
      <node id="67983" label="SORD"/>
      <node id="67982" label="CYP2J2"/>
      <node id="67981" label="HSPB11"/>
      <node id="67980" label="SYT8"/>
      <node id="67979" label="CCDC176"/>
      <node id="67978" label="GLB1L2"/>
      <node id="67977" label="DYNC2H1"/>
      <node id="67976" label="VSTM2L"/>
      <node id="67975" label="CDS1"/>
      <node id="67974" label="NEK10"/>
      <node id="67973" label="RTDR1"/>
      <node id="67972" label="TMEM232"/>
      <node id="67971" label="IQCC"/>
      <node id="67970" label="CCDC74B"/>
      <node id="67969" label="SLC27A2"/>
      <node id="67968" label="EFCAB11"/>
      <node id="67967" label="UBXN10"/>
      <node id="67966" label="OSCP1"/>
      <node id="67965" label="AK7"/>
      <node id="67964" label="ZMYND12"/>
      <node id="67963" label="ACSBG1"/>
      <node id="67962" label="KIF9"/>
      <node id="67961" label="DTHD1"/>
      <node id="67960" label="C16orf71"/>
      <node id="67959" label="IQUB"/>
      <node id="67958" label="ZDHHC13"/>
      <node id="67957" label="PACRG"/>
      <node id="67956" label="CDH26"/>
      <node id="67955" label="C20orf26"/>
      <node id="67954" label="CCDC113"/>
      <node id="67953" label="RPGRIP1L"/>
      <node id="67952" label="TTC18"/>
      <node id="67951" label="PRR15"/>
      <node id="67950" label="ZNF474"/>
      <node id="67949" label="ENKUR"/>
      <node id="67948" label="ZNF273"/>
      <node id="67947" label="C9orf9"/>
      <node id="67946" label="CCDC153"/>
      <node id="67945" label="TTC23L"/>
      <node id="67944" label="MAT1A"/>
      <node id="67943" label="EFCAB10"/>
      <node id="67942" label="ARX"/>
      <node id="67941" label="C16orf93"/>
      <node id="67940" label="CCDC170"/>
      <node id="67939" label="TMEM231"/>
      <node id="67938" label="C9orf116"/>
      <node id="67937" label="RSPH9"/>
      <node id="67936" label="CD164L2"/>
      <node id="67935" label="NEK5"/>
      <node id="67934" label="CCDC65"/>
      <node id="67933" label="ESPN"/>
      <node id="67932" label="DRC1"/>
      <node id="67931" label="MOK"/>
      <node id="67930" label="KIF24"/>
      <node id="67929" label="C8orf47"/>
      <node id="67928" label="C9orf24"/>
      <node id="67927" label="EFCAB12"/>
      <node id="67926" label="SPATA18"/>
      <node id="67925" label="EIF2B3"/>
      <node id="67924" label="ZMYND8"/>
      <node id="67923" label="CBX8"/>
      <node id="67922" label="TYMP"/>
      <node id="67921" label="GLI4"/>
      <node id="67920" label="PSMB10"/>
      <node id="67919" label="ZNF575"/>
      <node id="67918" label="MPST"/>
      <node id="67917" label="TSNARE1"/>
      <node id="67916" label="CARD9"/>
      <node id="67915" label="SIGMAR1"/>
      <node id="67914" label="CORO1B"/>
      <node id="67913" label="IKBKE"/>
      <node id="67912" label="C3orf18"/>
      <node id="67911" label="LYPLA2"/>
      <node id="67910" label="XYLT2"/>
      <node id="67909" label="ANKRD54"/>
      <node id="67908" label="RABL2B"/>
      <node id="67907" label="UBE2L3"/>
      <node id="67906" label="SDSL"/>
      <node id="67905" label="EIF4EBP1"/>
      <node id="67904" label="MRPS18B"/>
      <node id="67903" label="LSM4"/>
      <node id="67902" label="CTDSP1"/>
      <node id="67901" label="C1orf123"/>
      <node id="67900" label="OST4"/>
      <node id="67899" label="LRRC14"/>
      <node id="67898" label="PHPT1"/>
      <node id="67897" label="CCS"/>
      <node id="67896" label="ATP6V0D1"/>
      <node id="67895" label="TOMM22"/>
      <node id="67894" label="FAM175B"/>
      <node id="67893" label="PDSS2"/>
      <node id="67892" label="FKBPL"/>
      <node id="67891" label="MCM3"/>
      <node id="67890" label="NCBP2"/>
      <node id="67889" label="MTX1"/>
      <node id="67888" label="PSMB5"/>
      <node id="67887" label="C11orf70"/>
      <node id="67886" label="ATIC"/>
      <node id="67885" label="PLA2G10"/>
      <node id="67884" label="KNOP1"/>
      <node id="67883" label="TMEM254"/>
      <node id="67882" label="TMCO4"/>
      <node id="67881" label="BCCIP"/>
      <node id="67880" label="GYG2"/>
      <node id="67879" label="PIP4K2C"/>
      <node id="67878" label="IFT57"/>
      <node id="67877" label="ACAD8"/>
      <node id="67876" label="PPIL1"/>
      <node id="67875" label="CYBA"/>
      <node id="67874" label="CDK7"/>
      <node id="67873" label="NDUFAB1"/>
      <node id="67872" label="RAD1"/>
      <node id="67871" label="TXNDC5"/>
      <node id="67870" label="POU2F3"/>
      <node id="67869" label="FASTKD5"/>
      <node id="67868" label="LRP2BP"/>
      <node id="67867" label="SLC7A8"/>
      <node id="67866" label="ZDHHC3"/>
      <node id="67865" label="TMEM97"/>
      <node id="67864" label="ZC2HC1C"/>
      <node id="67863" label="LDHD"/>
      <node id="67862" label="CXCL17"/>
      <node id="67861" label="EBNA1BP2"/>
      <node id="67860" label="CCDC101"/>
      <node id="67859" label="C12orf49"/>
      <node id="67858" label="BEND3"/>
      <node id="67857" label="PRODH"/>
      <node id="67856" label="SGPP2"/>
      <node id="67855" label="GOLT1A"/>
      <node id="67854" label="C19orf54"/>
      <node id="67853" label="KCNQ1"/>
      <node id="67852" label="ID3"/>
      <node id="67851" label="HPCAL1"/>
      <node id="67850" label="TMEM258"/>
      <node id="67849" label="SOX9"/>
      <node id="67848" label="ACVRL1"/>
      <node id="67847" label="DOK4"/>
      <node id="67846" label="VWA1"/>
      <node id="67845" label="FOXA1"/>
      <node id="67844" label="LEPREL4"/>
      <node id="67843" label="SLC27A3"/>
      <node id="67842" label="ZNF408"/>
      <node id="67841" label="SNX1"/>
      <node id="67840" label="PQLC2"/>
      <node id="67839" label="SNRPB2"/>
      <node id="67838" label="GGT1"/>
      <node id="67837" label="NINJ2"/>
      <node id="67836" label="PIGM"/>
      <node id="67835" label="ARAP1"/>
      <node id="67834" label="IARS2"/>
      <node id="67833" label="ATP11A"/>
      <node id="67832" label="TRMT5"/>
      <node id="67831" label="ARHGEF15"/>
      <node id="67830" label="RP11-664D7.4"/>
      <node id="67829" label="SIGLEC7"/>
      <node id="67828" label="PIH1D1"/>
      <node id="67827" label="YDJC"/>
      <node id="67826" label="ARV1"/>
      <node id="67825" label="RTKN"/>
      <node id="67824" label="SYNE4"/>
      <node id="67823" label="RPN1"/>
      <node id="67822" label="LPCAT1"/>
      <node id="67821" label="MRPL47"/>
      <node id="67820" label="SPTSSA"/>
      <node id="67819" label="SEZ6L2"/>
      <node id="67818" label="ENTPD3"/>
      <node id="67817" label="TOX"/>
      <node id="67816" label="DHCR24"/>
      <node id="67815" label="PSMB7"/>
      <node id="67814" label="ST6GALNAC4"/>
      <node id="67813" label="CDK4"/>
      <node id="67812" label="PCGF1"/>
      <node id="67811" label="PWWP2A"/>
      <node id="67810" label="LGALSL"/>
      <node id="67809" label="DSN1"/>
      <node id="67808" label="CDK2AP2"/>
      <node id="67807" label="GLE1"/>
      <node id="67806" label="TMEM186"/>
      <node id="67805" label="SLC9A3R2"/>
      <node id="67804" label="KCTD5"/>
      <node id="67803" label="PDZD11"/>
      <node id="67802" label="CSTF1"/>
      <node id="67801" label="PMVK"/>
      <node id="67800" label="BLVRB"/>
      <node id="67799" label="COG8"/>
      <node id="67798" label="NDUFV3"/>
      <node id="67797" label="PNPO"/>
      <node id="67796" label="ITPK1"/>
      <node id="67795" label="DHFR"/>
      <node id="67794" label="RMDN2"/>
      <node id="67793" label="POP7"/>
      <node id="67792" label="RAB10"/>
      <node id="67791" label="C10orf128"/>
      <node id="67790" label="DNAJB12"/>
      <node id="67789" label="COL5A1"/>
      <node id="67788" label="HS1BP3"/>
      <node id="67787" label="C14orf119"/>
      <node id="67786" label="MOB3A"/>
      <node id="67785" label="USP40"/>
      <node id="67784" label="LYPLAL1"/>
      <node id="67783" label="MFSD1"/>
      <node id="67782" label="ZNF135"/>
      <node id="67781" label="SIAE"/>
      <node id="67780" label="EMC7"/>
      <node id="67779" label="GSKIP"/>
      <node id="67778" label="VPS4B"/>
      <node id="67777" label="UBLCP1"/>
      <node id="67776" label="GLS2"/>
      <node id="67775" label="MRPS22"/>
      <node id="67774" label="PRR15L"/>
      <node id="67773" label="CHCHD4"/>
      <node id="67772" label="CACNB1"/>
      <node id="67771" label="SMIM1"/>
      <node id="67770" label="ASPSCR1"/>
      <node id="67769" label="ELAC1"/>
      <node id="67768" label="UBE2D4"/>
      <node id="67767" label="RTCA"/>
      <node id="67766" label="ZXDC"/>
      <node id="67765" label="NUBP2"/>
      <node id="67764" label="PALMD"/>
      <node id="67763" label="ABT1"/>
      <node id="67762" label="FDPS"/>
      <node id="67761" label="VWA9"/>
      <node id="67760" label="PANK1"/>
      <node id="67759" label="DSC2"/>
      <node id="67758" label="NDUFB2"/>
      <node id="67757" label="C12orf4"/>
      <node id="67756" label="ATP6V1C1"/>
      <node id="67755" label="C15orf52"/>
      <node id="67754" label="YARS2"/>
      <node id="67753" label="C6orf223"/>
      <node id="67752" label="MRPL54"/>
      <node id="67751" label="IRF2BP1"/>
      <node id="67750" label="XRCC2"/>
      <node id="67749" label="TENC1"/>
      <node id="67748" label="NCMAP"/>
      <node id="67747" label="ARSE"/>
      <node id="67746" label="NOC2L"/>
      <node id="67745" label="CDC25C"/>
      <node id="67744" label="DSCR3"/>
      <node id="67743" label="TRAM1"/>
      <node id="67742" label="ZNF385B"/>
      <node id="67741" label="CD14"/>
      <node id="67740" label="URB2"/>
      <node id="67739" label="MCAT"/>
      <node id="67738" label="DNASE1L1"/>
      <node id="67737" label="DNASE1"/>
      <node id="67736" label="LRRC61"/>
      <node id="67735" label="VTA1"/>
      <node id="67734" label="TTC1"/>
      <node id="67733" label="ASB8"/>
      <node id="67732" label="PSMD9"/>
      <node id="67731" label="NAIF1"/>
      <node id="67730" label="L3MBTL2"/>
      <node id="67729" label="WIBG"/>
      <node id="67728" label="GOPC"/>
      <node id="67727" label="MED19"/>
      <node id="67726" label="SF3B4"/>
      <node id="67725" label="SEC24C"/>
      <node id="67724" label="ZBED6CL"/>
      <node id="67723" label="ABCF2"/>
      <node id="67722" label="SUV39H1"/>
      <node id="67721" label="WDR3"/>
      <node id="67720" label="COQ3"/>
      <node id="67719" label="SH3BP5L"/>
      <node id="67718" label="ASB6"/>
      <node id="67717" label="IPP"/>
      <node id="67716" label="TMEM182"/>
      <node id="67715" label="NUP35"/>
      <node id="67714" label="ADH5"/>
      <node id="67713" label="TIMM50"/>
      <node id="67712" label="DCTD"/>
      <node id="67711" label="SLC4A1AP"/>
      <node id="67710" label="SLC25A17"/>
      <node id="67709" label="RNF26"/>
      <node id="67708" label="ALKBH4"/>
      <node id="67707" label="ORC5"/>
      <node id="67706" label="C9orf64"/>
      <node id="67705" label="TMEM245"/>
      <node id="67704" label="ZNF2"/>
      <node id="67703" label="C10orf35"/>
      <node id="67702" label="FBXO45"/>
      <node id="67701" label="EAF2"/>
      <node id="67700" label="ADI1"/>
      <node id="67699" label="DHTKD1"/>
      <node id="67698" label="ICMT"/>
      <node id="67697" label="RBBP5"/>
      <node id="67696" label="C2orf47"/>
      <node id="67695" label="RBFA"/>
      <node id="67694" label="PCYT2"/>
      <node id="67693" label="DPH2"/>
      <node id="67692" label="COMMD5"/>
      <node id="67691" label="SRPRB"/>
      <node id="67690" label="COA4"/>
      <node id="67689" label="CRELD2"/>
      <node id="67688" label="TXNDC9"/>
      <node id="67687" label="SEC61A1"/>
      <node id="67686" label="GTF2E1"/>
      <node id="67685" label="ARRB1"/>
      <node id="67684" label="MRPS7"/>
      <node id="67683" label="PSKH1"/>
      <node id="67682" label="AP5Z1"/>
      <node id="67681" label="C6orf203"/>
      <node id="67680" label="C1GALT1C1"/>
      <node id="67679" label="LSM1"/>
      <node id="67678" label="RFC5"/>
      <node id="67677" label="RPIA"/>
      <node id="67676" label="SRRD"/>
      <node id="67675" label="PPP1R8"/>
      <node id="67674" label="ZNF646"/>
      <node id="67673" label="GPN1"/>
      <node id="67672" label="SRCRB4D"/>
      <node id="67671" label="TEFM"/>
      <node id="67670" label="MRPL40"/>
      <node id="67669" label="FBXL18"/>
      <node id="67668" label="TALDO1"/>
      <node id="67667" label="PPL"/>
      <node id="67666" label="NUFIP1"/>
      <node id="67665" label="ZNF576"/>
      <node id="67664" label="ASCC2"/>
      <node id="67663" label="DSCC1"/>
      <node id="67662" label="H2AFY"/>
      <node id="67661" label="ZSCAN20"/>
      <node id="67660" label="NDUFS3"/>
      <node id="67659" label="KBTBD6"/>
      <node id="67658" label="C18orf21"/>
      <node id="67657" label="POP1"/>
      <node id="67656" label="PIGW"/>
      <node id="67655" label="TRMT12"/>
      <node id="67654" label="TRMT61B"/>
      <node id="67653" label="PAXIP1"/>
      <node id="67652" label="RNMTL1"/>
      <node id="67651" label="RPP38"/>
      <node id="67650" label="ZNF517"/>
      <node id="67649" label="RPS19BP1"/>
      <node id="67648" label="MRTO4"/>
      <node id="67647" label="TYK2"/>
      <node id="67646" label="MFNG"/>
      <node id="67645" label="MESP1"/>
      <node id="67644" label="RTN4IP1"/>
      <node id="67643" label="ZNF622"/>
      <node id="67642" label="PATZ1"/>
      <node id="67641" label="NDUFB3"/>
      <node id="67640" label="DNTTIP1"/>
      <node id="67639" label="ZBTB45"/>
      <node id="67638" label="ZBTB8OS"/>
      <node id="67637" label="RPUSD2"/>
      <node id="67636" label="ZSWIM3"/>
      <node id="67635" label="CR1"/>
      <node id="67634" label="GDPGP1"/>
      <node id="67633" label="PAK1IP1"/>
      <node id="67632" label="GSR"/>
      <node id="67631" label="MARS2"/>
      <node id="67630" label="VAC14"/>
      <node id="67629" label="TRMT10C"/>
      <node id="67628" label="MTERFD1"/>
      <node id="67627" label="HPS6"/>
      <node id="67626" label="ZNF786"/>
      <node id="67625" label="NIP7"/>
      <node id="67624" label="DBT"/>
      <node id="67623" label="TRIAP1"/>
      <node id="67622" label="MRPS18A"/>
      <node id="67621" label="MSRB1"/>
      <node id="67620" label="ARHGAP35"/>
      <node id="67619" label="RHBDD3"/>
      <node id="67618" label="CHAC2"/>
      <node id="67617" label="SPSB2"/>
      <node id="67616" label="HENMT1"/>
      <node id="67615" label="ACN9"/>
      <node id="67614" label="DNAJC28"/>
      <node id="67613" label="ZNF212"/>
      <node id="67612" label="POLR3C"/>
      <node id="67611" label="SNTB1"/>
      <node id="67610" label="AL591479.1"/>
      <node id="67609" label="WDR6"/>
      <node id="67608" label="PSMD4"/>
      <node id="67607" label="TLR4"/>
      <node id="67606" label="STRIP1"/>
      <node id="67605" label="FAM78A"/>
      <node id="67604" label="SMPDL3B"/>
      <node id="67603" label="KBTBD7"/>
      <node id="67602" label="SPDYE3"/>
      <node id="67601" label="BRD8"/>
      <node id="67600" label="PPT1"/>
      <node id="67599" label="LRRC8E"/>
      <node id="67598" label="FAM217B"/>
      <node id="67597" label="MOCS3"/>
      <node id="67596" label="RPUSD4"/>
      <node id="67595" label="MVP"/>
      <node id="67594" label="USP18"/>
      <node id="67593" label="KIAA0196"/>
      <node id="67592" label="SLCO2B1"/>
      <node id="67591" label="TSN"/>
      <node id="67590" label="EMC1"/>
      <node id="67589" label="NKX2-1"/>
      <node id="67588" label="ZMAT5"/>
      <node id="67587" label="PRIM1"/>
      <node id="67586" label="RDH13"/>
      <node id="67585" label="RPL7L1"/>
      <node id="67584" label="CCDC97"/>
      <node id="67583" label="DBNL"/>
      <node id="67582" label="PLGRKT"/>
      <node id="67581" label="NAGK"/>
      <node id="67580" label="REXO4"/>
      <node id="67579" label="UBTF"/>
      <node id="67578" label="MRPS9"/>
      <node id="67577" label="PRKAG1"/>
      <node id="67576" label="HADH"/>
      <node id="67575" label="CHAMP1"/>
      <node id="67574" label="HSDL1"/>
      <node id="67573" label="SUGP1"/>
      <node id="67572" label="ACAD9"/>
      <node id="67571" label="MRPL20"/>
      <node id="67570" label="HPS1"/>
      <node id="67569" label="DBR1"/>
      <node id="67568" label="CHRNB1"/>
      <node id="67567" label="KIAA1279"/>
      <node id="67566" label="CYB561D1"/>
      <node id="67565" label="SEMA4F"/>
      <node id="67564" label="SHARPIN"/>
      <node id="67563" label="CLP1"/>
      <node id="67562" label="NPRL3"/>
      <node id="67561" label="TM6SF1"/>
      <node id="67560" label="NEURL4"/>
      <node id="67559" label="AASDH"/>
      <node id="67558" label="SIRT2"/>
      <node id="67557" label="TADA3"/>
      <node id="67556" label="LRRC47"/>
      <node id="67555" label="BCS1L"/>
      <node id="67554" label="POLR1C"/>
      <node id="67553" label="MNDA"/>
      <node id="67552" label="SHE"/>
      <node id="67551" label="TXLNA"/>
      <node id="67550" label="ASNA1"/>
      <node id="67549" label="CCDC43"/>
      <node id="67548" label="SNRNP40"/>
      <node id="67547" label="ALDH16A1"/>
      <node id="67546" label="ATP6V1D"/>
      <node id="67545" label="TMEM39B"/>
      <node id="67544" label="SAYSD1"/>
      <node id="67543" label="LSM14B"/>
      <node id="67542" label="GTF2H3"/>
      <node id="67541" label="ZNF319"/>
      <node id="67540" label="HDHD2"/>
      <node id="67539" label="PTPLAD1"/>
      <node id="67538" label="ERP29"/>
      <node id="67537" label="DEPTOR"/>
      <node id="67536" label="PEX3"/>
      <node id="67535" label="LZTR1"/>
      <node id="67534" label="ELP3"/>
      <node id="67533" label="ATP5A1"/>
      <node id="67532" label="SHKBP1"/>
      <node id="67531" label="PUF60"/>
      <node id="67530" label="THOP1"/>
      <node id="67529" label="TIMM21"/>
      <node id="67528" label="FBXW5"/>
      <node id="67527" label="C3orf33"/>
      <node id="67526" label="DFFB"/>
      <node id="67525" label="GLTPD1"/>
      <node id="67524" label="LCMT2"/>
      <node id="67523" label="XKR8"/>
      <node id="67522" label="PSMG1"/>
      <node id="67521" label="ECH1"/>
      <node id="67520" label="SLC36A1"/>
      <node id="67519" label="FZD8"/>
      <node id="67518" label="TMEM192"/>
      <node id="67517" label="PUS1"/>
      <node id="67516" label="CA12"/>
      <node id="67515" label="PIP4K2B"/>
      <node id="67514" label="EXOSC2"/>
      <node id="67513" label="FBXO27"/>
      <node id="67512" label="HN1L"/>
      <node id="67511" label="SIGLEC10"/>
      <node id="67510" label="EIF3B"/>
      <node id="67509" label="ADCK5"/>
      <node id="67508" label="ZNF341"/>
      <node id="67507" label="NOP56"/>
      <node id="67506" label="SMG8"/>
      <node id="67505" label="HDDC3"/>
      <node id="67504" label="KDM4A"/>
      <node id="67503" label="PSMD2"/>
      <node id="67502" label="ZSCAN25"/>
      <node id="67501" label="E2F4"/>
      <node id="67500" label="PSME3"/>
      <node id="67499" label="TGFBRAP1"/>
      <node id="67498" label="HIF1AN"/>
      <node id="67497" label="DNAJA3"/>
      <node id="67496" label="SMAD6"/>
      <node id="67495" label="PARN"/>
      <node id="67494" label="CBS"/>
      <node id="67493" label="MRPL46"/>
      <node id="67492" label="SLC12A9"/>
      <node id="67491" label="ARPC4"/>
      <node id="67490" label="ARMC9"/>
      <node id="67489" label="ARCN1"/>
      <node id="67488" label="QDPR"/>
      <node id="67487" label="TMEM9B"/>
      <node id="67486" label="KARS"/>
      <node id="67485" label="ZSWIM5"/>
      <node id="67484" label="ABCC10"/>
      <node id="67483" label="PABPC1L"/>
      <node id="67482" label="CDKL2"/>
      <node id="67481" label="C1orf116"/>
      <node id="67480" label="AKAP1"/>
      <node id="67479" label="PRSS16"/>
      <node id="67478" label="PARM1"/>
      <node id="67477" label="CRTAC1"/>
      <node id="67476" label="GINS1"/>
      <node id="67475" label="CENPA"/>
      <node id="67474" label="ZNF219"/>
      <node id="67473" label="ZFHX3"/>
      <node id="67472" label="POU4F2"/>
      <node id="67471" label="POU3F3"/>
      <node id="67470" label="MSX2"/>
      <node id="67469" label="LIN54"/>
      <node id="67468" label="LHX1"/>
      <node id="67467" label="FOXB1"/>
      <node id="67466" label="BCL6"/>
      <node id="67465" label="BARX1"/>
      <node id="67464" label="CAMK2N1"/>
      <node id="67463" label="MSX1"/>
      <node id="67462" label="TBX20"/>
      <node id="67461" label="KMT2A"/>
      <node id="67460" label="GMEB1"/>
      <node id="67459" label="FOXK1"/>
      <node id="67458" label="ATOH8"/>
      <node id="67457" label="JUN"/>
      <node id="67456" label="TLX2"/>
      <node id="67455" label="SMAD3"/>
      <node id="67454" label="SCRT1"/>
      <node id="67453" label="THRA"/>
      <node id="67452" label="ATF6"/>
      <node id="67451" label="MGA"/>
      <node id="67450" label="RFX1"/>
      <node id="67449" label="GCM1"/>
      <node id="67448" label="MEF2D"/>
      <node id="67447" label="NR3C2"/>
      <node id="67446" label="ETS1"/>
      <node id="67445" label="YBX1"/>
      <node id="67444" label="TFDP1"/>
      <node id="67443" label="E2F1"/>
      <node id="67442" label="CENPB"/>
      <node id="67441" label="TCFL5"/>
      <node id="67440" label="STAT1"/>
      <node id="67439" label="GMEB2"/>
      <node id="67438" label="HEY1"/>
      <node id="67437" label="FLI1"/>
      <node id="67436" label="TP63"/>
      <node id="67435" label="HSFY2"/>
      <node id="67434" label="EVX2"/>
      <node id="67433" label="YY1"/>
      <node id="67432" label="E2F5"/>
      <node id="67431" label="TFE3"/>
      <node id="67430" label="NFYB"/>
      <node id="67429" label="NFYC"/>
      <node id="67428" label="GBX1"/>
      <node id="67427" label="TBX4"/>
      <node id="67426" label="DBP"/>
      <node id="67425" label="TFEC"/>
      <node id="67424" label="SP4"/>
      <node id="67423" label="HEYL"/>
      <node id="67422" label="RFX5"/>
      <node id="67421" label="RFX3"/>
      <node id="67420" label="ARID2"/>
      <node id="67419" label="HSF1"/>
      <node id="67418" label="ELK3"/>
      <node id="67417" label="MIPEP"/>
      <node id="67416" label="RFX4"/>
      <node id="67415" label="TTC30B"/>
      <node id="67414" label="ST6GALNAC1"/>
      <node id="67413" label="SLC44A4"/>
      <node id="67412" label="RUVBL2"/>
      <node id="67411" label="CCDC24"/>
      <node id="67410" label="SPA17"/>
      <node id="67409" label="IGSF9"/>
      <node id="67408" label="SPTBN2"/>
      <node id="67407" label="FBXW9"/>
      <node id="67406" label="SIX4"/>
      <node id="67405" label="C10orf95"/>
      <node id="67404" label="RFX2"/>
      <node id="67403" label="CP"/>
      <node id="67402" label="DZIP1L"/>
      <node id="67401" label="EPN3"/>
      <node id="67400" label="FAM227A"/>
      <node id="67399" label="CCDC13"/>
      <node id="67398" label="SLC52A1"/>
      <node id="67397" label="E2F8"/>
      <node id="67396" label="NGEF"/>
      <node id="67395" label="RABL5"/>
      <node id="67394" label="SRCIN1"/>
      <node id="67393" label="PVRL4"/>
      <node id="67392" label="CCDC74A"/>
      <node id="67391" label="IFT46"/>
      <node id="67390" label="OTX1"/>
      <node id="67389" label="TCTEX1D1"/>
      <node id="67388" label="TIGD4"/>
      <node id="67387" label="C17orf72"/>
      <node id="67386" label="DNAAF1"/>
      <node id="67385" label="DENND6B"/>
      <node id="67384" label="TSNAXIP1"/>
      <node id="67383" label="IRF6"/>
      <node id="67382" label="PAX9"/>
      <node id="67381" label="PPP1R32"/>
      <node id="67380" label="RAB36"/>
      <node id="67379" label="RIBC1"/>
      <node id="67378" label="ADGB"/>
      <node id="67377" label="WDR16"/>
      <node id="67376" label="CCDC151"/>
      <node id="67375" label="FAM154B"/>
      <node id="67374" label="SIX1"/>
      <node id="67373" label="CCDC114"/>
      <node id="67372" label="FHAD1"/>
      <node id="67371" label="WDR96"/>
      <node id="67370" label="MDH1B"/>
      <node id="67369" label="RHOV"/>
      <node id="67368" label="PPAP2C"/>
      <node id="67367" label="WDR54"/>
      <node id="67366" label="NPHP1"/>
      <node id="67365" label="GRIN3B"/>
      <node id="67364" label="C9orf117"/>
      <node id="67363" label="DNAH10"/>
      <node id="67362" label="FAM166B"/>
      <node id="67361" label="FANK1"/>
      <node id="67360" label="C4orf47"/>
      <node id="67359" label="ARHGAP39"/>
      <node id="67358" label="PPIL6"/>
      <node id="67357" label="C3orf67"/>
      <node id="67356" label="SPAG8"/>
      <node id="67355" label="KLHL32"/>
      <node id="67354" label="CCDC180"/>
      <node id="67353" label="C22orf15"/>
      <node id="67352" label="CETN2"/>
      <node id="67351" label="MAK"/>
      <node id="67350" label="CDHR3"/>
      <node id="67349" label="ROPN1L"/>
      <node id="67348" label="TSPAN1"/>
      <node id="67347" label="CCNO"/>
      <node id="67346" label="LRRC23"/>
      <node id="67345" label="SPEF1"/>
      <node id="67344" label="ZMYND10"/>
      <node id="67343" label="WDR66"/>
      <node id="67342" label="TP73"/>
      <node id="67341" label="MXI1"/>
      <node id="67340" label="MEF2B"/>
      <node id="67339" label="FXN"/>
      <node id="67338" label="ELF1"/>
      <node id="67337" label="TOR3A"/>
      <node id="67336" label="ELF3"/>
      <node id="67335" label="ZBTB1"/>
      <node id="67334" label="HES7"/>
      <node id="67333" label="HES5"/>
      <node id="67332" label="HES4"/>
      <node id="67331" label="ELK1"/>
      <node id="67330" label="TGS1"/>
      <node id="67329" label="SECISBP2L"/>
      <node id="67328" label="VEPH1"/>
      <node id="67327" label="BPNT1"/>
      <node id="67326" label="DCLRE1A"/>
      <node id="67325" label="BHLHE40"/>
      <node id="67324" label="ARNT"/>
      <node id="67323" label="SRM"/>
      <node id="67322" label="FBXL6"/>
      <node id="67321" label="ATAD3A"/>
      <node id="67320" label="MFSD3"/>
      <node id="67319" label="RECQL4"/>
      <node id="67318" label="NDUFS7"/>
      <node id="67317" label="FKBP2"/>
      <node id="67316" label="ABHD11"/>
      <node id="67315" label="APRT"/>
      <node id="67314" label="SIX5"/>
      <node id="67313" label="ETV2"/>
      <node id="67312" label="DNALI1"/>
      <node id="67311" label="AK8"/>
      <node id="67310" label="LRRC46"/>
      <node id="67309" label="PIH1D2"/>
      <node id="67308" label="C1orf192"/>
      <node id="67307" label="LRRC48"/>
      <node id="67306" label="ZHX1"/>
      <node id="67305" label="THAP1"/>
      <node id="67304" label="PRIM2"/>
      <node id="67303" label="EMC3"/>
      <node id="67302" label="PTK7"/>
      <node id="67301" label="ZBTB42"/>
      <node id="67300" label="TFEB"/>
      <node id="67299" label="STAT3"/>
      <node id="67298" label="COX8A"/>
      <node id="67297" label="B3GALT6"/>
      <node id="67296" label="UNG"/>
      <node id="67295" label="RMND5B"/>
      <node id="67294" label="GPI"/>
      <node id="67293" label="MTIF2"/>
      <node id="67292" label="G6PC3"/>
      <node id="67291" label="POP4"/>
      <node id="67290" label="RP4-758J18.2"/>
      <node id="67289" label="RFT1"/>
      <node id="67288" label="MCTS1"/>
      <node id="67287" label="SLC35B2"/>
      <node id="67286" label="DUOXA1"/>
      <node id="67285" label="EPRS"/>
      <node id="67284" label="CDCA4"/>
      <node id="67283" label="HSPA12B"/>
      <node id="67282" label="CHEK1"/>
      <node id="67281" label="GTSE1"/>
      <node id="67280" label="PITX2"/>
      <node id="67279" label="C16orf95"/>
      <node id="67278" label="RAE1"/>
      <node id="67277" label="ZKSCAN4"/>
      <node id="67276" label="DUS2"/>
      <node id="67275" label="CENPO"/>
      <node id="67274" label="CENPM"/>
      <node id="67273" label="NUDT22"/>
      <node id="67272" label="ZW10"/>
      <node id="67271" label="PSMB2"/>
      <node id="67270" label="TP53"/>
      <node id="67269" label="TIMM8B"/>
      <node id="67268" label="PRMT3"/>
      <node id="67267" label="PDCD11"/>
      <node id="67266" label="RHNO1"/>
      <node id="67265" label="MSTO1"/>
      <node id="67264" label="CDC20"/>
      <node id="67263" label="TYMS"/>
      <node id="67262" label="MYPOP"/>
      <node id="67261" label="ELF5"/>
      <node id="67260" label="ZBED3"/>
      <node id="67259" label="SSR3"/>
      <node id="67258" label="ARNTL"/>
      <node id="67257" label="ELOVL1"/>
      <node id="67256" label="C6orf211"/>
      <node id="67255" label="FDFT1"/>
      <node id="67254" label="SQRDL"/>
      <node id="67253" label="PFKFB2"/>
      <node id="67252" label="LGMN"/>
      <node id="67251" label="PRDX3"/>
      <node id="67250" label="SDHB"/>
      <node id="67249" label="CYP51A1"/>
      <node id="67248" label="GALNT10"/>
      <node id="67247" label="ZNF691"/>
      <node id="67246" label="TMEM243"/>
      <node id="67245" label="SLC25A16"/>
      <node id="67244" label="RPN2"/>
      <node id="67243" label="ATAD3C"/>
      <node id="67242" label="RCC1"/>
      <node id="67241" label="SND1"/>
      <node id="67240" label="HMGB3"/>
      <node id="67239" label="MRPS16"/>
      <node id="67238" label="ARL11"/>
      <node id="67237" label="TSPYL5"/>
      <node id="67236" label="GALE"/>
      <node id="67235" label="DFFA"/>
      <node id="67234" label="GRHL2"/>
      <node id="67233" label="RFC4"/>
      <node id="67232" label="POC1A"/>
      <node id="67231" label="PLK1"/>
      <node id="67230" label="USF1"/>
      <node id="67229" label="SREBF2"/>
      <node id="67228" label="UQCRQ"/>
      <node id="67227" label="SPDL1"/>
      <node id="67226" label="RRP36"/>
      <node id="67225" label="SASH3"/>
      <node id="67224" label="SMARCC2"/>
      <node id="67223" label="LTA4H"/>
      <node id="67222" label="AHCY"/>
      <node id="67221" label="MLX"/>
      <node id="67220" label="EEF1E1"/>
      <node id="67219" label="RAB20"/>
      <node id="67218" label="KIAA1522"/>
      <node id="67217" label="KLF13"/>
      <node id="67216" label="CYC1"/>
      <node id="67215" label="METTL2A"/>
      <node id="67214" label="CNPY2"/>
      <node id="67213" label="PRKCZ"/>
      <node id="67212" label="SLC26A9"/>
      <node id="67211" label="PHYH"/>
      <node id="67210" label="ATP6V0E1"/>
      <node id="67209" label="CRB3"/>
      <node id="67208" label="MTRR"/>
      <node id="67207" label="ADORA2B"/>
      <node id="67206" label="SERINC2"/>
      <node id="67205" label="FASN"/>
      <node id="67204" label="TMEM180"/>
      <node id="67203" label="NUDT16"/>
      <node id="67202" label="STEAP3"/>
      <node id="67201" label="FZD5"/>
      <node id="67200" label="NECAB3"/>
      <node id="67199" label="SLC31A2"/>
      <node id="67198" label="ALOX15B"/>
      <node id="67197" label="C1orf172"/>
      <node id="67196" label="MBIP"/>
      <node id="67195" label="BCAT2"/>
      <node id="67194" label="DCAF11"/>
      <node id="67193" label="USP44"/>
      <node id="67192" label="CCDC94"/>
      <node id="67191" label="LSR"/>
      <node id="67190" label="ASL"/>
      <node id="67189" label="FGFR2"/>
      <node id="67188" label="TFCP2L1"/>
      <node id="67187" label="MMAB"/>
      <node id="67186" label="ACOXL"/>
      <node id="67185" label="USF2"/>
      <node id="67184" label="AK1"/>
      <node id="67183" label="GUCD1"/>
      <node id="67182" label="GCAT"/>
      <node id="67181" label="TMEM204"/>
      <node id="67180" label="CNPPD1"/>
      <node id="67179" label="SMAGP"/>
      <node id="67178" label="TCF19"/>
      <node id="67177" label="SERPINF2"/>
      <node id="67176" label="URM1"/>
      <node id="67175" label="NAGLU"/>
      <node id="67174" label="PEPD"/>
      <node id="67173" label="C19orf10"/>
      <node id="67172" label="TFAP2C"/>
      <node id="67171" label="ALDH3B1"/>
      <node id="67170" label="FHDC1"/>
      <node id="67169" label="ZBTB33"/>
      <node id="67168" label="TBC1D2"/>
      <node id="67167" label="NPR1"/>
      <node id="67166" label="SLC30A6"/>
      <node id="67165" label="CLPTM1L"/>
      <node id="67164" label="LRRC25"/>
      <node id="67163" label="FAM105A"/>
      <node id="67162" label="NCF2"/>
      <node id="67161" label="GYPE"/>
      <node id="67160" label="ELOF1"/>
      <node id="67159" label="RRM2"/>
      <node id="67158" label="CDC45"/>
      <node id="67157" label="NRF1"/>
      <node id="67156" label="SMYD5"/>
      <node id="67155" label="ETV4"/>
      <node id="67154" label="IMPDH2"/>
      <node id="67153" label="ETV3"/>
      <node id="67152" label="CHID1"/>
      <node id="67151" label="VARS"/>
      <node id="67150" label="EHF"/>
      <node id="67149" label="MRPS2"/>
      <node id="67148" label="TOMM40"/>
      <node id="67147" label="PC"/>
      <node id="67146" label="KANK1"/>
      <node id="67145" label="AATK"/>
      <node id="67144" label="MLXIPL"/>
      <node id="67143" label="GPT2"/>
      <node id="67142" label="CTDNEP1"/>
      <node id="67141" label="RPH3AL"/>
      <node id="67140" label="DPM2"/>
      <node id="67139" label="FAM195A"/>
      <node id="67138" label="SCD"/>
      <node id="67137" label="PPP1R14C"/>
      <node id="67136" label="ALPL"/>
      <node id="67135" label="IDH2"/>
      <node id="67134" label="SURF4"/>
      <node id="67133" label="CPM"/>
      <node id="67132" label="POLR3H"/>
      <node id="67131" label="PNKD"/>
      <node id="67130" label="TLCD1"/>
      <node id="67129" label="RAB40C"/>
      <node id="67128" label="ABCC6"/>
      <node id="67127" label="RPS6KA2"/>
      <node id="67126" label="LAMP3"/>
      <node id="67125" label="PCSK9"/>
      <node id="67124" label="BRCA1"/>
      <node id="67123" label="FCGR1A"/>
      <node id="67122" label="ETV1"/>
      <node id="67121" label="MVB12B"/>
      <node id="67120" label="PDIA6"/>
      <node id="67119" label="ERF"/>
      <node id="67118" label="AP3M1"/>
      <node id="67117" label="DARS2"/>
      <node id="67116" label="PSMB4"/>
      <node id="67115" label="SCLY"/>
      <node id="67114" label="WDR89"/>
      <node id="67113" label="ATP5G1"/>
      <node id="67112" label="XRCC4"/>
      <node id="67111" label="RHOBTB2"/>
      <node id="67110" label="TANGO2"/>
      <node id="67109" label="TUBA1C"/>
      <node id="67108" label="PGAM1"/>
      <node id="67107" label="CNIH4"/>
      <node id="67106" label="LAGE3"/>
      <node id="67105" label="SNRPE"/>
      <node id="67104" label="RPL26L1"/>
      <node id="67103" label="MED8"/>
      <node id="67102" label="TEX264"/>
      <node id="67101" label="SLC25A39"/>
      <node id="67100" label="GOT1"/>
      <node id="67099" label="SCIMP"/>
      <node id="67098" label="FEN1"/>
      <node id="67097" label="TXNDC17"/>
      <node id="67096" label="TOPORS"/>
      <node id="67095" label="MRPS15"/>
      <node id="67094" label="MED20"/>
      <node id="67093" label="DCTN5"/>
      <node id="67092" label="GCSH"/>
      <node id="67091" label="TWF2"/>
      <node id="67090" label="SWSAP1"/>
      <node id="67089" label="GEMIN6"/>
      <node id="67088" label="DBI"/>
      <node id="67087" label="NSUN5"/>
      <node id="67086" label="MRPS10"/>
      <node id="67085" label="MGME1"/>
      <node id="67084" label="NDUFS8"/>
      <node id="67083" label="NDUFAF1"/>
      <node id="67082" label="ISOC2"/>
      <node id="67081" label="GHITM"/>
      <node id="67080" label="CNP"/>
      <node id="67079" label="NUP37"/>
      <node id="67078" label="SLC39A11"/>
      <node id="67077" label="FIBP"/>
      <node id="67076" label="KIF20A"/>
      <node id="67075" label="SKA1"/>
      <node id="67074" label="NR2F6"/>
      <node id="67073" label="NABP2"/>
      <node id="67072" label="KIF4A"/>
      <node id="67071" label="NR2F2"/>
      <node id="67070" label="ZSWIM1"/>
      <node id="67069" label="PIN1"/>
      <node id="67068" label="PIGO"/>
      <node id="67067" label="ACOT13"/>
      <node id="67066" label="C5orf63"/>
      <node id="67065" label="CCR2"/>
      <node id="67064" label="RP11-345J4.5"/>
      <node id="67063" label="LSM5"/>
      <node id="67062" label="DECR2"/>
      <node id="67061" label="CCNL2"/>
      <node id="67060" label="TMEM45B"/>
      <node id="67059" label="PLEK2"/>
      <node id="67058" label="DPEP2"/>
      <node id="67057" label="DOPEY2"/>
      <node id="67056" label="ZBTB9"/>
      <node id="67055" label="OPLAH"/>
      <node id="67054" label="HYAL1"/>
      <node id="67053" label="CHAF1A"/>
      <node id="67052" label="GPAM"/>
      <node id="67051" label="HARBI1"/>
      <node id="67050" label="PDCD6"/>
      <node id="67049" label="CCDC58"/>
      <node id="67048" label="EIF2AK1"/>
      <node id="67047" label="ARL1"/>
      <node id="67046" label="PALB2"/>
      <node id="67045" label="CLN3"/>
      <node id="67044" label="ZNF195"/>
      <node id="67043" label="TMA16"/>
      <node id="67042" label="FLVCR2"/>
      <node id="67041" label="CPOX"/>
      <node id="67040" label="BTF3L4"/>
      <node id="67039" label="PGBD2"/>
      <node id="67038" label="TMEM144"/>
      <node id="67037" label="C19orf40"/>
      <node id="67036" label="BRCC3"/>
      <node id="67035" label="DHRS7B"/>
      <node id="67034" label="POLR2D"/>
      <node id="67033" label="SNAP47"/>
      <node id="67032" label="FASTK"/>
      <node id="67031" label="MFSD9"/>
      <node id="67030" label="CECR5"/>
      <node id="67029" label="SLAMF8"/>
      <node id="67028" label="ELMO3"/>
      <node id="67027" label="SLC25A24"/>
      <node id="67026" label="NEU1"/>
      <node id="67025" label="FUT8"/>
      <node id="67024" label="RAP2B"/>
      <node id="67023" label="UQCRC2"/>
      <node id="67022" label="HDAC3"/>
      <node id="67021" label="SMUG1"/>
      <node id="67020" label="MEGF9"/>
      <node id="67019" label="ETFA"/>
      <node id="67018" label="PUSL1"/>
      <node id="67017" label="FERMT3"/>
      <node id="67016" label="PGLS"/>
      <node id="67015" label="TMEM147"/>
      <node id="67014" label="EHHADH"/>
      <node id="67013" label="RBBP4"/>
      <node id="67012" label="LYPLA1"/>
      <node id="67011" label="SORBS3"/>
      <node id="67010" label="CD53"/>
      <node id="67009" label="COG2"/>
      <node id="67008" label="ZNF362"/>
      <node id="67007" label="SIGLEC9"/>
      <node id="67006" label="HMBS"/>
      <node id="67005" label="TMCO1"/>
      <node id="67004" label="C21orf67"/>
      <node id="67003" label="MRPL24"/>
      <node id="67002" label="YIF1B"/>
      <node id="67001" label="NLN"/>
      <node id="67000" label="RABIF"/>
      <node id="66999" label="TMEM184A"/>
      <node id="66998" label="DCPS"/>
      <node id="66997" label="NUDT16L1"/>
      <node id="66996" label="NUDT8"/>
      <node id="66995" label="BRI3BP"/>
      <node id="66994" label="TMEM164"/>
      <node id="66993" label="SFXN2"/>
      <node id="66992" label="TMEM150B"/>
      <node id="66991" label="RPUSD1"/>
      <node id="66990" label="OSTC"/>
      <node id="66989" label="NSF"/>
      <node id="66988" label="SGOL2"/>
      <node id="66987" label="TRUB2"/>
      <node id="66986" label="NIPSNAP1"/>
      <node id="66985" label="HK3"/>
      <node id="66984" label="MRPL37"/>
      <node id="66983" label="CYB5A"/>
      <node id="66982" label="LAMTOR1"/>
      <node id="66981" label="HSD17B4"/>
      <node id="66980" label="ZSWIM7"/>
      <node id="66979" label="SPC25"/>
      <node id="66978" label="PSAT1"/>
      <node id="66977" label="DTYMK"/>
      <node id="66976" label="RILP"/>
      <node id="66975" label="RMI2"/>
      <node id="66974" label="SLC22A31"/>
      <node id="66973" label="SHMT2"/>
      <node id="66972" label="RAD51"/>
      <node id="66971" label="CISD3"/>
      <node id="66970" label="FOXM1"/>
      <node id="66969" label="AURKA"/>
      <node id="66968" label="TROAP"/>
      <node id="66967" label="SLC22A3"/>
      <node id="66966" label="CDCA5"/>
      <node id="66965" label="GABPA"/>
      <node id="66964" label="INTS7"/>
      <node id="66963" label="PSMD14"/>
      <node id="66962" label="RPA3"/>
      <node id="66961" label="GMIP"/>
      <node id="66960" label="METTL6"/>
      <node id="66959" label="PGBD4"/>
      <node id="66958" label="TTI1"/>
      <node id="66957" label="CCT5"/>
      <node id="66956" label="ATP5H"/>
      <node id="66955" label="TBCE"/>
      <node id="66954" label="GLYCTK"/>
      <node id="66953" label="COA6"/>
      <node id="66952" label="MRPL19"/>
      <node id="66951" label="AURKAIP1"/>
      <node id="66950" label="SDHC"/>
      <node id="66949" label="SLC25A20"/>
      <node id="66948" label="PTK6"/>
      <node id="66947" label="FH"/>
      <node id="66946" label="INTS5"/>
      <node id="66945" label="VPS25"/>
      <node id="66944" label="KLHL12"/>
      <node id="66943" label="SLX4"/>
      <node id="66942" label="TCTA"/>
      <node id="66941" label="ADAP1"/>
      <node id="66940" label="SLC37A4"/>
      <node id="66939" label="ACAA2"/>
      <node id="66938" label="GCDH"/>
      <node id="66937" label="MTCH2"/>
      <node id="66936" label="FAM118B"/>
      <node id="66935" label="EBP"/>
      <node id="66934" label="SNRNP25"/>
      <node id="66933" label="APMAP"/>
      <node id="66932" label="MYO1F"/>
      <node id="66931" label="ACOT1"/>
      <node id="66930" label="PHB"/>
      <node id="66929" label="B4GALT7"/>
      <node id="66928" label="C16orf70"/>
      <node id="66927" label="MRPL35"/>
      <node id="66926" label="TACC3"/>
      <node id="66925" label="BIN2"/>
      <node id="66924" label="NUDT5"/>
      <node id="66923" label="CHCHD1"/>
      <node id="66922" label="CORO1A"/>
      <node id="66921" label="FADD"/>
      <node id="66920" label="FRAT1"/>
      <node id="66919" label="CHPF2"/>
      <node id="66918" label="UQCC2"/>
      <node id="66917" label="TMED1"/>
      <node id="66916" label="DHDDS"/>
      <node id="66915" label="LRRC20"/>
      <node id="66914" label="MRPL13"/>
      <node id="66913" label="C17orf62"/>
      <node id="66912" label="ANAPC11"/>
      <node id="66911" label="TSTA3"/>
      <node id="66910" label="SMIM4"/>
      <node id="66909" label="C19orf24"/>
      <node id="66908" label="NSDHL"/>
      <node id="66907" label="SLC1A4"/>
      <node id="66906" label="TTPAL"/>
      <node id="66905" label="SLC27A4"/>
      <node id="66904" label="SIRT7"/>
      <node id="66903" label="AACS"/>
      <node id="66902" label="C14orf1"/>
      <node id="66901" label="METTL7B"/>
      <node id="66900" label="TSPAN3"/>
      <node id="66899" label="ALG5"/>
      <node id="66898" label="STT3A"/>
      <node id="66897" label="CENPI"/>
      <node id="66896" label="PAK6"/>
      <node id="66895" label="HM13"/>
      <node id="66894" label="FICD"/>
      <node id="66893" label="PDIA4"/>
      <node id="66892" label="ASF1B"/>
      <node id="66891" label="ETV6"/>
      <node id="66890" label="TP53I3"/>
      <node id="66889" label="PARK7"/>
      <node id="66888" label="EXOSC1"/>
      <node id="66887" label="PGAM5"/>
      <node id="66886" label="EXOSC4"/>
      <node id="66885" label="ACP5"/>
      <node id="66884" label="SSR2"/>
      <node id="66883" label="SPRYD7"/>
      <node id="66882" label="JMJD4"/>
      <node id="66881" label="ATP5F1"/>
      <node id="66880" label="ACAD10"/>
      <node id="66879" label="MRS2"/>
      <node id="66878" label="STOML2"/>
      <node id="66877" label="STAC3"/>
      <node id="66876" label="EHMT2"/>
      <node id="66875" label="TXN2"/>
      <node id="66874" label="IPO13"/>
      <node id="66873" label="CTNS"/>
      <node id="66872" label="DHRS4L2"/>
      <node id="66871" label="EDEM2"/>
      <node id="66870" label="ALDH4A1"/>
      <node id="66869" label="MRPS11"/>
      <node id="66868" label="C5"/>
      <node id="66867" label="KCTD14"/>
      <node id="66866" label="SRD5A1"/>
      <node id="66865" label="ATP6V1F"/>
      <node id="66864" label="EXOSC5"/>
      <node id="66863" label="LAMTOR2"/>
      <node id="66862" label="ACAT1"/>
      <node id="66861" label="RNASEH2A"/>
      <node id="66860" label="PAQR4"/>
      <node id="66859" label="POLDIP2"/>
      <node id="66858" label="B9D2"/>
      <node id="66857" label="PXMP4"/>
      <node id="66856" label="SNF8"/>
      <node id="66855" label="ALOX5AP"/>
      <node id="66854" label="PBK"/>
      <node id="66853" label="SNX30"/>
      <node id="66852" label="PKMYT1"/>
      <node id="66851" label="ECE2"/>
      <node id="66850" label="NLRC4"/>
      <node id="66849" label="ELF4"/>
      <node id="66848" label="ZNF696"/>
      <node id="66847" label="JAGN1"/>
      <node id="66846" label="ZNF469"/>
      <node id="66845" label="MLYCD"/>
      <node id="66844" label="HYAL2"/>
      <node id="66843" label="COQ2"/>
      <node id="66842" label="TARS2"/>
      <node id="66841" label="GPAA1"/>
      <node id="66840" label="POLR1B"/>
      <node id="66839" label="RPS6KA4"/>
      <node id="66838" label="ADCK1"/>
      <node id="66837" label="C10orf2"/>
      <node id="66836" label="COX10"/>
      <node id="66835" label="CENPBD1"/>
      <node id="66834" label="FASTKD3"/>
      <node id="66833" label="CD180"/>
      <node id="66832" label="FAM173B"/>
      <node id="66831" label="MRPL36"/>
      <node id="66830" label="NDUFS1"/>
      <node id="66829" label="PSMG3"/>
      <node id="66828" label="B3GNT7"/>
      <node id="66827" label="TBRG4"/>
      <node id="66826" label="CCDC137"/>
      <node id="66825" label="METTL1"/>
      <node id="66824" label="TBXAS1"/>
      <node id="66823" label="TMEM106A"/>
      <node id="66822" label="SLC25A15"/>
      <node id="66821" label="BRAT1"/>
      <node id="66820" label="TPD52L2"/>
      <node id="66819" label="ITGAM"/>
      <node id="66818" label="ASAH2B"/>
      <node id="66817" label="TBCC"/>
      <node id="66816" label="CD163"/>
      <node id="66815" label="TSR3"/>
      <node id="66814" label="FA2H"/>
      <node id="66813" label="MRPL27"/>
      <node id="66812" label="SDCCAG3"/>
      <node id="66811" label="CDC123"/>
      <node id="66810" label="MRPS35"/>
      <node id="66809" label="NCLN"/>
      <node id="66808" label="PDF"/>
      <node id="66807" label="PYCRL"/>
      <node id="66806" label="NIF3L1"/>
      <node id="66805" label="NUDT19"/>
      <node id="66804" label="IGSF6"/>
      <node id="66803" label="GEMIN7"/>
      <node id="66802" label="VPS33A"/>
      <node id="66801" label="TAF6L"/>
      <node id="66800" label="PRR19"/>
      <node id="66799" label="GJA5"/>
      <node id="66798" label="RRAGA"/>
      <node id="66797" label="RCCD1"/>
      <node id="66796" label="BRMS1"/>
      <node id="66795" label="THAP8"/>
      <node id="66794" label="DDX41"/>
      <node id="66793" label="PTCD2"/>
      <node id="66792" label="ACBD6"/>
      <node id="66791" label="ST14"/>
      <node id="66790" label="TACO1"/>
      <node id="66789" label="MS4A4A"/>
      <node id="66788" label="IMMT"/>
      <node id="66787" label="C11orf1"/>
      <node id="66786" label="MAP2K2"/>
      <node id="66785" label="C1orf162"/>
      <node id="66784" label="FAM103A1"/>
      <node id="66783" label="TBL2"/>
      <node id="66782" label="AIMP2"/>
      <node id="66781" label="TMEM141"/>
      <node id="66780" label="SLC39A3"/>
      <node id="66779" label="PSMD8"/>
      <node id="66778" label="SCAMP3"/>
      <node id="66777" label="RAB42"/>
      <node id="66776" label="ZDHHC12"/>
      <node id="66775" label="GTF3C6"/>
      <node id="66774" label="HN1"/>
      <node id="66773" label="DOK3"/>
      <node id="66772" label="IDH1"/>
      <node id="66771" label="ATPAF1"/>
      <node id="66770" label="CPT2"/>
      <node id="66769" label="ADORA3"/>
      <node id="66768" label="SNUPN"/>
      <node id="66767" label="PSMC2"/>
      <node id="66766" label="CUL7"/>
      <node id="66765" label="LCMT1"/>
      <node id="66764" label="ASAH1"/>
      <node id="66763" label="LACTB2"/>
      <node id="66762" label="POLR3B"/>
      <node id="66761" label="FAH"/>
      <node id="66760" label="NFS1"/>
      <node id="66759" label="PCCB"/>
      <node id="66758" label="MPI"/>
      <node id="66757" label="CISD2"/>
      <node id="66756" label="MMP28"/>
      <node id="66755" label="GIMAP6"/>
      <node id="66754" label="BLNK"/>
      <node id="66753" label="HDHD3"/>
      <node id="66752" label="CIAO1"/>
      <node id="66751" label="DLAT"/>
      <node id="66750" label="TSFM"/>
      <node id="66749" label="MILR1"/>
      <node id="66748" label="RABEP2"/>
      <node id="66747" label="MTG1"/>
      <node id="66746" label="L2HGDH"/>
      <node id="66745" label="GRB2"/>
      <node id="66744" label="C9orf69"/>
      <node id="66743" label="DERL2"/>
      <node id="66742" label="XYLB"/>
      <node id="66741" label="PLIN5"/>
      <node id="66740" label="PCBD2"/>
      <node id="66739" label="FTSJ2"/>
      <node id="66738" label="MRPS23"/>
      <node id="66737" label="DAK"/>
      <node id="66736" label="TMEM261"/>
      <node id="66735" label="NDUFA8"/>
      <node id="66734" label="SLC25A4"/>
      <node id="66733" label="RRP1B"/>
      <node id="66732" label="C19orf59"/>
      <node id="66731" label="MRPL4"/>
      <node id="66730" label="PES1"/>
      <node id="66729" label="VPS11"/>
      <node id="66728" label="MECR"/>
      <node id="66727" label="ATP13A2"/>
      <node id="66726" label="TMEM92"/>
      <node id="66725" label="SDC1"/>
      <node id="66724" label="YKT6"/>
      <node id="66723" label="ARHGAP30"/>
      <node id="66722" label="TKT"/>
      <node id="66721" label="ISCA2"/>
      <node id="66720" label="ST3GAL5"/>
      <node id="66719" label="DOK2"/>
      <node id="66718" label="EMILIN2"/>
      <node id="66717" label="WBSCR16"/>
      <node id="66716" label="ARPC1B"/>
      <node id="66715" label="PDCD2L"/>
      <node id="66714" label="ABRACL"/>
      <node id="66713" label="TREM2"/>
      <node id="66712" label="RAN"/>
      <node id="66711" label="PREB"/>
      <node id="66710" label="BLOC1S4"/>
      <node id="66709" label="ARHGEF19"/>
      <node id="66708" label="LEO1"/>
      <node id="66707" label="MRPL44"/>
      <node id="66706" label="UQCRC1"/>
      <node id="66705" label="TOR4A"/>
      <node id="66704" label="FARSA"/>
      <node id="66703" label="EXO5"/>
      <node id="66702" label="AP1B1"/>
      <node id="66701" label="NLE1"/>
      <node id="66700" label="PRPF19"/>
      <node id="66699" label="SSR1"/>
      <node id="66698" label="MFSD5"/>
      <node id="66697" label="PET112"/>
      <node id="66696" label="PPP1CA"/>
      <node id="66695" label="TMEM222"/>
      <node id="66694" label="IRX2"/>
      <node id="66693" label="SPHK2"/>
      <node id="66692" label="WDR81"/>
      <node id="66691" label="TRAPPC1"/>
      <node id="66690" label="DUOX1"/>
      <node id="66689" label="AIF1"/>
      <node id="66688" label="COMMD9"/>
      <node id="66687" label="ZFYVE19"/>
      <node id="66686" label="ARMC6"/>
      <node id="66685" label="SNRPC"/>
      <node id="66684" label="POLR3K"/>
      <node id="66683" label="SLC7A7"/>
      <node id="66682" label="PARS2"/>
      <node id="66681" label="MS4A7"/>
      <node id="66680" label="CYB5RL"/>
      <node id="66679" label="SYK"/>
      <node id="66678" label="FGR"/>
      <node id="66677" label="TMEM223"/>
      <node id="66676" label="SPRYD4"/>
      <node id="66675" label="ICT1"/>
      <node id="66674" label="APOA1BP"/>
      <node id="66673" label="PREP"/>
      <node id="66672" label="ITPA"/>
      <node id="66671" label="TLR8"/>
      <node id="66670" label="AARS2"/>
      <node id="66669" label="COX6B1"/>
      <node id="66668" label="C1orf233"/>
      <node id="66667" label="FOXRED1"/>
      <node id="66666" label="DENR"/>
      <node id="66665" label="KDELR1"/>
      <node id="66664" label="ESRP2"/>
      <node id="66663" label="MRPS27"/>
      <node id="66662" label="GPX1"/>
      <node id="66661" label="FBXO41"/>
      <node id="66660" label="GLB1"/>
      <node id="66659" label="MRPS12"/>
      <node id="66658" label="MTX2"/>
      <node id="66657" label="EGFL7"/>
      <node id="66656" label="SEPHS2"/>
      <node id="66655" label="TTI2"/>
      <node id="66654" label="DYX1C1"/>
      <node id="66653" label="ABCB8"/>
      <node id="66652" label="FUNDC1"/>
      <node id="66651" label="ADSL"/>
      <node id="66650" label="SEC23B"/>
      <node id="66649" label="ITGB2"/>
      <node id="66648" label="FCGR1B"/>
      <node id="66647" label="MMACHC"/>
      <node id="66646" label="SELPLG"/>
      <node id="66645" label="ECHS1"/>
      <node id="66644" label="RPP40"/>
      <node id="66643" label="MDH2"/>
      <node id="66642" label="AP5S1"/>
      <node id="66641" label="C1orf53"/>
      <node id="66640" label="CCM2L"/>
      <node id="66639" label="GNPDA1"/>
      <node id="66638" label="TTLL12"/>
      <node id="66637" label="GPD1L"/>
      <node id="66636" label="SSBP1"/>
      <node id="66635" label="NRGN"/>
      <node id="66634" label="UROS"/>
      <node id="66633" label="CCDC167"/>
      <node id="66632" label="MYD88"/>
      <node id="66631" label="FAM86C1"/>
      <node id="66630" label="SF3B5"/>
      <node id="66629" label="DCAF13"/>
      <node id="66628" label="MYO7A"/>
      <node id="66627" label="PRAM1"/>
      <node id="66626" label="MRPL15"/>
      <node id="66625" label="SLC5A6"/>
      <node id="66624" label="MRPS33"/>
      <node id="66623" label="MPV17"/>
      <node id="66622" label="TSSC1"/>
      <node id="66621" label="TDRKH"/>
      <node id="66620" label="EARS2"/>
      <node id="66619" label="DCTPP1"/>
      <node id="66618" label="IRAK1"/>
      <node id="66617" label="UMPS"/>
      <node id="66616" label="RGS19"/>
      <node id="66615" label="APOBR"/>
      <node id="66614" label="SNX17"/>
      <node id="66613" label="FAM86A"/>
      <node id="66612" label="LYL1"/>
      <node id="66611" label="COX5A"/>
      <node id="66610" label="FAM173A"/>
      <node id="66609" label="TMEM79"/>
      <node id="66608" label="TFAP4"/>
      <node id="66607" label="SLC35A4"/>
      <node id="66606" label="TRIP13"/>
      <node id="66605" label="NDC1"/>
      <node id="66604" label="RBM47"/>
      <node id="66603" label="CNDP2"/>
      <node id="66602" label="NAT10"/>
      <node id="66601" label="THNSL1"/>
      <node id="66600" label="FUT3"/>
      <node id="66599" label="COPE"/>
      <node id="66598" label="MACROD2"/>
      <node id="66597" label="GSTZ1"/>
      <node id="66596" label="ENC1"/>
      <node id="66595" label="C9orf156"/>
      <node id="66594" label="PTAFR"/>
      <node id="66593" label="METTL13"/>
      <node id="66592" label="CTSA"/>
      <node id="66591" label="SRD5A3"/>
      <node id="66590" label="SYS1"/>
      <node id="66589" label="KCNJ15"/>
      <node id="66588" label="CLEC14A"/>
      <node id="66587" label="BRI3"/>
      <node id="66586" label="SLC35C1"/>
      <node id="66585" label="DNPH1"/>
      <node id="66584" label="DIEXF"/>
      <node id="66583" label="ULK3"/>
      <node id="66582" label="HYLS1"/>
      <node id="66581" label="NECAB1"/>
      <node id="66580" label="GBA"/>
      <node id="66579" label="C1orf85"/>
      <node id="66578" label="THEM6"/>
      <node id="66577" label="C3AR1"/>
      <node id="66576" label="COQ9"/>
      <node id="66575" label="CPSF3"/>
      <node id="66574" label="TIMM13"/>
      <node id="66573" label="LIMS2"/>
      <node id="66572" label="CDK5"/>
      <node id="66571" label="PARP1"/>
      <node id="66570" label="FIGNL1"/>
      <node id="66569" label="C19orf48"/>
      <node id="66568" label="PTCD1"/>
      <node id="66567" label="MFAP3L"/>
      <node id="66566" label="LSS"/>
      <node id="66565" label="MLST8"/>
      <node id="66564" label="MID1IP1"/>
      <node id="66563" label="FEM1A"/>
      <node id="66562" label="TMEM199"/>
      <node id="66561" label="PYCR1"/>
      <node id="66560" label="GOT2"/>
      <node id="66559" label="ILDR1"/>
      <node id="66558" label="RER1"/>
      <node id="66557" label="SLC35B1"/>
      <node id="66556" label="CSTF2"/>
      <node id="66555" label="RENBP"/>
      <node id="66554" label="FLRT3"/>
      <node id="66553" label="PCNA"/>
      <node id="66552" label="CD300LF"/>
      <node id="66551" label="AKR1A1"/>
      <node id="66550" label="CD33"/>
      <node id="66549" label="ERAL1"/>
      <node id="66548" label="RNH1"/>
      <node id="66547" label="COPG1"/>
      <node id="66546" label="ACADS"/>
      <node id="66545" label="SLC46A1"/>
      <node id="66544" label="CLN6"/>
      <node id="66543" label="ATP5G3"/>
      <node id="66542" label="SAC3D1"/>
      <node id="66541" label="LAIR1"/>
      <node id="66540" label="SLC25A11"/>
      <node id="66539" label="CENPH"/>
      <node id="66538" label="DAP3"/>
      <node id="66537" label="SUOX"/>
      <node id="66536" label="TMEM69"/>
      <node id="66535" label="LMAN2"/>
      <node id="66534" label="C1QBP"/>
      <node id="66533" label="AP1S1"/>
      <node id="66532" label="MRPS34"/>
      <node id="66531" label="MUL1"/>
      <node id="66530" label="OCIAD2"/>
      <node id="66529" label="CCR1"/>
      <node id="66528" label="SFXN4"/>
      <node id="66527" label="POLR2C"/>
      <node id="66526" label="CHMP4C"/>
      <node id="66525" label="COPZ1"/>
      <node id="66524" label="CAPN3"/>
      <node id="66523" label="DPP3"/>
      <node id="66522" label="HYOU1"/>
      <node id="66521" label="MRM1"/>
      <node id="66520" label="GPR34"/>
      <node id="66519" label="APEX1"/>
      <node id="66518" label="SCAMP4"/>
      <node id="66517" label="TMEM116"/>
      <node id="66516" label="FAM64A"/>
      <node id="66515" label="DDOST"/>
      <node id="66514" label="BEX2"/>
      <node id="66513" label="MFSD2A"/>
      <node id="66512" label="GSTA4"/>
      <node id="66511" label="TMEM41A"/>
      <node id="66510" label="GMPPA"/>
      <node id="66509" label="C2"/>
      <node id="66508" label="SEC13"/>
      <node id="66507" label="MANEAL"/>
      <node id="66506" label="APEH"/>
      <node id="66505" label="TRAIP"/>
      <node id="66504" label="BDH1"/>
      <node id="66503" label="SLC39A8"/>
      <node id="66502" label="CCDC71"/>
      <node id="66501" label="TMED3"/>
      <node id="66500" label="YIF1A"/>
      <node id="66499" label="S1PR4"/>
      <node id="66498" label="ANKEF1"/>
      <node id="66497" label="PAFAH1B3"/>
      <node id="66496" label="NUBP1"/>
      <node id="66495" label="TTC39A"/>
      <node id="66494" label="FAM203A"/>
      <node id="66493" label="MND1"/>
      <node id="66492" label="DOLPP1"/>
      <node id="66491" label="PRDX4"/>
      <node id="66490" label="DRAM1"/>
      <node id="66489" label="FPR3"/>
      <node id="66488" label="RNASE6"/>
      <node id="66487" label="SLC38A7"/>
      <node id="66486" label="NME6"/>
      <node id="66485" label="B3GNT8"/>
      <node id="66484" label="TONSL"/>
      <node id="66483" label="C21orf33"/>
      <node id="66482" label="FAM136A"/>
      <node id="66481" label="MEF2BNB"/>
      <node id="66480" label="MIS18A"/>
      <node id="66479" label="KCNK1"/>
      <node id="66478" label="PCK2"/>
      <node id="66477" label="MARVELD3"/>
      <node id="66476" label="ALG3"/>
      <node id="66475" label="VPS18"/>
      <node id="66474" label="WDR12"/>
      <node id="66473" label="FLAD1"/>
      <node id="66472" label="AAR2"/>
      <node id="66471" label="AGPAT2"/>
      <node id="66470" label="OIP5"/>
      <node id="66469" label="AIFM1"/>
      <node id="66468" label="EME1"/>
      <node id="66467" label="SKA3"/>
      <node id="66466" label="EPDR1"/>
      <node id="66465" label="MRPL3"/>
      <node id="66464" label="MCM4"/>
      <node id="66463" label="PTPN13"/>
      <node id="66462" label="CYB561D2"/>
      <node id="66461" label="KIAA0101"/>
      <node id="66460" label="TMEM177"/>
      <node id="66459" label="SYT15"/>
      <node id="66458" label="MON1A"/>
      <node id="66457" label="LYRM2"/>
      <node id="66456" label="TFB2M"/>
      <node id="66455" label="GINS2"/>
      <node id="66454" label="LRRK2"/>
      <node id="66453" label="FITM2"/>
      <node id="66452" label="HMMR"/>
      <node id="66451" label="TIMELESS"/>
      <node id="66450" label="TMEM163"/>
      <node id="66449" label="MPDU1"/>
      <node id="66448" label="PDHB"/>
      <node id="66447" label="SAPCD2"/>
      <node id="66446" label="SLC25A10"/>
      <node id="66445" label="VSIG4"/>
      <node id="66444" label="MCM2"/>
      <node id="66443" label="C16orf59"/>
      <node id="66442" label="SLC52A2"/>
      <node id="66441" label="ALG1"/>
      <node id="66440" label="CCT3"/>
      <node id="66439" label="CCNB1"/>
      <node id="66438" label="FAM111B"/>
      <node id="66437" label="SNX25"/>
      <node id="66436" label="PLA2G4F"/>
      <node id="66435" label="ZWINT"/>
      <node id="66434" label="FMO5"/>
      <node id="66433" label="ABCA3"/>
      <node id="66432" label="ELK4"/>
      <edge id="82098" label="CENPA (GCN) CSTF2" source="67475" target="66556" cy:directed="1"/>
      <edge id="82097" label="ZNF219 (GRN) CSTF2" source="67474" target="66556" cy:directed="1"/>
      <edge id="82096" label="ZNF219 (GRN) CENPA" source="67474" target="67475" cy:directed="1"/>
      <edge id="82095" label="ZFHX3 (GRN) SLIT2" source="67473" target="67988" cy:directed="1"/>
      <edge id="82094" label="ZFHX3 (GRN) CAMK2N1" source="67473" target="67464" cy:directed="1"/>
      <edge id="82093" label="POU4F2 (GRN) SLIT2" source="67472" target="67988" cy:directed="1"/>
      <edge id="82092" label="POU4F2 (GRN) CAMK2N1" source="67472" target="67464" cy:directed="1"/>
      <edge id="82091" label="POU3F3 (GRN) SLIT2" source="67471" target="67988" cy:directed="1"/>
      <edge id="82090" label="POU3F3 (GRN) CAMK2N1" source="67471" target="67464" cy:directed="1"/>
      <edge id="82089" label="MSX2 (GRN) SLIT2" source="67470" target="67988" cy:directed="1"/>
      <edge id="82088" label="MSX2 (GRN) CAMK2N1" source="67470" target="67464" cy:directed="1"/>
      <edge id="82087" label="LIN54 (GRN) SLIT2" source="67469" target="67988" cy:directed="1"/>
      <edge id="82086" label="LIN54 (GRN) CAMK2N1" source="67469" target="67464" cy:directed="1"/>
      <edge id="82085" label="LHX1 (GRN) SLIT2" source="67468" target="67988" cy:directed="1"/>
      <edge id="82084" label="LHX1 (GRN) CAMK2N1" source="67468" target="67464" cy:directed="1"/>
      <edge id="82083" label="FOXB1 (GRN) SLIT2" source="67467" target="67988" cy:directed="1"/>
      <edge id="82082" label="FOXB1 (GRN) CAMK2N1" source="67467" target="67464" cy:directed="1"/>
      <edge id="82081" label="BCL6 (GRN) SLIT2" source="67466" target="67988" cy:directed="1"/>
      <edge id="82080" label="BCL6 (GRN) CAMK2N1" source="67466" target="67464" cy:directed="1"/>
      <edge id="82079" label="BARX1 (GRN) SLIT2" source="67465" target="67988" cy:directed="1"/>
      <edge id="82078" label="BARX1 (GRN) CAMK2N1" source="67465" target="67464" cy:directed="1"/>
      <edge id="82077" label="CAMK2N1 (GCN) SLIT2" source="67464" target="67988" cy:directed="1"/>
      <edge id="82076" label="MSX1 (GRN) SLIT2" source="67463" target="67988" cy:directed="1"/>
      <edge id="82075" label="MSX1 (GRN) CAMK2N1" source="67463" target="67464" cy:directed="1"/>
      <edge id="82074" label="TBX20 (GRN) C22orf15" source="67462" target="67353" cy:directed="1"/>
      <edge id="82073" label="TBX20 (GRN) TIGD4" source="67462" target="67388" cy:directed="1"/>
      <edge id="82072" label="KMT2A (GRN) TIGD4" source="67461" target="67388" cy:directed="1"/>
      <edge id="82071" label="KMT2A (GRN) WDR16" source="67461" target="67377" cy:directed="1"/>
      <edge id="82070" label="GMEB1 (GRN) PARN" source="67460" target="67495" cy:directed="1"/>
      <edge id="82069" label="GMEB1 (GRN) SECISBP2L" source="67460" target="67329" cy:directed="1"/>
      <edge id="82068" label="GMEB1 (GRN) FGFR2" source="67460" target="67189" cy:directed="1"/>
      <edge id="82067" label="FOXK1 (GRN) CCDC65" source="67459" target="67934" cy:directed="1"/>
      <edge id="82066" label="FOXK1 (GRN) LRRC46" source="67459" target="67310" cy:directed="1"/>
      <edge id="82065" label="FOXK1 (GRN) PPIL6" source="67459" target="67358" cy:directed="1"/>
      <edge id="82064" label="FOXK1 (GRN) PIH1D2" source="67459" target="67309" cy:directed="1"/>
      <edge id="82063" label="FOXK1 (GRN) CETN2" source="67459" target="67352" cy:directed="1"/>
      <edge id="82062" label="FOXK1 (GRN) C1orf192" source="67459" target="67308" cy:directed="1"/>
      <edge id="82061" label="ATOH8 (GRN) CPSF3" source="67458" target="66575" cy:directed="1"/>
      <edge id="82060" label="ATOH8 (GRN) PARN" source="67458" target="67495" cy:directed="1"/>
      <edge id="82059" label="ATOH8 (GRN) TGS1" source="67458" target="67330" cy:directed="1"/>
      <edge id="82058" label="ATOH8 (GRN) SNX25" source="67458" target="66437" cy:directed="1"/>
      <edge id="82057" label="ATOH8 (GRN) LRRK2" source="67458" target="66454" cy:directed="1"/>
      <edge id="82056" label="JUN (GRN) CCDC13" source="67457" target="67399" cy:directed="1"/>
      <edge id="82055" label="JUN (GRN) RHOV" source="67457" target="67369" cy:directed="1"/>
      <edge id="82054" label="TLX2 (GRN) LRRC46" source="67456" target="67310" cy:directed="1"/>
      <edge id="82053" label="TLX2 (GRN) LRRC48" source="67456" target="67307" cy:directed="1"/>
      <edge id="82052" label="SMAD3 (GRN) C22orf15" source="67455" target="67353" cy:directed="1"/>
      <edge id="82051" label="SMAD3 (GRN) LRRC46" source="67455" target="67310" cy:directed="1"/>
      <edge id="82050" label="SMAD3 (GRN) TIGD4" source="67455" target="67388" cy:directed="1"/>
      <edge id="82049" label="SMAD3 (GRN) PIH1D2" source="67455" target="67309" cy:directed="1"/>
      <edge id="82048" label="SMAD3 (GRN) C1orf192" source="67455" target="67308" cy:directed="1"/>
      <edge id="82047" label="SCRT1 (GRN) C22orf15" source="67454" target="67353" cy:directed="1"/>
      <edge id="82046" label="SCRT1 (GRN) TIGD4" source="67454" target="67388" cy:directed="1"/>
      <edge id="82045" label="THRA (GRN) PARN" source="67453" target="67495" cy:directed="1"/>
      <edge id="82044" label="THRA (GRN) SNX25" source="67453" target="66437" cy:directed="1"/>
      <edge id="82043" label="THRA (GRN) LRRK2" source="67453" target="66454" cy:directed="1"/>
      <edge id="82042" label="ATF6 (GRN) PARN" source="67452" target="67495" cy:directed="1"/>
      <edge id="82041" label="ATF6 (GRN) SNX25" source="67452" target="66437" cy:directed="1"/>
      <edge id="82040" label="MGA (GRN) PARN" source="67451" target="67495" cy:directed="1"/>
      <edge id="82039" label="MGA (GRN) SNX25" source="67451" target="66437" cy:directed="1"/>
      <edge id="82038" label="RFX1 (GRN) DTHD1" source="67450" target="67961" cy:directed="1"/>
      <edge id="82037" label="RFX1 (GRN) C9orf24" source="67450" target="67928" cy:directed="1"/>
      <edge id="82036" label="RFX1 (GRN) CCDC65" source="67450" target="67934" cy:directed="1"/>
      <edge id="82035" label="RFX1 (GRN) ZMYND10" source="67450" target="67344" cy:directed="1"/>
      <edge id="82034" label="RFX1 (GRN) OTX1" source="67450" target="67390" cy:directed="1"/>
      <edge id="82033" label="RFX1 (GRN) PAX9" source="67450" target="67382" cy:directed="1"/>
      <edge id="82032" label="RFX1 (GRN) FANK1" source="67450" target="67361" cy:directed="1"/>
      <edge id="82031" label="RFX1 (GRN) TP73" source="67450" target="67342" cy:directed="1"/>
      <edge id="82030" label="GCM1 (GRN) PARN" source="67449" target="67495" cy:directed="1"/>
      <edge id="82029" label="GCM1 (GRN) SNX25" source="67449" target="66437" cy:directed="1"/>
      <edge id="82028" label="GCM1 (GRN) LRRK2" source="67449" target="66454" cy:directed="1"/>
      <edge id="82027" label="MEF2D (GRN) GMPPA" source="67448" target="66510" cy:directed="1"/>
      <edge id="82026" label="MEF2D (GRN) LAMTOR1" source="67448" target="66982" cy:directed="1"/>
      <edge id="82025" label="MEF2D (GRN) DTYMK" source="67448" target="66977" cy:directed="1"/>
      <edge id="82024" label="MEF2D (GRN) SLC25A39" source="67448" target="67101" cy:directed="1"/>
      <edge id="82023" label="NR3C2 (GRN) PARN" source="67447" target="67495" cy:directed="1"/>
      <edge id="82022" label="NR3C2 (GRN) SNX25" source="67447" target="66437" cy:directed="1"/>
      <edge id="82021" label="ETS1 (GRN) PARN" source="67446" target="67495" cy:directed="1"/>
      <edge id="82020" label="ETS1 (GRN) SECISBP2L" source="67446" target="67329" cy:directed="1"/>
      <edge id="82019" label="ETS1 (GRN) SNX25" source="67446" target="66437" cy:directed="1"/>
      <edge id="82018" label="YBX1 (GRN) PARN" source="67445" target="67495" cy:directed="1"/>
      <edge id="82017" label="YBX1 (GRN) SNX25" source="67445" target="66437" cy:directed="1"/>
      <edge id="82016" label="TFDP1 (GRN) CDKL2" source="67444" target="67482" cy:directed="1"/>
      <edge id="82015" label="TFDP1 (GRN) NECAB1" source="67444" target="66581" cy:directed="1"/>
      <edge id="82014" label="E2F1 (GRN) KIAA0408" source="67443" target="67987" cy:directed="1"/>
      <edge id="82013" label="E2F1 (GRN) CDKL2" source="67443" target="67482" cy:directed="1"/>
      <edge id="82012" label="E2F1 (GRN) PARN" source="67443" target="67495" cy:directed="1"/>
      <edge id="82011" label="E2F1 (GRN) SECISBP2L" source="67443" target="67329" cy:directed="1"/>
      <edge id="82010" label="E2F1 (GRN) NECAB1" source="67443" target="66581" cy:directed="1"/>
      <edge id="82009" label="E2F1 (GRN) SNX25" source="67443" target="66437" cy:directed="1"/>
      <edge id="82008" label="CENPB (GRN) CDKL2" source="67442" target="67482" cy:directed="1"/>
      <edge id="82007" label="CENPB (GRN) PARN" source="67442" target="67495" cy:directed="1"/>
      <edge id="82006" label="CENPB (GRN) NECAB1" source="67442" target="66581" cy:directed="1"/>
      <edge id="82005" label="CENPB (GRN) SNX25" source="67442" target="66437" cy:directed="1"/>
      <edge id="82004" label="CENPB (GRN) LRRK2" source="67442" target="66454" cy:directed="1"/>
      <edge id="82003" label="TCFL5 (GRN) CDKL2" source="67441" target="67482" cy:directed="1"/>
      <edge id="82002" label="TCFL5 (GRN) PARN" source="67441" target="67495" cy:directed="1"/>
      <edge id="82001" label="TCFL5 (GRN) NECAB1" source="67441" target="66581" cy:directed="1"/>
      <edge id="82000" label="TCFL5 (GRN) SNX25" source="67441" target="66437" cy:directed="1"/>
      <edge id="81999" label="TCFL5 (GRN) PTPN13" source="67441" target="66463" cy:directed="1"/>
      <edge id="81998" label="STAT1 (GRN) MRPL3" source="67440" target="66465" cy:directed="1"/>
      <edge id="81997" label="STAT1 (GRN) LYRM2" source="67440" target="66457" cy:directed="1"/>
      <edge id="81996" label="GMEB2 (GRN) PARN" source="67439" target="67495" cy:directed="1"/>
      <edge id="81995" label="GMEB2 (GRN) SNX25" source="67439" target="66437" cy:directed="1"/>
      <edge id="81994" label="HEY1 (GRN) PARN" source="67438" target="67495" cy:directed="1"/>
      <edge id="81993" label="HEY1 (GRN) SNX25" source="67438" target="66437" cy:directed="1"/>
      <edge id="81992" label="FLI1 (GRN) CDKL2" source="67437" target="67482" cy:directed="1"/>
      <edge id="81991" label="FLI1 (GRN) NECAB1" source="67437" target="66581" cy:directed="1"/>
      <edge id="81990" label="TP63 (GRN) C22orf15" source="67436" target="67353" cy:directed="1"/>
      <edge id="81989" label="TP63 (GRN) LRRC46" source="67436" target="67310" cy:directed="1"/>
      <edge id="81988" label="TP63 (GRN) TIGD4" source="67436" target="67388" cy:directed="1"/>
      <edge id="81987" label="TP63 (GRN) LRRC23" source="67436" target="67346" cy:directed="1"/>
      <edge id="81986" label="HSFY2 (GRN) RTDR1" source="67435" target="67973" cy:directed="1"/>
      <edge id="81985" label="HSFY2 (GRN) LRRC46" source="67435" target="67310" cy:directed="1"/>
      <edge id="81984" label="HSFY2 (GRN) OTX1" source="67435" target="67390" cy:directed="1"/>
      <edge id="81983" label="HSFY2 (GRN) RABL5" source="67435" target="67395" cy:directed="1"/>
      <edge id="81982" label="EVX2 (GRN) CCDC65" source="67434" target="67934" cy:directed="1"/>
      <edge id="81981" label="EVX2 (GRN) LRRC46" source="67434" target="67310" cy:directed="1"/>
      <edge id="81980" label="EVX2 (GRN) RUVBL2" source="67434" target="67412" cy:directed="1"/>
      <edge id="81979" label="EVX2 (GRN) PAX9" source="67434" target="67382" cy:directed="1"/>
      <edge id="81978" label="EVX2 (GRN) WDR54" source="67434" target="67367" cy:directed="1"/>
      <edge id="81977" label="EVX2 (GRN) FANK1" source="67434" target="67361" cy:directed="1"/>
      <edge id="81976" label="EVX2 (GRN) LRRC23" source="67434" target="67346" cy:directed="1"/>
      <edge id="81975" label="YY1 (GRN) USP18" source="67433" target="67594" cy:directed="1"/>
      <edge id="81974" label="YY1 (GRN) CCDC97" source="67433" target="67584" cy:directed="1"/>
      <edge id="81973" label="YY1 (GRN) CHAMP1" source="67433" target="67575" cy:directed="1"/>
      <edge id="81972" label="YY1 (GRN) RABIF" source="67433" target="67000" cy:directed="1"/>
      <edge id="81971" label="YY1 (GRN) FZD8" source="67433" target="67519" cy:directed="1"/>
      <edge id="81970" label="YY1 (GRN) FBXO27" source="67433" target="67513" cy:directed="1"/>
      <edge id="81969" label="YY1 (GRN) QDPR" source="67433" target="67488" cy:directed="1"/>
      <edge id="81968" label="YY1 (GRN) CORO1A" source="67433" target="66922" cy:directed="1"/>
      <edge id="81967" label="YY1 (GRN) LYL1" source="67433" target="66612" cy:directed="1"/>
      <edge id="81966" label="YY1 (GRN) ALPL" source="67433" target="67136" cy:directed="1"/>
      <edge id="81965" label="YY1 (GRN) EPDR1" source="67433" target="66466" cy:directed="1"/>
      <edge id="81964" label="YY1 (GRN) NUDT19" source="67433" target="66805" cy:directed="1"/>
      <edge id="81963" label="YY1 (GRN) S1PR4" source="67433" target="66499" cy:directed="1"/>
      <edge id="81962" label="YY1 (GRN) DTYMK" source="67433" target="66977" cy:directed="1"/>
      <edge id="81961" label="YY1 (GRN) TMEM41A" source="67433" target="66511" cy:directed="1"/>
      <edge id="81960" label="YY1 (GRN) SYT15" source="67433" target="66459" cy:directed="1"/>
      <edge id="81959" label="E2F5 (GRN) CDKL2" source="67432" target="67482" cy:directed="1"/>
      <edge id="81958" label="E2F5 (GRN) POLR2C" source="67432" target="66527" cy:directed="1"/>
      <edge id="81957" label="E2F5 (GRN) PARN" source="67432" target="67495" cy:directed="1"/>
      <edge id="81956" label="E2F5 (GRN) NECAB1" source="67432" target="66581" cy:directed="1"/>
      <edge id="81955" label="E2F5 (GRN) SNX25" source="67432" target="66437" cy:directed="1"/>
      <edge id="81954" label="E2F5 (GRN) LRRK2" source="67432" target="66454" cy:directed="1"/>
      <edge id="81953" label="TFE3 (GRN) SNX25" source="67431" target="66437" cy:directed="1"/>
      <edge id="81952" label="TFE3 (GRN) MIS18A" source="67431" target="66480" cy:directed="1"/>
      <edge id="81951" label="TFE3 (GRN) EMC3" source="67431" target="67303" cy:directed="1"/>
      <edge id="81950" label="TFE3 (GRN) NDUFAF1" source="67431" target="67083" cy:directed="1"/>
      <edge id="81949" label="TFE3 (GRN) FICD" source="67431" target="66894" cy:directed="1"/>
      <edge id="81948" label="TFE3 (GRN) C9orf64" source="67431" target="67706" cy:directed="1"/>
      <edge id="81947" label="TFE3 (GRN) PCCB" source="67431" target="66759" cy:directed="1"/>
      <edge id="81946" label="TFE3 (GRN) PXMP4" source="67431" target="66857" cy:directed="1"/>
      <edge id="81945" label="TFE3 (GRN) LYRM2" source="67431" target="66457" cy:directed="1"/>
      <edge id="81944" label="TFE3 (GRN) FITM2" source="67431" target="66453" cy:directed="1"/>
      <edge id="81943" label="TFE3 (GRN) MRPL3" source="67431" target="66465" cy:directed="1"/>
      <edge id="81942" label="TFE3 (GRN) TFB2M" source="67431" target="66456" cy:directed="1"/>
      <edge id="81941" label="NFYB (GRN) PABPC1L" source="67430" target="67483" cy:directed="1"/>
      <edge id="81940" label="NFYB (GRN) CAPN3" source="67430" target="66524" cy:directed="1"/>
      <edge id="81939" label="NFYC (GRN) ALPL" source="67429" target="67136" cy:directed="1"/>
      <edge id="81938" label="NFYC (GRN) DIEXF" source="67429" target="66584" cy:directed="1"/>
      <edge id="81937" label="GBX1 (GRN) C17orf72" source="67428" target="67387" cy:directed="1"/>
      <edge id="81936" label="GBX1 (GRN) C9orf116" source="67428" target="67938" cy:directed="1"/>
      <edge id="81935" label="GBX1 (GRN) LRRC46" source="67428" target="67310" cy:directed="1"/>
      <edge id="81934" label="GBX1 (GRN) C9orf117" source="67428" target="67364" cy:directed="1"/>
      <edge id="81933" label="GBX1 (GRN) SIX4" source="67428" target="67406" cy:directed="1"/>
      <edge id="81932" label="GBX1 (GRN) AK8" source="67428" target="67311" cy:directed="1"/>
      <edge id="81931" label="TBX4 (GRN) SMAD6" source="67427" target="67496" cy:directed="1"/>
      <edge id="81930" label="TBX4 (GRN) ZNF696" source="67427" target="66848" cy:directed="1"/>
      <edge id="81929" label="DBP (GRN) SPEF1" source="67426" target="67345" cy:directed="1"/>
      <edge id="81928" label="DBP (GRN) OTX1" source="67426" target="67390" cy:directed="1"/>
      <edge id="81927" label="TFEC (GRN) MBIP" source="67425" target="67196" cy:directed="1"/>
      <edge id="81926" label="TFEC (GRN) SNX30" source="67425" target="66853" cy:directed="1"/>
      <edge id="81925" label="SP4 (GRN) DIEXF" source="67424" target="66584" cy:directed="1"/>
      <edge id="81924" label="SP4 (GRN) RABIF" source="67424" target="67000" cy:directed="1"/>
      <edge id="81923" label="SP4 (GRN) MACROD2" source="67424" target="66598" cy:directed="1"/>
      <edge id="81922" label="SP4 (GRN) MRPL3" source="67424" target="66465" cy:directed="1"/>
      <edge id="81921" label="SP4 (GRN) S1PR4" source="67424" target="66499" cy:directed="1"/>
      <edge id="81920" label="SP4 (GRN) CPSF3" source="67424" target="66575" cy:directed="1"/>
      <edge id="81919" label="SP4 (GRN) LYRM2" source="67424" target="66457" cy:directed="1"/>
      <edge id="81918" label="HEYL (GRN) CDKL2" source="67423" target="67482" cy:directed="1"/>
      <edge id="81917" label="HEYL (GRN) PARN" source="67423" target="67495" cy:directed="1"/>
      <edge id="81916" label="HEYL (GRN) NECAB1" source="67423" target="66581" cy:directed="1"/>
      <edge id="81915" label="HEYL (GRN) SNX25" source="67423" target="66437" cy:directed="1"/>
      <edge id="81914" label="HEYL (GRN) LRRK2" source="67423" target="66454" cy:directed="1"/>
      <edge id="81913" label="RFX5 (GRN) C11orf70" source="67422" target="67887" cy:directed="1"/>
      <edge id="81912" label="RFX5 (GRN) RTDR1" source="67422" target="67973" cy:directed="1"/>
      <edge id="81911" label="RFX5 (GRN) TMEM232" source="67422" target="67972" cy:directed="1"/>
      <edge id="81910" label="RFX5 (GRN) IQCC" source="67422" target="67971" cy:directed="1"/>
      <edge id="81909" label="RFX5 (GRN) CCDC74B" source="67422" target="67970" cy:directed="1"/>
      <edge id="81908" label="RFX5 (GRN) SLC27A2" source="67422" target="67969" cy:directed="1"/>
      <edge id="81907" label="RFX5 (GRN) CD164L2" source="67422" target="67936" cy:directed="1"/>
      <edge id="81906" label="RFX5 (GRN) UBXN10" source="67422" target="67967" cy:directed="1"/>
      <edge id="81905" label="RFX5 (GRN) OSCP1" source="67422" target="67966" cy:directed="1"/>
      <edge id="81904" label="RFX5 (GRN) CCDC24" source="67422" target="67411" cy:directed="1"/>
      <edge id="81903" label="RFX5 (GRN) AK7" source="67422" target="67965" cy:directed="1"/>
      <edge id="81902" label="RFX5 (GRN) ZMYND12" source="67422" target="67964" cy:directed="1"/>
      <edge id="81901" label="RFX5 (GRN) ACSBG1" source="67422" target="67963" cy:directed="1"/>
      <edge id="81900" label="RFX5 (GRN) GYG2" source="67422" target="67880" cy:directed="1"/>
      <edge id="81899" label="RFX5 (GRN) KIF9" source="67422" target="67962" cy:directed="1"/>
      <edge id="81898" label="RFX5 (GRN) ANKRD54" source="67422" target="67909" cy:directed="1"/>
      <edge id="81897" label="RFX5 (GRN) SLC44A4" source="67422" target="67413" cy:directed="1"/>
      <edge id="81896" label="RFX5 (GRN) DTHD1" source="67422" target="67961" cy:directed="1"/>
      <edge id="81895" label="RFX5 (GRN) C16orf71" source="67422" target="67960" cy:directed="1"/>
      <edge id="81894" label="RFX5 (GRN) HN1L" source="67422" target="67512" cy:directed="1"/>
      <edge id="81893" label="RFX5 (GRN) IQUB" source="67422" target="67959" cy:directed="1"/>
      <edge id="81892" label="RFX5 (GRN) SPA17" source="67422" target="67410" cy:directed="1"/>
      <edge id="81891" label="RFX5 (GRN) CCDC113" source="67422" target="67954" cy:directed="1"/>
      <edge id="81890" label="RFX5 (GRN) RPGRIP1L" source="67422" target="67953" cy:directed="1"/>
      <edge id="81889" label="RFX5 (GRN) TTC18" source="67422" target="67952" cy:directed="1"/>
      <edge id="81888" label="RFX5 (GRN) PRR15" source="67422" target="67951" cy:directed="1"/>
      <edge id="81887" label="RFX5 (GRN) ZNF474" source="67422" target="67950" cy:directed="1"/>
      <edge id="81886" label="RFX5 (GRN) ENKUR" source="67422" target="67949" cy:directed="1"/>
      <edge id="81885" label="RFX5 (GRN) ZNF273" source="67422" target="67948" cy:directed="1"/>
      <edge id="81884" label="RFX5 (GRN) C9orf9" source="67422" target="67947" cy:directed="1"/>
      <edge id="81883" label="RFX5 (GRN) CCDC153" source="67422" target="67946" cy:directed="1"/>
      <edge id="81882" label="RFX5 (GRN) TTC23L" source="67422" target="67945" cy:directed="1"/>
      <edge id="81881" label="RFX5 (GRN) MAT1A" source="67422" target="67944" cy:directed="1"/>
      <edge id="81880" label="RFX5 (GRN) EFCAB10" source="67422" target="67943" cy:directed="1"/>
      <edge id="81879" label="RFX5 (GRN) ARX" source="67422" target="67942" cy:directed="1"/>
      <edge id="81878" label="RFX5 (GRN) C16orf93" source="67422" target="67941" cy:directed="1"/>
      <edge id="81877" label="RFX5 (GRN) CCDC170" source="67422" target="67940" cy:directed="1"/>
      <edge id="81876" label="RFX5 (GRN) TMEM231" source="67422" target="67939" cy:directed="1"/>
      <edge id="81875" label="RFX5 (GRN) RABL2B" source="67422" target="67908" cy:directed="1"/>
      <edge id="81874" label="RFX5 (GRN) C9orf116" source="67422" target="67938" cy:directed="1"/>
      <edge id="81873" label="RFX5 (GRN) RSPH9" source="67422" target="67937" cy:directed="1"/>
      <edge id="81872" label="RFX5 (GRN) NEK5" source="67422" target="67935" cy:directed="1"/>
      <edge id="81871" label="RFX5 (GRN) CCDC65" source="67422" target="67934" cy:directed="1"/>
      <edge id="81870" label="RFX5 (GRN) ESPN" source="67422" target="67933" cy:directed="1"/>
      <edge id="81869" label="RFX5 (GRN) DRC1" source="67422" target="67932" cy:directed="1"/>
      <edge id="81868" label="RFX5 (GRN) MOK" source="67422" target="67931" cy:directed="1"/>
      <edge id="81867" label="RFX5 (GRN) KIF24" source="67422" target="67930" cy:directed="1"/>
      <edge id="81866" label="RFX5 (GRN) C8orf47" source="67422" target="67929" cy:directed="1"/>
      <edge id="81865" label="RFX5 (GRN) C9orf24" source="67422" target="67928" cy:directed="1"/>
      <edge id="81864" label="RFX5 (GRN) EFCAB12" source="67422" target="67927" cy:directed="1"/>
      <edge id="81863" label="RFX5 (GRN) SPATA18" source="67422" target="67926" cy:directed="1"/>
      <edge id="81862" label="RFX5 (GRN) MDH1B" source="67422" target="67370" cy:directed="1"/>
      <edge id="81861" label="RFX5 (GRN) CP" source="67422" target="67403" cy:directed="1"/>
      <edge id="81860" label="RFX5 (GRN) DZIP1L" source="67422" target="67402" cy:directed="1"/>
      <edge id="81859" label="RFX5 (GRN) FAM227A" source="67422" target="67400" cy:directed="1"/>
      <edge id="81858" label="RFX5 (GRN) CCDC13" source="67422" target="67399" cy:directed="1"/>
      <edge id="81857" label="RFX5 (GRN) ROPN1L" source="67422" target="67349" cy:directed="1"/>
      <edge id="81856" label="RFX5 (GRN) E2F8" source="67422" target="67397" cy:directed="1"/>
      <edge id="81855" label="RFX5 (GRN) HMGB3" source="67422" target="67240" cy:directed="1"/>
      <edge id="81854" label="RFX5 (GRN) CCDC151" source="67422" target="67376" cy:directed="1"/>
      <edge id="81853" label="RFX5 (GRN) NGEF" source="67422" target="67396" cy:directed="1"/>
      <edge id="81852" label="RFX5 (GRN) RABL5" source="67422" target="67395" cy:directed="1"/>
      <edge id="81851" label="RFX5 (GRN) SRCIN1" source="67422" target="67394" cy:directed="1"/>
      <edge id="81850" label="RFX5 (GRN) CCDC74A" source="67422" target="67392" cy:directed="1"/>
      <edge id="81849" label="RFX5 (GRN) IFT46" source="67422" target="67391" cy:directed="1"/>
      <edge id="81848" label="RFX5 (GRN) FAM166B" source="67422" target="67362" cy:directed="1"/>
      <edge id="81847" label="RFX5 (GRN) TRIP13" source="67422" target="66606" cy:directed="1"/>
      <edge id="81846" label="RFX5 (GRN) WDR96" source="67422" target="67371" cy:directed="1"/>
      <edge id="81845" label="RFX5 (GRN) DNALI1" source="67422" target="67312" cy:directed="1"/>
      <edge id="81844" label="RFX5 (GRN) OTX1" source="67422" target="67390" cy:directed="1"/>
      <edge id="81843" label="RFX5 (GRN) TIGD4" source="67422" target="67388" cy:directed="1"/>
      <edge id="81842" label="RFX5 (GRN) C17orf72" source="67422" target="67387" cy:directed="1"/>
      <edge id="81841" label="RFX5 (GRN) AK8" source="67422" target="67311" cy:directed="1"/>
      <edge id="81840" label="RFX5 (GRN) DNAAF1" source="67422" target="67386" cy:directed="1"/>
      <edge id="81839" label="RFX5 (GRN) DENND6B" source="67422" target="67385" cy:directed="1"/>
      <edge id="81838" label="RFX5 (GRN) TSNAXIP1" source="67422" target="67384" cy:directed="1"/>
      <edge id="81837" label="RFX5 (GRN) PAX9" source="67422" target="67382" cy:directed="1"/>
      <edge id="81836" label="RFX5 (GRN) PPP1R32" source="67422" target="67381" cy:directed="1"/>
      <edge id="81835" label="RFX5 (GRN) RAB36" source="67422" target="67380" cy:directed="1"/>
      <edge id="81834" label="RFX5 (GRN) RIBC1" source="67422" target="67379" cy:directed="1"/>
      <edge id="81833" label="RFX5 (GRN) ADGB" source="67422" target="67378" cy:directed="1"/>
      <edge id="81832" label="RFX5 (GRN) WDR16" source="67422" target="67377" cy:directed="1"/>
      <edge id="81831" label="RFX5 (GRN) LRRC46" source="67422" target="67310" cy:directed="1"/>
      <edge id="81830" label="RFX5 (GRN) FAM154B" source="67422" target="67375" cy:directed="1"/>
      <edge id="81829" label="RFX5 (GRN) SIX1" source="67422" target="67374" cy:directed="1"/>
      <edge id="81828" label="RFX5 (GRN) CCDC114" source="67422" target="67373" cy:directed="1"/>
      <edge id="81827" label="RFX5 (GRN) FHAD1" source="67422" target="67372" cy:directed="1"/>
      <edge id="81826" label="RFX5 (GRN) PPAP2C" source="67422" target="67368" cy:directed="1"/>
      <edge id="81825" label="RFX5 (GRN) WDR54" source="67422" target="67367" cy:directed="1"/>
      <edge id="81824" label="RFX5 (GRN) NPHP1" source="67422" target="67366" cy:directed="1"/>
      <edge id="81823" label="RFX5 (GRN) GRIN3B" source="67422" target="67365" cy:directed="1"/>
      <edge id="81822" label="RFX5 (GRN) C9orf117" source="67422" target="67364" cy:directed="1"/>
      <edge id="81821" label="RFX5 (GRN) DNAH10" source="67422" target="67363" cy:directed="1"/>
      <edge id="81820" label="RFX5 (GRN) FANK1" source="67422" target="67361" cy:directed="1"/>
      <edge id="81819" label="RFX5 (GRN) C4orf47" source="67422" target="67360" cy:directed="1"/>
      <edge id="81818" label="RFX5 (GRN) ARHGAP39" source="67422" target="67359" cy:directed="1"/>
      <edge id="81817" label="RFX5 (GRN) PPIL6" source="67422" target="67358" cy:directed="1"/>
      <edge id="81816" label="RFX5 (GRN) C3orf67" source="67422" target="67357" cy:directed="1"/>
      <edge id="81815" label="RFX5 (GRN) SPAG8" source="67422" target="67356" cy:directed="1"/>
      <edge id="81814" label="RFX5 (GRN) KLHL32" source="67422" target="67355" cy:directed="1"/>
      <edge id="81813" label="RFX5 (GRN) CCDC180" source="67422" target="67354" cy:directed="1"/>
      <edge id="81812" label="RFX5 (GRN) C22orf15" source="67422" target="67353" cy:directed="1"/>
      <edge id="81811" label="RFX5 (GRN) PIH1D2" source="67422" target="67309" cy:directed="1"/>
      <edge id="81810" label="RFX5 (GRN) CETN2" source="67422" target="67352" cy:directed="1"/>
      <edge id="81809" label="RFX5 (GRN) MAK" source="67422" target="67351" cy:directed="1"/>
      <edge id="81808" label="RFX5 (GRN) CDHR3" source="67422" target="67350" cy:directed="1"/>
      <edge id="81807" label="RFX5 (GRN) TSPAN1" source="67422" target="67348" cy:directed="1"/>
      <edge id="81806" label="RFX5 (GRN) CCNO" source="67422" target="67347" cy:directed="1"/>
      <edge id="81805" label="RFX5 (GRN) C1orf192" source="67422" target="67308" cy:directed="1"/>
      <edge id="81804" label="RFX5 (GRN) LRRC23" source="67422" target="67346" cy:directed="1"/>
      <edge id="81803" label="RFX5 (GRN) LRRC48" source="67422" target="67307" cy:directed="1"/>
      <edge id="81802" label="RFX5 (GRN) SPEF1" source="67422" target="67345" cy:directed="1"/>
      <edge id="81801" label="RFX5 (GRN) ZMYND10" source="67422" target="67344" cy:directed="1"/>
      <edge id="81800" label="RFX5 (GRN) WDR66" source="67422" target="67343" cy:directed="1"/>
      <edge id="81799" label="RFX5 (GRN) TP73" source="67422" target="67342" cy:directed="1"/>
      <edge id="81798" label="RFX3 (GRN) CYP2J2" source="67421" target="67982" cy:directed="1"/>
      <edge id="81797" label="RFX3 (GRN) TMEM254" source="67421" target="67883" cy:directed="1"/>
      <edge id="81796" label="RFX3 (GRN) NEK10" source="67421" target="67974" cy:directed="1"/>
      <edge id="81795" label="RFX3 (GRN) HSPB11" source="67421" target="67981" cy:directed="1"/>
      <edge id="81794" label="RFX3 (GRN) RTDR1" source="67421" target="67973" cy:directed="1"/>
      <edge id="81793" label="RFX3 (GRN) DYX1C1" source="67421" target="66654" cy:directed="1"/>
      <edge id="81792" label="RFX3 (GRN) SYT8" source="67421" target="67980" cy:directed="1"/>
      <edge id="81791" label="RFX3 (GRN) TMEM232" source="67421" target="67972" cy:directed="1"/>
      <edge id="81790" label="RFX3 (GRN) IQCC" source="67421" target="67971" cy:directed="1"/>
      <edge id="81789" label="RFX3 (GRN) CCDC74B" source="67421" target="67970" cy:directed="1"/>
      <edge id="81788" label="RFX3 (GRN) SLC27A2" source="67421" target="67969" cy:directed="1"/>
      <edge id="81787" label="RFX3 (GRN) SNX25" source="67421" target="66437" cy:directed="1"/>
      <edge id="81786" label="RFX3 (GRN) C11orf70" source="67421" target="67887" cy:directed="1"/>
      <edge id="81785" label="RFX3 (GRN) EFCAB11" source="67421" target="67968" cy:directed="1"/>
      <edge id="81784" label="RFX3 (GRN) UBXN10" source="67421" target="67967" cy:directed="1"/>
      <edge id="81783" label="RFX3 (GRN) LPAR3" source="67421" target="67986" cy:directed="1"/>
      <edge id="81782" label="RFX3 (GRN) OSCP1" source="67421" target="67966" cy:directed="1"/>
      <edge id="81781" label="RFX3 (GRN) AK7" source="67421" target="67965" cy:directed="1"/>
      <edge id="81780" label="RFX3 (GRN) ZMYND12" source="67421" target="67964" cy:directed="1"/>
      <edge id="81779" label="RFX3 (GRN) ACSBG1" source="67421" target="67963" cy:directed="1"/>
      <edge id="81778" label="RFX3 (GRN) GYG2" source="67421" target="67880" cy:directed="1"/>
      <edge id="81777" label="RFX3 (GRN) CCDC176" source="67421" target="67979" cy:directed="1"/>
      <edge id="81776" label="RFX3 (GRN) KIF9" source="67421" target="67962" cy:directed="1"/>
      <edge id="81775" label="RFX3 (GRN) ANKRD54" source="67421" target="67909" cy:directed="1"/>
      <edge id="81774" label="RFX3 (GRN) IDH2" source="67421" target="67135" cy:directed="1"/>
      <edge id="81773" label="RFX3 (GRN) GLB1L2" source="67421" target="67978" cy:directed="1"/>
      <edge id="81772" label="RFX3 (GRN) DTHD1" source="67421" target="67961" cy:directed="1"/>
      <edge id="81771" label="RFX3 (GRN) C16orf71" source="67421" target="67960" cy:directed="1"/>
      <edge id="81770" label="RFX3 (GRN) HN1L" source="67421" target="67512" cy:directed="1"/>
      <edge id="81769" label="RFX3 (GRN) IQUB" source="67421" target="67959" cy:directed="1"/>
      <edge id="81768" label="RFX3 (GRN) DYNC2H1" source="67421" target="67977" cy:directed="1"/>
      <edge id="81767" label="RFX3 (GRN) PACRG" source="67421" target="67957" cy:directed="1"/>
      <edge id="81766" label="RFX3 (GRN) C20orf26" source="67421" target="67955" cy:directed="1"/>
      <edge id="81765" label="RFX3 (GRN) CCDC113" source="67421" target="67954" cy:directed="1"/>
      <edge id="81764" label="RFX3 (GRN) RPGRIP1L" source="67421" target="67953" cy:directed="1"/>
      <edge id="81763" label="RFX3 (GRN) TTC18" source="67421" target="67952" cy:directed="1"/>
      <edge id="81762" label="RFX3 (GRN) PRR15" source="67421" target="67951" cy:directed="1"/>
      <edge id="81761" label="RFX3 (GRN) ZNF474" source="67421" target="67950" cy:directed="1"/>
      <edge id="81760" label="RFX3 (GRN) ENKUR" source="67421" target="67949" cy:directed="1"/>
      <edge id="81759" label="RFX3 (GRN) ZNF273" source="67421" target="67948" cy:directed="1"/>
      <edge id="81758" label="RFX3 (GRN) C9orf9" source="67421" target="67947" cy:directed="1"/>
      <edge id="81757" label="RFX3 (GRN) CCDC153" source="67421" target="67946" cy:directed="1"/>
      <edge id="81756" label="RFX3 (GRN) TTC23L" source="67421" target="67945" cy:directed="1"/>
      <edge id="81755" label="RFX3 (GRN) MAT1A" source="67421" target="67944" cy:directed="1"/>
      <edge id="81754" label="RFX3 (GRN) EFCAB10" source="67421" target="67943" cy:directed="1"/>
      <edge id="81753" label="RFX3 (GRN) ARX" source="67421" target="67942" cy:directed="1"/>
      <edge id="81752" label="RFX3 (GRN) C16orf93" source="67421" target="67941" cy:directed="1"/>
      <edge id="81751" label="RFX3 (GRN) CCDC170" source="67421" target="67940" cy:directed="1"/>
      <edge id="81750" label="RFX3 (GRN) TMEM231" source="67421" target="67939" cy:directed="1"/>
      <edge id="81749" label="RFX3 (GRN) RABL2B" source="67421" target="67908" cy:directed="1"/>
      <edge id="81748" label="RFX3 (GRN) C9orf116" source="67421" target="67938" cy:directed="1"/>
      <edge id="81747" label="RFX3 (GRN) RSPH9" source="67421" target="67937" cy:directed="1"/>
      <edge id="81746" label="RFX3 (GRN) CD164L2" source="67421" target="67936" cy:directed="1"/>
      <edge id="81745" label="RFX3 (GRN) NEK5" source="67421" target="67935" cy:directed="1"/>
      <edge id="81744" label="RFX3 (GRN) CCDC65" source="67421" target="67934" cy:directed="1"/>
      <edge id="81743" label="RFX3 (GRN) ESPN" source="67421" target="67933" cy:directed="1"/>
      <edge id="81742" label="RFX3 (GRN) DRC1" source="67421" target="67932" cy:directed="1"/>
      <edge id="81741" label="RFX3 (GRN) MOK" source="67421" target="67931" cy:directed="1"/>
      <edge id="81740" label="RFX3 (GRN) KIF24" source="67421" target="67930" cy:directed="1"/>
      <edge id="81739" label="RFX3 (GRN) C8orf47" source="67421" target="67929" cy:directed="1"/>
      <edge id="81738" label="RFX3 (GRN) C9orf24" source="67421" target="67928" cy:directed="1"/>
      <edge id="81737" label="RFX3 (GRN) EFCAB12" source="67421" target="67927" cy:directed="1"/>
      <edge id="81736" label="RFX3 (GRN) SPATA18" source="67421" target="67926" cy:directed="1"/>
      <edge id="81735" label="RFX3 (GRN) CP" source="67421" target="67403" cy:directed="1"/>
      <edge id="81734" label="RFX3 (GRN) TTC30B" source="67421" target="67415" cy:directed="1"/>
      <edge id="81733" label="RFX3 (GRN) ST6GALNAC1" source="67421" target="67414" cy:directed="1"/>
      <edge id="81732" label="RFX3 (GRN) SLC44A4" source="67421" target="67413" cy:directed="1"/>
      <edge id="81731" label="RFX3 (GRN) DZIP1L" source="67421" target="67402" cy:directed="1"/>
      <edge id="81730" label="RFX3 (GRN) EPN3" source="67421" target="67401" cy:directed="1"/>
      <edge id="81729" label="RFX3 (GRN) RUVBL2" source="67421" target="67412" cy:directed="1"/>
      <edge id="81728" label="RFX3 (GRN) CCDC24" source="67421" target="67411" cy:directed="1"/>
      <edge id="81727" label="RFX3 (GRN) STEAP3" source="67421" target="67202" cy:directed="1"/>
      <edge id="81726" label="RFX3 (GRN) FAM227A" source="67421" target="67400" cy:directed="1"/>
      <edge id="81725" label="RFX3 (GRN) IRX2" source="67421" target="66694" cy:directed="1"/>
      <edge id="81724" label="RFX3 (GRN) SPTBN2" source="67421" target="67408" cy:directed="1"/>
      <edge id="81723" label="RFX3 (GRN) CCDC13" source="67421" target="67399" cy:directed="1"/>
      <edge id="81722" label="RFX3 (GRN) SLC52A1" source="67421" target="67398" cy:directed="1"/>
      <edge id="81721" label="RFX3 (GRN) E2F8" source="67421" target="67397" cy:directed="1"/>
      <edge id="81720" label="RFX3 (GRN) SPA17" source="67421" target="67410" cy:directed="1"/>
      <edge id="81719" label="RFX3 (GRN) IGSF9" source="67421" target="67409" cy:directed="1"/>
      <edge id="81718" label="RFX3 (GRN) HMGB3" source="67421" target="67240" cy:directed="1"/>
      <edge id="81717" label="RFX3 (GRN) NGEF" source="67421" target="67396" cy:directed="1"/>
      <edge id="81716" label="RFX3 (GRN) RABL5" source="67421" target="67395" cy:directed="1"/>
      <edge id="81715" label="RFX3 (GRN) SRCIN1" source="67421" target="67394" cy:directed="1"/>
      <edge id="81714" label="RFX3 (GRN) IFT46" source="67421" target="67391" cy:directed="1"/>
      <edge id="81713" label="RFX3 (GRN) FBXW9" source="67421" target="67407" cy:directed="1"/>
      <edge id="81712" label="RFX3 (GRN) TRIP13" source="67421" target="66606" cy:directed="1"/>
      <edge id="81711" label="RFX3 (GRN) DNALI1" source="67421" target="67312" cy:directed="1"/>
      <edge id="81710" label="RFX3 (GRN) OTX1" source="67421" target="67390" cy:directed="1"/>
      <edge id="81709" label="RFX3 (GRN) TCTEX1D1" source="67421" target="67389" cy:directed="1"/>
      <edge id="81708" label="RFX3 (GRN) TIGD4" source="67421" target="67388" cy:directed="1"/>
      <edge id="81707" label="RFX3 (GRN) C17orf72" source="67421" target="67387" cy:directed="1"/>
      <edge id="81706" label="RFX3 (GRN) AK8" source="67421" target="67311" cy:directed="1"/>
      <edge id="81705" label="RFX3 (GRN) DNAAF1" source="67421" target="67386" cy:directed="1"/>
      <edge id="81704" label="RFX3 (GRN) DENND6B" source="67421" target="67385" cy:directed="1"/>
      <edge id="81703" label="RFX3 (GRN) IRF6" source="67421" target="67383" cy:directed="1"/>
      <edge id="81702" label="RFX3 (GRN) PAX9" source="67421" target="67382" cy:directed="1"/>
      <edge id="81701" label="RFX3 (GRN) TSNAXIP1" source="67421" target="67384" cy:directed="1"/>
      <edge id="81700" label="RFX3 (GRN) PPP1R32" source="67421" target="67381" cy:directed="1"/>
      <edge id="81699" label="RFX3 (GRN) SIX4" source="67421" target="67406" cy:directed="1"/>
      <edge id="81698" label="RFX3 (GRN) RAB36" source="67421" target="67380" cy:directed="1"/>
      <edge id="81697" label="RFX3 (GRN) CCDC74A" source="67421" target="67392" cy:directed="1"/>
      <edge id="81696" label="RFX3 (GRN) C10orf95" source="67421" target="67405" cy:directed="1"/>
      <edge id="81695" label="RFX3 (GRN) RIBC1" source="67421" target="67379" cy:directed="1"/>
      <edge id="81694" label="RFX3 (GRN) ADGB" source="67421" target="67378" cy:directed="1"/>
      <edge id="81693" label="RFX3 (GRN) WDR16" source="67421" target="67377" cy:directed="1"/>
      <edge id="81692" label="RFX3 (GRN) CCDC151" source="67421" target="67376" cy:directed="1"/>
      <edge id="81691" label="RFX3 (GRN) LRRC46" source="67421" target="67310" cy:directed="1"/>
      <edge id="81690" label="RFX3 (GRN) FAM154B" source="67421" target="67375" cy:directed="1"/>
      <edge id="81689" label="RFX3 (GRN) SIX1" source="67421" target="67374" cy:directed="1"/>
      <edge id="81688" label="RFX3 (GRN) CCDC114" source="67421" target="67373" cy:directed="1"/>
      <edge id="81687" label="RFX3 (GRN) FHAD1" source="67421" target="67372" cy:directed="1"/>
      <edge id="81686" label="RFX3 (GRN) WDR96" source="67421" target="67371" cy:directed="1"/>
      <edge id="81685" label="RFX3 (GRN) MDH1B" source="67421" target="67370" cy:directed="1"/>
      <edge id="81684" label="RFX3 (GRN) RHOV" source="67421" target="67369" cy:directed="1"/>
      <edge id="81683" label="RFX3 (GRN) PPAP2C" source="67421" target="67368" cy:directed="1"/>
      <edge id="81682" label="RFX3 (GRN) WDR54" source="67421" target="67367" cy:directed="1"/>
      <edge id="81681" label="RFX3 (GRN) NPHP1" source="67421" target="67366" cy:directed="1"/>
      <edge id="81680" label="RFX3 (GRN) GRIN3B" source="67421" target="67365" cy:directed="1"/>
      <edge id="81679" label="RFX3 (GRN) C9orf117" source="67421" target="67364" cy:directed="1"/>
      <edge id="81678" label="RFX3 (GRN) DNAH10" source="67421" target="67363" cy:directed="1"/>
      <edge id="81677" label="RFX3 (GRN) FAM166B" source="67421" target="67362" cy:directed="1"/>
      <edge id="81676" label="RFX3 (GRN) FANK1" source="67421" target="67361" cy:directed="1"/>
      <edge id="81675" label="RFX3 (GRN) C4orf47" source="67421" target="67360" cy:directed="1"/>
      <edge id="81674" label="RFX3 (GRN) ARHGAP39" source="67421" target="67359" cy:directed="1"/>
      <edge id="81673" label="RFX3 (GRN) PPIL6" source="67421" target="67358" cy:directed="1"/>
      <edge id="81672" label="RFX3 (GRN) C3orf67" source="67421" target="67357" cy:directed="1"/>
      <edge id="81671" label="RFX3 (GRN) SPAG8" source="67421" target="67356" cy:directed="1"/>
      <edge id="81670" label="RFX3 (GRN) KLHL32" source="67421" target="67355" cy:directed="1"/>
      <edge id="81669" label="RFX3 (GRN) CCDC180" source="67421" target="67354" cy:directed="1"/>
      <edge id="81668" label="RFX3 (GRN) C22orf15" source="67421" target="67353" cy:directed="1"/>
      <edge id="81667" label="RFX3 (GRN) PIH1D2" source="67421" target="67309" cy:directed="1"/>
      <edge id="81666" label="RFX3 (GRN) CETN2" source="67421" target="67352" cy:directed="1"/>
      <edge id="81665" label="RFX3 (GRN) MAK" source="67421" target="67351" cy:directed="1"/>
      <edge id="81664" label="RFX3 (GRN) CDHR3" source="67421" target="67350" cy:directed="1"/>
      <edge id="81663" label="RFX3 (GRN) ROPN1L" source="67421" target="67349" cy:directed="1"/>
      <edge id="81662" label="RFX3 (GRN) TSPAN1" source="67421" target="67348" cy:directed="1"/>
      <edge id="81661" label="RFX3 (GRN) CCNO" source="67421" target="67347" cy:directed="1"/>
      <edge id="81660" label="RFX3 (GRN) C1orf192" source="67421" target="67308" cy:directed="1"/>
      <edge id="81659" label="RFX3 (GRN) LRRC23" source="67421" target="67346" cy:directed="1"/>
      <edge id="81658" label="RFX3 (GRN) LRRC48" source="67421" target="67307" cy:directed="1"/>
      <edge id="81657" label="RFX3 (GRN) SPEF1" source="67421" target="67345" cy:directed="1"/>
      <edge id="81656" label="RFX3 (GRN) ZMYND10" source="67421" target="67344" cy:directed="1"/>
      <edge id="81655" label="RFX3 (GRN) WDR66" source="67421" target="67343" cy:directed="1"/>
      <edge id="81654" label="RFX3 (GRN) TP73" source="67421" target="67342" cy:directed="1"/>
      <edge id="81653" label="ARID2 (GRN) C11orf70" source="67420" target="67887" cy:directed="1"/>
      <edge id="81652" label="ARID2 (GRN) RTDR1" source="67420" target="67973" cy:directed="1"/>
      <edge id="81651" label="ARID2 (GRN) IQCC" source="67420" target="67971" cy:directed="1"/>
      <edge id="81650" label="ARID2 (GRN) SLC27A2" source="67420" target="67969" cy:directed="1"/>
      <edge id="81649" label="ARID2 (GRN) OSCP1" source="67420" target="67966" cy:directed="1"/>
      <edge id="81648" label="ARID2 (GRN) CCDC24" source="67420" target="67411" cy:directed="1"/>
      <edge id="81647" label="ARID2 (GRN) AK7" source="67420" target="67965" cy:directed="1"/>
      <edge id="81646" label="ARID2 (GRN) ZMYND12" source="67420" target="67964" cy:directed="1"/>
      <edge id="81645" label="ARID2 (GRN) ACSBG1" source="67420" target="67963" cy:directed="1"/>
      <edge id="81644" label="ARID2 (GRN) GYG2" source="67420" target="67880" cy:directed="1"/>
      <edge id="81643" label="ARID2 (GRN) KIF9" source="67420" target="67962" cy:directed="1"/>
      <edge id="81642" label="ARID2 (GRN) ANKRD54" source="67420" target="67909" cy:directed="1"/>
      <edge id="81641" label="ARID2 (GRN) SLC44A4" source="67420" target="67413" cy:directed="1"/>
      <edge id="81640" label="ARID2 (GRN) DTHD1" source="67420" target="67961" cy:directed="1"/>
      <edge id="81639" label="ARID2 (GRN) HN1L" source="67420" target="67512" cy:directed="1"/>
      <edge id="81638" label="ARID2 (GRN) IQUB" source="67420" target="67959" cy:directed="1"/>
      <edge id="81637" label="ARID2 (GRN) ZDHHC13" source="67420" target="67958" cy:directed="1"/>
      <edge id="81636" label="ARID2 (GRN) CDH26" source="67420" target="67956" cy:directed="1"/>
      <edge id="81635" label="ARID2 (GRN) CCDC13" source="67420" target="67399" cy:directed="1"/>
      <edge id="81634" label="ARID2 (GRN) SPA17" source="67420" target="67410" cy:directed="1"/>
      <edge id="81633" label="ARID2 (GRN) C20orf26" source="67420" target="67955" cy:directed="1"/>
      <edge id="81632" label="ARID2 (GRN) CCDC113" source="67420" target="67954" cy:directed="1"/>
      <edge id="81631" label="ARID2 (GRN) RPGRIP1L" source="67420" target="67953" cy:directed="1"/>
      <edge id="81630" label="ARID2 (GRN) TTC18" source="67420" target="67952" cy:directed="1"/>
      <edge id="81629" label="ARID2 (GRN) PRR15" source="67420" target="67951" cy:directed="1"/>
      <edge id="81628" label="ARID2 (GRN) ZNF474" source="67420" target="67950" cy:directed="1"/>
      <edge id="81627" label="ARID2 (GRN) ENKUR" source="67420" target="67949" cy:directed="1"/>
      <edge id="81626" label="ARID2 (GRN) C9orf9" source="67420" target="67947" cy:directed="1"/>
      <edge id="81625" label="ARID2 (GRN) CCDC153" source="67420" target="67946" cy:directed="1"/>
      <edge id="81624" label="ARID2 (GRN) TTC23L" source="67420" target="67945" cy:directed="1"/>
      <edge id="81623" label="ARID2 (GRN) EFCAB10" source="67420" target="67943" cy:directed="1"/>
      <edge id="81622" label="ARID2 (GRN) ARX" source="67420" target="67942" cy:directed="1"/>
      <edge id="81621" label="ARID2 (GRN) C16orf93" source="67420" target="67941" cy:directed="1"/>
      <edge id="81620" label="ARID2 (GRN) TIGD4" source="67420" target="67388" cy:directed="1"/>
      <edge id="81619" label="ARID2 (GRN) CCDC170" source="67420" target="67940" cy:directed="1"/>
      <edge id="81618" label="ARID2 (GRN) TMEM231" source="67420" target="67939" cy:directed="1"/>
      <edge id="81617" label="ARID2 (GRN) RABL2B" source="67420" target="67908" cy:directed="1"/>
      <edge id="81616" label="ARID2 (GRN) FAM166B" source="67420" target="67362" cy:directed="1"/>
      <edge id="81615" label="ARID2 (GRN) C9orf116" source="67420" target="67938" cy:directed="1"/>
      <edge id="81614" label="ARID2 (GRN) RSPH9" source="67420" target="67937" cy:directed="1"/>
      <edge id="81613" label="ARID2 (GRN) NEK5" source="67420" target="67935" cy:directed="1"/>
      <edge id="81612" label="ARID2 (GRN) CCDC65" source="67420" target="67934" cy:directed="1"/>
      <edge id="81611" label="ARID2 (GRN) ROPN1L" source="67420" target="67349" cy:directed="1"/>
      <edge id="81610" label="ARID2 (GRN) MOK" source="67420" target="67931" cy:directed="1"/>
      <edge id="81609" label="ARID2 (GRN) KIF24" source="67420" target="67930" cy:directed="1"/>
      <edge id="81608" label="ARID2 (GRN) C9orf24" source="67420" target="67928" cy:directed="1"/>
      <edge id="81607" label="ARID2 (GRN) EFCAB12" source="67420" target="67927" cy:directed="1"/>
      <edge id="81606" label="ARID2 (GRN) SPATA18" source="67420" target="67926" cy:directed="1"/>
      <edge id="81605" label="ARID2 (GRN) CP" source="67420" target="67403" cy:directed="1"/>
      <edge id="81604" label="ARID2 (GRN) C17orf72" source="67420" target="67387" cy:directed="1"/>
      <edge id="81603" label="ARID2 (GRN) FAM227A" source="67420" target="67400" cy:directed="1"/>
      <edge id="81602" label="ARID2 (GRN) E2F8" source="67420" target="67397" cy:directed="1"/>
      <edge id="81601" label="ARID2 (GRN) HMGB3" source="67420" target="67240" cy:directed="1"/>
      <edge id="81600" label="ARID2 (GRN) RABL5" source="67420" target="67395" cy:directed="1"/>
      <edge id="81599" label="ARID2 (GRN) SRCIN1" source="67420" target="67394" cy:directed="1"/>
      <edge id="81598" label="ARID2 (GRN) PVRL4" source="67420" target="67393" cy:directed="1"/>
      <edge id="81597" label="ARID2 (GRN) TRIP13" source="67420" target="66606" cy:directed="1"/>
      <edge id="81596" label="ARID2 (GRN) WDR96" source="67420" target="67371" cy:directed="1"/>
      <edge id="81595" label="ARID2 (GRN) DNALI1" source="67420" target="67312" cy:directed="1"/>
      <edge id="81594" label="ARID2 (GRN) OTX1" source="67420" target="67390" cy:directed="1"/>
      <edge id="81593" label="ARID2 (GRN) AK8" source="67420" target="67311" cy:directed="1"/>
      <edge id="81592" label="ARID2 (GRN) DNAAF1" source="67420" target="67386" cy:directed="1"/>
      <edge id="81591" label="ARID2 (GRN) DENND6B" source="67420" target="67385" cy:directed="1"/>
      <edge id="81590" label="ARID2 (GRN) TSNAXIP1" source="67420" target="67384" cy:directed="1"/>
      <edge id="81589" label="ARID2 (GRN) IRF6" source="67420" target="67383" cy:directed="1"/>
      <edge id="81588" label="ARID2 (GRN) PAX9" source="67420" target="67382" cy:directed="1"/>
      <edge id="81587" label="ARID2 (GRN) PPP1R32" source="67420" target="67381" cy:directed="1"/>
      <edge id="81586" label="ARID2 (GRN) SPAG8" source="67420" target="67356" cy:directed="1"/>
      <edge id="81585" label="ARID2 (GRN) RAB36" source="67420" target="67380" cy:directed="1"/>
      <edge id="81584" label="ARID2 (GRN) RIBC1" source="67420" target="67379" cy:directed="1"/>
      <edge id="81583" label="ARID2 (GRN) ADGB" source="67420" target="67378" cy:directed="1"/>
      <edge id="81582" label="ARID2 (GRN) WDR16" source="67420" target="67377" cy:directed="1"/>
      <edge id="81581" label="ARID2 (GRN) LRRC46" source="67420" target="67310" cy:directed="1"/>
      <edge id="81580" label="ARID2 (GRN) FAM154B" source="67420" target="67375" cy:directed="1"/>
      <edge id="81579" label="ARID2 (GRN) SIX1" source="67420" target="67374" cy:directed="1"/>
      <edge id="81578" label="ARID2 (GRN) CCDC114" source="67420" target="67373" cy:directed="1"/>
      <edge id="81577" label="ARID2 (GRN) FHAD1" source="67420" target="67372" cy:directed="1"/>
      <edge id="81576" label="ARID2 (GRN) PPAP2C" source="67420" target="67368" cy:directed="1"/>
      <edge id="81575" label="ARID2 (GRN) WDR54" source="67420" target="67367" cy:directed="1"/>
      <edge id="81574" label="ARID2 (GRN) NPHP1" source="67420" target="67366" cy:directed="1"/>
      <edge id="81573" label="ARID2 (GRN) GRIN3B" source="67420" target="67365" cy:directed="1"/>
      <edge id="81572" label="ARID2 (GRN) C9orf117" source="67420" target="67364" cy:directed="1"/>
      <edge id="81571" label="ARID2 (GRN) DNAH10" source="67420" target="67363" cy:directed="1"/>
      <edge id="81570" label="ARID2 (GRN) CDHR3" source="67420" target="67350" cy:directed="1"/>
      <edge id="81569" label="ARID2 (GRN) FANK1" source="67420" target="67361" cy:directed="1"/>
      <edge id="81568" label="ARID2 (GRN) C4orf47" source="67420" target="67360" cy:directed="1"/>
      <edge id="81567" label="ARID2 (GRN) ARHGAP39" source="67420" target="67359" cy:directed="1"/>
      <edge id="81566" label="ARID2 (GRN) PPIL6" source="67420" target="67358" cy:directed="1"/>
      <edge id="81565" label="ARID2 (GRN) C3orf67" source="67420" target="67357" cy:directed="1"/>
      <edge id="81564" label="ARID2 (GRN) CCDC180" source="67420" target="67354" cy:directed="1"/>
      <edge id="81563" label="ARID2 (GRN) PIH1D2" source="67420" target="67309" cy:directed="1"/>
      <edge id="81562" label="ARID2 (GRN) CETN2" source="67420" target="67352" cy:directed="1"/>
      <edge id="81561" label="ARID2 (GRN) MAK" source="67420" target="67351" cy:directed="1"/>
      <edge id="81560" label="ARID2 (GRN) TSPAN1" source="67420" target="67348" cy:directed="1"/>
      <edge id="81559" label="ARID2 (GRN) CCNO" source="67420" target="67347" cy:directed="1"/>
      <edge id="81558" label="ARID2 (GRN) C1orf192" source="67420" target="67308" cy:directed="1"/>
      <edge id="81557" label="ARID2 (GRN) LRRC23" source="67420" target="67346" cy:directed="1"/>
      <edge id="81556" label="ARID2 (GRN) LRRC48" source="67420" target="67307" cy:directed="1"/>
      <edge id="81555" label="ARID2 (GRN) SPEF1" source="67420" target="67345" cy:directed="1"/>
      <edge id="81554" label="ARID2 (GRN) ZMYND10" source="67420" target="67344" cy:directed="1"/>
      <edge id="81553" label="ARID2 (GRN) WDR66" source="67420" target="67343" cy:directed="1"/>
      <edge id="81552" label="ARID2 (GRN) TP73" source="67420" target="67342" cy:directed="1"/>
      <edge id="81551" label="HSF1 (GRN) CD33" source="67419" target="66550" cy:directed="1"/>
      <edge id="81550" label="HSF1 (GRN) MACROD2" source="67419" target="66598" cy:directed="1"/>
      <edge id="81549" label="HSF1 (GRN) PSMG3" source="67419" target="66829" cy:directed="1"/>
      <edge id="81548" label="HSF1 (GRN) CDCA4" source="67419" target="67284" cy:directed="1"/>
      <edge id="81547" label="HSF1 (GRN) SLC25A20" source="67419" target="66949" cy:directed="1"/>
      <edge id="81546" label="HSF1 (GRN) MIS18A" source="67419" target="66480" cy:directed="1"/>
      <edge id="81545" label="HSF1 (GRN) MRPL3" source="67419" target="66465" cy:directed="1"/>
      <edge id="81544" label="HSF1 (GRN) SLC35A4" source="67419" target="66607" cy:directed="1"/>
      <edge id="81543" label="HSF1 (GRN) CPSF3" source="67419" target="66575" cy:directed="1"/>
      <edge id="81542" label="HSF1 (GRN) LYRM2" source="67419" target="66457" cy:directed="1"/>
      <edge id="81541" label="ELK3 (GRN) CPSF3" source="67418" target="66575" cy:directed="1"/>
      <edge id="81540" label="ELK3 (GRN) POLR2C" source="67418" target="66527" cy:directed="1"/>
      <edge id="81539" label="ELK3 (GRN) ALG1" source="67418" target="66441" cy:directed="1"/>
      <edge id="81538" label="ELK3 (GRN) LRRK2" source="67418" target="66454" cy:directed="1"/>
      <edge id="81537" label="ELK3 (GRN) MIS18A" source="67418" target="66480" cy:directed="1"/>
      <edge id="81536" label="MIPEP (GCN) IGSF9" source="67417" target="67409" cy:directed="1"/>
      <edge id="81535" label="RFX4 (GRN) CYP2J2" source="67416" target="67982" cy:directed="1"/>
      <edge id="81534" label="RFX4 (GRN) C11orf70" source="67416" target="67887" cy:directed="1"/>
      <edge id="81533" label="RFX4 (GRN) CD163" source="67416" target="66816" cy:directed="1"/>
      <edge id="81532" label="RFX4 (GRN) HSPB11" source="67416" target="67981" cy:directed="1"/>
      <edge id="81531" label="RFX4 (GRN) RTDR1" source="67416" target="67973" cy:directed="1"/>
      <edge id="81530" label="RFX4 (GRN) DYX1C1" source="67416" target="66654" cy:directed="1"/>
      <edge id="81529" label="RFX4 (GRN) CP" source="67416" target="67403" cy:directed="1"/>
      <edge id="81528" label="RFX4 (GRN) TJP3" source="67416" target="67985" cy:directed="1"/>
      <edge id="81527" label="RFX4 (GRN) SYT8" source="67416" target="67980" cy:directed="1"/>
      <edge id="81526" label="RFX4 (GRN) IQCC" source="67416" target="67971" cy:directed="1"/>
      <edge id="81525" label="RFX4 (GRN) HEATR2" source="67416" target="67984" cy:directed="1"/>
      <edge id="81524" label="RFX4 (GRN) EFCAB11" source="67416" target="67968" cy:directed="1"/>
      <edge id="81523" label="RFX4 (GRN) OSCP1" source="67416" target="67966" cy:directed="1"/>
      <edge id="81522" label="RFX4 (GRN) AK7" source="67416" target="67965" cy:directed="1"/>
      <edge id="81521" label="RFX4 (GRN) TSPAN3" source="67416" target="66900" cy:directed="1"/>
      <edge id="81520" label="RFX4 (GRN) ZMYND12" source="67416" target="67964" cy:directed="1"/>
      <edge id="81519" label="RFX4 (GRN) ACSBG1" source="67416" target="67963" cy:directed="1"/>
      <edge id="81518" label="RFX4 (GRN) GYG2" source="67416" target="67880" cy:directed="1"/>
      <edge id="81517" label="RFX4 (GRN) KIF9" source="67416" target="67962" cy:directed="1"/>
      <edge id="81516" label="RFX4 (GRN) ANKRD54" source="67416" target="67909" cy:directed="1"/>
      <edge id="81515" label="RFX4 (GRN) KIAA1522" source="67416" target="67218" cy:directed="1"/>
      <edge id="81514" label="RFX4 (GRN) SORD" source="67416" target="67983" cy:directed="1"/>
      <edge id="81513" label="RFX4 (GRN) IDH2" source="67416" target="67135" cy:directed="1"/>
      <edge id="81512" label="RFX4 (GRN) PPP1R14C" source="67416" target="67137" cy:directed="1"/>
      <edge id="81511" label="RFX4 (GRN) GLB1L2" source="67416" target="67978" cy:directed="1"/>
      <edge id="81510" label="RFX4 (GRN) SLC44A4" source="67416" target="67413" cy:directed="1"/>
      <edge id="81509" label="RFX4 (GRN) DTHD1" source="67416" target="67961" cy:directed="1"/>
      <edge id="81508" label="RFX4 (GRN) HN1L" source="67416" target="67512" cy:directed="1"/>
      <edge id="81507" label="RFX4 (GRN) IQUB" source="67416" target="67959" cy:directed="1"/>
      <edge id="81506" label="RFX4 (GRN) DYNC2H1" source="67416" target="67977" cy:directed="1"/>
      <edge id="81505" label="RFX4 (GRN) PACRG" source="67416" target="67957" cy:directed="1"/>
      <edge id="81504" label="RFX4 (GRN) CDH26" source="67416" target="67956" cy:directed="1"/>
      <edge id="81503" label="RFX4 (GRN) SPA17" source="67416" target="67410" cy:directed="1"/>
      <edge id="81502" label="RFX4 (GRN) C20orf26" source="67416" target="67955" cy:directed="1"/>
      <edge id="81501" label="RFX4 (GRN) VSTM2L" source="67416" target="67976" cy:directed="1"/>
      <edge id="81500" label="RFX4 (GRN) PARN" source="67416" target="67495" cy:directed="1"/>
      <edge id="81499" label="RFX4 (GRN) CCDC113" source="67416" target="67954" cy:directed="1"/>
      <edge id="81498" label="RFX4 (GRN) CDS1" source="67416" target="67975" cy:directed="1"/>
      <edge id="81497" label="RFX4 (GRN) RPGRIP1L" source="67416" target="67953" cy:directed="1"/>
      <edge id="81496" label="RFX4 (GRN) TTC18" source="67416" target="67952" cy:directed="1"/>
      <edge id="81495" label="RFX4 (GRN) PRR15" source="67416" target="67951" cy:directed="1"/>
      <edge id="81494" label="RFX4 (GRN) ZNF474" source="67416" target="67950" cy:directed="1"/>
      <edge id="81493" label="RFX4 (GRN) ENKUR" source="67416" target="67949" cy:directed="1"/>
      <edge id="81492" label="RFX4 (GRN) ZNF273" source="67416" target="67948" cy:directed="1"/>
      <edge id="81491" label="RFX4 (GRN) C9orf9" source="67416" target="67947" cy:directed="1"/>
      <edge id="81490" label="RFX4 (GRN) CCDC153" source="67416" target="67946" cy:directed="1"/>
      <edge id="81489" label="RFX4 (GRN) TTC23L" source="67416" target="67945" cy:directed="1"/>
      <edge id="81488" label="RFX4 (GRN) MAT1A" source="67416" target="67944" cy:directed="1"/>
      <edge id="81487" label="RFX4 (GRN) EFCAB10" source="67416" target="67943" cy:directed="1"/>
      <edge id="81486" label="RFX4 (GRN) ARX" source="67416" target="67942" cy:directed="1"/>
      <edge id="81485" label="RFX4 (GRN) C16orf93" source="67416" target="67941" cy:directed="1"/>
      <edge id="81484" label="RFX4 (GRN) CCDC170" source="67416" target="67940" cy:directed="1"/>
      <edge id="81483" label="RFX4 (GRN) TMEM231" source="67416" target="67939" cy:directed="1"/>
      <edge id="81482" label="RFX4 (GRN) RABL2B" source="67416" target="67908" cy:directed="1"/>
      <edge id="81481" label="RFX4 (GRN) C9orf116" source="67416" target="67938" cy:directed="1"/>
      <edge id="81480" label="RFX4 (GRN) RSPH9" source="67416" target="67937" cy:directed="1"/>
      <edge id="81479" label="RFX4 (GRN) CD164L2" source="67416" target="67936" cy:directed="1"/>
      <edge id="81478" label="RFX4 (GRN) NEK5" source="67416" target="67935" cy:directed="1"/>
      <edge id="81477" label="RFX4 (GRN) CCDC65" source="67416" target="67934" cy:directed="1"/>
      <edge id="81476" label="RFX4 (GRN) ESPN" source="67416" target="67933" cy:directed="1"/>
      <edge id="81475" label="RFX4 (GRN) DRC1" source="67416" target="67932" cy:directed="1"/>
      <edge id="81474" label="RFX4 (GRN) MOK" source="67416" target="67931" cy:directed="1"/>
      <edge id="81473" label="RFX4 (GRN) KIF24" source="67416" target="67930" cy:directed="1"/>
      <edge id="81472" label="RFX4 (GRN) C8orf47" source="67416" target="67929" cy:directed="1"/>
      <edge id="81471" label="RFX4 (GRN) C9orf24" source="67416" target="67928" cy:directed="1"/>
      <edge id="81470" label="RFX4 (GRN) EFCAB12" source="67416" target="67927" cy:directed="1"/>
      <edge id="81469" label="RFX4 (GRN) SPATA18" source="67416" target="67926" cy:directed="1"/>
      <edge id="81468" label="RFX4 (GRN) ALDH3B1" source="67416" target="67171" cy:directed="1"/>
      <edge id="81467" label="RFX4 (GRN) TTC30B" source="67416" target="67415" cy:directed="1"/>
      <edge id="81466" label="RFX4 (GRN) ST6GALNAC1" source="67416" target="67414" cy:directed="1"/>
      <edge id="81465" label="RFX4 (GRN) EPN3" source="67416" target="67401" cy:directed="1"/>
      <edge id="81464" label="RFX4 (GRN) DZIP1L" source="67416" target="67402" cy:directed="1"/>
      <edge id="81463" label="RFX4 (GRN) CCDC24" source="67416" target="67411" cy:directed="1"/>
      <edge id="81462" label="RFX4 (GRN) FGFR2" source="67416" target="67189" cy:directed="1"/>
      <edge id="81461" label="RFX4 (GRN) STEAP3" source="67416" target="67202" cy:directed="1"/>
      <edge id="81460" label="RFX4 (GRN) FAM227A" source="67416" target="67400" cy:directed="1"/>
      <edge id="81459" label="RFX4 (GRN) MIPEP" source="67416" target="67417" cy:directed="1"/>
      <edge id="81458" label="RFX4 (GRN) CCDC13" source="67416" target="67399" cy:directed="1"/>
      <edge id="81457" label="RFX4 (GRN) SLC52A1" source="67416" target="67398" cy:directed="1"/>
      <edge id="81456" label="RFX4 (GRN) IGSF9" source="67416" target="67409" cy:directed="1"/>
      <edge id="81455" label="RFX4 (GRN) SRCIN1" source="67416" target="67394" cy:directed="1"/>
      <edge id="81454" label="RFX4 (GRN) PVRL4" source="67416" target="67393" cy:directed="1"/>
      <edge id="81453" label="RFX4 (GRN) IFT46" source="67416" target="67391" cy:directed="1"/>
      <edge id="81452" label="RFX4 (GRN) SPTBN2" source="67416" target="67408" cy:directed="1"/>
      <edge id="81451" label="RFX4 (GRN) SNX25" source="67416" target="66437" cy:directed="1"/>
      <edge id="81450" label="RFX4 (GRN) HMGB3" source="67416" target="67240" cy:directed="1"/>
      <edge id="81449" label="RFX4 (GRN) TRIP13" source="67416" target="66606" cy:directed="1"/>
      <edge id="81448" label="RFX4 (GRN) TMEM184A" source="67416" target="66999" cy:directed="1"/>
      <edge id="81447" label="RFX4 (GRN) WDR96" source="67416" target="67371" cy:directed="1"/>
      <edge id="81446" label="RFX4 (GRN) DNALI1" source="67416" target="67312" cy:directed="1"/>
      <edge id="81445" label="RFX4 (GRN) OTX1" source="67416" target="67390" cy:directed="1"/>
      <edge id="81444" label="RFX4 (GRN) TLCD1" source="67416" target="67130" cy:directed="1"/>
      <edge id="81443" label="RFX4 (GRN) TIGD4" source="67416" target="67388" cy:directed="1"/>
      <edge id="81442" label="RFX4 (GRN) C17orf72" source="67416" target="67387" cy:directed="1"/>
      <edge id="81441" label="RFX4 (GRN) AK8" source="67416" target="67311" cy:directed="1"/>
      <edge id="81440" label="RFX4 (GRN) DNAAF1" source="67416" target="67386" cy:directed="1"/>
      <edge id="81439" label="RFX4 (GRN) TSNAXIP1" source="67416" target="67384" cy:directed="1"/>
      <edge id="81438" label="RFX4 (GRN) PAX9" source="67416" target="67382" cy:directed="1"/>
      <edge id="81437" label="RFX4 (GRN) C10orf95" source="67416" target="67405" cy:directed="1"/>
      <edge id="81436" label="RFX4 (GRN) RIBC1" source="67416" target="67379" cy:directed="1"/>
      <edge id="81435" label="RFX4 (GRN) ADGB" source="67416" target="67378" cy:directed="1"/>
      <edge id="81434" label="RFX4 (GRN) WDR16" source="67416" target="67377" cy:directed="1"/>
      <edge id="81433" label="RFX4 (GRN) CCDC151" source="67416" target="67376" cy:directed="1"/>
      <edge id="81432" label="RFX4 (GRN) LRRC46" source="67416" target="67310" cy:directed="1"/>
      <edge id="81431" label="RFX4 (GRN) FAM154B" source="67416" target="67375" cy:directed="1"/>
      <edge id="81430" label="RFX4 (GRN) SIX1" source="67416" target="67374" cy:directed="1"/>
      <edge id="81429" label="RFX4 (GRN) CCDC114" source="67416" target="67373" cy:directed="1"/>
      <edge id="81428" label="RFX4 (GRN) FHAD1" source="67416" target="67372" cy:directed="1"/>
      <edge id="81427" label="RFX4 (GRN) MDH1B" source="67416" target="67370" cy:directed="1"/>
      <edge id="81426" label="RFX4 (GRN) LRRK2" source="67416" target="66454" cy:directed="1"/>
      <edge id="81425" label="RFX4 (GRN) CDHR3" source="67416" target="67350" cy:directed="1"/>
      <edge id="81424" label="RFX4 (GRN) RHOV" source="67416" target="67369" cy:directed="1"/>
      <edge id="81423" label="RFX4 (GRN) PPAP2C" source="67416" target="67368" cy:directed="1"/>
      <edge id="81422" label="RFX4 (GRN) NPHP1" source="67416" target="67366" cy:directed="1"/>
      <edge id="81421" label="RFX4 (GRN) GRIN3B" source="67416" target="67365" cy:directed="1"/>
      <edge id="81420" label="RFX4 (GRN) C9orf117" source="67416" target="67364" cy:directed="1"/>
      <edge id="81419" label="RFX4 (GRN) DNAH10" source="67416" target="67363" cy:directed="1"/>
      <edge id="81418" label="RFX4 (GRN) FAM166B" source="67416" target="67362" cy:directed="1"/>
      <edge id="81417" label="RFX4 (GRN) FANK1" source="67416" target="67361" cy:directed="1"/>
      <edge id="81416" label="RFX4 (GRN) C4orf47" source="67416" target="67360" cy:directed="1"/>
      <edge id="81415" label="RFX4 (GRN) ARHGAP39" source="67416" target="67359" cy:directed="1"/>
      <edge id="81414" label="RFX4 (GRN) PPIL6" source="67416" target="67358" cy:directed="1"/>
      <edge id="81413" label="RFX4 (GRN) C3orf67" source="67416" target="67357" cy:directed="1"/>
      <edge id="81412" label="RFX4 (GRN) SPAG8" source="67416" target="67356" cy:directed="1"/>
      <edge id="81411" label="RFX4 (GRN) KLHL32" source="67416" target="67355" cy:directed="1"/>
      <edge id="81410" label="RFX4 (GRN) CCDC180" source="67416" target="67354" cy:directed="1"/>
      <edge id="81409" label="RFX4 (GRN) C22orf15" source="67416" target="67353" cy:directed="1"/>
      <edge id="81408" label="RFX4 (GRN) PIH1D2" source="67416" target="67309" cy:directed="1"/>
      <edge id="81407" label="RFX4 (GRN) CETN2" source="67416" target="67352" cy:directed="1"/>
      <edge id="81406" label="RFX4 (GRN) MAK" source="67416" target="67351" cy:directed="1"/>
      <edge id="81405" label="RFX4 (GRN) ROPN1L" source="67416" target="67349" cy:directed="1"/>
      <edge id="81404" label="RFX4 (GRN) TSPAN1" source="67416" target="67348" cy:directed="1"/>
      <edge id="81403" label="RFX4 (GRN) CCNO" source="67416" target="67347" cy:directed="1"/>
      <edge id="81402" label="RFX4 (GRN) C1orf192" source="67416" target="67308" cy:directed="1"/>
      <edge id="81401" label="RFX4 (GRN) LRRC23" source="67416" target="67346" cy:directed="1"/>
      <edge id="81400" label="RFX4 (GRN) LRRC48" source="67416" target="67307" cy:directed="1"/>
      <edge id="81399" label="RFX4 (GRN) SPEF1" source="67416" target="67345" cy:directed="1"/>
      <edge id="81398" label="RFX4 (GRN) ZMYND10" source="67416" target="67344" cy:directed="1"/>
      <edge id="81397" label="RFX4 (GRN) WDR66" source="67416" target="67343" cy:directed="1"/>
      <edge id="81396" label="RFX4 (GRN) TP73" source="67416" target="67342" cy:directed="1"/>
      <edge id="81395" label="TTC30B (GCN) IGSF9" source="67415" target="67409" cy:directed="1"/>
      <edge id="81394" label="ST6GALNAC1 (GCN) IGSF9" source="67414" target="67409" cy:directed="1"/>
      <edge id="81393" label="SLC44A4 (GCN) SIX4" source="67413" target="67406" cy:directed="1"/>
      <edge id="81392" label="RUVBL2 (GCN) LRRC46" source="67412" target="67310" cy:directed="1"/>
      <edge id="81391" label="CCDC24 (GCN) IGSF9" source="67411" target="67409" cy:directed="1"/>
      <edge id="81390" label="SPA17 (GCN) SIX4" source="67410" target="67406" cy:directed="1"/>
      <edge id="81389" label="IGSF9 (GCN) C10orf95" source="67409" target="67405" cy:directed="1"/>
      <edge id="81388" label="IGSF9 (GCN) RABL2B" source="67409" target="67908" cy:directed="1"/>
      <edge id="81387" label="IGSF9 (GCN) SYT8" source="67409" target="67980" cy:directed="1"/>
      <edge id="81386" label="IGSF9 (GCN) GLB1L2" source="67409" target="67978" cy:directed="1"/>
      <edge id="81385" label="SPTBN2 (GCN) MIPEP" source="67408" target="67417" cy:directed="1"/>
      <edge id="81384" label="SPTBN2 (GCN) TMEM184A" source="67408" target="66999" cy:directed="1"/>
      <edge id="81383" label="SPTBN2 (GCN) CYP2J2" source="67408" target="67982" cy:directed="1"/>
      <edge id="81382" label="SPTBN2 (GCN) C10orf95" source="67408" target="67405" cy:directed="1"/>
      <edge id="81381" label="SPTBN2 (GCN) IGSF9" source="67408" target="67409" cy:directed="1"/>
      <edge id="81380" label="SPTBN2 (GCN) RUVBL2" source="67408" target="67412" cy:directed="1"/>
      <edge id="81379" label="SPTBN2 (GCN) FBXW9" source="67408" target="67407" cy:directed="1"/>
      <edge id="81378" label="SPTBN2 (GCN) VSTM2L" source="67408" target="67976" cy:directed="1"/>
      <edge id="81377" label="FBXW9 (GCN) IGSF9" source="67407" target="67409" cy:directed="1"/>
      <edge id="81376" label="SIX4 (GCN) DZIP1L" source="67406" target="67402" cy:directed="1"/>
      <edge id="81375" label="SIX4 (GCN) C11orf70" source="67406" target="67887" cy:directed="1"/>
      <edge id="81374" label="SIX4 (GCN) CCDC176" source="67406" target="67979" cy:directed="1"/>
      <edge id="81373" label="SIX4 (GCN) C17orf72" source="67406" target="67387" cy:directed="1"/>
      <edge id="81372" label="SIX4 (GCN) TTC18" source="67406" target="67952" cy:directed="1"/>
      <edge id="81371" label="SIX4 (GCN) LRRC23" source="67406" target="67346" cy:directed="1"/>
      <edge id="81370" label="SIX4 (GCN) LRRC46" source="67406" target="67310" cy:directed="1"/>
      <edge id="81369" label="SIX4 (GCN) AK8" source="67406" target="67311" cy:directed="1"/>
      <edge id="81368" label="SIX4 (GCN) CCDC153" source="67406" target="67946" cy:directed="1"/>
      <edge id="81367" label="SIX4 (GCN) C9orf9" source="67406" target="67947" cy:directed="1"/>
      <edge id="81366" label="SIX4 (GCN) PIH1D2" source="67406" target="67309" cy:directed="1"/>
      <edge id="81365" label="SIX4 (GCN) RSPH9" source="67406" target="67937" cy:directed="1"/>
      <edge id="81364" label="SIX4 (GCN) C9orf116" source="67406" target="67938" cy:directed="1"/>
      <edge id="81363" label="SIX4 (GCN) FHAD1" source="67406" target="67372" cy:directed="1"/>
      <edge id="81362" label="SIX4 (GCN) TMEM231" source="67406" target="67939" cy:directed="1"/>
      <edge id="81361" label="SIX4 (GCN) CCDC65" source="67406" target="67934" cy:directed="1"/>
      <edge id="81360" label="SIX4 (GCN) TSPAN1" source="67406" target="67348" cy:directed="1"/>
      <edge id="81359" label="SIX4 (GCN) CCDC13" source="67406" target="67399" cy:directed="1"/>
      <edge id="81358" label="SIX4 (GCN) SPATA18" source="67406" target="67926" cy:directed="1"/>
      <edge id="81357" label="C10orf95 (GCN) LRRC46" source="67405" target="67310" cy:directed="1"/>
      <edge id="81356" label="RFX2 (GRN) CYP2J2" source="67404" target="67982" cy:directed="1"/>
      <edge id="81355" label="RFX2 (GRN) TMEM254" source="67404" target="67883" cy:directed="1"/>
      <edge id="81354" label="RFX2 (GRN) NEK10" source="67404" target="67974" cy:directed="1"/>
      <edge id="81353" label="RFX2 (GRN) ABHD11" source="67404" target="67316" cy:directed="1"/>
      <edge id="81352" label="RFX2 (GRN) HSPB11" source="67404" target="67981" cy:directed="1"/>
      <edge id="81351" label="RFX2 (GRN) RTDR1" source="67404" target="67973" cy:directed="1"/>
      <edge id="81350" label="RFX2 (GRN) DYX1C1" source="67404" target="66654" cy:directed="1"/>
      <edge id="81349" label="RFX2 (GRN) SYT8" source="67404" target="67980" cy:directed="1"/>
      <edge id="81348" label="RFX2 (GRN) TMEM232" source="67404" target="67972" cy:directed="1"/>
      <edge id="81347" label="RFX2 (GRN) IQCC" source="67404" target="67971" cy:directed="1"/>
      <edge id="81346" label="RFX2 (GRN) CCDC74B" source="67404" target="67970" cy:directed="1"/>
      <edge id="81345" label="RFX2 (GRN) SLC27A2" source="67404" target="67969" cy:directed="1"/>
      <edge id="81344" label="RFX2 (GRN) ALDH3B1" source="67404" target="67171" cy:directed="1"/>
      <edge id="81343" label="RFX2 (GRN) C11orf70" source="67404" target="67887" cy:directed="1"/>
      <edge id="81342" label="RFX2 (GRN) EFCAB11" source="67404" target="67968" cy:directed="1"/>
      <edge id="81341" label="RFX2 (GRN) UBXN10" source="67404" target="67967" cy:directed="1"/>
      <edge id="81340" label="RFX2 (GRN) RPA3" source="67404" target="66962" cy:directed="1"/>
      <edge id="81339" label="RFX2 (GRN) OSCP1" source="67404" target="67966" cy:directed="1"/>
      <edge id="81338" label="RFX2 (GRN) AK7" source="67404" target="67965" cy:directed="1"/>
      <edge id="81337" label="RFX2 (GRN) ZMYND12" source="67404" target="67964" cy:directed="1"/>
      <edge id="81336" label="RFX2 (GRN) ACSBG1" source="67404" target="67963" cy:directed="1"/>
      <edge id="81335" label="RFX2 (GRN) GYG2" source="67404" target="67880" cy:directed="1"/>
      <edge id="81334" label="RFX2 (GRN) CCDC176" source="67404" target="67979" cy:directed="1"/>
      <edge id="81333" label="RFX2 (GRN) KIF9" source="67404" target="67962" cy:directed="1"/>
      <edge id="81332" label="RFX2 (GRN) ANKRD54" source="67404" target="67909" cy:directed="1"/>
      <edge id="81331" label="RFX2 (GRN) IDH2" source="67404" target="67135" cy:directed="1"/>
      <edge id="81330" label="RFX2 (GRN) GLB1L2" source="67404" target="67978" cy:directed="1"/>
      <edge id="81329" label="RFX2 (GRN) DTHD1" source="67404" target="67961" cy:directed="1"/>
      <edge id="81328" label="RFX2 (GRN) C16orf71" source="67404" target="67960" cy:directed="1"/>
      <edge id="81327" label="RFX2 (GRN) HN1L" source="67404" target="67512" cy:directed="1"/>
      <edge id="81326" label="RFX2 (GRN) IQUB" source="67404" target="67959" cy:directed="1"/>
      <edge id="81325" label="RFX2 (GRN) DYNC2H1" source="67404" target="67977" cy:directed="1"/>
      <edge id="81324" label="RFX2 (GRN) ZDHHC13" source="67404" target="67958" cy:directed="1"/>
      <edge id="81323" label="RFX2 (GRN) PACRG" source="67404" target="67957" cy:directed="1"/>
      <edge id="81322" label="RFX2 (GRN) C20orf26" source="67404" target="67955" cy:directed="1"/>
      <edge id="81321" label="RFX2 (GRN) VSTM2L" source="67404" target="67976" cy:directed="1"/>
      <edge id="81320" label="RFX2 (GRN) CCDC113" source="67404" target="67954" cy:directed="1"/>
      <edge id="81319" label="RFX2 (GRN) CDS1" source="67404" target="67975" cy:directed="1"/>
      <edge id="81318" label="RFX2 (GRN) RPGRIP1L" source="67404" target="67953" cy:directed="1"/>
      <edge id="81317" label="RFX2 (GRN) TTC18" source="67404" target="67952" cy:directed="1"/>
      <edge id="81316" label="RFX2 (GRN) PRR15" source="67404" target="67951" cy:directed="1"/>
      <edge id="81315" label="RFX2 (GRN) ZNF474" source="67404" target="67950" cy:directed="1"/>
      <edge id="81314" label="RFX2 (GRN) ENKUR" source="67404" target="67949" cy:directed="1"/>
      <edge id="81313" label="RFX2 (GRN) ZNF273" source="67404" target="67948" cy:directed="1"/>
      <edge id="81312" label="RFX2 (GRN) C9orf9" source="67404" target="67947" cy:directed="1"/>
      <edge id="81311" label="RFX2 (GRN) CCDC153" source="67404" target="67946" cy:directed="1"/>
      <edge id="81310" label="RFX2 (GRN) TTC23L" source="67404" target="67945" cy:directed="1"/>
      <edge id="81309" label="RFX2 (GRN) MAT1A" source="67404" target="67944" cy:directed="1"/>
      <edge id="81308" label="RFX2 (GRN) EFCAB10" source="67404" target="67943" cy:directed="1"/>
      <edge id="81307" label="RFX2 (GRN) ARX" source="67404" target="67942" cy:directed="1"/>
      <edge id="81306" label="RFX2 (GRN) C16orf93" source="67404" target="67941" cy:directed="1"/>
      <edge id="81305" label="RFX2 (GRN) CCDC170" source="67404" target="67940" cy:directed="1"/>
      <edge id="81304" label="RFX2 (GRN) TMEM231" source="67404" target="67939" cy:directed="1"/>
      <edge id="81303" label="RFX2 (GRN) RABL2B" source="67404" target="67908" cy:directed="1"/>
      <edge id="81302" label="RFX2 (GRN) C9orf116" source="67404" target="67938" cy:directed="1"/>
      <edge id="81301" label="RFX2 (GRN) RSPH9" source="67404" target="67937" cy:directed="1"/>
      <edge id="81300" label="RFX2 (GRN) CD164L2" source="67404" target="67936" cy:directed="1"/>
      <edge id="81299" label="RFX2 (GRN) NEK5" source="67404" target="67935" cy:directed="1"/>
      <edge id="81298" label="RFX2 (GRN) CCDC65" source="67404" target="67934" cy:directed="1"/>
      <edge id="81297" label="RFX2 (GRN) ESPN" source="67404" target="67933" cy:directed="1"/>
      <edge id="81296" label="RFX2 (GRN) DRC1" source="67404" target="67932" cy:directed="1"/>
      <edge id="81295" label="RFX2 (GRN) MOK" source="67404" target="67931" cy:directed="1"/>
      <edge id="81294" label="RFX2 (GRN) KIF24" source="67404" target="67930" cy:directed="1"/>
      <edge id="81293" label="RFX2 (GRN) C8orf47" source="67404" target="67929" cy:directed="1"/>
      <edge id="81292" label="RFX2 (GRN) C9orf24" source="67404" target="67928" cy:directed="1"/>
      <edge id="81291" label="RFX2 (GRN) EFCAB12" source="67404" target="67927" cy:directed="1"/>
      <edge id="81290" label="RFX2 (GRN) SPATA18" source="67404" target="67926" cy:directed="1"/>
      <edge id="81289" label="RFX2 (GRN) CP" source="67404" target="67403" cy:directed="1"/>
      <edge id="81288" label="RFX2 (GRN) TTC30B" source="67404" target="67415" cy:directed="1"/>
      <edge id="81287" label="RFX2 (GRN) ST6GALNAC1" source="67404" target="67414" cy:directed="1"/>
      <edge id="81286" label="RFX2 (GRN) SLC44A4" source="67404" target="67413" cy:directed="1"/>
      <edge id="81285" label="RFX2 (GRN) DZIP1L" source="67404" target="67402" cy:directed="1"/>
      <edge id="81284" label="RFX2 (GRN) EPN3" source="67404" target="67401" cy:directed="1"/>
      <edge id="81283" label="RFX2 (GRN) RUVBL2" source="67404" target="67412" cy:directed="1"/>
      <edge id="81282" label="RFX2 (GRN) CCDC24" source="67404" target="67411" cy:directed="1"/>
      <edge id="81281" label="RFX2 (GRN) FGFR2" source="67404" target="67189" cy:directed="1"/>
      <edge id="81280" label="RFX2 (GRN) STEAP3" source="67404" target="67202" cy:directed="1"/>
      <edge id="81279" label="RFX2 (GRN) FAM227A" source="67404" target="67400" cy:directed="1"/>
      <edge id="81278" label="RFX2 (GRN) CENPM" source="67404" target="67274" cy:directed="1"/>
      <edge id="81277" label="RFX2 (GRN) CCDC13" source="67404" target="67399" cy:directed="1"/>
      <edge id="81276" label="RFX2 (GRN) SLC52A1" source="67404" target="67398" cy:directed="1"/>
      <edge id="81275" label="RFX2 (GRN) E2F8" source="67404" target="67397" cy:directed="1"/>
      <edge id="81274" label="RFX2 (GRN) SPA17" source="67404" target="67410" cy:directed="1"/>
      <edge id="81273" label="RFX2 (GRN) IGSF9" source="67404" target="67409" cy:directed="1"/>
      <edge id="81272" label="RFX2 (GRN) NGEF" source="67404" target="67396" cy:directed="1"/>
      <edge id="81271" label="RFX2 (GRN) RABL5" source="67404" target="67395" cy:directed="1"/>
      <edge id="81270" label="RFX2 (GRN) SRCIN1" source="67404" target="67394" cy:directed="1"/>
      <edge id="81269" label="RFX2 (GRN) IFT46" source="67404" target="67391" cy:directed="1"/>
      <edge id="81268" label="RFX2 (GRN) SPTBN2" source="67404" target="67408" cy:directed="1"/>
      <edge id="81267" label="RFX2 (GRN) HMGB3" source="67404" target="67240" cy:directed="1"/>
      <edge id="81266" label="RFX2 (GRN) FBXW9" source="67404" target="67407" cy:directed="1"/>
      <edge id="81265" label="RFX2 (GRN) TRIP13" source="67404" target="66606" cy:directed="1"/>
      <edge id="81264" label="RFX2 (GRN) DNALI1" source="67404" target="67312" cy:directed="1"/>
      <edge id="81263" label="RFX2 (GRN) OTX1" source="67404" target="67390" cy:directed="1"/>
      <edge id="81262" label="RFX2 (GRN) TCTEX1D1" source="67404" target="67389" cy:directed="1"/>
      <edge id="81261" label="RFX2 (GRN) TIGD4" source="67404" target="67388" cy:directed="1"/>
      <edge id="81260" label="RFX2 (GRN) C17orf72" source="67404" target="67387" cy:directed="1"/>
      <edge id="81259" label="RFX2 (GRN) AK8" source="67404" target="67311" cy:directed="1"/>
      <edge id="81258" label="RFX2 (GRN) DNAAF1" source="67404" target="67386" cy:directed="1"/>
      <edge id="81257" label="RFX2 (GRN) DENND6B" source="67404" target="67385" cy:directed="1"/>
      <edge id="81256" label="RFX2 (GRN) PAX9" source="67404" target="67382" cy:directed="1"/>
      <edge id="81255" label="RFX2 (GRN) TSNAXIP1" source="67404" target="67384" cy:directed="1"/>
      <edge id="81254" label="RFX2 (GRN) PPP1R32" source="67404" target="67381" cy:directed="1"/>
      <edge id="81253" label="RFX2 (GRN) SIX4" source="67404" target="67406" cy:directed="1"/>
      <edge id="81252" label="RFX2 (GRN) RAB36" source="67404" target="67380" cy:directed="1"/>
      <edge id="81251" label="RFX2 (GRN) C10orf95" source="67404" target="67405" cy:directed="1"/>
      <edge id="81250" label="RFX2 (GRN) RIBC1" source="67404" target="67379" cy:directed="1"/>
      <edge id="81249" label="RFX2 (GRN) ADGB" source="67404" target="67378" cy:directed="1"/>
      <edge id="81248" label="RFX2 (GRN) WDR16" source="67404" target="67377" cy:directed="1"/>
      <edge id="81247" label="RFX2 (GRN) CCDC151" source="67404" target="67376" cy:directed="1"/>
      <edge id="81246" label="RFX2 (GRN) LRRC46" source="67404" target="67310" cy:directed="1"/>
      <edge id="81245" label="RFX2 (GRN) FAM154B" source="67404" target="67375" cy:directed="1"/>
      <edge id="81244" label="RFX2 (GRN) SIX1" source="67404" target="67374" cy:directed="1"/>
      <edge id="81243" label="RFX2 (GRN) CCDC114" source="67404" target="67373" cy:directed="1"/>
      <edge id="81242" label="RFX2 (GRN) FHAD1" source="67404" target="67372" cy:directed="1"/>
      <edge id="81241" label="RFX2 (GRN) WDR96" source="67404" target="67371" cy:directed="1"/>
      <edge id="81240" label="RFX2 (GRN) MDH1B" source="67404" target="67370" cy:directed="1"/>
      <edge id="81239" label="RFX2 (GRN) RHOV" source="67404" target="67369" cy:directed="1"/>
      <edge id="81238" label="RFX2 (GRN) PPAP2C" source="67404" target="67368" cy:directed="1"/>
      <edge id="81237" label="RFX2 (GRN) WDR54" source="67404" target="67367" cy:directed="1"/>
      <edge id="81236" label="RFX2 (GRN) NPHP1" source="67404" target="67366" cy:directed="1"/>
      <edge id="81235" label="RFX2 (GRN) GRIN3B" source="67404" target="67365" cy:directed="1"/>
      <edge id="81234" label="RFX2 (GRN) C9orf117" source="67404" target="67364" cy:directed="1"/>
      <edge id="81233" label="RFX2 (GRN) DNAH10" source="67404" target="67363" cy:directed="1"/>
      <edge id="81232" label="RFX2 (GRN) CDHR3" source="67404" target="67350" cy:directed="1"/>
      <edge id="81231" label="RFX2 (GRN) FAM166B" source="67404" target="67362" cy:directed="1"/>
      <edge id="81230" label="RFX2 (GRN) FANK1" source="67404" target="67361" cy:directed="1"/>
      <edge id="81229" label="RFX2 (GRN) C4orf47" source="67404" target="67360" cy:directed="1"/>
      <edge id="81228" label="RFX2 (GRN) ARHGAP39" source="67404" target="67359" cy:directed="1"/>
      <edge id="81227" label="RFX2 (GRN) PPIL6" source="67404" target="67358" cy:directed="1"/>
      <edge id="81226" label="RFX2 (GRN) C3orf67" source="67404" target="67357" cy:directed="1"/>
      <edge id="81225" label="RFX2 (GRN) SPAG8" source="67404" target="67356" cy:directed="1"/>
      <edge id="81224" label="RFX2 (GRN) KLHL32" source="67404" target="67355" cy:directed="1"/>
      <edge id="81223" label="RFX2 (GRN) CCDC180" source="67404" target="67354" cy:directed="1"/>
      <edge id="81222" label="RFX2 (GRN) C22orf15" source="67404" target="67353" cy:directed="1"/>
      <edge id="81221" label="RFX2 (GRN) PIH1D2" source="67404" target="67309" cy:directed="1"/>
      <edge id="81220" label="RFX2 (GRN) CETN2" source="67404" target="67352" cy:directed="1"/>
      <edge id="81219" label="RFX2 (GRN) MAK" source="67404" target="67351" cy:directed="1"/>
      <edge id="81218" label="RFX2 (GRN) ROPN1L" source="67404" target="67349" cy:directed="1"/>
      <edge id="81217" label="RFX2 (GRN) TSPAN1" source="67404" target="67348" cy:directed="1"/>
      <edge id="81216" label="RFX2 (GRN) CCNO" source="67404" target="67347" cy:directed="1"/>
      <edge id="81215" label="RFX2 (GRN) C1orf192" source="67404" target="67308" cy:directed="1"/>
      <edge id="81214" label="RFX2 (GRN) LRRC23" source="67404" target="67346" cy:directed="1"/>
      <edge id="81213" label="RFX2 (GRN) LRRC48" source="67404" target="67307" cy:directed="1"/>
      <edge id="81212" label="RFX2 (GRN) SPEF1" source="67404" target="67345" cy:directed="1"/>
      <edge id="81211" label="RFX2 (GRN) ZMYND10" source="67404" target="67344" cy:directed="1"/>
      <edge id="81210" label="RFX2 (GRN) WDR66" source="67404" target="67343" cy:directed="1"/>
      <edge id="81209" label="RFX2 (GRN) TP73" source="67404" target="67342" cy:directed="1"/>
      <edge id="81208" label="CP (GCN) E2F8" source="67403" target="67397" cy:directed="1"/>
      <edge id="81207" label="DZIP1L (GCN) LRRC46" source="67402" target="67310" cy:directed="1"/>
      <edge id="81206" label="EPN3 (GCN) CCDC114" source="67401" target="67373" cy:directed="1"/>
      <edge id="81205" label="EPN3 (GCN) CD164L2" source="67401" target="67936" cy:directed="1"/>
      <edge id="81204" label="EPN3 (GCN) CCDC74B" source="67401" target="67970" cy:directed="1"/>
      <edge id="81203" label="FAM227A (GCN) E2F8" source="67400" target="67397" cy:directed="1"/>
      <edge id="81202" label="FAM227A (GCN) PPAP2C" source="67400" target="67368" cy:directed="1"/>
      <edge id="81201" label="CCDC13 (GCN) ESPN" source="67399" target="67933" cy:directed="1"/>
      <edge id="81200" label="SLC52A1 (GCN) EPN3" source="67398" target="67401" cy:directed="1"/>
      <edge id="81199" label="E2F8 (GCN) CENPM" source="67397" target="67274" cy:directed="1"/>
      <edge id="81198" label="E2F8 (GCN) KIF24" source="67397" target="67930" cy:directed="1"/>
      <edge id="81197" label="NGEF (GCN) NEK10" source="67396" target="67974" cy:directed="1"/>
      <edge id="81196" label="NGEF (GCN) DNAAF1" source="67396" target="67386" cy:directed="1"/>
      <edge id="81195" label="NGEF (GCN) TMEM232" source="67396" target="67972" cy:directed="1"/>
      <edge id="81194" label="NGEF (GCN) CCDC74B" source="67396" target="67970" cy:directed="1"/>
      <edge id="81193" label="NGEF (GCN) CD164L2" source="67396" target="67936" cy:directed="1"/>
      <edge id="81192" label="NGEF (GCN) UBXN10" source="67396" target="67967" cy:directed="1"/>
      <edge id="81191" label="NGEF (GCN) C16orf71" source="67396" target="67960" cy:directed="1"/>
      <edge id="81190" label="RABL5 (GCN) LRRC46" source="67395" target="67310" cy:directed="1"/>
      <edge id="81189" label="SRCIN1 (GCN) C1orf192" source="67394" target="67308" cy:directed="1"/>
      <edge id="81188" label="PVRL4 (GCN) TJP3" source="67393" target="67985" cy:directed="1"/>
      <edge id="81187" label="PVRL4 (GCN) CDS1" source="67393" target="67975" cy:directed="1"/>
      <edge id="81186" label="PVRL4 (GCN) PPP1R14C" source="67393" target="67137" cy:directed="1"/>
      <edge id="81185" label="PVRL4 (GCN) CDH26" source="67393" target="67956" cy:directed="1"/>
      <edge id="81184" label="CCDC74A (GCN) SIX4" source="67392" target="67406" cy:directed="1"/>
      <edge id="81183" label="CCDC74A (GCN) PPAP2C" source="67392" target="67368" cy:directed="1"/>
      <edge id="81182" label="IFT46 (GCN) LRRC46" source="67391" target="67310" cy:directed="1"/>
      <edge id="81181" label="OTX1 (GCN) RTDR1" source="67390" target="67973" cy:directed="1"/>
      <edge id="81180" label="OTX1 (GCN) ACSBG1" source="67390" target="67963" cy:directed="1"/>
      <edge id="81179" label="OTX1 (GCN) MAK" source="67390" target="67351" cy:directed="1"/>
      <edge id="81178" label="OTX1 (GCN) DTHD1" source="67390" target="67961" cy:directed="1"/>
      <edge id="81177" label="OTX1 (GCN) IQUB" source="67390" target="67959" cy:directed="1"/>
      <edge id="81176" label="OTX1 (GCN) PACRG" source="67390" target="67957" cy:directed="1"/>
      <edge id="81175" label="OTX1 (GCN) C22orf15" source="67390" target="67353" cy:directed="1"/>
      <edge id="81174" label="OTX1 (GCN) C9orf24" source="67390" target="67928" cy:directed="1"/>
      <edge id="81173" label="OTX1 (GCN) C20orf26" source="67390" target="67955" cy:directed="1"/>
      <edge id="81172" label="OTX1 (GCN) SPEF1" source="67390" target="67345" cy:directed="1"/>
      <edge id="81171" label="OTX1 (GCN) ZNF474" source="67390" target="67950" cy:directed="1"/>
      <edge id="81170" label="OTX1 (GCN) ENKUR" source="67390" target="67949" cy:directed="1"/>
      <edge id="81169" label="TCTEX1D1 (GCN) ESPN" source="67389" target="67933" cy:directed="1"/>
      <edge id="81168" label="TIGD4 (GCN) C22orf15" source="67388" target="67353" cy:directed="1"/>
      <edge id="81167" label="C17orf72 (GCN) SIX1" source="67387" target="67374" cy:directed="1"/>
      <edge id="81166" label="C17orf72 (GCN) ESPN" source="67387" target="67933" cy:directed="1"/>
      <edge id="81165" label="DNAAF1 (GCN) SIX1" source="67386" target="67374" cy:directed="1"/>
      <edge id="81164" label="DENND6B (GCN) PPAP2C" source="67385" target="67368" cy:directed="1"/>
      <edge id="81163" label="DENND6B (GCN) LRRC46" source="67385" target="67310" cy:directed="1"/>
      <edge id="81162" label="TSNAXIP1 (GCN) IGSF9" source="67384" target="67409" cy:directed="1"/>
      <edge id="81161" label="TSNAXIP1 (GCN) SIX4" source="67384" target="67406" cy:directed="1"/>
      <edge id="81160" label="TSNAXIP1 (GCN) PPAP2C" source="67384" target="67368" cy:directed="1"/>
      <edge id="81159" label="IRF6 (GCN) ZMYND10" source="67383" target="67344" cy:directed="1"/>
      <edge id="81158" label="PAX9 (GCN) CCDC65" source="67382" target="67934" cy:directed="1"/>
      <edge id="81157" label="PPP1R32 (GCN) ESPN" source="67381" target="67933" cy:directed="1"/>
      <edge id="81156" label="PPP1R32 (GCN) SIX1" source="67381" target="67374" cy:directed="1"/>
      <edge id="81155" label="RAB36 (GCN) SIX4" source="67380" target="67406" cy:directed="1"/>
      <edge id="81154" label="RAB36 (GCN) IGSF9" source="67380" target="67409" cy:directed="1"/>
      <edge id="81153" label="RAB36 (GCN) PPAP2C" source="67380" target="67368" cy:directed="1"/>
      <edge id="81152" label="RAB36 (GCN) CCDC65" source="67380" target="67934" cy:directed="1"/>
      <edge id="81151" label="RIBC1 (GCN) SIX4" source="67379" target="67406" cy:directed="1"/>
      <edge id="81150" label="RIBC1 (GCN) SIX1" source="67379" target="67374" cy:directed="1"/>
      <edge id="81149" label="ADGB (GCN) ARX" source="67378" target="67942" cy:directed="1"/>
      <edge id="81148" label="WDR16 (GCN) TTC23L" source="67377" target="67945" cy:directed="1"/>
      <edge id="81147" label="WDR16 (GCN) TIGD4" source="67377" target="67388" cy:directed="1"/>
      <edge id="81146" label="CCDC151 (GCN) NGEF" source="67376" target="67396" cy:directed="1"/>
      <edge id="81145" label="CCDC151 (GCN) RHOV" source="67376" target="67369" cy:directed="1"/>
      <edge id="81144" label="FAM154B (GCN) RHOV" source="67375" target="67369" cy:directed="1"/>
      <edge id="81143" label="FAM154B (GCN) SIX1" source="67375" target="67374" cy:directed="1"/>
      <edge id="81142" label="FAM154B (GCN) PAX9" source="67375" target="67382" cy:directed="1"/>
      <edge id="81141" label="SIX1 (GCN) TCTEX1D1" source="67374" target="67389" cy:directed="1"/>
      <edge id="81140" label="SIX1 (GCN) CCDC13" source="67374" target="67399" cy:directed="1"/>
      <edge id="81139" label="SIX1 (GCN) RSPH9" source="67374" target="67937" cy:directed="1"/>
      <edge id="81138" label="SIX1 (GCN) EFCAB10" source="67374" target="67943" cy:directed="1"/>
      <edge id="81137" label="SIX1 (GCN) SPATA18" source="67374" target="67926" cy:directed="1"/>
      <edge id="81136" label="SIX1 (GCN) TMEM231" source="67374" target="67939" cy:directed="1"/>
      <edge id="81135" label="SIX1 (GCN) LRRC46" source="67374" target="67310" cy:directed="1"/>
      <edge id="81134" label="SIX1 (GCN) C9orf116" source="67374" target="67938" cy:directed="1"/>
      <edge id="81133" label="CCDC114 (GCN) TCTEX1D1" source="67373" target="67389" cy:directed="1"/>
      <edge id="81132" label="CCDC114 (GCN) SIX1" source="67373" target="67374" cy:directed="1"/>
      <edge id="81131" label="FHAD1 (GCN) TSPAN1" source="67372" target="67348" cy:directed="1"/>
      <edge id="81130" label="WDR96 (GCN) LPAR3" source="67371" target="67986" cy:directed="1"/>
      <edge id="81129" label="WDR96 (GCN) NGEF" source="67371" target="67396" cy:directed="1"/>
      <edge id="81128" label="WDR96 (GCN) PRR15" source="67371" target="67951" cy:directed="1"/>
      <edge id="81127" label="WDR96 (GCN) TCTEX1D1" source="67371" target="67389" cy:directed="1"/>
      <edge id="81126" label="MDH1B (GCN) NGEF" source="67370" target="67396" cy:directed="1"/>
      <edge id="81125" label="MDH1B (GCN) RHOV" source="67370" target="67369" cy:directed="1"/>
      <edge id="81124" label="RHOV (GCN) EFCAB10" source="67369" target="67943" cy:directed="1"/>
      <edge id="81123" label="RHOV (GCN) CCDC13" source="67369" target="67399" cy:directed="1"/>
      <edge id="81122" label="RHOV (GCN) CCDC114" source="67369" target="67373" cy:directed="1"/>
      <edge id="81121" label="RHOV (GCN) DNAAF1" source="67369" target="67386" cy:directed="1"/>
      <edge id="81120" label="RHOV (GCN) CD164L2" source="67369" target="67936" cy:directed="1"/>
      <edge id="81119" label="PPAP2C (GCN) C10orf95" source="67368" target="67405" cy:directed="1"/>
      <edge id="81118" label="PPAP2C (GCN) WDR66" source="67368" target="67343" cy:directed="1"/>
      <edge id="81117" label="PPAP2C (GCN) DNALI1" source="67368" target="67312" cy:directed="1"/>
      <edge id="81116" label="PPAP2C (GCN) AK8" source="67368" target="67311" cy:directed="1"/>
      <edge id="81115" label="PPAP2C (GCN) OSCP1" source="67368" target="67966" cy:directed="1"/>
      <edge id="81114" label="PPAP2C (GCN) WDR54" source="67368" target="67367" cy:directed="1"/>
      <edge id="81113" label="PPAP2C (GCN) KIF9" source="67368" target="67962" cy:directed="1"/>
      <edge id="81112" label="PPAP2C (GCN) TSPAN1" source="67368" target="67348" cy:directed="1"/>
      <edge id="81111" label="PPAP2C (GCN) CCDC13" source="67368" target="67399" cy:directed="1"/>
      <edge id="81110" label="PPAP2C (GCN) C17orf72" source="67368" target="67387" cy:directed="1"/>
      <edge id="81109" label="PPAP2C (GCN) SPA17" source="67368" target="67410" cy:directed="1"/>
      <edge id="81108" label="PPAP2C (GCN) CCDC113" source="67368" target="67954" cy:directed="1"/>
      <edge id="81107" label="PPAP2C (GCN) TTC18" source="67368" target="67952" cy:directed="1"/>
      <edge id="81106" label="PPAP2C (GCN) FHAD1" source="67368" target="67372" cy:directed="1"/>
      <edge id="81105" label="PPAP2C (GCN) SPATA18" source="67368" target="67926" cy:directed="1"/>
      <edge id="81104" label="PPAP2C (GCN) PPP1R32" source="67368" target="67381" cy:directed="1"/>
      <edge id="81103" label="PPAP2C (GCN) CCDC65" source="67368" target="67934" cy:directed="1"/>
      <edge id="81102" label="PPAP2C (GCN) PIH1D2" source="67368" target="67309" cy:directed="1"/>
      <edge id="81101" label="PPAP2C (GCN) C9orf9" source="67368" target="67947" cy:directed="1"/>
      <edge id="81100" label="PPAP2C (GCN) LRRC23" source="67368" target="67346" cy:directed="1"/>
      <edge id="81099" label="PPAP2C (GCN) TMEM231" source="67368" target="67939" cy:directed="1"/>
      <edge id="81098" label="PPAP2C (GCN) CCDC153" source="67368" target="67946" cy:directed="1"/>
      <edge id="81097" label="PPAP2C (GCN) RIBC1" source="67368" target="67379" cy:directed="1"/>
      <edge id="81096" label="PPAP2C (GCN) RSPH9" source="67368" target="67937" cy:directed="1"/>
      <edge id="81095" label="PPAP2C (GCN) LRRC46" source="67368" target="67310" cy:directed="1"/>
      <edge id="81094" label="WDR54 (GCN) LRRC46" source="67367" target="67310" cy:directed="1"/>
      <edge id="81093" label="NPHP1 (GCN) LRRC46" source="67366" target="67310" cy:directed="1"/>
      <edge id="81092" label="NPHP1 (GCN) CCDC65" source="67366" target="67934" cy:directed="1"/>
      <edge id="81091" label="GRIN3B (GCN) NEK5" source="67365" target="67935" cy:directed="1"/>
      <edge id="81090" label="C9orf117 (GCN) SIX4" source="67364" target="67406" cy:directed="1"/>
      <edge id="81089" label="C9orf117 (GCN) KIF24" source="67364" target="67930" cy:directed="1"/>
      <edge id="81088" label="C9orf117 (GCN) ZNF273" source="67364" target="67948" cy:directed="1"/>
      <edge id="81087" label="C9orf117 (GCN) ARHGAP39" source="67364" target="67359" cy:directed="1"/>
      <edge id="81086" label="C9orf117 (GCN) C16orf93" source="67364" target="67941" cy:directed="1"/>
      <edge id="81085" label="C9orf117 (GCN) PPAP2C" source="67364" target="67368" cy:directed="1"/>
      <edge id="81084" label="C9orf117 (GCN) WDR66" source="67364" target="67343" cy:directed="1"/>
      <edge id="81083" label="DNAH10 (GCN) CCNO" source="67363" target="67347" cy:directed="1"/>
      <edge id="81082" label="FAM166B (GCN) EPN3" source="67362" target="67401" cy:directed="1"/>
      <edge id="81081" label="FAM166B (GCN) NGEF" source="67362" target="67396" cy:directed="1"/>
      <edge id="81080" label="FAM166B (GCN) RHOV" source="67362" target="67369" cy:directed="1"/>
      <edge id="81079" label="FANK1 (GCN) IGSF9" source="67361" target="67409" cy:directed="1"/>
      <edge id="81078" label="FANK1 (GCN) SIX4" source="67361" target="67406" cy:directed="1"/>
      <edge id="81077" label="FANK1 (GCN) PPAP2C" source="67361" target="67368" cy:directed="1"/>
      <edge id="81076" label="FANK1 (GCN) CCDC65" source="67361" target="67934" cy:directed="1"/>
      <edge id="81075" label="FANK1 (GCN) LRRC46" source="67361" target="67310" cy:directed="1"/>
      <edge id="81074" label="C4orf47 (GCN) CCDC65" source="67360" target="67934" cy:directed="1"/>
      <edge id="81073" label="ARHGAP39 (GCN) LRRC46" source="67359" target="67310" cy:directed="1"/>
      <edge id="81072" label="PPIL6 (GCN) SIX4" source="67358" target="67406" cy:directed="1"/>
      <edge id="81071" label="PPIL6 (GCN) PPAP2C" source="67358" target="67368" cy:directed="1"/>
      <edge id="81070" label="PPIL6 (GCN) SIX1" source="67358" target="67374" cy:directed="1"/>
      <edge id="81069" label="PPIL6 (GCN) CCDC65" source="67358" target="67934" cy:directed="1"/>
      <edge id="81068" label="C3orf67 (GCN) EPN3" source="67357" target="67401" cy:directed="1"/>
      <edge id="81067" label="C3orf67 (GCN) WDR96" source="67357" target="67371" cy:directed="1"/>
      <edge id="81066" label="C3orf67 (GCN) CCDC170" source="67357" target="67940" cy:directed="1"/>
      <edge id="81065" label="C3orf67 (GCN) FAM166B" source="67357" target="67362" cy:directed="1"/>
      <edge id="81064" label="C3orf67 (GCN) FAM154B" source="67357" target="67375" cy:directed="1"/>
      <edge id="81063" label="C3orf67 (GCN) ROPN1L" source="67357" target="67349" cy:directed="1"/>
      <edge id="81062" label="SPAG8 (GCN) SIX4" source="67356" target="67406" cy:directed="1"/>
      <edge id="81061" label="SPAG8 (GCN) SIX1" source="67356" target="67374" cy:directed="1"/>
      <edge id="81060" label="SPAG8 (GCN) RHOV" source="67356" target="67369" cy:directed="1"/>
      <edge id="81059" label="SPAG8 (GCN) PPAP2C" source="67356" target="67368" cy:directed="1"/>
      <edge id="81058" label="SPAG8 (GCN) ESPN" source="67356" target="67933" cy:directed="1"/>
      <edge id="81057" label="KLHL32 (GCN) DRC1" source="67355" target="67932" cy:directed="1"/>
      <edge id="81056" label="CCDC180 (GCN) PPAP2C" source="67354" target="67368" cy:directed="1"/>
      <edge id="81055" label="CCDC180 (GCN) LRRC46" source="67354" target="67310" cy:directed="1"/>
      <edge id="81054" label="CCDC180 (GCN) ZMYND10" source="67354" target="67344" cy:directed="1"/>
      <edge id="81053" label="CCDC180 (GCN) CDHR3" source="67354" target="67350" cy:directed="1"/>
      <edge id="81052" label="C22orf15 (GCN) MAT1A" source="67353" target="67944" cy:directed="1"/>
      <edge id="81051" label="C22orf15 (GCN) C8orf47" source="67353" target="67929" cy:directed="1"/>
      <edge id="81050" label="CETN2 (GCN) LRRC48" source="67352" target="67307" cy:directed="1"/>
      <edge id="81049" label="CETN2 (GCN) CCDC65" source="67352" target="67934" cy:directed="1"/>
      <edge id="81048" label="CETN2 (GCN) LRRC46" source="67352" target="67310" cy:directed="1"/>
      <edge id="81047" label="MAK (GCN) C9orf24" source="67351" target="67928" cy:directed="1"/>
      <edge id="81046" label="CDHR3 (GCN) CENPM" source="67350" target="67274" cy:directed="1"/>
      <edge id="81045" label="CDHR3 (GCN) SIX4" source="67350" target="67406" cy:directed="1"/>
      <edge id="81044" label="CDHR3 (GCN) CCDC113" source="67350" target="67954" cy:directed="1"/>
      <edge id="81043" label="CDHR3 (GCN) DENND6B" source="67350" target="67385" cy:directed="1"/>
      <edge id="81042" label="CDHR3 (GCN) PIH1D2" source="67350" target="67309" cy:directed="1"/>
      <edge id="81041" label="CDHR3 (GCN) C4orf47" source="67350" target="67360" cy:directed="1"/>
      <edge id="81040" label="CDHR3 (GCN) TMEM231" source="67350" target="67939" cy:directed="1"/>
      <edge id="81039" label="CDHR3 (GCN) NPHP1" source="67350" target="67366" cy:directed="1"/>
      <edge id="81038" label="CDHR3 (GCN) ESPN" source="67350" target="67933" cy:directed="1"/>
      <edge id="81037" label="CDHR3 (GCN) PPAP2C" source="67350" target="67368" cy:directed="1"/>
      <edge id="81036" label="CDHR3 (GCN) PAX9" source="67350" target="67382" cy:directed="1"/>
      <edge id="81035" label="CDHR3 (GCN) SIX1" source="67350" target="67374" cy:directed="1"/>
      <edge id="81034" label="CDHR3 (GCN) PPIL6" source="67350" target="67358" cy:directed="1"/>
      <edge id="81033" label="CDHR3 (GCN) RAB36" source="67350" target="67380" cy:directed="1"/>
      <edge id="81032" label="CDHR3 (GCN) CCDC74A" source="67350" target="67392" cy:directed="1"/>
      <edge id="81031" label="ROPN1L (GCN) NGEF" source="67349" target="67396" cy:directed="1"/>
      <edge id="81030" label="ROPN1L (GCN) RHOV" source="67349" target="67369" cy:directed="1"/>
      <edge id="81029" label="TSPAN1 (GCN) LRRC46" source="67348" target="67310" cy:directed="1"/>
      <edge id="81028" label="CCNO (GCN) EFCAB12" source="67347" target="67927" cy:directed="1"/>
      <edge id="81027" label="LRRC23 (GCN) SIX1" source="67346" target="67374" cy:directed="1"/>
      <edge id="81026" label="LRRC23 (GCN) LRRC46" source="67346" target="67310" cy:directed="1"/>
      <edge id="81025" label="SPEF1 (GCN) DNAH10" source="67345" target="67363" cy:directed="1"/>
      <edge id="81024" label="ZMYND10 (GCN) CENPM" source="67344" target="67274" cy:directed="1"/>
      <edge id="81023" label="ZMYND10 (GCN) IGSF9" source="67344" target="67409" cy:directed="1"/>
      <edge id="81022" label="ZMYND10 (GCN) SIX4" source="67344" target="67406" cy:directed="1"/>
      <edge id="81021" label="ZMYND10 (GCN) IFT46" source="67344" target="67391" cy:directed="1"/>
      <edge id="81020" label="ZMYND10 (GCN) SIX1" source="67344" target="67374" cy:directed="1"/>
      <edge id="81019" label="ZMYND10 (GCN) PPAP2C" source="67344" target="67368" cy:directed="1"/>
      <edge id="81018" label="ZMYND10 (GCN) MOK" source="67344" target="67931" cy:directed="1"/>
      <edge id="81017" label="ZMYND10 (GCN) TSPAN1" source="67344" target="67348" cy:directed="1"/>
      <edge id="81016" label="ZMYND10 (GCN) WDR66" source="67344" target="67343" cy:directed="1"/>
      <edge id="81015" label="WDR66 (GCN) SPATA18" source="67343" target="67926" cy:directed="1"/>
      <edge id="81014" label="TP73 (GCN) SIX4" source="67342" target="67406" cy:directed="1"/>
      <edge id="81013" label="TP73 (GCN) IGSF9" source="67342" target="67409" cy:directed="1"/>
      <edge id="81012" label="TP73 (GCN) PPAP2C" source="67342" target="67368" cy:directed="1"/>
      <edge id="81011" label="TP73 (GCN) ZMYND10" source="67342" target="67344" cy:directed="1"/>
      <edge id="81010" label="MXI1 (GRN) NEK10" source="67341" target="67974" cy:directed="1"/>
      <edge id="81009" label="MXI1 (GRN) C11orf70" source="67341" target="67887" cy:directed="1"/>
      <edge id="81008" label="MXI1 (GRN) RTDR1" source="67341" target="67973" cy:directed="1"/>
      <edge id="81007" label="MXI1 (GRN) TMEM232" source="67341" target="67972" cy:directed="1"/>
      <edge id="81006" label="MXI1 (GRN) IQCC" source="67341" target="67971" cy:directed="1"/>
      <edge id="81005" label="MXI1 (GRN) CCDC74B" source="67341" target="67970" cy:directed="1"/>
      <edge id="81004" label="MXI1 (GRN) SLC27A2" source="67341" target="67969" cy:directed="1"/>
      <edge id="81003" label="MXI1 (GRN) EFCAB11" source="67341" target="67968" cy:directed="1"/>
      <edge id="81002" label="MXI1 (GRN) UBXN10" source="67341" target="67967" cy:directed="1"/>
      <edge id="81001" label="MXI1 (GRN) OSCP1" source="67341" target="67966" cy:directed="1"/>
      <edge id="81000" label="MXI1 (GRN) CCDC24" source="67341" target="67411" cy:directed="1"/>
      <edge id="80999" label="MXI1 (GRN) AK7" source="67341" target="67965" cy:directed="1"/>
      <edge id="80998" label="MXI1 (GRN) ZMYND12" source="67341" target="67964" cy:directed="1"/>
      <edge id="80997" label="MXI1 (GRN) ACSBG1" source="67341" target="67963" cy:directed="1"/>
      <edge id="80996" label="MXI1 (GRN) GYG2" source="67341" target="67880" cy:directed="1"/>
      <edge id="80995" label="MXI1 (GRN) KIF9" source="67341" target="67962" cy:directed="1"/>
      <edge id="80994" label="MXI1 (GRN) ANKRD54" source="67341" target="67909" cy:directed="1"/>
      <edge id="80993" label="MXI1 (GRN) SLC44A4" source="67341" target="67413" cy:directed="1"/>
      <edge id="80992" label="MXI1 (GRN) DTHD1" source="67341" target="67961" cy:directed="1"/>
      <edge id="80991" label="MXI1 (GRN) C16orf71" source="67341" target="67960" cy:directed="1"/>
      <edge id="80990" label="MXI1 (GRN) HN1L" source="67341" target="67512" cy:directed="1"/>
      <edge id="80989" label="MXI1 (GRN) IQUB" source="67341" target="67959" cy:directed="1"/>
      <edge id="80988" label="MXI1 (GRN) ZDHHC13" source="67341" target="67958" cy:directed="1"/>
      <edge id="80987" label="MXI1 (GRN) PACRG" source="67341" target="67957" cy:directed="1"/>
      <edge id="80986" label="MXI1 (GRN) CDH26" source="67341" target="67956" cy:directed="1"/>
      <edge id="80985" label="MXI1 (GRN) SPA17" source="67341" target="67410" cy:directed="1"/>
      <edge id="80984" label="MXI1 (GRN) C20orf26" source="67341" target="67955" cy:directed="1"/>
      <edge id="80983" label="MXI1 (GRN) CCDC113" source="67341" target="67954" cy:directed="1"/>
      <edge id="80982" label="MXI1 (GRN) RPGRIP1L" source="67341" target="67953" cy:directed="1"/>
      <edge id="80981" label="MXI1 (GRN) TTC18" source="67341" target="67952" cy:directed="1"/>
      <edge id="80980" label="MXI1 (GRN) PRR15" source="67341" target="67951" cy:directed="1"/>
      <edge id="80979" label="MXI1 (GRN) ZNF474" source="67341" target="67950" cy:directed="1"/>
      <edge id="80978" label="MXI1 (GRN) ENKUR" source="67341" target="67949" cy:directed="1"/>
      <edge id="80977" label="MXI1 (GRN) ZNF273" source="67341" target="67948" cy:directed="1"/>
      <edge id="80976" label="MXI1 (GRN) C9orf9" source="67341" target="67947" cy:directed="1"/>
      <edge id="80975" label="MXI1 (GRN) CCDC153" source="67341" target="67946" cy:directed="1"/>
      <edge id="80974" label="MXI1 (GRN) TTC23L" source="67341" target="67945" cy:directed="1"/>
      <edge id="80973" label="MXI1 (GRN) MAT1A" source="67341" target="67944" cy:directed="1"/>
      <edge id="80972" label="MXI1 (GRN) EFCAB10" source="67341" target="67943" cy:directed="1"/>
      <edge id="80971" label="MXI1 (GRN) ARX" source="67341" target="67942" cy:directed="1"/>
      <edge id="80970" label="MXI1 (GRN) C16orf93" source="67341" target="67941" cy:directed="1"/>
      <edge id="80969" label="MXI1 (GRN) CCDC170" source="67341" target="67940" cy:directed="1"/>
      <edge id="80968" label="MXI1 (GRN) TMEM231" source="67341" target="67939" cy:directed="1"/>
      <edge id="80967" label="MXI1 (GRN) RABL2B" source="67341" target="67908" cy:directed="1"/>
      <edge id="80966" label="MXI1 (GRN) C9orf116" source="67341" target="67938" cy:directed="1"/>
      <edge id="80965" label="MXI1 (GRN) RSPH9" source="67341" target="67937" cy:directed="1"/>
      <edge id="80964" label="MXI1 (GRN) CD164L2" source="67341" target="67936" cy:directed="1"/>
      <edge id="80963" label="MXI1 (GRN) NEK5" source="67341" target="67935" cy:directed="1"/>
      <edge id="80962" label="MXI1 (GRN) CCDC65" source="67341" target="67934" cy:directed="1"/>
      <edge id="80961" label="MXI1 (GRN) ESPN" source="67341" target="67933" cy:directed="1"/>
      <edge id="80960" label="MXI1 (GRN) DRC1" source="67341" target="67932" cy:directed="1"/>
      <edge id="80959" label="MXI1 (GRN) MOK" source="67341" target="67931" cy:directed="1"/>
      <edge id="80958" label="MXI1 (GRN) KIF24" source="67341" target="67930" cy:directed="1"/>
      <edge id="80957" label="MXI1 (GRN) C8orf47" source="67341" target="67929" cy:directed="1"/>
      <edge id="80956" label="MXI1 (GRN) C9orf24" source="67341" target="67928" cy:directed="1"/>
      <edge id="80955" label="MXI1 (GRN) EFCAB12" source="67341" target="67927" cy:directed="1"/>
      <edge id="80954" label="MXI1 (GRN) SPATA18" source="67341" target="67926" cy:directed="1"/>
      <edge id="80953" label="MXI1 (GRN) CP" source="67341" target="67403" cy:directed="1"/>
      <edge id="80952" label="MXI1 (GRN) DZIP1L" source="67341" target="67402" cy:directed="1"/>
      <edge id="80951" label="MXI1 (GRN) EPN3" source="67341" target="67401" cy:directed="1"/>
      <edge id="80950" label="MXI1 (GRN) FAM227A" source="67341" target="67400" cy:directed="1"/>
      <edge id="80949" label="MXI1 (GRN) CCDC13" source="67341" target="67399" cy:directed="1"/>
      <edge id="80948" label="MXI1 (GRN) SLC52A1" source="67341" target="67398" cy:directed="1"/>
      <edge id="80947" label="MXI1 (GRN) E2F8" source="67341" target="67397" cy:directed="1"/>
      <edge id="80946" label="MXI1 (GRN) HMGB3" source="67341" target="67240" cy:directed="1"/>
      <edge id="80945" label="MXI1 (GRN) NGEF" source="67341" target="67396" cy:directed="1"/>
      <edge id="80944" label="MXI1 (GRN) RABL5" source="67341" target="67395" cy:directed="1"/>
      <edge id="80943" label="MXI1 (GRN) SRCIN1" source="67341" target="67394" cy:directed="1"/>
      <edge id="80942" label="MXI1 (GRN) PVRL4" source="67341" target="67393" cy:directed="1"/>
      <edge id="80941" label="MXI1 (GRN) CCDC74A" source="67341" target="67392" cy:directed="1"/>
      <edge id="80940" label="MXI1 (GRN) IFT46" source="67341" target="67391" cy:directed="1"/>
      <edge id="80939" label="MXI1 (GRN) TRIP13" source="67341" target="66606" cy:directed="1"/>
      <edge id="80938" label="MXI1 (GRN) DNALI1" source="67341" target="67312" cy:directed="1"/>
      <edge id="80937" label="MXI1 (GRN) OTX1" source="67341" target="67390" cy:directed="1"/>
      <edge id="80936" label="MXI1 (GRN) TCTEX1D1" source="67341" target="67389" cy:directed="1"/>
      <edge id="80935" label="MXI1 (GRN) TIGD4" source="67341" target="67388" cy:directed="1"/>
      <edge id="80934" label="MXI1 (GRN) C17orf72" source="67341" target="67387" cy:directed="1"/>
      <edge id="80933" label="MXI1 (GRN) AK8" source="67341" target="67311" cy:directed="1"/>
      <edge id="80932" label="MXI1 (GRN) DNAAF1" source="67341" target="67386" cy:directed="1"/>
      <edge id="80931" label="MXI1 (GRN) DENND6B" source="67341" target="67385" cy:directed="1"/>
      <edge id="80930" label="MXI1 (GRN) TSNAXIP1" source="67341" target="67384" cy:directed="1"/>
      <edge id="80929" label="MXI1 (GRN) IRF6" source="67341" target="67383" cy:directed="1"/>
      <edge id="80928" label="MXI1 (GRN) PAX9" source="67341" target="67382" cy:directed="1"/>
      <edge id="80927" label="MXI1 (GRN) PPP1R32" source="67341" target="67381" cy:directed="1"/>
      <edge id="80926" label="MXI1 (GRN) RAB36" source="67341" target="67380" cy:directed="1"/>
      <edge id="80925" label="MXI1 (GRN) RIBC1" source="67341" target="67379" cy:directed="1"/>
      <edge id="80924" label="MXI1 (GRN) ADGB" source="67341" target="67378" cy:directed="1"/>
      <edge id="80923" label="MXI1 (GRN) WDR16" source="67341" target="67377" cy:directed="1"/>
      <edge id="80922" label="MXI1 (GRN) CCDC151" source="67341" target="67376" cy:directed="1"/>
      <edge id="80921" label="MXI1 (GRN) LRRC46" source="67341" target="67310" cy:directed="1"/>
      <edge id="80920" label="MXI1 (GRN) FAM154B" source="67341" target="67375" cy:directed="1"/>
      <edge id="80919" label="MXI1 (GRN) SIX1" source="67341" target="67374" cy:directed="1"/>
      <edge id="80918" label="MXI1 (GRN) CCDC114" source="67341" target="67373" cy:directed="1"/>
      <edge id="80917" label="MXI1 (GRN) FHAD1" source="67341" target="67372" cy:directed="1"/>
      <edge id="80916" label="MXI1 (GRN) WDR96" source="67341" target="67371" cy:directed="1"/>
      <edge id="80915" label="MXI1 (GRN) MDH1B" source="67341" target="67370" cy:directed="1"/>
      <edge id="80914" label="MXI1 (GRN) RHOV" source="67341" target="67369" cy:directed="1"/>
      <edge id="80913" label="MXI1 (GRN) PPAP2C" source="67341" target="67368" cy:directed="1"/>
      <edge id="80912" label="MXI1 (GRN) WDR54" source="67341" target="67367" cy:directed="1"/>
      <edge id="80911" label="MXI1 (GRN) NPHP1" source="67341" target="67366" cy:directed="1"/>
      <edge id="80910" label="MXI1 (GRN) GRIN3B" source="67341" target="67365" cy:directed="1"/>
      <edge id="80909" label="MXI1 (GRN) C9orf117" source="67341" target="67364" cy:directed="1"/>
      <edge id="80908" label="MXI1 (GRN) DNAH10" source="67341" target="67363" cy:directed="1"/>
      <edge id="80907" label="MXI1 (GRN) FAM166B" source="67341" target="67362" cy:directed="1"/>
      <edge id="80906" label="MXI1 (GRN) FANK1" source="67341" target="67361" cy:directed="1"/>
      <edge id="80905" label="MXI1 (GRN) C4orf47" source="67341" target="67360" cy:directed="1"/>
      <edge id="80904" label="MXI1 (GRN) ARHGAP39" source="67341" target="67359" cy:directed="1"/>
      <edge id="80903" label="MXI1 (GRN) PPIL6" source="67341" target="67358" cy:directed="1"/>
      <edge id="80902" label="MXI1 (GRN) C3orf67" source="67341" target="67357" cy:directed="1"/>
      <edge id="80901" label="MXI1 (GRN) SPAG8" source="67341" target="67356" cy:directed="1"/>
      <edge id="80900" label="MXI1 (GRN) KLHL32" source="67341" target="67355" cy:directed="1"/>
      <edge id="80899" label="MXI1 (GRN) CCDC180" source="67341" target="67354" cy:directed="1"/>
      <edge id="80898" label="MXI1 (GRN) C22orf15" source="67341" target="67353" cy:directed="1"/>
      <edge id="80897" label="MXI1 (GRN) PIH1D2" source="67341" target="67309" cy:directed="1"/>
      <edge id="80896" label="MXI1 (GRN) CETN2" source="67341" target="67352" cy:directed="1"/>
      <edge id="80895" label="MXI1 (GRN) MAK" source="67341" target="67351" cy:directed="1"/>
      <edge id="80894" label="MXI1 (GRN) CDHR3" source="67341" target="67350" cy:directed="1"/>
      <edge id="80893" label="MXI1 (GRN) ROPN1L" source="67341" target="67349" cy:directed="1"/>
      <edge id="80892" label="MXI1 (GRN) TSPAN1" source="67341" target="67348" cy:directed="1"/>
      <edge id="80891" label="MXI1 (GRN) CCNO" source="67341" target="67347" cy:directed="1"/>
      <edge id="80890" label="MXI1 (GRN) C1orf192" source="67341" target="67308" cy:directed="1"/>
      <edge id="80889" label="MXI1 (GRN) LRRC23" source="67341" target="67346" cy:directed="1"/>
      <edge id="80888" label="MXI1 (GRN) LRRC48" source="67341" target="67307" cy:directed="1"/>
      <edge id="80887" label="MXI1 (GRN) SPEF1" source="67341" target="67345" cy:directed="1"/>
      <edge id="80886" label="MXI1 (GRN) ZMYND10" source="67341" target="67344" cy:directed="1"/>
      <edge id="80885" label="MXI1 (GRN) WDR66" source="67341" target="67343" cy:directed="1"/>
      <edge id="80884" label="MXI1 (GRN) TP73" source="67341" target="67342" cy:directed="1"/>
      <edge id="80883" label="MEF2B (GRN) CDC123" source="67340" target="66811" cy:directed="1"/>
      <edge id="80882" label="MEF2B (GRN) ELP3" source="67340" target="67534" cy:directed="1"/>
      <edge id="80881" label="MEF2B (GRN) TCTA" source="67340" target="66942" cy:directed="1"/>
      <edge id="80880" label="MEF2B (GRN) LSM5" source="67340" target="67063" cy:directed="1"/>
      <edge id="80879" label="MEF2B (GRN) LCMT1" source="67340" target="66765" cy:directed="1"/>
      <edge id="80878" label="MEF2B (GRN) KCTD5" source="67340" target="67804" cy:directed="1"/>
      <edge id="80877" label="MEF2B (GRN) SLC36A1" source="67340" target="67520" cy:directed="1"/>
      <edge id="80876" label="MEF2B (GRN) DDX41" source="67340" target="66794" cy:directed="1"/>
      <edge id="80875" label="MEF2B (GRN) MRPS33" source="67340" target="66624" cy:directed="1"/>
      <edge id="80874" label="MEF2B (GRN) GMPPA" source="67340" target="66510" cy:directed="1"/>
      <edge id="80873" label="MEF2B (GRN) SLC25A11" source="67340" target="66540" cy:directed="1"/>
      <edge id="80872" label="MEF2B (GRN) NIF3L1" source="67340" target="66806" cy:directed="1"/>
      <edge id="80871" label="MEF2B (GRN) GEMIN7" source="67340" target="66803" cy:directed="1"/>
      <edge id="80870" label="MEF2B (GRN) C9orf69" source="67340" target="66744" cy:directed="1"/>
      <edge id="80869" label="MEF2B (GRN) ATP5G1" source="67340" target="67113" cy:directed="1"/>
      <edge id="80868" label="MEF2B (GRN) TMEM147" source="67340" target="67015" cy:directed="1"/>
      <edge id="80867" label="MEF2B (GRN) METTL6" source="67340" target="66960" cy:directed="1"/>
      <edge id="80866" label="MEF2B (GRN) MPI" source="67340" target="66758" cy:directed="1"/>
      <edge id="80865" label="MEF2B (GRN) THAP8" source="67340" target="66795" cy:directed="1"/>
      <edge id="80864" label="MEF2B (GRN) PTCD2" source="67340" target="66793" cy:directed="1"/>
      <edge id="80863" label="MEF2B (GRN) APOA1BP" source="67340" target="66674" cy:directed="1"/>
      <edge id="80862" label="MEF2B (GRN) SAPCD2" source="67340" target="66447" cy:directed="1"/>
      <edge id="80861" label="MEF2B (GRN) SLC27A4" source="67340" target="66905" cy:directed="1"/>
      <edge id="80860" label="MEF2B (GRN) CECR5" source="67340" target="67030" cy:directed="1"/>
      <edge id="80859" label="MEF2B (GRN) KLHL12" source="67340" target="66944" cy:directed="1"/>
      <edge id="80858" label="MEF2B (GRN) SMUG1" source="67340" target="67021" cy:directed="1"/>
      <edge id="80857" label="MEF2B (GRN) TMEM79" source="67340" target="66609" cy:directed="1"/>
      <edge id="80856" label="MEF2B (GRN) CCDC167" source="67340" target="66633" cy:directed="1"/>
      <edge id="80855" label="MEF2B (GRN) PCBD2" source="67340" target="66740" cy:directed="1"/>
      <edge id="80854" label="MEF2B (GRN) PREB" source="67340" target="66711" cy:directed="1"/>
      <edge id="80853" label="MEF2B (GRN) LAMTOR1" source="67340" target="66982" cy:directed="1"/>
      <edge id="80852" label="MEF2B (GRN) LEO1" source="67340" target="66708" cy:directed="1"/>
      <edge id="80851" label="MEF2B (GRN) NUDT16L1" source="67340" target="66997" cy:directed="1"/>
      <edge id="80850" label="MEF2B (GRN) IPO13" source="67340" target="66874" cy:directed="1"/>
      <edge id="80849" label="MEF2B (GRN) ARMC6" source="67340" target="66686" cy:directed="1"/>
      <edge id="80848" label="MEF2B (GRN) COPE" source="67340" target="66599" cy:directed="1"/>
      <edge id="80847" label="MEF2B (GRN) AP5S1" source="67340" target="66642" cy:directed="1"/>
      <edge id="80846" label="MEF2B (GRN) PARP1" source="67340" target="66571" cy:directed="1"/>
      <edge id="80845" label="MEF2B (GRN) ITPA" source="67340" target="66672" cy:directed="1"/>
      <edge id="80844" label="MEF2B (GRN) NSUN5" source="67340" target="67087" cy:directed="1"/>
      <edge id="80843" label="MEF2B (GRN) COQ9" source="67340" target="66576" cy:directed="1"/>
      <edge id="80842" label="MEF2B (GRN) ABCB8" source="67340" target="66653" cy:directed="1"/>
      <edge id="80841" label="MEF2B (GRN) C19orf24" source="67340" target="66909" cy:directed="1"/>
      <edge id="80840" label="MEF2B (GRN) RABIF" source="67340" target="67000" cy:directed="1"/>
      <edge id="80839" label="MEF2B (GRN) METTL13" source="67340" target="66593" cy:directed="1"/>
      <edge id="80838" label="MEF2B (GRN) FAM203A" source="67340" target="66494" cy:directed="1"/>
      <edge id="80837" label="MEF2B (GRN) MRPL15" source="67340" target="66626" cy:directed="1"/>
      <edge id="80836" label="MEF2B (GRN) MPV17" source="67340" target="66623" cy:directed="1"/>
      <edge id="80835" label="MEF2B (GRN) DAP3" source="67340" target="66538" cy:directed="1"/>
      <edge id="80834" label="MEF2B (GRN) CDK5" source="67340" target="66572" cy:directed="1"/>
      <edge id="80833" label="MEF2B (GRN) CYB561D2" source="67340" target="66462" cy:directed="1"/>
      <edge id="80832" label="MEF2B (GRN) CTSA" source="67340" target="66592" cy:directed="1"/>
      <edge id="80831" label="MEF2B (GRN) MIS18A" source="67340" target="66480" cy:directed="1"/>
      <edge id="80830" label="MEF2B (GRN) S1PR4" source="67340" target="66499" cy:directed="1"/>
      <edge id="80829" label="MEF2B (GRN) DTYMK" source="67340" target="66977" cy:directed="1"/>
      <edge id="80828" label="MEF2B (GRN) SLC25A39" source="67340" target="67101" cy:directed="1"/>
      <edge id="80827" label="MEF2B (GRN) AURKA" source="67340" target="66969" cy:directed="1"/>
      <edge id="80826" label="FXN (GCN) PYCR1" source="67339" target="66561" cy:directed="1"/>
      <edge id="80825" label="ELF1 (GRN) CPSF3" source="67338" target="66575" cy:directed="1"/>
      <edge id="80824" label="ELF1 (GRN) SMAD6" source="67338" target="67496" cy:directed="1"/>
      <edge id="80823" label="ELF1 (GRN) SUOX" source="67338" target="66537" cy:directed="1"/>
      <edge id="80822" label="ELF1 (GRN) DCAF13" source="67338" target="66629" cy:directed="1"/>
      <edge id="80821" label="ELF1 (GRN) REXO4" source="67338" target="67580" cy:directed="1"/>
      <edge id="80820" label="ELF1 (GRN) POLR3K" source="67338" target="66684" cy:directed="1"/>
      <edge id="80819" label="ELF1 (GRN) IGSF6" source="67338" target="66804" cy:directed="1"/>
      <edge id="80818" label="ELF1 (GRN) CD33" source="67338" target="66550" cy:directed="1"/>
      <edge id="80817" label="ELF1 (GRN) ARCN1" source="67338" target="67489" cy:directed="1"/>
      <edge id="80816" label="ELF1 (GRN) MRPS23" source="67338" target="66738" cy:directed="1"/>
      <edge id="80815" label="ELF1 (GRN) CDKL2" source="67338" target="67482" cy:directed="1"/>
      <edge id="80814" label="ELF1 (GRN) POLR2C" source="67338" target="66527" cy:directed="1"/>
      <edge id="80813" label="ELF1 (GRN) C1orf85" source="67338" target="66579" cy:directed="1"/>
      <edge id="80812" label="ELF1 (GRN) ABCB8" source="67338" target="66653" cy:directed="1"/>
      <edge id="80811" label="ELF1 (GRN) C19orf59" source="67338" target="66732" cy:directed="1"/>
      <edge id="80810" label="ELF1 (GRN) EIF2B3" source="67338" target="67925" cy:directed="1"/>
      <edge id="80809" label="ELF1 (GRN) PABPC1L" source="67338" target="67483" cy:directed="1"/>
      <edge id="80808" label="ELF1 (GRN) SLC7A7" source="67338" target="66683" cy:directed="1"/>
      <edge id="80807" label="ELF1 (GRN) ZNF385B" source="67338" target="67742" cy:directed="1"/>
      <edge id="80806" label="ELF1 (GRN) JAGN1" source="67338" target="66847" cy:directed="1"/>
      <edge id="80805" label="ELF1 (GRN) MLYCD" source="67338" target="66845" cy:directed="1"/>
      <edge id="80804" label="ELF1 (GRN) CSTF2" source="67338" target="66556" cy:directed="1"/>
      <edge id="80803" label="ELF1 (GRN) PSMG3" source="67338" target="66829" cy:directed="1"/>
      <edge id="80802" label="ELF1 (GRN) MTX2" source="67338" target="66658" cy:directed="1"/>
      <edge id="80801" label="ELF1 (GRN) SLC5A6" source="67338" target="66625" cy:directed="1"/>
      <edge id="80800" label="ELF1 (GRN) GBA" source="67338" target="66580" cy:directed="1"/>
      <edge id="80799" label="ELF1 (GRN) ABRACL" source="67338" target="66714" cy:directed="1"/>
      <edge id="80798" label="ELF1 (GRN) MRPL15" source="67338" target="66626" cy:directed="1"/>
      <edge id="80797" label="ELF1 (GRN) SPRYD4" source="67338" target="66676" cy:directed="1"/>
      <edge id="80796" label="ELF1 (GRN) C16orf70" source="67338" target="66928" cy:directed="1"/>
      <edge id="80795" label="ELF1 (GRN) TMEM106A" source="67338" target="66823" cy:directed="1"/>
      <edge id="80794" label="ELF1 (GRN) BRAT1" source="67338" target="66821" cy:directed="1"/>
      <edge id="80793" label="ELF1 (GRN) LAIR1" source="67338" target="66541" cy:directed="1"/>
      <edge id="80792" label="ELF1 (GRN) TPD52L2" source="67338" target="66820" cy:directed="1"/>
      <edge id="80791" label="ELF1 (GRN) TSR3" source="67338" target="66815" cy:directed="1"/>
      <edge id="80790" label="ELF1 (GRN) MRPS35" source="67338" target="66810" cy:directed="1"/>
      <edge id="80789" label="ELF1 (GRN) FAM86C1" source="67338" target="66631" cy:directed="1"/>
      <edge id="80788" label="ELF1 (GRN) FLRT3" source="67338" target="66554" cy:directed="1"/>
      <edge id="80787" label="ELF1 (GRN) MRPL35" source="67338" target="66927" cy:directed="1"/>
      <edge id="80786" label="ELF1 (GRN) GJA5" source="67338" target="66799" cy:directed="1"/>
      <edge id="80785" label="ELF1 (GRN) BRI3" source="67338" target="66587" cy:directed="1"/>
      <edge id="80784" label="ELF1 (GRN) MECR" source="67338" target="66728" cy:directed="1"/>
      <edge id="80783" label="ELF1 (GRN) COA6" source="67338" target="66953" cy:directed="1"/>
      <edge id="80782" label="ELF1 (GRN) GOT2" source="67338" target="66560" cy:directed="1"/>
      <edge id="80781" label="ELF1 (GRN) SLC46A1" source="67338" target="66545" cy:directed="1"/>
      <edge id="80780" label="ELF1 (GRN) MIS18A" source="67338" target="66480" cy:directed="1"/>
      <edge id="80779" label="ELF1 (GRN) DOK3" source="67338" target="66773" cy:directed="1"/>
      <edge id="80778" label="ELF1 (GRN) SNUPN" source="67338" target="66768" cy:directed="1"/>
      <edge id="80777" label="ELF1 (GRN) ARMC6" source="67338" target="66686" cy:directed="1"/>
      <edge id="80776" label="ELF1 (GRN) PCCB" source="67338" target="66759" cy:directed="1"/>
      <edge id="80775" label="ELF1 (GRN) MPI" source="67338" target="66758" cy:directed="1"/>
      <edge id="80774" label="ELF1 (GRN) DLAT" source="67338" target="66751" cy:directed="1"/>
      <edge id="80773" label="ELF1 (GRN) CDK5" source="67338" target="66572" cy:directed="1"/>
      <edge id="80772" label="ELF1 (GRN) FXN" source="67338" target="67339" cy:directed="1"/>
      <edge id="80771" label="ELF1 (GRN) DCTPP1" source="67338" target="66619" cy:directed="1"/>
      <edge id="80770" label="ELF1 (GRN) NDUFA8" source="67338" target="66735" cy:directed="1"/>
      <edge id="80769" label="ELF1 (GRN) YKT6" source="67338" target="66724" cy:directed="1"/>
      <edge id="80768" label="ELF1 (GRN) ATP5G3" source="67338" target="66543" cy:directed="1"/>
      <edge id="80767" label="ELF1 (GRN) SMYD5" source="67338" target="67156" cy:directed="1"/>
      <edge id="80766" label="ELF1 (GRN) PREB" source="67338" target="66711" cy:directed="1"/>
      <edge id="80765" label="ELF1 (GRN) NME6" source="67338" target="66486" cy:directed="1"/>
      <edge id="80764" label="ELF1 (GRN) SEC23B" source="67338" target="66650" cy:directed="1"/>
      <edge id="80763" label="ELF1 (GRN) SSR1" source="67338" target="66699" cy:directed="1"/>
      <edge id="80762" label="ELF1 (GRN) PET112" source="67338" target="66697" cy:directed="1"/>
      <edge id="80761" label="ELF1 (GRN) TRAPPC1" source="67338" target="66691" cy:directed="1"/>
      <edge id="80760" label="ELF1 (GRN) FBXO41" source="67338" target="66661" cy:directed="1"/>
      <edge id="80759" label="ELF1 (GRN) TMEM223" source="67338" target="66677" cy:directed="1"/>
      <edge id="80758" label="ELF1 (GRN) FIBP" source="67338" target="67077" cy:directed="1"/>
      <edge id="80757" label="ELF1 (GRN) CCDC167" source="67338" target="66633" cy:directed="1"/>
      <edge id="80756" label="ELF1 (GRN) RGS19" source="67338" target="66616" cy:directed="1"/>
      <edge id="80755" label="ELF1 (GRN) GNPDA1" source="67338" target="66639" cy:directed="1"/>
      <edge id="80754" label="ELF1 (GRN) AKR1A1" source="67338" target="66551" cy:directed="1"/>
      <edge id="80753" label="ELF1 (GRN) PRAM1" source="67338" target="66627" cy:directed="1"/>
      <edge id="80752" label="ELF1 (GRN) SAC3D1" source="67338" target="66542" cy:directed="1"/>
      <edge id="80751" label="ELF1 (GRN) PARK7" source="67338" target="66889" cy:directed="1"/>
      <edge id="80750" label="ELF1 (GRN) TMEM79" source="67338" target="66609" cy:directed="1"/>
      <edge id="80749" label="ELF1 (GRN) AIFM1" source="67338" target="66469" cy:directed="1"/>
      <edge id="80748" label="ELF1 (GRN) C19orf48" source="67338" target="66569" cy:directed="1"/>
      <edge id="80747" label="ELF1 (GRN) ANAPC11" source="67338" target="66912" cy:directed="1"/>
      <edge id="80746" label="ELF1 (GRN) SYS1" source="67338" target="66590" cy:directed="1"/>
      <edge id="80745" label="ELF1 (GRN) NECAB1" source="67338" target="66581" cy:directed="1"/>
      <edge id="80744" label="ELF1 (GRN) LRRK2" source="67338" target="66454" cy:directed="1"/>
      <edge id="80743" label="ELF1 (GRN) MCM2" source="67338" target="66444" cy:directed="1"/>
      <edge id="80742" label="ELF1 (GRN) RENBP" source="67338" target="66555" cy:directed="1"/>
      <edge id="80741" label="ELF1 (GRN) CD300LF" source="67338" target="66552" cy:directed="1"/>
      <edge id="80740" label="ELF1 (GRN) PAFAH1B3" source="67338" target="66497" cy:directed="1"/>
      <edge id="80739" label="ELF1 (GRN) PYCR1" source="67338" target="66561" cy:directed="1"/>
      <edge id="80738" label="ELF1 (GRN) C1QBP" source="67338" target="66534" cy:directed="1"/>
      <edge id="80737" label="ELF1 (GRN) COPZ1" source="67338" target="66525" cy:directed="1"/>
      <edge id="80736" label="ELF1 (GRN) CAPN3" source="67338" target="66524" cy:directed="1"/>
      <edge id="80735" label="ELF1 (GRN) SNF8" source="67338" target="66856" cy:directed="1"/>
      <edge id="80734" label="ELF1 (GRN) NUBP1" source="67338" target="66496" cy:directed="1"/>
      <edge id="80733" label="ELF1 (GRN) FPR3" source="67338" target="66489" cy:directed="1"/>
      <edge id="80732" label="ELF1 (GRN) SLC22A3" source="67338" target="66967" cy:directed="1"/>
      <edge id="80731" label="TOR3A (GCN) C16orf59" source="67337" target="66443" cy:directed="1"/>
      <edge id="80730" label="ELF3 (GRN) RTKN" source="67336" target="67825" cy:directed="1"/>
      <edge id="80729" label="ELF3 (GRN) ARV1" source="67336" target="67826" cy:directed="1"/>
      <edge id="80728" label="ELF3 (GRN) THOP1" source="67336" target="67530" cy:directed="1"/>
      <edge id="80727" label="ELF3 (GRN) POLR3C" source="67336" target="67612" cy:directed="1"/>
      <edge id="80726" label="ELF3 (GRN) SMAD6" source="67336" target="67496" cy:directed="1"/>
      <edge id="80725" label="ELF3 (GRN) SMYD5" source="67336" target="67156" cy:directed="1"/>
      <edge id="80724" label="ELF3 (GRN) MEGF9" source="67336" target="67020" cy:directed="1"/>
      <edge id="80723" label="ELF3 (GRN) MMACHC" source="67336" target="66647" cy:directed="1"/>
      <edge id="80722" label="ELF3 (GRN) ATAD3C" source="67336" target="67243" cy:directed="1"/>
      <edge id="80721" label="ELF3 (GRN) TSFM" source="67336" target="66750" cy:directed="1"/>
      <edge id="80720" label="ELF3 (GRN) FAM86A" source="67336" target="66613" cy:directed="1"/>
      <edge id="80719" label="ELF3 (GRN) TMEM192" source="67336" target="67518" cy:directed="1"/>
      <edge id="80718" label="ELF3 (GRN) SPTSSA" source="67336" target="67820" cy:directed="1"/>
      <edge id="80717" label="ELF3 (GRN) DCLRE1A" source="67336" target="67326" cy:directed="1"/>
      <edge id="80716" label="ELF3 (GRN) NOC2L" source="67336" target="67746" cy:directed="1"/>
      <edge id="80715" label="ELF3 (GRN) GSTZ1" source="67336" target="66597" cy:directed="1"/>
      <edge id="80714" label="ELF3 (GRN) QDPR" source="67336" target="67488" cy:directed="1"/>
      <edge id="80713" label="ELF3 (GRN) DDX41" source="67336" target="66794" cy:directed="1"/>
      <edge id="80712" label="ELF3 (GRN) SLC36A1" source="67336" target="67520" cy:directed="1"/>
      <edge id="80711" label="ELF3 (GRN) DNTTIP1" source="67336" target="67640" cy:directed="1"/>
      <edge id="80710" label="ELF3 (GRN) POLR3K" source="67336" target="66684" cy:directed="1"/>
      <edge id="80709" label="ELF3 (GRN) VAC14" source="67336" target="67630" cy:directed="1"/>
      <edge id="80708" label="ELF3 (GRN) MESP1" source="67336" target="67645" cy:directed="1"/>
      <edge id="80707" label="ELF3 (GRN) C17orf62" source="67336" target="66913" cy:directed="1"/>
      <edge id="80706" label="ELF3 (GRN) CTSA" source="67336" target="66592" cy:directed="1"/>
      <edge id="80705" label="ELF3 (GRN) TSSC1" source="67336" target="66622" cy:directed="1"/>
      <edge id="80704" label="ELF3 (GRN) MANEAL" source="67336" target="66507" cy:directed="1"/>
      <edge id="80703" label="ELF3 (GRN) SLC30A6" source="67336" target="67166" cy:directed="1"/>
      <edge id="80702" label="ELF3 (GRN) ARMC9" source="67336" target="67490" cy:directed="1"/>
      <edge id="80701" label="ELF3 (GRN) EME1" source="67336" target="66468" cy:directed="1"/>
      <edge id="80700" label="ELF3 (GRN) CDKL2" source="67336" target="67482" cy:directed="1"/>
      <edge id="80699" label="ELF3 (GRN) ABCB8" source="67336" target="66653" cy:directed="1"/>
      <edge id="80698" label="ELF3 (GRN) NOP56" source="67336" target="67507" cy:directed="1"/>
      <edge id="80697" label="ELF3 (GRN) PABPC1L" source="67336" target="67483" cy:directed="1"/>
      <edge id="80696" label="ELF3 (GRN) C19orf59" source="67336" target="66732" cy:directed="1"/>
      <edge id="80695" label="ELF3 (GRN) ALG5" source="67336" target="66899" cy:directed="1"/>
      <edge id="80694" label="ELF3 (GRN) TOX" source="67336" target="67817" cy:directed="1"/>
      <edge id="80693" label="ELF3 (GRN) ZNF696" source="67336" target="66848" cy:directed="1"/>
      <edge id="80692" label="ELF3 (GRN) JAGN1" source="67336" target="66847" cy:directed="1"/>
      <edge id="80691" label="ELF3 (GRN) MLYCD" source="67336" target="66845" cy:directed="1"/>
      <edge id="80690" label="ELF3 (GRN) FAM86C1" source="67336" target="66631" cy:directed="1"/>
      <edge id="80689" label="ELF3 (GRN) NABP2" source="67336" target="67073" cy:directed="1"/>
      <edge id="80688" label="ELF3 (GRN) ZSWIM7" source="67336" target="66980" cy:directed="1"/>
      <edge id="80687" label="ELF3 (GRN) MRPL4" source="67336" target="66731" cy:directed="1"/>
      <edge id="80686" label="ELF3 (GRN) LSS" source="67336" target="66566" cy:directed="1"/>
      <edge id="80685" label="ELF3 (GRN) MECR" source="67336" target="66728" cy:directed="1"/>
      <edge id="80684" label="ELF3 (GRN) FITM2" source="67336" target="66453" cy:directed="1"/>
      <edge id="80683" label="ELF3 (GRN) BRAT1" source="67336" target="66821" cy:directed="1"/>
      <edge id="80682" label="ELF3 (GRN) HN1" source="67336" target="66774" cy:directed="1"/>
      <edge id="80681" label="ELF3 (GRN) FIGNL1" source="67336" target="66570" cy:directed="1"/>
      <edge id="80680" label="ELF3 (GRN) TSR3" source="67336" target="66815" cy:directed="1"/>
      <edge id="80679" label="ELF3 (GRN) SYS1" source="67336" target="66590" cy:directed="1"/>
      <edge id="80678" label="ELF3 (GRN) SDCCAG3" source="67336" target="66812" cy:directed="1"/>
      <edge id="80677" label="ELF3 (GRN) CCDC71" source="67336" target="66502" cy:directed="1"/>
      <edge id="80676" label="ELF3 (GRN) MEF2BNB" source="67336" target="66481" cy:directed="1"/>
      <edge id="80675" label="ELF3 (GRN) FLRT3" source="67336" target="66554" cy:directed="1"/>
      <edge id="80674" label="ELF3 (GRN) SLC35C1" source="67336" target="66586" cy:directed="1"/>
      <edge id="80673" label="ELF3 (GRN) CD33" source="67336" target="66550" cy:directed="1"/>
      <edge id="80672" label="ELF3 (GRN) DUOX1" source="67336" target="66690" cy:directed="1"/>
      <edge id="80671" label="ELF3 (GRN) CHCHD1" source="67336" target="66923" cy:directed="1"/>
      <edge id="80670" label="ELF3 (GRN) FAM118B" source="67336" target="66936" cy:directed="1"/>
      <edge id="80669" label="ELF3 (GRN) XYLB" source="67336" target="66742" cy:directed="1"/>
      <edge id="80668" label="ELF3 (GRN) MS4A4A" source="67336" target="66789" cy:directed="1"/>
      <edge id="80667" label="ELF3 (GRN) CUL7" source="67336" target="66766" cy:directed="1"/>
      <edge id="80666" label="ELF3 (GRN) RFT1" source="67336" target="67289" cy:directed="1"/>
      <edge id="80665" label="ELF3 (GRN) SSBP1" source="67336" target="66636" cy:directed="1"/>
      <edge id="80664" label="ELF3 (GRN) TOR3A" source="67336" target="67337" cy:directed="1"/>
      <edge id="80663" label="ELF3 (GRN) NUBP1" source="67336" target="66496" cy:directed="1"/>
      <edge id="80662" label="ELF3 (GRN) GTF3C6" source="67336" target="66775" cy:directed="1"/>
      <edge id="80661" label="ELF3 (GRN) NAT10" source="67336" target="66602" cy:directed="1"/>
      <edge id="80660" label="ELF3 (GRN) DOK3" source="67336" target="66773" cy:directed="1"/>
      <edge id="80659" label="ELF3 (GRN) SNUPN" source="67336" target="66768" cy:directed="1"/>
      <edge id="80658" label="ELF3 (GRN) LCMT1" source="67336" target="66765" cy:directed="1"/>
      <edge id="80657" label="ELF3 (GRN) NFS1" source="67336" target="66760" cy:directed="1"/>
      <edge id="80656" label="ELF3 (GRN) DIEXF" source="67336" target="66584" cy:directed="1"/>
      <edge id="80655" label="ELF3 (GRN) MILR1" source="67336" target="66749" cy:directed="1"/>
      <edge id="80654" label="ELF3 (GRN) NSUN5" source="67336" target="67087" cy:directed="1"/>
      <edge id="80653" label="ELF3 (GRN) LRRC20" source="67336" target="66915" cy:directed="1"/>
      <edge id="80652" label="ELF3 (GRN) APOA1BP" source="67336" target="66674" cy:directed="1"/>
      <edge id="80651" label="ELF3 (GRN) TMEM261" source="67336" target="66736" cy:directed="1"/>
      <edge id="80650" label="ELF3 (GRN) GNPDA1" source="67336" target="66639" cy:directed="1"/>
      <edge id="80649" label="ELF3 (GRN) CPSF3" source="67336" target="66575" cy:directed="1"/>
      <edge id="80648" label="ELF3 (GRN) ARPC1B" source="67336" target="66716" cy:directed="1"/>
      <edge id="80647" label="ELF3 (GRN) CCDC167" source="67336" target="66633" cy:directed="1"/>
      <edge id="80646" label="ELF3 (GRN) SNRNP25" source="67336" target="66934" cy:directed="1"/>
      <edge id="80645" label="ELF3 (GRN) HM13" source="67336" target="66895" cy:directed="1"/>
      <edge id="80644" label="ELF3 (GRN) DDOST" source="67336" target="66515" cy:directed="1"/>
      <edge id="80643" label="ELF3 (GRN) CTNS" source="67336" target="66873" cy:directed="1"/>
      <edge id="80642" label="ELF3 (GRN) FAM203A" source="67336" target="66494" cy:directed="1"/>
      <edge id="80641" label="ELF3 (GRN) ST3GAL5" source="67336" target="66720" cy:directed="1"/>
      <edge id="80640" label="ELF3 (GRN) RER1" source="67336" target="66558" cy:directed="1"/>
      <edge id="80639" label="ELF3 (GRN) TMEM223" source="67336" target="66677" cy:directed="1"/>
      <edge id="80638" label="ELF3 (GRN) RNH1" source="67336" target="66548" cy:directed="1"/>
      <edge id="80637" label="ELF3 (GRN) CENPH" source="67336" target="66539" cy:directed="1"/>
      <edge id="80636" label="ELF3 (GRN) ATP6V1F" source="67336" target="66865" cy:directed="1"/>
      <edge id="80635" label="ELF3 (GRN) CDK5" source="67336" target="66572" cy:directed="1"/>
      <edge id="80634" label="ELF3 (GRN) AP5S1" source="67336" target="66642" cy:directed="1"/>
      <edge id="80633" label="ELF3 (GRN) PRDX4" source="67336" target="66491" cy:directed="1"/>
      <edge id="80632" label="ELF3 (GRN) RENBP" source="67336" target="66555" cy:directed="1"/>
      <edge id="80631" label="ELF3 (GRN) PRAM1" source="67336" target="66627" cy:directed="1"/>
      <edge id="80630" label="ELF3 (GRN) CHID1" source="67336" target="67152" cy:directed="1"/>
      <edge id="80629" label="ELF3 (GRN) SAC3D1" source="67336" target="66542" cy:directed="1"/>
      <edge id="80628" label="ELF3 (GRN) LAMTOR2" source="67336" target="66863" cy:directed="1"/>
      <edge id="80627" label="ELF3 (GRN) C19orf48" source="67336" target="66569" cy:directed="1"/>
      <edge id="80626" label="ELF3 (GRN) DRAM1" source="67336" target="66490" cy:directed="1"/>
      <edge id="80625" label="ELF3 (GRN) PXMP4" source="67336" target="66857" cy:directed="1"/>
      <edge id="80624" label="ELF3 (GRN) FUT3" source="67336" target="66600" cy:directed="1"/>
      <edge id="80623" label="ELF3 (GRN) ANAPC11" source="67336" target="66912" cy:directed="1"/>
      <edge id="80622" label="ELF3 (GRN) MND1" source="67336" target="66493" cy:directed="1"/>
      <edge id="80621" label="ELF3 (GRN) NECAB1" source="67336" target="66581" cy:directed="1"/>
      <edge id="80620" label="ELF3 (GRN) TIMM13" source="67336" target="66574" cy:directed="1"/>
      <edge id="80619" label="ELF3 (GRN) APEX1" source="67336" target="66519" cy:directed="1"/>
      <edge id="80618" label="ELF3 (GRN) TMED3" source="67336" target="66501" cy:directed="1"/>
      <edge id="80617" label="ELF3 (GRN) PAFAH1B3" source="67336" target="66497" cy:directed="1"/>
      <edge id="80616" label="ELF3 (GRN) MSTO1" source="67336" target="67265" cy:directed="1"/>
      <edge id="80615" label="ELF3 (GRN) C16orf59" source="67336" target="66443" cy:directed="1"/>
      <edge id="80614" label="ELF3 (GRN) POLR2C" source="67336" target="66527" cy:directed="1"/>
      <edge id="80613" label="ELF3 (GRN) EPDR1" source="67336" target="66466" cy:directed="1"/>
      <edge id="80612" label="ELF3 (GRN) CD300LF" source="67336" target="66552" cy:directed="1"/>
      <edge id="80611" label="ELF3 (GRN) RNASEH2A" source="67336" target="66861" cy:directed="1"/>
      <edge id="80610" label="ELF3 (GRN) AKR1A1" source="67336" target="66551" cy:directed="1"/>
      <edge id="80609" label="ELF3 (GRN) ECE2" source="67336" target="66851" cy:directed="1"/>
      <edge id="80608" label="ELF3 (GRN) B3GNT8" source="67336" target="66485" cy:directed="1"/>
      <edge id="80607" label="ELF3 (GRN) DOLPP1" source="67336" target="66492" cy:directed="1"/>
      <edge id="80606" label="ELF3 (GRN) CAPN3" source="67336" target="66524" cy:directed="1"/>
      <edge id="80605" label="ELF3 (GRN) ALOX5AP" source="67336" target="66855" cy:directed="1"/>
      <edge id="80604" label="ELF3 (GRN) SLC38A7" source="67336" target="66487" cy:directed="1"/>
      <edge id="80603" label="ELF3 (GRN) MIS18A" source="67336" target="66480" cy:directed="1"/>
      <edge id="80602" label="ELF3 (GRN) LAMP3" source="67336" target="67126" cy:directed="1"/>
      <edge id="80601" label="ELF3 (GRN) TMEM41A" source="67336" target="66511" cy:directed="1"/>
      <edge id="80600" label="ZBTB1 (GRN) PARN" source="67335" target="67495" cy:directed="1"/>
      <edge id="80599" label="ZBTB1 (GRN) SNX25" source="67335" target="66437" cy:directed="1"/>
      <edge id="80598" label="ZBTB1 (GRN) LRRK2" source="67335" target="66454" cy:directed="1"/>
      <edge id="80597" label="HES7 (GRN) CDKL2" source="67334" target="67482" cy:directed="1"/>
      <edge id="80596" label="HES7 (GRN) PARN" source="67334" target="67495" cy:directed="1"/>
      <edge id="80595" label="HES7 (GRN) NECAB1" source="67334" target="66581" cy:directed="1"/>
      <edge id="80594" label="HES7 (GRN) SNX25" source="67334" target="66437" cy:directed="1"/>
      <edge id="80593" label="HES7 (GRN) LRRK2" source="67334" target="66454" cy:directed="1"/>
      <edge id="80592" label="HES5 (GRN) CDKL2" source="67333" target="67482" cy:directed="1"/>
      <edge id="80591" label="HES5 (GRN) POLR2C" source="67333" target="66527" cy:directed="1"/>
      <edge id="80590" label="HES5 (GRN) PARN" source="67333" target="67495" cy:directed="1"/>
      <edge id="80589" label="HES5 (GRN) NECAB1" source="67333" target="66581" cy:directed="1"/>
      <edge id="80588" label="HES5 (GRN) SNX25" source="67333" target="66437" cy:directed="1"/>
      <edge id="80587" label="HES5 (GRN) LRRK2" source="67333" target="66454" cy:directed="1"/>
      <edge id="80586" label="HES5 (GRN) PTPN13" source="67333" target="66463" cy:directed="1"/>
      <edge id="80585" label="HES4 (GRN) MACROD2" source="67332" target="66598" cy:directed="1"/>
      <edge id="80584" label="HES4 (GRN) CDKL2" source="67332" target="67482" cy:directed="1"/>
      <edge id="80583" label="HES4 (GRN) POLR2C" source="67332" target="66527" cy:directed="1"/>
      <edge id="80582" label="HES4 (GRN) PARN" source="67332" target="67495" cy:directed="1"/>
      <edge id="80581" label="HES4 (GRN) CPSF3" source="67332" target="66575" cy:directed="1"/>
      <edge id="80580" label="HES4 (GRN) NECAB1" source="67332" target="66581" cy:directed="1"/>
      <edge id="80579" label="HES4 (GRN) SNX25" source="67332" target="66437" cy:directed="1"/>
      <edge id="80578" label="HES4 (GRN) LRRK2" source="67332" target="66454" cy:directed="1"/>
      <edge id="80577" label="ELK1 (GRN) ZMYND8" source="67331" target="67924" cy:directed="1"/>
      <edge id="80576" label="ELK1 (GRN) MBIP" source="67331" target="67196" cy:directed="1"/>
      <edge id="80575" label="ELK1 (GRN) MACROD2" source="67331" target="66598" cy:directed="1"/>
      <edge id="80574" label="ELK1 (GRN) CDKL2" source="67331" target="67482" cy:directed="1"/>
      <edge id="80573" label="ELK1 (GRN) PARN" source="67331" target="67495" cy:directed="1"/>
      <edge id="80572" label="ELK1 (GRN) PARM1" source="67331" target="67478" cy:directed="1"/>
      <edge id="80571" label="ELK1 (GRN) ZNF385B" source="67331" target="67742" cy:directed="1"/>
      <edge id="80570" label="ELK1 (GRN) SECISBP2L" source="67331" target="67329" cy:directed="1"/>
      <edge id="80569" label="ELK1 (GRN) C2" source="67331" target="66509" cy:directed="1"/>
      <edge id="80568" label="ELK1 (GRN) C5" source="67331" target="66868" cy:directed="1"/>
      <edge id="80567" label="ELK1 (GRN) FGFR2" source="67331" target="67189" cy:directed="1"/>
      <edge id="80566" label="ELK1 (GRN) PFKFB2" source="67331" target="67253" cy:directed="1"/>
      <edge id="80565" label="ELK1 (GRN) CPSF3" source="67331" target="66575" cy:directed="1"/>
      <edge id="80564" label="ELK1 (GRN) NECAB1" source="67331" target="66581" cy:directed="1"/>
      <edge id="80563" label="ELK1 (GRN) GSTA4" source="67331" target="66512" cy:directed="1"/>
      <edge id="80562" label="ELK1 (GRN) SNX25" source="67331" target="66437" cy:directed="1"/>
      <edge id="80561" label="ELK1 (GRN) SNX30" source="67331" target="66853" cy:directed="1"/>
      <edge id="80560" label="ELK1 (GRN) PTPN13" source="67331" target="66463" cy:directed="1"/>
      <edge id="80559" label="ELK1 (GRN) LRRK2" source="67331" target="66454" cy:directed="1"/>
      <edge id="80558" label="ELK1 (GRN) SLC22A3" source="67331" target="66967" cy:directed="1"/>
      <edge id="80557" label="TGS1 (GCN) SNX25" source="67330" target="66437" cy:directed="1"/>
      <edge id="80556" label="SECISBP2L (GCN) ZMYND8" source="67329" target="67924" cy:directed="1"/>
      <edge id="80555" label="SECISBP2L (GCN) PARN" source="67329" target="67495" cy:directed="1"/>
      <edge id="80554" label="VEPH1 (GCN) MRPS33" source="67328" target="66624" cy:directed="1"/>
      <edge id="80553" label="VEPH1 (GCN) TLCD1" source="67328" target="67130" cy:directed="1"/>
      <edge id="80552" label="BPNT1 (GCN) VEPH1" source="67327" target="67328" cy:directed="1"/>
      <edge id="80551" label="DCLRE1A (GCN) VEPH1" source="67326" target="67328" cy:directed="1"/>
      <edge id="80550" label="BHLHE40 (GRN) DRAM1" source="67325" target="66490" cy:directed="1"/>
      <edge id="80549" label="BHLHE40 (GRN) DHTKD1" source="67325" target="67699" cy:directed="1"/>
      <edge id="80548" label="BHLHE40 (GRN) CD163" source="67325" target="66816" cy:directed="1"/>
      <edge id="80547" label="BHLHE40 (GRN) MIS18A" source="67325" target="66480" cy:directed="1"/>
      <edge id="80546" label="BHLHE40 (GRN) CDKL2" source="67325" target="67482" cy:directed="1"/>
      <edge id="80545" label="BHLHE40 (GRN) POLR2C" source="67325" target="66527" cy:directed="1"/>
      <edge id="80544" label="BHLHE40 (GRN) PARN" source="67325" target="67495" cy:directed="1"/>
      <edge id="80543" label="BHLHE40 (GRN) ARMC9" source="67325" target="67490" cy:directed="1"/>
      <edge id="80542" label="BHLHE40 (GRN) MACROD2" source="67325" target="66598" cy:directed="1"/>
      <edge id="80541" label="BHLHE40 (GRN) MRPS33" source="67325" target="66624" cy:directed="1"/>
      <edge id="80540" label="BHLHE40 (GRN) RPS6KA2" source="67325" target="67127" cy:directed="1"/>
      <edge id="80539" label="BHLHE40 (GRN) SYS1" source="67325" target="66590" cy:directed="1"/>
      <edge id="80538" label="BHLHE40 (GRN) ACAA2" source="67325" target="66939" cy:directed="1"/>
      <edge id="80537" label="BHLHE40 (GRN) NDUFAF1" source="67325" target="67083" cy:directed="1"/>
      <edge id="80536" label="BHLHE40 (GRN) C9orf64" source="67325" target="67706" cy:directed="1"/>
      <edge id="80535" label="BHLHE40 (GRN) TGS1" source="67325" target="67330" cy:directed="1"/>
      <edge id="80534" label="BHLHE40 (GRN) MRPL3" source="67325" target="66465" cy:directed="1"/>
      <edge id="80533" label="BHLHE40 (GRN) RABIF" source="67325" target="67000" cy:directed="1"/>
      <edge id="80532" label="BHLHE40 (GRN) SECISBP2L" source="67325" target="67329" cy:directed="1"/>
      <edge id="80531" label="BHLHE40 (GRN) C5" source="67325" target="66868" cy:directed="1"/>
      <edge id="80530" label="BHLHE40 (GRN) FEN1" source="67325" target="67098" cy:directed="1"/>
      <edge id="80529" label="BHLHE40 (GRN) FGFR2" source="67325" target="67189" cy:directed="1"/>
      <edge id="80528" label="BHLHE40 (GRN) CPSF3" source="67325" target="66575" cy:directed="1"/>
      <edge id="80527" label="BHLHE40 (GRN) MRPS35" source="67325" target="66810" cy:directed="1"/>
      <edge id="80526" label="BHLHE40 (GRN) NECAB1" source="67325" target="66581" cy:directed="1"/>
      <edge id="80525" label="BHLHE40 (GRN) SNX25" source="67325" target="66437" cy:directed="1"/>
      <edge id="80524" label="BHLHE40 (GRN) NIF3L1" source="67325" target="66806" cy:directed="1"/>
      <edge id="80523" label="BHLHE40 (GRN) ACAT1" source="67325" target="66862" cy:directed="1"/>
      <edge id="80522" label="BHLHE40 (GRN) TLCD1" source="67325" target="67130" cy:directed="1"/>
      <edge id="80521" label="BHLHE40 (GRN) GSTA4" source="67325" target="66512" cy:directed="1"/>
      <edge id="80520" label="BHLHE40 (GRN) VEPH1" source="67325" target="67328" cy:directed="1"/>
      <edge id="80519" label="BHLHE40 (GRN) BPNT1" source="67325" target="67327" cy:directed="1"/>
      <edge id="80518" label="BHLHE40 (GRN) EPRS" source="67325" target="67285" cy:directed="1"/>
      <edge id="80517" label="BHLHE40 (GRN) DCLRE1A" source="67325" target="67326" cy:directed="1"/>
      <edge id="80516" label="BHLHE40 (GRN) TSPAN3" source="67325" target="66900" cy:directed="1"/>
      <edge id="80515" label="BHLHE40 (GRN) EPDR1" source="67325" target="66466" cy:directed="1"/>
      <edge id="80514" label="BHLHE40 (GRN) LRRK2" source="67325" target="66454" cy:directed="1"/>
      <edge id="80513" label="BHLHE40 (GRN) LYRM2" source="67325" target="66457" cy:directed="1"/>
      <edge id="80512" label="BHLHE40 (GRN) FITM2" source="67325" target="66453" cy:directed="1"/>
      <edge id="80511" label="BHLHE40 (GRN) TFB2M" source="67325" target="66456" cy:directed="1"/>
      <edge id="80510" label="ARNT (GRN) CPSF3" source="67324" target="66575" cy:directed="1"/>
      <edge id="80509" label="ARNT (GRN) MBIP" source="67324" target="67196" cy:directed="1"/>
      <edge id="80508" label="ARNT (GRN) DAP3" source="67324" target="66538" cy:directed="1"/>
      <edge id="80507" label="ARNT (GRN) C3AR1" source="67324" target="66577" cy:directed="1"/>
      <edge id="80506" label="ARNT (GRN) CDKL2" source="67324" target="67482" cy:directed="1"/>
      <edge id="80505" label="ARNT (GRN) POLR2C" source="67324" target="66527" cy:directed="1"/>
      <edge id="80504" label="ARNT (GRN) PARN" source="67324" target="67495" cy:directed="1"/>
      <edge id="80503" label="ARNT (GRN) ALPL" source="67324" target="67136" cy:directed="1"/>
      <edge id="80502" label="ARNT (GRN) FGFR2" source="67324" target="67189" cy:directed="1"/>
      <edge id="80501" label="ARNT (GRN) DIEXF" source="67324" target="66584" cy:directed="1"/>
      <edge id="80500" label="ARNT (GRN) MRPL3" source="67324" target="66465" cy:directed="1"/>
      <edge id="80499" label="ARNT (GRN) C5" source="67324" target="66868" cy:directed="1"/>
      <edge id="80498" label="ARNT (GRN) RFC4" source="67324" target="67233" cy:directed="1"/>
      <edge id="80497" label="ARNT (GRN) VSIG4" source="67324" target="66445" cy:directed="1"/>
      <edge id="80496" label="ARNT (GRN) UMPS" source="67324" target="66617" cy:directed="1"/>
      <edge id="80495" label="ARNT (GRN) NECAB1" source="67324" target="66581" cy:directed="1"/>
      <edge id="80494" label="ARNT (GRN) SNX25" source="67324" target="66437" cy:directed="1"/>
      <edge id="80493" label="ARNT (GRN) GSTA4" source="67324" target="66512" cy:directed="1"/>
      <edge id="80492" label="ARNT (GRN) TLCD1" source="67324" target="67130" cy:directed="1"/>
      <edge id="80491" label="ARNT (GRN) TSPAN3" source="67324" target="66900" cy:directed="1"/>
      <edge id="80490" label="ARNT (GRN) SNX30" source="67324" target="66853" cy:directed="1"/>
      <edge id="80489" label="ARNT (GRN) LRRK2" source="67324" target="66454" cy:directed="1"/>
      <edge id="80488" label="ARNT (GRN) LYRM2" source="67324" target="66457" cy:directed="1"/>
      <edge id="80487" label="SRM (GCN) CDCA5" source="67323" target="66966" cy:directed="1"/>
      <edge id="80486" label="FBXL6 (GCN) RECQL4" source="67322" target="67319" cy:directed="1"/>
      <edge id="80485" label="ATAD3A (GCN) IRAK1" source="67321" target="66618" cy:directed="1"/>
      <edge id="80484" label="MFSD3 (GCN) PAFAH1B3" source="67320" target="66497" cy:directed="1"/>
      <edge id="80483" label="RECQL4 (GCN) TMEM79" source="67319" target="66609" cy:directed="1"/>
      <edge id="80482" label="RECQL4 (GCN) FASTK" source="67319" target="67032" cy:directed="1"/>
      <edge id="80481" label="RECQL4 (GCN) GPAA1" source="67319" target="66841" cy:directed="1"/>
      <edge id="80480" label="RECQL4 (GCN) ADCK5" source="67319" target="67509" cy:directed="1"/>
      <edge id="80479" label="NDUFS7 (GCN) PAFAH1B3" source="67318" target="66497" cy:directed="1"/>
      <edge id="80478" label="FKBP2 (GCN) PAFAH1B3" source="67317" target="66497" cy:directed="1"/>
      <edge id="80477" label="ABHD11 (GCN) SLC27A3" source="67316" target="67843" cy:directed="1"/>
      <edge id="80476" label="APRT (GCN) TONSL" source="67315" target="66484" cy:directed="1"/>
      <edge id="80475" label="APRT (GCN) FLAD1" source="67315" target="66473" cy:directed="1"/>
      <edge id="80474" label="APRT (GCN) PAFAH1B3" source="67315" target="66497" cy:directed="1"/>
      <edge id="80473" label="SIX5 (GRN) CBX8" source="67314" target="67923" cy:directed="1"/>
      <edge id="80472" label="SIX5 (GRN) TCTA" source="67314" target="66942" cy:directed="1"/>
      <edge id="80471" label="SIX5 (GRN) URM1" source="67314" target="67176" cy:directed="1"/>
      <edge id="80470" label="SIX5 (GRN) SPDYE3" source="67314" target="67602" cy:directed="1"/>
      <edge id="80469" label="SIX5 (GRN) MOB3A" source="67314" target="67786" cy:directed="1"/>
      <edge id="80468" label="SIX5 (GRN) TYMP" source="67314" target="67922" cy:directed="1"/>
      <edge id="80467" label="SIX5 (GRN) GLI4" source="67314" target="67921" cy:directed="1"/>
      <edge id="80466" label="SIX5 (GRN) SNX17" source="67314" target="66614" cy:directed="1"/>
      <edge id="80465" label="SIX5 (GRN) DOK2" source="67314" target="66719" cy:directed="1"/>
      <edge id="80464" label="SIX5 (GRN) CTDSP1" source="67314" target="67902" cy:directed="1"/>
      <edge id="80463" label="SIX5 (GRN) ID3" source="67314" target="67852" cy:directed="1"/>
      <edge id="80462" label="SIX5 (GRN) TAF6L" source="67314" target="66801" cy:directed="1"/>
      <edge id="80461" label="SIX5 (GRN) TSSC1" source="67314" target="66622" cy:directed="1"/>
      <edge id="80460" label="SIX5 (GRN) PSMB10" source="67314" target="67920" cy:directed="1"/>
      <edge id="80459" label="SIX5 (GRN) ZNF575" source="67314" target="67919" cy:directed="1"/>
      <edge id="80458" label="SIX5 (GRN) B3GNT7" source="67314" target="66828" cy:directed="1"/>
      <edge id="80457" label="SIX5 (GRN) GLYCTK" source="67314" target="66954" cy:directed="1"/>
      <edge id="80456" label="SIX5 (GRN) C1orf85" source="67314" target="66579" cy:directed="1"/>
      <edge id="80455" label="SIX5 (GRN) ATAD3C" source="67314" target="67243" cy:directed="1"/>
      <edge id="80454" label="SIX5 (GRN) PIH1D1" source="67314" target="67828" cy:directed="1"/>
      <edge id="80453" label="SIX5 (GRN) TPD52L2" source="67314" target="66820" cy:directed="1"/>
      <edge id="80452" label="SIX5 (GRN) CCDC97" source="67314" target="67584" cy:directed="1"/>
      <edge id="80451" label="SIX5 (GRN) FOXRED1" source="67314" target="66667" cy:directed="1"/>
      <edge id="80450" label="SIX5 (GRN) MPST" source="67314" target="67918" cy:directed="1"/>
      <edge id="80449" label="SIX5 (GRN) GUCD1" source="67314" target="67183" cy:directed="1"/>
      <edge id="80448" label="SIX5 (GRN) ASCC2" source="67314" target="67664" cy:directed="1"/>
      <edge id="80447" label="SIX5 (GRN) CHRNB1" source="67314" target="67568" cy:directed="1"/>
      <edge id="80446" label="SIX5 (GRN) ACVRL1" source="67314" target="67848" cy:directed="1"/>
      <edge id="80445" label="SIX5 (GRN) SDCCAG3" source="67314" target="66812" cy:directed="1"/>
      <edge id="80444" label="SIX5 (GRN) C17orf62" source="67314" target="66913" cy:directed="1"/>
      <edge id="80443" label="SIX5 (GRN) SHARPIN" source="67314" target="67564" cy:directed="1"/>
      <edge id="80442" label="SIX5 (GRN) NPRL3" source="67314" target="67562" cy:directed="1"/>
      <edge id="80441" label="SIX5 (GRN) PDCD6" source="67314" target="67050" cy:directed="1"/>
      <edge id="80440" label="SIX5 (GRN) TSNARE1" source="67314" target="67917" cy:directed="1"/>
      <edge id="80439" label="SIX5 (GRN) GPX1" source="67314" target="66662" cy:directed="1"/>
      <edge id="80438" label="SIX5 (GRN) MFNG" source="67314" target="67646" cy:directed="1"/>
      <edge id="80437" label="SIX5 (GRN) ASPSCR1" source="67314" target="67770" cy:directed="1"/>
      <edge id="80436" label="SIX5 (GRN) SIRT2" source="67314" target="67558" cy:directed="1"/>
      <edge id="80435" label="SIX5 (GRN) TARS2" source="67314" target="66842" cy:directed="1"/>
      <edge id="80434" label="SIX5 (GRN) ARPC4" source="67314" target="67491" cy:directed="1"/>
      <edge id="80433" label="SIX5 (GRN) ATP13A2" source="67314" target="66727" cy:directed="1"/>
      <edge id="80432" label="SIX5 (GRN) CDK2AP2" source="67314" target="67808" cy:directed="1"/>
      <edge id="80431" label="SIX5 (GRN) TADA3" source="67314" target="67557" cy:directed="1"/>
      <edge id="80430" label="SIX5 (GRN) NUBP2" source="67314" target="67765" cy:directed="1"/>
      <edge id="80429" label="SIX5 (GRN) XKR8" source="67314" target="67523" cy:directed="1"/>
      <edge id="80428" label="SIX5 (GRN) CARD9" source="67314" target="67916" cy:directed="1"/>
      <edge id="80427" label="SIX5 (GRN) ALDH16A1" source="67314" target="67547" cy:directed="1"/>
      <edge id="80426" label="SIX5 (GRN) RGS19" source="67314" target="66616" cy:directed="1"/>
      <edge id="80425" label="SIX5 (GRN) ZDHHC12" source="67314" target="66776" cy:directed="1"/>
      <edge id="80424" label="SIX5 (GRN) MANEAL" source="67314" target="66507" cy:directed="1"/>
      <edge id="80423" label="SIX5 (GRN) THOP1" source="67314" target="67530" cy:directed="1"/>
      <edge id="80422" label="SIX5 (GRN) SIGMAR1" source="67314" target="67915" cy:directed="1"/>
      <edge id="80421" label="SIX5 (GRN) FBXW5" source="67314" target="67528" cy:directed="1"/>
      <edge id="80420" label="SIX5 (GRN) ARPC1B" source="67314" target="66716" cy:directed="1"/>
      <edge id="80419" label="SIX5 (GRN) PYCRL" source="67314" target="66807" cy:directed="1"/>
      <edge id="80418" label="SIX5 (GRN) NUDT22" source="67314" target="67273" cy:directed="1"/>
      <edge id="80417" label="SIX5 (GRN) GLTPD1" source="67314" target="67525" cy:directed="1"/>
      <edge id="80416" label="SIX5 (GRN) CORO1B" source="67314" target="67914" cy:directed="1"/>
      <edge id="80415" label="SIX5 (GRN) SMAD6" source="67314" target="67496" cy:directed="1"/>
      <edge id="80414" label="SIX5 (GRN) SCD" source="67314" target="67138" cy:directed="1"/>
      <edge id="80413" label="SIX5 (GRN) ECH1" source="67314" target="67521" cy:directed="1"/>
      <edge id="80412" label="SIX5 (GRN) PPP1CA" source="67314" target="66696" cy:directed="1"/>
      <edge id="80411" label="SIX5 (GRN) FASTK" source="67314" target="67032" cy:directed="1"/>
      <edge id="80410" label="SIX5 (GRN) VAC14" source="67314" target="67630" cy:directed="1"/>
      <edge id="80409" label="SIX5 (GRN) FIBP" source="67314" target="67077" cy:directed="1"/>
      <edge id="80408" label="SIX5 (GRN) PUS1" source="67314" target="67517" cy:directed="1"/>
      <edge id="80407" label="SIX5 (GRN) IKBKE" source="67314" target="67913" cy:directed="1"/>
      <edge id="80406" label="SIX5 (GRN) IRAK1" source="67314" target="66618" cy:directed="1"/>
      <edge id="80405" label="SIX5 (GRN) FBXO27" source="67314" target="67513" cy:directed="1"/>
      <edge id="80404" label="SIX5 (GRN) NDUFB2" source="67314" target="67758" cy:directed="1"/>
      <edge id="80403" label="SIX5 (GRN) SLC27A3" source="67314" target="67843" cy:directed="1"/>
      <edge id="80402" label="SIX5 (GRN) FERMT3" source="67314" target="67017" cy:directed="1"/>
      <edge id="80401" label="SIX5 (GRN) DDX41" source="67314" target="66794" cy:directed="1"/>
      <edge id="80400" label="SIX5 (GRN) CTSA" source="67314" target="66592" cy:directed="1"/>
      <edge id="80399" label="SIX5 (GRN) C3orf18" source="67314" target="67912" cy:directed="1"/>
      <edge id="80398" label="SIX5 (GRN) LYPLA2" source="67314" target="67911" cy:directed="1"/>
      <edge id="80397" label="SIX5 (GRN) ADCK5" source="67314" target="67509" cy:directed="1"/>
      <edge id="80396" label="SIX5 (GRN) RER1" source="67314" target="66558" cy:directed="1"/>
      <edge id="80395" label="SIX5 (GRN) IPO13" source="67314" target="66874" cy:directed="1"/>
      <edge id="80394" label="SIX5 (GRN) CORO1A" source="67314" target="66922" cy:directed="1"/>
      <edge id="80393" label="SIX5 (GRN) UQCC2" source="67314" target="66918" cy:directed="1"/>
      <edge id="80392" label="SIX5 (GRN) E2F4" source="67314" target="67501" cy:directed="1"/>
      <edge id="80391" label="SIX5 (GRN) SMUG1" source="67314" target="67021" cy:directed="1"/>
      <edge id="80390" label="SIX5 (GRN) NECAB3" source="67314" target="67200" cy:directed="1"/>
      <edge id="80389" label="SIX5 (GRN) C9orf69" source="67314" target="66744" cy:directed="1"/>
      <edge id="80388" label="SIX5 (GRN) SLC12A9" source="67314" target="67492" cy:directed="1"/>
      <edge id="80387" label="SIX5 (GRN) ABCB8" source="67314" target="66653" cy:directed="1"/>
      <edge id="80386" label="SIX5 (GRN) CDK4" source="67314" target="67813" cy:directed="1"/>
      <edge id="80385" label="SIX5 (GRN) LSS" source="67314" target="66566" cy:directed="1"/>
      <edge id="80384" label="SIX5 (GRN) HPS1" source="67314" target="67570" cy:directed="1"/>
      <edge id="80383" label="SIX5 (GRN) RHBDD3" source="67314" target="67619" cy:directed="1"/>
      <edge id="80382" label="SIX5 (GRN) XYLT2" source="67314" target="67910" cy:directed="1"/>
      <edge id="80381" label="SIX5 (GRN) GPAA1" source="67314" target="66841" cy:directed="1"/>
      <edge id="80380" label="SIX5 (GRN) MRPL4" source="67314" target="66731" cy:directed="1"/>
      <edge id="80379" label="SIX5 (GRN) GEMIN7" source="67314" target="66803" cy:directed="1"/>
      <edge id="80378" label="SIX5 (GRN) NSUN5" source="67314" target="67087" cy:directed="1"/>
      <edge id="80377" label="SIX5 (GRN) TMEM79" source="67314" target="66609" cy:directed="1"/>
      <edge id="80376" label="SIX5 (GRN) RAB40C" source="67314" target="67129" cy:directed="1"/>
      <edge id="80375" label="SIX5 (GRN) PSMG3" source="67314" target="66829" cy:directed="1"/>
      <edge id="80374" label="SIX5 (GRN) MRPS12" source="67314" target="66659" cy:directed="1"/>
      <edge id="80373" label="SIX5 (GRN) PIN1" source="67314" target="67069" cy:directed="1"/>
      <edge id="80372" label="SIX5 (GRN) B4GALT7" source="67314" target="66929" cy:directed="1"/>
      <edge id="80371" label="SIX5 (GRN) RCCD1" source="67314" target="66797" cy:directed="1"/>
      <edge id="80370" label="SIX5 (GRN) ABRACL" source="67314" target="66714" cy:directed="1"/>
      <edge id="80369" label="SIX5 (GRN) PNKD" source="67314" target="67131" cy:directed="1"/>
      <edge id="80368" label="SIX5 (GRN) TCF19" source="67314" target="67178" cy:directed="1"/>
      <edge id="80367" label="SIX5 (GRN) SRM" source="67314" target="67323" cy:directed="1"/>
      <edge id="80366" label="SIX5 (GRN) CCDC137" source="67314" target="66826" cy:directed="1"/>
      <edge id="80365" label="SIX5 (GRN) BRAT1" source="67314" target="66821" cy:directed="1"/>
      <edge id="80364" label="SIX5 (GRN) RABEP2" source="67314" target="66748" cy:directed="1"/>
      <edge id="80363" label="SIX5 (GRN) TSR3" source="67314" target="66815" cy:directed="1"/>
      <edge id="80362" label="SIX5 (GRN) PUSL1" source="67314" target="67018" cy:directed="1"/>
      <edge id="80361" label="SIX5 (GRN) FAM195A" source="67314" target="67139" cy:directed="1"/>
      <edge id="80360" label="SIX5 (GRN) CYC1" source="67314" target="67216" cy:directed="1"/>
      <edge id="80359" label="SIX5 (GRN) COQ9" source="67314" target="66576" cy:directed="1"/>
      <edge id="80358" label="SIX5 (GRN) LRRC20" source="67314" target="66915" cy:directed="1"/>
      <edge id="80357" label="SIX5 (GRN) BRI3" source="67314" target="66587" cy:directed="1"/>
      <edge id="80356" label="SIX5 (GRN) TMEM141" source="67314" target="66781" cy:directed="1"/>
      <edge id="80355" label="SIX5 (GRN) FBXL6" source="67314" target="67322" cy:directed="1"/>
      <edge id="80354" label="SIX5 (GRN) TMEM204" source="67314" target="67181" cy:directed="1"/>
      <edge id="80353" label="SIX5 (GRN) ATAD3A" source="67314" target="67321" cy:directed="1"/>
      <edge id="80352" label="SIX5 (GRN) CHID1" source="67314" target="67152" cy:directed="1"/>
      <edge id="80351" label="SIX5 (GRN) TANGO2" source="67314" target="67110" cy:directed="1"/>
      <edge id="80350" label="SIX5 (GRN) ADAP1" source="67314" target="66941" cy:directed="1"/>
      <edge id="80349" label="SIX5 (GRN) MFSD3" source="67314" target="67320" cy:directed="1"/>
      <edge id="80348" label="SIX5 (GRN) APOA1BP" source="67314" target="66674" cy:directed="1"/>
      <edge id="80347" label="SIX5 (GRN) GCAT" source="67314" target="67182" cy:directed="1"/>
      <edge id="80346" label="SIX5 (GRN) DNPH1" source="67314" target="66585" cy:directed="1"/>
      <edge id="80345" label="SIX5 (GRN) TXN2" source="67314" target="66875" cy:directed="1"/>
      <edge id="80344" label="SIX5 (GRN) ATP5G1" source="67314" target="67113" cy:directed="1"/>
      <edge id="80343" label="SIX5 (GRN) CCDC167" source="67314" target="66633" cy:directed="1"/>
      <edge id="80342" label="SIX5 (GRN) UROS" source="67314" target="66634" cy:directed="1"/>
      <edge id="80341" label="SIX5 (GRN) ISOC2" source="67314" target="67082" cy:directed="1"/>
      <edge id="80340" label="SIX5 (GRN) PGLS" source="67314" target="67016" cy:directed="1"/>
      <edge id="80339" label="SIX5 (GRN) DHRS4L2" source="67314" target="66872" cy:directed="1"/>
      <edge id="80338" label="SIX5 (GRN) FAM203A" source="67314" target="66494" cy:directed="1"/>
      <edge id="80337" label="SIX5 (GRN) PCK2" source="67314" target="66478" cy:directed="1"/>
      <edge id="80336" label="SIX5 (GRN) RECQL4" source="67314" target="67319" cy:directed="1"/>
      <edge id="80335" label="SIX5 (GRN) TMEM223" source="67314" target="66677" cy:directed="1"/>
      <edge id="80334" label="SIX5 (GRN) MMAB" source="67314" target="67187" cy:directed="1"/>
      <edge id="80333" label="SIX5 (GRN) SLC27A4" source="67314" target="66905" cy:directed="1"/>
      <edge id="80332" label="SIX5 (GRN) NUDT8" source="67314" target="66996" cy:directed="1"/>
      <edge id="80331" label="SIX5 (GRN) NDUFS7" source="67314" target="67318" cy:directed="1"/>
      <edge id="80330" label="SIX5 (GRN) EGFL7" source="67314" target="66657" cy:directed="1"/>
      <edge id="80329" label="SIX5 (GRN) HSPA12B" source="67314" target="67283" cy:directed="1"/>
      <edge id="80328" label="SIX5 (GRN) FKBP2" source="67314" target="67317" cy:directed="1"/>
      <edge id="80327" label="SIX5 (GRN) YIF1A" source="67314" target="66500" cy:directed="1"/>
      <edge id="80326" label="SIX5 (GRN) APOBR" source="67314" target="66615" cy:directed="1"/>
      <edge id="80325" label="SIX5 (GRN) ABHD11" source="67314" target="67316" cy:directed="1"/>
      <edge id="80324" label="SIX5 (GRN) AKR1A1" source="67314" target="66551" cy:directed="1"/>
      <edge id="80323" label="SIX5 (GRN) CDCA4" source="67314" target="67284" cy:directed="1"/>
      <edge id="80322" label="SIX5 (GRN) DCPS" source="67314" target="66998" cy:directed="1"/>
      <edge id="80321" label="SIX5 (GRN) PTAFR" source="67314" target="66594" cy:directed="1"/>
      <edge id="80320" label="SIX5 (GRN) C19orf24" source="67314" target="66909" cy:directed="1"/>
      <edge id="80319" label="SIX5 (GRN) NUDT16L1" source="67314" target="66997" cy:directed="1"/>
      <edge id="80318" label="SIX5 (GRN) LYL1" source="67314" target="66612" cy:directed="1"/>
      <edge id="80317" label="SIX5 (GRN) FAM173A" source="67314" target="66610" cy:directed="1"/>
      <edge id="80316" label="SIX5 (GRN) TFAP4" source="67314" target="66608" cy:directed="1"/>
      <edge id="80315" label="SIX5 (GRN) AP1S1" source="67314" target="66533" cy:directed="1"/>
      <edge id="80314" label="SIX5 (GRN) APRT" source="67314" target="67315" cy:directed="1"/>
      <edge id="80313" label="SIX5 (GRN) THEM6" source="67314" target="66578" cy:directed="1"/>
      <edge id="80312" label="SIX5 (GRN) PAQR4" source="67314" target="66860" cy:directed="1"/>
      <edge id="80311" label="SIX5 (GRN) RNASEH2A" source="67314" target="66861" cy:directed="1"/>
      <edge id="80310" label="SIX5 (GRN) RENBP" source="67314" target="66555" cy:directed="1"/>
      <edge id="80309" label="SIX5 (GRN) MRPS34" source="67314" target="66532" cy:directed="1"/>
      <edge id="80308" label="SIX5 (GRN) RNH1" source="67314" target="66548" cy:directed="1"/>
      <edge id="80307" label="SIX5 (GRN) LAGE3" source="67314" target="67106" cy:directed="1"/>
      <edge id="80306" label="SIX5 (GRN) PAFAH1B3" source="67314" target="66497" cy:directed="1"/>
      <edge id="80305" label="SIX5 (GRN) SLC25A39" source="67314" target="67101" cy:directed="1"/>
      <edge id="80304" label="SIX5 (GRN) SLC25A11" source="67314" target="66540" cy:directed="1"/>
      <edge id="80303" label="SIX5 (GRN) TWF2" source="67314" target="67091" cy:directed="1"/>
      <edge id="80302" label="SIX5 (GRN) RILP" source="67314" target="66976" cy:directed="1"/>
      <edge id="80301" label="SIX5 (GRN) SIRT7" source="67314" target="66904" cy:directed="1"/>
      <edge id="80300" label="SIX5 (GRN) DTYMK" source="67314" target="66977" cy:directed="1"/>
      <edge id="80299" label="SIX5 (GRN) LAMTOR1" source="67314" target="66982" cy:directed="1"/>
      <edge id="80298" label="SIX5 (GRN) S1PR4" source="67314" target="66499" cy:directed="1"/>
      <edge id="80297" label="SIX5 (GRN) TONSL" source="67314" target="66484" cy:directed="1"/>
      <edge id="80296" label="SIX5 (GRN) SYT15" source="67314" target="66459" cy:directed="1"/>
      <edge id="80295" label="SIX5 (GRN) CDCA5" source="67314" target="66966" cy:directed="1"/>
      <edge id="80294" label="SIX5 (GRN) FLAD1" source="67314" target="66473" cy:directed="1"/>
      <edge id="80293" label="SIX5 (GRN) CCM2L" source="67314" target="66640" cy:directed="1"/>
      <edge id="80292" label="SIX5 (GRN) CISD3" source="67314" target="66971" cy:directed="1"/>
      <edge id="80291" label="SIX5 (GRN) SLC52A2" source="67314" target="66442" cy:directed="1"/>
      <edge id="80290" label="ETV2 (GRN) SMAD6" source="67313" target="67496" cy:directed="1"/>
      <edge id="80289" label="ETV2 (GRN) FAM86A" source="67313" target="66613" cy:directed="1"/>
      <edge id="80288" label="ETV2 (GRN) TSSC1" source="67313" target="66622" cy:directed="1"/>
      <edge id="80287" label="ETV2 (GRN) HMBS" source="67313" target="67006" cy:directed="1"/>
      <edge id="80286" label="ETV2 (GRN) NOC2L" source="67313" target="67746" cy:directed="1"/>
      <edge id="80285" label="ETV2 (GRN) QDPR" source="67313" target="67488" cy:directed="1"/>
      <edge id="80284" label="ETV2 (GRN) DCTPP1" source="67313" target="66619" cy:directed="1"/>
      <edge id="80283" label="ETV2 (GRN) POLR3K" source="67313" target="66684" cy:directed="1"/>
      <edge id="80282" label="ETV2 (GRN) VAC14" source="67313" target="67630" cy:directed="1"/>
      <edge id="80281" label="ETV2 (GRN) C19orf59" source="67313" target="66732" cy:directed="1"/>
      <edge id="80280" label="ETV2 (GRN) ALPL" source="67313" target="67136" cy:directed="1"/>
      <edge id="80279" label="ETV2 (GRN) C1QBP" source="67313" target="66534" cy:directed="1"/>
      <edge id="80278" label="ETV2 (GRN) CDKL2" source="67313" target="67482" cy:directed="1"/>
      <edge id="80277" label="ETV2 (GRN) ABCB8" source="67313" target="66653" cy:directed="1"/>
      <edge id="80276" label="ETV2 (GRN) PABPC1L" source="67313" target="67483" cy:directed="1"/>
      <edge id="80275" label="ETV2 (GRN) ZNF696" source="67313" target="66848" cy:directed="1"/>
      <edge id="80274" label="ETV2 (GRN) MLYCD" source="67313" target="66845" cy:directed="1"/>
      <edge id="80273" label="ETV2 (GRN) MTX2" source="67313" target="66658" cy:directed="1"/>
      <edge id="80272" label="ETV2 (GRN) GBA" source="67313" target="66580" cy:directed="1"/>
      <edge id="80271" label="ETV2 (GRN) DIEXF" source="67313" target="66584" cy:directed="1"/>
      <edge id="80270" label="ETV2 (GRN) ABRACL" source="67313" target="66714" cy:directed="1"/>
      <edge id="80269" label="ETV2 (GRN) COQ9" source="67313" target="66576" cy:directed="1"/>
      <edge id="80268" label="ETV2 (GRN) NUBP1" source="67313" target="66496" cy:directed="1"/>
      <edge id="80267" label="ETV2 (GRN) NFS1" source="67313" target="66760" cy:directed="1"/>
      <edge id="80266" label="ETV2 (GRN) CDK5" source="67313" target="66572" cy:directed="1"/>
      <edge id="80265" label="ETV2 (GRN) TMEM261" source="67313" target="66736" cy:directed="1"/>
      <edge id="80264" label="ETV2 (GRN) GNPDA1" source="67313" target="66639" cy:directed="1"/>
      <edge id="80263" label="ETV2 (GRN) ATP5G1" source="67313" target="67113" cy:directed="1"/>
      <edge id="80262" label="ETV2 (GRN) SFXN4" source="67313" target="66528" cy:directed="1"/>
      <edge id="80261" label="ETV2 (GRN) FAM203A" source="67313" target="66494" cy:directed="1"/>
      <edge id="80260" label="ETV2 (GRN) TMEM223" source="67313" target="66677" cy:directed="1"/>
      <edge id="80259" label="ETV2 (GRN) MLST8" source="67313" target="66565" cy:directed="1"/>
      <edge id="80258" label="ETV2 (GRN) RENBP" source="67313" target="66555" cy:directed="1"/>
      <edge id="80257" label="ETV2 (GRN) PRAM1" source="67313" target="66627" cy:directed="1"/>
      <edge id="80256" label="ETV2 (GRN) SAC3D1" source="67313" target="66542" cy:directed="1"/>
      <edge id="80255" label="ETV2 (GRN) UMPS" source="67313" target="66617" cy:directed="1"/>
      <edge id="80254" label="ETV2 (GRN) TWF2" source="67313" target="67091" cy:directed="1"/>
      <edge id="80253" label="ETV2 (GRN) HM13" source="67313" target="66895" cy:directed="1"/>
      <edge id="80252" label="ETV2 (GRN) NECAB1" source="67313" target="66581" cy:directed="1"/>
      <edge id="80251" label="ETV2 (GRN) VARS" source="67313" target="67151" cy:directed="1"/>
      <edge id="80250" label="ETV2 (GRN) PAFAH1B3" source="67313" target="66497" cy:directed="1"/>
      <edge id="80249" label="ETV2 (GRN) CAPN3" source="67313" target="66524" cy:directed="1"/>
      <edge id="80248" label="DNALI1 (GCN) LRRC46" source="67312" target="67310" cy:directed="1"/>
      <edge id="80247" label="AK8 (GCN) LRRC46" source="67311" target="67310" cy:directed="1"/>
      <edge id="80246" label="LRRC46 (GCN) DYNC2H1" source="67310" target="67977" cy:directed="1"/>
      <edge id="80245" label="LRRC46 (GCN) RABL2B" source="67310" target="67908" cy:directed="1"/>
      <edge id="80244" label="PIH1D2 (GCN) LRRC46" source="67309" target="67310" cy:directed="1"/>
      <edge id="80243" label="C1orf192 (GCN) IGSF9" source="67308" target="67409" cy:directed="1"/>
      <edge id="80242" label="C1orf192 (GCN) PPAP2C" source="67308" target="67368" cy:directed="1"/>
      <edge id="80241" label="C1orf192 (GCN) CCDC180" source="67308" target="67354" cy:directed="1"/>
      <edge id="80240" label="C1orf192 (GCN) FAM227A" source="67308" target="67400" cy:directed="1"/>
      <edge id="80239" label="C1orf192 (GCN) SIX1" source="67308" target="67374" cy:directed="1"/>
      <edge id="80238" label="C1orf192 (GCN) KIF24" source="67308" target="67930" cy:directed="1"/>
      <edge id="80237" label="C1orf192 (GCN) LRRC46" source="67308" target="67310" cy:directed="1"/>
      <edge id="80236" label="LRRC48 (GCN) SIX4" source="67307" target="67406" cy:directed="1"/>
      <edge id="80235" label="LRRC48 (GCN) SIX1" source="67307" target="67374" cy:directed="1"/>
      <edge id="80234" label="LRRC48 (GCN) PPAP2C" source="67307" target="67368" cy:directed="1"/>
      <edge id="80233" label="LRRC48 (GCN) MOK" source="67307" target="67931" cy:directed="1"/>
      <edge id="80232" label="LRRC48 (GCN) KIF24" source="67307" target="67930" cy:directed="1"/>
      <edge id="80231" label="LRRC48 (GCN) ARHGAP39" source="67307" target="67359" cy:directed="1"/>
      <edge id="80230" label="LRRC48 (GCN) CCDC74A" source="67307" target="67392" cy:directed="1"/>
      <edge id="80229" label="LRRC48 (GCN) ANKRD54" source="67307" target="67909" cy:directed="1"/>
      <edge id="80228" label="LRRC48 (GCN) LRRC46" source="67307" target="67310" cy:directed="1"/>
      <edge id="80227" label="ZHX1 (GRN) NUBP1" source="67306" target="66496" cy:directed="1"/>
      <edge id="80226" label="ZHX1 (GRN) JAGN1" source="67306" target="66847" cy:directed="1"/>
      <edge id="80225" label="ZHX1 (GRN) ANKRD54" source="67306" target="67909" cy:directed="1"/>
      <edge id="80224" label="ZHX1 (GRN) EBNA1BP2" source="67306" target="67861" cy:directed="1"/>
      <edge id="80223" label="ZHX1 (GRN) RABL2B" source="67306" target="67908" cy:directed="1"/>
      <edge id="80222" label="ZHX1 (GRN) CCT3" source="67306" target="66440" cy:directed="1"/>
      <edge id="80221" label="ZHX1 (GRN) DNALI1" source="67306" target="67312" cy:directed="1"/>
      <edge id="80220" label="ZHX1 (GRN) AK8" source="67306" target="67311" cy:directed="1"/>
      <edge id="80219" label="ZHX1 (GRN) LRRC46" source="67306" target="67310" cy:directed="1"/>
      <edge id="80218" label="ZHX1 (GRN) PIH1D2" source="67306" target="67309" cy:directed="1"/>
      <edge id="80217" label="ZHX1 (GRN) C1orf192" source="67306" target="67308" cy:directed="1"/>
      <edge id="80216" label="ZHX1 (GRN) LRRC48" source="67306" target="67307" cy:directed="1"/>
      <edge id="80215" label="THAP1 (GRN) CNPY2" source="67305" target="67214" cy:directed="1"/>
      <edge id="80214" label="THAP1 (GRN) MRPL3" source="67305" target="66465" cy:directed="1"/>
      <edge id="80213" label="THAP1 (GRN) MIS18A" source="67305" target="66480" cy:directed="1"/>
      <edge id="80212" label="THAP1 (GRN) LYRM2" source="67305" target="66457" cy:directed="1"/>
      <edge id="80211" label="PRIM2 (GCN) CDC20" source="67304" target="67264" cy:directed="1"/>
      <edge id="80210" label="PRIM2 (GCN) AURKA" source="67304" target="66969" cy:directed="1"/>
      <edge id="80209" label="EMC3 (GCN) SLC25A10" source="67303" target="66446" cy:directed="1"/>
      <edge id="80208" label="PTK7 (GCN) CDC20" source="67302" target="67264" cy:directed="1"/>
      <edge id="80207" label="ZBTB42 (GCN) SLC25A10" source="67301" target="66446" cy:directed="1"/>
      <edge id="80206" label="TFEB (GRN) CDC123" source="67300" target="66811" cy:directed="1"/>
      <edge id="80205" label="TFEB (GRN) MRPS23" source="67300" target="66738" cy:directed="1"/>
      <edge id="80204" label="TFEB (GRN) JAGN1" source="67300" target="66847" cy:directed="1"/>
      <edge id="80203" label="TFEB (GRN) ZBTB8OS" source="67300" target="67638" cy:directed="1"/>
      <edge id="80202" label="TFEB (GRN) LSM5" source="67300" target="67063" cy:directed="1"/>
      <edge id="80201" label="TFEB (GRN) POLR3C" source="67300" target="67612" cy:directed="1"/>
      <edge id="80200" label="TFEB (GRN) UBE2L3" source="67300" target="67907" cy:directed="1"/>
      <edge id="80199" label="TFEB (GRN) KIAA1522" source="67300" target="67218" cy:directed="1"/>
      <edge id="80198" label="TFEB (GRN) QDPR" source="67300" target="67488" cy:directed="1"/>
      <edge id="80197" label="TFEB (GRN) NDUFV3" source="67300" target="67798" cy:directed="1"/>
      <edge id="80196" label="TFEB (GRN) SMUG1" source="67300" target="67021" cy:directed="1"/>
      <edge id="80195" label="TFEB (GRN) PCBD2" source="67300" target="66740" cy:directed="1"/>
      <edge id="80194" label="TFEB (GRN) SLC35A4" source="67300" target="66607" cy:directed="1"/>
      <edge id="80193" label="TFEB (GRN) FTSJ2" source="67300" target="66739" cy:directed="1"/>
      <edge id="80192" label="TFEB (GRN) TMEM192" source="67300" target="67518" cy:directed="1"/>
      <edge id="80191" label="TFEB (GRN) DHDDS" source="67300" target="66916" cy:directed="1"/>
      <edge id="80190" label="TFEB (GRN) PSMC2" source="67300" target="66767" cy:directed="1"/>
      <edge id="80189" label="TFEB (GRN) SDHC" source="67300" target="66950" cy:directed="1"/>
      <edge id="80188" label="TFEB (GRN) DCLRE1A" source="67300" target="67326" cy:directed="1"/>
      <edge id="80187" label="TFEB (GRN) CHAC2" source="67300" target="67618" cy:directed="1"/>
      <edge id="80186" label="TFEB (GRN) PSMG1" source="67300" target="67522" cy:directed="1"/>
      <edge id="80185" label="TFEB (GRN) VPS33A" source="67300" target="66802" cy:directed="1"/>
      <edge id="80184" label="TFEB (GRN) SUV39H1" source="67300" target="67722" cy:directed="1"/>
      <edge id="80183" label="TFEB (GRN) FASTKD5" source="67300" target="67869" cy:directed="1"/>
      <edge id="80182" label="TFEB (GRN) ADSL" source="67300" target="66651" cy:directed="1"/>
      <edge id="80181" label="TFEB (GRN) NDUFAF1" source="67300" target="67083" cy:directed="1"/>
      <edge id="80180" label="TFEB (GRN) MMACHC" source="67300" target="66647" cy:directed="1"/>
      <edge id="80179" label="TFEB (GRN) ARPC1B" source="67300" target="66716" cy:directed="1"/>
      <edge id="80178" label="TFEB (GRN) GEMIN6" source="67300" target="67089" cy:directed="1"/>
      <edge id="80177" label="TFEB (GRN) POLR3K" source="67300" target="66684" cy:directed="1"/>
      <edge id="80176" label="TFEB (GRN) MRPS33" source="67300" target="66624" cy:directed="1"/>
      <edge id="80175" label="TFEB (GRN) TXNDC5" source="67300" target="67871" cy:directed="1"/>
      <edge id="80174" label="TFEB (GRN) BCCIP" source="67300" target="67881" cy:directed="1"/>
      <edge id="80173" label="TFEB (GRN) POLR2D" source="67300" target="67034" cy:directed="1"/>
      <edge id="80172" label="TFEB (GRN) NUDT5" source="67300" target="66924" cy:directed="1"/>
      <edge id="80171" label="TFEB (GRN) FADD" source="67300" target="66921" cy:directed="1"/>
      <edge id="80170" label="TFEB (GRN) SDSL" source="67300" target="67906" cy:directed="1"/>
      <edge id="80169" label="TFEB (GRN) SNTB1" source="67300" target="67611" cy:directed="1"/>
      <edge id="80168" label="TFEB (GRN) C6orf211" source="67300" target="67256" cy:directed="1"/>
      <edge id="80167" label="TFEB (GRN) CBS" source="67300" target="67494" cy:directed="1"/>
      <edge id="80166" label="TFEB (GRN) EIF4EBP1" source="67300" target="67905" cy:directed="1"/>
      <edge id="80165" label="TFEB (GRN) TSFM" source="67300" target="66750" cy:directed="1"/>
      <edge id="80164" label="TFEB (GRN) EXO5" source="67300" target="66703" cy:directed="1"/>
      <edge id="80163" label="TFEB (GRN) EIF3B" source="67300" target="67510" cy:directed="1"/>
      <edge id="80162" label="TFEB (GRN) TDRKH" source="67300" target="66621" cy:directed="1"/>
      <edge id="80161" label="TFEB (GRN) SLC30A6" source="67300" target="67166" cy:directed="1"/>
      <edge id="80160" label="TFEB (GRN) HMBS" source="67300" target="67006" cy:directed="1"/>
      <edge id="80159" label="TFEB (GRN) GTF3C6" source="67300" target="66775" cy:directed="1"/>
      <edge id="80158" label="TFEB (GRN) TRUB2" source="67300" target="66987" cy:directed="1"/>
      <edge id="80157" label="TFEB (GRN) DOLPP1" source="67300" target="66492" cy:directed="1"/>
      <edge id="80156" label="TFEB (GRN) UQCRQ" source="67300" target="67228" cy:directed="1"/>
      <edge id="80155" label="TFEB (GRN) IRAK1" source="67300" target="66618" cy:directed="1"/>
      <edge id="80154" label="TFEB (GRN) ATP5G3" source="67300" target="66543" cy:directed="1"/>
      <edge id="80153" label="TFEB (GRN) PARN" source="67300" target="67495" cy:directed="1"/>
      <edge id="80152" label="TFEB (GRN) MRPS18B" source="67300" target="67904" cy:directed="1"/>
      <edge id="80151" label="TFEB (GRN) RPP40" source="67300" target="66644" cy:directed="1"/>
      <edge id="80150" label="TFEB (GRN) CENPH" source="67300" target="66539" cy:directed="1"/>
      <edge id="80149" label="TFEB (GRN) PSKH1" source="67300" target="67683" cy:directed="1"/>
      <edge id="80148" label="TFEB (GRN) MRPS16" source="67300" target="67239" cy:directed="1"/>
      <edge id="80147" label="TFEB (GRN) PRODH" source="67300" target="67857" cy:directed="1"/>
      <edge id="80146" label="TFEB (GRN) KARS" source="67300" target="67486" cy:directed="1"/>
      <edge id="80145" label="TFEB (GRN) ST14" source="67300" target="66791" cy:directed="1"/>
      <edge id="80144" label="TFEB (GRN) GALNT10" source="67300" target="67248" cy:directed="1"/>
      <edge id="80143" label="TFEB (GRN) C19orf59" source="67300" target="66732" cy:directed="1"/>
      <edge id="80142" label="TFEB (GRN) C19orf54" source="67300" target="67854" cy:directed="1"/>
      <edge id="80141" label="TFEB (GRN) CPT2" source="67300" target="66770" cy:directed="1"/>
      <edge id="80140" label="TFEB (GRN) FICD" source="67300" target="66894" cy:directed="1"/>
      <edge id="80139" label="TFEB (GRN) ALG3" source="67300" target="66476" cy:directed="1"/>
      <edge id="80138" label="TFEB (GRN) CHAF1A" source="67300" target="67053" cy:directed="1"/>
      <edge id="80137" label="TFEB (GRN) ZSWIM1" source="67300" target="67070" cy:directed="1"/>
      <edge id="80136" label="TFEB (GRN) NIF3L1" source="67300" target="66806" cy:directed="1"/>
      <edge id="80135" label="TFEB (GRN) DCTN5" source="67300" target="67093" cy:directed="1"/>
      <edge id="80134" label="TFEB (GRN) DRAM1" source="67300" target="66490" cy:directed="1"/>
      <edge id="80133" label="TFEB (GRN) C10orf2" source="67300" target="66837" cy:directed="1"/>
      <edge id="80132" label="TFEB (GRN) C16orf70" source="67300" target="66928" cy:directed="1"/>
      <edge id="80131" label="TFEB (GRN) OPLAH" source="67300" target="67055" cy:directed="1"/>
      <edge id="80130" label="TFEB (GRN) SWSAP1" source="67300" target="67090" cy:directed="1"/>
      <edge id="80129" label="TFEB (GRN) EEF1E1" source="67300" target="67220" cy:directed="1"/>
      <edge id="80128" label="TFEB (GRN) HARBI1" source="67300" target="67051" cy:directed="1"/>
      <edge id="80127" label="TFEB (GRN) PRIM2" source="67300" target="67304" cy:directed="1"/>
      <edge id="80126" label="TFEB (GRN) GUCD1" source="67300" target="67183" cy:directed="1"/>
      <edge id="80125" label="TFEB (GRN) TMA16" source="67300" target="67043" cy:directed="1"/>
      <edge id="80124" label="TFEB (GRN) RAB20" source="67300" target="67219" cy:directed="1"/>
      <edge id="80123" label="TFEB (GRN) KANK1" source="67300" target="67146" cy:directed="1"/>
      <edge id="80122" label="TFEB (GRN) ARHGEF19" source="67300" target="66709" cy:directed="1"/>
      <edge id="80121" label="TFEB (GRN) CISD2" source="67300" target="66757" cy:directed="1"/>
      <edge id="80120" label="TFEB (GRN) NSDHL" source="67300" target="66908" cy:directed="1"/>
      <edge id="80119" label="TFEB (GRN) WDR89" source="67300" target="67114" cy:directed="1"/>
      <edge id="80118" label="TFEB (GRN) PDCD6" source="67300" target="67050" cy:directed="1"/>
      <edge id="80117" label="TFEB (GRN) PCCB" source="67300" target="66759" cy:directed="1"/>
      <edge id="80116" label="TFEB (GRN) MACROD2" source="67300" target="66598" cy:directed="1"/>
      <edge id="80115" label="TFEB (GRN) FAM103A1" source="67300" target="66784" cy:directed="1"/>
      <edge id="80114" label="TFEB (GRN) FAM86C1" source="67300" target="66631" cy:directed="1"/>
      <edge id="80113" label="TFEB (GRN) CHCHD1" source="67300" target="66923" cy:directed="1"/>
      <edge id="80112" label="TFEB (GRN) SEPHS2" source="67300" target="66656" cy:directed="1"/>
      <edge id="80111" label="TFEB (GRN) DIEXF" source="67300" target="66584" cy:directed="1"/>
      <edge id="80110" label="TFEB (GRN) EMC3" source="67300" target="67303" cy:directed="1"/>
      <edge id="80109" label="TFEB (GRN) PLIN5" source="67300" target="66741" cy:directed="1"/>
      <edge id="80108" label="TFEB (GRN) METTL2A" source="67300" target="67215" cy:directed="1"/>
      <edge id="80107" label="TFEB (GRN) ACAA2" source="67300" target="66939" cy:directed="1"/>
      <edge id="80106" label="TFEB (GRN) CNIH4" source="67300" target="67107" cy:directed="1"/>
      <edge id="80105" label="TFEB (GRN) PHYH" source="67300" target="67211" cy:directed="1"/>
      <edge id="80104" label="TFEB (GRN) COX5A" source="67300" target="66611" cy:directed="1"/>
      <edge id="80103" label="TFEB (GRN) PDIA6" source="67300" target="67120" cy:directed="1"/>
      <edge id="80102" label="TFEB (GRN) ACOT1" source="67300" target="66931" cy:directed="1"/>
      <edge id="80101" label="TFEB (GRN) FAM118B" source="67300" target="66936" cy:directed="1"/>
      <edge id="80100" label="TFEB (GRN) SSBP1" source="67300" target="66636" cy:directed="1"/>
      <edge id="80099" label="TFEB (GRN) PTK7" source="67300" target="67302" cy:directed="1"/>
      <edge id="80098" label="TFEB (GRN) NUDT8" source="67300" target="66996" cy:directed="1"/>
      <edge id="80097" label="TFEB (GRN) ISCA2" source="67300" target="66721" cy:directed="1"/>
      <edge id="80096" label="TFEB (GRN) SERPINF2" source="67300" target="67177" cy:directed="1"/>
      <edge id="80095" label="TFEB (GRN) MTRR" source="67300" target="67208" cy:directed="1"/>
      <edge id="80094" label="TFEB (GRN) SLC7A7" source="67300" target="66683" cy:directed="1"/>
      <edge id="80093" label="TFEB (GRN) DYX1C1" source="67300" target="66654" cy:directed="1"/>
      <edge id="80092" label="TFEB (GRN) SEC23B" source="67300" target="66650" cy:directed="1"/>
      <edge id="80091" label="TFEB (GRN) FRAT1" source="67300" target="66920" cy:directed="1"/>
      <edge id="80090" label="TFEB (GRN) CDK5" source="67300" target="66572" cy:directed="1"/>
      <edge id="80089" label="TFEB (GRN) SCD" source="67300" target="67138" cy:directed="1"/>
      <edge id="80088" label="TFEB (GRN) RABIF" source="67300" target="67000" cy:directed="1"/>
      <edge id="80087" label="TFEB (GRN) SYS1" source="67300" target="66590" cy:directed="1"/>
      <edge id="80086" label="TFEB (GRN) HYLS1" source="67300" target="66582" cy:directed="1"/>
      <edge id="80085" label="TFEB (GRN) MRPL15" source="67300" target="66626" cy:directed="1"/>
      <edge id="80084" label="TFEB (GRN) POLDIP2" source="67300" target="66859" cy:directed="1"/>
      <edge id="80083" label="TFEB (GRN) MED8" source="67300" target="67103" cy:directed="1"/>
      <edge id="80082" label="TFEB (GRN) FASN" source="67300" target="67205" cy:directed="1"/>
      <edge id="80081" label="TFEB (GRN) CNP" source="67300" target="67080" cy:directed="1"/>
      <edge id="80080" label="TFEB (GRN) ALOX15B" source="67300" target="67198" cy:directed="1"/>
      <edge id="80079" label="TFEB (GRN) C9orf156" source="67300" target="66595" cy:directed="1"/>
      <edge id="80078" label="TFEB (GRN) RNASEH2A" source="67300" target="66861" cy:directed="1"/>
      <edge id="80077" label="TFEB (GRN) DAP3" source="67300" target="66538" cy:directed="1"/>
      <edge id="80076" label="TFEB (GRN) SRD5A1" source="67300" target="66866" cy:directed="1"/>
      <edge id="80075" label="TFEB (GRN) SNX25" source="67300" target="66437" cy:directed="1"/>
      <edge id="80074" label="TFEB (GRN) TMEM69" source="67300" target="66536" cy:directed="1"/>
      <edge id="80073" label="TFEB (GRN) SCIMP" source="67300" target="67099" cy:directed="1"/>
      <edge id="80072" label="TFEB (GRN) CPSF3" source="67300" target="66575" cy:directed="1"/>
      <edge id="80071" label="TFEB (GRN) DPP3" source="67300" target="66523" cy:directed="1"/>
      <edge id="80070" label="TFEB (GRN) SRD5A3" source="67300" target="66591" cy:directed="1"/>
      <edge id="80069" label="TFEB (GRN) CD300LF" source="67300" target="66552" cy:directed="1"/>
      <edge id="80068" label="TFEB (GRN) EPDR1" source="67300" target="66466" cy:directed="1"/>
      <edge id="80067" label="TFEB (GRN) SFXN4" source="67300" target="66528" cy:directed="1"/>
      <edge id="80066" label="TFEB (GRN) FZD5" source="67300" target="67201" cy:directed="1"/>
      <edge id="80065" label="TFEB (GRN) SLC39A11" source="67300" target="67078" cy:directed="1"/>
      <edge id="80064" label="TFEB (GRN) SLC31A2" source="67300" target="67199" cy:directed="1"/>
      <edge id="80063" label="TFEB (GRN) PAQR4" source="67300" target="66860" cy:directed="1"/>
      <edge id="80062" label="TFEB (GRN) CDC20" source="67300" target="67264" cy:directed="1"/>
      <edge id="80061" label="TFEB (GRN) POLR2C" source="67300" target="66527" cy:directed="1"/>
      <edge id="80060" label="TFEB (GRN) FITM2" source="67300" target="66453" cy:directed="1"/>
      <edge id="80059" label="TFEB (GRN) TLCD1" source="67300" target="67130" cy:directed="1"/>
      <edge id="80058" label="TFEB (GRN) RILP" source="67300" target="66976" cy:directed="1"/>
      <edge id="80057" label="TFEB (GRN) CDCA4" source="67300" target="67284" cy:directed="1"/>
      <edge id="80056" label="TFEB (GRN) GSTA4" source="67300" target="66512" cy:directed="1"/>
      <edge id="80055" label="TFEB (GRN) APEH" source="67300" target="66506" cy:directed="1"/>
      <edge id="80054" label="TFEB (GRN) FEN1" source="67300" target="67098" cy:directed="1"/>
      <edge id="80053" label="TFEB (GRN) AP1S1" source="67300" target="66533" cy:directed="1"/>
      <edge id="80052" label="TFEB (GRN) TTC39A" source="67300" target="66495" cy:directed="1"/>
      <edge id="80051" label="TFEB (GRN) ALOX5AP" source="67300" target="66855" cy:directed="1"/>
      <edge id="80050" label="TFEB (GRN) B9D2" source="67300" target="66858" cy:directed="1"/>
      <edge id="80049" label="TFEB (GRN) C21orf33" source="67300" target="66483" cy:directed="1"/>
      <edge id="80048" label="TFEB (GRN) MIS18A" source="67300" target="66480" cy:directed="1"/>
      <edge id="80047" label="TFEB (GRN) MCM2" source="67300" target="66444" cy:directed="1"/>
      <edge id="80046" label="TFEB (GRN) AAR2" source="67300" target="66472" cy:directed="1"/>
      <edge id="80045" label="TFEB (GRN) SLC25A10" source="67300" target="66446" cy:directed="1"/>
      <edge id="80044" label="TFEB (GRN) LAMP3" source="67300" target="67126" cy:directed="1"/>
      <edge id="80043" label="TFEB (GRN) ALG1" source="67300" target="66441" cy:directed="1"/>
      <edge id="80042" label="TFEB (GRN) LYRM2" source="67300" target="66457" cy:directed="1"/>
      <edge id="80041" label="TFEB (GRN) MRPL3" source="67300" target="66465" cy:directed="1"/>
      <edge id="80040" label="TFEB (GRN) MPDU1" source="67300" target="66449" cy:directed="1"/>
      <edge id="80039" label="TFEB (GRN) ZBTB42" source="67300" target="67301" cy:directed="1"/>
      <edge id="80038" label="TFEB (GRN) AURKA" source="67300" target="66969" cy:directed="1"/>
      <edge id="80037" label="TFEB (GRN) CCT3" source="67300" target="66440" cy:directed="1"/>
      <edge id="80036" label="STAT3 (GRN) MED8" source="67299" target="67103" cy:directed="1"/>
      <edge id="80035" label="STAT3 (GRN) C10orf2" source="67299" target="66837" cy:directed="1"/>
      <edge id="80034" label="COX8A (GCN) SAPCD2" source="67298" target="66447" cy:directed="1"/>
      <edge id="80033" label="B3GALT6 (GCN) SAPCD2" source="67297" target="66447" cy:directed="1"/>
      <edge id="80032" label="UNG (GCN) SAPCD2" source="67296" target="66447" cy:directed="1"/>
      <edge id="80031" label="RMND5B (GCN) TIMELESS" source="67295" target="66451" cy:directed="1"/>
      <edge id="80030" label="GPI (GCN) SAPCD2" source="67294" target="66447" cy:directed="1"/>
      <edge id="80029" label="MTIF2 (GCN) SAPCD2" source="67293" target="66447" cy:directed="1"/>
      <edge id="80028" label="G6PC3 (GCN) SAPCD2" source="67292" target="66447" cy:directed="1"/>
      <edge id="80027" label="POP4 (GCN) TMEM177" source="67291" target="66460" cy:directed="1"/>
      <edge id="80026" label="RP4-758J18.2 (GCN) SAPCD2" source="67290" target="66447" cy:directed="1"/>
      <edge id="80025" label="RFT1 (GCN) C16orf59" source="67289" target="66443" cy:directed="1"/>
      <edge id="80024" label="RFT1 (GCN) SAPCD2" source="67289" target="66447" cy:directed="1"/>
      <edge id="80023" label="MCTS1 (GCN) SAPCD2" source="67288" target="66447" cy:directed="1"/>
      <edge id="80022" label="MCTS1 (GCN) TIMELESS" source="67288" target="66451" cy:directed="1"/>
      <edge id="80021" label="MCTS1 (GCN) CD33" source="67288" target="66550" cy:directed="1"/>
      <edge id="80020" label="MCTS1 (GCN) DENR" source="67288" target="66666" cy:directed="1"/>
      <edge id="80019" label="MCTS1 (GCN) CHEK1" source="67288" target="67282" cy:directed="1"/>
      <edge id="80018" label="SLC35B2 (GCN) TIMELESS" source="67287" target="66451" cy:directed="1"/>
      <edge id="80017" label="SLC35B2 (GCN) SAPCD2" source="67287" target="66447" cy:directed="1"/>
      <edge id="80016" label="SLC35B2 (GCN) CHEK1" source="67287" target="67282" cy:directed="1"/>
      <edge id="80015" label="DUOXA1 (GCN) C2" source="67286" target="66509" cy:directed="1"/>
      <edge id="80014" label="EPRS (GCN) VEPH1" source="67285" target="67328" cy:directed="1"/>
      <edge id="80013" label="EPRS (GCN) MRPL3" source="67285" target="66465" cy:directed="1"/>
      <edge id="80012" label="EPRS (GCN) SAPCD2" source="67285" target="66447" cy:directed="1"/>
      <edge id="80011" label="EPRS (GCN) KIF4A" source="67285" target="67072" cy:directed="1"/>
      <edge id="80010" label="EPRS (GCN) CHEK1" source="67285" target="67282" cy:directed="1"/>
      <edge id="80009" label="EPRS (GCN) TMEM177" source="67285" target="66460" cy:directed="1"/>
      <edge id="80008" label="EPRS (GCN) CSTF2" source="67285" target="66556" cy:directed="1"/>
      <edge id="80007" label="EPRS (GCN) PCNA" source="67285" target="66553" cy:directed="1"/>
      <edge id="80006" label="EPRS (GCN) WDR12" source="67285" target="66474" cy:directed="1"/>
      <edge id="80005" label="EPRS (GCN) PSAT1" source="67285" target="66978" cy:directed="1"/>
      <edge id="80004" label="EPRS (GCN) TIMELESS" source="67285" target="66451" cy:directed="1"/>
      <edge id="80003" label="CDCA4 (GCN) RECQL4" source="67284" target="67319" cy:directed="1"/>
      <edge id="80002" label="CDCA4 (GCN) PAFAH1B3" source="67284" target="66497" cy:directed="1"/>
      <edge id="80001" label="CDCA4 (GCN) PSMG3" source="67284" target="66829" cy:directed="1"/>
      <edge id="80000" label="CDCA4 (GCN) FLAD1" source="67284" target="66473" cy:directed="1"/>
      <edge id="79999" label="CDCA4 (GCN) SLC52A2" source="67284" target="66442" cy:directed="1"/>
      <edge id="79998" label="CDCA4 (GCN) AP1S1" source="67284" target="66533" cy:directed="1"/>
      <edge id="79997" label="CDCA4 (GCN) AURKA" source="67284" target="66969" cy:directed="1"/>
      <edge id="79996" label="CDCA4 (GCN) S1PR4" source="67284" target="66499" cy:directed="1"/>
      <edge id="79995" label="CDCA4 (GCN) TONSL" source="67284" target="66484" cy:directed="1"/>
      <edge id="79994" label="CDCA4 (GCN) FOXM1" source="67284" target="66970" cy:directed="1"/>
      <edge id="79993" label="CDCA4 (GCN) CHEK1" source="67284" target="67282" cy:directed="1"/>
      <edge id="79992" label="HSPA12B (GCN) MFNG" source="67283" target="67646" cy:directed="1"/>
      <edge id="79991" label="HSPA12B (GCN) ACVRL1" source="67283" target="67848" cy:directed="1"/>
      <edge id="79990" label="HSPA12B (GCN) SMAD6" source="67283" target="67496" cy:directed="1"/>
      <edge id="79989" label="HSPA12B (GCN) SLC9A3R2" source="67283" target="67805" cy:directed="1"/>
      <edge id="79988" label="CHEK1 (GCN) AIMP2" source="67282" target="66782" cy:directed="1"/>
      <edge id="79987" label="CHEK1 (GCN) WBSCR16" source="67282" target="66717" cy:directed="1"/>
      <edge id="79986" label="CHEK1 (GCN) SEC13" source="67282" target="66508" cy:directed="1"/>
      <edge id="79985" label="CHEK1 (GCN) VPS33A" source="67282" target="66802" cy:directed="1"/>
      <edge id="79984" label="CHEK1 (GCN) LSM4" source="67282" target="67903" cy:directed="1"/>
      <edge id="79983" label="CHEK1 (GCN) NDUFS8" source="67282" target="67084" cy:directed="1"/>
      <edge id="79982" label="CHEK1 (GCN) ITPA" source="67282" target="66672" cy:directed="1"/>
      <edge id="79981" label="CHEK1 (GCN) C16orf95" source="67282" target="67279" cy:directed="1"/>
      <edge id="79980" label="CHEK1 (GCN) RFT1" source="67282" target="67289" cy:directed="1"/>
      <edge id="79979" label="CHEK1 (GCN) PSAT1" source="67282" target="66978" cy:directed="1"/>
      <edge id="79978" label="CHEK1 (GCN) NUDT22" source="67282" target="67273" cy:directed="1"/>
      <edge id="79977" label="CHEK1 (GCN) THAP8" source="67282" target="66795" cy:directed="1"/>
      <edge id="79976" label="CHEK1 (GCN) ZNF691" source="67282" target="67247" cy:directed="1"/>
      <edge id="79975" label="CHEK1 (GCN) IDH1" source="67282" target="66772" cy:directed="1"/>
      <edge id="79974" label="CHEK1 (GCN) MRPS12" source="67282" target="66659" cy:directed="1"/>
      <edge id="79973" label="CHEK1 (GCN) ACBD6" source="67282" target="66792" cy:directed="1"/>
      <edge id="79972" label="CHEK1 (GCN) ASAH2B" source="67282" target="66818" cy:directed="1"/>
      <edge id="79971" label="CHEK1 (GCN) SCAMP3" source="67282" target="66778" cy:directed="1"/>
      <edge id="79970" label="CHEK1 (GCN) RHBDD3" source="67282" target="67619" cy:directed="1"/>
      <edge id="79969" label="CHEK1 (GCN) NDC1" source="67282" target="66605" cy:directed="1"/>
      <edge id="79968" label="CHEK1 (GCN) SDHC" source="67282" target="66950" cy:directed="1"/>
      <edge id="79967" label="CHEK1 (GCN) OST4" source="67282" target="67900" cy:directed="1"/>
      <edge id="79966" label="CHEK1 (GCN) DENR" source="67282" target="66666" cy:directed="1"/>
      <edge id="79965" label="CHEK1 (GCN) DHTKD1" source="67282" target="67699" cy:directed="1"/>
      <edge id="79964" label="CHEK1 (GCN) BLOC1S4" source="67282" target="66710" cy:directed="1"/>
      <edge id="79963" label="CHEK1 (GCN) PPP1CA" source="67282" target="66696" cy:directed="1"/>
      <edge id="79962" label="CHEK1 (GCN) RPUSD1" source="67282" target="66991" cy:directed="1"/>
      <edge id="79961" label="CHEK1 (GCN) SMUG1" source="67282" target="67021" cy:directed="1"/>
      <edge id="79960" label="CHEK1 (GCN) COPG1" source="67282" target="66547" cy:directed="1"/>
      <edge id="79959" label="CHEK1 (GCN) MRPL35" source="67282" target="66927" cy:directed="1"/>
      <edge id="79958" label="CHEK1 (GCN) IARS2" source="67282" target="67834" cy:directed="1"/>
      <edge id="79957" label="CHEK1 (GCN) UNG" source="67282" target="67296" cy:directed="1"/>
      <edge id="79956" label="CHEK1 (GCN) COA6" source="67282" target="66953" cy:directed="1"/>
      <edge id="79955" label="CHEK1 (GCN) ECHS1" source="67282" target="66645" cy:directed="1"/>
      <edge id="79954" label="CHEK1 (GCN) SNAP47" source="67282" target="67033" cy:directed="1"/>
      <edge id="79953" label="CHEK1 (GCN) DECR2" source="67282" target="67062" cy:directed="1"/>
      <edge id="79952" label="CHEK1 (GCN) EXOSC5" source="67282" target="66864" cy:directed="1"/>
      <edge id="79951" label="CHEK1 (GCN) MRPL44" source="67282" target="66707" cy:directed="1"/>
      <edge id="79950" label="CHEK1 (GCN) BRI3BP" source="67282" target="66995" cy:directed="1"/>
      <edge id="79949" label="CHEK1 (GCN) KLHL12" source="67282" target="66944" cy:directed="1"/>
      <edge id="79948" label="CHEK1 (GCN) ARHGEF19" source="67282" target="66709" cy:directed="1"/>
      <edge id="79947" label="CHEK1 (GCN) MMACHC" source="67282" target="66647" cy:directed="1"/>
      <edge id="79946" label="CHEK1 (GCN) TXNDC17" source="67282" target="67097" cy:directed="1"/>
      <edge id="79945" label="CHEK1 (GCN) FUNDC1" source="67282" target="66652" cy:directed="1"/>
      <edge id="79944" label="CHEK1 (GCN) PDZD11" source="67282" target="67803" cy:directed="1"/>
      <edge id="79943" label="CHEK1 (GCN) NABP2" source="67282" target="67073" cy:directed="1"/>
      <edge id="79942" label="CHEK1 (GCN) MTIF2" source="67282" target="67293" cy:directed="1"/>
      <edge id="79941" label="CHEK1 (GCN) FAM86A" source="67282" target="66613" cy:directed="1"/>
      <edge id="79940" label="CHEK1 (GCN) MTCH2" source="67282" target="66937" cy:directed="1"/>
      <edge id="79939" label="CHEK1 (GCN) LCMT1" source="67282" target="66765" cy:directed="1"/>
      <edge id="79938" label="CHEK1 (GCN) MRPL15" source="67282" target="66626" cy:directed="1"/>
      <edge id="79937" label="CHEK1 (GCN) WDR12" source="67282" target="66474" cy:directed="1"/>
      <edge id="79936" label="CHEK1 (GCN) MRPS33" source="67282" target="66624" cy:directed="1"/>
      <edge id="79935" label="CHEK1 (GCN) CDK5" source="67282" target="66572" cy:directed="1"/>
      <edge id="79934" label="CHEK1 (GCN) CNPY2" source="67282" target="67214" cy:directed="1"/>
      <edge id="79933" label="CHEK1 (GCN) SGOL2" source="67282" target="66988" cy:directed="1"/>
      <edge id="79932" label="CHEK1 (GCN) TARS2" source="67282" target="66842" cy:directed="1"/>
      <edge id="79931" label="CHEK1 (GCN) CSTF2" source="67282" target="66556" cy:directed="1"/>
      <edge id="79930" label="CHEK1 (GCN) NSF" source="67282" target="66989" cy:directed="1"/>
      <edge id="79929" label="CHEK1 (GCN) TRUB2" source="67282" target="66987" cy:directed="1"/>
      <edge id="79928" label="CHEK1 (GCN) MGME1" source="67282" target="67085" cy:directed="1"/>
      <edge id="79927" label="CHEK1 (GCN) SRD5A3" source="67282" target="66591" cy:directed="1"/>
      <edge id="79926" label="CHEK1 (GCN) DAP3" source="67282" target="66538" cy:directed="1"/>
      <edge id="79925" label="CHEK1 (GCN) DHFR" source="67282" target="67795" cy:directed="1"/>
      <edge id="79924" label="CHEK1 (GCN) SFXN4" source="67282" target="66528" cy:directed="1"/>
      <edge id="79923" label="CHEK1 (GCN) UQCC2" source="67282" target="66918" cy:directed="1"/>
      <edge id="79922" label="CHEK1 (GCN) PRDX4" source="67282" target="66491" cy:directed="1"/>
      <edge id="79921" label="CHEK1 (GCN) TMCO1" source="67282" target="67005" cy:directed="1"/>
      <edge id="79920" label="CHEK1 (GCN) MRPS16" source="67282" target="67239" cy:directed="1"/>
      <edge id="79919" label="CHEK1 (GCN) CPSF3" source="67282" target="66575" cy:directed="1"/>
      <edge id="79918" label="CHEK1 (GCN) GMPPA" source="67282" target="66510" cy:directed="1"/>
      <edge id="79917" label="CHEK1 (GCN) BRCC3" source="67282" target="67036" cy:directed="1"/>
      <edge id="79916" label="CHEK1 (GCN) MIS18A" source="67282" target="66480" cy:directed="1"/>
      <edge id="79915" label="CHEK1 (GCN) RNASEH2A" source="67282" target="66861" cy:directed="1"/>
      <edge id="79914" label="CHEK1 (GCN) C1orf85" source="67282" target="66579" cy:directed="1"/>
      <edge id="79913" label="CHEK1 (GCN) AIFM1" source="67282" target="66469" cy:directed="1"/>
      <edge id="79912" label="CHEK1 (GCN) SPC25" source="67282" target="66979" cy:directed="1"/>
      <edge id="79911" label="CHEK1 (GCN) KIAA0101" source="67282" target="66461" cy:directed="1"/>
      <edge id="79910" label="CHEK1 (GCN) FOXM1" source="67282" target="66970" cy:directed="1"/>
      <edge id="79909" label="CHEK1 (GCN) SAPCD2" source="67282" target="66447" cy:directed="1"/>
      <edge id="79908" label="GTSE1 (GCN) NUDT22" source="67281" target="67273" cy:directed="1"/>
      <edge id="79907" label="GTSE1 (GCN) MIS18A" source="67281" target="66480" cy:directed="1"/>
      <edge id="79906" label="GTSE1 (GCN) E2F1" source="67281" target="67443" cy:directed="1"/>
      <edge id="79905" label="GTSE1 (GCN) DTYMK" source="67281" target="66977" cy:directed="1"/>
      <edge id="79904" label="GTSE1 (GCN) OSTC" source="67281" target="66990" cy:directed="1"/>
      <edge id="79903" label="GTSE1 (GCN) SPDL1" source="67281" target="67227" cy:directed="1"/>
      <edge id="79902" label="GTSE1 (GCN) TARS2" source="67281" target="66842" cy:directed="1"/>
      <edge id="79901" label="GTSE1 (GCN) EPRS" source="67281" target="67285" cy:directed="1"/>
      <edge id="79900" label="GTSE1 (GCN) CSTF2" source="67281" target="66556" cy:directed="1"/>
      <edge id="79899" label="GTSE1 (GCN) UQCC2" source="67281" target="66918" cy:directed="1"/>
      <edge id="79898" label="GTSE1 (GCN) DECR2" source="67281" target="67062" cy:directed="1"/>
      <edge id="79897" label="GTSE1 (GCN) NIPSNAP1" source="67281" target="66986" cy:directed="1"/>
      <edge id="79896" label="GTSE1 (GCN) MRPS16" source="67281" target="67239" cy:directed="1"/>
      <edge id="79895" label="GTSE1 (GCN) CNP" source="67281" target="67080" cy:directed="1"/>
      <edge id="79894" label="GTSE1 (GCN) NSF" source="67281" target="66989" cy:directed="1"/>
      <edge id="79893" label="GTSE1 (GCN) PARP1" source="67281" target="66571" cy:directed="1"/>
      <edge id="79892" label="GTSE1 (GCN) MCTS1" source="67281" target="67288" cy:directed="1"/>
      <edge id="79891" label="GTSE1 (GCN) PRDX4" source="67281" target="66491" cy:directed="1"/>
      <edge id="79890" label="GTSE1 (GCN) CPSF3" source="67281" target="66575" cy:directed="1"/>
      <edge id="79889" label="GTSE1 (GCN) SLC35B2" source="67281" target="67287" cy:directed="1"/>
      <edge id="79888" label="GTSE1 (GCN) TMEM177" source="67281" target="66460" cy:directed="1"/>
      <edge id="79887" label="GTSE1 (GCN) C1orf85" source="67281" target="66579" cy:directed="1"/>
      <edge id="79886" label="GTSE1 (GCN) GMPPA" source="67281" target="66510" cy:directed="1"/>
      <edge id="79885" label="GTSE1 (GCN) SFXN4" source="67281" target="66528" cy:directed="1"/>
      <edge id="79884" label="GTSE1 (GCN) MYO7A" source="67281" target="66628" cy:directed="1"/>
      <edge id="79883" label="GTSE1 (GCN) DAP3" source="67281" target="66538" cy:directed="1"/>
      <edge id="79882" label="GTSE1 (GCN) DHFR" source="67281" target="67795" cy:directed="1"/>
      <edge id="79881" label="GTSE1 (GCN) BRCC3" source="67281" target="67036" cy:directed="1"/>
      <edge id="79880" label="GTSE1 (GCN) TXNDC17" source="67281" target="67097" cy:directed="1"/>
      <edge id="79879" label="GTSE1 (GCN) TONSL" source="67281" target="66484" cy:directed="1"/>
      <edge id="79878" label="GTSE1 (GCN) TIMELESS" source="67281" target="66451" cy:directed="1"/>
      <edge id="79877" label="GTSE1 (GCN) CDCA4" source="67281" target="67284" cy:directed="1"/>
      <edge id="79876" label="GTSE1 (GCN) TACC3" source="67281" target="66926" cy:directed="1"/>
      <edge id="79875" label="GTSE1 (GCN) CHEK1" source="67281" target="67282" cy:directed="1"/>
      <edge id="79874" label="GTSE1 (GCN) KIAA0101" source="67281" target="66461" cy:directed="1"/>
      <edge id="79873" label="GTSE1 (GCN) FOXM1" source="67281" target="66970" cy:directed="1"/>
      <edge id="79872" label="PITX2 (GRN) COMMD9" source="67280" target="66688" cy:directed="1"/>
      <edge id="79871" label="PITX2 (GRN) DNAJC28" source="67280" target="67614" cy:directed="1"/>
      <edge id="79870" label="PITX2 (GRN) SNX17" source="67280" target="66614" cy:directed="1"/>
      <edge id="79869" label="PITX2 (GRN) WDR6" source="67280" target="67609" cy:directed="1"/>
      <edge id="79868" label="PITX2 (GRN) RPS19BP1" source="67280" target="67649" cy:directed="1"/>
      <edge id="79867" label="PITX2 (GRN) TCTA" source="67280" target="66942" cy:directed="1"/>
      <edge id="79866" label="PITX2 (GRN) LSM4" source="67280" target="67903" cy:directed="1"/>
      <edge id="79865" label="PITX2 (GRN) BPNT1" source="67280" target="67327" cy:directed="1"/>
      <edge id="79864" label="PITX2 (GRN) C14orf119" source="67280" target="67787" cy:directed="1"/>
      <edge id="79863" label="PITX2 (GRN) KBTBD7" source="67280" target="67603" cy:directed="1"/>
      <edge id="79862" label="PITX2 (GRN) E2F1" source="67280" target="67443" cy:directed="1"/>
      <edge id="79861" label="PITX2 (GRN) SLC25A24" source="67280" target="67027" cy:directed="1"/>
      <edge id="79860" label="PITX2 (GRN) CTDSP1" source="67280" target="67902" cy:directed="1"/>
      <edge id="79859" label="PITX2 (GRN) C16orf95" source="67280" target="67279" cy:directed="1"/>
      <edge id="79858" label="PITX2 (GRN) AATK" source="67280" target="67145" cy:directed="1"/>
      <edge id="79857" label="PITX2 (GRN) ZNF135" source="67280" target="67782" cy:directed="1"/>
      <edge id="79856" label="PITX2 (GRN) THEM6" source="67280" target="66578" cy:directed="1"/>
      <edge id="79855" label="PITX2 (GRN) C1orf123" source="67280" target="67901" cy:directed="1"/>
      <edge id="79854" label="PITX2 (GRN) SLCO2B1" source="67280" target="67592" cy:directed="1"/>
      <edge id="79853" label="PITX2 (GRN) ARPC4" source="67280" target="67491" cy:directed="1"/>
      <edge id="79852" label="PITX2 (GRN) PCGF1" source="67280" target="67812" cy:directed="1"/>
      <edge id="79851" label="PITX2 (GRN) ZMAT5" source="67280" target="67588" cy:directed="1"/>
      <edge id="79850" label="PITX2 (GRN) RPL7L1" source="67280" target="67585" cy:directed="1"/>
      <edge id="79849" label="PITX2 (GRN) EMC7" source="67280" target="67780" cy:directed="1"/>
      <edge id="79848" label="PITX2 (GRN) PLGRKT" source="67280" target="67582" cy:directed="1"/>
      <edge id="79847" label="PITX2 (GRN) RTCA" source="67280" target="67767" cy:directed="1"/>
      <edge id="79846" label="PITX2 (GRN) ACBD6" source="67280" target="66792" cy:directed="1"/>
      <edge id="79845" label="PITX2 (GRN) ASAH2B" source="67280" target="66818" cy:directed="1"/>
      <edge id="79844" label="PITX2 (GRN) RAB42" source="67280" target="66777" cy:directed="1"/>
      <edge id="79843" label="PITX2 (GRN) RNASE6" source="67280" target="66488" cy:directed="1"/>
      <edge id="79842" label="PITX2 (GRN) ZBTB45" source="67280" target="67639" cy:directed="1"/>
      <edge id="79841" label="PITX2 (GRN) PRKAG1" source="67280" target="67577" cy:directed="1"/>
      <edge id="79840" label="PITX2 (GRN) UBLCP1" source="67280" target="67777" cy:directed="1"/>
      <edge id="79839" label="PITX2 (GRN) ZFYVE19" source="67280" target="66687" cy:directed="1"/>
      <edge id="79838" label="PITX2 (GRN) TMEM141" source="67280" target="66781" cy:directed="1"/>
      <edge id="79837" label="PITX2 (GRN) AAR2" source="67280" target="66472" cy:directed="1"/>
      <edge id="79836" label="PITX2 (GRN) TWF2" source="67280" target="67091" cy:directed="1"/>
      <edge id="79835" label="PITX2 (GRN) SUGP1" source="67280" target="67573" cy:directed="1"/>
      <edge id="79834" label="PITX2 (GRN) CHRNB1" source="67280" target="67568" cy:directed="1"/>
      <edge id="79833" label="PITX2 (GRN) CHAMP1" source="67280" target="67575" cy:directed="1"/>
      <edge id="79832" label="PITX2 (GRN) OST4" source="67280" target="67900" cy:directed="1"/>
      <edge id="79831" label="PITX2 (GRN) ACVRL1" source="67280" target="67848" cy:directed="1"/>
      <edge id="79830" label="PITX2 (GRN) DHTKD1" source="67280" target="67699" cy:directed="1"/>
      <edge id="79829" label="PITX2 (GRN) SHARPIN" source="67280" target="67564" cy:directed="1"/>
      <edge id="79828" label="PITX2 (GRN) MRPS22" source="67280" target="67775" cy:directed="1"/>
      <edge id="79827" label="PITX2 (GRN) PWWP2A" source="67280" target="67811" cy:directed="1"/>
      <edge id="79826" label="PITX2 (GRN) H2AFY" source="67280" target="67662" cy:directed="1"/>
      <edge id="79825" label="PITX2 (GRN) SDHC" source="67280" target="66950" cy:directed="1"/>
      <edge id="79824" label="PITX2 (GRN) LRRC14" source="67280" target="67899" cy:directed="1"/>
      <edge id="79823" label="PITX2 (GRN) ELAC1" source="67280" target="67769" cy:directed="1"/>
      <edge id="79822" label="PITX2 (GRN) IARS2" source="67280" target="67834" cy:directed="1"/>
      <edge id="79821" label="PITX2 (GRN) C19orf40" source="67280" target="67037" cy:directed="1"/>
      <edge id="79820" label="PITX2 (GRN) ZNF691" source="67280" target="67247" cy:directed="1"/>
      <edge id="79819" label="PITX2 (GRN) SIRT2" source="67280" target="67558" cy:directed="1"/>
      <edge id="79818" label="PITX2 (GRN) COA6" source="67280" target="66953" cy:directed="1"/>
      <edge id="79817" label="PITX2 (GRN) MRPL27" source="67280" target="66813" cy:directed="1"/>
      <edge id="79816" label="PITX2 (GRN) C6orf211" source="67280" target="67256" cy:directed="1"/>
      <edge id="79815" label="PITX2 (GRN) SNAP47" source="67280" target="67033" cy:directed="1"/>
      <edge id="79814" label="PITX2 (GRN) SND1" source="67280" target="67241" cy:directed="1"/>
      <edge id="79813" label="PITX2 (GRN) DECR2" source="67280" target="67062" cy:directed="1"/>
      <edge id="79812" label="PITX2 (GRN) MRPL44" source="67280" target="66707" cy:directed="1"/>
      <edge id="79811" label="PITX2 (GRN) PMVK" source="67280" target="67801" cy:directed="1"/>
      <edge id="79810" label="PITX2 (GRN) TADA3" source="67280" target="67557" cy:directed="1"/>
      <edge id="79809" label="PITX2 (GRN) MFNG" source="67280" target="67646" cy:directed="1"/>
      <edge id="79808" label="PITX2 (GRN) CDC123" source="67280" target="66811" cy:directed="1"/>
      <edge id="79807" label="PITX2 (GRN) ASNA1" source="67280" target="67550" cy:directed="1"/>
      <edge id="79806" label="PITX2 (GRN) FUNDC1" source="67280" target="66652" cy:directed="1"/>
      <edge id="79805" label="PITX2 (GRN) TSR3" source="67280" target="66815" cy:directed="1"/>
      <edge id="79804" label="PITX2 (GRN) ARCN1" source="67280" target="67489" cy:directed="1"/>
      <edge id="79803" label="PITX2 (GRN) SNRNP40" source="67280" target="67548" cy:directed="1"/>
      <edge id="79802" label="PITX2 (GRN) TREM2" source="67280" target="66713" cy:directed="1"/>
      <edge id="79801" label="PITX2 (GRN) PDZD11" source="67280" target="67803" cy:directed="1"/>
      <edge id="79800" label="PITX2 (GRN) LYRM2" source="67280" target="66457" cy:directed="1"/>
      <edge id="79799" label="PITX2 (GRN) SAYSD1" source="67280" target="67544" cy:directed="1"/>
      <edge id="79798" label="PITX2 (GRN) TRAPPC1" source="67280" target="66691" cy:directed="1"/>
      <edge id="79797" label="PITX2 (GRN) PHPT1" source="67280" target="67898" cy:directed="1"/>
      <edge id="79796" label="PITX2 (GRN) GTF2H3" source="67280" target="67542" cy:directed="1"/>
      <edge id="79795" label="PITX2 (GRN) CCS" source="67280" target="67897" cy:directed="1"/>
      <edge id="79794" label="PITX2 (GRN) URM1" source="67280" target="67176" cy:directed="1"/>
      <edge id="79793" label="PITX2 (GRN) PEPD" source="67280" target="67174" cy:directed="1"/>
      <edge id="79792" label="PITX2 (GRN) LZTR1" source="67280" target="67535" cy:directed="1"/>
      <edge id="79791" label="PITX2 (GRN) MS4A4A" source="67280" target="66789" cy:directed="1"/>
      <edge id="79790" label="PITX2 (GRN) ELP3" source="67280" target="67534" cy:directed="1"/>
      <edge id="79789" label="PITX2 (GRN) PGAM1" source="67280" target="67108" cy:directed="1"/>
      <edge id="79788" label="PITX2 (GRN) LCMT1" source="67280" target="66765" cy:directed="1"/>
      <edge id="79787" label="PITX2 (GRN) TIMM21" source="67280" target="67529" cy:directed="1"/>
      <edge id="79786" label="PITX2 (GRN) FBXW5" source="67280" target="67528" cy:directed="1"/>
      <edge id="79785" label="PITX2 (GRN) BLVRB" source="67280" target="67800" cy:directed="1"/>
      <edge id="79784" label="PITX2 (GRN) VWA9" source="67280" target="67761" cy:directed="1"/>
      <edge id="79783" label="PITX2 (GRN) PSMB7" source="67280" target="67815" cy:directed="1"/>
      <edge id="79782" label="PITX2 (GRN) RABIF" source="67280" target="67000" cy:directed="1"/>
      <edge id="79781" label="PITX2 (GRN) GLTPD1" source="67280" target="67525" cy:directed="1"/>
      <edge id="79780" label="PITX2 (GRN) NDUFV3" source="67280" target="67798" cy:directed="1"/>
      <edge id="79779" label="PITX2 (GRN) XKR8" source="67280" target="67523" cy:directed="1"/>
      <edge id="79778" label="PITX2 (GRN) MRPS33" source="67280" target="66624" cy:directed="1"/>
      <edge id="79777" label="PITX2 (GRN) TANGO2" source="67280" target="67110" cy:directed="1"/>
      <edge id="79776" label="PITX2 (GRN) SLC36A1" source="67280" target="67520" cy:directed="1"/>
      <edge id="79775" label="PITX2 (GRN) MUL1" source="67280" target="66531" cy:directed="1"/>
      <edge id="79774" label="PITX2 (GRN) FASTK" source="67280" target="67032" cy:directed="1"/>
      <edge id="79773" label="PITX2 (GRN) PSMC2" source="67280" target="66767" cy:directed="1"/>
      <edge id="79772" label="PITX2 (GRN) TARS2" source="67280" target="66842" cy:directed="1"/>
      <edge id="79771" label="PITX2 (GRN) PPP1CA" source="67280" target="66696" cy:directed="1"/>
      <edge id="79770" label="PITX2 (GRN) C9orf64" source="67280" target="67706" cy:directed="1"/>
      <edge id="79769" label="PITX2 (GRN) ATP6V0D1" source="67280" target="67896" cy:directed="1"/>
      <edge id="79768" label="PITX2 (GRN) DHFR" source="67280" target="67795" cy:directed="1"/>
      <edge id="79767" label="PITX2 (GRN) TOMM22" source="67280" target="67895" cy:directed="1"/>
      <edge id="79766" label="PITX2 (GRN) ZNF341" source="67280" target="67508" cy:directed="1"/>
      <edge id="79765" label="PITX2 (GRN) TMCO1" source="67280" target="67005" cy:directed="1"/>
      <edge id="79764" label="PITX2 (GRN) RHBDD3" source="67280" target="67619" cy:directed="1"/>
      <edge id="79763" label="PITX2 (GRN) TP53" source="67280" target="67270" cy:directed="1"/>
      <edge id="79762" label="PITX2 (GRN) NSDHL" source="67280" target="66908" cy:directed="1"/>
      <edge id="79761" label="PITX2 (GRN) SDCCAG3" source="67280" target="66812" cy:directed="1"/>
      <edge id="79760" label="PITX2 (GRN) VAC14" source="67280" target="67630" cy:directed="1"/>
      <edge id="79759" label="PITX2 (GRN) SMAD6" source="67280" target="67496" cy:directed="1"/>
      <edge id="79758" label="PITX2 (GRN) VPS33A" source="67280" target="66802" cy:directed="1"/>
      <edge id="79757" label="PITX2 (GRN) MRPS35" source="67280" target="66810" cy:directed="1"/>
      <edge id="79756" label="PITX2 (GRN) BRCC3" source="67280" target="67036" cy:directed="1"/>
      <edge id="79755" label="PITX2 (GRN) SLC39A3" source="67280" target="66780" cy:directed="1"/>
      <edge id="79754" label="PITX2 (GRN) SLC35A4" source="67280" target="66607" cy:directed="1"/>
      <edge id="79753" label="PITX2 (GRN) QDPR" source="67280" target="67488" cy:directed="1"/>
      <edge id="79752" label="PITX2 (GRN) CD180" source="67280" target="66833" cy:directed="1"/>
      <edge id="79751" label="PITX2 (GRN) PCCB" source="67280" target="66759" cy:directed="1"/>
      <edge id="79750" label="PITX2 (GRN) GPAA1" source="67280" target="66841" cy:directed="1"/>
      <edge id="79749" label="PITX2 (GRN) C1orf85" source="67280" target="66579" cy:directed="1"/>
      <edge id="79748" label="PITX2 (GRN) SCAMP3" source="67280" target="66778" cy:directed="1"/>
      <edge id="79747" label="PITX2 (GRN) CCDC71" source="67280" target="66502" cy:directed="1"/>
      <edge id="79746" label="PITX2 (GRN) UMPS" source="67280" target="66617" cy:directed="1"/>
      <edge id="79745" label="PITX2 (GRN) AIMP2" source="67280" target="66782" cy:directed="1"/>
      <edge id="79744" label="PITX2 (GRN) XRCC2" source="67280" target="67750" cy:directed="1"/>
      <edge id="79743" label="PITX2 (GRN) GNPDA1" source="67280" target="66639" cy:directed="1"/>
      <edge id="79742" label="PITX2 (GRN) ADSL" source="67280" target="66651" cy:directed="1"/>
      <edge id="79741" label="PITX2 (GRN) ARHGEF19" source="67280" target="66709" cy:directed="1"/>
      <edge id="79740" label="PITX2 (GRN) MTCH2" source="67280" target="66937" cy:directed="1"/>
      <edge id="79739" label="PITX2 (GRN) ALG5" source="67280" target="66899" cy:directed="1"/>
      <edge id="79738" label="PITX2 (GRN) SLC9A3R2" source="67280" target="67805" cy:directed="1"/>
      <edge id="79737" label="PITX2 (GRN) MRPS12" source="67280" target="66659" cy:directed="1"/>
      <edge id="79736" label="PITX2 (GRN) TRUB2" source="67280" target="66987" cy:directed="1"/>
      <edge id="79735" label="PITX2 (GRN) MRPS16" source="67280" target="67239" cy:directed="1"/>
      <edge id="79734" label="PITX2 (GRN) GMPPA" source="67280" target="66510" cy:directed="1"/>
      <edge id="79733" label="PITX2 (GRN) KIAA0101" source="67280" target="66461" cy:directed="1"/>
      <edge id="79732" label="PITX2 (GRN) COX8A" source="67280" target="67298" cy:directed="1"/>
      <edge id="79731" label="PITX2 (GRN) ZNF696" source="67280" target="66848" cy:directed="1"/>
      <edge id="79730" label="PITX2 (GRN) TP53I3" source="67280" target="66890" cy:directed="1"/>
      <edge id="79729" label="PITX2 (GRN) ZNF469" source="67280" target="66846" cy:directed="1"/>
      <edge id="79728" label="PITX2 (GRN) SLC25A11" source="67280" target="66540" cy:directed="1"/>
      <edge id="79727" label="PITX2 (GRN) GEMIN7" source="67280" target="66803" cy:directed="1"/>
      <edge id="79726" label="PITX2 (GRN) PIN1" source="67280" target="67069" cy:directed="1"/>
      <edge id="79725" label="PITX2 (GRN) POLR1B" source="67280" target="66840" cy:directed="1"/>
      <edge id="79724" label="PITX2 (GRN) ADCK1" source="67280" target="66838" cy:directed="1"/>
      <edge id="79723" label="PITX2 (GRN) NABP2" source="67280" target="67073" cy:directed="1"/>
      <edge id="79722" label="PITX2 (GRN) ZSWIM7" source="67280" target="66980" cy:directed="1"/>
      <edge id="79721" label="PITX2 (GRN) GTF3C6" source="67280" target="66775" cy:directed="1"/>
      <edge id="79720" label="PITX2 (GRN) FAM173B" source="67280" target="66832" cy:directed="1"/>
      <edge id="79719" label="PITX2 (GRN) C9orf69" source="67280" target="66744" cy:directed="1"/>
      <edge id="79718" label="PITX2 (GRN) PUSL1" source="67280" target="67018" cy:directed="1"/>
      <edge id="79717" label="PITX2 (GRN) COX6B1" source="67280" target="66669" cy:directed="1"/>
      <edge id="79716" label="PITX2 (GRN) ATP5G1" source="67280" target="67113" cy:directed="1"/>
      <edge id="79715" label="PITX2 (GRN) AP1B1" source="67280" target="66702" cy:directed="1"/>
      <edge id="79714" label="PITX2 (GRN) BRAT1" source="67280" target="66821" cy:directed="1"/>
      <edge id="79713" label="PITX2 (GRN) METTL6" source="67280" target="66960" cy:directed="1"/>
      <edge id="79712" label="PITX2 (GRN) TBCC" source="67280" target="66817" cy:directed="1"/>
      <edge id="79711" label="PITX2 (GRN) NUDT22" source="67280" target="67273" cy:directed="1"/>
      <edge id="79710" label="PITX2 (GRN) GPAM" source="67280" target="67052" cy:directed="1"/>
      <edge id="79709" label="PITX2 (GRN) SEC13" source="67280" target="66508" cy:directed="1"/>
      <edge id="79708" label="PITX2 (GRN) LYL1" source="67280" target="66612" cy:directed="1"/>
      <edge id="79707" label="PITX2 (GRN) NDUFS1" source="67280" target="66830" cy:directed="1"/>
      <edge id="79706" label="PITX2 (GRN) SSBP1" source="67280" target="66636" cy:directed="1"/>
      <edge id="79705" label="PITX2 (GRN) APOA1BP" source="67280" target="66674" cy:directed="1"/>
      <edge id="79704" label="PITX2 (GRN) SLC7A7" source="67280" target="66683" cy:directed="1"/>
      <edge id="79703" label="PITX2 (GRN) DCTN5" source="67280" target="67093" cy:directed="1"/>
      <edge id="79702" label="PITX2 (GRN) GCSH" source="67280" target="67092" cy:directed="1"/>
      <edge id="79701" label="PITX2 (GRN) B3GALT6" source="67280" target="67297" cy:directed="1"/>
      <edge id="79700" label="PITX2 (GRN) MPI" source="67280" target="66758" cy:directed="1"/>
      <edge id="79699" label="PITX2 (GRN) THAP8" source="67280" target="66795" cy:directed="1"/>
      <edge id="79698" label="PITX2 (GRN) UQCRC1" source="67280" target="66706" cy:directed="1"/>
      <edge id="79697" label="PITX2 (GRN) UNG" source="67280" target="67296" cy:directed="1"/>
      <edge id="79696" label="PITX2 (GRN) RMND5B" source="67280" target="67295" cy:directed="1"/>
      <edge id="79695" label="PITX2 (GRN) PTCD2" source="67280" target="66793" cy:directed="1"/>
      <edge id="79694" label="PITX2 (GRN) MRPL19" source="67280" target="66952" cy:directed="1"/>
      <edge id="79693" label="PITX2 (GRN) GPI" source="67280" target="67294" cy:directed="1"/>
      <edge id="79692" label="PITX2 (GRN) FAM118B" source="67280" target="66936" cy:directed="1"/>
      <edge id="79691" label="PITX2 (GRN) FARSA" source="67280" target="66704" cy:directed="1"/>
      <edge id="79690" label="PITX2 (GRN) EXO5" source="67280" target="66703" cy:directed="1"/>
      <edge id="79689" label="PITX2 (GRN) MRS2" source="67280" target="66879" cy:directed="1"/>
      <edge id="79688" label="PITX2 (GRN) DBI" source="67280" target="67088" cy:directed="1"/>
      <edge id="79687" label="PITX2 (GRN) DENR" source="67280" target="66666" cy:directed="1"/>
      <edge id="79686" label="PITX2 (GRN) MGME1" source="67280" target="67085" cy:directed="1"/>
      <edge id="79685" label="PITX2 (GRN) TMEM223" source="67280" target="66677" cy:directed="1"/>
      <edge id="79684" label="PITX2 (GRN) XYLB" source="67280" target="66742" cy:directed="1"/>
      <edge id="79683" label="PITX2 (GRN) MTIF2" source="67280" target="67293" cy:directed="1"/>
      <edge id="79682" label="PITX2 (GRN) SNUPN" source="67280" target="66768" cy:directed="1"/>
      <edge id="79681" label="PITX2 (GRN) PREB" source="67280" target="66711" cy:directed="1"/>
      <edge id="79680" label="PITX2 (GRN) CECR5" source="67280" target="67030" cy:directed="1"/>
      <edge id="79679" label="PITX2 (GRN) KLHL12" source="67280" target="66944" cy:directed="1"/>
      <edge id="79678" label="PITX2 (GRN) POLR3B" source="67280" target="66762" cy:directed="1"/>
      <edge id="79677" label="PITX2 (GRN) SLX4" source="67280" target="66943" cy:directed="1"/>
      <edge id="79676" label="PITX2 (GRN) SMUG1" source="67280" target="67021" cy:directed="1"/>
      <edge id="79675" label="PITX2 (GRN) NDUFS8" source="67280" target="67084" cy:directed="1"/>
      <edge id="79674" label="PITX2 (GRN) BLNK" source="67280" target="66754" cy:directed="1"/>
      <edge id="79673" label="PITX2 (GRN) CTNS" source="67280" target="66873" cy:directed="1"/>
      <edge id="79672" label="PITX2 (GRN) PCBD2" source="67280" target="66740" cy:directed="1"/>
      <edge id="79671" label="PITX2 (GRN) PARP1" source="67280" target="66571" cy:directed="1"/>
      <edge id="79670" label="PITX2 (GRN) LAMTOR1" source="67280" target="66982" cy:directed="1"/>
      <edge id="79669" label="PITX2 (GRN) FTSJ2" source="67280" target="66739" cy:directed="1"/>
      <edge id="79668" label="PITX2 (GRN) DCPS" source="67280" target="66998" cy:directed="1"/>
      <edge id="79667" label="PITX2 (GRN) EHMT2" source="67280" target="66876" cy:directed="1"/>
      <edge id="79666" label="PITX2 (GRN) FAM173A" source="67280" target="66610" cy:directed="1"/>
      <edge id="79665" label="PITX2 (GRN) ATP5F1" source="67280" target="66881" cy:directed="1"/>
      <edge id="79664" label="PITX2 (GRN) G6PC3" source="67280" target="67292" cy:directed="1"/>
      <edge id="79663" label="PITX2 (GRN) TIMM13" source="67280" target="66574" cy:directed="1"/>
      <edge id="79662" label="PITX2 (GRN) WBSCR16" source="67280" target="66717" cy:directed="1"/>
      <edge id="79661" label="PITX2 (GRN) TACC3" source="67280" target="66926" cy:directed="1"/>
      <edge id="79660" label="PITX2 (GRN) BLOC1S4" source="67280" target="66710" cy:directed="1"/>
      <edge id="79659" label="PITX2 (GRN) LACTB2" source="67280" target="66763" cy:directed="1"/>
      <edge id="79658" label="PITX2 (GRN) LEO1" source="67280" target="66708" cy:directed="1"/>
      <edge id="79657" label="PITX2 (GRN) NUDT16L1" source="67280" target="66997" cy:directed="1"/>
      <edge id="79656" label="PITX2 (GRN) PET112" source="67280" target="66697" cy:directed="1"/>
      <edge id="79655" label="PITX2 (GRN) IPO13" source="67280" target="66874" cy:directed="1"/>
      <edge id="79654" label="PITX2 (GRN) POP4" source="67280" target="67291" cy:directed="1"/>
      <edge id="79653" label="PITX2 (GRN) MFSD5" source="67280" target="66698" cy:directed="1"/>
      <edge id="79652" label="PITX2 (GRN) IRX2" source="67280" target="66694" cy:directed="1"/>
      <edge id="79651" label="PITX2 (GRN) SPHK2" source="67280" target="66693" cy:directed="1"/>
      <edge id="79650" label="PITX2 (GRN) TMEM147" source="67280" target="67015" cy:directed="1"/>
      <edge id="79649" label="PITX2 (GRN) SWSAP1" source="67280" target="67090" cy:directed="1"/>
      <edge id="79648" label="PITX2 (GRN) C1orf53" source="67280" target="66641" cy:directed="1"/>
      <edge id="79647" label="PITX2 (GRN) MYO7A" source="67280" target="66628" cy:directed="1"/>
      <edge id="79646" label="PITX2 (GRN) RP4-758J18.2" source="67280" target="67290" cy:directed="1"/>
      <edge id="79645" label="PITX2 (GRN) B4GALT7" source="67280" target="66929" cy:directed="1"/>
      <edge id="79644" label="PITX2 (GRN) ARMC6" source="67280" target="66686" cy:directed="1"/>
      <edge id="79643" label="PITX2 (GRN) COPZ1" source="67280" target="66525" cy:directed="1"/>
      <edge id="79642" label="PITX2 (GRN) MS4A7" source="67280" target="66681" cy:directed="1"/>
      <edge id="79641" label="PITX2 (GRN) RFT1" source="67280" target="67289" cy:directed="1"/>
      <edge id="79640" label="PITX2 (GRN) COPE" source="67280" target="66599" cy:directed="1"/>
      <edge id="79639" label="PITX2 (GRN) AP5S1" source="67280" target="66642" cy:directed="1"/>
      <edge id="79638" label="PITX2 (GRN) ITPA" source="67280" target="66672" cy:directed="1"/>
      <edge id="79637" label="PITX2 (GRN) CNPY2" source="67280" target="67214" cy:directed="1"/>
      <edge id="79636" label="PITX2 (GRN) SLC35B1" source="67280" target="66557" cy:directed="1"/>
      <edge id="79635" label="PITX2 (GRN) AARS2" source="67280" target="66670" cy:directed="1"/>
      <edge id="79634" label="PITX2 (GRN) MRPL15" source="67280" target="66626" cy:directed="1"/>
      <edge id="79633" label="PITX2 (GRN) MRPL35" source="67280" target="66927" cy:directed="1"/>
      <edge id="79632" label="PITX2 (GRN) CNIH4" source="67280" target="67107" cy:directed="1"/>
      <edge id="79631" label="PITX2 (GRN) C2" source="67280" target="66509" cy:directed="1"/>
      <edge id="79630" label="PITX2 (GRN) GPR34" source="67280" target="66520" cy:directed="1"/>
      <edge id="79629" label="PITX2 (GRN) NSUN5" source="67280" target="67087" cy:directed="1"/>
      <edge id="79628" label="PITX2 (GRN) TOR4A" source="67280" target="66705" cy:directed="1"/>
      <edge id="79627" label="PITX2 (GRN) FITM2" source="67280" target="66453" cy:directed="1"/>
      <edge id="79626" label="PITX2 (GRN) EGFL7" source="67280" target="66657" cy:directed="1"/>
      <edge id="79625" label="PITX2 (GRN) ECHS1" source="67280" target="66645" cy:directed="1"/>
      <edge id="79624" label="PITX2 (GRN) ABCB8" source="67280" target="66653" cy:directed="1"/>
      <edge id="79623" label="PITX2 (GRN) ACAT1" source="67280" target="66862" cy:directed="1"/>
      <edge id="79622" label="PITX2 (GRN) RENBP" source="67280" target="66555" cy:directed="1"/>
      <edge id="79621" label="PITX2 (GRN) CCDC167" source="67280" target="66633" cy:directed="1"/>
      <edge id="79620" label="PITX2 (GRN) MMACHC" source="67280" target="66647" cy:directed="1"/>
      <edge id="79619" label="PITX2 (GRN) FAM86A" source="67280" target="66613" cy:directed="1"/>
      <edge id="79618" label="PITX2 (GRN) BRI3BP" source="67280" target="66995" cy:directed="1"/>
      <edge id="79617" label="PITX2 (GRN) FAM195A" source="67280" target="67139" cy:directed="1"/>
      <edge id="79616" label="PITX2 (GRN) SPDL1" source="67280" target="67227" cy:directed="1"/>
      <edge id="79615" label="PITX2 (GRN) YIF1B" source="67280" target="67002" cy:directed="1"/>
      <edge id="79614" label="PITX2 (GRN) UROS" source="67280" target="66634" cy:directed="1"/>
      <edge id="79613" label="PITX2 (GRN) COPG1" source="67280" target="66547" cy:directed="1"/>
      <edge id="79612" label="PITX2 (GRN) ISOC2" source="67280" target="67082" cy:directed="1"/>
      <edge id="79611" label="PITX2 (GRN) MPV17" source="67280" target="66623" cy:directed="1"/>
      <edge id="79610" label="PITX2 (GRN) UQCC2" source="67280" target="66918" cy:directed="1"/>
      <edge id="79609" label="PITX2 (GRN) EXOSC5" source="67280" target="66864" cy:directed="1"/>
      <edge id="79608" label="PITX2 (GRN) LAMTOR2" source="67280" target="66863" cy:directed="1"/>
      <edge id="79607" label="PITX2 (GRN) PRDX4" source="67280" target="66491" cy:directed="1"/>
      <edge id="79606" label="PITX2 (GRN) GHITM" source="67280" target="67081" cy:directed="1"/>
      <edge id="79605" label="PITX2 (GRN) TXNDC17" source="67280" target="67097" cy:directed="1"/>
      <edge id="79604" label="PITX2 (GRN) SGOL2" source="67280" target="66988" cy:directed="1"/>
      <edge id="79603" label="PITX2 (GRN) LRRC20" source="67280" target="66915" cy:directed="1"/>
      <edge id="79602" label="PITX2 (GRN) CDK5" source="67280" target="66572" cy:directed="1"/>
      <edge id="79601" label="PITX2 (GRN) CYB561D2" source="67280" target="66462" cy:directed="1"/>
      <edge id="79600" label="PITX2 (GRN) TMEM79" source="67280" target="66609" cy:directed="1"/>
      <edge id="79599" label="PITX2 (GRN) FIGNL1" source="67280" target="66570" cy:directed="1"/>
      <edge id="79598" label="PITX2 (GRN) SFXN4" source="67280" target="66528" cy:directed="1"/>
      <edge id="79597" label="PITX2 (GRN) NDC1" source="67280" target="66605" cy:directed="1"/>
      <edge id="79596" label="PITX2 (GRN) NSF" source="67280" target="66989" cy:directed="1"/>
      <edge id="79595" label="PITX2 (GRN) CPSF3" source="67280" target="66575" cy:directed="1"/>
      <edge id="79594" label="PITX2 (GRN) GSTZ1" source="67280" target="66597" cy:directed="1"/>
      <edge id="79593" label="PITX2 (GRN) RNASEH2A" source="67280" target="66861" cy:directed="1"/>
      <edge id="79592" label="PITX2 (GRN) METTL13" source="67280" target="66593" cy:directed="1"/>
      <edge id="79591" label="PITX2 (GRN) RPUSD1" source="67280" target="66991" cy:directed="1"/>
      <edge id="79590" label="PITX2 (GRN) MCTS1" source="67280" target="67288" cy:directed="1"/>
      <edge id="79589" label="PITX2 (GRN) CTSA" source="67280" target="66592" cy:directed="1"/>
      <edge id="79588" label="PITX2 (GRN) EPDR1" source="67280" target="66466" cy:directed="1"/>
      <edge id="79587" label="PITX2 (GRN) SRD5A3" source="67280" target="66591" cy:directed="1"/>
      <edge id="79586" label="PITX2 (GRN) CLEC14A" source="67280" target="66588" cy:directed="1"/>
      <edge id="79585" label="PITX2 (GRN) ULK3" source="67280" target="66583" cy:directed="1"/>
      <edge id="79584" label="PITX2 (GRN) OSTC" source="67280" target="66990" cy:directed="1"/>
      <edge id="79583" label="PITX2 (GRN) SNF8" source="67280" target="66856" cy:directed="1"/>
      <edge id="79582" label="PITX2 (GRN) COQ9" source="67280" target="66576" cy:directed="1"/>
      <edge id="79581" label="PITX2 (GRN) C19orf24" source="67280" target="66909" cy:directed="1"/>
      <edge id="79580" label="PITX2 (GRN) CNP" source="67280" target="67080" cy:directed="1"/>
      <edge id="79579" label="PITX2 (GRN) PARK7" source="67280" target="66889" cy:directed="1"/>
      <edge id="79578" label="PITX2 (GRN) IDH1" source="67280" target="66772" cy:directed="1"/>
      <edge id="79577" label="PITX2 (GRN) MLST8" source="67280" target="66565" cy:directed="1"/>
      <edge id="79576" label="PITX2 (GRN) TMEM199" source="67280" target="66562" cy:directed="1"/>
      <edge id="79575" label="PITX2 (GRN) FIBP" source="67280" target="67077" cy:directed="1"/>
      <edge id="79574" label="PITX2 (GRN) CSTF2" source="67280" target="66556" cy:directed="1"/>
      <edge id="79573" label="PITX2 (GRN) SPC25" source="67280" target="66979" cy:directed="1"/>
      <edge id="79572" label="PITX2 (GRN) NIPSNAP1" source="67280" target="66986" cy:directed="1"/>
      <edge id="79571" label="PITX2 (GRN) PCNA" source="67280" target="66553" cy:directed="1"/>
      <edge id="79570" label="PITX2 (GRN) MRPL37" source="67280" target="66984" cy:directed="1"/>
      <edge id="79569" label="PITX2 (GRN) CD33" source="67280" target="66550" cy:directed="1"/>
      <edge id="79568" label="PITX2 (GRN) DFFA" source="67280" target="67235" cy:directed="1"/>
      <edge id="79567" label="PITX2 (GRN) CLN6" source="67280" target="66544" cy:directed="1"/>
      <edge id="79566" label="PITX2 (GRN) DAP3" source="67280" target="66538" cy:directed="1"/>
      <edge id="79565" label="PITX2 (GRN) SAC3D1" source="67280" target="66542" cy:directed="1"/>
      <edge id="79564" label="PITX2 (GRN) PSAT1" source="67280" target="66978" cy:directed="1"/>
      <edge id="79563" label="PITX2 (GRN) SLC35B2" source="67280" target="67287" cy:directed="1"/>
      <edge id="79562" label="PITX2 (GRN) DUOXA1" source="67280" target="67286" cy:directed="1"/>
      <edge id="79561" label="PITX2 (GRN) SLC27A4" source="67280" target="66905" cy:directed="1"/>
      <edge id="79560" label="PITX2 (GRN) SAPCD2" source="67280" target="66447" cy:directed="1"/>
      <edge id="79559" label="PITX2 (GRN) MON1A" source="67280" target="66458" cy:directed="1"/>
      <edge id="79558" label="PITX2 (GRN) EPRS" source="67280" target="67285" cy:directed="1"/>
      <edge id="79557" label="PITX2 (GRN) MRM1" source="67280" target="66521" cy:directed="1"/>
      <edge id="79556" label="PITX2 (GRN) FAM64A" source="67280" target="66516" cy:directed="1"/>
      <edge id="79555" label="PITX2 (GRN) CDCA4" source="67280" target="67284" cy:directed="1"/>
      <edge id="79554" label="PITX2 (GRN) YIF1A" source="67280" target="66500" cy:directed="1"/>
      <edge id="79553" label="PITX2 (GRN) S1PR4" source="67280" target="66499" cy:directed="1"/>
      <edge id="79552" label="PITX2 (GRN) FAM203A" source="67280" target="66494" cy:directed="1"/>
      <edge id="79551" label="PITX2 (GRN) MND1" source="67280" target="66493" cy:directed="1"/>
      <edge id="79550" label="PITX2 (GRN) OIP5" source="67280" target="66470" cy:directed="1"/>
      <edge id="79549" label="PITX2 (GRN) LIMS2" source="67280" target="66573" cy:directed="1"/>
      <edge id="79548" label="PITX2 (GRN) DTYMK" source="67280" target="66977" cy:directed="1"/>
      <edge id="79547" label="PITX2 (GRN) FPR3" source="67280" target="66489" cy:directed="1"/>
      <edge id="79546" label="PITX2 (GRN) NME6" source="67280" target="66486" cy:directed="1"/>
      <edge id="79545" label="PITX2 (GRN) TONSL" source="67280" target="66484" cy:directed="1"/>
      <edge id="79544" label="PITX2 (GRN) RILP" source="67280" target="66976" cy:directed="1"/>
      <edge id="79543" label="PITX2 (GRN) RAD51" source="67280" target="66972" cy:directed="1"/>
      <edge id="79542" label="PITX2 (GRN) MIS18A" source="67280" target="66480" cy:directed="1"/>
      <edge id="79541" label="PITX2 (GRN) HSPA12B" source="67280" target="67283" cy:directed="1"/>
      <edge id="79540" label="PITX2 (GRN) FOXM1" source="67280" target="66970" cy:directed="1"/>
      <edge id="79539" label="PITX2 (GRN) WDR12" source="67280" target="66474" cy:directed="1"/>
      <edge id="79538" label="PITX2 (GRN) AIFM1" source="67280" target="66469" cy:directed="1"/>
      <edge id="79537" label="PITX2 (GRN) TMEM177" source="67280" target="66460" cy:directed="1"/>
      <edge id="79536" label="PITX2 (GRN) SKA3" source="67280" target="66467" cy:directed="1"/>
      <edge id="79535" label="PITX2 (GRN) CCM2L" source="67280" target="66640" cy:directed="1"/>
      <edge id="79534" label="PITX2 (GRN) CHEK1" source="67280" target="67282" cy:directed="1"/>
      <edge id="79533" label="PITX2 (GRN) TIMELESS" source="67280" target="66451" cy:directed="1"/>
      <edge id="79532" label="PITX2 (GRN) PDHB" source="67280" target="66448" cy:directed="1"/>
      <edge id="79531" label="PITX2 (GRN) RHOBTB2" source="67280" target="67111" cy:directed="1"/>
      <edge id="79530" label="PITX2 (GRN) GTSE1" source="67280" target="67281" cy:directed="1"/>
      <edge id="79529" label="PITX2 (GRN) KIF4A" source="67280" target="67072" cy:directed="1"/>
      <edge id="79528" label="C16orf95 (GCN) CDC20" source="67279" target="67264" cy:directed="1"/>
      <edge id="79527" label="RAE1 (GCN) AURKA" source="67278" target="66969" cy:directed="1"/>
      <edge id="79526" label="ZKSCAN4 (GCN) CDC20" source="67277" target="67264" cy:directed="1"/>
      <edge id="79525" label="ZKSCAN4 (GCN) CCNB1" source="67277" target="66439" cy:directed="1"/>
      <edge id="79524" label="DUS2 (GCN) CDC20" source="67276" target="67264" cy:directed="1"/>
      <edge id="79523" label="CENPO (GCN) CDC20" source="67275" target="67264" cy:directed="1"/>
      <edge id="79522" label="CENPM (GCN) SPATA18" source="67274" target="67926" cy:directed="1"/>
      <edge id="79521" label="CENPM (GCN) SPAG8" source="67274" target="67356" cy:directed="1"/>
      <edge id="79520" label="CENPM (GCN) CDC20" source="67274" target="67264" cy:directed="1"/>
      <edge id="79519" label="NUDT22 (GCN) SAPCD2" source="67273" target="66447" cy:directed="1"/>
      <edge id="79518" label="NUDT22 (GCN) C16orf59" source="67273" target="66443" cy:directed="1"/>
      <edge id="79517" label="ZW10 (GCN) CCNB1" source="67272" target="66439" cy:directed="1"/>
      <edge id="79516" label="ZW10 (GCN) AURKA" source="67272" target="66969" cy:directed="1"/>
      <edge id="79515" label="PSMB2 (GCN) CDC20" source="67271" target="67264" cy:directed="1"/>
      <edge id="79514" label="TP53 (GCN) PYCR1" source="67270" target="66561" cy:directed="1"/>
      <edge id="79513" label="TIMM8B (GCN) PYCR1" source="67269" target="66561" cy:directed="1"/>
      <edge id="79512" label="PRMT3 (GCN) CDC20" source="67268" target="67264" cy:directed="1"/>
      <edge id="79511" label="PRMT3 (GCN) AURKA" source="67268" target="66969" cy:directed="1"/>
      <edge id="79510" label="PRMT3 (GCN) CCNB1" source="67268" target="66439" cy:directed="1"/>
      <edge id="79509" label="PDCD11 (GCN) MSTO1" source="67267" target="67265" cy:directed="1"/>
      <edge id="79508" label="RHNO1 (GCN) CCNB1" source="67266" target="66439" cy:directed="1"/>
      <edge id="79507" label="RHNO1 (GCN) AURKA" source="67266" target="66969" cy:directed="1"/>
      <edge id="79506" label="RHNO1 (GCN) CDC20" source="67266" target="67264" cy:directed="1"/>
      <edge id="79505" label="MSTO1 (GCN) SMYD5" source="67265" target="67156" cy:directed="1"/>
      <edge id="79504" label="MSTO1 (GCN) TBRG4" source="67265" target="66827" cy:directed="1"/>
      <edge id="79503" label="MSTO1 (GCN) CDC20" source="67265" target="67264" cy:directed="1"/>
      <edge id="79502" label="MSTO1 (GCN) NOP56" source="67265" target="67507" cy:directed="1"/>
      <edge id="79501" label="CDC20 (GCN) NUDT5" source="67264" target="66924" cy:directed="1"/>
      <edge id="79500" label="CDC20 (GCN) SMUG1" source="67264" target="67021" cy:directed="1"/>
      <edge id="79499" label="CDC20 (GCN) RPP40" source="67264" target="66644" cy:directed="1"/>
      <edge id="79498" label="CDC20 (GCN) TSFM" source="67264" target="66750" cy:directed="1"/>
      <edge id="79497" label="CDC20 (GCN) TXNDC5" source="67264" target="67871" cy:directed="1"/>
      <edge id="79496" label="CDC20 (GCN) SDSL" source="67264" target="67906" cy:directed="1"/>
      <edge id="79495" label="CDC20 (GCN) TRUB2" source="67264" target="66987" cy:directed="1"/>
      <edge id="79494" label="CDC20 (GCN) SLC25A10" source="67264" target="66446" cy:directed="1"/>
      <edge id="79493" label="CDC20 (GCN) ST14" source="67264" target="66791" cy:directed="1"/>
      <edge id="79492" label="CDC20 (GCN) HMBS" source="67264" target="67006" cy:directed="1"/>
      <edge id="79491" label="CDC20 (GCN) DOLPP1" source="67264" target="66492" cy:directed="1"/>
      <edge id="79490" label="CDC20 (GCN) IRAK1" source="67264" target="66618" cy:directed="1"/>
      <edge id="79489" label="CDC20 (GCN) MRPS16" source="67264" target="67239" cy:directed="1"/>
      <edge id="79488" label="CDC20 (GCN) MRPL44" source="67264" target="66707" cy:directed="1"/>
      <edge id="79487" label="CDC20 (GCN) KLHL12" source="67264" target="66944" cy:directed="1"/>
      <edge id="79486" label="CDC20 (GCN) PSMD14" source="67264" target="66963" cy:directed="1"/>
      <edge id="79485" label="CDC20 (GCN) FUNDC1" source="67264" target="66652" cy:directed="1"/>
      <edge id="79484" label="CDC20 (GCN) MRPS15" source="67264" target="67095" cy:directed="1"/>
      <edge id="79483" label="CDC20 (GCN) ACBD6" source="67264" target="66792" cy:directed="1"/>
      <edge id="79482" label="CDC20 (GCN) TLCD1" source="67264" target="67130" cy:directed="1"/>
      <edge id="79481" label="CDC20 (GCN) AIMP2" source="67264" target="66782" cy:directed="1"/>
      <edge id="79480" label="CDC20 (GCN) POLR3K" source="67264" target="66684" cy:directed="1"/>
      <edge id="79479" label="CDC20 (GCN) MRPS12" source="67264" target="66659" cy:directed="1"/>
      <edge id="79478" label="CDC20 (GCN) FADD" source="67264" target="66921" cy:directed="1"/>
      <edge id="79477" label="CDC20 (GCN) SDHC" source="67264" target="66950" cy:directed="1"/>
      <edge id="79476" label="CDC20 (GCN) FKBPL" source="67264" target="67892" cy:directed="1"/>
      <edge id="79475" label="CDC20 (GCN) MMACHC" source="67264" target="66647" cy:directed="1"/>
      <edge id="79474" label="CDC20 (GCN) MTCH2" source="67264" target="66937" cy:directed="1"/>
      <edge id="79473" label="CDC20 (GCN) FH" source="67264" target="66947" cy:directed="1"/>
      <edge id="79472" label="CDC20 (GCN) MCM3" source="67264" target="67891" cy:directed="1"/>
      <edge id="79471" label="CDC20 (GCN) GEMIN6" source="67264" target="67089" cy:directed="1"/>
      <edge id="79470" label="CDC20 (GCN) MRPS33" source="67264" target="66624" cy:directed="1"/>
      <edge id="79469" label="CDC20 (GCN) NUDT22" source="67264" target="67273" cy:directed="1"/>
      <edge id="79468" label="CDC20 (GCN) MTX1" source="67264" target="67889" cy:directed="1"/>
      <edge id="79467" label="CDC20 (GCN) MTX2" source="67264" target="66658" cy:directed="1"/>
      <edge id="79466" label="CDC20 (GCN) PSMG3" source="67264" target="66829" cy:directed="1"/>
      <edge id="79465" label="CDC20 (GCN) FOXRED1" source="67264" target="66667" cy:directed="1"/>
      <edge id="79464" label="CDC20 (GCN) UQCRQ" source="67264" target="67228" cy:directed="1"/>
      <edge id="79463" label="CDC20 (GCN) DHFR" source="67264" target="67795" cy:directed="1"/>
      <edge id="79462" label="CDC20 (GCN) C1orf85" source="67264" target="66579" cy:directed="1"/>
      <edge id="79461" label="CDC20 (GCN) MANEAL" source="67264" target="66507" cy:directed="1"/>
      <edge id="79460" label="CDC20 (GCN) UQCC2" source="67264" target="66918" cy:directed="1"/>
      <edge id="79459" label="CDC20 (GCN) CENPH" source="67264" target="66539" cy:directed="1"/>
      <edge id="79458" label="CDC20 (GCN) RMI2" source="67264" target="66975" cy:directed="1"/>
      <edge id="79457" label="TYMS (GCN) RMI2" source="67263" target="66975" cy:directed="1"/>
      <edge id="79456" label="TYMS (GCN) DHDDS" source="67263" target="66916" cy:directed="1"/>
      <edge id="79455" label="TYMS (GCN) C16orf59" source="67263" target="66443" cy:directed="1"/>
      <edge id="79454" label="TYMS (GCN) AURKA" source="67263" target="66969" cy:directed="1"/>
      <edge id="79453" label="TYMS (GCN) CCNB1" source="67263" target="66439" cy:directed="1"/>
      <edge id="79452" label="TYMS (GCN) CDC20" source="67263" target="67264" cy:directed="1"/>
      <edge id="79451" label="MYPOP (GRN) ACN9" source="67262" target="67615" cy:directed="1"/>
      <edge id="79450" label="MYPOP (GRN) SMG8" source="67262" target="67506" cy:directed="1"/>
      <edge id="79449" label="MYPOP (GRN) CDC123" source="67262" target="66811" cy:directed="1"/>
      <edge id="79448" label="MYPOP (GRN) TXNDC9" source="67262" target="67688" cy:directed="1"/>
      <edge id="79447" label="MYPOP (GRN) JAGN1" source="67262" target="66847" cy:directed="1"/>
      <edge id="79446" label="MYPOP (GRN) ZBTB8OS" source="67262" target="67638" cy:directed="1"/>
      <edge id="79445" label="MYPOP (GRN) TMEM254" source="67262" target="67883" cy:directed="1"/>
      <edge id="79444" label="MYPOP (GRN) LSM5" source="67262" target="67063" cy:directed="1"/>
      <edge id="79443" label="MYPOP (GRN) FAM175B" source="67262" target="67894" cy:directed="1"/>
      <edge id="79442" label="MYPOP (GRN) C11orf70" source="67262" target="67887" cy:directed="1"/>
      <edge id="79441" label="MYPOP (GRN) RPUSD4" source="67262" target="67596" cy:directed="1"/>
      <edge id="79440" label="MYPOP (GRN) FUNDC1" source="67262" target="66652" cy:directed="1"/>
      <edge id="79439" label="MYPOP (GRN) EPDR1" source="67262" target="66466" cy:directed="1"/>
      <edge id="79438" label="MYPOP (GRN) SUOX" source="67262" target="66537" cy:directed="1"/>
      <edge id="79437" label="MYPOP (GRN) SIGLEC10" source="67262" target="67511" cy:directed="1"/>
      <edge id="79436" label="MYPOP (GRN) MRPL47" source="67262" target="67821" cy:directed="1"/>
      <edge id="79435" label="MYPOP (GRN) NDUFV3" source="67262" target="67798" cy:directed="1"/>
      <edge id="79434" label="MYPOP (GRN) ACBD6" source="67262" target="66792" cy:directed="1"/>
      <edge id="79433" label="MYPOP (GRN) MRPS7" source="67262" target="67684" cy:directed="1"/>
      <edge id="79432" label="MYPOP (GRN) COA6" source="67262" target="66953" cy:directed="1"/>
      <edge id="79431" label="MYPOP (GRN) ABRACL" source="67262" target="66714" cy:directed="1"/>
      <edge id="79430" label="MYPOP (GRN) PTCD2" source="67262" target="66793" cy:directed="1"/>
      <edge id="79429" label="MYPOP (GRN) FTSJ2" source="67262" target="66739" cy:directed="1"/>
      <edge id="79428" label="MYPOP (GRN) AARS2" source="67262" target="66670" cy:directed="1"/>
      <edge id="79427" label="MYPOP (GRN) PCBD2" source="67262" target="66740" cy:directed="1"/>
      <edge id="79426" label="MYPOP (GRN) PSMC2" source="67262" target="66767" cy:directed="1"/>
      <edge id="79425" label="MYPOP (GRN) BEND3" source="67262" target="67858" cy:directed="1"/>
      <edge id="79424" label="MYPOP (GRN) CHAC2" source="67262" target="67618" cy:directed="1"/>
      <edge id="79423" label="MYPOP (GRN) PSMG1" source="67262" target="67522" cy:directed="1"/>
      <edge id="79422" label="MYPOP (GRN) VPS33A" source="67262" target="66802" cy:directed="1"/>
      <edge id="79421" label="MYPOP (GRN) PDSS2" source="67262" target="67893" cy:directed="1"/>
      <edge id="79420" label="MYPOP (GRN) TMEM192" source="67262" target="67518" cy:directed="1"/>
      <edge id="79419" label="MYPOP (GRN) SLX4" source="67262" target="66943" cy:directed="1"/>
      <edge id="79418" label="MYPOP (GRN) MRPL44" source="67262" target="66707" cy:directed="1"/>
      <edge id="79417" label="MYPOP (GRN) UBE2D4" source="67262" target="67768" cy:directed="1"/>
      <edge id="79416" label="MYPOP (GRN) SLC36A1" source="67262" target="67520" cy:directed="1"/>
      <edge id="79415" label="MYPOP (GRN) VPS25" source="67262" target="66945" cy:directed="1"/>
      <edge id="79414" label="MYPOP (GRN) CSTF1" source="67262" target="67802" cy:directed="1"/>
      <edge id="79413" label="MYPOP (GRN) GPT2" source="67262" target="67143" cy:directed="1"/>
      <edge id="79412" label="MYPOP (GRN) FKBPL" source="67262" target="67892" cy:directed="1"/>
      <edge id="79411" label="MYPOP (GRN) NDUFAF1" source="67262" target="67083" cy:directed="1"/>
      <edge id="79410" label="MYPOP (GRN) DRAM1" source="67262" target="66490" cy:directed="1"/>
      <edge id="79409" label="MYPOP (GRN) MCM3" source="67262" target="67891" cy:directed="1"/>
      <edge id="79408" label="MYPOP (GRN) SDHC" source="67262" target="66950" cy:directed="1"/>
      <edge id="79407" label="MYPOP (GRN) MMACHC" source="67262" target="66647" cy:directed="1"/>
      <edge id="79406" label="MYPOP (GRN) ATP6V1D" source="67262" target="67546" cy:directed="1"/>
      <edge id="79405" label="MYPOP (GRN) FADD" source="67262" target="66921" cy:directed="1"/>
      <edge id="79404" label="MYPOP (GRN) C6orf211" source="67262" target="67256" cy:directed="1"/>
      <edge id="79403" label="MYPOP (GRN) ERP29" source="67262" target="67538" cy:directed="1"/>
      <edge id="79402" label="MYPOP (GRN) CDK7" source="67262" target="67874" cy:directed="1"/>
      <edge id="79401" label="MYPOP (GRN) MRPS33" source="67262" target="66624" cy:directed="1"/>
      <edge id="79400" label="MYPOP (GRN) NDUFAB1" source="67262" target="67873" cy:directed="1"/>
      <edge id="79399" label="MYPOP (GRN) ANKEF1" source="67262" target="66498" cy:directed="1"/>
      <edge id="79398" label="MYPOP (GRN) NCBP2" source="67262" target="67890" cy:directed="1"/>
      <edge id="79397" label="MYPOP (GRN) AIMP2" source="67262" target="66782" cy:directed="1"/>
      <edge id="79396" label="MYPOP (GRN) SF3B5" source="67262" target="66630" cy:directed="1"/>
      <edge id="79395" label="MYPOP (GRN) POLR3K" source="67262" target="66684" cy:directed="1"/>
      <edge id="79394" label="MYPOP (GRN) MTX1" source="67262" target="67889" cy:directed="1"/>
      <edge id="79393" label="MYPOP (GRN) SAC3D1" source="67262" target="66542" cy:directed="1"/>
      <edge id="79392" label="MYPOP (GRN) EXO5" source="67262" target="66703" cy:directed="1"/>
      <edge id="79391" label="MYPOP (GRN) KLHL12" source="67262" target="66944" cy:directed="1"/>
      <edge id="79390" label="MYPOP (GRN) NDUFB2" source="67262" target="67758" cy:directed="1"/>
      <edge id="79389" label="MYPOP (GRN) MTX2" source="67262" target="66658" cy:directed="1"/>
      <edge id="79388" label="MYPOP (GRN) IPO13" source="67262" target="66874" cy:directed="1"/>
      <edge id="79387" label="MYPOP (GRN) FH" source="67262" target="66947" cy:directed="1"/>
      <edge id="79386" label="MYPOP (GRN) MTCH2" source="67262" target="66937" cy:directed="1"/>
      <edge id="79385" label="MYPOP (GRN) C3AR1" source="67262" target="66577" cy:directed="1"/>
      <edge id="79384" label="MYPOP (GRN) EIF3B" source="67262" target="67510" cy:directed="1"/>
      <edge id="79383" label="MYPOP (GRN) FOXRED1" source="67262" target="66667" cy:directed="1"/>
      <edge id="79382" label="MYPOP (GRN) MIPEP" source="67262" target="67417" cy:directed="1"/>
      <edge id="79381" label="MYPOP (GRN) THNSL1" source="67262" target="66601" cy:directed="1"/>
      <edge id="79380" label="MYPOP (GRN) EBNA1BP2" source="67262" target="67861" cy:directed="1"/>
      <edge id="79379" label="MYPOP (GRN) PSMD2" source="67262" target="67503" cy:directed="1"/>
      <edge id="79378" label="MYPOP (GRN) PSMB5" source="67262" target="67888" cy:directed="1"/>
      <edge id="79377" label="MYPOP (GRN) SLC30A6" source="67262" target="67166" cy:directed="1"/>
      <edge id="79376" label="MYPOP (GRN) MRPS23" source="67262" target="66738" cy:directed="1"/>
      <edge id="79375" label="MYPOP (GRN) CDKL2" source="67262" target="67482" cy:directed="1"/>
      <edge id="79374" label="MYPOP (GRN) POLR2C" source="67262" target="66527" cy:directed="1"/>
      <edge id="79373" label="MYPOP (GRN) PARN" source="67262" target="67495" cy:directed="1"/>
      <edge id="79372" label="MYPOP (GRN) MANEAL" source="67262" target="66507" cy:directed="1"/>
      <edge id="79371" label="MYPOP (GRN) C1orf85" source="67262" target="66579" cy:directed="1"/>
      <edge id="79370" label="MYPOP (GRN) NOP56" source="67262" target="67507" cy:directed="1"/>
      <edge id="79369" label="MYPOP (GRN) DHFR" source="67262" target="67795" cy:directed="1"/>
      <edge id="79368" label="MYPOP (GRN) L2HGDH" source="67262" target="66746" cy:directed="1"/>
      <edge id="79367" label="MYPOP (GRN) KARS" source="67262" target="67486" cy:directed="1"/>
      <edge id="79366" label="MYPOP (GRN) PSMG3" source="67262" target="66829" cy:directed="1"/>
      <edge id="79365" label="MYPOP (GRN) MUL1" source="67262" target="66531" cy:directed="1"/>
      <edge id="79364" label="MYPOP (GRN) RMI2" source="67262" target="66975" cy:directed="1"/>
      <edge id="79363" label="MYPOP (GRN) RAN" source="67262" target="66712" cy:directed="1"/>
      <edge id="79362" label="MYPOP (GRN) ZNF385B" source="67262" target="67742" cy:directed="1"/>
      <edge id="79361" label="MYPOP (GRN) TBRG4" source="67262" target="66827" cy:directed="1"/>
      <edge id="79360" label="MYPOP (GRN) NIF3L1" source="67262" target="66806" cy:directed="1"/>
      <edge id="79359" label="MYPOP (GRN) METTL6" source="67262" target="66960" cy:directed="1"/>
      <edge id="79358" label="MYPOP (GRN) C16orf95" source="67262" target="67279" cy:directed="1"/>
      <edge id="79357" label="MYPOP (GRN) MRPS12" source="67262" target="66659" cy:directed="1"/>
      <edge id="79356" label="MYPOP (GRN) AURKAIP1" source="67262" target="66951" cy:directed="1"/>
      <edge id="79355" label="MYPOP (GRN) BTF3L4" source="67262" target="67040" cy:directed="1"/>
      <edge id="79354" label="MYPOP (GRN) ELMO3" source="67262" target="67028" cy:directed="1"/>
      <edge id="79353" label="MYPOP (GRN) UQCRQ" source="67262" target="67228" cy:directed="1"/>
      <edge id="79352" label="MYPOP (GRN) MRPL4" source="67262" target="66731" cy:directed="1"/>
      <edge id="79351" label="MYPOP (GRN) RAE1" source="67262" target="67278" cy:directed="1"/>
      <edge id="79350" label="MYPOP (GRN) ZKSCAN4" source="67262" target="67277" cy:directed="1"/>
      <edge id="79349" label="MYPOP (GRN) ATPAF1" source="67262" target="66771" cy:directed="1"/>
      <edge id="79348" label="MYPOP (GRN) FITM2" source="67262" target="66453" cy:directed="1"/>
      <edge id="79347" label="MYPOP (GRN) DUS2" source="67262" target="67276" cy:directed="1"/>
      <edge id="79346" label="MYPOP (GRN) DCTN5" source="67262" target="67093" cy:directed="1"/>
      <edge id="79345" label="MYPOP (GRN) ALOX15B" source="67262" target="67198" cy:directed="1"/>
      <edge id="79344" label="MYPOP (GRN) SPRYD4" source="67262" target="66676" cy:directed="1"/>
      <edge id="79343" label="MYPOP (GRN) C16orf70" source="67262" target="66928" cy:directed="1"/>
      <edge id="79342" label="MYPOP (GRN) TAF6L" source="67262" target="66801" cy:directed="1"/>
      <edge id="79341" label="MYPOP (GRN) TACO1" source="67262" target="66790" cy:directed="1"/>
      <edge id="79340" label="MYPOP (GRN) SWSAP1" source="67262" target="67090" cy:directed="1"/>
      <edge id="79339" label="MYPOP (GRN) CENPO" source="67262" target="67275" cy:directed="1"/>
      <edge id="79338" label="MYPOP (GRN) SLC7A7" source="67262" target="66683" cy:directed="1"/>
      <edge id="79337" label="MYPOP (GRN) GEMIN6" source="67262" target="67089" cy:directed="1"/>
      <edge id="79336" label="MYPOP (GRN) SDCCAG3" source="67262" target="66812" cy:directed="1"/>
      <edge id="79335" label="MYPOP (GRN) HARBI1" source="67262" target="67051" cy:directed="1"/>
      <edge id="79334" label="MYPOP (GRN) MRPS35" source="67262" target="66810" cy:directed="1"/>
      <edge id="79333" label="MYPOP (GRN) NCLN" source="67262" target="66809" cy:directed="1"/>
      <edge id="79332" label="MYPOP (GRN) GBA" source="67262" target="66580" cy:directed="1"/>
      <edge id="79331" label="MYPOP (GRN) CENPM" source="67262" target="67274" cy:directed="1"/>
      <edge id="79330" label="MYPOP (GRN) GLYCTK" source="67262" target="66954" cy:directed="1"/>
      <edge id="79329" label="MYPOP (GRN) NUDT22" source="67262" target="67273" cy:directed="1"/>
      <edge id="79328" label="MYPOP (GRN) C19orf40" source="67262" target="67037" cy:directed="1"/>
      <edge id="79327" label="MYPOP (GRN) PRDX3" source="67262" target="67251" cy:directed="1"/>
      <edge id="79326" label="MYPOP (GRN) MRPL27" source="67262" target="66813" cy:directed="1"/>
      <edge id="79325" label="MYPOP (GRN) ZW10" source="67262" target="67272" cy:directed="1"/>
      <edge id="79324" label="MYPOP (GRN) PSMB2" source="67262" target="67271" cy:directed="1"/>
      <edge id="79323" label="MYPOP (GRN) CISD2" source="67262" target="66757" cy:directed="1"/>
      <edge id="79322" label="MYPOP (GRN) SLC25A20" source="67262" target="66949" cy:directed="1"/>
      <edge id="79321" label="MYPOP (GRN) WDR89" source="67262" target="67114" cy:directed="1"/>
      <edge id="79320" label="MYPOP (GRN) DIEXF" source="67262" target="66584" cy:directed="1"/>
      <edge id="79319" label="MYPOP (GRN) SLC27A4" source="67262" target="66905" cy:directed="1"/>
      <edge id="79318" label="MYPOP (GRN) POLR3B" source="67262" target="66762" cy:directed="1"/>
      <edge id="79317" label="MYPOP (GRN) GTF3C6" source="67262" target="66775" cy:directed="1"/>
      <edge id="79316" label="MYPOP (GRN) PSMD14" source="67262" target="66963" cy:directed="1"/>
      <edge id="79315" label="MYPOP (GRN) SNRPC" source="67262" target="66685" cy:directed="1"/>
      <edge id="79314" label="MYPOP (GRN) ARMC6" source="67262" target="66686" cy:directed="1"/>
      <edge id="79313" label="MYPOP (GRN) CYC1" source="67262" target="67216" cy:directed="1"/>
      <edge id="79312" label="MYPOP (GRN) FAM86C1" source="67262" target="66631" cy:directed="1"/>
      <edge id="79311" label="MYPOP (GRN) EEF1E1" source="67262" target="67220" cy:directed="1"/>
      <edge id="79310" label="MYPOP (GRN) LACTB2" source="67262" target="66763" cy:directed="1"/>
      <edge id="79309" label="MYPOP (GRN) ASAH2B" source="67262" target="66818" cy:directed="1"/>
      <edge id="79308" label="MYPOP (GRN) MPI" source="67262" target="66758" cy:directed="1"/>
      <edge id="79307" label="MYPOP (GRN) DPM2" source="67262" target="67140" cy:directed="1"/>
      <edge id="79306" label="MYPOP (GRN) DLAT" source="67262" target="66751" cy:directed="1"/>
      <edge id="79305" label="MYPOP (GRN) XYLB" source="67262" target="66742" cy:directed="1"/>
      <edge id="79304" label="MYPOP (GRN) EXOSC1" source="67262" target="66888" cy:directed="1"/>
      <edge id="79303" label="MYPOP (GRN) ATP5F1" source="67262" target="66881" cy:directed="1"/>
      <edge id="79302" label="MYPOP (GRN) TP53" source="67262" target="67270" cy:directed="1"/>
      <edge id="79301" label="MYPOP (GRN) TIMM8B" source="67262" target="67269" cy:directed="1"/>
      <edge id="79300" label="MYPOP (GRN) MRPL13" source="67262" target="66914" cy:directed="1"/>
      <edge id="79299" label="MYPOP (GRN) CNIH4" source="67262" target="67107" cy:directed="1"/>
      <edge id="79298" label="MYPOP (GRN) C19orf24" source="67262" target="66909" cy:directed="1"/>
      <edge id="79297" label="MYPOP (GRN) PES1" source="67262" target="66730" cy:directed="1"/>
      <edge id="79296" label="MYPOP (GRN) DFFA" source="67262" target="67235" cy:directed="1"/>
      <edge id="79295" label="MYPOP (GRN) ST3GAL5" source="67262" target="66720" cy:directed="1"/>
      <edge id="79294" label="MYPOP (GRN) ARPC1B" source="67262" target="66716" cy:directed="1"/>
      <edge id="79293" label="MYPOP (GRN) PRMT3" source="67262" target="67268" cy:directed="1"/>
      <edge id="79292" label="MYPOP (GRN) PYCR1" source="67262" target="66561" cy:directed="1"/>
      <edge id="79291" label="MYPOP (GRN) MECR" source="67262" target="66728" cy:directed="1"/>
      <edge id="79290" label="MYPOP (GRN) SSR1" source="67262" target="66699" cy:directed="1"/>
      <edge id="79289" label="MYPOP (GRN) SSBP1" source="67262" target="66636" cy:directed="1"/>
      <edge id="79288" label="MYPOP (GRN) RPL26L1" source="67262" target="67104" cy:directed="1"/>
      <edge id="79287" label="MYPOP (GRN) PARS2" source="67262" target="66682" cy:directed="1"/>
      <edge id="79286" label="MYPOP (GRN) ICT1" source="67262" target="66675" cy:directed="1"/>
      <edge id="79285" label="MYPOP (GRN) COX6B1" source="67262" target="66669" cy:directed="1"/>
      <edge id="79284" label="MYPOP (GRN) ISCA2" source="67262" target="66721" cy:directed="1"/>
      <edge id="79283" label="MYPOP (GRN) FIBP" source="67262" target="67077" cy:directed="1"/>
      <edge id="79282" label="MYPOP (GRN) CENPH" source="67262" target="66539" cy:directed="1"/>
      <edge id="79281" label="MYPOP (GRN) PDCD11" source="67262" target="67267" cy:directed="1"/>
      <edge id="79280" label="MYPOP (GRN) TMCO1" source="67262" target="67005" cy:directed="1"/>
      <edge id="79279" label="MYPOP (GRN) GNPDA1" source="67262" target="66639" cy:directed="1"/>
      <edge id="79278" label="MYPOP (GRN) DHDDS" source="67262" target="66916" cy:directed="1"/>
      <edge id="79277" label="MYPOP (GRN) RABIF" source="67262" target="67000" cy:directed="1"/>
      <edge id="79276" label="MYPOP (GRN) HYLS1" source="67262" target="66582" cy:directed="1"/>
      <edge id="79275" label="MYPOP (GRN) MRPL15" source="67262" target="66626" cy:directed="1"/>
      <edge id="79274" label="MYPOP (GRN) VSIG4" source="67262" target="66445" cy:directed="1"/>
      <edge id="79273" label="MYPOP (GRN) TRIP13" source="67262" target="66606" cy:directed="1"/>
      <edge id="79272" label="MYPOP (GRN) PARK7" source="67262" target="66889" cy:directed="1"/>
      <edge id="79271" label="MYPOP (GRN) UQCC2" source="67262" target="66918" cy:directed="1"/>
      <edge id="79270" label="MYPOP (GRN) MLST8" source="67262" target="66565" cy:directed="1"/>
      <edge id="79269" label="MYPOP (GRN) C19orf48" source="67262" target="66569" cy:directed="1"/>
      <edge id="79268" label="MYPOP (GRN) CSTF2" source="67262" target="66556" cy:directed="1"/>
      <edge id="79267" label="MYPOP (GRN) NAT10" source="67262" target="66602" cy:directed="1"/>
      <edge id="79266" label="MYPOP (GRN) NIPSNAP1" source="67262" target="66986" cy:directed="1"/>
      <edge id="79265" label="MYPOP (GRN) MACROD2" source="67262" target="66598" cy:directed="1"/>
      <edge id="79264" label="MYPOP (GRN) SLC38A7" source="67262" target="66487" cy:directed="1"/>
      <edge id="79263" label="MYPOP (GRN) SYS1" source="67262" target="66590" cy:directed="1"/>
      <edge id="79262" label="MYPOP (GRN) SLC39A8" source="67262" target="66503" cy:directed="1"/>
      <edge id="79261" label="MYPOP (GRN) ATP5H" source="67262" target="66956" cy:directed="1"/>
      <edge id="79260" label="MYPOP (GRN) MED8" source="67262" target="67103" cy:directed="1"/>
      <edge id="79259" label="MYPOP (GRN) LAMTOR2" source="67262" target="66863" cy:directed="1"/>
      <edge id="79258" label="MYPOP (GRN) NECAB1" source="67262" target="66581" cy:directed="1"/>
      <edge id="79257" label="MYPOP (GRN) CLN6" source="67262" target="66544" cy:directed="1"/>
      <edge id="79256" label="MYPOP (GRN) RHNO1" source="67262" target="67266" cy:directed="1"/>
      <edge id="79255" label="MYPOP (GRN) C16orf59" source="67262" target="66443" cy:directed="1"/>
      <edge id="79254" label="MYPOP (GRN) CDK5" source="67262" target="66572" cy:directed="1"/>
      <edge id="79253" label="MYPOP (GRN) SNX25" source="67262" target="66437" cy:directed="1"/>
      <edge id="79252" label="MYPOP (GRN) CPSF3" source="67262" target="66575" cy:directed="1"/>
      <edge id="79251" label="MYPOP (GRN) RER1" source="67262" target="66558" cy:directed="1"/>
      <edge id="79250" label="MYPOP (GRN) DPP3" source="67262" target="66523" cy:directed="1"/>
      <edge id="79249" label="MYPOP (GRN) MSTO1" source="67262" target="67265" cy:directed="1"/>
      <edge id="79248" label="MYPOP (GRN) ERAL1" source="67262" target="66549" cy:directed="1"/>
      <edge id="79247" label="MYPOP (GRN) MRPL3" source="67262" target="66465" cy:directed="1"/>
      <edge id="79246" label="MYPOP (GRN) C1QBP" source="67262" target="66534" cy:directed="1"/>
      <edge id="79245" label="MYPOP (GRN) TLCD1" source="67262" target="67130" cy:directed="1"/>
      <edge id="79244" label="MYPOP (GRN) SNF8" source="67262" target="66856" cy:directed="1"/>
      <edge id="79243" label="MYPOP (GRN) MRPS15" source="67262" target="67095" cy:directed="1"/>
      <edge id="79242" label="MYPOP (GRN) GSTA4" source="67262" target="66512" cy:directed="1"/>
      <edge id="79241" label="MYPOP (GRN) TRAIP" source="67262" target="66505" cy:directed="1"/>
      <edge id="79240" label="MYPOP (GRN) PRDX4" source="67262" target="66491" cy:directed="1"/>
      <edge id="79239" label="MYPOP (GRN) FPR3" source="67262" target="66489" cy:directed="1"/>
      <edge id="79238" label="MYPOP (GRN) ATP5G1" source="67262" target="67113" cy:directed="1"/>
      <edge id="79237" label="MYPOP (GRN) MEF2BNB" source="67262" target="66481" cy:directed="1"/>
      <edge id="79236" label="MYPOP (GRN) MIS18A" source="67262" target="66480" cy:directed="1"/>
      <edge id="79235" label="MYPOP (GRN) FLAD1" source="67262" target="66473" cy:directed="1"/>
      <edge id="79234" label="MYPOP (GRN) CDC20" source="67262" target="67264" cy:directed="1"/>
      <edge id="79233" label="MYPOP (GRN) MCM2" source="67262" target="66444" cy:directed="1"/>
      <edge id="79232" label="MYPOP (GRN) PTPN13" source="67262" target="66463" cy:directed="1"/>
      <edge id="79231" label="MYPOP (GRN) ALG1" source="67262" target="66441" cy:directed="1"/>
      <edge id="79230" label="MYPOP (GRN) LRRK2" source="67262" target="66454" cy:directed="1"/>
      <edge id="79229" label="MYPOP (GRN) LYRM2" source="67262" target="66457" cy:directed="1"/>
      <edge id="79228" label="MYPOP (GRN) ECE2" source="67262" target="66851" cy:directed="1"/>
      <edge id="79227" label="MYPOP (GRN) AURKA" source="67262" target="66969" cy:directed="1"/>
      <edge id="79226" label="MYPOP (GRN) TYMS" source="67262" target="67263" cy:directed="1"/>
      <edge id="79225" label="MYPOP (GRN) CCT5" source="67262" target="66957" cy:directed="1"/>
      <edge id="79224" label="MYPOP (GRN) CCT3" source="67262" target="66440" cy:directed="1"/>
      <edge id="79223" label="MYPOP (GRN) SLC22A3" source="67262" target="66967" cy:directed="1"/>
      <edge id="79222" label="MYPOP (GRN) CCNB1" source="67262" target="66439" cy:directed="1"/>
      <edge id="79221" label="ELF5 (GRN) SMAD6" source="67261" target="67496" cy:directed="1"/>
      <edge id="79220" label="ELF5 (GRN) MEF2BNB" source="67261" target="66481" cy:directed="1"/>
      <edge id="79219" label="ELF5 (GRN) NUBP1" source="67261" target="66496" cy:directed="1"/>
      <edge id="79218" label="ELF5 (GRN) L3MBTL2" source="67261" target="67730" cy:directed="1"/>
      <edge id="79217" label="ELF5 (GRN) DBNL" source="67261" target="67583" cy:directed="1"/>
      <edge id="79216" label="ELF5 (GRN) FOXRED1" source="67261" target="66667" cy:directed="1"/>
      <edge id="79215" label="ELF5 (GRN) ARMC9" source="67261" target="67490" cy:directed="1"/>
      <edge id="79214" label="ELF5 (GRN) QDPR" source="67261" target="67488" cy:directed="1"/>
      <edge id="79213" label="ELF5 (GRN) GPT2" source="67261" target="67143" cy:directed="1"/>
      <edge id="79212" label="ELF5 (GRN) C19orf59" source="67261" target="66732" cy:directed="1"/>
      <edge id="79211" label="ELF5 (GRN) PDCD11" source="67261" target="67267" cy:directed="1"/>
      <edge id="79210" label="ELF5 (GRN) NOP56" source="67261" target="67507" cy:directed="1"/>
      <edge id="79209" label="ELF5 (GRN) ARPC1B" source="67261" target="66716" cy:directed="1"/>
      <edge id="79208" label="ELF5 (GRN) IPO13" source="67261" target="66874" cy:directed="1"/>
      <edge id="79207" label="ELF5 (GRN) EIF3B" source="67261" target="67510" cy:directed="1"/>
      <edge id="79206" label="ELF5 (GRN) FAM86A" source="67261" target="66613" cy:directed="1"/>
      <edge id="79205" label="ELF5 (GRN) CDKL2" source="67261" target="67482" cy:directed="1"/>
      <edge id="79204" label="ELF5 (GRN) MON1A" source="67261" target="66458" cy:directed="1"/>
      <edge id="79203" label="ELF5 (GRN) ZNF696" source="67261" target="66848" cy:directed="1"/>
      <edge id="79202" label="ELF5 (GRN) DUOX1" source="67261" target="66690" cy:directed="1"/>
      <edge id="79201" label="ELF5 (GRN) SCAMP4" source="67261" target="66518" cy:directed="1"/>
      <edge id="79200" label="ELF5 (GRN) NFS1" source="67261" target="66760" cy:directed="1"/>
      <edge id="79199" label="ELF5 (GRN) RENBP" source="67261" target="66555" cy:directed="1"/>
      <edge id="79198" label="ELF5 (GRN) SYK" source="67261" target="66679" cy:directed="1"/>
      <edge id="79197" label="ELF5 (GRN) NECAB1" source="67261" target="66581" cy:directed="1"/>
      <edge id="79196" label="ELF5 (GRN) FLAD1" source="67261" target="66473" cy:directed="1"/>
      <edge id="79195" label="ELF5 (GRN) SLC38A7" source="67261" target="66487" cy:directed="1"/>
      <edge id="79194" label="ZBED3 (GCN) LRRK2" source="67260" target="66454" cy:directed="1"/>
      <edge id="79193" label="SSR3 (GCN) PDIA4" source="67259" target="66893" cy:directed="1"/>
      <edge id="79192" label="ARNTL (GRN) KARS" source="67258" target="67486" cy:directed="1"/>
      <edge id="79191" label="ARNTL (GRN) ACOT1" source="67258" target="66931" cy:directed="1"/>
      <edge id="79190" label="ARNTL (GRN) C11orf70" source="67258" target="67887" cy:directed="1"/>
      <edge id="79189" label="ARNTL (GRN) SIGLEC10" source="67258" target="67511" cy:directed="1"/>
      <edge id="79188" label="ARNTL (GRN) SERPINF2" source="67258" target="67177" cy:directed="1"/>
      <edge id="79187" label="ARNTL (GRN) RNASEH2A" source="67258" target="66861" cy:directed="1"/>
      <edge id="79186" label="ARNTL (GRN) BEND3" source="67258" target="67858" cy:directed="1"/>
      <edge id="79185" label="ARNTL (GRN) IRAK1" source="67258" target="66618" cy:directed="1"/>
      <edge id="79184" label="ARNTL (GRN) CA12" source="67258" target="67516" cy:directed="1"/>
      <edge id="79183" label="ARNTL (GRN) DRAM1" source="67258" target="66490" cy:directed="1"/>
      <edge id="79182" label="ARNTL (GRN) RPN2" source="67258" target="67244" cy:directed="1"/>
      <edge id="79181" label="ARNTL (GRN) ORC5" source="67258" target="67707" cy:directed="1"/>
      <edge id="79180" label="ARNTL (GRN) RPA3" source="67258" target="66962" cy:directed="1"/>
      <edge id="79179" label="ARNTL (GRN) AP1S1" source="67258" target="66533" cy:directed="1"/>
      <edge id="79178" label="ARNTL (GRN) CPSF3" source="67258" target="66575" cy:directed="1"/>
      <edge id="79177" label="ARNTL (GRN) MBIP" source="67258" target="67196" cy:directed="1"/>
      <edge id="79176" label="ARNTL (GRN) RABIF" source="67258" target="67000" cy:directed="1"/>
      <edge id="79175" label="ARNTL (GRN) TSFM" source="67258" target="66750" cy:directed="1"/>
      <edge id="79174" label="ARNTL (GRN) PUS1" source="67258" target="67517" cy:directed="1"/>
      <edge id="79173" label="ARNTL (GRN) MRPS23" source="67258" target="66738" cy:directed="1"/>
      <edge id="79172" label="ARNTL (GRN) FADD" source="67258" target="66921" cy:directed="1"/>
      <edge id="79171" label="ARNTL (GRN) CDKL2" source="67258" target="67482" cy:directed="1"/>
      <edge id="79170" label="ARNTL (GRN) POLR2C" source="67258" target="66527" cy:directed="1"/>
      <edge id="79169" label="ARNTL (GRN) PARN" source="67258" target="67495" cy:directed="1"/>
      <edge id="79168" label="ARNTL (GRN) TRUB2" source="67258" target="66987" cy:directed="1"/>
      <edge id="79167" label="ARNTL (GRN) ARMC9" source="67258" target="67490" cy:directed="1"/>
      <edge id="79166" label="ARNTL (GRN) CCT5" source="67258" target="66957" cy:directed="1"/>
      <edge id="79165" label="ARNTL (GRN) CD163" source="67258" target="66816" cy:directed="1"/>
      <edge id="79164" label="ARNTL (GRN) GEMIN7" source="67258" target="66803" cy:directed="1"/>
      <edge id="79163" label="ARNTL (GRN) SSR1" source="67258" target="66699" cy:directed="1"/>
      <edge id="79162" label="ARNTL (GRN) GALNT10" source="67258" target="67248" cy:directed="1"/>
      <edge id="79161" label="ARNTL (GRN) C19orf59" source="67258" target="66732" cy:directed="1"/>
      <edge id="79160" label="ARNTL (GRN) SYS1" source="67258" target="66590" cy:directed="1"/>
      <edge id="79159" label="ARNTL (GRN) ATIC" source="67258" target="67886" cy:directed="1"/>
      <edge id="79158" label="ARNTL (GRN) ALPL" source="67258" target="67136" cy:directed="1"/>
      <edge id="79157" label="ARNTL (GRN) ATP6V0E1" source="67258" target="67210" cy:directed="1"/>
      <edge id="79156" label="ARNTL (GRN) ACAA2" source="67258" target="66939" cy:directed="1"/>
      <edge id="79155" label="ARNTL (GRN) DSCR3" source="67258" target="67744" cy:directed="1"/>
      <edge id="79154" label="ARNTL (GRN) NDUFAF1" source="67258" target="67083" cy:directed="1"/>
      <edge id="79153" label="ARNTL (GRN) FGFR2" source="67258" target="67189" cy:directed="1"/>
      <edge id="79152" label="ARNTL (GRN) FICD" source="67258" target="66894" cy:directed="1"/>
      <edge id="79151" label="ARNTL (GRN) SEC23B" source="67258" target="66650" cy:directed="1"/>
      <edge id="79150" label="ARNTL (GRN) C9orf64" source="67258" target="67706" cy:directed="1"/>
      <edge id="79149" label="ARNTL (GRN) PCCB" source="67258" target="66759" cy:directed="1"/>
      <edge id="79148" label="ARNTL (GRN) DIEXF" source="67258" target="66584" cy:directed="1"/>
      <edge id="79147" label="ARNTL (GRN) C16orf70" source="67258" target="66928" cy:directed="1"/>
      <edge id="79146" label="ARNTL (GRN) TBXAS1" source="67258" target="66824" cy:directed="1"/>
      <edge id="79145" label="ARNTL (GRN) HN1" source="67258" target="66774" cy:directed="1"/>
      <edge id="79144" label="ARNTL (GRN) UQCC2" source="67258" target="66918" cy:directed="1"/>
      <edge id="79143" label="ARNTL (GRN) PARP1" source="67258" target="66571" cy:directed="1"/>
      <edge id="79142" label="ARNTL (GRN) MS4A4A" source="67258" target="66789" cy:directed="1"/>
      <edge id="79141" label="ARNTL (GRN) DAP3" source="67258" target="66538" cy:directed="1"/>
      <edge id="79140" label="ARNTL (GRN) GRB2" source="67258" target="66745" cy:directed="1"/>
      <edge id="79139" label="ARNTL (GRN) ZBED3" source="67258" target="67260" cy:directed="1"/>
      <edge id="79138" label="ARNTL (GRN) TRIP13" source="67258" target="66606" cy:directed="1"/>
      <edge id="79137" label="ARNTL (GRN) SLC7A7" source="67258" target="66683" cy:directed="1"/>
      <edge id="79136" label="ARNTL (GRN) C5" source="67258" target="66868" cy:directed="1"/>
      <edge id="79135" label="ARNTL (GRN) AHCY" source="67258" target="67222" cy:directed="1"/>
      <edge id="79134" label="ARNTL (GRN) AIFM1" source="67258" target="66469" cy:directed="1"/>
      <edge id="79133" label="ARNTL (GRN) UMPS" source="67258" target="66617" cy:directed="1"/>
      <edge id="79132" label="ARNTL (GRN) HYLS1" source="67258" target="66582" cy:directed="1"/>
      <edge id="79131" label="ARNTL (GRN) NECAB1" source="67258" target="66581" cy:directed="1"/>
      <edge id="79130" label="ARNTL (GRN) SNX25" source="67258" target="66437" cy:directed="1"/>
      <edge id="79129" label="ARNTL (GRN) FEN1" source="67258" target="67098" cy:directed="1"/>
      <edge id="79128" label="ARNTL (GRN) PRDX4" source="67258" target="66491" cy:directed="1"/>
      <edge id="79127" label="ARNTL (GRN) SSR3" source="67258" target="67259" cy:directed="1"/>
      <edge id="79126" label="ARNTL (GRN) TTPAL" source="67258" target="66906" cy:directed="1"/>
      <edge id="79125" label="ARNTL (GRN) ACAT1" source="67258" target="66862" cy:directed="1"/>
      <edge id="79124" label="ARNTL (GRN) S1PR4" source="67258" target="66499" cy:directed="1"/>
      <edge id="79123" label="ARNTL (GRN) TTC39A" source="67258" target="66495" cy:directed="1"/>
      <edge id="79122" label="ARNTL (GRN) PDIA4" source="67258" target="66893" cy:directed="1"/>
      <edge id="79121" label="ARNTL (GRN) GSTA4" source="67258" target="66512" cy:directed="1"/>
      <edge id="79120" label="ARNTL (GRN) ALOX5AP" source="67258" target="66855" cy:directed="1"/>
      <edge id="79119" label="ARNTL (GRN) TLCD1" source="67258" target="67130" cy:directed="1"/>
      <edge id="79118" label="ARNTL (GRN) KCNK1" source="67258" target="66479" cy:directed="1"/>
      <edge id="79117" label="ARNTL (GRN) MIS18A" source="67258" target="66480" cy:directed="1"/>
      <edge id="79116" label="ARNTL (GRN) TSPAN3" source="67258" target="66900" cy:directed="1"/>
      <edge id="79115" label="ARNTL (GRN) SNX30" source="67258" target="66853" cy:directed="1"/>
      <edge id="79114" label="ARNTL (GRN) ALG5" source="67258" target="66899" cy:directed="1"/>
      <edge id="79113" label="ARNTL (GRN) EPDR1" source="67258" target="66466" cy:directed="1"/>
      <edge id="79112" label="ARNTL (GRN) LRRK2" source="67258" target="66454" cy:directed="1"/>
      <edge id="79111" label="ARNTL (GRN) LYRM2" source="67258" target="66457" cy:directed="1"/>
      <edge id="79110" label="ARNTL (GRN) FITM2" source="67258" target="66453" cy:directed="1"/>
      <edge id="79109" label="ARNTL (GRN) MRPL3" source="67258" target="66465" cy:directed="1"/>
      <edge id="79108" label="ARNTL (GRN) ECE2" source="67258" target="66851" cy:directed="1"/>
      <edge id="79107" label="ARNTL (GRN) TFB2M" source="67258" target="66456" cy:directed="1"/>
      <edge id="79106" label="ELOVL1 (GCN) RCC1" source="67257" target="67242" cy:directed="1"/>
      <edge id="79105" label="C6orf211 (GCN) RCC1" source="67256" target="67242" cy:directed="1"/>
      <edge id="79104" label="FDFT1 (GCN) RCC1" source="67255" target="67242" cy:directed="1"/>
      <edge id="79103" label="SQRDL (GCN) RCC1" source="67254" target="67242" cy:directed="1"/>
      <edge id="79102" label="PFKFB2 (GCN) LRRK2" source="67253" target="66454" cy:directed="1"/>
      <edge id="79101" label="PFKFB2 (GCN) C2" source="67253" target="66509" cy:directed="1"/>
      <edge id="79100" label="LGMN (GCN) RCC1" source="67252" target="67242" cy:directed="1"/>
      <edge id="79099" label="PRDX3 (GCN) PYCR1" source="67251" target="66561" cy:directed="1"/>
      <edge id="79098" label="PRDX3 (GCN) CCNB1" source="67251" target="66439" cy:directed="1"/>
      <edge id="79097" label="SDHB (GCN) RCC1" source="67250" target="67242" cy:directed="1"/>
      <edge id="79096" label="CYP51A1 (GCN) RCC1" source="67249" target="67242" cy:directed="1"/>
      <edge id="79095" label="CYP51A1 (GCN) PSAT1" source="67249" target="66978" cy:directed="1"/>
      <edge id="79094" label="GALNT10 (GCN) RCC1" source="67248" target="67242" cy:directed="1"/>
      <edge id="79093" label="ZNF691 (GCN) CCNB1" source="67247" target="66439" cy:directed="1"/>
      <edge id="79092" label="TMEM243 (GCN) TFAP2C" source="67246" target="67172" cy:directed="1"/>
      <edge id="79091" label="TMEM243 (GCN) LAMP3" source="67246" target="67126" cy:directed="1"/>
      <edge id="79090" label="SLC25A16 (GCN) PSAT1" source="67245" target="66978" cy:directed="1"/>
      <edge id="79089" label="RPN2 (GCN) ZWINT" source="67244" target="66435" cy:directed="1"/>
      <edge id="79088" label="RPN2 (GCN) RCC1" source="67244" target="67242" cy:directed="1"/>
      <edge id="79087" label="ATAD3C (GCN) RCC1" source="67243" target="67242" cy:directed="1"/>
      <edge id="79086" label="RCC1 (GCN) C14orf119" source="67242" target="67787" cy:directed="1"/>
      <edge id="79085" label="RCC1 (GCN) CD180" source="67242" target="66833" cy:directed="1"/>
      <edge id="79084" label="SND1 (GCN) RCC1" source="67241" target="67242" cy:directed="1"/>
      <edge id="79083" label="HMGB3 (GCN) CDS1" source="67240" target="67975" cy:directed="1"/>
      <edge id="79082" label="HMGB3 (GCN) OSCP1" source="67240" target="67966" cy:directed="1"/>
      <edge id="79081" label="HMGB3 (GCN) AK7" source="67240" target="67965" cy:directed="1"/>
      <edge id="79080" label="HMGB3 (GCN) ZMYND12" source="67240" target="67964" cy:directed="1"/>
      <edge id="79079" label="HMGB3 (GCN) SLC44A4" source="67240" target="67413" cy:directed="1"/>
      <edge id="79078" label="HMGB3 (GCN) LGMN" source="67240" target="67252" cy:directed="1"/>
      <edge id="79077" label="HMGB3 (GCN) PLA2G10" source="67240" target="67885" cy:directed="1"/>
      <edge id="79076" label="HMGB3 (GCN) MS4A4A" source="67240" target="66789" cy:directed="1"/>
      <edge id="79075" label="HMGB3 (GCN) ALPL" source="67240" target="67136" cy:directed="1"/>
      <edge id="79074" label="HMGB3 (GCN) TMEM164" source="67240" target="66994" cy:directed="1"/>
      <edge id="79073" label="HMGB3 (GCN) CD163" source="67240" target="66816" cy:directed="1"/>
      <edge id="79072" label="HMGB3 (GCN) DYX1C1" source="67240" target="66654" cy:directed="1"/>
      <edge id="79071" label="HMGB3 (GCN) LAMP3" source="67240" target="67126" cy:directed="1"/>
      <edge id="79070" label="HMGB3 (GCN) TSPAN3" source="67240" target="66900" cy:directed="1"/>
      <edge id="79069" label="MRPS16 (GCN) ZWINT" source="67239" target="66435" cy:directed="1"/>
      <edge id="79068" label="MRPS16 (GCN) RCC1" source="67239" target="67242" cy:directed="1"/>
      <edge id="79067" label="ARL11 (GCN) C19orf59" source="67238" target="66732" cy:directed="1"/>
      <edge id="79066" label="TSPYL5 (GCN) ZWINT" source="67237" target="66435" cy:directed="1"/>
      <edge id="79065" label="GALE (GCN) RCC1" source="67236" target="67242" cy:directed="1"/>
      <edge id="79064" label="DFFA (GCN) CHEK1" source="67235" target="67282" cy:directed="1"/>
      <edge id="79063" label="DFFA (GCN) CCT3" source="67235" target="66440" cy:directed="1"/>
      <edge id="79062" label="DFFA (GCN) CCNB1" source="67235" target="66439" cy:directed="1"/>
      <edge id="79061" label="DFFA (GCN) AURKA" source="67235" target="66969" cy:directed="1"/>
      <edge id="79060" label="DFFA (GCN) TIMELESS" source="67235" target="66451" cy:directed="1"/>
      <edge id="79059" label="GRHL2 (GCN) ALPL" source="67234" target="67136" cy:directed="1"/>
      <edge id="79058" label="GRHL2 (GCN) DUOX1" source="67234" target="66690" cy:directed="1"/>
      <edge id="79057" label="RFC4 (GCN) TXNDC17" source="67233" target="67097" cy:directed="1"/>
      <edge id="79056" label="RFC4 (GCN) ZWINT" source="67233" target="66435" cy:directed="1"/>
      <edge id="79055" label="RFC4 (GCN) PLK1" source="67233" target="67231" cy:directed="1"/>
      <edge id="79054" label="RFC4 (GCN) PRDX4" source="67233" target="66491" cy:directed="1"/>
      <edge id="79053" label="RFC4 (GCN) CCT3" source="67233" target="66440" cy:directed="1"/>
      <edge id="79052" label="RFC4 (GCN) DAP3" source="67233" target="66538" cy:directed="1"/>
      <edge id="79051" label="RFC4 (GCN) SFXN4" source="67233" target="66528" cy:directed="1"/>
      <edge id="79050" label="RFC4 (GCN) CCNB1" source="67233" target="66439" cy:directed="1"/>
      <edge id="79049" label="POC1A (GCN) ZWINT" source="67232" target="66435" cy:directed="1"/>
      <edge id="79048" label="PLK1 (GCN) SRD5A3" source="67231" target="66591" cy:directed="1"/>
      <edge id="79047" label="PLK1 (GCN) SHMT2" source="67231" target="66973" cy:directed="1"/>
      <edge id="79046" label="PLK1 (GCN) SLC39A11" source="67231" target="67078" cy:directed="1"/>
      <edge id="79045" label="PLK1 (GCN) MRPS33" source="67231" target="66624" cy:directed="1"/>
      <edge id="79044" label="PLK1 (GCN) CPSF3" source="67231" target="66575" cy:directed="1"/>
      <edge id="79043" label="PLK1 (GCN) MRPS16" source="67231" target="67239" cy:directed="1"/>
      <edge id="79042" label="PLK1 (GCN) C1orf85" source="67231" target="66579" cy:directed="1"/>
      <edge id="79041" label="PLK1 (GCN) ISCA2" source="67231" target="66721" cy:directed="1"/>
      <edge id="79040" label="PLK1 (GCN) CCT3" source="67231" target="66440" cy:directed="1"/>
      <edge id="79039" label="PLK1 (GCN) CENPH" source="67231" target="66539" cy:directed="1"/>
      <edge id="79038" label="PLK1 (GCN) TMEM69" source="67231" target="66536" cy:directed="1"/>
      <edge id="79037" label="PLK1 (GCN) ALG1" source="67231" target="66441" cy:directed="1"/>
      <edge id="79036" label="PLK1 (GCN) DAP3" source="67231" target="66538" cy:directed="1"/>
      <edge id="79035" label="PLK1 (GCN) AIFM1" source="67231" target="66469" cy:directed="1"/>
      <edge id="79034" label="PLK1 (GCN) SFXN4" source="67231" target="66528" cy:directed="1"/>
      <edge id="79033" label="PLK1 (GCN) RCC1" source="67231" target="67242" cy:directed="1"/>
      <edge id="79032" label="PLK1 (GCN) TIMELESS" source="67231" target="66451" cy:directed="1"/>
      <edge id="79031" label="PLK1 (GCN) RAD51" source="67231" target="66972" cy:directed="1"/>
      <edge id="79030" label="PLK1 (GCN) HMGB3" source="67231" target="67240" cy:directed="1"/>
      <edge id="79029" label="PLK1 (GCN) IDH2" source="67231" target="67135" cy:directed="1"/>
      <edge id="79028" label="PLK1 (GCN) ACAD8" source="67231" target="67877" cy:directed="1"/>
      <edge id="79027" label="PLK1 (GCN) POC1A" source="67231" target="67232" cy:directed="1"/>
      <edge id="79026" label="PLK1 (GCN) KIAA0101" source="67231" target="66461" cy:directed="1"/>
      <edge id="79025" label="PLK1 (GCN) AURKA" source="67231" target="66969" cy:directed="1"/>
      <edge id="79024" label="PLK1 (GCN) ZWINT" source="67231" target="66435" cy:directed="1"/>
      <edge id="79023" label="PLK1 (GCN) CCNB1" source="67231" target="66439" cy:directed="1"/>
      <edge id="79022" label="USF1 (GRN) ACN9" source="67230" target="67615" cy:directed="1"/>
      <edge id="79021" label="USF1 (GRN) TXNDC5" source="67230" target="67871" cy:directed="1"/>
      <edge id="79020" label="USF1 (GRN) PLA2G10" source="67230" target="67885" cy:directed="1"/>
      <edge id="79019" label="USF1 (GRN) RPN1" source="67230" target="67823" cy:directed="1"/>
      <edge id="79018" label="USF1 (GRN) UQCRC1" source="67230" target="66706" cy:directed="1"/>
      <edge id="79017" label="USF1 (GRN) LPCAT1" source="67230" target="67822" cy:directed="1"/>
      <edge id="79016" label="USF1 (GRN) JAGN1" source="67230" target="66847" cy:directed="1"/>
      <edge id="79015" label="USF1 (GRN) ARV1" source="67230" target="67826" cy:directed="1"/>
      <edge id="79014" label="USF1 (GRN) KNOP1" source="67230" target="67884" cy:directed="1"/>
      <edge id="79013" label="USF1 (GRN) MS4A4A" source="67230" target="66789" cy:directed="1"/>
      <edge id="79012" label="USF1 (GRN) TMEM254" source="67230" target="67883" cy:directed="1"/>
      <edge id="79011" label="USF1 (GRN) POU2F3" source="67230" target="67870" cy:directed="1"/>
      <edge id="79010" label="USF1 (GRN) LSM5" source="67230" target="67063" cy:directed="1"/>
      <edge id="79009" label="USF1 (GRN) BPNT1" source="67230" target="67327" cy:directed="1"/>
      <edge id="79008" label="USF1 (GRN) KBTBD7" source="67230" target="67603" cy:directed="1"/>
      <edge id="79007" label="USF1 (GRN) ACOT1" source="67230" target="66931" cy:directed="1"/>
      <edge id="79006" label="USF1 (GRN) POLR3C" source="67230" target="67612" cy:directed="1"/>
      <edge id="79005" label="USF1 (GRN) TMCO4" source="67230" target="67882" cy:directed="1"/>
      <edge id="79004" label="USF1 (GRN) CDC123" source="67230" target="66811" cy:directed="1"/>
      <edge id="79003" label="USF1 (GRN) RPUSD4" source="67230" target="67596" cy:directed="1"/>
      <edge id="79002" label="USF1 (GRN) PPIL1" source="67230" target="67876" cy:directed="1"/>
      <edge id="79001" label="USF1 (GRN) FUNDC1" source="67230" target="66652" cy:directed="1"/>
      <edge id="79000" label="USF1 (GRN) TP53" source="67230" target="67270" cy:directed="1"/>
      <edge id="78999" label="USF1 (GRN) SIGLEC10" source="67230" target="67511" cy:directed="1"/>
      <edge id="78998" label="USF1 (GRN) MRPL47" source="67230" target="67821" cy:directed="1"/>
      <edge id="78997" label="USF1 (GRN) EXOSC2" source="67230" target="67514" cy:directed="1"/>
      <edge id="78996" label="USF1 (GRN) NKX2-1" source="67230" target="67589" cy:directed="1"/>
      <edge id="78995" label="USF1 (GRN) NUDT16" source="67230" target="67203" cy:directed="1"/>
      <edge id="78994" label="USF1 (GRN) PCGF1" source="67230" target="67812" cy:directed="1"/>
      <edge id="78993" label="USF1 (GRN) COA6" source="67230" target="66953" cy:directed="1"/>
      <edge id="78992" label="USF1 (GRN) PTCD2" source="67230" target="66793" cy:directed="1"/>
      <edge id="78991" label="USF1 (GRN) FTSJ2" source="67230" target="66739" cy:directed="1"/>
      <edge id="78990" label="USF1 (GRN) C14orf119" source="67230" target="67787" cy:directed="1"/>
      <edge id="78989" label="USF1 (GRN) EMC7" source="67230" target="67780" cy:directed="1"/>
      <edge id="78988" label="USF1 (GRN) C11orf1" source="67230" target="66787" cy:directed="1"/>
      <edge id="78987" label="USF1 (GRN) PCBD2" source="67230" target="66740" cy:directed="1"/>
      <edge id="78986" label="USF1 (GRN) TMEM192" source="67230" target="67518" cy:directed="1"/>
      <edge id="78985" label="USF1 (GRN) SPTSSA" source="67230" target="67820" cy:directed="1"/>
      <edge id="78984" label="USF1 (GRN) DYX1C1" source="67230" target="66654" cy:directed="1"/>
      <edge id="78983" label="USF1 (GRN) UBLCP1" source="67230" target="67777" cy:directed="1"/>
      <edge id="78982" label="USF1 (GRN) SLC46A1" source="67230" target="66545" cy:directed="1"/>
      <edge id="78981" label="USF1 (GRN) MARS2" source="67230" target="67631" cy:directed="1"/>
      <edge id="78980" label="USF1 (GRN) CHAMP1" source="67230" target="67575" cy:directed="1"/>
      <edge id="78979" label="USF1 (GRN) DCLRE1A" source="67230" target="67326" cy:directed="1"/>
      <edge id="78978" label="USF1 (GRN) CHAC2" source="67230" target="67618" cy:directed="1"/>
      <edge id="78977" label="USF1 (GRN) PSMG1" source="67230" target="67522" cy:directed="1"/>
      <edge id="78976" label="USF1 (GRN) H2AFY" source="67230" target="67662" cy:directed="1"/>
      <edge id="78975" label="USF1 (GRN) E2F4" source="67230" target="67501" cy:directed="1"/>
      <edge id="78974" label="USF1 (GRN) SUV39H1" source="67230" target="67722" cy:directed="1"/>
      <edge id="78973" label="USF1 (GRN) FASTKD5" source="67230" target="67869" cy:directed="1"/>
      <edge id="78972" label="USF1 (GRN) CHCHD4" source="67230" target="67773" cy:directed="1"/>
      <edge id="78971" label="USF1 (GRN) CLPTM1L" source="67230" target="67165" cy:directed="1"/>
      <edge id="78970" label="USF1 (GRN) ADSL" source="67230" target="66651" cy:directed="1"/>
      <edge id="78969" label="USF1 (GRN) CA12" source="67230" target="67516" cy:directed="1"/>
      <edge id="78968" label="USF1 (GRN) UBE2D4" source="67230" target="67768" cy:directed="1"/>
      <edge id="78967" label="USF1 (GRN) PET112" source="67230" target="66697" cy:directed="1"/>
      <edge id="78966" label="USF1 (GRN) DSN1" source="67230" target="67809" cy:directed="1"/>
      <edge id="78965" label="USF1 (GRN) METTL1" source="67230" target="66825" cy:directed="1"/>
      <edge id="78964" label="USF1 (GRN) POLR1C" source="67230" target="67554" cy:directed="1"/>
      <edge id="78963" label="USF1 (GRN) MFNG" source="67230" target="67646" cy:directed="1"/>
      <edge id="78962" label="USF1 (GRN) MRPS23" source="67230" target="66738" cy:directed="1"/>
      <edge id="78961" label="USF1 (GRN) SLC25A20" source="67230" target="66949" cy:directed="1"/>
      <edge id="78960" label="USF1 (GRN) TSR3" source="67230" target="66815" cy:directed="1"/>
      <edge id="78959" label="USF1 (GRN) KANK1" source="67230" target="67146" cy:directed="1"/>
      <edge id="78958" label="USF1 (GRN) MRPS15" source="67230" target="67095" cy:directed="1"/>
      <edge id="78957" label="USF1 (GRN) GCDH" source="67230" target="66938" cy:directed="1"/>
      <edge id="78956" label="USF1 (GRN) SAYSD1" source="67230" target="67544" cy:directed="1"/>
      <edge id="78955" label="USF1 (GRN) BCCIP" source="67230" target="67881" cy:directed="1"/>
      <edge id="78954" label="USF1 (GRN) POLR2D" source="67230" target="67034" cy:directed="1"/>
      <edge id="78953" label="USF1 (GRN) DHTKD1" source="67230" target="67699" cy:directed="1"/>
      <edge id="78952" label="USF1 (GRN) CDK2AP2" source="67230" target="67808" cy:directed="1"/>
      <edge id="78951" label="USF1 (GRN) DEPTOR" source="67230" target="67537" cy:directed="1"/>
      <edge id="78950" label="USF1 (GRN) SMUG1" source="67230" target="67021" cy:directed="1"/>
      <edge id="78949" label="USF1 (GRN) CDK7" source="67230" target="67874" cy:directed="1"/>
      <edge id="78948" label="USF1 (GRN) MRPS33" source="67230" target="66624" cy:directed="1"/>
      <edge id="78947" label="USF1 (GRN) ATP5A1" source="67230" target="67533" cy:directed="1"/>
      <edge id="78946" label="USF1 (GRN) GYG2" source="67230" target="67880" cy:directed="1"/>
      <edge id="78945" label="USF1 (GRN) TMEM97" source="67230" target="67865" cy:directed="1"/>
      <edge id="78944" label="USF1 (GRN) SNTB1" source="67230" target="67611" cy:directed="1"/>
      <edge id="78943" label="USF1 (GRN) ISCA2" source="67230" target="66721" cy:directed="1"/>
      <edge id="78942" label="USF1 (GRN) HPS6" source="67230" target="67627" cy:directed="1"/>
      <edge id="78941" label="USF1 (GRN) PSMD14" source="67230" target="66963" cy:directed="1"/>
      <edge id="78940" label="USF1 (GRN) TBCE" source="67230" target="66955" cy:directed="1"/>
      <edge id="78939" label="USF1 (GRN) MPI" source="67230" target="66758" cy:directed="1"/>
      <edge id="78938" label="USF1 (GRN) C6orf203" source="67230" target="67681" cy:directed="1"/>
      <edge id="78937" label="USF1 (GRN) CBS" source="67230" target="67494" cy:directed="1"/>
      <edge id="78936" label="USF1 (GRN) AIMP2" source="67230" target="66782" cy:directed="1"/>
      <edge id="78935" label="USF1 (GRN) GLE1" source="67230" target="67807" cy:directed="1"/>
      <edge id="78934" label="USF1 (GRN) POLR3K" source="67230" target="66684" cy:directed="1"/>
      <edge id="78933" label="USF1 (GRN) PSMC2" source="67230" target="66767" cy:directed="1"/>
      <edge id="78932" label="USF1 (GRN) RFT1" source="67230" target="67289" cy:directed="1"/>
      <edge id="78931" label="USF1 (GRN) PUS1" source="67230" target="67517" cy:directed="1"/>
      <edge id="78930" label="USF1 (GRN) PIP4K2C" source="67230" target="67879" cy:directed="1"/>
      <edge id="78929" label="USF1 (GRN) PNPO" source="67230" target="67797" cy:directed="1"/>
      <edge id="78928" label="USF1 (GRN) GSR" source="67230" target="67632" cy:directed="1"/>
      <edge id="78927" label="USF1 (GRN) IPO13" source="67230" target="66874" cy:directed="1"/>
      <edge id="78926" label="USF1 (GRN) GEMIN6" source="67230" target="67089" cy:directed="1"/>
      <edge id="78925" label="USF1 (GRN) MTX2" source="67230" target="66658" cy:directed="1"/>
      <edge id="78924" label="USF1 (GRN) EIF3B" source="67230" target="67510" cy:directed="1"/>
      <edge id="78923" label="USF1 (GRN) CXCL17" source="67230" target="67862" cy:directed="1"/>
      <edge id="78922" label="USF1 (GRN) IFT57" source="67230" target="67878" cy:directed="1"/>
      <edge id="78921" label="USF1 (GRN) ICMT" source="67230" target="67698" cy:directed="1"/>
      <edge id="78920" label="USF1 (GRN) SLC30A6" source="67230" target="67166" cy:directed="1"/>
      <edge id="78919" label="USF1 (GRN) NOP56" source="67230" target="67507" cy:directed="1"/>
      <edge id="78918" label="USF1 (GRN) MPV17" source="67230" target="66623" cy:directed="1"/>
      <edge id="78917" label="USF1 (GRN) GPT2" source="67230" target="67143" cy:directed="1"/>
      <edge id="78916" label="USF1 (GRN) RPH3AL" source="67230" target="67141" cy:directed="1"/>
      <edge id="78915" label="USF1 (GRN) GTF3C6" source="67230" target="66775" cy:directed="1"/>
      <edge id="78914" label="USF1 (GRN) EBNA1BP2" source="67230" target="67861" cy:directed="1"/>
      <edge id="78913" label="USF1 (GRN) PSMD2" source="67230" target="67503" cy:directed="1"/>
      <edge id="78912" label="USF1 (GRN) PSME3" source="67230" target="67500" cy:directed="1"/>
      <edge id="78911" label="USF1 (GRN) ITPK1" source="67230" target="67796" cy:directed="1"/>
      <edge id="78910" label="USF1 (GRN) FADD" source="67230" target="66921" cy:directed="1"/>
      <edge id="78909" label="USF1 (GRN) THAP8" source="67230" target="66795" cy:directed="1"/>
      <edge id="78908" label="USF1 (GRN) CNPY2" source="67230" target="67214" cy:directed="1"/>
      <edge id="78907" label="USF1 (GRN) SCD" source="67230" target="67138" cy:directed="1"/>
      <edge id="78906" label="USF1 (GRN) BEND3" source="67230" target="67858" cy:directed="1"/>
      <edge id="78905" label="USF1 (GRN) METTL7B" source="67230" target="66901" cy:directed="1"/>
      <edge id="78904" label="USF1 (GRN) ARMC9" source="67230" target="67490" cy:directed="1"/>
      <edge id="78903" label="USF1 (GRN) C9orf156" source="67230" target="66595" cy:directed="1"/>
      <edge id="78902" label="USF1 (GRN) YKT6" source="67230" target="66724" cy:directed="1"/>
      <edge id="78901" label="USF1 (GRN) QDPR" source="67230" target="67488" cy:directed="1"/>
      <edge id="78900" label="USF1 (GRN) C19orf59" source="67230" target="66732" cy:directed="1"/>
      <edge id="78899" label="USF1 (GRN) RPP40" source="67230" target="66644" cy:directed="1"/>
      <edge id="78898" label="USF1 (GRN) ACAD8" source="67230" target="67877" cy:directed="1"/>
      <edge id="78897" label="USF1 (GRN) PES1" source="67230" target="66730" cy:directed="1"/>
      <edge id="78896" label="USF1 (GRN) KARS" source="67230" target="67486" cy:directed="1"/>
      <edge id="78895" label="USF1 (GRN) PABPC1L" source="67230" target="67483" cy:directed="1"/>
      <edge id="78894" label="USF1 (GRN) DHCR24" source="67230" target="67816" cy:directed="1"/>
      <edge id="78893" label="USF1 (GRN) ARSE" source="67230" target="67747" cy:directed="1"/>
      <edge id="78892" label="USF1 (GRN) SGPP2" source="67230" target="67856" cy:directed="1"/>
      <edge id="78891" label="USF1 (GRN) GOLT1A" source="67230" target="67855" cy:directed="1"/>
      <edge id="78890" label="USF1 (GRN) ACAA2" source="67230" target="66939" cy:directed="1"/>
      <edge id="78889" label="USF1 (GRN) NCMAP" source="67230" target="67748" cy:directed="1"/>
      <edge id="78888" label="USF1 (GRN) SLAMF8" source="67230" target="67029" cy:directed="1"/>
      <edge id="78887" label="USF1 (GRN) MMACHC" source="67230" target="66647" cy:directed="1"/>
      <edge id="78886" label="USF1 (GRN) CDC25C" source="67230" target="67745" cy:directed="1"/>
      <edge id="78885" label="USF1 (GRN) SLC22A3" source="67230" target="66967" cy:directed="1"/>
      <edge id="78884" label="USF1 (GRN) CDKL2" source="67230" target="67482" cy:directed="1"/>
      <edge id="78883" label="USF1 (GRN) ZWINT" source="67230" target="66435" cy:directed="1"/>
      <edge id="78882" label="USF1 (GRN) C9orf64" source="67230" target="67706" cy:directed="1"/>
      <edge id="78881" label="USF1 (GRN) CHAF1A" source="67230" target="67053" cy:directed="1"/>
      <edge id="78880" label="USF1 (GRN) ZSWIM1" source="67230" target="67070" cy:directed="1"/>
      <edge id="78879" label="USF1 (GRN) NIF3L1" source="67230" target="66806" cy:directed="1"/>
      <edge id="78878" label="USF1 (GRN) METTL6" source="67230" target="66960" cy:directed="1"/>
      <edge id="78877" label="USF1 (GRN) COQ2" source="67230" target="66843" cy:directed="1"/>
      <edge id="78876" label="USF1 (GRN) CD163" source="67230" target="66816" cy:directed="1"/>
      <edge id="78875" label="USF1 (GRN) PCSK9" source="67230" target="67125" cy:directed="1"/>
      <edge id="78874" label="USF1 (GRN) C5orf63" source="67230" target="67066" cy:directed="1"/>
      <edge id="78873" label="USF1 (GRN) ELOVL1" source="67230" target="67257" cy:directed="1"/>
      <edge id="78872" label="USF1 (GRN) FASTKD3" source="67230" target="66834" cy:directed="1"/>
      <edge id="78871" label="USF1 (GRN) CD180" source="67230" target="66833" cy:directed="1"/>
      <edge id="78870" label="USF1 (GRN) LSS" source="67230" target="66566" cy:directed="1"/>
      <edge id="78869" label="USF1 (GRN) MRPL44" source="67230" target="66707" cy:directed="1"/>
      <edge id="78868" label="USF1 (GRN) MUL1" source="67230" target="66531" cy:directed="1"/>
      <edge id="78867" label="USF1 (GRN) TDRKH" source="67230" target="66621" cy:directed="1"/>
      <edge id="78866" label="USF1 (GRN) PDHB" source="67230" target="66448" cy:directed="1"/>
      <edge id="78865" label="USF1 (GRN) DCTN5" source="67230" target="67093" cy:directed="1"/>
      <edge id="78864" label="USF1 (GRN) C10orf2" source="67230" target="66837" cy:directed="1"/>
      <edge id="78863" label="USF1 (GRN) C3AR1" source="67230" target="66577" cy:directed="1"/>
      <edge id="78862" label="USF1 (GRN) ITGB2" source="67230" target="66649" cy:directed="1"/>
      <edge id="78861" label="USF1 (GRN) LTA4H" source="67230" target="67223" cy:directed="1"/>
      <edge id="78860" label="USF1 (GRN) TACO1" source="67230" target="66790" cy:directed="1"/>
      <edge id="78859" label="USF1 (GRN) C6orf211" source="67230" target="67256" cy:directed="1"/>
      <edge id="78858" label="USF1 (GRN) DOPEY2" source="67230" target="67057" cy:directed="1"/>
      <edge id="78857" label="USF1 (GRN) SWSAP1" source="67230" target="67090" cy:directed="1"/>
      <edge id="78856" label="USF1 (GRN) EEF1E1" source="67230" target="67220" cy:directed="1"/>
      <edge id="78855" label="USF1 (GRN) MMAB" source="67230" target="67187" cy:directed="1"/>
      <edge id="78854" label="USF1 (GRN) FDFT1" source="67230" target="67255" cy:directed="1"/>
      <edge id="78853" label="USF1 (GRN) SLC25A4" source="67230" target="66734" cy:directed="1"/>
      <edge id="78852" label="USF1 (GRN) HARBI1" source="67230" target="67051" cy:directed="1"/>
      <edge id="78851" label="USF1 (GRN) SQRDL" source="67230" target="67254" cy:directed="1"/>
      <edge id="78850" label="USF1 (GRN) SERPINF2" source="67230" target="67177" cy:directed="1"/>
      <edge id="78849" label="USF1 (GRN) NUDT5" source="67230" target="66924" cy:directed="1"/>
      <edge id="78848" label="USF1 (GRN) NDUFS1" source="67230" target="66830" cy:directed="1"/>
      <edge id="78847" label="USF1 (GRN) TMEM45B" source="67230" target="67060" cy:directed="1"/>
      <edge id="78846" label="USF1 (GRN) PFKFB2" source="67230" target="67253" cy:directed="1"/>
      <edge id="78845" label="USF1 (GRN) FLRT3" source="67230" target="66554" cy:directed="1"/>
      <edge id="78844" label="USF1 (GRN) VPS33A" source="67230" target="66802" cy:directed="1"/>
      <edge id="78843" label="USF1 (GRN) LGMN" source="67230" target="67252" cy:directed="1"/>
      <edge id="78842" label="USF1 (GRN) C19orf40" source="67230" target="67037" cy:directed="1"/>
      <edge id="78841" label="USF1 (GRN) IRAK1" source="67230" target="66618" cy:directed="1"/>
      <edge id="78840" label="USF1 (GRN) PRDX3" source="67230" target="67251" cy:directed="1"/>
      <edge id="78839" label="USF1 (GRN) TMA16" source="67230" target="67043" cy:directed="1"/>
      <edge id="78838" label="USF1 (GRN) EIF2AK1" source="67230" target="67048" cy:directed="1"/>
      <edge id="78837" label="USF1 (GRN) MRPL27" source="67230" target="66813" cy:directed="1"/>
      <edge id="78836" label="USF1 (GRN) ACP5" source="67230" target="66885" cy:directed="1"/>
      <edge id="78835" label="USF1 (GRN) EXO5" source="67230" target="66703" cy:directed="1"/>
      <edge id="78834" label="USF1 (GRN) CISD2" source="67230" target="66757" cy:directed="1"/>
      <edge id="78833" label="USF1 (GRN) SDHC" source="67230" target="66950" cy:directed="1"/>
      <edge id="78832" label="USF1 (GRN) WDR89" source="67230" target="67114" cy:directed="1"/>
      <edge id="78831" label="USF1 (GRN) FH" source="67230" target="66947" cy:directed="1"/>
      <edge id="78830" label="USF1 (GRN) RAB42" source="67230" target="66777" cy:directed="1"/>
      <edge id="78829" label="USF1 (GRN) SDHB" source="67230" target="67250" cy:directed="1"/>
      <edge id="78828" label="USF1 (GRN) C14orf1" source="67230" target="66902" cy:directed="1"/>
      <edge id="78827" label="USF1 (GRN) FHDC1" source="67230" target="67170" cy:directed="1"/>
      <edge id="78826" label="USF1 (GRN) PCCB" source="67230" target="66759" cy:directed="1"/>
      <edge id="78825" label="USF1 (GRN) ASAH1" source="67230" target="66764" cy:directed="1"/>
      <edge id="78824" label="USF1 (GRN) CYP51A1" source="67230" target="67249" cy:directed="1"/>
      <edge id="78823" label="USF1 (GRN) FAM103A1" source="67230" target="66784" cy:directed="1"/>
      <edge id="78822" label="USF1 (GRN) ARHGEF19" source="67230" target="66709" cy:directed="1"/>
      <edge id="78821" label="USF1 (GRN) POLR3B" source="67230" target="66762" cy:directed="1"/>
      <edge id="78820" label="USF1 (GRN) SEPHS2" source="67230" target="66656" cy:directed="1"/>
      <edge id="78819" label="USF1 (GRN) NFS1" source="67230" target="66760" cy:directed="1"/>
      <edge id="78818" label="USF1 (GRN) ASAH2B" source="67230" target="66818" cy:directed="1"/>
      <edge id="78817" label="USF1 (GRN) ARPC1B" source="67230" target="66716" cy:directed="1"/>
      <edge id="78816" label="USF1 (GRN) STEAP3" source="67230" target="67202" cy:directed="1"/>
      <edge id="78815" label="USF1 (GRN) TSFM" source="67230" target="66750" cy:directed="1"/>
      <edge id="78814" label="USF1 (GRN) LEO1" source="67230" target="66708" cy:directed="1"/>
      <edge id="78813" label="USF1 (GRN) L2HGDH" source="67230" target="66746" cy:directed="1"/>
      <edge id="78812" label="USF1 (GRN) XYLB" source="67230" target="66742" cy:directed="1"/>
      <edge id="78811" label="USF1 (GRN) GALNT10" source="67230" target="67248" cy:directed="1"/>
      <edge id="78810" label="USF1 (GRN) HMBS" source="67230" target="67006" cy:directed="1"/>
      <edge id="78809" label="USF1 (GRN) SRD5A1" source="67230" target="66866" cy:directed="1"/>
      <edge id="78808" label="USF1 (GRN) METTL2A" source="67230" target="67215" cy:directed="1"/>
      <edge id="78807" label="USF1 (GRN) MRPL13" source="67230" target="66914" cy:directed="1"/>
      <edge id="78806" label="USF1 (GRN) MTCH2" source="67230" target="66937" cy:directed="1"/>
      <edge id="78805" label="USF1 (GRN) C1QBP" source="67230" target="66534" cy:directed="1"/>
      <edge id="78804" label="USF1 (GRN) SLC26A9" source="67230" target="67212" cy:directed="1"/>
      <edge id="78803" label="USF1 (GRN) EHMT2" source="67230" target="66876" cy:directed="1"/>
      <edge id="78802" label="USF1 (GRN) CPT2" source="67230" target="66770" cy:directed="1"/>
      <edge id="78801" label="USF1 (GRN) TMEM92" source="67230" target="66726" cy:directed="1"/>
      <edge id="78800" label="USF1 (GRN) GLB1" source="67230" target="66660" cy:directed="1"/>
      <edge id="78799" label="USF1 (GRN) ZNF691" source="67230" target="67247" cy:directed="1"/>
      <edge id="78798" label="USF1 (GRN) ERAL1" source="67230" target="66549" cy:directed="1"/>
      <edge id="78797" label="USF1 (GRN) TMEM243" source="67230" target="67246" cy:directed="1"/>
      <edge id="78796" label="USF1 (GRN) MMP28" source="67230" target="66756" cy:directed="1"/>
      <edge id="78795" label="USF1 (GRN) LACTB2" source="67230" target="66763" cy:directed="1"/>
      <edge id="78794" label="USF1 (GRN) SLC25A16" source="67230" target="67245" cy:directed="1"/>
      <edge id="78793" label="USF1 (GRN) RPN2" source="67230" target="67244" cy:directed="1"/>
      <edge id="78792" label="USF1 (GRN) DUOX1" source="67230" target="66690" cy:directed="1"/>
      <edge id="78791" label="USF1 (GRN) SSBP1" source="67230" target="66636" cy:directed="1"/>
      <edge id="78790" label="USF1 (GRN) CRB3" source="67230" target="67209" cy:directed="1"/>
      <edge id="78789" label="USF1 (GRN) ATAD3C" source="67230" target="67243" cy:directed="1"/>
      <edge id="78788" label="USF1 (GRN) PARS2" source="67230" target="66682" cy:directed="1"/>
      <edge id="78787" label="USF1 (GRN) FAM118B" source="67230" target="66936" cy:directed="1"/>
      <edge id="78786" label="USF1 (GRN) RCC1" source="67230" target="67242" cy:directed="1"/>
      <edge id="78785" label="USF1 (GRN) SYK" source="67230" target="66679" cy:directed="1"/>
      <edge id="78784" label="USF1 (GRN) SND1" source="67230" target="67241" cy:directed="1"/>
      <edge id="78783" label="USF1 (GRN) HMGB3" source="67230" target="67240" cy:directed="1"/>
      <edge id="78782" label="USF1 (GRN) CNDP2" source="67230" target="66603" cy:directed="1"/>
      <edge id="78781" label="USF1 (GRN) ICT1" source="67230" target="66675" cy:directed="1"/>
      <edge id="78780" label="USF1 (GRN) SPRYD4" source="67230" target="66676" cy:directed="1"/>
      <edge id="78779" label="USF1 (GRN) PARP1" source="67230" target="66571" cy:directed="1"/>
      <edge id="78778" label="USF1 (GRN) CNIH4" source="67230" target="67107" cy:directed="1"/>
      <edge id="78777" label="USF1 (GRN) KCTD14" source="67230" target="66867" cy:directed="1"/>
      <edge id="78776" label="USF1 (GRN) SYS1" source="67230" target="66590" cy:directed="1"/>
      <edge id="78775" label="USF1 (GRN) NDUFAF1" source="67230" target="67083" cy:directed="1"/>
      <edge id="78774" label="USF1 (GRN) ADORA2B" source="67230" target="67207" cy:directed="1"/>
      <edge id="78773" label="USF1 (GRN) TTI2" source="67230" target="66655" cy:directed="1"/>
      <edge id="78772" label="USF1 (GRN) PCK2" source="67230" target="66478" cy:directed="1"/>
      <edge id="78771" label="USF1 (GRN) SEC23B" source="67230" target="66650" cy:directed="1"/>
      <edge id="78770" label="USF1 (GRN) IRX2" source="67230" target="66694" cy:directed="1"/>
      <edge id="78769" label="USF1 (GRN) DIEXF" source="67230" target="66584" cy:directed="1"/>
      <edge id="78768" label="USF1 (GRN) ELMO3" source="67230" target="67028" cy:directed="1"/>
      <edge id="78767" label="USF1 (GRN) TRIP13" source="67230" target="66606" cy:directed="1"/>
      <edge id="78766" label="USF1 (GRN) COPG1" source="67230" target="66547" cy:directed="1"/>
      <edge id="78765" label="USF1 (GRN) RABIF" source="67230" target="67000" cy:directed="1"/>
      <edge id="78764" label="USF1 (GRN) MYD88" source="67230" target="66632" cy:directed="1"/>
      <edge id="78763" label="USF1 (GRN) ATP5G3" source="67230" target="66543" cy:directed="1"/>
      <edge id="78762" label="USF1 (GRN) MRPL15" source="67230" target="66626" cy:directed="1"/>
      <edge id="78761" label="USF1 (GRN) SPRYD7" source="67230" target="66883" cy:directed="1"/>
      <edge id="78760" label="USF1 (GRN) FASN" source="67230" target="67205" cy:directed="1"/>
      <edge id="78759" label="USF1 (GRN) PRDX4" source="67230" target="66491" cy:directed="1"/>
      <edge id="78758" label="USF1 (GRN) UMPS" source="67230" target="66617" cy:directed="1"/>
      <edge id="78757" label="USF1 (GRN) GHITM" source="67230" target="67081" cy:directed="1"/>
      <edge id="78756" label="USF1 (GRN) DHDDS" source="67230" target="66916" cy:directed="1"/>
      <edge id="78755" label="USF1 (GRN) SLC5A6" source="67230" target="66625" cy:directed="1"/>
      <edge id="78754" label="USF1 (GRN) GNPDA1" source="67230" target="66639" cy:directed="1"/>
      <edge id="78753" label="USF1 (GRN) SFXN2" source="67230" target="66993" cy:directed="1"/>
      <edge id="78752" label="USF1 (GRN) MRPS16" source="67230" target="67239" cy:directed="1"/>
      <edge id="78751" label="USF1 (GRN) CENPH" source="67230" target="66539" cy:directed="1"/>
      <edge id="78750" label="USF1 (GRN) CLN6" source="67230" target="66544" cy:directed="1"/>
      <edge id="78749" label="USF1 (GRN) CSTF2" source="67230" target="66556" cy:directed="1"/>
      <edge id="78748" label="USF1 (GRN) CNP" source="67230" target="67080" cy:directed="1"/>
      <edge id="78747" label="USF1 (GRN) NAT10" source="67230" target="66602" cy:directed="1"/>
      <edge id="78746" label="USF1 (GRN) FUT3" source="67230" target="66600" cy:directed="1"/>
      <edge id="78745" label="USF1 (GRN) WDR12" source="67230" target="66474" cy:directed="1"/>
      <edge id="78744" label="USF1 (GRN) METTL13" source="67230" target="66593" cy:directed="1"/>
      <edge id="78743" label="USF1 (GRN) BRI3BP" source="67230" target="66995" cy:directed="1"/>
      <edge id="78742" label="USF1 (GRN) KCNJ15" source="67230" target="66589" cy:directed="1"/>
      <edge id="78741" label="USF1 (GRN) TXNDC17" source="67230" target="67097" cy:directed="1"/>
      <edge id="78740" label="USF1 (GRN) ARL11" source="67230" target="67238" cy:directed="1"/>
      <edge id="78739" label="USF1 (GRN) HYLS1" source="67230" target="66582" cy:directed="1"/>
      <edge id="78738" label="USF1 (GRN) NECAB1" source="67230" target="66581" cy:directed="1"/>
      <edge id="78737" label="USF1 (GRN) C1orf85" source="67230" target="66579" cy:directed="1"/>
      <edge id="78736" label="USF1 (GRN) S1PR4" source="67230" target="66499" cy:directed="1"/>
      <edge id="78735" label="USF1 (GRN) COQ9" source="67230" target="66576" cy:directed="1"/>
      <edge id="78734" label="USF1 (GRN) IDH2" source="67230" target="67135" cy:directed="1"/>
      <edge id="78733" label="USF1 (GRN) TSPYL5" source="67230" target="67237" cy:directed="1"/>
      <edge id="78732" label="USF1 (GRN) PARK7" source="67230" target="66889" cy:directed="1"/>
      <edge id="78731" label="USF1 (GRN) SLC39A11" source="67230" target="67078" cy:directed="1"/>
      <edge id="78730" label="USF1 (GRN) SCIMP" source="67230" target="67099" cy:directed="1"/>
      <edge id="78729" label="USF1 (GRN) CPSF3" source="67230" target="66575" cy:directed="1"/>
      <edge id="78728" label="USF1 (GRN) MND1" source="67230" target="66493" cy:directed="1"/>
      <edge id="78727" label="USF1 (GRN) ILDR1" source="67230" target="66559" cy:directed="1"/>
      <edge id="78726" label="USF1 (GRN) RER1" source="67230" target="66558" cy:directed="1"/>
      <edge id="78725" label="USF1 (GRN) POLR2C" source="67230" target="66527" cy:directed="1"/>
      <edge id="78724" label="USF1 (GRN) NIPSNAP1" source="67230" target="66986" cy:directed="1"/>
      <edge id="78723" label="USF1 (GRN) SRD5A3" source="67230" target="66591" cy:directed="1"/>
      <edge id="78722" label="USF1 (GRN) CD300LF" source="67230" target="66552" cy:directed="1"/>
      <edge id="78721" label="USF1 (GRN) CD33" source="67230" target="66550" cy:directed="1"/>
      <edge id="78720" label="USF1 (GRN) DPP3" source="67230" target="66523" cy:directed="1"/>
      <edge id="78719" label="USF1 (GRN) GALE" source="67230" target="67236" cy:directed="1"/>
      <edge id="78718" label="USF1 (GRN) NSDHL" source="67230" target="66908" cy:directed="1"/>
      <edge id="78717" label="USF1 (GRN) FZD5" source="67230" target="67201" cy:directed="1"/>
      <edge id="78716" label="USF1 (GRN) DFFA" source="67230" target="67235" cy:directed="1"/>
      <edge id="78715" label="USF1 (GRN) SLC31A2" source="67230" target="67199" cy:directed="1"/>
      <edge id="78714" label="USF1 (GRN) MACROD2" source="67230" target="66598" cy:directed="1"/>
      <edge id="78713" label="USF1 (GRN) TMEM69" source="67230" target="66536" cy:directed="1"/>
      <edge id="78712" label="USF1 (GRN) TFAP2C" source="67230" target="67172" cy:directed="1"/>
      <edge id="78711" label="USF1 (GRN) DAP3" source="67230" target="66538" cy:directed="1"/>
      <edge id="78710" label="USF1 (GRN) MED8" source="67230" target="67103" cy:directed="1"/>
      <edge id="78709" label="USF1 (GRN) TTPAL" source="67230" target="66906" cy:directed="1"/>
      <edge id="78708" label="USF1 (GRN) TUBA1C" source="67230" target="67109" cy:directed="1"/>
      <edge id="78707" label="USF1 (GRN) SFXN4" source="67230" target="66528" cy:directed="1"/>
      <edge id="78706" label="USF1 (GRN) ALOX15B" source="67230" target="67198" cy:directed="1"/>
      <edge id="78705" label="USF1 (GRN) CHMP4C" source="67230" target="66526" cy:directed="1"/>
      <edge id="78704" label="USF1 (GRN) C1orf172" source="67230" target="67197" cy:directed="1"/>
      <edge id="78703" label="USF1 (GRN) COPZ1" source="67230" target="66525" cy:directed="1"/>
      <edge id="78702" label="USF1 (GRN) SLC35C1" source="67230" target="66586" cy:directed="1"/>
      <edge id="78701" label="USF1 (GRN) ACAT1" source="67230" target="66862" cy:directed="1"/>
      <edge id="78700" label="USF1 (GRN) MBIP" source="67230" target="67196" cy:directed="1"/>
      <edge id="78699" label="USF1 (GRN) CAPN3" source="67230" target="66524" cy:directed="1"/>
      <edge id="78698" label="USF1 (GRN) HYOU1" source="67230" target="66522" cy:directed="1"/>
      <edge id="78697" label="USF1 (GRN) ALPL" source="67230" target="67136" cy:directed="1"/>
      <edge id="78696" label="USF1 (GRN) PDIA6" source="67230" target="67120" cy:directed="1"/>
      <edge id="78695" label="USF1 (GRN) GRHL2" source="67230" target="67234" cy:directed="1"/>
      <edge id="78694" label="USF1 (GRN) GPR34" source="67230" target="66520" cy:directed="1"/>
      <edge id="78693" label="USF1 (GRN) TMEM116" source="67230" target="66517" cy:directed="1"/>
      <edge id="78692" label="USF1 (GRN) FAM64A" source="67230" target="66516" cy:directed="1"/>
      <edge id="78691" label="USF1 (GRN) RFC4" source="67230" target="67233" cy:directed="1"/>
      <edge id="78690" label="USF1 (GRN) POC1A" source="67230" target="67232" cy:directed="1"/>
      <edge id="78689" label="USF1 (GRN) BCAT2" source="67230" target="67195" cy:directed="1"/>
      <edge id="78688" label="USF1 (GRN) FICD" source="67230" target="66894" cy:directed="1"/>
      <edge id="78687" label="USF1 (GRN) GSTA4" source="67230" target="66512" cy:directed="1"/>
      <edge id="78686" label="USF1 (GRN) FEN1" source="67230" target="67098" cy:directed="1"/>
      <edge id="78685" label="USF1 (GRN) CPM" source="67230" target="67133" cy:directed="1"/>
      <edge id="78684" label="USF1 (GRN) TRAIP" source="67230" target="66505" cy:directed="1"/>
      <edge id="78683" label="USF1 (GRN) USP44" source="67230" target="67193" cy:directed="1"/>
      <edge id="78682" label="USF1 (GRN) PSAT1" source="67230" target="66978" cy:directed="1"/>
      <edge id="78681" label="USF1 (GRN) ANKEF1" source="67230" target="66498" cy:directed="1"/>
      <edge id="78680" label="USF1 (GRN) RNASE6" source="67230" target="66488" cy:directed="1"/>
      <edge id="78679" label="USF1 (GRN) AIFM1" source="67230" target="66469" cy:directed="1"/>
      <edge id="78678" label="USF1 (GRN) DRAM1" source="67230" target="66490" cy:directed="1"/>
      <edge id="78677" label="USF1 (GRN) TLCD1" source="67230" target="67130" cy:directed="1"/>
      <edge id="78676" label="USF1 (GRN) ALG3" source="67230" target="66476" cy:directed="1"/>
      <edge id="78675" label="USF1 (GRN) SLC38A7" source="67230" target="66487" cy:directed="1"/>
      <edge id="78674" label="USF1 (GRN) MIS18A" source="67230" target="66480" cy:directed="1"/>
      <edge id="78673" label="USF1 (GRN) SLC7A7" source="67230" target="66683" cy:directed="1"/>
      <edge id="78672" label="USF1 (GRN) RAN" source="67230" target="66712" cy:directed="1"/>
      <edge id="78671" label="USF1 (GRN) RAD51" source="67230" target="66972" cy:directed="1"/>
      <edge id="78670" label="USF1 (GRN) TSPAN3" source="67230" target="66900" cy:directed="1"/>
      <edge id="78669" label="USF1 (GRN) SHMT2" source="67230" target="66973" cy:directed="1"/>
      <edge id="78668" label="USF1 (GRN) C2" source="67230" target="66509" cy:directed="1"/>
      <edge id="78667" label="USF1 (GRN) PXMP4" source="67230" target="66857" cy:directed="1"/>
      <edge id="78666" label="USF1 (GRN) ABCC6" source="67230" target="67128" cy:directed="1"/>
      <edge id="78665" label="USF1 (GRN) RPS6KA2" source="67230" target="67127" cy:directed="1"/>
      <edge id="78664" label="USF1 (GRN) OIP5" source="67230" target="66470" cy:directed="1"/>
      <edge id="78663" label="USF1 (GRN) TFCP2L1" source="67230" target="67188" cy:directed="1"/>
      <edge id="78662" label="USF1 (GRN) LAMP3" source="67230" target="67126" cy:directed="1"/>
      <edge id="78661" label="USF1 (GRN) EPDR1" source="67230" target="66466" cy:directed="1"/>
      <edge id="78660" label="USF1 (GRN) TMEM164" source="67230" target="66994" cy:directed="1"/>
      <edge id="78659" label="USF1 (GRN) SKA3" source="67230" target="66467" cy:directed="1"/>
      <edge id="78658" label="USF1 (GRN) PLA2G4F" source="67230" target="66436" cy:directed="1"/>
      <edge id="78657" label="USF1 (GRN) KIAA0101" source="67230" target="66461" cy:directed="1"/>
      <edge id="78656" label="USF1 (GRN) ALG1" source="67230" target="66441" cy:directed="1"/>
      <edge id="78655" label="USF1 (GRN) PLK1" source="67230" target="67231" cy:directed="1"/>
      <edge id="78654" label="USF1 (GRN) TMEM41A" source="67230" target="66511" cy:directed="1"/>
      <edge id="78653" label="USF1 (GRN) ACOXL" source="67230" target="67186" cy:directed="1"/>
      <edge id="78652" label="USF1 (GRN) LYRM2" source="67230" target="66457" cy:directed="1"/>
      <edge id="78651" label="USF1 (GRN) SNX30" source="67230" target="66853" cy:directed="1"/>
      <edge id="78650" label="USF1 (GRN) FITM2" source="67230" target="66453" cy:directed="1"/>
      <edge id="78649" label="USF1 (GRN) MRPL3" source="67230" target="66465" cy:directed="1"/>
      <edge id="78648" label="USF1 (GRN) TIMELESS" source="67230" target="66451" cy:directed="1"/>
      <edge id="78647" label="USF1 (GRN) MPDU1" source="67230" target="66449" cy:directed="1"/>
      <edge id="78646" label="USF1 (GRN) AURKA" source="67230" target="66969" cy:directed="1"/>
      <edge id="78645" label="USF1 (GRN) VSIG4" source="67230" target="66445" cy:directed="1"/>
      <edge id="78644" label="USF1 (GRN) CCNB1" source="67230" target="66439" cy:directed="1"/>
      <edge id="78643" label="USF1 (GRN) TMEM163" source="67230" target="66450" cy:directed="1"/>
      <edge id="78642" label="USF1 (GRN) SNX25" source="67230" target="66437" cy:directed="1"/>
      <edge id="78641" label="USF1 (GRN) TFB2M" source="67230" target="66456" cy:directed="1"/>
      <edge id="78640" label="USF1 (GRN) CCT5" source="67230" target="66957" cy:directed="1"/>
      <edge id="78639" label="USF1 (GRN) CCT3" source="67230" target="66440" cy:directed="1"/>
      <edge id="78638" label="USF1 (GRN) FMO5" source="67230" target="66434" cy:directed="1"/>
      <edge id="78637" label="SREBF2 (GRN) TTPAL" source="67229" target="66906" cy:directed="1"/>
      <edge id="78636" label="SREBF2 (GRN) HADH" source="67229" target="67576" cy:directed="1"/>
      <edge id="78635" label="SREBF2 (GRN) NDUFAF1" source="67229" target="67083" cy:directed="1"/>
      <edge id="78634" label="SREBF2 (GRN) MACROD2" source="67229" target="66598" cy:directed="1"/>
      <edge id="78633" label="SREBF2 (GRN) MRPS23" source="67229" target="66738" cy:directed="1"/>
      <edge id="78632" label="SREBF2 (GRN) CDKL2" source="67229" target="67482" cy:directed="1"/>
      <edge id="78631" label="SREBF2 (GRN) POLR2C" source="67229" target="66527" cy:directed="1"/>
      <edge id="78630" label="SREBF2 (GRN) PARN" source="67229" target="67495" cy:directed="1"/>
      <edge id="78629" label="SREBF2 (GRN) GALNT10" source="67229" target="67248" cy:directed="1"/>
      <edge id="78628" label="SREBF2 (GRN) C19orf59" source="67229" target="66732" cy:directed="1"/>
      <edge id="78627" label="SREBF2 (GRN) PARM1" source="67229" target="67478" cy:directed="1"/>
      <edge id="78626" label="SREBF2 (GRN) FGFR2" source="67229" target="67189" cy:directed="1"/>
      <edge id="78625" label="SREBF2 (GRN) MCM2" source="67229" target="66444" cy:directed="1"/>
      <edge id="78624" label="SREBF2 (GRN) CPSF3" source="67229" target="66575" cy:directed="1"/>
      <edge id="78623" label="SREBF2 (GRN) NECAB1" source="67229" target="66581" cy:directed="1"/>
      <edge id="78622" label="SREBF2 (GRN) TLCD1" source="67229" target="67130" cy:directed="1"/>
      <edge id="78621" label="SREBF2 (GRN) MRPL3" source="67229" target="66465" cy:directed="1"/>
      <edge id="78620" label="SREBF2 (GRN) ALOX5AP" source="67229" target="66855" cy:directed="1"/>
      <edge id="78619" label="SREBF2 (GRN) TSPAN3" source="67229" target="66900" cy:directed="1"/>
      <edge id="78618" label="SREBF2 (GRN) SNX25" source="67229" target="66437" cy:directed="1"/>
      <edge id="78617" label="SREBF2 (GRN) LRRK2" source="67229" target="66454" cy:directed="1"/>
      <edge id="78616" label="SREBF2 (GRN) LYRM2" source="67229" target="66457" cy:directed="1"/>
      <edge id="78615" label="UQCRQ (GCN) PYCR1" source="67228" target="66561" cy:directed="1"/>
      <edge id="78614" label="UQCRQ (GCN) HMMR" source="67228" target="66452" cy:directed="1"/>
      <edge id="78613" label="SPDL1 (GCN) SAPCD2" source="67227" target="66447" cy:directed="1"/>
[truncated: 1,034,427 more chars]
