# Supplementary material
Source: publisher figshare collection journal article supplement (https://springernature.figshare.com/ndownloader/files/35041376)
Supplement: Supplementary file 1 [file 35041376 › CytoscapeSession-2021_06_28-02_05/networks/82099-lung_GRN4TCGA_LUAD.txt_2.xgmml]

<?xml version="1.0" encoding="UTF-8" standalone="yes"?>
<graph id="82099" label="lung_GRN4TCGA_LUAD.txt_2" cy:view="0" cy:registered="0" cy:documentVersion="3.0" xmlns:dc="http://purl.org/dc/elements/1.1/" xmlns:xlink="http://www.w3.org/1999/xlink" xmlns:rdf="http://www.w3.org/1999/02/22-rdf-syntax-ns#" xmlns:cy="http://www.cytoscape.org" xmlns="http://www.cs.rpi.edu/XGMML">
  <att>
    <graph id="82115" label="82115" cy:registered="0">
    </graph>
  </att>
  <att>
    <graph id="82125" label="lung_GRN4TCGA_LUAD.txt_2" cy:registered="1">
      <node id="82159" label="ARID2"/>
      <node id="82158" label="TNS4"/>
      <node id="82157" label="SMKR1"/>
      <node id="82156" label="ELK4"/>
      <node id="82155" label="DUOX1"/>
      <node id="82154" label="C16orf59"/>
      <node id="82153" label="ZWINT"/>
      <node id="82152" label="SYNE4"/>
      <node id="82151" label="ETV1"/>
      <node id="82150" label="LIMS2"/>
      <node id="82149" label="ILVBL"/>
      <node id="82148" label="ETV4"/>
      <node id="82147" label="ABCC5"/>
      <node id="82146" label="ETV6"/>
      <node id="82145" label="H2AFY2"/>
      <node id="82144" label="ACVRL1"/>
      <node id="82143" label="GABPA"/>
      <node id="82142" label="MXI1"/>
      <node id="82141" label="NR2F6"/>
      <node id="82140" label="KIF20A"/>
      <node id="82139" label="ZNF572"/>
      <node id="82138" label="RFX2"/>
      <node id="82137" label="RFX3"/>
      <node id="82136" label="RFX4"/>
      <node id="82135" label="USF1"/>
      <edge id="82197" label="ARID2 (GRN) TNS4" source="82159" target="82158" cy:directed="1"/>
      <edge id="82196" label="ARID2 (GRN) SMKR1" source="82159" target="82157" cy:directed="1"/>
      <edge id="82195" label="TNS4 (GCN) SMKR1" source="82158" target="82157" cy:directed="1"/>
      <edge id="82194" label="ELK4 (GRN) DUOX1" source="82156" target="82155" cy:directed="1"/>
      <edge id="82193" label="ELK4 (GRN) C16orf59" source="82156" target="82154" cy:directed="1"/>
      <edge id="82192" label="ELK4 (GRN) ZWINT" source="82156" target="82153" cy:directed="1"/>
      <edge id="82191" label="ELK4 (GRN) SYNE4" source="82156" target="82152" cy:directed="1"/>
      <edge id="82190" label="DUOX1 (GCN) ZWINT" source="82155" target="82153" cy:directed="1"/>
      <edge id="82189" label="C16orf59 (GCN) SYNE4" source="82154" target="82152" cy:directed="1"/>
      <edge id="82188" label="ETV1 (GRN) LIMS2" source="82151" target="82150" cy:directed="1"/>
      <edge id="82187" label="ETV1 (GRN) ILVBL" source="82151" target="82149" cy:directed="1"/>
      <edge id="82186" label="LIMS2 (GCN) ILVBL" source="82150" target="82149" cy:directed="1"/>
      <edge id="82185" label="LIMS2 (GCN) ABCC5" source="82150" target="82147" cy:directed="1"/>
      <edge id="82184" label="ETV4 (GRN) LIMS2" source="82148" target="82150" cy:directed="1"/>
      <edge id="82183" label="ETV4 (GRN) ABCC5" source="82148" target="82147" cy:directed="1"/>
      <edge id="82182" label="ETV4 (GRN) ILVBL" source="82148" target="82149" cy:directed="1"/>
      <edge id="82181" label="ETV6 (GRN) LIMS2" source="82146" target="82150" cy:directed="1"/>
      <edge id="82180" label="ETV6 (GRN) H2AFY2" source="82146" target="82145" cy:directed="1"/>
      <edge id="82179" label="ETV6 (GRN) ILVBL" source="82146" target="82149" cy:directed="1"/>
      <edge id="82178" label="ETV6 (GRN) ACVRL1" source="82146" target="82144" cy:directed="1"/>
      <edge id="82177" label="H2AFY2 (GCN) ACVRL1" source="82145" target="82144" cy:directed="1"/>
      <edge id="82176" label="GABPA (GRN) LIMS2" source="82143" target="82150" cy:directed="1"/>
      <edge id="82175" label="GABPA (GRN) C16orf59" source="82143" target="82154" cy:directed="1"/>
      <edge id="82174" label="GABPA (GRN) ILVBL" source="82143" target="82149" cy:directed="1"/>
      <edge id="82173" label="GABPA (GRN) SYNE4" source="82143" target="82152" cy:directed="1"/>
      <edge id="82172" label="MXI1 (GRN) TNS4" source="82142" target="82158" cy:directed="1"/>
      <edge id="82171" label="MXI1 (GRN) SMKR1" source="82142" target="82157" cy:directed="1"/>
      <edge id="82170" label="NR2F6 (GRN) KIF20A" source="82141" target="82140" cy:directed="1"/>
      <edge id="82169" label="NR2F6 (GRN) ZNF572" source="82141" target="82139" cy:directed="1"/>
      <edge id="82168" label="KIF20A (GCN) ZNF572" source="82140" target="82139" cy:directed="1"/>
      <edge id="82167" label="RFX2 (GRN) TNS4" source="82138" target="82158" cy:directed="1"/>
      <edge id="82166" label="RFX2 (GRN) SMKR1" source="82138" target="82157" cy:directed="1"/>
      <edge id="82165" label="RFX3 (GRN) TNS4" source="82137" target="82158" cy:directed="1"/>
      <edge id="82164" label="RFX3 (GRN) SMKR1" source="82137" target="82157" cy:directed="1"/>
      <edge id="82163" label="RFX4 (GRN) TNS4" source="82136" target="82158" cy:directed="1"/>
      <edge id="82162" label="RFX4 (GRN) SMKR1" source="82136" target="82157" cy:directed="1"/>
      <edge id="82161" label="USF1 (GRN) DUOX1" source="82135" target="82155" cy:directed="1"/>
      <edge id="82160" label="USF1 (GRN) ZWINT" source="82135" target="82153" cy:directed="1"/>
    </graph>
  </att>
</graph>
