# Supplementary material
Source: publisher figshare collection journal article supplement (https://springernature.figshare.com/ndownloader/files/35041376)
Supplement: Supplementary file 1 [file 35041376 › CytoscapeSession-2021_06_28-02_05/networks/82198-lung_GRN4TCGA_LUSC.txt_2.xgmml]

<?xml version="1.0" encoding="UTF-8" standalone="yes"?>
<graph id="82198" label="lung_GRN4TCGA_LUSC.txt_2" cy:view="0" cy:registered="0" cy:documentVersion="3.0" xmlns:dc="http://purl.org/dc/elements/1.1/" xmlns:xlink="http://www.w3.org/1999/xlink" xmlns:rdf="http://www.w3.org/1999/02/22-rdf-syntax-ns#" xmlns:cy="http://www.cytoscape.org" xmlns="http://www.cs.rpi.edu/XGMML">
  <att>
    <graph id="82214" label="82214" cy:registered="0">
    </graph>
  </att>
  <att>
    <graph id="82224" label="lung_GRN4TCGA_LUSC.txt_2" cy:registered="1">
      <node id="82487" label="MXI1"/>
      <node id="82486" label="CYP4F11"/>
      <node id="82485" label="AKR1B10"/>
      <node id="82484" label="GPX2"/>
      <node id="82483" label="C1orf192"/>
      <node id="82482" label="SOX2"/>
      <node id="82481" label="GSTA1"/>
      <node id="82480" label="STK33"/>
      <node id="82479" label="TP63"/>
      <node id="82478" label="NRF1"/>
      <node id="82477" label="LRRC25"/>
      <node id="82476" label="TOR4A"/>
      <node id="82475" label="ALDH3B1"/>
      <node id="82474" label="CCR1"/>
      <node id="82473" label="VWF"/>
      <node id="82472" label="ITGB2"/>
      <node id="82471" label="CDC45"/>
      <node id="82470" label="CD97"/>
      <node id="82469" label="CAPN8"/>
      <node id="82468" label="TGFBR2"/>
      <node id="82467" label="SFTA3"/>
      <node id="82466" label="SHE"/>
      <node id="82465" label="MYO1F"/>
      <node id="82464" label="SMARCB1"/>
      <node id="82463" label="TRIP13"/>
      <node id="82462" label="PSMC5"/>
      <node id="82461" label="UNC13D"/>
      <node id="82460" label="AUNIP"/>
      <node id="82459" label="POLDIP2"/>
      <node id="82458" label="ARHGAP30"/>
      <node id="82457" label="MCM5"/>
      <node id="82456" label="CORO1A"/>
      <node id="82455" label="ETV4"/>
      <node id="82454" label="LIMS2"/>
      <node id="82453" label="INMT"/>
      <node id="82452" label="LPCAT1"/>
      <node id="82451" label="ELF1"/>
      <node id="82450" label="ZNF320"/>
      <node id="82449" label="SMARCC2"/>
      <node id="82448" label="CENPO"/>
      <node id="82447" label="DNAJC19"/>
      <node id="82446" label="BRCA1"/>
      <node id="82445" label="NLRP9"/>
      <node id="82444" label="SLC22A31"/>
      <node id="82443" label="RHOBTB2"/>
      <node id="82442" label="ELF4"/>
      <node id="82441" label="MC4R"/>
      <node id="82440" label="WNT5A"/>
      <node id="82439" label="TRIM16L"/>
      <node id="82438" label="KNSTRN"/>
      <node id="82437" label="ETV3"/>
      <node id="82436" label="SFTA2"/>
      <node id="82435" label="NKX2-1"/>
      <node id="82434" label="ETV6"/>
      <node id="82433" label="SFTPD"/>
      <node id="82432" label="ST3GAL5"/>
      <node id="82431" label="DTD2"/>
      <node id="82430" label="SLC39A8"/>
      <node id="82429" label="H2AFY2"/>
      <node id="82428" label="GABPA"/>
      <node id="82427" label="OIP5"/>
      <node id="82426" label="TIMELESS"/>
      <node id="82425" label="ADAL"/>
      <node id="82424" label="FOXM1"/>
      <node id="82423" label="RFC5"/>
      <node id="82422" label="TROAP"/>
      <node id="82421" label="TMEM45B"/>
      <node id="82420" label="MVP"/>
      <node id="82419" label="CDCA5"/>
      <node id="82418" label="PIK3R6"/>
      <node id="82417" label="SPC25"/>
      <node id="82416" label="COX5A"/>
      <node id="82415" label="RNASEH2A"/>
      <node id="82414" label="YEATS4"/>
      <node id="82413" label="RAD51"/>
      <node id="82412" label="C15orf40"/>
      <node id="82411" label="SKP2"/>
      <node id="82410" label="TRAIP"/>
      <node id="82409" label="NR2F6"/>
      <node id="82408" label="PSMA4"/>
      <node id="82407" label="SIX5"/>
      <node id="82406" label="TOPORS"/>
      <node id="82405" label="PITX2"/>
      <node id="82404" label="C2orf44"/>
      <node id="82403" label="NABP2"/>
      <node id="82402" label="ARNTL"/>
      <node id="82401" label="DDIT3"/>
      <node id="82400" label="ELK4"/>
      <node id="82399" label="RAE1"/>
      <node id="82398" label="ERF"/>
      <node id="82397" label="KLF5"/>
      <node id="82396" label="MLX"/>
      <node id="82395" label="SREBF2"/>
      <node id="82394" label="USF1"/>
      <node id="82393" label="RFC4"/>
      <node id="82392" label="USF2"/>
      <node id="82391" label="ELF5"/>
      <node id="82390" label="KCNQ3"/>
      <node id="82389" label="TFEB"/>
      <node id="82388" label="EHF"/>
      <node id="82387" label="ELF3"/>
      <node id="82386" label="ETV1"/>
      <node id="82385" label="RFX1"/>
      <node id="82384" label="TGM3"/>
      <node id="82383" label="RFX2"/>
      <node id="82382" label="SFTPA2"/>
      <node id="82381" label="RFX3"/>
      <node id="82380" label="RFX4"/>
      <node id="82379" label="EOMES"/>
      <node id="82378" label="RFX5"/>
      <node id="82377" label="ARID2"/>
      <node id="82376" label="ZBTB33"/>
      <node id="82375" label="CFB"/>
      <node id="82374" label="JUN"/>
      <node id="82373" label="TSPY8"/>
      <node id="82372" label="UCP1"/>
      <node id="82371" label="CDH12"/>
      <node id="82370" label="NR2F2"/>
      <node id="82369" label="EGR4"/>
      <node id="82368" label="EP300"/>
      <node id="82367" label="MYPOP"/>
      <node id="82366" label="NFYC"/>
      <node id="82365" label="TFAP2A"/>
      <node id="82364" label="TFAP2C"/>
      <node id="82363" label="ARNT"/>
      <node id="82362" label="AR"/>
      <node id="82361" label="YBX1"/>
      <node id="82360" label="NR0B1"/>
      <node id="82359" label="HSF1"/>
      <node id="82358" label="LMO2"/>
      <node id="82357" label="TFAP2B"/>
      <node id="82356" label="BHLHE40"/>
      <node id="82355" label="GSC2"/>
      <node id="82354" label="MYBL1"/>
      <node id="82353" label="ZBED1"/>
      <node id="82352" label="E2F1"/>
      <node id="82351" label="PAX1"/>
      <node id="82350" label="TFCP2L1"/>
      <node id="82349" label="SCRT1"/>
      <node id="82348" label="CLOCK"/>
      <node id="82347" label="CTCF"/>
      <node id="82346" label="MYOD1"/>
      <node id="82345" label="ZBTB7C"/>
      <node id="82344" label="REST"/>
      <node id="82343" label="MZF1"/>
      <node id="82342" label="KLF4"/>
      <node id="82341" label="HIVEP2"/>
      <node id="82340" label="GLIS3"/>
      <node id="82339" label="KLF3"/>
      <node id="82338" label="KLF8"/>
      <node id="82337" label="RBPJ"/>
      <node id="82336" label="TP73"/>
      <node id="82335" label="GLIS2"/>
      <node id="82334" label="EGR2"/>
      <node id="82333" label="ELK1"/>
      <node id="82332" label="RUNX3"/>
      <node id="82331" label="ID4"/>
      <node id="82330" label="KLF1"/>
      <node id="82329" label="NR5A2"/>
      <node id="82328" label="SMAD2"/>
      <node id="82327" label="SREBF1"/>
      <node id="82326" label="ZIC4"/>
      <node id="82325" label="ENO1"/>
      <node id="82324" label="ARNT2"/>
      <node id="82323" label="HAND2"/>
      <node id="82322" label="ESRRA"/>
      <node id="82321" label="GMEB2"/>
      <node id="82320" label="HIF1A"/>
      <node id="82319" label="NFIX"/>
      <node id="82318" label="ZBTB7A"/>
      <node id="82317" label="ZHX1"/>
      <node id="82316" label="FOXK1"/>
      <node id="82315" label="TP53"/>
      <node id="82314" label="ATOH8"/>
      <node id="82313" label="BHLHE41"/>
      <node id="82312" label="MLXIPL"/>
      <node id="82311" label="HIC2"/>
      <node id="82310" label="ZIC1"/>
      <node id="82309" label="ASCL1"/>
      <node id="82308" label="ZBTB4"/>
      <node id="82307" label="ZNF202"/>
      <node id="82306" label="PROX1"/>
      <node id="82305" label="GLIS1"/>
      <node id="82304" label="ETV2"/>
      <node id="82303" label="AKR1C1"/>
      <node id="82302" label="KIAA0319"/>
      <node id="82301" label="IQCG"/>
      <node id="82300" label="ABCC5"/>
      <node id="82299" label="ALDH3A1"/>
      <node id="82298" label="ACVRL1"/>
      <node id="82297" label="FGR"/>
      <node id="82296" label="SIGLEC9"/>
      <node id="82295" label="ZNF74"/>
      <node id="82294" label="TMEM100"/>
      <node id="82293" label="SNRPD3"/>
      <node id="82292" label="SLAMF8"/>
      <node id="82291" label="HHIP"/>
      <node id="82290" label="PES1"/>
      <node id="82289" label="DPEP2"/>
      <node id="82288" label="ARHGDIB"/>
      <node id="82287" label="NDUFS6"/>
      <node id="82286" label="GALNT10"/>
      <node id="82285" label="ASAH1"/>
      <node id="82284" label="TOMM22"/>
      <node id="82283" label="CD180"/>
      <node id="82282" label="DRG1"/>
      <node id="82281" label="MND1"/>
      <node id="82280" label="PCNA"/>
      <node id="82279" label="HCLS1"/>
      <node id="82278" label="CPM"/>
      <node id="82277" label="STEAP4"/>
      <node id="82276" label="MFNG"/>
      <node id="82275" label="TNS3"/>
      <node id="82274" label="POP5"/>
      <node id="82273" label="MRPL36"/>
      <node id="82272" label="EIF4G1"/>
      <node id="82271" label="C11orf82"/>
      <node id="82270" label="SFTPB"/>
      <node id="82269" label="C1orf162"/>
      <node id="82268" label="C1QBP"/>
      <node id="82267" label="FGA"/>
      <node id="82266" label="THEMIS2"/>
      <node id="82265" label="CCDC69"/>
      <node id="82264" label="VCP"/>
      <node id="82263" label="ARRB1"/>
      <node id="82262" label="MBIP"/>
      <node id="82261" label="ZWINT"/>
      <node id="82260" label="RPUSD2"/>
      <node id="82259" label="NFAM1"/>
      <node id="82258" label="TMEM79"/>
      <node id="82257" label="GINS2"/>
      <node id="82256" label="PRIM1"/>
      <node id="82255" label="GINS1"/>
      <node id="82254" label="LIN9"/>
      <node id="82253" label="SUV39H1"/>
      <node id="82252" label="PTPLAD1"/>
      <node id="82251" label="VWA9"/>
      <node id="82250" label="PSAT1"/>
      <node id="82249" label="DSCC1"/>
      <node id="82248" label="POLR3K"/>
      <node id="82247" label="FAM103A1"/>
      <node id="82246" label="GTF2A2"/>
      <node id="82245" label="MRPL46"/>
      <node id="82244" label="TIPIN"/>
      <node id="82243" label="COQ3"/>
      <node id="82242" label="ACAT2"/>
      <node id="82241" label="MTFMT"/>
      <node id="82240" label="NECAB1"/>
      <node id="82239" label="AKAP14"/>
      <node id="82238" label="C11orf53"/>
      <node id="82237" label="TSPY6P"/>
      <node id="82236" label="HOXB1"/>
      <node id="82235" label="CYP4F2"/>
      <node id="82234" label="KIAA0408"/>
      <edge id="83273" label="MXI1 (GRN) CYP4F11" source="82487" target="82486" cy:directed="1"/>
      <edge id="83272" label="MXI1 (GRN) AKR1B10" source="82487" target="82485" cy:directed="1"/>
      <edge id="83271" label="MXI1 (GRN) GPX2" source="82487" target="82484" cy:directed="1"/>
      <edge id="83270" label="MXI1 (GRN) C1orf192" source="82487" target="82483" cy:directed="1"/>
      <edge id="83269" label="MXI1 (GRN) SOX2" source="82487" target="82482" cy:directed="1"/>
      <edge id="83268" label="MXI1 (GRN) GSTA1" source="82487" target="82481" cy:directed="1"/>
      <edge id="83267" label="MXI1 (GRN) STK33" source="82487" target="82480" cy:directed="1"/>
      <edge id="83266" label="MXI1 (GRN) TP63" source="82487" target="82479" cy:directed="1"/>
      <edge id="83265" label="MXI1 (GRN) AKR1C1" source="82487" target="82303" cy:directed="1"/>
      <edge id="83264" label="MXI1 (GRN) KIAA0319" source="82487" target="82302" cy:directed="1"/>
      <edge id="83263" label="MXI1 (GRN) IQCG" source="82487" target="82301" cy:directed="1"/>
      <edge id="83262" label="MXI1 (GRN) ABCC5" source="82487" target="82300" cy:directed="1"/>
      <edge id="83261" label="MXI1 (GRN) ALDH3A1" source="82487" target="82299" cy:directed="1"/>
      <edge id="83260" label="CYP4F11 (GCN) AKR1B10" source="82486" target="82485" cy:directed="1"/>
      <edge id="83259" label="AKR1B10 (GCN) AKR1C1" source="82485" target="82303" cy:directed="1"/>
      <edge id="83258" label="GPX2 (GCN) KIAA0319" source="82484" target="82302" cy:directed="1"/>
      <edge id="83257" label="C1orf192 (GCN) IQCG" source="82483" target="82301" cy:directed="1"/>
      <edge id="83256" label="SOX2 (GCN) TP63" source="82482" target="82479" cy:directed="1"/>
      <edge id="83255" label="GSTA1 (GCN) TP63" source="82481" target="82479" cy:directed="1"/>
      <edge id="83254" label="STK33 (GCN) ABCC5" source="82480" target="82300" cy:directed="1"/>
      <edge id="83253" label="TP63 (GCN) ALDH3A1" source="82479" target="82299" cy:directed="1"/>
      <edge id="83252" label="NRF1 (GRN) LRRC25" source="82478" target="82477" cy:directed="1"/>
      <edge id="83251" label="NRF1 (GRN) TOR4A" source="82478" target="82476" cy:directed="1"/>
      <edge id="83250" label="NRF1 (GRN) ALDH3B1" source="82478" target="82475" cy:directed="1"/>
      <edge id="83249" label="NRF1 (GRN) CCR1" source="82478" target="82474" cy:directed="1"/>
      <edge id="83248" label="NRF1 (GRN) VWF" source="82478" target="82473" cy:directed="1"/>
      <edge id="83247" label="NRF1 (GRN) ITGB2" source="82478" target="82472" cy:directed="1"/>
      <edge id="83246" label="NRF1 (GRN) CDC45" source="82478" target="82471" cy:directed="1"/>
      <edge id="83245" label="NRF1 (GRN) CD97" source="82478" target="82470" cy:directed="1"/>
      <edge id="83244" label="NRF1 (GRN) CAPN8" source="82478" target="82469" cy:directed="1"/>
      <edge id="83243" label="NRF1 (GRN) TGFBR2" source="82478" target="82468" cy:directed="1"/>
      <edge id="83242" label="NRF1 (GRN) SFTA3" source="82478" target="82467" cy:directed="1"/>
      <edge id="83241" label="NRF1 (GRN) SHE" source="82478" target="82466" cy:directed="1"/>
      <edge id="83240" label="NRF1 (GRN) MYO1F" source="82478" target="82465" cy:directed="1"/>
      <edge id="83239" label="NRF1 (GRN) SMARCB1" source="82478" target="82464" cy:directed="1"/>
      <edge id="83238" label="NRF1 (GRN) TRIP13" source="82478" target="82463" cy:directed="1"/>
      <edge id="83237" label="NRF1 (GRN) PSMC5" source="82478" target="82462" cy:directed="1"/>
      <edge id="83236" label="NRF1 (GRN) UNC13D" source="82478" target="82461" cy:directed="1"/>
      <edge id="83235" label="NRF1 (GRN) AUNIP" source="82478" target="82460" cy:directed="1"/>
      <edge id="83234" label="NRF1 (GRN) POLDIP2" source="82478" target="82459" cy:directed="1"/>
      <edge id="83233" label="NRF1 (GRN) ARHGAP30" source="82478" target="82458" cy:directed="1"/>
      <edge id="83232" label="NRF1 (GRN) MCM5" source="82478" target="82457" cy:directed="1"/>
      <edge id="83231" label="NRF1 (GRN) CORO1A" source="82478" target="82456" cy:directed="1"/>
      <edge id="83230" label="NRF1 (GRN) ACVRL1" source="82478" target="82298" cy:directed="1"/>
      <edge id="83229" label="NRF1 (GRN) FGR" source="82478" target="82297" cy:directed="1"/>
      <edge id="83228" label="NRF1 (GRN) SIGLEC9" source="82478" target="82296" cy:directed="1"/>
      <edge id="83227" label="NRF1 (GRN) ZNF74" source="82478" target="82295" cy:directed="1"/>
      <edge id="83226" label="NRF1 (GRN) TMEM100" source="82478" target="82294" cy:directed="1"/>
      <edge id="83225" label="NRF1 (GRN) SNRPD3" source="82478" target="82293" cy:directed="1"/>
      <edge id="83224" label="NRF1 (GRN) ST3GAL5" source="82478" target="82432" cy:directed="1"/>
      <edge id="83223" label="NRF1 (GRN) SLAMF8" source="82478" target="82292" cy:directed="1"/>
      <edge id="83222" label="NRF1 (GRN) HHIP" source="82478" target="82291" cy:directed="1"/>
      <edge id="83221" label="NRF1 (GRN) PES1" source="82478" target="82290" cy:directed="1"/>
      <edge id="83220" label="NRF1 (GRN) DPEP2" source="82478" target="82289" cy:directed="1"/>
      <edge id="83219" label="NRF1 (GRN) ARHGDIB" source="82478" target="82288" cy:directed="1"/>
      <edge id="83218" label="NRF1 (GRN) NDUFS6" source="82478" target="82287" cy:directed="1"/>
      <edge id="83217" label="NRF1 (GRN) GALNT10" source="82478" target="82286" cy:directed="1"/>
      <edge id="83216" label="NRF1 (GRN) ASAH1" source="82478" target="82285" cy:directed="1"/>
      <edge id="83215" label="NRF1 (GRN) TOMM22" source="82478" target="82284" cy:directed="1"/>
      <edge id="83214" label="NRF1 (GRN) ABCC5" source="82478" target="82300" cy:directed="1"/>
      <edge id="83213" label="NRF1 (GRN) CD180" source="82478" target="82283" cy:directed="1"/>
      <edge id="83212" label="NRF1 (GRN) DRG1" source="82478" target="82282" cy:directed="1"/>
      <edge id="83211" label="NRF1 (GRN) MND1" source="82478" target="82281" cy:directed="1"/>
      <edge id="83210" label="NRF1 (GRN) PCNA" source="82478" target="82280" cy:directed="1"/>
      <edge id="83209" label="NRF1 (GRN) HCLS1" source="82478" target="82279" cy:directed="1"/>
      <edge id="83208" label="NRF1 (GRN) CPM" source="82478" target="82278" cy:directed="1"/>
      <edge id="83207" label="NRF1 (GRN) STEAP4" source="82478" target="82277" cy:directed="1"/>
      <edge id="83206" label="NRF1 (GRN) MFNG" source="82478" target="82276" cy:directed="1"/>
      <edge id="83205" label="NRF1 (GRN) TNS3" source="82478" target="82275" cy:directed="1"/>
      <edge id="83204" label="LRRC25 (GCN) ALDH3B1" source="82477" target="82475" cy:directed="1"/>
      <edge id="83203" label="TOR4A (GCN) ACVRL1" source="82476" target="82298" cy:directed="1"/>
      <edge id="83202" label="TOR4A (GCN) SLAMF8" source="82476" target="82292" cy:directed="1"/>
      <edge id="83201" label="TOR4A (GCN) CD180" source="82476" target="82283" cy:directed="1"/>
      <edge id="83200" label="TOR4A (GCN) ALDH3B1" source="82476" target="82475" cy:directed="1"/>
      <edge id="83199" label="TOR4A (GCN) MFNG" source="82476" target="82276" cy:directed="1"/>
      <edge id="83198" label="ALDH3B1 (GCN) FGR" source="82475" target="82297" cy:directed="1"/>
      <edge id="83197" label="ALDH3B1 (GCN) SIGLEC9" source="82475" target="82296" cy:directed="1"/>
      <edge id="83196" label="ALDH3B1 (GCN) ARHGDIB" source="82475" target="82288" cy:directed="1"/>
      <edge id="83195" label="CCR1 (GCN) ALDH3B1" source="82474" target="82475" cy:directed="1"/>
      <edge id="83194" label="VWF (GCN) SHE" source="82473" target="82466" cy:directed="1"/>
      <edge id="83193" label="ITGB2 (GCN) ALDH3B1" source="82472" target="82475" cy:directed="1"/>
      <edge id="83192" label="CDC45 (GCN) ZNF74" source="82471" target="82295" cy:directed="1"/>
      <edge id="83191" label="CDC45 (GCN) SNRPD3" source="82471" target="82293" cy:directed="1"/>
      <edge id="83190" label="CDC45 (GCN) ST3GAL5" source="82471" target="82432" cy:directed="1"/>
      <edge id="83189" label="CDC45 (GCN) PES1" source="82471" target="82290" cy:directed="1"/>
      <edge id="83188" label="CDC45 (GCN) GALNT10" source="82471" target="82286" cy:directed="1"/>
      <edge id="83187" label="CDC45 (GCN) ASAH1" source="82471" target="82285" cy:directed="1"/>
      <edge id="83186" label="CDC45 (GCN) TOMM22" source="82471" target="82284" cy:directed="1"/>
      <edge id="83185" label="CDC45 (GCN) DRG1" source="82471" target="82282" cy:directed="1"/>
      <edge id="83184" label="CDC45 (GCN) PCNA" source="82471" target="82280" cy:directed="1"/>
      <edge id="83183" label="CDC45 (GCN) CPM" source="82471" target="82278" cy:directed="1"/>
      <edge id="83182" label="CDC45 (GCN) STEAP4" source="82471" target="82277" cy:directed="1"/>
      <edge id="83181" label="CDC45 (GCN) TNS3" source="82471" target="82275" cy:directed="1"/>
      <edge id="83180" label="CD97 (GCN) ALDH3B1" source="82470" target="82475" cy:directed="1"/>
      <edge id="83179" label="CD97 (GCN) CDC45" source="82470" target="82471" cy:directed="1"/>
      <edge id="83178" label="CAPN8 (GCN) TMEM100" source="82469" target="82294" cy:directed="1"/>
      <edge id="83177" label="TGFBR2 (GCN) ALDH3B1" source="82468" target="82475" cy:directed="1"/>
      <edge id="83176" label="TGFBR2 (GCN) TROAP" source="82468" target="82422" cy:directed="1"/>
      <edge id="83175" label="SFTA3 (GCN) HHIP" source="82467" target="82291" cy:directed="1"/>
      <edge id="83174" label="SHE (GCN) DPEP2" source="82466" target="82289" cy:directed="1"/>
      <edge id="83173" label="SHE (GCN) CCDC69" source="82466" target="82265" cy:directed="1"/>
      <edge id="83172" label="MYO1F (GCN) ALDH3B1" source="82465" target="82475" cy:directed="1"/>
      <edge id="83171" label="SMARCB1 (GCN) CDC45" source="82464" target="82471" cy:directed="1"/>
      <edge id="83170" label="TRIP13 (GCN) NDUFS6" source="82463" target="82287" cy:directed="1"/>
      <edge id="83169" label="TRIP13 (GCN) MRPL36" source="82463" target="82273" cy:directed="1"/>
      <edge id="83168" label="PSMC5 (GCN) ABCC5" source="82462" target="82300" cy:directed="1"/>
      <edge id="83167" label="UNC13D (GCN) CDC45" source="82461" target="82471" cy:directed="1"/>
      <edge id="83166" label="AUNIP (GCN) MND1" source="82460" target="82281" cy:directed="1"/>
      <edge id="83165" label="POLDIP2 (GCN) ABCC5" source="82459" target="82300" cy:directed="1"/>
      <edge id="83164" label="ARHGAP30 (GCN) HCLS1" source="82458" target="82279" cy:directed="1"/>
      <edge id="83163" label="MCM5 (GCN) CDC45" source="82457" target="82471" cy:directed="1"/>
      <edge id="83162" label="CORO1A (GCN) ALDH3B1" source="82456" target="82475" cy:directed="1"/>
      <edge id="83161" label="ETV4 (GRN) LIMS2" source="82455" target="82454" cy:directed="1"/>
      <edge id="83160" label="ETV4 (GRN) TRIP13" source="82455" target="82463" cy:directed="1"/>
      <edge id="83159" label="ETV4 (GRN) INMT" source="82455" target="82453" cy:directed="1"/>
      <edge id="83158" label="ETV4 (GRN) LPCAT1" source="82455" target="82452" cy:directed="1"/>
      <edge id="83157" label="ETV4 (GRN) POP5" source="82455" target="82274" cy:directed="1"/>
      <edge id="83156" label="ETV4 (GRN) MRPL36" source="82455" target="82273" cy:directed="1"/>
      <edge id="83155" label="ETV4 (GRN) NKX2-1" source="82455" target="82435" cy:directed="1"/>
      <edge id="83154" label="LIMS2 (GCN) POP5" source="82454" target="82274" cy:directed="1"/>
      <edge id="83153" label="LIMS2 (GCN) VCP" source="82454" target="82264" cy:directed="1"/>
      <edge id="83152" label="INMT (GCN) NKX2-1" source="82453" target="82435" cy:directed="1"/>
      <edge id="83151" label="LPCAT1 (GCN) NKX2-1" source="82452" target="82435" cy:directed="1"/>
      <edge id="83150" label="ELF1 (GRN) LPCAT1" source="82451" target="82452" cy:directed="1"/>
      <edge id="83149" label="ELF1 (GRN) ZNF320" source="82451" target="82450" cy:directed="1"/>
      <edge id="83148" label="ELF1 (GRN) NKX2-1" source="82451" target="82435" cy:directed="1"/>
      <edge id="83147" label="ELF1 (GRN) EIF4G1" source="82451" target="82272" cy:directed="1"/>
      <edge id="83146" label="ZNF320 (GCN) EIF4G1" source="82450" target="82272" cy:directed="1"/>
      <edge id="83145" label="ZNF320 (GCN) C1orf162" source="82450" target="82269" cy:directed="1"/>
      <edge id="83144" label="ZNF320 (GCN) THEMIS2" source="82450" target="82266" cy:directed="1"/>
      <edge id="83143" label="ZNF320 (GCN) NFAM1" source="82450" target="82259" cy:directed="1"/>
      <edge id="83142" label="SMARCC2 (GRN) TOR4A" source="82449" target="82476" cy:directed="1"/>
      <edge id="83141" label="SMARCC2 (GRN) CENPO" source="82449" target="82448" cy:directed="1"/>
      <edge id="83140" label="SMARCC2 (GRN) ARHGAP30" source="82449" target="82458" cy:directed="1"/>
      <edge id="83139" label="SMARCC2 (GRN) DNAJC19" source="82449" target="82447" cy:directed="1"/>
      <edge id="83138" label="SMARCC2 (GRN) ACVRL1" source="82449" target="82298" cy:directed="1"/>
      <edge id="83137" label="SMARCC2 (GRN) C11orf82" source="82449" target="82271" cy:directed="1"/>
      <edge id="83136" label="SMARCC2 (GRN) SLAMF8" source="82449" target="82292" cy:directed="1"/>
      <edge id="83135" label="SMARCC2 (GRN) CD180" source="82449" target="82283" cy:directed="1"/>
      <edge id="83134" label="SMARCC2 (GRN) HCLS1" source="82449" target="82279" cy:directed="1"/>
      <edge id="83133" label="SMARCC2 (GRN) MFNG" source="82449" target="82276" cy:directed="1"/>
      <edge id="83132" label="SMARCC2 (GRN) ABCC5" source="82449" target="82300" cy:directed="1"/>
      <edge id="83131" label="CENPO (GCN) C11orf82" source="82448" target="82271" cy:directed="1"/>
      <edge id="83130" label="CENPO (GCN) SPC25" source="82448" target="82417" cy:directed="1"/>
      <edge id="83129" label="CENPO (GCN) TROAP" source="82448" target="82422" cy:directed="1"/>
      <edge id="83128" label="DNAJC19 (GCN) ABCC5" source="82447" target="82300" cy:directed="1"/>
      <edge id="83127" label="BRCA1 (GRN) LIMS2" source="82446" target="82454" cy:directed="1"/>
      <edge id="83126" label="BRCA1 (GRN) NLRP9" source="82446" target="82445" cy:directed="1"/>
      <edge id="83125" label="BRCA1 (GRN) SLC22A31" source="82446" target="82444" cy:directed="1"/>
      <edge id="83124" label="BRCA1 (GRN) RHOBTB2" source="82446" target="82443" cy:directed="1"/>
      <edge id="83123" label="BRCA1 (GRN) LPCAT1" source="82446" target="82452" cy:directed="1"/>
      <edge id="83122" label="BRCA1 (GRN) POP5" source="82446" target="82274" cy:directed="1"/>
      <edge id="83121" label="BRCA1 (GRN) SFTPB" source="82446" target="82270" cy:directed="1"/>
      <edge id="83120" label="BRCA1 (GRN) CAPN8" source="82446" target="82469" cy:directed="1"/>
      <edge id="83119" label="BRCA1 (GRN) SHE" source="82446" target="82466" cy:directed="1"/>
      <edge id="83118" label="BRCA1 (GRN) NKX2-1" source="82446" target="82435" cy:directed="1"/>
      <edge id="83117" label="NLRP9 (GCN) SFTPB" source="82445" target="82270" cy:directed="1"/>
      <edge id="83116" label="SLC22A31 (GCN) CAPN8" source="82444" target="82469" cy:directed="1"/>
      <edge id="83115" label="RHOBTB2 (GCN) SHE" source="82443" target="82466" cy:directed="1"/>
      <edge id="83114" label="ELF4 (GRN) NLRP9" source="82442" target="82445" cy:directed="1"/>
      <edge id="83113" label="ELF4 (GRN) SLC22A31" source="82442" target="82444" cy:directed="1"/>
      <edge id="83112" label="ELF4 (GRN) TRIP13" source="82442" target="82463" cy:directed="1"/>
      <edge id="83111" label="ELF4 (GRN) MC4R" source="82442" target="82441" cy:directed="1"/>
      <edge id="83110" label="ELF4 (GRN) WNT5A" source="82442" target="82440" cy:directed="1"/>
      <edge id="83109" label="ELF4 (GRN) ZNF320" source="82442" target="82450" cy:directed="1"/>
      <edge id="83108" label="ELF4 (GRN) LPCAT1" source="82442" target="82452" cy:directed="1"/>
      <edge id="83107" label="ELF4 (GRN) TRIM16L" source="82442" target="82439" cy:directed="1"/>
      <edge id="83106" label="ELF4 (GRN) KNSTRN" source="82442" target="82438" cy:directed="1"/>
      <edge id="83105" label="ELF4 (GRN) SFTPB" source="82442" target="82270" cy:directed="1"/>
      <edge id="83104" label="ELF4 (GRN) CAPN8" source="82442" target="82469" cy:directed="1"/>
      <edge id="83103" label="ELF4 (GRN) MRPL36" source="82442" target="82273" cy:directed="1"/>
      <edge id="83102" label="ELF4 (GRN) C1orf162" source="82442" target="82269" cy:directed="1"/>
      <edge id="83101" label="ELF4 (GRN) NKX2-1" source="82442" target="82435" cy:directed="1"/>
      <edge id="83100" label="ELF4 (GRN) C1QBP" source="82442" target="82268" cy:directed="1"/>
      <edge id="83099" label="ELF4 (GRN) MVP" source="82442" target="82420" cy:directed="1"/>
      <edge id="83098" label="ELF4 (GRN) EIF4G1" source="82442" target="82272" cy:directed="1"/>
      <edge id="83097" label="MC4R (GCN) SFTPB" source="82441" target="82270" cy:directed="1"/>
      <edge id="83096" label="WNT5A (GCN) TRIM16L" source="82440" target="82439" cy:directed="1"/>
      <edge id="83095" label="TRIM16L (GCN) C1QBP" source="82439" target="82268" cy:directed="1"/>
      <edge id="83094" label="KNSTRN (GCN) MVP" source="82438" target="82420" cy:directed="1"/>
      <edge id="83093" label="KNSTRN (GCN) TROAP" source="82438" target="82422" cy:directed="1"/>
      <edge id="83092" label="KNSTRN (GCN) SPC25" source="82438" target="82417" cy:directed="1"/>
      <edge id="83091" label="ETV3 (GRN) TRIP13" source="82437" target="82463" cy:directed="1"/>
      <edge id="83090" label="ETV3 (GRN) CAPN8" source="82437" target="82469" cy:directed="1"/>
      <edge id="83089" label="ETV3 (GRN) SFTA2" source="82437" target="82436" cy:directed="1"/>
      <edge id="83088" label="ETV3 (GRN) INMT" source="82437" target="82453" cy:directed="1"/>
      <edge id="83087" label="ETV3 (GRN) ZNF320" source="82437" target="82450" cy:directed="1"/>
      <edge id="83086" label="ETV3 (GRN) LPCAT1" source="82437" target="82452" cy:directed="1"/>
      <edge id="83085" label="ETV3 (GRN) NKX2-1" source="82437" target="82435" cy:directed="1"/>
      <edge id="83084" label="ETV3 (GRN) ARHGAP30" source="82437" target="82458" cy:directed="1"/>
      <edge id="83083" label="ETV3 (GRN) SHE" source="82437" target="82466" cy:directed="1"/>
      <edge id="83082" label="ETV3 (GRN) MRPL36" source="82437" target="82273" cy:directed="1"/>
      <edge id="83081" label="ETV3 (GRN) TMEM100" source="82437" target="82294" cy:directed="1"/>
      <edge id="83080" label="ETV3 (GRN) FGA" source="82437" target="82267" cy:directed="1"/>
      <edge id="83079" label="ETV3 (GRN) C1orf162" source="82437" target="82269" cy:directed="1"/>
      <edge id="83078" label="ETV3 (GRN) THEMIS2" source="82437" target="82266" cy:directed="1"/>
      <edge id="83077" label="ETV3 (GRN) HCLS1" source="82437" target="82279" cy:directed="1"/>
      <edge id="83076" label="ETV3 (GRN) CCDC69" source="82437" target="82265" cy:directed="1"/>
      <edge id="83075" label="SFTA2 (GCN) FGA" source="82436" target="82267" cy:directed="1"/>
      <edge id="83074" label="NKX2-1 (GCN) TMEM100" source="82435" target="82294" cy:directed="1"/>
      <edge id="83073" label="NKX2-1 (GCN) KIAA0408" source="82435" target="82234" cy:directed="1"/>
      <edge id="83072" label="ETV6 (GRN) SFTPD" source="82434" target="82433" cy:directed="1"/>
      <edge id="83071" label="ETV6 (GRN) LIMS2" source="82434" target="82454" cy:directed="1"/>
      <edge id="83070" label="ETV6 (GRN) TOR4A" source="82434" target="82476" cy:directed="1"/>
      <edge id="83069" label="ETV6 (GRN) NLRP9" source="82434" target="82445" cy:directed="1"/>
      <edge id="83068" label="ETV6 (GRN) ST3GAL5" source="82434" target="82432" cy:directed="1"/>
      <edge id="83067" label="ETV6 (GRN) DTD2" source="82434" target="82431" cy:directed="1"/>
      <edge id="83066" label="ETV6 (GRN) MC4R" source="82434" target="82441" cy:directed="1"/>
      <edge id="83065" label="ETV6 (GRN) SFTA3" source="82434" target="82467" cy:directed="1"/>
      <edge id="83064" label="ETV6 (GRN) ZNF320" source="82434" target="82450" cy:directed="1"/>
      <edge id="83063" label="ETV6 (GRN) LPCAT1" source="82434" target="82452" cy:directed="1"/>
      <edge id="83062" label="ETV6 (GRN) SLC39A8" source="82434" target="82430" cy:directed="1"/>
      <edge id="83061" label="ETV6 (GRN) H2AFY2" source="82434" target="82429" cy:directed="1"/>
      <edge id="83060" label="ETV6 (GRN) ARHGAP30" source="82434" target="82458" cy:directed="1"/>
      <edge id="83059" label="ETV6 (GRN) SHE" source="82434" target="82466" cy:directed="1"/>
      <edge id="83058" label="ETV6 (GRN) SFTA2" source="82434" target="82436" cy:directed="1"/>
      <edge id="83057" label="ETV6 (GRN) VCP" source="82434" target="82264" cy:directed="1"/>
      <edge id="83056" label="ETV6 (GRN) POP5" source="82434" target="82274" cy:directed="1"/>
      <edge id="83055" label="ETV6 (GRN) ACVRL1" source="82434" target="82298" cy:directed="1"/>
      <edge id="83054" label="ETV6 (GRN) SFTPB" source="82434" target="82270" cy:directed="1"/>
      <edge id="83053" label="ETV6 (GRN) ARRB1" source="82434" target="82263" cy:directed="1"/>
      <edge id="83052" label="ETV6 (GRN) MBIP" source="82434" target="82262" cy:directed="1"/>
      <edge id="83051" label="ETV6 (GRN) HHIP" source="82434" target="82291" cy:directed="1"/>
      <edge id="83050" label="ETV6 (GRN) C1orf162" source="82434" target="82269" cy:directed="1"/>
      <edge id="83049" label="ETV6 (GRN) NKX2-1" source="82434" target="82435" cy:directed="1"/>
      <edge id="83048" label="ETV6 (GRN) CD180" source="82434" target="82283" cy:directed="1"/>
      <edge id="83047" label="ETV6 (GRN) ZWINT" source="82434" target="82261" cy:directed="1"/>
      <edge id="83046" label="ETV6 (GRN) HCLS1" source="82434" target="82279" cy:directed="1"/>
      <edge id="83045" label="ETV6 (GRN) CCDC69" source="82434" target="82265" cy:directed="1"/>
      <edge id="83044" label="ETV6 (GRN) EIF4G1" source="82434" target="82272" cy:directed="1"/>
      <edge id="83043" label="SFTPD (GCN) SFTA2" source="82433" target="82436" cy:directed="1"/>
      <edge id="83042" label="ST3GAL5 (GCN) ARRB1" source="82432" target="82263" cy:directed="1"/>
      <edge id="83041" label="ST3GAL5 (GCN) RAD51" source="82432" target="82413" cy:directed="1"/>
      <edge id="83040" label="DTD2 (GCN) MBIP" source="82431" target="82262" cy:directed="1"/>
      <edge id="83039" label="SLC39A8 (GCN) SHE" source="82430" target="82466" cy:directed="1"/>
      <edge id="83038" label="H2AFY2 (GCN) ZWINT" source="82429" target="82261" cy:directed="1"/>
      <edge id="83037" label="GABPA (GRN) LIMS2" source="82428" target="82454" cy:directed="1"/>
      <edge id="83036" label="GABPA (GRN) TOR4A" source="82428" target="82476" cy:directed="1"/>
      <edge id="83035" label="GABPA (GRN) OIP5" source="82428" target="82427" cy:directed="1"/>
      <edge id="83034" label="GABPA (GRN) TIMELESS" source="82428" target="82426" cy:directed="1"/>
      <edge id="83033" label="GABPA (GRN) ZNF320" source="82428" target="82450" cy:directed="1"/>
      <edge id="83032" label="GABPA (GRN) ADAL" source="82428" target="82425" cy:directed="1"/>
      <edge id="83031" label="GABPA (GRN) VWF" source="82428" target="82473" cy:directed="1"/>
      <edge id="83030" label="GABPA (GRN) NLRP9" source="82428" target="82445" cy:directed="1"/>
      <edge id="83029" label="GABPA (GRN) FOXM1" source="82428" target="82424" cy:directed="1"/>
      <edge id="83028" label="GABPA (GRN) RFC5" source="82428" target="82423" cy:directed="1"/>
      <edge id="83027" label="GABPA (GRN) CENPO" source="82428" target="82448" cy:directed="1"/>
      <edge id="83026" label="GABPA (GRN) SLC22A31" source="82428" target="82444" cy:directed="1"/>
      <edge id="83025" label="GABPA (GRN) KNSTRN" source="82428" target="82438" cy:directed="1"/>
      <edge id="83024" label="GABPA (GRN) TROAP" source="82428" target="82422" cy:directed="1"/>
      <edge id="83023" label="GABPA (GRN) TMEM45B" source="82428" target="82421" cy:directed="1"/>
      <edge id="83022" label="GABPA (GRN) MVP" source="82428" target="82420" cy:directed="1"/>
      <edge id="83021" label="GABPA (GRN) CDCA5" source="82428" target="82419" cy:directed="1"/>
      <edge id="83020" label="GABPA (GRN) MC4R" source="82428" target="82441" cy:directed="1"/>
      <edge id="83019" label="GABPA (GRN) SFTA2" source="82428" target="82436" cy:directed="1"/>
      <edge id="83018" label="GABPA (GRN) PIK3R6" source="82428" target="82418" cy:directed="1"/>
      <edge id="83017" label="GABPA (GRN) SPC25" source="82428" target="82417" cy:directed="1"/>
      <edge id="83016" label="GABPA (GRN) COX5A" source="82428" target="82416" cy:directed="1"/>
      <edge id="83015" label="GABPA (GRN) SFTA3" source="82428" target="82467" cy:directed="1"/>
      <edge id="83014" label="GABPA (GRN) WNT5A" source="82428" target="82440" cy:directed="1"/>
      <edge id="83013" label="GABPA (GRN) INMT" source="82428" target="82453" cy:directed="1"/>
      <edge id="83012" label="GABPA (GRN) SHE" source="82428" target="82466" cy:directed="1"/>
      <edge id="83011" label="GABPA (GRN) TGFBR2" source="82428" target="82468" cy:directed="1"/>
      <edge id="83010" label="GABPA (GRN) RNASEH2A" source="82428" target="82415" cy:directed="1"/>
      <edge id="83009" label="GABPA (GRN) YEATS4" source="82428" target="82414" cy:directed="1"/>
      <edge id="83008" label="GABPA (GRN) LPCAT1" source="82428" target="82452" cy:directed="1"/>
      <edge id="83007" label="GABPA (GRN) TRIM16L" source="82428" target="82439" cy:directed="1"/>
      <edge id="83006" label="GABPA (GRN) RAD51" source="82428" target="82413" cy:directed="1"/>
      <edge id="83005" label="GABPA (GRN) C15orf40" source="82428" target="82412" cy:directed="1"/>
      <edge id="83004" label="GABPA (GRN) SLC39A8" source="82428" target="82430" cy:directed="1"/>
      <edge id="83003" label="GABPA (GRN) ST3GAL5" source="82428" target="82432" cy:directed="1"/>
      <edge id="83002" label="GABPA (GRN) AUNIP" source="82428" target="82460" cy:directed="1"/>
      <edge id="83001" label="GABPA (GRN) SKP2" source="82428" target="82411" cy:directed="1"/>
      <edge id="83000" label="GABPA (GRN) ARHGAP30" source="82428" target="82458" cy:directed="1"/>
      <edge id="82999" label="GABPA (GRN) TRAIP" source="82428" target="82410" cy:directed="1"/>
      <edge id="82998" label="GABPA (GRN) VCP" source="82428" target="82264" cy:directed="1"/>
      <edge id="82997" label="GABPA (GRN) POP5" source="82428" target="82274" cy:directed="1"/>
      <edge id="82996" label="GABPA (GRN) ACVRL1" source="82428" target="82298" cy:directed="1"/>
      <edge id="82995" label="GABPA (GRN) RPUSD2" source="82428" target="82260" cy:directed="1"/>
      <edge id="82994" label="GABPA (GRN) NFAM1" source="82428" target="82259" cy:directed="1"/>
      <edge id="82993" label="GABPA (GRN) SFTPB" source="82428" target="82270" cy:directed="1"/>
      <edge id="82992" label="GABPA (GRN) CAPN8" source="82428" target="82469" cy:directed="1"/>
      <edge id="82991" label="GABPA (GRN) TMEM79" source="82428" target="82258" cy:directed="1"/>
      <edge id="82990" label="GABPA (GRN) GINS2" source="82428" target="82257" cy:directed="1"/>
      <edge id="82989" label="GABPA (GRN) FGA" source="82428" target="82267" cy:directed="1"/>
      <edge id="82988" label="GABPA (GRN) PRIM1" source="82428" target="82256" cy:directed="1"/>
      <edge id="82987" label="GABPA (GRN) GINS1" source="82428" target="82255" cy:directed="1"/>
      <edge id="82986" label="GABPA (GRN) SLAMF8" source="82428" target="82292" cy:directed="1"/>
      <edge id="82985" label="GABPA (GRN) HHIP" source="82428" target="82291" cy:directed="1"/>
      <edge id="82984" label="GABPA (GRN) NKX2-1" source="82428" target="82435" cy:directed="1"/>
      <edge id="82983" label="GABPA (GRN) DPEP2" source="82428" target="82289" cy:directed="1"/>
      <edge id="82982" label="GABPA (GRN) C1orf162" source="82428" target="82269" cy:directed="1"/>
      <edge id="82981" label="GABPA (GRN) GALNT10" source="82428" target="82286" cy:directed="1"/>
      <edge id="82980" label="GABPA (GRN) LIN9" source="82428" target="82254" cy:directed="1"/>
      <edge id="82979" label="GABPA (GRN) C1QBP" source="82428" target="82268" cy:directed="1"/>
      <edge id="82978" label="GABPA (GRN) SUV39H1" source="82428" target="82253" cy:directed="1"/>
      <edge id="82977" label="GABPA (GRN) CD180" source="82428" target="82283" cy:directed="1"/>
      <edge id="82976" label="GABPA (GRN) PTPLAD1" source="82428" target="82252" cy:directed="1"/>
      <edge id="82975" label="GABPA (GRN) VWA9" source="82428" target="82251" cy:directed="1"/>
      <edge id="82974" label="GABPA (GRN) PSAT1" source="82428" target="82250" cy:directed="1"/>
      <edge id="82973" label="GABPA (GRN) THEMIS2" source="82428" target="82266" cy:directed="1"/>
      <edge id="82972" label="GABPA (GRN) DSCC1" source="82428" target="82249" cy:directed="1"/>
      <edge id="82971" label="GABPA (GRN) MND1" source="82428" target="82281" cy:directed="1"/>
      <edge id="82970" label="GABPA (GRN) POLR3K" source="82428" target="82248" cy:directed="1"/>
      <edge id="82969" label="GABPA (GRN) HCLS1" source="82428" target="82279" cy:directed="1"/>
      <edge id="82968" label="GABPA (GRN) CCDC69" source="82428" target="82265" cy:directed="1"/>
      <edge id="82967" label="GABPA (GRN) FAM103A1" source="82428" target="82247" cy:directed="1"/>
      <edge id="82966" label="GABPA (GRN) MFNG" source="82428" target="82276" cy:directed="1"/>
      <edge id="82965" label="OIP5 (GCN) MVP" source="82427" target="82420" cy:directed="1"/>
      <edge id="82964" label="OIP5 (GCN) RPUSD2" source="82427" target="82260" cy:directed="1"/>
      <edge id="82963" label="OIP5 (GCN) TROAP" source="82427" target="82422" cy:directed="1"/>
      <edge id="82962" label="OIP5 (GCN) CDCA5" source="82427" target="82419" cy:directed="1"/>
      <edge id="82961" label="OIP5 (GCN) GALNT10" source="82427" target="82286" cy:directed="1"/>
      <edge id="82960" label="OIP5 (GCN) LIN9" source="82427" target="82254" cy:directed="1"/>
      <edge id="82959" label="OIP5 (GCN) PTPLAD1" source="82427" target="82252" cy:directed="1"/>
      <edge id="82958" label="OIP5 (GCN) VWA9" source="82427" target="82251" cy:directed="1"/>
      <edge id="82957" label="OIP5 (GCN) DSCC1" source="82427" target="82249" cy:directed="1"/>
      <edge id="82956" label="OIP5 (GCN) RFC5" source="82427" target="82423" cy:directed="1"/>
      <edge id="82955" label="OIP5 (GCN) POLR3K" source="82427" target="82248" cy:directed="1"/>
      <edge id="82954" label="OIP5 (GCN) C1QBP" source="82427" target="82268" cy:directed="1"/>
      <edge id="82953" label="OIP5 (GCN) FAM103A1" source="82427" target="82247" cy:directed="1"/>
      <edge id="82952" label="OIP5 (GCN) C11orf82" source="82427" target="82271" cy:directed="1"/>
      <edge id="82951" label="OIP5 (GCN) GTF2A2" source="82427" target="82246" cy:directed="1"/>
      <edge id="82950" label="OIP5 (GCN) MRPL46" source="82427" target="82245" cy:directed="1"/>
      <edge id="82949" label="OIP5 (GCN) TIPIN" source="82427" target="82244" cy:directed="1"/>
      <edge id="82948" label="OIP5 (GCN) ACAT2" source="82427" target="82242" cy:directed="1"/>
      <edge id="82947" label="OIP5 (GCN) MTFMT" source="82427" target="82241" cy:directed="1"/>
      <edge id="82946" label="OIP5 (GCN) RFC4" source="82427" target="82393" cy:directed="1"/>
      <edge id="82945" label="TIMELESS (GCN) TROAP" source="82426" target="82422" cy:directed="1"/>
      <edge id="82944" label="ADAL (GCN) OIP5" source="82425" target="82427" cy:directed="1"/>
      <edge id="82943" label="FOXM1 (GCN) TROAP" source="82424" target="82422" cy:directed="1"/>
      <edge id="82942" label="RFC5 (GCN) TROAP" source="82423" target="82422" cy:directed="1"/>
      <edge id="82941" label="RFC5 (GCN) SPC25" source="82423" target="82417" cy:directed="1"/>
      <edge id="82940" label="TROAP (GCN) MVP" source="82422" target="82420" cy:directed="1"/>
      <edge id="82939" label="TROAP (GCN) GINS2" source="82422" target="82257" cy:directed="1"/>
      <edge id="82938" label="TROAP (GCN) GINS1" source="82422" target="82255" cy:directed="1"/>
      <edge id="82937" label="TROAP (GCN) SUV39H1" source="82422" target="82253" cy:directed="1"/>
      <edge id="82936" label="TROAP (GCN) GALNT10" source="82422" target="82286" cy:directed="1"/>
      <edge id="82935" label="TMEM45B (GCN) TMEM79" source="82421" target="82258" cy:directed="1"/>
      <edge id="82934" label="MVP (GCN) SPC25" source="82420" target="82417" cy:directed="1"/>
      <edge id="82933" label="CDCA5 (GCN) RAD51" source="82419" target="82413" cy:directed="1"/>
      <edge id="82932" label="CDCA5 (GCN) TROAP" source="82419" target="82422" cy:directed="1"/>
      <edge id="82931" label="PIK3R6 (GCN) SHE" source="82418" target="82466" cy:directed="1"/>
      <edge id="82930" label="SPC25 (GCN) PRIM1" source="82417" target="82256" cy:directed="1"/>
      <edge id="82929" label="COX5A (GCN) OIP5" source="82416" target="82427" cy:directed="1"/>
      <edge id="82928" label="COX5A (GCN) RAD51" source="82416" target="82413" cy:directed="1"/>
      <edge id="82927" label="RNASEH2A (GCN) TROAP" source="82415" target="82422" cy:directed="1"/>
      <edge id="82926" label="YEATS4 (GCN) TROAP" source="82414" target="82422" cy:directed="1"/>
      <edge id="82925" label="RAD51 (GCN) PSAT1" source="82413" target="82250" cy:directed="1"/>
      <edge id="82924" label="RAD51 (GCN) TROAP" source="82413" target="82422" cy:directed="1"/>
      <edge id="82923" label="RAD51 (GCN) COQ3" source="82413" target="82243" cy:directed="1"/>
      <edge id="82922" label="C15orf40 (GCN) OIP5" source="82412" target="82427" cy:directed="1"/>
      <edge id="82921" label="SKP2 (GCN) CDCA5" source="82411" target="82419" cy:directed="1"/>
      <edge id="82920" label="TRAIP (GCN) OIP5" source="82410" target="82427" cy:directed="1"/>
      <edge id="82919" label="NR2F6 (GRN) ADAL" source="82409" target="82425" cy:directed="1"/>
      <edge id="82918" label="NR2F6 (GRN) OIP5" source="82409" target="82427" cy:directed="1"/>
      <edge id="82917" label="NR2F6 (GRN) CENPO" source="82409" target="82448" cy:directed="1"/>
      <edge id="82916" label="NR2F6 (GRN) PSMA4" source="82409" target="82408" cy:directed="1"/>
      <edge id="82915" label="NR2F6 (GRN) COX5A" source="82409" target="82416" cy:directed="1"/>
      <edge id="82914" label="NR2F6 (GRN) C15orf40" source="82409" target="82412" cy:directed="1"/>
      <edge id="82913" label="NR2F6 (GRN) C11orf82" source="82409" target="82271" cy:directed="1"/>
      <edge id="82912" label="NR2F6 (GRN) GTF2A2" source="82409" target="82246" cy:directed="1"/>
      <edge id="82911" label="NR2F6 (GRN) MRPL46" source="82409" target="82245" cy:directed="1"/>
      <edge id="82910" label="NR2F6 (GRN) DSCC1" source="82409" target="82249" cy:directed="1"/>
      <edge id="82909" label="NR2F6 (GRN) POLR3K" source="82409" target="82248" cy:directed="1"/>
      <edge id="82908" label="NR2F6 (GRN) FAM103A1" source="82409" target="82247" cy:directed="1"/>
      <edge id="82907" label="PSMA4 (GCN) OIP5" source="82408" target="82427" cy:directed="1"/>
      <edge id="82906" label="SIX5 (GRN) TOR4A" source="82407" target="82476" cy:directed="1"/>
      <edge id="82905" label="SIX5 (GRN) ACVRL1" source="82407" target="82298" cy:directed="1"/>
      <edge id="82904" label="SIX5 (GRN) CD180" source="82407" target="82283" cy:directed="1"/>
      <edge id="82903" label="SIX5 (GRN) MFNG" source="82407" target="82276" cy:directed="1"/>
      <edge id="82902" label="TOPORS (GRN) ADAL" source="82406" target="82425" cy:directed="1"/>
      <edge id="82901" label="TOPORS (GRN) OIP5" source="82406" target="82427" cy:directed="1"/>
      <edge id="82900" label="TOPORS (GRN) CENPO" source="82406" target="82448" cy:directed="1"/>
      <edge id="82899" label="TOPORS (GRN) INMT" source="82406" target="82453" cy:directed="1"/>
      <edge id="82898" label="TOPORS (GRN) C15orf40" source="82406" target="82412" cy:directed="1"/>
      <edge id="82897" label="TOPORS (GRN) TOR4A" source="82406" target="82476" cy:directed="1"/>
      <edge id="82896" label="TOPORS (GRN) C11orf82" source="82406" target="82271" cy:directed="1"/>
      <edge id="82895" label="TOPORS (GRN) NKX2-1" source="82406" target="82435" cy:directed="1"/>
      <edge id="82894" label="TOPORS (GRN) GTF2A2" source="82406" target="82246" cy:directed="1"/>
      <edge id="82893" label="TOPORS (GRN) VWA9" source="82406" target="82251" cy:directed="1"/>
      <edge id="82892" label="TOPORS (GRN) DSCC1" source="82406" target="82249" cy:directed="1"/>
      <edge id="82891" label="TOPORS (GRN) POLR3K" source="82406" target="82248" cy:directed="1"/>
      <edge id="82890" label="TOPORS (GRN) FAM103A1" source="82406" target="82247" cy:directed="1"/>
      <edge id="82889" label="TOPORS (GRN) MFNG" source="82406" target="82276" cy:directed="1"/>
      <edge id="82888" label="PITX2 (GRN) LIMS2" source="82405" target="82454" cy:directed="1"/>
      <edge id="82887" label="PITX2 (GRN) TOR4A" source="82405" target="82476" cy:directed="1"/>
      <edge id="82886" label="PITX2 (GRN) ADAL" source="82405" target="82425" cy:directed="1"/>
      <edge id="82885" label="PITX2 (GRN) OIP5" source="82405" target="82427" cy:directed="1"/>
      <edge id="82884" label="PITX2 (GRN) KNSTRN" source="82405" target="82438" cy:directed="1"/>
      <edge id="82883" label="PITX2 (GRN) PSMA4" source="82405" target="82408" cy:directed="1"/>
      <edge id="82882" label="PITX2 (GRN) C2orf44" source="82405" target="82404" cy:directed="1"/>
      <edge id="82881" label="PITX2 (GRN) NABP2" source="82405" target="82403" cy:directed="1"/>
      <edge id="82880" label="PITX2 (GRN) RAD51" source="82405" target="82413" cy:directed="1"/>
      <edge id="82879" label="PITX2 (GRN) C15orf40" source="82405" target="82412" cy:directed="1"/>
      <edge id="82878" label="PITX2 (GRN) POP5" source="82405" target="82274" cy:directed="1"/>
      <edge id="82877" label="PITX2 (GRN) ACVRL1" source="82405" target="82298" cy:directed="1"/>
      <edge id="82876" label="PITX2 (GRN) TIPIN" source="82405" target="82244" cy:directed="1"/>
      <edge id="82875" label="PITX2 (GRN) SPC25" source="82405" target="82417" cy:directed="1"/>
      <edge id="82874" label="PITX2 (GRN) GTF2A2" source="82405" target="82246" cy:directed="1"/>
      <edge id="82873" label="PITX2 (GRN) ZNF320" source="82405" target="82450" cy:directed="1"/>
      <edge id="82872" label="PITX2 (GRN) CD180" source="82405" target="82283" cy:directed="1"/>
      <edge id="82871" label="PITX2 (GRN) TMEM79" source="82405" target="82258" cy:directed="1"/>
      <edge id="82870" label="PITX2 (GRN) VWA9" source="82405" target="82251" cy:directed="1"/>
      <edge id="82869" label="PITX2 (GRN) PSAT1" source="82405" target="82250" cy:directed="1"/>
      <edge id="82868" label="PITX2 (GRN) DSCC1" source="82405" target="82249" cy:directed="1"/>
      <edge id="82867" label="PITX2 (GRN) MFNG" source="82405" target="82276" cy:directed="1"/>
      <edge id="82866" label="C2orf44 (GCN) ZNF320" source="82404" target="82450" cy:directed="1"/>
      <edge id="82865" label="NABP2 (GCN) TMEM79" source="82403" target="82258" cy:directed="1"/>
      <edge id="82864" label="ARNTL (GRN) NLRP9" source="82402" target="82445" cy:directed="1"/>
      <edge id="82863" label="ARNTL (GRN) SLC22A31" source="82402" target="82444" cy:directed="1"/>
      <edge id="82862" label="ARNTL (GRN) DTD2" source="82402" target="82431" cy:directed="1"/>
      <edge id="82861" label="ARNTL (GRN) SFTPB" source="82402" target="82270" cy:directed="1"/>
      <edge id="82860" label="ARNTL (GRN) CAPN8" source="82402" target="82469" cy:directed="1"/>
      <edge id="82859" label="ARNTL (GRN) MBIP" source="82402" target="82262" cy:directed="1"/>
      <edge id="82858" label="DDIT3 (GRN) NLRP9" source="82401" target="82445" cy:directed="1"/>
      <edge id="82857" label="DDIT3 (GRN) SFTPB" source="82401" target="82270" cy:directed="1"/>
      <edge id="82856" label="ELK4 (GRN) LIMS2" source="82400" target="82454" cy:directed="1"/>
      <edge id="82855" label="ELK4 (GRN) TOR4A" source="82400" target="82476" cy:directed="1"/>
      <edge id="82854" label="ELK4 (GRN) OIP5" source="82400" target="82427" cy:directed="1"/>
      <edge id="82853" label="ELK4 (GRN) ZNF320" source="82400" target="82450" cy:directed="1"/>
      <edge id="82852" label="ELK4 (GRN) ADAL" source="82400" target="82425" cy:directed="1"/>
      <edge id="82851" label="ELK4 (GRN) VWF" source="82400" target="82473" cy:directed="1"/>
      <edge id="82850" label="ELK4 (GRN) NLRP9" source="82400" target="82445" cy:directed="1"/>
      <edge id="82849" label="ELK4 (GRN) TRIP13" source="82400" target="82463" cy:directed="1"/>
      <edge id="82848" label="ELK4 (GRN) CAPN8" source="82400" target="82469" cy:directed="1"/>
      <edge id="82847" label="ELK4 (GRN) COX5A" source="82400" target="82416" cy:directed="1"/>
      <edge id="82846" label="ELK4 (GRN) SFTA3" source="82400" target="82467" cy:directed="1"/>
      <edge id="82845" label="ELK4 (GRN) WNT5A" source="82400" target="82440" cy:directed="1"/>
      <edge id="82844" label="ELK4 (GRN) INMT" source="82400" target="82453" cy:directed="1"/>
      <edge id="82843" label="ELK4 (GRN) LPCAT1" source="82400" target="82452" cy:directed="1"/>
      <edge id="82842" label="ELK4 (GRN) TRIM16L" source="82400" target="82439" cy:directed="1"/>
      <edge id="82841" label="ELK4 (GRN) C15orf40" source="82400" target="82412" cy:directed="1"/>
      <edge id="82840" label="ELK4 (GRN) SLC39A8" source="82400" target="82430" cy:directed="1"/>
      <edge id="82839" label="ELK4 (GRN) NKX2-1" source="82400" target="82435" cy:directed="1"/>
      <edge id="82838" label="ELK4 (GRN) RAE1" source="82400" target="82399" cy:directed="1"/>
      <edge id="82837" label="ELK4 (GRN) AUNIP" source="82400" target="82460" cy:directed="1"/>
      <edge id="82836" label="ELK4 (GRN) ARHGAP30" source="82400" target="82458" cy:directed="1"/>
      <edge id="82835" label="ELK4 (GRN) SHE" source="82400" target="82466" cy:directed="1"/>
      <edge id="82834" label="ELK4 (GRN) TRAIP" source="82400" target="82410" cy:directed="1"/>
      <edge id="82833" label="ELK4 (GRN) POP5" source="82400" target="82274" cy:directed="1"/>
      <edge id="82832" label="ELK4 (GRN) ACVRL1" source="82400" target="82298" cy:directed="1"/>
      <edge id="82831" label="ELK4 (GRN) MVP" source="82400" target="82420" cy:directed="1"/>
      <edge id="82830" label="ELK4 (GRN) RPUSD2" source="82400" target="82260" cy:directed="1"/>
      <edge id="82829" label="ELK4 (GRN) NFAM1" source="82400" target="82259" cy:directed="1"/>
      <edge id="82828" label="ELK4 (GRN) SFTPB" source="82400" target="82270" cy:directed="1"/>
      <edge id="82827" label="ELK4 (GRN) MRPL36" source="82400" target="82273" cy:directed="1"/>
      <edge id="82826" label="ELK4 (GRN) TMEM100" source="82400" target="82294" cy:directed="1"/>
      <edge id="82825" label="ELK4 (GRN) HHIP" source="82400" target="82291" cy:directed="1"/>
      <edge id="82824" label="ELK4 (GRN) C1orf162" source="82400" target="82269" cy:directed="1"/>
      <edge id="82823" label="ELK4 (GRN) GALNT10" source="82400" target="82286" cy:directed="1"/>
      <edge id="82822" label="ELK4 (GRN) MRPL46" source="82400" target="82245" cy:directed="1"/>
      <edge id="82821" label="ELK4 (GRN) C1QBP" source="82400" target="82268" cy:directed="1"/>
      <edge id="82820" label="ELK4 (GRN) CD180" source="82400" target="82283" cy:directed="1"/>
      <edge id="82819" label="ELK4 (GRN) PTPLAD1" source="82400" target="82252" cy:directed="1"/>
      <edge id="82818" label="ELK4 (GRN) DSCC1" source="82400" target="82249" cy:directed="1"/>
      <edge id="82817" label="ELK4 (GRN) GINS1" source="82400" target="82255" cy:directed="1"/>
      <edge id="82816" label="ELK4 (GRN) MND1" source="82400" target="82281" cy:directed="1"/>
      <edge id="82815" label="ELK4 (GRN) POLR3K" source="82400" target="82248" cy:directed="1"/>
      <edge id="82814" label="ELK4 (GRN) HCLS1" source="82400" target="82279" cy:directed="1"/>
      <edge id="82813" label="ELK4 (GRN) CCDC69" source="82400" target="82265" cy:directed="1"/>
      <edge id="82812" label="ELK4 (GRN) FAM103A1" source="82400" target="82247" cy:directed="1"/>
      <edge id="82811" label="RAE1 (GCN) GINS1" source="82399" target="82255" cy:directed="1"/>
      <edge id="82810" label="ERF (GRN) TRIP13" source="82398" target="82463" cy:directed="1"/>
      <edge id="82809" label="ERF (GRN) CAPN8" source="82398" target="82469" cy:directed="1"/>
      <edge id="82808" label="ERF (GRN) SFTA3" source="82398" target="82467" cy:directed="1"/>
      <edge id="82807" label="ERF (GRN) WNT5A" source="82398" target="82440" cy:directed="1"/>
      <edge id="82806" label="ERF (GRN) LPCAT1" source="82398" target="82452" cy:directed="1"/>
      <edge id="82805" label="ERF (GRN) TOR4A" source="82398" target="82476" cy:directed="1"/>
      <edge id="82804" label="ERF (GRN) NKX2-1" source="82398" target="82435" cy:directed="1"/>
      <edge id="82803" label="ERF (GRN) ZNF320" source="82398" target="82450" cy:directed="1"/>
      <edge id="82802" label="ERF (GRN) SHE" source="82398" target="82466" cy:directed="1"/>
      <edge id="82801" label="ERF (GRN) MRPL36" source="82398" target="82273" cy:directed="1"/>
      <edge id="82800" label="ERF (GRN) TMEM100" source="82398" target="82294" cy:directed="1"/>
      <edge id="82799" label="ERF (GRN) HHIP" source="82398" target="82291" cy:directed="1"/>
      <edge id="82798" label="ERF (GRN) TRIM16L" source="82398" target="82439" cy:directed="1"/>
      <edge id="82797" label="ERF (GRN) CD180" source="82398" target="82283" cy:directed="1"/>
      <edge id="82796" label="ERF (GRN) THEMIS2" source="82398" target="82266" cy:directed="1"/>
      <edge id="82795" label="ERF (GRN) CCDC69" source="82398" target="82265" cy:directed="1"/>
      <edge id="82794" label="KLF5 (GRN) C15orf40" source="82397" target="82412" cy:directed="1"/>
      <edge id="82793" label="KLF5 (GRN) OIP5" source="82397" target="82427" cy:directed="1"/>
      <edge id="82792" label="MLX (GRN) SFTA3" source="82396" target="82467" cy:directed="1"/>
      <edge id="82791" label="MLX (GRN) LPCAT1" source="82396" target="82452" cy:directed="1"/>
      <edge id="82790" label="MLX (GRN) HHIP" source="82396" target="82291" cy:directed="1"/>
      <edge id="82789" label="MLX (GRN) NKX2-1" source="82396" target="82435" cy:directed="1"/>
      <edge id="82788" label="SREBF2 (GRN) SFTA3" source="82395" target="82467" cy:directed="1"/>
      <edge id="82787" label="SREBF2 (GRN) HHIP" source="82395" target="82291" cy:directed="1"/>
      <edge id="82786" label="USF1 (GRN) OIP5" source="82394" target="82427" cy:directed="1"/>
      <edge id="82785" label="USF1 (GRN) NLRP9" source="82394" target="82445" cy:directed="1"/>
      <edge id="82784" label="USF1 (GRN) RFC4" source="82394" target="82393" cy:directed="1"/>
      <edge id="82783" label="USF1 (GRN) RAD51" source="82394" target="82413" cy:directed="1"/>
      <edge id="82782" label="USF1 (GRN) WNT5A" source="82394" target="82440" cy:directed="1"/>
      <edge id="82781" label="USF1 (GRN) LPCAT1" source="82394" target="82452" cy:directed="1"/>
      <edge id="82780" label="USF1 (GRN) TRIM16L" source="82394" target="82439" cy:directed="1"/>
      <edge id="82779" label="USF1 (GRN) KNSTRN" source="82394" target="82438" cy:directed="1"/>
      <edge id="82778" label="USF1 (GRN) C15orf40" source="82394" target="82412" cy:directed="1"/>
      <edge id="82777" label="USF1 (GRN) TRAIP" source="82394" target="82410" cy:directed="1"/>
      <edge id="82776" label="USF1 (GRN) MVP" source="82394" target="82420" cy:directed="1"/>
      <edge id="82775" label="USF1 (GRN) SFTPB" source="82394" target="82270" cy:directed="1"/>
      <edge id="82774" label="USF1 (GRN) COQ3" source="82394" target="82243" cy:directed="1"/>
      <edge id="82773" label="USF1 (GRN) GTF2A2" source="82394" target="82246" cy:directed="1"/>
      <edge id="82772" label="USF1 (GRN) NKX2-1" source="82394" target="82435" cy:directed="1"/>
      <edge id="82771" label="USF1 (GRN) GALNT10" source="82394" target="82286" cy:directed="1"/>
      <edge id="82770" label="USF1 (GRN) MRPL46" source="82394" target="82245" cy:directed="1"/>
      <edge id="82769" label="USF1 (GRN) C1QBP" source="82394" target="82268" cy:directed="1"/>
      <edge id="82768" label="USF1 (GRN) PSAT1" source="82394" target="82250" cy:directed="1"/>
      <edge id="82767" label="USF1 (GRN) ACAT2" source="82394" target="82242" cy:directed="1"/>
      <edge id="82766" label="USF1 (GRN) MTFMT" source="82394" target="82241" cy:directed="1"/>
      <edge id="82765" label="USF1 (GRN) DSCC1" source="82394" target="82249" cy:directed="1"/>
      <edge id="82764" label="USF1 (GRN) POLR3K" source="82394" target="82248" cy:directed="1"/>
      <edge id="82763" label="USF1 (GRN) FAM103A1" source="82394" target="82247" cy:directed="1"/>
      <edge id="82762" label="RFC4 (GCN) MVP" source="82393" target="82420" cy:directed="1"/>
      <edge id="82761" label="USF2 (GRN) OIP5" source="82392" target="82427" cy:directed="1"/>
      <edge id="82760" label="USF2 (GRN) SLC22A31" source="82392" target="82444" cy:directed="1"/>
      <edge id="82759" label="USF2 (GRN) DTD2" source="82392" target="82431" cy:directed="1"/>
      <edge id="82758" label="USF2 (GRN) LPCAT1" source="82392" target="82452" cy:directed="1"/>
      <edge id="82757" label="USF2 (GRN) KNSTRN" source="82392" target="82438" cy:directed="1"/>
      <edge id="82756" label="USF2 (GRN) C15orf40" source="82392" target="82412" cy:directed="1"/>
      <edge id="82755" label="USF2 (GRN) MVP" source="82392" target="82420" cy:directed="1"/>
      <edge id="82754" label="USF2 (GRN) CAPN8" source="82392" target="82469" cy:directed="1"/>
      <edge id="82753" label="USF2 (GRN) MBIP" source="82392" target="82262" cy:directed="1"/>
      <edge id="82752" label="USF2 (GRN) NKX2-1" source="82392" target="82435" cy:directed="1"/>
      <edge id="82751" label="USF2 (GRN) GALNT10" source="82392" target="82286" cy:directed="1"/>
      <edge id="82750" label="USF2 (GRN) MRPL46" source="82392" target="82245" cy:directed="1"/>
      <edge id="82749" label="USF2 (GRN) MTFMT" source="82392" target="82241" cy:directed="1"/>
      <edge id="82748" label="USF2 (GRN) POLR3K" source="82392" target="82248" cy:directed="1"/>
      <edge id="82747" label="USF2 (GRN) C1QBP" source="82392" target="82268" cy:directed="1"/>
      <edge id="82746" label="USF2 (GRN) FAM103A1" source="82392" target="82247" cy:directed="1"/>
      <edge id="82745" label="ELF5 (GRN) SFTPD" source="82391" target="82433" cy:directed="1"/>
      <edge id="82744" label="ELF5 (GRN) KCNQ3" source="82391" target="82390" cy:directed="1"/>
      <edge id="82743" label="ELF5 (GRN) LPCAT1" source="82391" target="82452" cy:directed="1"/>
      <edge id="82742" label="ELF5 (GRN) SFTA2" source="82391" target="82436" cy:directed="1"/>
      <edge id="82741" label="ELF5 (GRN) NECAB1" source="82391" target="82240" cy:directed="1"/>
      <edge id="82740" label="ELF5 (GRN) NKX2-1" source="82391" target="82435" cy:directed="1"/>
      <edge id="82739" label="KCNQ3 (GCN) NECAB1" source="82390" target="82240" cy:directed="1"/>
      <edge id="82738" label="TFEB (GRN) OIP5" source="82389" target="82427" cy:directed="1"/>
      <edge id="82737" label="TFEB (GRN) COX5A" source="82389" target="82416" cy:directed="1"/>
      <edge id="82736" label="TFEB (GRN) KNSTRN" source="82389" target="82438" cy:directed="1"/>
      <edge id="82735" label="TFEB (GRN) C15orf40" source="82389" target="82412" cy:directed="1"/>
      <edge id="82734" label="TFEB (GRN) MVP" source="82389" target="82420" cy:directed="1"/>
      <edge id="82733" label="TFEB (GRN) GALNT10" source="82389" target="82286" cy:directed="1"/>
      <edge id="82732" label="TFEB (GRN) MTFMT" source="82389" target="82241" cy:directed="1"/>
      <edge id="82731" label="TFEB (GRN) DSCC1" source="82389" target="82249" cy:directed="1"/>
      <edge id="82730" label="TFEB (GRN) POLR3K" source="82389" target="82248" cy:directed="1"/>
      <edge id="82729" label="TFEB (GRN) FAM103A1" source="82389" target="82247" cy:directed="1"/>
      <edge id="82728" label="EHF (GRN) SFTPD" source="82388" target="82433" cy:directed="1"/>
      <edge id="82727" label="EHF (GRN) NLRP9" source="82388" target="82445" cy:directed="1"/>
      <edge id="82726" label="EHF (GRN) SLC22A31" source="82388" target="82444" cy:directed="1"/>
      <edge id="82725" label="EHF (GRN) LPCAT1" source="82388" target="82452" cy:directed="1"/>
      <edge id="82724" label="EHF (GRN) NABP2" source="82388" target="82403" cy:directed="1"/>
      <edge id="82723" label="EHF (GRN) ZNF320" source="82388" target="82450" cy:directed="1"/>
      <edge id="82722" label="EHF (GRN) SFTA2" source="82388" target="82436" cy:directed="1"/>
      <edge id="82721" label="EHF (GRN) SFTPB" source="82388" target="82270" cy:directed="1"/>
      <edge id="82720" label="EHF (GRN) CAPN8" source="82388" target="82469" cy:directed="1"/>
      <edge id="82719" label="EHF (GRN) NKX2-1" source="82388" target="82435" cy:directed="1"/>
      <edge id="82718" label="EHF (GRN) TMEM79" source="82388" target="82258" cy:directed="1"/>
      <edge id="82717" label="EHF (GRN) EIF4G1" source="82388" target="82272" cy:directed="1"/>
      <edge id="82716" label="ELF3 (GRN) SFTPD" source="82387" target="82433" cy:directed="1"/>
      <edge id="82715" label="ELF3 (GRN) NLRP9" source="82387" target="82445" cy:directed="1"/>
      <edge id="82714" label="ELF3 (GRN) CD97" source="82387" target="82470" cy:directed="1"/>
      <edge id="82713" label="ELF3 (GRN) SFTA2" source="82387" target="82436" cy:directed="1"/>
      <edge id="82712" label="ELF3 (GRN) MYO1F" source="82387" target="82465" cy:directed="1"/>
      <edge id="82711" label="ELF3 (GRN) C2orf44" source="82387" target="82404" cy:directed="1"/>
      <edge id="82710" label="ELF3 (GRN) LPCAT1" source="82387" target="82452" cy:directed="1"/>
      <edge id="82709" label="ELF3 (GRN) CORO1A" source="82387" target="82456" cy:directed="1"/>
      <edge id="82708" label="ELF3 (GRN) SFTPB" source="82387" target="82270" cy:directed="1"/>
      <edge id="82707" label="ELF3 (GRN) ALDH3B1" source="82387" target="82475" cy:directed="1"/>
      <edge id="82706" label="ELF3 (GRN) FGA" source="82387" target="82267" cy:directed="1"/>
      <edge id="82705" label="ELF3 (GRN) ZNF320" source="82387" target="82450" cy:directed="1"/>
      <edge id="82704" label="ELF3 (GRN) NKX2-1" source="82387" target="82435" cy:directed="1"/>
      <edge id="82703" label="ETV1 (GRN) LIMS2" source="82386" target="82454" cy:directed="1"/>
      <edge id="82702" label="ETV1 (GRN) LPCAT1" source="82386" target="82452" cy:directed="1"/>
      <edge id="82701" label="ETV1 (GRN) POP5" source="82386" target="82274" cy:directed="1"/>
      <edge id="82700" label="ETV1 (GRN) NKX2-1" source="82386" target="82435" cy:directed="1"/>
      <edge id="82699" label="RFX1 (GRN) TGM3" source="82385" target="82384" cy:directed="1"/>
      <edge id="82698" label="RFX1 (GRN) AKAP14" source="82385" target="82239" cy:directed="1"/>
      <edge id="82697" label="TGM3 (GCN) AKAP14" source="82384" target="82239" cy:directed="1"/>
      <edge id="82696" label="RFX2 (GRN) GPX2" source="82383" target="82484" cy:directed="1"/>
      <edge id="82695" label="RFX2 (GRN) C1orf192" source="82383" target="82483" cy:directed="1"/>
      <edge id="82694" label="RFX2 (GRN) SOX2" source="82383" target="82482" cy:directed="1"/>
      <edge id="82693" label="RFX2 (GRN) GSTA1" source="82383" target="82481" cy:directed="1"/>
      <edge id="82692" label="RFX2 (GRN) SFTPA2" source="82383" target="82382" cy:directed="1"/>
      <edge id="82691" label="RFX2 (GRN) TP63" source="82383" target="82479" cy:directed="1"/>
      <edge id="82690" label="RFX2 (GRN) KIAA0319" source="82383" target="82302" cy:directed="1"/>
      <edge id="82689" label="RFX2 (GRN) IQCG" source="82383" target="82301" cy:directed="1"/>
      <edge id="82688" label="RFX2 (GRN) C11orf53" source="82383" target="82238" cy:directed="1"/>
      <edge id="82687" label="RFX2 (GRN) ALDH3A1" source="82383" target="82299" cy:directed="1"/>
      <edge id="82686" label="SFTPA2 (GCN) C11orf53" source="82382" target="82238" cy:directed="1"/>
      <edge id="82685" label="RFX3 (GRN) GPX2" source="82381" target="82484" cy:directed="1"/>
      <edge id="82684" label="RFX3 (GRN) C1orf192" source="82381" target="82483" cy:directed="1"/>
      <edge id="82683" label="RFX3 (GRN) SOX2" source="82381" target="82482" cy:directed="1"/>
      <edge id="82682" label="RFX3 (GRN) TGM3" source="82381" target="82384" cy:directed="1"/>
      <edge id="82681" label="RFX3 (GRN) GSTA1" source="82381" target="82481" cy:directed="1"/>
      <edge id="82680" label="RFX3 (GRN) TP63" source="82381" target="82479" cy:directed="1"/>
      <edge id="82679" label="RFX3 (GRN) KIAA0319" source="82381" target="82302" cy:directed="1"/>
      <edge id="82678" label="RFX3 (GRN) IQCG" source="82381" target="82301" cy:directed="1"/>
      <edge id="82677" label="RFX3 (GRN) AKAP14" source="82381" target="82239" cy:directed="1"/>
      <edge id="82676" label="RFX3 (GRN) ALDH3A1" source="82381" target="82299" cy:directed="1"/>
      <edge id="82675" label="RFX4 (GRN) C1orf192" source="82380" target="82483" cy:directed="1"/>
      <edge id="82674" label="RFX4 (GRN) SOX2" source="82380" target="82482" cy:directed="1"/>
      <edge id="82673" label="RFX4 (GRN) TP63" source="82380" target="82479" cy:directed="1"/>
      <edge id="82672" label="RFX4 (GRN) IQCG" source="82380" target="82301" cy:directed="1"/>
      <edge id="82671" label="RFX4 (GRN) ALDH3A1" source="82380" target="82299" cy:directed="1"/>
      <edge id="82670" label="EOMES (GRN) TGM3" source="82379" target="82384" cy:directed="1"/>
      <edge id="82669" label="EOMES (GRN) AKAP14" source="82379" target="82239" cy:directed="1"/>
      <edge id="82668" label="RFX5 (GRN) GPX2" source="82378" target="82484" cy:directed="1"/>
      <edge id="82667" label="RFX5 (GRN) C1orf192" source="82378" target="82483" cy:directed="1"/>
      <edge id="82666" label="RFX5 (GRN) SOX2" source="82378" target="82482" cy:directed="1"/>
      <edge id="82665" label="RFX5 (GRN) GSTA1" source="82378" target="82481" cy:directed="1"/>
      <edge id="82664" label="RFX5 (GRN) TP63" source="82378" target="82479" cy:directed="1"/>
      <edge id="82663" label="RFX5 (GRN) KIAA0319" source="82378" target="82302" cy:directed="1"/>
      <edge id="82662" label="RFX5 (GRN) IQCG" source="82378" target="82301" cy:directed="1"/>
      <edge id="82661" label="RFX5 (GRN) ALDH3A1" source="82378" target="82299" cy:directed="1"/>
      <edge id="82660" label="ARID2 (GRN) C1orf192" source="82377" target="82483" cy:directed="1"/>
      <edge id="82659" label="ARID2 (GRN) SOX2" source="82377" target="82482" cy:directed="1"/>
      <edge id="82658" label="ARID2 (GRN) GSTA1" source="82377" target="82481" cy:directed="1"/>
      <edge id="82657" label="ARID2 (GRN) IQCG" source="82377" target="82301" cy:directed="1"/>
      <edge id="82656" label="ARID2 (GRN) TP63" source="82377" target="82479" cy:directed="1"/>
      <edge id="82655" label="ZBTB33 (GRN) LIMS2" source="82376" target="82454" cy:directed="1"/>
      <edge id="82654" label="ZBTB33 (GRN) ITGB2" source="82376" target="82472" cy:directed="1"/>
      <edge id="82653" label="ZBTB33 (GRN) CD97" source="82376" target="82470" cy:directed="1"/>
      <edge id="82652" label="ZBTB33 (GRN) MYO1F" source="82376" target="82465" cy:directed="1"/>
      <edge id="82651" label="ZBTB33 (GRN) LPCAT1" source="82376" target="82452" cy:directed="1"/>
      <edge id="82650" label="ZBTB33 (GRN) CFB" source="82376" target="82375" cy:directed="1"/>
      <edge id="82649" label="ZBTB33 (GRN) CORO1A" source="82376" target="82456" cy:directed="1"/>
      <edge id="82648" label="ZBTB33 (GRN) POP5" source="82376" target="82274" cy:directed="1"/>
      <edge id="82647" label="ZBTB33 (GRN) ALDH3B1" source="82376" target="82475" cy:directed="1"/>
      <edge id="82646" label="ZBTB33 (GRN) NKX2-1" source="82376" target="82435" cy:directed="1"/>
      <edge id="82645" label="CFB (GCN) ALDH3B1" source="82375" target="82475" cy:directed="1"/>
      <edge id="82644" label="JUN (GRN) TSPY8" source="82374" target="82373" cy:directed="1"/>
      <edge id="82643" label="JUN (GRN) UCP1" source="82374" target="82372" cy:directed="1"/>
      <edge id="82642" label="JUN (GRN) CDH12" source="82374" target="82371" cy:directed="1"/>
      <edge id="82641" label="JUN (GRN) TSPY6P" source="82374" target="82237" cy:directed="1"/>
      <edge id="82640" label="JUN (GRN) HOXB1" source="82374" target="82236" cy:directed="1"/>
      <edge id="82639" label="JUN (GRN) CYP4F2" source="82374" target="82235" cy:directed="1"/>
      <edge id="82638" label="TSPY8 (GCN) TSPY6P" source="82373" target="82237" cy:directed="1"/>
      <edge id="82637" label="UCP1 (GCN) HOXB1" source="82372" target="82236" cy:directed="1"/>
      <edge id="82636" label="CDH12 (GCN) CYP4F2" source="82371" target="82235" cy:directed="1"/>
      <edge id="82635" label="NR2F2 (GRN) PSMA4" source="82370" target="82408" cy:directed="1"/>
      <edge id="82634" label="NR2F2 (GRN) COX5A" source="82370" target="82416" cy:directed="1"/>
      <edge id="82633" label="NR2F2 (GRN) OIP5" source="82370" target="82427" cy:directed="1"/>
      <edge id="82632" label="NR2F2 (GRN) C15orf40" source="82370" target="82412" cy:directed="1"/>
      <edge id="82631" label="NR2F2 (GRN) GTF2A2" source="82370" target="82246" cy:directed="1"/>
      <edge id="82630" label="NR2F2 (GRN) MRPL46" source="82370" target="82245" cy:directed="1"/>
      <edge id="82629" label="NR2F2 (GRN) DSCC1" source="82370" target="82249" cy:directed="1"/>
      <edge id="82628" label="NR2F2 (GRN) POLR3K" source="82370" target="82248" cy:directed="1"/>
      <edge id="82627" label="NR2F2 (GRN) FAM103A1" source="82370" target="82247" cy:directed="1"/>
      <edge id="82626" label="EGR4 (GRN) C1orf192" source="82369" target="82483" cy:directed="1"/>
      <edge id="82625" label="EGR4 (GRN) IQCG" source="82369" target="82301" cy:directed="1"/>
      <edge id="82624" label="EP300 (GRN) C1orf192" source="82368" target="82483" cy:directed="1"/>
      <edge id="82623" label="EP300 (GRN) IQCG" source="82368" target="82301" cy:directed="1"/>
      <edge id="82622" label="MYPOP (GRN) NLRP9" source="82367" target="82445" cy:directed="1"/>
      <edge id="82621" label="MYPOP (GRN) DTD2" source="82367" target="82431" cy:directed="1"/>
      <edge id="82620" label="MYPOP (GRN) SFTA3" source="82367" target="82467" cy:directed="1"/>
      <edge id="82619" label="MYPOP (GRN) SFTPB" source="82367" target="82270" cy:directed="1"/>
      <edge id="82618" label="MYPOP (GRN) MBIP" source="82367" target="82262" cy:directed="1"/>
      <edge id="82617" label="MYPOP (GRN) HHIP" source="82367" target="82291" cy:directed="1"/>
      <edge id="82616" label="NFYC (GRN) C1orf192" source="82366" target="82483" cy:directed="1"/>
      <edge id="82615" label="NFYC (GRN) IQCG" source="82366" target="82301" cy:directed="1"/>
      <edge id="82614" label="TFAP2A (GRN) C1orf192" source="82365" target="82483" cy:directed="1"/>
      <edge id="82613" label="TFAP2A (GRN) IQCG" source="82365" target="82301" cy:directed="1"/>
      <edge id="82612" label="TFAP2C (GRN) C1orf192" source="82364" target="82483" cy:directed="1"/>
      <edge id="82611" label="TFAP2C (GRN) IQCG" source="82364" target="82301" cy:directed="1"/>
      <edge id="82610" label="ARNT (GRN) DTD2" source="82363" target="82431" cy:directed="1"/>
      <edge id="82609" label="ARNT (GRN) MBIP" source="82363" target="82262" cy:directed="1"/>
      <edge id="82608" label="AR (GRN) NLRP9" source="82362" target="82445" cy:directed="1"/>
      <edge id="82607" label="AR (GRN) SFTPB" source="82362" target="82270" cy:directed="1"/>
      <edge id="82606" label="YBX1 (GRN) C1orf192" source="82361" target="82483" cy:directed="1"/>
      <edge id="82605" label="YBX1 (GRN) IQCG" source="82361" target="82301" cy:directed="1"/>
      <edge id="82604" label="NR0B1 (GRN) C1orf192" source="82360" target="82483" cy:directed="1"/>
      <edge id="82603" label="NR0B1 (GRN) IQCG" source="82360" target="82301" cy:directed="1"/>
      <edge id="82602" label="HSF1 (GRN) C15orf40" source="82359" target="82412" cy:directed="1"/>
      <edge id="82601" label="HSF1 (GRN) OIP5" source="82359" target="82427" cy:directed="1"/>
      <edge id="82600" label="HSF1 (GRN) DSCC1" source="82359" target="82249" cy:directed="1"/>
      <edge id="82599" label="HSF1 (GRN) POLR3K" source="82359" target="82248" cy:directed="1"/>
      <edge id="82598" label="HSF1 (GRN) FAM103A1" source="82359" target="82247" cy:directed="1"/>
      <edge id="82597" label="LMO2 (GRN) C1orf192" source="82358" target="82483" cy:directed="1"/>
      <edge id="82596" label="LMO2 (GRN) IQCG" source="82358" target="82301" cy:directed="1"/>
      <edge id="82595" label="TFAP2B (GRN) C1orf192" source="82357" target="82483" cy:directed="1"/>
      <edge id="82594" label="TFAP2B (GRN) IQCG" source="82357" target="82301" cy:directed="1"/>
      <edge id="82593" label="BHLHE40 (GRN) C1orf192" source="82356" target="82483" cy:directed="1"/>
      <edge id="82592" label="BHLHE40 (GRN) IQCG" source="82356" target="82301" cy:directed="1"/>
      <edge id="82591" label="GSC2 (GRN) C1orf192" source="82355" target="82483" cy:directed="1"/>
      <edge id="82590" label="GSC2 (GRN) IQCG" source="82355" target="82301" cy:directed="1"/>
      <edge id="82589" label="MYBL1 (GRN) C1orf192" source="82354" target="82483" cy:directed="1"/>
      <edge id="82588" label="MYBL1 (GRN) IQCG" source="82354" target="82301" cy:directed="1"/>
      <edge id="82587" label="ZBED1 (GRN) C1orf192" source="82353" target="82483" cy:directed="1"/>
      <edge id="82586" label="ZBED1 (GRN) IQCG" source="82353" target="82301" cy:directed="1"/>
      <edge id="82585" label="E2F1 (GRN) NKX2-1" source="82352" target="82435" cy:directed="1"/>
      <edge id="82584" label="E2F1 (GRN) KIAA0408" source="82352" target="82234" cy:directed="1"/>
      <edge id="82583" label="PAX1 (GRN) C1orf192" source="82351" target="82483" cy:directed="1"/>
      <edge id="82582" label="PAX1 (GRN) IQCG" source="82351" target="82301" cy:directed="1"/>
      <edge id="82581" label="TFCP2L1 (GRN) C1orf192" source="82350" target="82483" cy:directed="1"/>
      <edge id="82580" label="TFCP2L1 (GRN) IQCG" source="82350" target="82301" cy:directed="1"/>
      <edge id="82579" label="SCRT1 (GRN) C1orf192" source="82349" target="82483" cy:directed="1"/>
      <edge id="82578" label="SCRT1 (GRN) IQCG" source="82349" target="82301" cy:directed="1"/>
      <edge id="82577" label="CLOCK (GRN) C1orf192" source="82348" target="82483" cy:directed="1"/>
      <edge id="82576" label="CLOCK (GRN) IQCG" source="82348" target="82301" cy:directed="1"/>
      <edge id="82575" label="CTCF (GRN) C1orf192" source="82347" target="82483" cy:directed="1"/>
      <edge id="82574" label="CTCF (GRN) IQCG" source="82347" target="82301" cy:directed="1"/>
      <edge id="82573" label="MYOD1 (GRN) C1orf192" source="82346" target="82483" cy:directed="1"/>
      <edge id="82572" label="MYOD1 (GRN) IQCG" source="82346" target="82301" cy:directed="1"/>
      <edge id="82571" label="ZBTB7C (GRN) C1orf192" source="82345" target="82483" cy:directed="1"/>
      <edge id="82570" label="ZBTB7C (GRN) IQCG" source="82345" target="82301" cy:directed="1"/>
      <edge id="82569" label="REST (GRN) C1orf192" source="82344" target="82483" cy:directed="1"/>
      <edge id="82568" label="REST (GRN) IQCG" source="82344" target="82301" cy:directed="1"/>
      <edge id="82567" label="MZF1 (GRN) C1orf192" source="82343" target="82483" cy:directed="1"/>
      <edge id="82566" label="MZF1 (GRN) IQCG" source="82343" target="82301" cy:directed="1"/>
      <edge id="82565" label="KLF4 (GRN) C1orf192" source="82342" target="82483" cy:directed="1"/>
      <edge id="82564" label="KLF4 (GRN) IQCG" source="82342" target="82301" cy:directed="1"/>
      <edge id="82563" label="HIVEP2 (GRN) C1orf192" source="82341" target="82483" cy:directed="1"/>
      <edge id="82562" label="HIVEP2 (GRN) IQCG" source="82341" target="82301" cy:directed="1"/>
      <edge id="82561" label="GLIS3 (GRN) C1orf192" source="82340" target="82483" cy:directed="1"/>
      <edge id="82560" label="GLIS3 (GRN) IQCG" source="82340" target="82301" cy:directed="1"/>
      <edge id="82559" label="KLF3 (GRN) C1orf192" source="82339" target="82483" cy:directed="1"/>
      <edge id="82558" label="KLF3 (GRN) IQCG" source="82339" target="82301" cy:directed="1"/>
      <edge id="82557" label="KLF8 (GRN) C1orf192" source="82338" target="82483" cy:directed="1"/>
      <edge id="82556" label="KLF8 (GRN) IQCG" source="82338" target="82301" cy:directed="1"/>
      <edge id="82555" label="RBPJ (GRN) C1orf192" source="82337" target="82483" cy:directed="1"/>
      <edge id="82554" label="RBPJ (GRN) IQCG" source="82337" target="82301" cy:directed="1"/>
      <edge id="82553" label="TP73 (GRN) C1orf192" source="82336" target="82483" cy:directed="1"/>
      <edge id="82552" label="TP73 (GRN) IQCG" source="82336" target="82301" cy:directed="1"/>
      <edge id="82551" label="GLIS2 (GRN) C1orf192" source="82335" target="82483" cy:directed="1"/>
      <edge id="82550" label="GLIS2 (GRN) IQCG" source="82335" target="82301" cy:directed="1"/>
      <edge id="82549" label="EGR2 (GRN) C1orf192" source="82334" target="82483" cy:directed="1"/>
      <edge id="82548" label="EGR2 (GRN) IQCG" source="82334" target="82301" cy:directed="1"/>
      <edge id="82547" label="ELK1 (GRN) SFTA3" source="82333" target="82467" cy:directed="1"/>
      <edge id="82546" label="ELK1 (GRN) HHIP" source="82333" target="82291" cy:directed="1"/>
      <edge id="82545" label="RUNX3 (GRN) C1orf192" source="82332" target="82483" cy:directed="1"/>
      <edge id="82544" label="RUNX3 (GRN) IQCG" source="82332" target="82301" cy:directed="1"/>
      <edge id="82543" label="ID4 (GRN) C1orf192" source="82331" target="82483" cy:directed="1"/>
      <edge id="82542" label="ID4 (GRN) IQCG" source="82331" target="82301" cy:directed="1"/>
      <edge id="82541" label="KLF1 (GRN) C1orf192" source="82330" target="82483" cy:directed="1"/>
      <edge id="82540" label="KLF1 (GRN) IQCG" source="82330" target="82301" cy:directed="1"/>
      <edge id="82539" label="NR5A2 (GRN) C1orf192" source="82329" target="82483" cy:directed="1"/>
      <edge id="82538" label="NR5A2 (GRN) IQCG" source="82329" target="82301" cy:directed="1"/>
      <edge id="82537" label="SMAD2 (GRN) C1orf192" source="82328" target="82483" cy:directed="1"/>
      <edge id="82536" label="SMAD2 (GRN) IQCG" source="82328" target="82301" cy:directed="1"/>
      <edge id="82535" label="SREBF1 (GRN) C1orf192" source="82327" target="82483" cy:directed="1"/>
      <edge id="82534" label="SREBF1 (GRN) IQCG" source="82327" target="82301" cy:directed="1"/>
      <edge id="82533" label="ZIC4 (GRN) C1orf192" source="82326" target="82483" cy:directed="1"/>
      <edge id="82532" label="ZIC4 (GRN) IQCG" source="82326" target="82301" cy:directed="1"/>
      <edge id="82531" label="ENO1 (GRN) C1orf192" source="82325" target="82483" cy:directed="1"/>
      <edge id="82530" label="ENO1 (GRN) IQCG" source="82325" target="82301" cy:directed="1"/>
      <edge id="82529" label="ARNT2 (GRN) C1orf192" source="82324" target="82483" cy:directed="1"/>
      <edge id="82528" label="ARNT2 (GRN) IQCG" source="82324" target="82301" cy:directed="1"/>
      <edge id="82527" label="HAND2 (GRN) C1orf192" source="82323" target="82483" cy:directed="1"/>
      <edge id="82526" label="HAND2 (GRN) IQCG" source="82323" target="82301" cy:directed="1"/>
      <edge id="82525" label="ESRRA (GRN) C1orf192" source="82322" target="82483" cy:directed="1"/>
      <edge id="82524" label="ESRRA (GRN) IQCG" source="82322" target="82301" cy:directed="1"/>
      <edge id="82523" label="GMEB2 (GRN) C1orf192" source="82321" target="82483" cy:directed="1"/>
      <edge id="82522" label="GMEB2 (GRN) IQCG" source="82321" target="82301" cy:directed="1"/>
      <edge id="82521" label="HIF1A (GRN) C1orf192" source="82320" target="82483" cy:directed="1"/>
      <edge id="82520" label="HIF1A (GRN) IQCG" source="82320" target="82301" cy:directed="1"/>
      <edge id="82519" label="NFIX (GRN) C1orf192" source="82319" target="82483" cy:directed="1"/>
      <edge id="82518" label="NFIX (GRN) IQCG" source="82319" target="82301" cy:directed="1"/>
      <edge id="82517" label="ZBTB7A (GRN) C1orf192" source="82318" target="82483" cy:directed="1"/>
      <edge id="82516" label="ZBTB7A (GRN) IQCG" source="82318" target="82301" cy:directed="1"/>
      <edge id="82515" label="ZHX1 (GRN) C1orf192" source="82317" target="82483" cy:directed="1"/>
      <edge id="82514" label="ZHX1 (GRN) IQCG" source="82317" target="82301" cy:directed="1"/>
      <edge id="82513" label="FOXK1 (GRN) C1orf192" source="82316" target="82483" cy:directed="1"/>
      <edge id="82512" label="FOXK1 (GRN) IQCG" source="82316" target="82301" cy:directed="1"/>
      <edge id="82511" label="TP53 (GRN) C1orf192" source="82315" target="82483" cy:directed="1"/>
      <edge id="82510" label="TP53 (GRN) IQCG" source="82315" target="82301" cy:directed="1"/>
      <edge id="82509" label="ATOH8 (GRN) C1orf192" source="82314" target="82483" cy:directed="1"/>
      <edge id="82508" label="ATOH8 (GRN) IQCG" source="82314" target="82301" cy:directed="1"/>
      <edge id="82507" label="BHLHE41 (GRN) C1orf192" source="82313" target="82483" cy:directed="1"/>
      <edge id="82506" label="BHLHE41 (GRN) IQCG" source="82313" target="82301" cy:directed="1"/>
      <edge id="82505" label="MLXIPL (GRN) C1orf192" source="82312" target="82483" cy:directed="1"/>
      <edge id="82504" label="MLXIPL (GRN) IQCG" source="82312" target="82301" cy:directed="1"/>
      <edge id="82503" label="HIC2 (GRN) C1orf192" source="82311" target="82483" cy:directed="1"/>
      <edge id="82502" label="HIC2 (GRN) IQCG" source="82311" target="82301" cy:directed="1"/>
      <edge id="82501" label="ZIC1 (GRN) C1orf192" source="82310" target="82483" cy:directed="1"/>
      <edge id="82500" label="ZIC1 (GRN) IQCG" source="82310" target="82301" cy:directed="1"/>
      <edge id="82499" label="ASCL1 (GRN) C1orf192" source="82309" target="82483" cy:directed="1"/>
      <edge id="82498" label="ASCL1 (GRN) IQCG" source="82309" target="82301" cy:directed="1"/>
      <edge id="82497" label="ZBTB4 (GRN) C1orf192" source="82308" target="82483" cy:directed="1"/>
      <edge id="82496" label="ZBTB4 (GRN) IQCG" source="82308" target="82301" cy:directed="1"/>
      <edge id="82495" label="ZNF202 (GRN) C1orf192" source="82307" target="82483" cy:directed="1"/>
      <edge id="82494" label="ZNF202 (GRN) IQCG" source="82307" target="82301" cy:directed="1"/>
      <edge id="82493" label="PROX1 (GRN) C1orf192" source="82306" target="82483" cy:directed="1"/>
      <edge id="82492" label="PROX1 (GRN) IQCG" source="82306" target="82301" cy:directed="1"/>
      <edge id="82491" label="GLIS1 (GRN) C1orf192" source="82305" target="82483" cy:directed="1"/>
      <edge id="82490" label="GLIS1 (GRN) IQCG" source="82305" target="82301" cy:directed="1"/>
      <edge id="82489" label="ETV2 (GRN) LPCAT1" source="82304" target="82452" cy:directed="1"/>
      <edge id="82488" label="ETV2 (GRN) NKX2-1" source="82304" target="82435" cy:directed="1"/>
    </graph>
  </att>
</graph>
