# Supplementary material
Source: publisher figshare collection journal article supplement (https://springernature.figshare.com/ndownloader/files/35041376)
Supplement: Supplementary file 1 [file 35041376 › CytoscapeSession-2021_06_28-02_05/properties/groupSettings.props]

#Written by: Cytoscape's PropertiesWriterImpl
#Mon Jun 28 02:05:20 EDT 2021
