# Supplementary material
Source: publisher figshare collection journal article supplement (https://springernature.figshare.com/ndownloader/files/35041376)
Supplement: Supplementary file 1 [file 35041376 › CytoscapeSession-2021_06_28-02_05/tables/35-lung_GRN4TCGA_normal.txt/SHARED_ATTRS-org.cytoscape.model.CyEdge-35+shared+edge.cytable]

"CyCSV-Version","1"
"SUID","shared interaction","shared name"
"java.lang.Long","java.lang.String","java.lang.String"
"","",""
"35 shared edge",""
"74","GRN","ZBTB33 (GRN) SLC34A2"
"75","GRN","ZBTB33 (GRN) LGI3"
"76","GCN","SLC34A2 (GCN) LGI3"
