# Supplementary material
Source: publisher figshare collection journal article supplement (https://springernature.figshare.com/ndownloader/files/35041376)
Supplement: Supplementary file 1 [file 35041376 › CytoscapeSession-2021_06_28-02_05/tables/61-lung_GRN4TCGA_normal.txt/HIDDEN-org.cytoscape.model.CyNetwork-61+hidden+network.cytable]

"CyCSV-Version","1"
"SUID","layoutAlgorithm"
"java.lang.Long","java.lang.String"
"",""
"61 hidden network",""
"61","Prefuse Force Directed OpenCL Layout"
