# Supplementary material
Source: publisher figshare collection journal article supplement (https://springernature.figshare.com/ndownloader/files/35041376)
Supplement: Supplementary file 1 [file 35041376 › CytoscapeSession-2021_06_28-02_05/tables/61-lung_GRN4TCGA_normal.txt/LOCAL_ATTRS-org.cytoscape.model.CyNetwork-lung_GRN4TCGA_normal.txt+default+network.cytable]

"CyCSV-Version","1"
"SUID","__Annotations","name","selected"
"java.lang.Long","java.util.List<java.lang.String>","java.lang.String","java.lang.Boolean"
"","mutable","",""
"lung_GRN4TCGA_normal.txt default network",""
"61","","lung_GRN4TCGA_normal.txt","false"
