# Supplementary material
Source: publisher figshare collection journal article supplement (https://springernature.figshare.com/ndownloader/files/35041376)
Supplement: Supplementary file 1 [file 35041376 › CytoscapeSession-2021_06_28-02_05/tables/61-lung_GRN4TCGA_normal.txt/LOCAL_ATTRS-org.cytoscape.model.CyNode-lung_GRN4TCGA_normal.txt+default+node.cytable]

"CyCSV-Version","1"
"SUID","name","selected","Type"
"java.lang.Long","java.lang.String","java.lang.Boolean","java.lang.String"
"","","","mutable"
"lung_GRN4TCGA_normal.txt default node",""
"71","ZBTB33","false","TF"
"72","SLC34A2","false","GCN_NODE"
"73","LGI3","false","GCN_NODE"
