# Supplementary material
Source: publisher figshare collection journal article supplement (https://springernature.figshare.com/ndownloader/files/35041376)
Supplement: Supplementary file 1 [file 35041376 › CytoscapeSession-2021_06_28-02_05/tables/77-77/SHARED_ATTRS-org.cytoscape.model.CyEdge-77+shared+edge.cytable]

CyCSV-Version	1
SUID	Class	Cluster_Index	Cluster_Size	p_value	r_squared	rank	Samples	shared interaction	shared name	Similarity_Score	Test_Name
java.lang.Long	java.lang.String	java.lang.Integer	java.lang.Integer	java.lang.Double	java.lang.Integer	java.lang.Integer	java.lang.Double	java.lang.String	java.lang.String	java.lang.Double	java.lang.String
	mutable	mutable	mutable	mutable	mutable	mutable	mutable			mutable	mutable
77 shared edge
66395	Tissue	3	257	3.933E-16	="NA"	1	Infinity			0.9991	Tissue__GTEx_normal
66393	Tissue	1	33	1.191E-7	="NA"	1	Infinity			0.8686	Tissue__TCGA-NORMAL
66355	Tissue	1	33	1.012E-6	="NA"	1	Infinity			0.9987	Tissue__TCGA-LUSC
66352	Tissue	1	355	3.122E-8	="NA"	1	Infinity			0.9146	Tissue__TCGA-LUAD
66351	Tissue	1	94	6.175E-6	="NA"	1	Infinity			0.999	Tissue__TCGA-LUSC
66350	Tissue	1	353	2.635E-7	="NA"	2	Infinity			0.8784	Tissue__TCGA-LUAD
66349	Tissue	2	61	1.439E-4	="NA"	2	Infinity			0.9998	Tissue__TCGA-LUSC
66348	Tissue	1	319	3.529E-4	="NA"	2	Infinity			0.8657	Tissue__TCGA-NORMAL
66110	Tissue	1	33	3.933E-16	="NA"	2	Infinity			0.9495	Tissue__GTEx_normal
66107	Tissue	1	420	2.635E-7	="NA"	3	Infinity			0.8702	Tissue__TCGA-LUAD
66089	Tissue	1	436	6.175E-6	="NA"	3	Infinity			0.9594	Tissue__TCGA-LUSC
66076	Tissue	1	51	6.028E-5	="NA"	3	Infinity			0.9989	Tissue__GTEx_normal
66075	Tissue	1	271	1.579E-8	="NA"	3	Infinity			0.919	Tissue__TCGA-LUSC
66063	Tissue	1	304	3.529E-4	="NA"	3	Infinity			0.8606	Tissue__TCGA-NORMAL
65735	Tissue	1	444	6.028E-5	="NA"	4	Infinity			0.9464	Tissue__GTEx_normal
65722	Tissue	1	310	3.529E-4	="NA"	4	Infinity			0.852	Tissue__TCGA-NORMAL
65498	Tissue	2	44	1.439E-4	="NA"	4	Infinity			0.9908	Tissue__TCGA-LUSC
65496	Tissue	1	34	8.554E-4	="NA"	4	Infinity			0.9658	Tissue__TCGA-LUAD
65494	Tissue	1	31	3.211E-5	="NA"	5	Infinity			0.9419	Tissue__TCGA-LUSC
65493	Tissue	1	42	1.439E-4	="NA"	5	Infinity			0.9692	Tissue__TCGA-LUSC
65721	Tissue	1	323	3.529E-4	="NA"	5	Infinity			0.8438	Tissue__TCGA-NORMAL
65474	Tissue	1	58	2.29E-4	="NA"	5	Infinity			-0.9006	Tissue__TCGA-LUAD
65417	Tissue	1	300	2.592E-4	="NA"	5	Infinity			0.938	Tissue__GTEx_normal
65409	Tissue	1	495	1.833E-6	="NA"	6	Infinity			0.86	Tissue__TCGA-LUAD
65394	Tissue	1	35	5.094E-12	="NA"	6	Infinity			-0.8496	Tissue__TCGA-LUSC
65393	Tissue	1	323	3.529E-4	="NA"	6	Infinity			0.8284	Tissue__TCGA-NORMAL
65343	Tissue	1	611	9.85E-4	="NA"	6	Infinity			0.9349	Tissue__GTEx_normal
64688	Tissue	1	445	2.635E-7	="NA"	6	Infinity			0.8552	Tissue__TCGA-LUAD
64648	Tissue	1	125	3.529E-4	="NA"	7	Infinity			0.827	Tissue__TCGA-NORMAL
64621	Tissue	1	608	3.211E-5	="NA"	7	Infinity			0.9055	Tissue__TCGA-LUSC
64617	Tissue	2	445	5.334E-5	="NA"	7	Infinity			0.8614	Tissue__TCGA-LUAD
64524	Tissue	1	606	9.85E-4	="NA"	7	Infinity			0.9332	Tissue__GTEx_normal
63924	Tissue	2	434	2.635E-7	="NA"	8	Infinity			0.849	Tissue__TCGA-LUAD
66257	Tissue	1	347	3.529E-4	="NA"	8	Infinity			0.8218	Tissue__TCGA-NORMAL
63826	Tissue	2	501	1.071E-5	="NA"	8	Infinity			0.8545	Tissue__TCGA-LUAD
65342	Tissue	1	608	9.85E-4	="NA"	8	Infinity			0.9327	Tissue__GTEx_normal
63512	Tissue	2	32	5.608E-4	="NA"	8	Infinity			0.9193	Tissue__TCGA-LUSC
63496	Tissue	1	568	8.554E-4	="NA"	9	Infinity			0.8542	Tissue__TCGA-LUAD
63463	Tissue	1	321	3.529E-4	="NA"	9	Infinity			0.8186	Tissue__TCGA-NORMAL
63260	Tissue	1	47	3.211E-5	="NA"	9	Infinity			0.8866	Tissue__TCGA-LUSC
65416	Tissue	1	308	9.85E-4	="NA"	9	Infinity			0.9289	Tissue__GTEx_normal
63923	Tissue	1	602	6.175E-6	="NA"	10	Infinity			0.8549	Tissue__TCGA-LUSC
63238	Tissue	1	31	5.608E-4	="NA"	10	Infinity			0.9024	Tissue__TCGA-LUSC
63236	Tissue	1	418	2.635E-7	="NA"	10	Infinity			0.838	Tissue__TCGA-LUAD
65720	Tissue	1	266	5.941E-5	="NA"	10	Infinity			0.813	Tissue__TCGA-NORMAL
65719	Tissue	1	355	3.529E-4	="NA"	10	Infinity			-0.815	Tissue__TCGA-NORMAL
65341	Tissue	1	594	9.85E-4	="NA"	10	Infinity			0.928	Tissue__GTEx_normal
62864	Tissue	2	59	3.211E-5	="NA"	10	Infinity			0.8782	Tissue__TCGA-LUSC
62191	Tissue	1	431	6.028E-5	="NA"	11	Infinity			0.9265	Tissue__GTEx_normal
62190	Tissue	1	46	1.66E-13	="NA"	11	Infinity			-0.8103	Tissue__TCGA-LUSC
65340	Tissue	1	590	2.592E-4	="NA"	11	Infinity			0.9269	Tissue__GTEx_normal
61950	Tissue	1	549	1.071E-5	="NA"	11	Infinity			0.8393	Tissue__TCGA-LUAD
66062	Tissue	1	337	3.529E-4	="NA"	11	Infinity			0.8122	Tissue__TCGA-NORMAL
61861	Tissue	1	59	5.608E-4	="NA"	11	Infinity			0.887	Tissue__TCGA-LUSC
61860	Tissue	1	632	9.85E-4	="NA"	11	Infinity			0.9274	Tissue__GTEx_normal
61601	Tissue	1	581	8.554E-4	="NA"	11	Infinity			0.8433	Tissue__TCGA-LUAD
63258	Tissue	1	62	3.211E-5	="NA"	12	Infinity			0.845	Tissue__TCGA-LUSC
65731	Tissue	1	296	1.236E-5	="NA"	12	Infinity			0.9237	Tissue__GTEx_normal
61415	Tissue	1	44	5.608E-4	="NA"	12	Infinity			0.8863	Tissue__TCGA-LUSC
66256	Tissue	1	348	3.529E-4	="NA"	12	Infinity			0.8118	Tissue__TCGA-NORMAL
61090	Tissue	1	57	1.833E-6	="NA"	12	Infinity			-0.8287	Tissue__TCGA-LUAD
61073	Tissue	1	40	2.29E-4	="NA"	12	Infinity			-0.8411	Tissue__TCGA-LUAD
61072	Tissue	1	518	8.554E-4	="NA"	12	Infinity			0.8428	Tissue__TCGA-LUAD
61048	Tissue	1	37	8.631E-6	="NA"	13	Infinity			-0.8051	Tissue__TCGA-NORMAL
61047	Tissue	1	442	1.012E-6	="NA"	13	Infinity			0.829	Tissue__TCGA-LUSC
66108	Tissue	3	74	6.175E-6	="NA"	13	Infinity			0.8348	Tissue__TCGA-LUSC
61046	Tissue	1	325	9.85E-4	="NA"	13	Infinity			0.9258	Tissue__GTEx_normal
61044	Tissue	1	320	3.529E-4	="NA"	13	Infinity			0.8112	Tissue__TCGA-NORMAL
60962	Tissue	1	562	1.071E-5	="NA"	13	Infinity			0.8234	Tissue__TCGA-LUAD
63744	Tissue	1	610	5.334E-5	="NA"	14	Infinity			0.8221	Tissue__TCGA-LUAD
60907	Tissue	1	49	6.175E-6	="NA"	14	Infinity			0.8236	Tissue__TCGA-LUSC
60905	Tissue	1	317	3.529E-4	="NA"	14	Infinity			0.81	Tissue__TCGA-NORMAL
60883	Tissue	1	437	1.071E-5	="NA"	14	Infinity			0.8194	Tissue__TCGA-LUAD
60800	Tissue	1	598	9.85E-4	="NA"	14	Infinity			0.9228	Tissue__GTEx_normal
61213	Tissue	1	308	3.529E-4	="NA"	15	Infinity			0.7964	Tissue__TCGA-NORMAL
60592	Tissue	1	182	5.608E-4	="NA"	15	Infinity			0.8406	Tissue__TCGA-LUSC
65339	Tissue	1	599	9.85E-4	="NA"	15	Infinity			0.9226	Tissue__GTEx_normal
65338	Tissue	1	567	2.592E-4	="NA"	15	Infinity			0.9208	Tissue__GTEx_normal
60391	Tissue	1	294	5.941E-5	="NA"	15	Infinity			0.7837	Tissue__TCGA-NORMAL
60378	Tissue	1	554	5.334E-5	="NA"	15	Infinity			0.8123	Tissue__TCGA-LUAD
60360	Tissue	1	646	1.439E-4	="NA"	16	Infinity			0.8251	Tissue__TCGA-LUSC
61414	Tissue	1	47	5.334E-5	="NA"	16	Infinity			0.8098	Tissue__TCGA-LUAD
63743	Tissue	1	554	1.071E-5	="NA"	16	Infinity			0.8095	Tissue__TCGA-LUAD
60243	Tissue	1	253	2.29E-4	="NA"	16	Infinity			-0.812	Tissue__TCGA-LUAD
63462	Tissue	1	326	3.529E-4	="NA"	16	Infinity			0.7812	Tissue__TCGA-NORMAL
61859	Tissue	1	622	9.85E-4	="NA"	16	Infinity			0.9206	Tissue__GTEx_normal
60023	Tissue	1	50	3.211E-5	="NA"	16	Infinity			0.8224	Tissue__TCGA-LUSC
60020	Tissue	1	38	3.211E-5	="NA"	17	Infinity			-0.8085	Tissue__TCGA-LUSC
60001	Tissue	1	432	2.592E-4	="NA"	17	Infinity			0.9194	Tissue__GTEx_normal
59959	Tissue	1	430	1.833E-6	="NA"	17	Infinity			0.798	Tissue__TCGA-LUAD
59874	Tissue	1	415	2.635E-7	="NA"	17	Infinity			0.7871	Tissue__TCGA-LUAD
59781	Tissue	1	33	3.529E-4	="NA"	17	Infinity			-0.7791	Tissue__TCGA-NORMAL
64523	Tissue	1	635	9.85E-4	="NA"	17	Infinity			0.9203	Tissue__GTEx_normal
61212	Tissue	1	319	3.529E-4	="NA"	18	Infinity			0.7747	Tissue__TCGA-NORMAL
59780	Tissue	1	92	1.393E-7	="NA"	18	Infinity			0.8072	Tissue__TCGA-LUSC
64522	Tissue	1	597	2.592E-4	="NA"	18	Infinity			0.9188	Tissue__GTEx_normal
65415	Tissue	1	285	9.85E-4	="NA"	18	Infinity			0.9194	Tissue__GTEx_normal
59662	Tissue	1	378	3.122E-8	="NA"	18	Infinity			0.783	Tissue__TCGA-LUAD
59652	Tissue	1	31	3.122E-8	="NA"	19	Infinity			-0.7734	Tissue__TCGA-LUAD
59651	Tissue	2	69	1.439E-4	="NA"	19	Infinity			0.8083	Tissue__TCGA-LUSC
59633	Tissue	1	46	5.901E-10	="NA"	19	Infinity			-0.9144	Tissue__GTEx_normal
59582	Tissue	1	91	8.554E-4	="NA"	19	Infinity			0.7989	Tissue__TCGA-LUAD
66061	Tissue	1	351	3.529E-4	="NA"	19	Infinity			0.7731	Tissue__TCGA-NORMAL
65473	Tissue	1	45	1.071E-5	="NA"	19	Infinity			-0.7834	Tissue__TCGA-LUAD
59466	Tissue	1	32	1.012E-6	="NA"	19	Infinity			0.7976	Tissue__TCGA-LUSC
60019	Tissue	1	106	1.012E-6	="NA"	20	Infinity			0.7928	Tissue__TCGA-LUSC
59434	Tissue	1	262	5.334E-5	="NA"	20	Infinity			-0.7743	Tissue__TCGA-LUAD
59282	Tissue	1	320	3.529E-4	="NA"	20	Infinity			-0.7727	Tissue__TCGA-NORMAL
60799	Tissue	1	620	9.85E-4	="NA"	20	Infinity			0.9187	Tissue__GTEx_normal
59206	Tissue	1	746	5.608E-4	="NA"	21	Infinity			0.8077	Tissue__TCGA-LUSC
66060	Tissue	1	344	3.529E-4	="NA"	21	Infinity			0.7722	Tissue__TCGA-NORMAL
60798	Tissue	1	619	9.85E-4	="NA"	21	Infinity			0.9179	Tissue__GTEx_normal
59197	Tissue	1	31	2.635E-7	="NA"	21	Infinity			0.7637	Tissue__TCGA-LUAD
59195	Tissue	1	31	5.094E-12	="NA"	22	Infinity			0.7855	Tissue__TCGA-LUSC
65730	Tissue	1	407	9.85E-4	="NA"	22	Infinity			0.9174	Tissue__GTEx_normal
59192	Tissue	2	715	5.608E-4	="NA"	22	Infinity			0.8073	Tissue__TCGA-LUSC
59136	Tissue	1	87	1.071E-5	="NA"	22	Infinity			0.7679	Tissue__TCGA-LUAD
59030	Tissue	1	248	5.334E-5	="NA"	22	Infinity			-0.7726	Tissue__TCGA-LUAD
59281	Tissue	1	307	3.529E-4	="NA"	22	Infinity			0.7701	Tissue__TCGA-NORMAL
61858	Tissue	1	632	9.85E-4	="NA"	22	Infinity			0.9174	Tissue__GTEx_normal
58531	Tissue	1	31	1.833E-6	="NA"	23	Infinity			-0.7617	Tissue__TCGA-LUAD
66088	Tissue	1	434	1.012E-6	="NA"	23	Infinity			0.7891	Tissue__TCGA-LUSC
59135	Tissue	1	79	1.071E-5	="NA"	23	Infinity			0.7626	Tissue__TCGA-LUAD
65337	Tissue	1	601	9.85E-4	="NA"	23	Infinity			0.9166	Tissue__GTEx_normal
66059	Tissue	1	334	3.529E-4	="NA"	23	Infinity			0.7665	Tissue__TCGA-NORMAL
58099	Tissue	1	342	3.529E-4	="NA"	24	Infinity			-0.7651	Tissue__TCGA-NORMAL
58083	Tissue	1	242	5.608E-4	="NA"	24	Infinity			-0.793	Tissue__TCGA-LUSC
63156	Tissue	1	601	9.85E-4	="NA"	24	Infinity			0.9159	Tissue__GTEx_normal
65408	Tissue	1	401	3.122E-8	="NA"	24	Infinity			0.7596	Tissue__TCGA-LUAD
58082	Tissue	1	82	1.439E-4	="NA"	24	Infinity			-0.7921	Tissue__TCGA-LUSC
65718	Tissue	1	288	5.941E-5	="NA"	24	Infinity			0.7629	Tissue__TCGA-NORMAL
59029	Tissue	1	449	2.29E-4	="NA"	24	Infinity			-0.7631	Tissue__TCGA-LUAD
64521	Tissue	1	607	9.85E-4	="NA"	24	Infinity			0.9159	Tissue__GTEx_normal
58069	Tissue	1	33	6.175E-6	="NA"	25	Infinity			-0.7871	Tissue__TCGA-LUSC
58068	Tissue	1	362	1.006E-10	="NA"	25	Infinity			0.78	Tissue__TCGA-LUSC
58042	Tissue	2	597	9.85E-4	="NA"	25	Infinity			0.9149	Tissue__GTEx_normal
65717	Tissue	1	303	5.941E-5	="NA"	25	Infinity			0.7606	Tissue__TCGA-NORMAL
64687	Tissue	1	470	1.071E-5	="NA"	25	Infinity			0.7611	Tissue__TCGA-LUAD
66106	Tissue	1	668	5.608E-4	="NA"	26	Infinity			0.7915	Tissue__TCGA-LUSC
61876	Tissue	1	285	5.941E-5	="NA"	26	Infinity			0.7602	Tissue__TCGA-NORMAL
64520	Tissue	1	621	9.85E-4	="NA"	26	Infinity			0.9147	Tissue__GTEx_normal
57636	Tissue	2	469	2.29E-4	="NA"	26	Infinity			0.7612	Tissue__TCGA-LUAD
57169	Tissue	1	93	1.393E-7	="NA"	27	Infinity			0.7826	Tissue__TCGA-LUSC
65407	Tissue	2	531	1.833E-6	="NA"	27	Infinity			0.7589	Tissue__TCGA-LUAD
63721	Tissue	1	629	9.85E-4	="NA"	27	Infinity			0.9145	Tissue__GTEx_normal
56770	Tissue	1	48	3.211E-5	="NA"	27	Infinity			0.7857	Tissue__TCGA-LUSC
56769	Tissue	1	113	1.012E-6	="NA"	27	Infinity			0.7843	Tissue__TCGA-LUSC
56740	Tissue	1	36	5.608E-4	="NA"	27	Infinity			-0.7905	Tissue__TCGA-LUSC
56738	Tissue	1	268	5.941E-5	="NA"	27	Infinity			0.7541	Tissue__TCGA-NORMAL
64955	Tissue	1	615	9.85E-4	="NA"	28	Infinity			0.9136	Tissue__GTEx_normal
56690	Tissue	1	655	5.608E-4	="NA"	28	Infinity			0.7876	Tissue__TCGA-LUSC
65716	Tissue	1	317	5.941E-5	="NA"	28	Infinity			0.7524	Tissue__TCGA-NORMAL
56664	Tissue	1	279	2.29E-4	="NA"	28	Infinity			-0.7593	Tissue__TCGA-LUAD
66080	Tissue	1	385	3.211E-5	="NA"	29	Infinity			0.7814	Tissue__TCGA-LUSC
63720	Tissue	1	632	9.85E-4	="NA"	29	Infinity			0.9131	Tissue__GTEx_normal
56648	Tissue	1	298	5.334E-5	="NA"	29	Infinity			-0.7578	Tissue__TCGA-LUAD
56547	Tissue	1	31	1.071E-5	="NA"	29	Infinity			0.756	Tissue__TCGA-LUAD
56545	Tissue	1	314	3.529E-4	="NA"	29	Infinity			0.7521	Tissue__TCGA-NORMAL
56417	Tissue	1	238	5.941E-5	="NA"	30	Infinity			0.7499	Tissue__TCGA-NORMAL
56405	Tissue	1	33	5.094E-12	="NA"	30	Infinity			0.7674	Tissue__TCGA-LUSC
56404	Tissue	1	332	3.529E-4	="NA"	30	Infinity			0.7504	Tissue__TCGA-NORMAL
61857	Tissue	1	619	9.85E-4	="NA"	30	Infinity			0.913	Tissue__GTEx_normal
61600	Tissue	2	433	1.833E-6	="NA"	30	Infinity			0.7528	Tissue__TCGA-LUAD
56129	Tissue	1	71	1.012E-6	="NA"	31	Infinity			-0.7724	Tissue__TCGA-LUSC
62188	Tissue	1	612	9.85E-4	="NA"	31	Infinity			0.9127	Tissue__GTEx_normal
56127	Tissue	1	59	1.833E-6	="NA"	31	Infinity			-0.7496	Tissue__TCGA-LUAD
65715	Tissue	1	322	3.529E-4	="NA"	31	Infinity			0.7496	Tissue__TCGA-NORMAL
63719	Tissue	1	620	9.85E-4	="NA"	31	Infinity			0.9127	Tissue__GTEx_normal
66347	Tissue	1	282	5.941E-5	="NA"	31	Infinity			0.7445	Tissue__TCGA-NORMAL
65472	Tissue	1	61	5.334E-5	="NA"	31	Infinity			0.7541	Tissue__TCGA-LUAD
55826	Tissue	1	609	1.439E-4	="NA"	32	Infinity			0.7796	Tissue__TCGA-LUSC
66255	Tissue	1	319	3.529E-4	="NA"	32	Infinity			0.7435	Tissue__TCGA-NORMAL
65336	Tissue	1	616	9.85E-4	="NA"	32	Infinity			0.9117	Tissue__GTEx_normal
60236	Tissue	1	611	9.85E-4	="NA"	32	Infinity			0.9117	Tissue__GTEx_normal
59196	Tissue	1	39	1.833E-6	="NA"	32	Infinity			-0.7421	Tissue__TCGA-LUAD
55655	Tissue	1	44	1.436E-9	="NA"	33	Infinity			-0.7643	Tissue__TCGA-LUSC
55652	Tissue	1	50	6.175E-6	="NA"	33	Infinity			-0.7697	Tissue__TCGA-LUSC
55649	Tissue	1	60	5.094E-12	="NA"	33	Infinity			0.7626	Tissue__TCGA-LUSC
65335	Tissue	1	582	2.592E-4	="NA"	33	Infinity			0.91	Tissue__GTEx_normal
55517	Tissue	1	335	3.529E-4	="NA"	33	Infinity			0.7429	Tissue__TCGA-NORMAL
65471	Tissue	1	91	1.833E-6	="NA"	33	Infinity			-0.7389	Tissue__TCGA-LUAD
60797	Tissue	1	615	9.85E-4	="NA"	33	Infinity			0.9106	Tissue__GTEx_normal
54896	Tissue	1	160	5.608E-4	="NA"	34	Infinity			0.7795	Tissue__TCGA-LUSC
54894	Tissue	1	35	1.833E-6	="NA"	34	Infinity			-0.7367	Tissue__TCGA-LUAD
66346	Tissue	1	320	3.529E-4	="NA"	34	Infinity			0.7416	Tissue__TCGA-NORMAL
54893	Tissue	1	53	8.554E-4	="NA"	34	Infinity			0.7443	Tissue__TCGA-LUAD
54886	Tissue	1	38	6.175E-6	="NA"	34	Infinity			-0.7687	Tissue__TCGA-LUSC
54879	Tissue	1	529	9.85E-4	="NA"	34	Infinity			0.9097	Tissue__GTEx_normal
54739	Tissue	1	455	9.85E-4	="NA"	35	Infinity			0.9094	Tissue__GTEx_normal
66058	Tissue	1	319	3.529E-4	="NA"	35	Infinity			0.7402	Tissue__TCGA-NORMAL
54727	Tissue	1	702	5.608E-4	="NA"	35	Infinity			0.7725	Tissue__TCGA-LUSC
54668	Tissue	1	68	2.29E-4	="NA"	35	Infinity			0.7396	Tissue__TCGA-LUAD
54666	Tissue	1	198	1.071E-5	="NA"	36	Infinity			0.7323	Tissue__TCGA-LUAD
56399	Tissue	1	640	9.85E-4	="NA"	36	Infinity			0.9092	Tissue__GTEx_normal
54664	Tissue	1	258	3.529E-4	="NA"	36	Infinity			0.7397	Tissue__TCGA-NORMAL
54657	Tissue	2	658	1.439E-4	="NA"	36	Infinity			0.7689	Tissue__TCGA-LUSC
65334	Tissue	1	592	2.592E-4	="NA"	36	Infinity			0.9091	Tissue__GTEx_normal
54336	Tissue	1	218	1.439E-4	="NA"	37	Infinity			0.7674	Tissue__TCGA-LUSC
54334	Tissue	1	478	6.175E-6	="NA"	37	Infinity			0.764	Tissue__TCGA-LUSC
54330	Tissue	1	341	3.529E-4	="NA"	37	Infinity			0.7389	Tissue__TCGA-NORMAL
54145	Tissue	1	632	9.85E-4	="NA"	37	Infinity			0.9091	Tissue__GTEx_normal
64519	Tissue	1	632	9.85E-4	="NA"	37	Infinity			0.9091	Tissue__GTEx_normal
61599	Tissue	2	601	8.554E-4	="NA"	37	Infinity			0.7367	Tissue__TCGA-LUAD
63461	Tissue	1	288	3.529E-4	="NA"	38	Infinity			0.7374	Tissue__TCGA-NORMAL
53729	Tissue	1	40	1.436E-9	="NA"	38	Infinity			-0.7553	Tissue__TCGA-LUSC
60235	Tissue	1	345	8.554E-4	="NA"	38	Infinity			0.7357	Tissue__TCGA-LUAD
60796	Tissue	1	632	9.85E-4	="NA"	38	Infinity			0.9083	Tissue__GTEx_normal
53721	Tissue	1	476	1.071E-5	="NA"	38	Infinity			0.731	Tissue__TCGA-LUAD
53668	Tissue	1	53	5.608E-4	="NA"	39	Infinity			-0.7645	Tissue__TCGA-LUSC
66105	Tissue	1	576	6.175E-6	="NA"	39	Infinity			0.7592	Tissue__TCGA-LUSC
58530	Tissue	1	329	1.071E-5	="NA"	39	Infinity			0.7297	Tissue__TCGA-LUAD
64954	Tissue	1	628	9.85E-4	="NA"	39	Infinity			0.9082	Tissue__GTEx_normal
53657	Tissue	1	99	3.211E-5	="NA"	39	Infinity			0.7604	Tissue__TCGA-LUSC
61949	Tissue	1	224	3.529E-4	="NA"	39	Infinity			-0.7369	Tissue__TCGA-NORMAL
65492	Tissue	1	294	3.529E-4	="NA"	40	Infinity			0.735	Tissue__TCGA-NORMAL
63155	Tissue	1	628	9.85E-4	="NA"	40	Infinity			0.9069	Tissue__GTEx_normal
53561	Tissue	1	625	8.554E-4	="NA"	40	Infinity			0.7316	Tissue__TCGA-LUAD
53549	Tissue	1	123	6.175E-6	="NA"	40	Infinity			0.7591	Tissue__TCGA-LUSC
53548	Tissue	1	290	1.071E-5	="NA"	40	Infinity			-0.7286	Tissue__TCGA-LUAD
53328	Tissue	1	71	1.071E-5	="NA"	41	Infinity			0.7283	Tissue__TCGA-LUAD
61211	Tissue	1	247	3.529E-4	="NA"	41	Infinity			0.7343	Tissue__TCGA-NORMAL
63235	Tissue	1	558	6.175E-6	="NA"	41	Infinity			0.757	Tissue__TCGA-LUSC
65714	Tissue	1	295	5.941E-5	="NA"	41	Infinity			0.7332	Tissue__TCGA-NORMAL
66394	Tissue	2	71	3.529E-4	="NA"	41	Infinity			0.7343	Tissue__TCGA-NORMAL
65333	Tissue	1	591	9.85E-4	="NA"	41	Infinity			0.9062	Tissue__GTEx_normal
55654	Tissue	1	30	6.818E-5	="NA"	42	Infinity			-0.7575	Tissue__TCGA-LUSC
66254	Tissue	1	341	3.529E-4	="NA"	42	Infinity			0.7315	Tissue__TCGA-NORMAL
54144	Tissue	1	637	9.85E-4	="NA"	42	Infinity			0.9059	Tissue__GTEx_normal
60234	Tissue	1	586	2.592E-4	="NA"	42	Infinity			0.9043	Tissue__GTEx_normal
64518	Tissue	1	275	1.071E-5	="NA"	42	Infinity			-0.7277	Tissue__TCGA-LUAD
53308	Tissue	1	82	3.122E-8	="NA"	42	Infinity			0.7253	Tissue__TCGA-LUAD
61210	Tissue	1	233	5.941E-5	="NA"	43	Infinity			0.7251	Tissue__TCGA-NORMAL
53246	Tissue	1	70	2.965E-9	="NA"	43	Infinity			0.724	Tissue__TCGA-LUAD
66345	Tissue	1	296	3.529E-4	="NA"	43	Infinity			0.7311	Tissue__TCGA-NORMAL
53175	Tissue	1	128	1.579E-8	="NA"	43	Infinity			0.7508	Tissue__TCGA-LUSC
53163	Tissue	1	624	9.85E-4	="NA"	43	Infinity			0.9043	Tissue__GTEx_normal
65414	Tissue	1	233	2.592E-4	="NA"	43	Infinity			0.9041	Tissue__GTEx_normal
56650	Tissue	1	305	2.29E-4	="NA"	44	Infinity			-0.7271	Tissue__TCGA-LUAD
53044	Tissue	1	50	1.439E-4	="NA"	44	Infinity			0.7549	Tissue__TCGA-LUSC
53032	Tissue	1	561	8.554E-4	="NA"	44	Infinity			0.7273	Tissue__TCGA-LUAD
53019	Tissue	1	333	3.529E-4	="NA"	44	Infinity			-0.725	Tissue__TCGA-NORMAL
53162	Tissue	1	566	2.592E-4	="NA"	44	Infinity			0.9032	Tissue__GTEx_normal
53006	Tissue	1	333	1.833E-6	="NA"	45	Infinity			0.7208	Tissue__TCGA-LUAD
58041	Tissue	1	598	9.85E-4	="NA"	45	Infinity			0.9031	Tissue__GTEx_normal
54726	Tissue	1	635	1.439E-4	="NA"	45	Infinity			0.7546	Tissue__TCGA-LUSC
52988	Tissue	1	322	3.529E-4	="NA"	45	Infinity			0.7243	Tissue__TCGA-NORMAL
52981	Tissue	1	338	2.29E-4	="NA"	46	Infinity			-0.7243	Tissue__TCGA-LUAD
52949	Tissue	1	98	1.439E-4	="NA"	46	Infinity			0.7543	Tissue__TCGA-LUSC
52948	Tissue	1	360	3.529E-4	="NA"	46	Infinity			0.724	Tissue__TCGA-NORMAL
52932	Tissue	1	243	8.554E-4	="NA"	46	Infinity			-0.7246	Tissue__TCGA-LUAD
52837	Tissue	1	54	3.211E-5	="NA"	46	Infinity			0.7513	Tissue__TCGA-LUSC
52836	Tissue	1	30	6.818E-5	="NA"	46	Infinity			-0.7522	Tissue__TCGA-LUSC
64517	Tissue	1	639	9.85E-4	="NA"	46	Infinity			0.903	Tissue__GTEx_normal
56213	Tissue	2	488	1.833E-6	="NA"	46	Infinity			0.7199	Tissue__TCGA-LUAD
52817	Tissue	1	74	5.334E-5	="NA"	47	Infinity			0.7195	Tissue__TCGA-LUAD
59205	Tissue	1	614	3.211E-5	="NA"	47	Infinity			0.749	Tissue__TCGA-LUSC
64953	Tissue	1	606	9.85E-4	="NA"	47	Infinity			0.9029	Tissue__GTEx_normal
53005	Tissue	1	403	1.071E-5	="NA"	47	Infinity			0.7194	Tissue__TCGA-LUAD
52787	Tissue	1	316	3.529E-4	="NA"	47	Infinity			0.7235	Tissue__TCGA-NORMAL
60499	Tissue	1	571	2.592E-4	="NA"	47	Infinity			0.9018	Tissue__GTEx_normal
52758	Tissue	1	279	1.071E-5	="NA"	48	Infinity			-0.7189	Tissue__TCGA-LUAD
63718	Tissue	1	630	9.85E-4	="NA"	48	Infinity			0.9018	Tissue__GTEx_normal
52554	Tissue	1	77	6.175E-6	="NA"	48	Infinity			0.7471	Tissue__TCGA-LUSC
66344	Tissue	1	296	3.529E-4	="NA"	48	Infinity			0.7228	Tissue__TCGA-NORMAL
56212	Tissue	1	472	2.635E-7	="NA"	48	Infinity			0.7181	Tissue__TCGA-LUAD
52375	Tissue	1	49	1.439E-4	="NA"	49	Infinity			-0.7483	Tissue__TCGA-LUSC
58472	Tissue	1	96	2.29E-4	="NA"	49	Infinity			-0.7189	Tissue__TCGA-LUAD
63460	Tissue	1	335	3.529E-4	="NA"	49	Infinity			0.7226	Tissue__TCGA-NORMAL
52373	Tissue	1	365	5.334E-5	="NA"	49	Infinity			0.7186	Tissue__TCGA-LUAD
52363	Tissue	1	36	1.012E-6	="NA"	49	Infinity			-0.7444	Tissue__TCGA-LUSC
65332	Tissue	1	612	9.85E-4	="NA"	49	Infinity			0.9017	Tissue__GTEx_normal
65331	Tissue	1	590	9.85E-4	="NA"	49	Infinity			0.9017	Tissue__GTEx_normal
52361	Tissue	2	96	3.211E-5	="NA"	49	Infinity			0.7449	Tissue__TCGA-LUSC
52335	Tissue	1	522	1.833E-6	="NA"	49	Infinity			0.7176	Tissue__TCGA-LUAD
63742	Tissue	1	641	1.071E-5	="NA"	50	Infinity			0.7169	Tissue__TCGA-LUAD
52224	Tissue	1	301	3.529E-4	="NA"	50	Infinity			0.722	Tissue__TCGA-NORMAL
64516	Tissue	1	622	9.85E-4	="NA"	50	Infinity			0.9009	Tissue__GTEx_normal
52172	Tissue	1	56	6.175E-6	="NA"	50	Infinity			-0.7439	Tissue__TCGA-LUSC
55589	Tissue	1	578	9.85E-4	="NA"	51	Infinity			0.9004	Tissue__GTEx_normal
52170	Tissue	1	197	3.529E-4	="NA"	51	Infinity			0.7197	Tissue__TCGA-NORMAL
66343	Tissue	1	567	1.439E-4	="NA"	51	Infinity			0.7447	Tissue__TCGA-LUSC
54143	Tissue	1	577	2.592E-4	="NA"	51	Infinity			0.9	Tissue__GTEx_normal
53307	Tissue	1	96	1.071E-5	="NA"	51	Infinity			0.7159	Tissue__TCGA-LUAD
60022	Tissue	1	47	1.439E-4	="NA"	51	Infinity			0.7447	Tissue__TCGA-LUSC
52167	Tissue	1	84	2.635E-7	="NA"	52	Infinity			0.7147	Tissue__TCGA-LUAD
52166	Tissue	1	57	6.175E-6	="NA"	52	Infinity			-0.7429	Tissue__TCGA-LUSC
53004	Tissue	1	328	1.833E-6	="NA"	52	Infinity			-0.7157	Tissue__TCGA-LUAD
66057	Tissue	1	329	3.529E-4	="NA"	52	Infinity			0.7195	Tissue__TCGA-NORMAL
61856	Tissue	1	582	2.592E-4	="NA"	52	Infinity			0.8989	Tissue__GTEx_normal
65413	Tissue	1	290	9.85E-4	="NA"	52	Infinity			0.8999	Tissue__GTEx_normal
52786	Tissue	1	349	3.529E-4	="NA"	53	Infinity			0.7193	Tissue__TCGA-NORMAL
63717	Tissue	1	600	9.85E-4	="NA"	53	Infinity			0.8982	Tissue__GTEx_normal
52553	Tissue	3	107	1.439E-4	="NA"	53	Infinity			0.7434	Tissue__TCGA-LUSC
53284	Tissue	1	572	2.29E-4	="NA"	53	Infinity			0.7158	Tissue__TCGA-LUAD
66392	Tissue	1	302	1.833E-6	="NA"	53	Infinity			0.7139	Tissue__TCGA-LUAD
52067	Tissue	1	44	5.334E-5	="NA"	54	Infinity			0.7115	Tissue__TCGA-LUAD
52066	Tissue	1	616	3.211E-5	="NA"	54	Infinity			0.7421	Tissue__TCGA-LUSC
52059	Tissue	1	45	5.608E-4	="NA"	54	Infinity			0.7439	Tissue__TCGA-LUSC
61209	Tissue	1	289	3.529E-4	="NA"	54	Infinity			0.7186	Tissue__TCGA-NORMAL
51709	Tissue	1	96	1.071E-5	="NA"	54	Infinity			-0.7114	Tissue__TCGA-LUAD
58040	Tissue	1	601	9.85E-4	="NA"	54	Infinity			0.898	Tissue__GTEx_normal
52552	Tissue	1	87	1.012E-6	="NA"	54	Infinity			0.741	Tissue__TCGA-LUSC
51675	Tissue	1	130	2.29E-4	="NA"	54	Infinity			0.7117	Tissue__TCGA-LUAD
51673	Tissue	1	575	2.592E-4	="NA"	54	Infinity			0.8978	Tissue__GTEx_normal
51568	Tissue	2	110	1.439E-4	="NA"	55	Infinity			0.7424	Tissue__TCGA-LUSC
51559	Tissue	1	328	1.833E-6	="NA"	55	Infinity			-0.7058	Tissue__TCGA-LUAD
66342	Tissue	1	309	3.529E-4	="NA"	55	Infinity			0.7181	Tissue__TCGA-NORMAL
51519	Tissue	2	289	1.436E-9	="NA"	55	Infinity			0.7387	Tissue__TCGA-LUSC
65330	Tissue	1	630	9.85E-4	="NA"	55	Infinity			0.8977	Tissue__GTEx_normal
64686	Tissue	1	573	2.29E-4	="NA"	55	Infinity			0.7079	Tissue__TCGA-LUAD
56737	Tissue	1	276	5.941E-5	="NA"	55	Infinity			0.716	Tissue__TCGA-NORMAL
51516	Tissue	1	79	1.439E-4	="NA"	56	Infinity			-0.7413	Tissue__TCGA-LUSC
61208	Tissue	1	146	2.29E-4	="NA"	56	Infinity			-0.7075	Tissue__TCGA-LUAD
63234	Tissue	1	374	1.833E-6	="NA"	56	Infinity			0.7056	Tissue__TCGA-LUAD
59632	Tissue	1	298	3.529E-4	="NA"	56	Infinity			0.7155	Tissue__TCGA-NORMAL
60795	Tissue	1	603	9.85E-4	="NA"	56	Infinity			0.8966	Tissue__GTEx_normal
52334	Tissue	1	71	5.334E-5	="NA"	56	Infinity			0.7064	Tissue__TCGA-LUAD
51508	Tissue	1	487	6.175E-6	="NA"	57	Infinity			0.7388	Tissue__TCGA-LUSC
51507	Tissue	1	226	3.529E-4	="NA"	57	Infinity			0.7143	Tissue__TCGA-NORMAL
59650	Tissue	2	141	1.439E-4	="NA"	57	Infinity			0.7407	Tissue__TCGA-LUSC
56211	Tissue	2	528	1.833E-6	="NA"	57	Infinity			0.705	Tissue__TCGA-LUAD
51493	Tissue	1	624	9.85E-4	="NA"	57	Infinity			0.8965	Tissue__GTEx_normal
51107	Tissue	1	67	1.833E-6	="NA"	58	Infinity			-0.7048	Tissue__TCGA-LUAD
51106	Tissue	1	120	1.579E-8	="NA"	58	Infinity			-0.7367	Tissue__TCGA-LUSC
65713	Tissue	1	260	5.941E-5	="NA"	58	Infinity			0.7115	Tissue__TCGA-NORMAL
65329	Tissue	1	568	2.592E-4	="NA"	58	Infinity			0.8958	Tissue__GTEx_normal
64515	Tissue	1	604	9.85E-4	="NA"	58	Infinity			0.8963	Tissue__GTEx_normal
51103	Tissue	1	313	3.529E-4	="NA"	58	Infinity			-0.7132	Tissue__TCGA-NORMAL
52399	Tissue	1	415	3.122E-8	="NA"	59	Infinity			0.7018	Tissue__TCGA-LUAD
63237	Tissue	1	36	5.608E-4	="NA"	59	Infinity			0.7403	Tissue__TCGA-LUSC
54329	Tissue	1	344	3.529E-4	="NA"	59	Infinity			0.7107	Tissue__TCGA-NORMAL
51492	Tissue	1	601	9.85E-4	="NA"	59	Infinity			0.8952	Tissue__GTEx_normal
61207	Tissue	1	245	3.529E-4	="NA"	60	Infinity			0.7101	Tissue__TCGA-NORMAL
50862	Tissue	1	42	5.608E-4	="NA"	60	Infinity			0.7394	Tissue__TCGA-LUSC
50861	Tissue	1	42	1.833E-6	="NA"	60	Infinity			-0.7005	Tissue__TCGA-LUAD
64514	Tissue	1	616	9.85E-4	="NA"	60	Infinity			0.8949	Tissue__GTEx_normal
54665	Tissue	1	174	8.554E-4	="NA"	61	Infinity			-0.7036	Tissue__TCGA-LUAD
50849	Tissue	1	160	1.393E-7	="NA"	61	Infinity			0.7343	Tissue__TCGA-LUSC
50839	Tissue	1	62	6.175E-6	="NA"	61	Infinity			-0.7361	Tissue__TCGA-LUSC
50838	Tissue	1	319	1.436E-9	="NA"	61	Infinity			0.7287	Tissue__TCGA-LUSC
60233	Tissue	1	614	9.85E-4	="NA"	61	Infinity			0.8948	Tissue__GTEx_normal
50782	Tissue	1	336	3.529E-4	="NA"	61	Infinity			0.709	Tissue__TCGA-NORMAL
56210	Tissue	1	460	1.833E-6	="NA"	61	Infinity			0.7003	Tissue__TCGA-LUAD
50775	Tissue	2	274	9.85E-4	="NA"	62	Infinity			0.8945	Tissue__GTEx_normal
60498	Tissue	1	566	2.592E-4	="NA"	62	Infinity			0.8944	Tissue__GTEx_normal
59280	Tissue	1	338	3.529E-4	="NA"	62	Infinity			0.7088	Tissue__TCGA-NORMAL
50714	Tissue	1	66	8.554E-4	="NA"	62	Infinity			-0.7019	Tissue__TCGA-LUAD
50713	Tissue	2	36	5.608E-4	="NA"	62	Infinity			0.7377	Tissue__TCGA-LUSC
50712	Tissue	1	260	1.833E-6	="NA"	62	Infinity			0.6993	Tissue__TCGA-LUAD
50708	Tissue	1	704	5.608E-4	="NA"	63	Infinity			0.7372	Tissue__TCGA-LUSC
52058	Tissue	3	75	6.175E-6	="NA"	63	Infinity			0.7335	Tissue__TCGA-LUSC
66087	Tissue	1	458	1.012E-6	="NA"	63	Infinity			0.7317	Tissue__TCGA-LUSC
59134	Tissue	1	90	1.833E-6	="NA"	63	Infinity			0.6992	Tissue__TCGA-LUAD
60497	Tissue	1	580	2.592E-4	="NA"	63	Infinity			0.8943	Tissue__GTEx_normal
53547	Tissue	1	247	3.529E-4	="NA"	63	Infinity			0.7062	Tissue__TCGA-NORMAL
51102	Tissue	1	534	1.071E-5	="NA"	63	Infinity			0.6993	Tissue__TCGA-LUAD
55588	Tissue	1	579	2.592E-4	="NA"	64	Infinity			0.8942	Tissue__GTEx_normal
50244	Tissue	2	724	5.608E-4	="NA"	64	Infinity			0.7353	Tissue__TCGA-LUSC
55516	Tissue	1	322	3.529E-4	="NA"	64	Infinity			0.7055	Tissue__TCGA-NORMAL
61855	Tissue	1	427	8.554E-4	="NA"	64	Infinity			-0.7003	Tissue__TCGA-LUAD
63154	Tissue	1	594	2.592E-4	="NA"	65	Infinity			0.8938	Tissue__GTEx_normal
65712	Tissue	1	348	3.529E-4	="NA"	65	Infinity			0.7045	Tissue__TCGA-NORMAL
50131	Tissue	1	54	1.833E-6	="NA"	65	Infinity			-0.6972	Tissue__TCGA-LUAD
64685	Tissue	1	581	6.175E-6	="NA"	65	Infinity			0.7253	Tissue__TCGA-LUSC
64525	Tissue	1	576	8.554E-4	="NA"	66	Infinity			0.6986	Tissue__TCGA-LUAD
50127	Tissue	1	35	6.175E-6	="NA"	66	Infinity			-0.7241	Tissue__TCGA-LUSC
59133	Tissue	1	62	3.122E-8	="NA"	66	Infinity			0.6953	Tissue__TCGA-LUAD
61745	Tissue	1	606	9.85E-4	="NA"	66	Infinity			0.8935	Tissue__GTEx_normal
54328	Tissue	1	337	3.529E-4	="NA"	66	Infinity			0.7037	Tissue__TCGA-NORMAL
54142	Tissue	1	637	9.85E-4	="NA"	66	Infinity			0.8935	Tissue__GTEx_normal
50098	Tissue	1	126	8.554E-4	="NA"	67	Infinity			0.6977	Tissue__TCGA-LUAD
50094	Tissue	1	338	3.529E-4	="NA"	67	Infinity			0.7028	Tissue__TCGA-NORMAL
51105	Tissue	1	141	1.579E-8	="NA"	67	Infinity			-0.7193	Tissue__TCGA-LUSC
63716	Tissue	1	614	9.85E-4	="NA"	67	Infinity			0.893	Tissue__GTEx_normal
50019	Tissue	1	279	9.85E-4	="NA"	68	Infinity			0.8929	Tissue__GTEx_normal
50017	Tissue	1	253	3.529E-4	="NA"	68	Infinity			0.7025	Tissue__TCGA-NORMAL
64952	Tissue	1	602	2.592E-4	="NA"	68	Infinity			0.8928	Tissue__GTEx_normal
50001	Tissue	1	430	5.334E-5	="NA"	68	Infinity			0.6956	Tissue__TCGA-LUAD
66253	Tissue	1	306	5.941E-5	="NA"	68	Infinity			0.7006	Tissue__TCGA-NORMAL
49964	Tissue	1	487	1.833E-6	="NA"	68	Infinity			0.6953	Tissue__TCGA-LUAD
49939	Tissue	1	556	6.175E-6	="NA"	68	Infinity			0.7202	Tissue__TCGA-LUSC
49938	Tissue	1	67	3.211E-5	="NA"	68	Infinity			-0.7209	Tissue__TCGA-LUSC
62381	Tissue	1	635	3.211E-5	="NA"	69	Infinity			0.7202	Tissue__TCGA-LUSC
62187	Tissue	1	612	9.85E-4	="NA"	69	Infinity			0.8922	Tissue__GTEx_normal
66086	Tissue	2	316	6.175E-6	="NA"	69	Infinity			0.72	Tissue__TCGA-LUSC
61206	Tissue	1	277	5.941E-5	="NA"	69	Infinity			0.6998	Tissue__TCGA-NORMAL
49935	Tissue	2	546	8.554E-4	="NA"	69	Infinity			0.6963	Tissue__TCGA-LUAD
64616	Tissue	1	61	5.608E-4	="NA"	69	Infinity			0.7281	Tissue__TCGA-LUSC
53306	Tissue	1	39	1.833E-6	="NA"	69	Infinity			-0.6925	Tissue__TCGA-LUAD
50763	Tissue	1	276	3.529E-4	="NA"	70	Infinity			0.697	Tissue__TCGA-NORMAL
52816	Tissue	1	584	8.554E-4	="NA"	70	Infinity			0.6955	Tissue__TCGA-LUAD
61744	Tissue	1	598	2.592E-4	="NA"	70	Infinity			0.8915	Tissue__GTEx_normal
49659	Tissue	1	55	1.393E-7	="NA"	70	Infinity			-0.7143	Tissue__TCGA-LUSC
60232	Tissue	1	616	9.85E-4	="NA"	70	Infinity			0.8916	Tissue__GTEx_normal
49656	Tissue	1	52	1.579E-8	="NA"	70	Infinity			-0.7131	Tissue__TCGA-LUSC
56209	Tissue	2	508	1.071E-5	="NA"	70	Infinity			0.6905	Tissue__TCGA-LUAD
61598	Tissue	3	113	3.211E-5	="NA"	70	Infinity			0.7187	Tissue__TCGA-LUSC
49654	Tissue	1	335	3.529E-4	="NA"	71	Infinity			0.6963	Tissue__TCGA-NORMAL
49650	Tissue	1	31	5.094E-12	="NA"	71	Infinity			-0.7073	Tissue__TCGA-LUSC
49649	Tissue	1	30	7.522E-9	="NA"	71	Infinity			-0.6849	Tissue__TCGA-LUAD
61743	Tissue	1	603	9.85E-4	="NA"	71	Infinity			0.8915	Tissue__GTEx_normal
49612	Tissue	1	418	5.334E-5	="NA"	71	Infinity			-0.6895	Tissue__TCGA-LUAD
49609	Tissue	1	302	2.29E-4	="NA"	71	Infinity			-0.6896	Tissue__TCGA-LUAD
49558	Tissue	1	434	3.211E-5	="NA"	72	Infinity			0.7152	Tissue__TCGA-LUSC
64951	Tissue	1	607	9.85E-4	="NA"	72	Infinity			0.8914	Tissue__GTEx_normal
49544	Tissue	1	301	5.941E-5	="NA"	72	Infinity			0.6947	Tissue__TCGA-NORMAL
60496	Tissue	1	591	2.592E-4	="NA"	72	Infinity			0.8911	Tissue__GTEx_normal
49518	Tissue	1	276	3.529E-4	="NA"	72	Infinity			0.6953	Tissue__TCGA-NORMAL
57635	Tissue	1	594	1.071E-5	="NA"	72	Infinity			0.6872	Tissue__TCGA-LUAD
60591	Tissue	1	627	9.85E-4	="NA"	73	Infinity			0.8911	Tissue__GTEx_normal
49512	Tissue	1	131	5.608E-4	="NA"	73	Infinity			0.7157	Tissue__TCGA-LUSC
60495	Tissue	1	572	2.592E-4	="NA"	73	Infinity			0.8908	Tissue__GTEx_normal
49503	Tissue	1	35	1.436E-9	="NA"	73	Infinity			0.7062	Tissue__TCGA-LUSC
49502	Tissue	1	36	5.941E-5	="NA"	73	Infinity			-0.6932	Tissue__TCGA-NORMAL
64513	Tissue	1	636	9.85E-4	="NA"	73	Infinity			0.8911	Tissue__GTEx_normal
57634	Tissue	2	541	2.29E-4	="NA"	73	Infinity			0.6889	Tissue__TCGA-LUAD
58079	Tissue	1	306	3.529E-4	="NA"	74	Infinity			0.6917	Tissue__TCGA-NORMAL
58039	Tissue	2	700	5.608E-4	="NA"	74	Infinity			0.7107	Tissue__TCGA-LUSC
64512	Tissue	1	633	9.85E-4	="NA"	74	Infinity			0.8908	Tissue__GTEx_normal
61854	Tissue	1	595	2.592E-4	="NA"	74	Infinity			0.8904	Tissue__GTEx_normal
56208	Tissue	2	452	1.833E-6	="NA"	74	Infinity			0.6842	Tissue__TCGA-LUAD
56768	Tissue	1	83	8.554E-4	="NA"	75	Infinity			0.6867	Tissue__TCGA-LUAD
65711	Tissue	1	337	3.529E-4	="NA"	75	Infinity			-0.6912	Tissue__TCGA-NORMAL
49410	Tissue	1	297	5.941E-5	="NA"	75	Infinity			0.6905	Tissue__TCGA-NORMAL
65470	Tissue	1	83	5.608E-4	="NA"	75	Infinity			0.7102	Tissue__TCGA-LUSC
64511	Tissue	1	608	9.85E-4	="NA"	75	Infinity			0.8904	Tissue__GTEx_normal
60494	Tissue	1	551	6.028E-5	="NA"	76	Infinity			0.8889	Tissue__GTEx_normal
53283	Tissue	1	668	8.554E-4	="NA"	76	Infinity			0.6858	Tissue__TCGA-LUAD
49399	Tissue	1	76	2.635E-7	="NA"	76	Infinity			0.6836	Tissue__TCGA-LUAD
49351	Tissue	1	115	5.608E-4	="NA"	76	Infinity			0.7087	Tissue__TCGA-LUSC
56544	Tissue	1	337	3.529E-4	="NA"	76	Infinity			0.688	Tissue__TCGA-NORMAL
51672	Tissue	1	603	9.85E-4	="NA"	76	Infinity			0.8903	Tissue__GTEx_normal
52398	Tissue	2	178	3.211E-5	="NA"	77	Infinity			0.706	Tissue__TCGA-LUSC
63741	Tissue	1	647	5.334E-5	="NA"	77	Infinity			0.6837	Tissue__TCGA-LUAD
56689	Tissue	1	693	5.608E-4	="NA"	77	Infinity			0.7076	Tissue__TCGA-LUSC
66341	Tissue	1	319	3.529E-4	="NA"	77	Infinity			0.6854	Tissue__TCGA-NORMAL
64510	Tissue	1	628	9.85E-4	="NA"	77	Infinity			0.8898	Tissue__GTEx_normal
52411	Tissue	1	480	2.635E-7	="NA"	78	Infinity			-0.6768	Tissue__TCGA-LUAD
49288	Tissue	1	288	3.529E-4	="NA"	78	Infinity			-0.6849	Tissue__TCGA-NORMAL
49222	Tissue	1	81	8.554E-4	="NA"	78	Infinity			-0.6839	Tissue__TCGA-LUAD
49220	Tissue	1	640	9.85E-4	="NA"	78	Infinity			0.8888	Tissue__GTEx_normal
62863	Tissue	2	676	5.608E-4	="NA"	78	Infinity			0.707	Tissue__TCGA-LUSC
49106	Tissue	1	536	2.29E-4	="NA"	79	Infinity			0.6802	Tissue__TCGA-LUAD
63459	Tissue	1	282	3.529E-4	="NA"	79	Infinity			0.6844	Tissue__TCGA-NORMAL
49102	Tissue	1	393	1.579E-8	="NA"	79	Infinity			0.7017	Tissue__TCGA-LUSC
49098	Tissue	1	54	1.393E-7	="NA"	79	Infinity			0.7019	Tissue__TCGA-LUSC
49097	Tissue	1	308	5.941E-5	="NA"	79	Infinity			0.684	Tissue__TCGA-NORMAL
49078	Tissue	1	185	8.554E-4	="NA"	79	Infinity			-0.6806	Tissue__TCGA-LUAD
48764	Tissue	1	262	9.85E-4	="NA"	79	Infinity			0.8886	Tissue__GTEx_normal
51671	Tissue	1	553	2.592E-4	="NA"	79	Infinity			0.8885	Tissue__GTEx_normal
48756	Tissue	1	625	1.439E-4	="NA"	79	Infinity			0.7045	Tissue__TCGA-LUSC
63715	Tissue	1	631	9.85E-4	="NA"	80	Infinity			0.8885	Tissue__GTEx_normal
49934	Tissue	3	114	1.439E-4	="NA"	80	Infinity			0.7044	Tissue__TCGA-LUSC
64615	Tissue	2	168	3.122E-8	="NA"	80	Infinity			0.6717	Tissue__TCGA-LUAD
52223	Tissue	1	336	3.529E-4	="NA"	80	Infinity			0.6829	Tissue__TCGA-NORMAL
62862	Tissue	2	566	8.554E-4	="NA"	80	Infinity			0.6762	Tissue__TCGA-LUAD
48684	Tissue	1	62	8.554E-4	="NA"	81	Infinity			-0.6758	Tissue__TCGA-LUAD
48681	Tissue	1	69	1.439E-4	="NA"	81	Infinity			0.7035	Tissue__TCGA-LUSC
50774	Tissue	1	235	6.028E-5	="NA"	81	Infinity			0.8879	Tissue__GTEx_normal
48675	Tissue	1	41	8.554E-4	="NA"	81	Infinity			-0.6758	Tissue__TCGA-LUAD
54141	Tissue	1	600	9.85E-4	="NA"	81	Infinity			0.8884	Tissue__GTEx_normal
60882	Tissue	1	535	2.29E-4	="NA"	81	Infinity			0.6752	Tissue__TCGA-LUAD
51101	Tissue	1	337	3.529E-4	="NA"	81	Infinity			0.6796	Tissue__TCGA-NORMAL
49608	Tissue	1	321	1.071E-5	="NA"	81	Infinity			-0.6722	Tissue__TCGA-LUAD
48664	Tissue	1	309	3.529E-4	="NA"	82	Infinity			0.6781	Tissue__TCGA-NORMAL
60000	Tissue	1	433	9.85E-4	="NA"	82	Infinity			0.888	Tissue__GTEx_normal
48499	Tissue	1	704	1.439E-4	="NA"	82	Infinity			0.7033	Tissue__TCGA-LUSC
48448	Tissue	1	44	1.66E-13	="NA"	82	Infinity			-0.6956	Tissue__TCGA-LUSC
48447	Tissue	1	415	6.028E-5	="NA"	82	Infinity			0.8878	Tissue__GTEx_normal
49219	Tissue	1	621	9.85E-4	="NA"	82	Infinity			0.888	Tissue__GTEx_normal
65469	Tissue	1	132	1.439E-4	="NA"	82	Infinity			0.7033	Tissue__TCGA-LUSC
48429	Tissue	1	38	2.171E-10	="NA"	82	Infinity			-0.6693	Tissue__TCGA-LUAD
60359	Tissue	1	640	1.439E-4	="NA"	83	Infinity			0.7029	Tissue__TCGA-LUSC
48426	Tissue	1	327	3.529E-4	="NA"	83	Infinity			0.6777	Tissue__TCGA-NORMAL
63153	Tissue	1	598	9.85E-4	="NA"	83	Infinity			0.8877	Tissue__GTEx_normal
49963	Tissue	1	537	1.833E-6	="NA"	83	Infinity			0.6716	Tissue__TCGA-LUAD
65468	Tissue	1	43	8.554E-4	="NA"	83	Infinity			-0.6723	Tissue__TCGA-LUAD
62186	Tissue	1	618	9.85E-4	="NA"	84	Infinity			0.8875	Tissue__GTEx_normal
48307	Tissue	1	394	1.393E-7	="NA"	84	Infinity			0.6977	Tissue__TCGA-LUSC
65467	Tissue	1	85	2.29E-4	="NA"	84	Infinity			0.6718	Tissue__TCGA-LUAD
48305	Tissue	1	108	1.833E-6	="NA"	84	Infinity			0.6714	Tissue__TCGA-LUAD
48207	Tissue	1	44	3.529E-4	="NA"	84	Infinity			-0.677	Tissue__TCGA-NORMAL
51491	Tissue	1	617	9.85E-4	="NA"	84	Infinity			0.8875	Tissue__GTEx_normal
48205	Tissue	1	57	1.833E-6	="NA"	85	Infinity			0.6712	Tissue__TCGA-LUAD
53174	Tissue	1	638	3.211E-5	="NA"	85	Infinity			0.7	Tissue__TCGA-LUSC
48203	Tissue	1	317	3.529E-4	="NA"	85	Infinity			0.6761	Tissue__TCGA-NORMAL
62185	Tissue	1	624	9.85E-4	="NA"	85	Infinity			0.8874	Tissue__GTEx_normal
60231	Tissue	1	606	9.85E-4	="NA"	85	Infinity			0.8874	Tissue__GTEx_normal
48094	Tissue	1	47	2.965E-9	="NA"	86	Infinity			0.6654	Tissue__TCGA-LUAD
48093	Tissue	1	50	5.608E-4	="NA"	86	Infinity			-0.7005	Tissue__TCGA-LUSC
60230	Tissue	1	616	9.85E-4	="NA"	86	Infinity			0.8868	Tissue__GTEx_normal
48092	Tissue	1	356	3.529E-4	="NA"	86	Infinity			-0.6755	Tissue__TCGA-NORMAL
60590	Tissue	1	637	9.85E-4	="NA"	87	Infinity			0.886	Tissue__GTEx_normal
57081	Tissue	1	592	2.592E-4	="NA"	87	Infinity			0.8858	Tissue__GTEx_normal
47969	Tissue	1	35	2.635E-7	="NA"	87	Infinity			0.6683	Tissue__TCGA-LUAD
65710	Tissue	1	234	5.941E-5	="NA"	87	Infinity			0.6742	Tissue__TCGA-NORMAL
66340	Tissue	1	317	3.529E-4	="NA"	87	Infinity			0.6743	Tissue__TCGA-NORMAL
49218	Tissue	1	629	9.85E-4	="NA"	87	Infinity			0.886	Tissue__GTEx_normal
47968	Tissue	1	92	3.211E-5	="NA"	87	Infinity			-0.6974	Tissue__TCGA-LUSC
47961	Tissue	2	687	5.608E-4	="NA"	88	Infinity			0.6986	Tissue__TCGA-LUSC
63253	Tissue	1	602	3.211E-5	="NA"	88	Infinity			0.6964	Tissue__TCGA-LUSC
63233	Tissue	2	578	8.554E-4	="NA"	88	Infinity			0.67	Tissue__TCGA-LUAD
59279	Tissue	1	305	3.529E-4	="NA"	88	Infinity			0.6738	Tissue__TCGA-NORMAL
64509	Tissue	1	579	2.592E-4	="NA"	88	Infinity			0.8857	Tissue__GTEx_normal
62861	Tissue	1	585	6.175E-6	="NA"	88	Infinity			0.6956	Tissue__TCGA-LUSC
52333	Tissue	2	50	3.122E-8	="NA"	88	Infinity			-0.6646	Tissue__TCGA-LUAD
47960	Tissue	1	66	1.393E-7	="NA"	89	Infinity			0.694	Tissue__TCGA-LUSC
59999	Tissue	1	438	9.85E-4	="NA"	89	Infinity			0.8856	Tissue__GTEx_normal
60493	Tissue	1	583	2.592E-4	="NA"	89	Infinity			0.8852	Tissue__GTEx_normal
47956	Tissue	1	104	5.334E-5	="NA"	89	Infinity			-0.6683	Tissue__TCGA-LUAD
54911	Tissue	1	286	5.941E-5	="NA"	89	Infinity			0.6721	Tissue__TCGA-NORMAL
47955	Tissue	1	292	3.529E-4	="NA"	89	Infinity			0.6724	Tissue__TCGA-NORMAL
47931	Tissue	1	311	3.529E-4	="NA"	90	Infinity			-0.6719	Tissue__TCGA-NORMAL
54140	Tissue	2	736	5.608E-4	="NA"	90	Infinity			0.6975	Tissue__TCGA-LUSC
54139	Tissue	1	582	2.592E-4	="NA"	90	Infinity			0.8851	Tissue__GTEx_normal
47895	Tissue	2	157	1.071E-5	="NA"	90	Infinity			0.6653	Tissue__TCGA-LUAD
47890	Tissue	1	575	8.554E-4	="NA"	90	Infinity			0.669	Tissue__TCGA-LUAD
47813	Tissue	1	227	3.529E-4	="NA"	91	Infinity			0.671	Tissue__TCGA-NORMAL
47770	Tissue	1	395	1.436E-9	="NA"	91	Infinity			0.691	Tissue__TCGA-LUSC
47752	Tissue	1	288	3.122E-8	="NA"	91	Infinity			0.6626	Tissue__TCGA-LUAD
47458	Tissue	1	597	9.85E-4	="NA"	91	Infinity			0.8851	Tissue__GTEx_normal
46884	Tissue	1	33	1.012E-6	="NA"	92	Infinity			0.6932	Tissue__TCGA-LUSC
46882	Tissue	2	335	5.767E-9	="NA"	92	Infinity			0.8832	Tissue__GTEx_normal
63458	Tissue	1	270	3.529E-4	="NA"	92	Infinity			0.6703	Tissue__TCGA-NORMAL
53282	Tissue	1	542	6.175E-6	="NA"	92	Infinity			0.6933	Tissue__TCGA-LUSC
49611	Tissue	1	416	5.334E-5	="NA"	92	Infinity			-0.6627	Tissue__TCGA-LUAD
51490	Tissue	1	628	9.85E-4	="NA"	92	Infinity			0.885	Tissue__GTEx_normal
46804	Tissue	1	99	5.334E-5	="NA"	93	Infinity			-0.6626	Tissue__TCGA-LUAD
62184	Tissue	1	622	9.85E-4	="NA"	93	Infinity			0.8849	Tissue__GTEx_normal
46794	Tissue	1	320	3.529E-4	="NA"	93	Infinity			-0.6702	Tissue__TCGA-NORMAL
46784	Tissue	1	62	1.436E-9	="NA"	93	Infinity			-0.6898	Tissue__TCGA-LUSC
46781	Tissue	1	235	8.554E-4	="NA"	93	Infinity			-0.6636	Tissue__TCGA-LUAD
53326	Tissue	2	98	5.608E-4	="NA"	94	Infinity			0.6949	Tissue__TCGA-LUSC
52397	Tissue	1	647	8.554E-4	="NA"	94	Infinity			0.6626	Tissue__TCGA-LUAD
46778	Tissue	1	341	3.529E-4	="NA"	94	Infinity			0.6699	Tissue__TCGA-NORMAL
61853	Tissue	1	648	9.85E-4	="NA"	94	Infinity			0.8846	Tissue__GTEx_normal
46749	Tissue	1	55	1.833E-6	="NA"	95	Infinity			-0.6572	Tissue__TCGA-LUAD
46666	Tissue	1	554	8.554E-4	="NA"	95	Infinity			-0.6624	Tissue__TCGA-LUAD
56398	Tissue	1	604	9.85E-4	="NA"	95	Infinity			0.8845	Tissue__GTEx_normal
46244	Tissue	1	352	3.529E-4	="NA"	95	Infinity			0.6698	Tissue__TCGA-NORMAL
49540	Tissue	1	295	5.941E-5	="NA"	95	Infinity			0.668	Tissue__TCGA-NORMAL
46235	Tissue	1	50	5.334E-5	="NA"	95	Infinity			-0.6603	Tissue__TCGA-LUAD
46225	Tissue	2	702	5.608E-4	="NA"	95	Infinity			0.6945	Tissue__TCGA-LUSC
46214	Tissue	1	39	1.439E-4	="NA"	95	Infinity			-0.6933	Tissue__TCGA-LUSC
53715	Tissue	2	147	8.554E-4	="NA"	96	Infinity			0.6617	Tissue__TCGA-LUAD
46187	Tissue	1	32	5.094E-12	="NA"	96	Infinity			-0.6858	Tissue__TCGA-LUSC
52551	Tissue	2	142	1.439E-4	="NA"	96	Infinity			0.6916	Tissue__TCGA-LUSC
61742	Tissue	1	596	2.592E-4	="NA"	96	Infinity			0.8837	Tissue__GTEx_normal
49217	Tissue	1	629	9.85E-4	="NA"	96	Infinity			0.884	Tissue__GTEx_normal
51100	Tissue	1	319	3.529E-4	="NA"	96	Infinity			0.6653	Tissue__TCGA-NORMAL
46161	Tissue	1	349	1.006E-10	="NA"	97	Infinity			0.6856	Tissue__TCGA-LUSC
46157	Tissue	1	283	3.529E-4	="NA"	97	Infinity			-0.6641	Tissue__TCGA-NORMAL
46154	Tissue	1	51	1.071E-5	="NA"	97	Infinity			-0.6564	Tissue__TCGA-LUAD
46152	Tissue	1	120	1.393E-7	="NA"	97	Infinity			-0.6879	Tissue__TCGA-LUSC
60794	Tissue	1	616	9.85E-4	="NA"	97	Infinity			0.8837	Tissue__GTEx_normal
46151	Tissue	1	41	8.554E-4	="NA"	98	Infinity			0.658	Tissue__TCGA-LUAD
63457	Tissue	1	297	3.529E-4	="NA"	98	Infinity			0.6637	Tissue__TCGA-NORMAL
61205	Tissue	1	335	3.529E-4	="NA"	98	Infinity			-0.6637	Tissue__TCGA-NORMAL
61741	Tissue	1	613	9.85E-4	="NA"	98	Infinity			0.8836	Tissue__GTEx_normal
46224	Tissue	2	732	5.608E-4	="NA"	98	Infinity			0.6914	Tissue__TCGA-LUSC
63259	Tissue	1	40	1.439E-4	="NA"	98	Infinity			0.6908	Tissue__TCGA-LUSC
60793	Tissue	1	549	6.028E-5	="NA"	98	Infinity			0.8832	Tissue__GTEx_normal
46135	Tissue	1	123	5.334E-5	="NA"	99	Infinity			-0.6562	Tissue__TCGA-LUAD
46134	Tissue	1	342	3.529E-4	="NA"	99	Infinity			-0.6635	Tissue__TCGA-NORMAL
56397	Tissue	1	397	1.071E-5	="NA"	99	Infinity			-0.6545	Tissue__TCGA-LUAD
66072	Tissue	2	593	6.175E-6	="NA"	99	Infinity			0.6862	Tissue__TCGA-LUSC
61740	Tissue	1	607	9.85E-4	="NA"	99	Infinity			0.8835	Tissue__GTEx_normal
65466	Tissue	1	32	3.122E-8	="NA"	99	Infinity			0.6525	Tissue__TCGA-LUAD
46105	Tissue	1	30	3.752E-9	="NA"	99	Infinity			0.6849	Tissue__TCGA-LUSC
63740	Tissue	1	551	1.071E-5	="NA"	100	Infinity			-0.6527	Tissue__TCGA-LUAD
45970	Tissue	1	102	6.175E-6	="NA"	100	Infinity			0.6861	Tissue__TCGA-LUSC
47963	Tissue	1	30	2.918E-4	="NA"	100	Infinity			-0.689	Tissue__TCGA-LUSC
45966	Tissue	1	332	3.529E-4	="NA"	100	Infinity			0.6631	Tissue__TCGA-NORMAL
59278	Tissue	1	277	5.941E-5	="NA"	100	Infinity			0.6627	Tissue__TCGA-NORMAL
65328	Tissue	1	580	2.592E-4	="NA"	100	Infinity			0.883	Tissue__GTEx_normal
53003	Tissue	1	359	2.635E-7	="NA"	101	Infinity			-0.6516	Tissue__TCGA-LUAD
56688	Tissue	1	689	5.608E-4	="NA"	101	Infinity			0.6889	Tissue__TCGA-LUSC
66339	Tissue	1	272	5.941E-5	="NA"	101	Infinity			0.6623	Tissue__TCGA-NORMAL
61739	Tissue	1	600	2.592E-4	="NA"	101	Infinity			0.8827	Tissue__GTEx_normal
45792	Tissue	2	630	9.85E-4	="NA"	101	Infinity			0.8828	Tissue__GTEx_normal
45771	Tissue	1	378	1.006E-10	="NA"	101	Infinity			0.6831	Tissue__TCGA-LUSC
57649	Tissue	1	492	1.071E-5	="NA"	102	Infinity			0.6523	Tissue__TCGA-LUAD
57080	Tissue	1	614	9.85E-4	="NA"	102	Infinity			0.8824	Tissue__GTEx_normal
65709	Tissue	1	291	5.941E-5	="NA"	102	Infinity			0.6618	Tissue__TCGA-NORMAL
52550	Tissue	2	104	6.175E-6	="NA"	102	Infinity			0.6836	Tissue__TCGA-LUSC
45749	Tissue	1	458	3.122E-8	="NA"	102	Infinity			0.651	Tissue__TCGA-LUAD
66056	Tissue	1	319	3.529E-4	="NA"	102	Infinity			0.6621	Tissue__TCGA-NORMAL
52332	Tissue	1	580	8.554E-4	="NA"	102	Infinity			0.6534	Tissue__TCGA-LUAD
45736	Tissue	1	480	1.579E-8	="NA"	103	Infinity			0.6821	Tissue__TCGA-LUSC
63739	Tissue	1	479	1.833E-6	="NA"	103	Infinity			-0.6495	Tissue__TCGA-LUAD
45688	Tissue	1	266	3.529E-4	="NA"	103	Infinity			0.6614	Tissue__TCGA-NORMAL
56396	Tissue	1	607	9.85E-4	="NA"	103	Infinity			0.8823	Tissue__GTEx_normal
45677	Tissue	1	303	6.175E-6	="NA"	103	Infinity			0.6835	Tissue__TCGA-LUSC
65327	Tissue	1	576	2.592E-4	="NA"	103	Infinity			0.8821	Tissue__GTEx_normal
52360	Tissue	1	588	1.071E-5	="NA"	103	Infinity			0.6501	Tissue__TCGA-LUAD
54138	Tissue	1	609	9.85E-4	="NA"	103	Infinity			0.8823	Tissue__GTEx_normal
51489	Tissue	1	608	9.85E-4	="NA"	103	Infinity			0.8823	Tissue__GTEx_normal
53546	Tissue	1	169	8.554E-4	="NA"	104	Infinity			-0.6515	Tissue__TCGA-LUAD
53281	Tissue	1	493	1.439E-4	="NA"	104	Infinity			0.6844	Tissue__TCGA-LUSC
49409	Tissue	1	298	3.529E-4	="NA"	104	Infinity			0.6613	Tissue__TCGA-NORMAL
61852	Tissue	1	646	9.85E-4	="NA"	104	Infinity			0.8816	Tissue__GTEx_normal
53714	Tissue	1	206	8.554E-4	="NA"	105	Infinity			0.6491	Tissue__TCGA-LUAD
62183	Tissue	1	610	9.85E-4	="NA"	105	Infinity			0.8815	Tissue__GTEx_normal
65708	Tissue	1	360	3.529E-4	="NA"	105	Infinity			0.6605	Tissue__TCGA-NORMAL
63714	Tissue	1	623	9.85E-4	="NA"	105	Infinity			0.8815	Tissue__GTEx_normal
52359	Tissue	2	131	1.071E-5	="NA"	105	Infinity			0.6487	Tissue__TCGA-LUAD
45675	Tissue	1	618	1.439E-4	="NA"	105	Infinity			0.6836	Tissue__TCGA-LUSC
47457	Tissue	1	398	2.29E-4	="NA"	105	Infinity			-0.649	Tissue__TCGA-LUAD
45664	Tissue	1	252	3.122E-8	="NA"	106	Infinity			0.6456	Tissue__TCGA-LUAD
45663	Tissue	1	274	5.094E-12	="NA"	106	Infinity			0.678	Tissue__TCGA-LUSC
64950	Tissue	1	617	9.85E-4	="NA"	106	Infinity			0.8813	Tissue__GTEx_normal
61204	Tissue	1	294	5.941E-5	="NA"	106	Infinity			0.6601	Tissue__TCGA-NORMAL
45660	Tissue	1	470	1.579E-8	="NA"	106	Infinity			0.6807	Tissue__TCGA-LUSC
66055	Tissue	1	358	3.529E-4	="NA"	106	Infinity			0.6603	Tissue__TCGA-NORMAL
45657	Tissue	1	54	8.554E-4	="NA"	106	Infinity			-0.6489	Tissue__TCGA-LUAD
53161	Tissue	1	564	2.592E-4	="NA"	106	Infinity			0.8809	Tissue__GTEx_normal
45654	Tissue	1	64	1.012E-6	="NA"	106	Infinity			0.6812	Tissue__TCGA-LUSC
61203	Tissue	1	324	3.529E-4	="NA"	107	Infinity			0.6599	Tissue__TCGA-NORMAL
45651	Tissue	1	45	3.211E-5	="NA"	107	Infinity			0.6816	Tissue__TCGA-LUSC
45648	Tissue	1	596	2.29E-4	="NA"	107	Infinity			0.6475	Tissue__TCGA-LUAD
45644	Tissue	1	622	3.211E-5	="NA"	107	Infinity			0.6816	Tissue__TCGA-LUSC
64508	Tissue	1	623	9.85E-4	="NA"	107	Infinity			0.8805	Tissue__GTEx_normal
48755	Tissue	2	712	5.608E-4	="NA"	107	Infinity			0.6835	Tissue__TCGA-LUSC
53744	Tissue	1	593	2.29E-4	="NA"	108	Infinity			0.6473	Tissue__TCGA-LUAD
45442	Tissue	1	48	6.175E-6	="NA"	108	Infinity			-0.6809	Tissue__TCGA-LUSC
45441	Tissue	1	676	5.608E-4	="NA"	108	Infinity			0.6832	Tissue__TCGA-LUSC
45438	Tissue	1	628	9.85E-4	="NA"	108	Infinity			0.8801	Tissue__GTEx_normal
45046	Tissue	1	351	3.529E-4	="NA"	108	Infinity			-0.6595	Tissue__TCGA-NORMAL
48663	Tissue	1	337	3.529E-4	="NA"	109	Infinity			0.6594	Tissue__TCGA-NORMAL
63713	Tissue	1	344	1.833E-6	="NA"	109	Infinity			-0.6446	Tissue__TCGA-LUAD
53245	Tissue	1	311	2.29E-4	="NA"	109	Infinity			0.6469	Tissue__TCGA-LUAD
44960	Tissue	1	42	5.094E-12	="NA"	109	Infinity			0.676	Tissue__TCGA-LUSC
51488	Tissue	1	617	9.85E-4	="NA"	109	Infinity			0.88	Tissue__GTEx_normal
51487	Tissue	1	573	2.592E-4	="NA"	109	Infinity			0.8795	Tissue__GTEx_normal
44959	Tissue	1	539	8.554E-4	="NA"	110	Infinity			0.6465	Tissue__TCGA-LUAD
49096	Tissue	1	307	3.529E-4	="NA"	110	Infinity			0.6592	Tissue__TCGA-NORMAL
64614	Tissue	1	535	1.833E-6	="NA"	110	Infinity			0.6438	Tissue__TCGA-LUAD
60229	Tissue	1	593	2.592E-4	="NA"	110	Infinity			0.8793	Tissue__GTEx_normal
44957	Tissue	1	137	6.175E-6	="NA"	110	Infinity			-0.6801	Tissue__TCGA-LUSC
64684	Tissue	1	384	2.635E-7	="NA"	110	Infinity			0.6437	Tissue__TCGA-LUAD
56207	Tissue	2	555	1.071E-5	="NA"	110	Infinity			0.6442	Tissue__TCGA-LUAD
56736	Tissue	1	291	3.529E-4	="NA"	110	Infinity			0.6592	Tissue__TCGA-NORMAL
51558	Tissue	1	305	1.833E-6	="NA"	111	Infinity			-0.6417	Tissue__TCGA-LUAD
64949	Tissue	2	721	5.608E-4	="NA"	111	Infinity			0.6816	Tissue__TCGA-LUSC
55515	Tissue	1	341	3.529E-4	="NA"	111	Infinity			0.6584	Tissue__TCGA-NORMAL
51670	Tissue	1	554	2.592E-4	="NA"	111	Infinity			0.8792	Tissue__GTEx_normal
61851	Tissue	1	549	6.028E-5	="NA"	111	Infinity			0.8787	Tissue__GTEx_normal
61413	Tissue	1	53	5.334E-5	="NA"	112	Infinity			0.6389	Tissue__TCGA-LUAD
54574	Tissue	1	559	2.592E-4	="NA"	112	Infinity			0.8785	Tissue__GTEx_normal
51515	Tissue	1	31	1.439E-4	="NA"	112	Infinity			0.6798	Tissue__TCGA-LUSC
61202	Tissue	1	257	3.529E-4	="NA"	112	Infinity			0.658	Tissue__TCGA-NORMAL
63712	Tissue	1	618	9.85E-4	="NA"	112	Infinity			0.8786	Tissue__GTEx_normal
49353	Tissue	1	67	1.833E-6	="NA"	112	Infinity			0.6384	Tissue__TCGA-LUAD
56206	Tissue	1	573	1.071E-5	="NA"	112	Infinity			0.6386	Tissue__TCGA-LUAD
44939	Tissue	1	569	8.554E-4	="NA"	113	Infinity			0.6398	Tissue__TCGA-LUAD
61201	Tissue	1	278	3.529E-4	="NA"	113	Infinity			0.6575	Tissue__TCGA-NORMAL
60492	Tissue	1	572	2.592E-4	="NA"	113	Infinity			0.8781	Tissue__GTEx_normal
64507	Tissue	1	647	9.85E-4	="NA"	113	Infinity			0.8784	Tissue__GTEx_normal
51099	Tissue	1	73	6.175E-6	="NA"	113	Infinity			0.6765	Tissue__TCGA-LUSC
52331	Tissue	1	35	1.833E-6	="NA"	113	Infinity			0.6361	Tissue__TCGA-LUAD
44869	Tissue	1	355	3.529E-4	="NA"	114	Infinity			0.6565	Tissue__TCGA-NORMAL
60228	Tissue	1	575	2.592E-4	="NA"	114	Infinity			0.8779	Tissue__GTEx_normal
57633	Tissue	1	96	2.635E-7	="NA"	114	Infinity			0.6355	Tissue__TCGA-LUAD
44866	Tissue	1	707	5.608E-4	="NA"	114	Infinity			0.6787	Tissue__TCGA-LUSC
45443	Tissue	1	410	3.122E-8	="NA"	115	Infinity			0.6346	Tissue__TCGA-LUAD
60589	Tissue	1	575	2.592E-4	="NA"	115	Infinity			0.8778	Tissue__GTEx_normal
52931	Tissue	1	596	9.85E-4	="NA"	115	Infinity			0.8779	Tissue__GTEx_normal
44864	Tissue	1	342	3.529E-4	="NA"	115	Infinity			0.6564	Tissue__TCGA-NORMAL
54725	Tissue	1	555	1.012E-6	="NA"	115	Infinity			0.675	Tissue__TCGA-LUSC
63252	Tissue	1	538	1.012E-6	="NA"	116	Infinity			0.6743	Tissue__TCGA-LUSC
53593	Tissue	1	638	9.85E-4	="NA"	116	Infinity			0.8777	Tissue__GTEx_normal
44861	Tissue	1	41	1.579E-8	="NA"	116	Infinity			-0.6733	Tissue__TCGA-LUSC
51557	Tissue	1	365	1.833E-6	="NA"	116	Infinity			-0.6347	Tissue__TCGA-LUAD
45687	Tissue	1	345	3.529E-4	="NA"	116	Infinity			0.6562	Tissue__TCGA-NORMAL
60792	Tissue	2	747	5.608E-4	="NA"	116	Infinity			0.6778	Tissue__TCGA-LUSC
46665	Tissue	1	54	1.439E-4	="NA"	117	Infinity			-0.6757	Tissue__TCGA-LUSC
46664	Tissue	1	561	2.592E-4	="NA"	117	Infinity			0.8772	Tissue__GTEx_normal
53002	Tissue	1	199	2.635E-7	="NA"	117	Infinity			0.6343	Tissue__TCGA-LUAD
60491	Tissue	1	593	9.85E-4	="NA"	117	Infinity			0.8773	Tissue__GTEx_normal
60227	Tissue	1	615	9.85E-4	="NA"	117	Infinity			0.8773	Tissue__GTEx_normal
65465	Tissue	1	93	8.554E-4	="NA"	117	Infinity			-0.6357	Tissue__TCGA-LUAD
44860	Tissue	1	333	3.529E-4	="NA"	117	Infinity			0.6559	Tissue__TCGA-NORMAL
48425	Tissue	1	328	3.529E-4	="NA"	118	Infinity			0.6553	Tissue__TCGA-NORMAL
53001	Tissue	1	328	2.635E-7	="NA"	118	Infinity			-0.6335	Tissue__TCGA-LUAD
66252	Tissue	1	307	3.529E-4	="NA"	118	Infinity			0.6553	Tissue__TCGA-NORMAL
53280	Tissue	1	639	5.334E-5	="NA"	118	Infinity			0.6346	Tissue__TCGA-LUAD
49501	Tissue	1	90	8.554E-4	="NA"	118	Infinity			-0.6352	Tissue__TCGA-LUAD
60791	Tissue	1	616	9.85E-4	="NA"	118	Infinity			0.8771	Tissue__GTEx_normal
45437	Tissue	1	596	2.592E-4	="NA"	118	Infinity			0.877	Tissue__GTEx_normal
52330	Tissue	1	100	5.608E-4	="NA"	118	Infinity			0.6758	Tissue__TCGA-LUSC
53743	Tissue	1	621	8.554E-4	="NA"	119	Infinity			0.6341	Tissue__TCGA-LUAD
55587	Tissue	1	587	2.592E-4	="NA"	119	Infinity			0.8769	Tissue__GTEx_normal
61200	Tissue	1	351	3.529E-4	="NA"	119	Infinity			0.6551	Tissue__TCGA-NORMAL
53542	Tissue	1	462	5.334E-5	="NA"	119	Infinity			-0.633	Tissue__TCGA-LUAD
54656	Tissue	1	604	3.211E-5	="NA"	119	Infinity			0.6729	Tissue__TCGA-LUSC
65491	Tissue	1	246	2.635E-7	="NA"	120	Infinity			-0.6307	Tissue__TCGA-LUAD
54573	Tissue	1	619	9.85E-4	="NA"	120	Infinity			0.8767	Tissue__GTEx_normal
65392	Tissue	1	338	3.529E-4	="NA"	120	Infinity			0.6549	Tissue__TCGA-NORMAL
54655	Tissue	1	628	1.439E-4	="NA"	120	Infinity			0.6732	Tissue__TCGA-LUSC
44843	Tissue	1	706	5.608E-4	="NA"	120	Infinity			0.6741	Tissue__TCGA-LUSC
44839	Tissue	2	54	1.833E-6	="NA"	120	Infinity			0.631	Tissue__TCGA-LUAD
59779	Tissue	1	454	5.334E-5	="NA"	120	Infinity			-0.6328	Tissue__TCGA-LUAD
56395	Tissue	1	613	9.85E-4	="NA"	121	Infinity			0.8766	Tissue__GTEx_normal
65707	Tissue	1	285	3.529E-4	="NA"	121	Infinity			0.6548	Tissue__TCGA-NORMAL
44838	Tissue	1	81	1.012E-6	="NA"	121	Infinity			0.6708	Tissue__TCGA-LUSC
44837	Tissue	1	286	1.579E-8	="NA"	121	Infinity			0.6698	Tissue__TCGA-LUSC
57632	Tissue	2	433	5.334E-5	="NA"	121	Infinity			0.6319	Tissue__TCGA-LUAD
63251	Tissue	1	555	6.175E-6	="NA"	122	Infinity			0.6708	Tissue__TCGA-LUSC
44817	Tissue	1	309	2.171E-10	="NA"	122	Infinity			0.6256	Tissue__TCGA-LUAD
44814	Tissue	1	336	3.529E-4	="NA"	122	Infinity			-0.6543	Tissue__TCGA-NORMAL
53160	Tissue	1	606	9.85E-4	="NA"	122	Infinity			0.8764	Tissue__GTEx_normal
45436	Tissue	1	599	2.592E-4	="NA"	122	Infinity			0.8763	Tissue__GTEx_normal
48202	Tissue	1	316	3.529E-4	="NA"	123	Infinity			0.6539	Tissue__TCGA-NORMAL
62182	Tissue	1	613	9.85E-4	="NA"	123	Infinity			0.8763	Tissue__GTEx_normal
52057	Tissue	1	516	5.334E-5	="NA"	123	Infinity			0.6288	Tissue__TCGA-LUAD
44798	Tissue	1	32	1.439E-4	="NA"	123	Infinity			-0.6722	Tissue__TCGA-LUSC
66104	Tissue	1	585	8.554E-4	="NA"	124	Infinity			0.6306	Tissue__TCGA-LUAD
44797	Tissue	1	333	5.334E-5	="NA"	124	Infinity			0.6285	Tissue__TCGA-LUAD
44776	Tissue	1	662	5.608E-4	="NA"	124	Infinity			0.6726	Tissue__TCGA-LUSC
54910	Tissue	1	322	3.529E-4	="NA"	124	Infinity			0.6535	Tissue__TCGA-NORMAL
65464	Tissue	1	536	1.071E-5	="NA"	124	Infinity			0.6276	Tissue__TCGA-LUAD
54878	Tissue	1	591	9.85E-4	="NA"	124	Infinity			0.8761	Tissue__GTEx_normal
50843	Tissue	1	171	6.175E-6	="NA"	125	Infinity			0.6693	Tissue__TCGA-LUSC
61199	Tissue	1	244	3.529E-4	="NA"	125	Infinity			0.6531	Tissue__TCGA-NORMAL
58038	Tissue	1	608	9.85E-4	="NA"	125	Infinity			0.8759	Tissue__GTEx_normal
48498	Tissue	2	731	5.608E-4	="NA"	125	Infinity			0.6722	Tissue__TCGA-LUSC
44747	Tissue	1	481	5.334E-5	="NA"	125	Infinity			-0.627	Tissue__TCGA-LUAD
61850	Tissue	1	591	2.592E-4	="NA"	125	Infinity			0.8757	Tissue__GTEx_normal
60790	Tissue	1	612	9.85E-4	="NA"	125	Infinity			0.8759	Tissue__GTEx_normal
44695	Tissue	1	576	1.071E-5	="NA"	125	Infinity			-0.6257	Tissue__TCGA-LUAD
44295	Tissue	1	486	1.012E-6	="NA"	126	Infinity			0.6677	Tissue__TCGA-LUSC
59998	Tissue	1	281	3.529E-4	="NA"	126	Infinity			0.653	Tissue__TCGA-NORMAL
44291	Tissue	1	548	1.071E-5	="NA"	126	Infinity			-0.6247	Tissue__TCGA-LUAD
54724	Tissue	1	702	5.608E-4	="NA"	126	Infinity			0.6719	Tissue__TCGA-LUSC
60226	Tissue	1	610	9.85E-4	="NA"	126	Infinity			0.8757	Tissue__GTEx_normal
64506	Tissue	1	574	2.592E-4	="NA"	126	Infinity			0.8756	Tissue__GTEx_normal
48424	Tissue	1	339	3.529E-4	="NA"	127	Infinity			0.6528	Tissue__TCGA-NORMAL
44277	Tissue	1	493	6.175E-6	="NA"	127	Infinity			0.6671	Tissue__TCGA-LUSC
64948	Tissue	1	585	2.592E-4	="NA"	127	Infinity			0.8751	Tissue__GTEx_normal
53541	Tissue	1	717	5.608E-4	="NA"	127	Infinity			0.6705	Tissue__TCGA-LUSC
63825	Tissue	1	505	1.833E-6	="NA"	127	Infinity			0.6243	Tissue__TCGA-LUAD
64505	Tissue	1	565	2.592E-4	="NA"	127	Infinity			0.8751	Tissue__GTEx_normal
53742	Tissue	1	566	8.554E-4	="NA"	128	Infinity			0.625	Tissue__TCGA-LUAD
66071	Tissue	1	550	1.012E-6	="NA"	128	Infinity			0.6663	Tissue__TCGA-LUSC
60490	Tissue	1	585	2.592E-4	="NA"	128	Infinity			0.875	Tissue__GTEx_normal
55514	Tissue	1	327	3.529E-4	="NA"	128	Infinity			0.6527	Tissue__TCGA-NORMAL
44212	Tissue	1	69	2.228E-6	="NA"	129	Infinity			0.8738	Tissue__GTEx_normal
44167	Tissue	1	311	3.529E-4	="NA"	129	Infinity			-0.6526	Tissue__TCGA-NORMAL
56687	Tissue	2	545	6.175E-6	="NA"	129	Infinity			0.6661	Tissue__TCGA-LUSC
44165	Tissue	1	626	9.85E-4	="NA"	129	Infinity			0.8749	Tissue__GTEx_normal
44064	Tissue	1	95	1.071E-5	="NA"	129	Infinity			-0.6241	Tissue__TCGA-LUAD
52549	Tissue	1	546	2.29E-4	="NA"	129	Infinity			0.6245	Tissue__TCGA-LUAD
44059	Tissue	1	635	5.608E-4	="NA"	129	Infinity			0.6684	Tissue__TCGA-LUSC
58067	Tissue	1	403	1.436E-9	="NA"	130	Infinity			0.6642	Tissue__TCGA-LUSC
56394	Tissue	1	587	9.85E-4	="NA"	130	Infinity			0.8748	Tissue__GTEx_normal
44025	Tissue	1	50	1.012E-6	="NA"	130	Infinity			-0.6647	Tissue__TCGA-LUSC
44024	Tissue	1	33	3.211E-5	="NA"	130	Infinity			0.6658	Tissue__TCGA-LUSC
44023	Tissue	1	354	3.529E-4	="NA"	130	Infinity			0.6522	Tissue__TCGA-NORMAL
43946	Tissue	1	35	1.66E-13	="NA"	130	Infinity			0.6633	Tissue__TCGA-LUSC
43941	Tissue	1	380	1.833E-6	="NA"	130	Infinity			-0.6235	Tissue__TCGA-LUAD
55586	Tissue	1	582	2.592E-4	="NA"	131	Infinity			0.8745	Tissue__GTEx_normal
63711	Tissue	1	629	9.85E-4	="NA"	131	Infinity			0.8746	Tissue__GTEx_normal
46777	Tissue	1	369	3.529E-4	="NA"	131	Infinity			0.6518	Tissue__TCGA-NORMAL
43541	Tissue	1	93	5.608E-4	="NA"	131	Infinity			-0.6666	Tissue__TCGA-LUSC
43540	Tissue	1	391	2.635E-7	="NA"	131	Infinity			0.6227	Tissue__TCGA-LUAD
43532	Tissue	1	87	2.635E-7	="NA"	132	Infinity			-0.6222	Tissue__TCGA-LUAD
43531	Tissue	1	578	8.554E-4	="NA"	132	Infinity			0.6237	Tissue__TCGA-LUAD
54654	Tissue	1	621	1.439E-4	="NA"	132	Infinity			0.6649	Tissue__TCGA-LUSC
43514	Tissue	1	340	3.529E-4	="NA"	132	Infinity			-0.651	Tissue__TCGA-NORMAL
60789	Tissue	1	594	2.592E-4	="NA"	132	Infinity			0.8738	Tissue__GTEx_normal
51486	Tissue	1	621	9.85E-4	="NA"	132	Infinity			0.8745	Tissue__GTEx_normal
48682	Tissue	1	60	8.554E-4	="NA"	133	Infinity			-0.6236	Tissue__TCGA-LUAD
43479	Tissue	1	303	3.529E-4	="NA"	133	Infinity			0.6497	Tissue__TCGA-NORMAL
61738	Tissue	1	638	9.85E-4	="NA"	133	Infinity			0.8738	Tissue__GTEx_normal
51098	Tissue	1	635	5.334E-5	="NA"	133	Infinity			0.6229	Tissue__TCGA-LUAD
57631	Tissue	1	571	6.175E-6	="NA"	133	Infinity			0.6644	Tissue__TCGA-LUSC
59277	Tissue	1	356	3.529E-4	="NA"	134	Infinity			-0.6496	Tissue__TCGA-NORMAL
48428	Tissue	1	55	1.012E-6	="NA"	134	Infinity			-0.6637	Tissue__TCGA-LUSC
64504	Tissue	1	628	9.85E-4	="NA"	134	Infinity			0.8737	Tissue__GTEx_normal
61849	Tissue	1	574	2.592E-4	="NA"	134	Infinity			0.8736	Tissue__GTEx_normal
59661	Tissue	1	562	5.334E-5	="NA"	134	Infinity			0.6227	Tissue__TCGA-LUAD
50783	Tissue	1	643	5.608E-4	="NA"	135	Infinity			0.6647	Tissue__TCGA-LUSC
43459	Tissue	1	90	1.833E-6	="NA"	135	Infinity			-0.6217	Tissue__TCGA-LUAD
48662	Tissue	1	307	3.529E-4	="NA"	135	Infinity			0.6493	Tissue__TCGA-NORMAL
43457	Tissue	1	487	1.393E-7	="NA"	135	Infinity			0.6633	Tissue__TCGA-LUSC
65326	Tissue	1	586	2.592E-4	="NA"	135	Infinity			0.8735	Tissue__GTEx_normal
43424	Tissue	1	31	1.393E-7	="NA"	135	Infinity			0.6633	Tissue__TCGA-LUSC
43423	Tissue	1	650	5.608E-4	="NA"	136	Infinity			0.6646	Tissue__TCGA-LUSC
55819	Tissue	1	579	2.592E-4	="NA"	136	Infinity			0.8733	Tissue__GTEx_normal
43420	Tissue	1	332	3.529E-4	="NA"	136	Infinity			-0.6489	Tissue__TCGA-NORMAL
43326	Tissue	1	105	5.334E-5	="NA"	136	Infinity			-0.622	Tissue__TCGA-LUAD
65490	Tissue	1	419	1.071E-5	="NA"	137	Infinity			-0.6206	Tissue__TCGA-LUAD
52374	Tissue	1	555	1.012E-6	="NA"	137	Infinity			0.6616	Tissue__TCGA-LUSC
54653	Tissue	2	690	5.608E-4	="NA"	137	Infinity			0.6645	Tissue__TCGA-LUSC
43226	Tissue	1	39	1.833E-6	="NA"	137	Infinity			-0.6196	Tissue__TCGA-LUAD
60225	Tissue	1	624	9.85E-4	="NA"	137	Infinity			0.8733	Tissue__GTEx_normal
55513	Tissue	1	315	3.529E-4	="NA"	137	Infinity			0.6484	Tissue__TCGA-NORMAL
61848	Tissue	1	600	2.592E-4	="NA"	137	Infinity			0.8732	Tissue__GTEx_normal
52123	Tissue	1	595	6.175E-6	="NA"	138	Infinity			0.6604	Tissue__TCGA-LUSC
53000	Tissue	1	336	1.071E-5	="NA"	138	Infinity			0.6186	Tissue__TCGA-LUAD
53244	Tissue	2	728	5.608E-4	="NA"	138	Infinity			0.6635	Tissue__TCGA-LUSC
54333	Tissue	1	262	1.436E-9	="NA"	138	Infinity			0.6582	Tissue__TCGA-LUSC
43214	Tissue	1	91	1.012E-6	="NA"	138	Infinity			-0.6603	Tissue__TCGA-LUSC
43210	Tissue	1	366	3.529E-4	="NA"	138	Infinity			0.6483	Tissue__TCGA-NORMAL
60788	Tissue	1	559	2.592E-4	="NA"	138	Infinity			0.873	Tissue__GTEx_normal
63232	Tissue	1	629	5.334E-5	="NA"	139	Infinity			0.6185	Tissue__TCGA-LUAD
48303	Tissue	2	563	8.554E-4	="NA"	139	Infinity			0.6195	Tissue__TCGA-LUAD
43172	Tissue	1	404	1.436E-9	="NA"	139	Infinity			0.6575	Tissue__TCGA-LUSC
65706	Tissue	1	326	3.529E-4	="NA"	139	Infinity			-0.6478	Tissue__TCGA-NORMAL
53540	Tissue	1	490	1.071E-5	="NA"	139	Infinity			0.6183	Tissue__TCGA-LUAD
43168	Tissue	1	108	2.965E-9	="NA"	139	Infinity			-0.6147	Tissue__TCGA-LUAD
53159	Tissue	1	564	6.028E-5	="NA"	139	Infinity			0.8727	Tissue__GTEx_normal
65705	Tissue	1	276	5.941E-5	="NA"	140	Infinity			0.6458	Tissue__TCGA-NORMAL
43161	Tissue	1	358	3.529E-4	="NA"	140	Infinity			0.6463	Tissue__TCGA-NORMAL
64503	Tissue	1	590	9.85E-4	="NA"	140	Infinity			0.8728	Tissue__GTEx_normal
43148	Tissue	1	710	5.608E-4	="NA"	140	Infinity			0.6615	Tissue__TCGA-LUSC
44694	Tissue	1	392	2.635E-7	="NA"	140	Infinity			-0.6168	Tissue__TCGA-LUAD
53741	Tissue	1	555	2.29E-4	="NA"	141	Infinity			0.6174	Tissue__TCGA-LUAD
44773	Tissue	1	647	5.608E-4	="NA"	141	Infinity			0.661	Tissue__TCGA-LUSC
52815	Tissue	1	503	6.175E-6	="NA"	141	Infinity			0.6585	Tissue__TCGA-LUSC
43144	Tissue	1	316	5.941E-5	="NA"	141	Infinity			-0.6451	Tissue__TCGA-NORMAL
66251	Tissue	1	335	3.529E-4	="NA"	141	Infinity			0.6456	Tissue__TCGA-NORMAL
64502	Tissue	1	608	9.85E-4	="NA"	141	Infinity			0.8724	Tissue__GTEx_normal
61847	Tissue	1	623	9.85E-4	="NA"	141	Infinity			0.8724	Tissue__GTEx_normal
43087	Tissue	1	600	1.439E-4	="NA"	142	Infinity			0.6593	Tissue__TCGA-LUSC
43086	Tissue	1	61	1.833E-6	="NA"	142	Infinity			0.6147	Tissue__TCGA-LUAD
64947	Tissue	1	564	2.592E-4	="NA"	142	Infinity			0.8721	Tissue__GTEx_normal
43083	Tissue	1	355	3.529E-4	="NA"	142	Infinity			0.6446	Tissue__TCGA-NORMAL
43012	Tissue	1	63	2.635E-7	="NA"	142	Infinity			-0.6146	Tissue__TCGA-LUAD
54137	Tissue	1	606	9.85E-4	="NA"	142	Infinity			0.8722	Tissue__GTEx_normal
63511	Tissue	1	396	1.006E-10	="NA"	142	Infinity			0.6548	Tissue__TCGA-LUSC
46800	Tissue	1	76	5.334E-5	="NA"	143	Infinity			0.6156	Tissue__TCGA-LUAD
56649	Tissue	1	279	8.554E-4	="NA"	143	Infinity			0.6169	Tissue__TCGA-LUAD
54305	Tissue	1	317	3.529E-4	="NA"	143	Infinity			0.6441	Tissue__TCGA-NORMAL
65704	Tissue	1	276	3.529E-4	="NA"	143	Infinity			0.6441	Tissue__TCGA-NORMAL
45951	Tissue	1	576	2.592E-4	="NA"	143	Infinity			0.8712	Tissue__GTEx_normal
42949	Tissue	1	727	5.608E-4	="NA"	143	Infinity			0.6587	Tissue__TCGA-LUSC
65325	Tissue	1	357	1.071E-5	="NA"	143	Infinity			-0.6147	Tissue__TCGA-LUAD
50243	Tissue	1	626	8.554E-4	="NA"	143	Infinity			-0.6169	Tissue__TCGA-LUAD
60787	Tissue	1	577	9.85E-4	="NA"	143	Infinity			0.8721	Tissue__GTEx_normal
57630	Tissue	1	528	2.29E-4	="NA"	143	Infinity			0.6168	Tissue__TCGA-LUAD
49962	Tissue	1	472	2.635E-7	="NA"	144	Infinity			0.6137	Tissue__TCGA-LUAD
50837	Tissue	1	345	1.436E-9	="NA"	144	Infinity			0.6532	Tissue__TCGA-LUSC
44836	Tissue	1	380	1.012E-6	="NA"	144	Infinity			0.656	Tissue__TCGA-LUSC
42842	Tissue	1	188	1.439E-4	="NA"	144	Infinity			-0.658	Tissue__TCGA-LUSC
42841	Tissue	1	324	3.529E-4	="NA"	144	Infinity			0.6439	Tissue__TCGA-NORMAL
64501	Tissue	1	598	9.85E-4	="NA"	144	Infinity			0.871	Tissue__GTEx_normal
44772	Tissue	1	651	5.608E-4	="NA"	145	Infinity			0.6564	Tissue__TCGA-LUSC
43530	Tissue	1	46	2.635E-7	="NA"	145	Infinity			0.6122	Tissue__TCGA-LUAD
58421	Tissue	1	604	9.85E-4	="NA"	145	Infinity			0.8709	Tissue__GTEx_normal
53560	Tissue	1	605	8.554E-4	="NA"	145	Infinity			0.6147	Tissue__TCGA-LUAD
42679	Tissue	1	560	6.175E-6	="NA"	145	Infinity			0.6538	Tissue__TCGA-LUSC
52548	Tissue	3	105	3.211E-5	="NA"	145	Infinity			0.6544	Tissue__TCGA-LUSC
65391	Tissue	2	446	5.334E-5	="NA"	145	Infinity			-0.6139	Tissue__TCGA-LUAD
61737	Tissue	1	452	1.071E-5	="NA"	145	Infinity			-0.6137	Tissue__TCGA-LUAD
54327	Tissue	1	325	3.529E-4	="NA"	145	Infinity			0.6438	Tissue__TCGA-NORMAL
66054	Tissue	1	442	2.592E-4	="NA"	145	Infinity			0.8708	Tissue__GTEx_normal
49545	Tissue	1	547	5.608E-4	="NA"	146	Infinity			0.6562	Tissue__TCGA-LUSC
42445	Tissue	1	322	3.529E-4	="NA"	146	Infinity			0.6437	Tissue__TCGA-NORMAL
42441	Tissue	1	367	1.071E-5	="NA"	146	Infinity			0.6136	Tissue__TCGA-LUAD
42379	Tissue	1	403	1.579E-8	="NA"	146	Infinity			0.652	Tissue__TCGA-LUSC
53158	Tissue	1	565	2.592E-4	="NA"	146	Infinity			0.8706	Tissue__GTEx_normal
58066	Tissue	1	402	1.006E-10	="NA"	147	Infinity			0.6501	Tissue__TCGA-LUSC
62181	Tissue	1	601	9.85E-4	="NA"	147	Infinity			0.8704	Tissue__GTEx_normal
52410	Tissue	1	315	3.529E-4	="NA"	147	Infinity			0.6435	Tissue__TCGA-NORMAL
42377	Tissue	1	72	1.833E-6	="NA"	147	Infinity			-0.6106	Tissue__TCGA-LUAD
42375	Tissue	1	128	6.175E-6	="NA"	147	Infinity			-0.6525	Tissue__TCGA-LUSC
42368	Tissue	2	135	2.29E-4	="NA"	147	Infinity			-0.6117	Tissue__TCGA-LUAD
51485	Tissue	1	593	2.592E-4	="NA"	147	Infinity			0.8703	Tissue__GTEx_normal
42365	Tissue	2	349	3.529E-4	="NA"	148	Infinity			0.6434	Tissue__TCGA-NORMAL
43456	Tissue	1	275	3.529E-4	="NA"	148	Infinity			0.6434	Tissue__TCGA-NORMAL
60489	Tissue	1	627	9.85E-4	="NA"	148	Infinity			0.8701	Tissue__GTEx_normal
61948	Tissue	1	552	2.29E-4	="NA"	148	Infinity			0.6116	Tissue__TCGA-LUAD
42361	Tissue	1	116	5.608E-4	="NA"	148	Infinity			0.6548	Tissue__TCGA-LUSC
52071	Tissue	1	286	2.635E-7	="NA"	149	Infinity			0.6097	Tissue__TCGA-LUAD
42360	Tissue	1	622	3.211E-5	="NA"	149	Infinity			0.6524	Tissue__TCGA-LUSC
42358	Tissue	1	132	1.071E-5	="NA"	149	Infinity			0.6104	Tissue__TCGA-LUAD
42355	Tissue	1	298	3.529E-4	="NA"	149	Infinity			0.6428	Tissue__TCGA-NORMAL
60224	Tissue	1	616	9.85E-4	="NA"	149	Infinity			0.8699	Tissue__GTEx_normal
42324	Tissue	1	391	2.592E-4	="NA"	149	Infinity			0.8698	Tissue__GTEx_normal
53157	Tissue	1	511	1.236E-5	="NA"	149	Infinity			0.8692	Tissue__GTEx_normal
47456	Tissue	1	391	1.833E-6	="NA"	149	Infinity			-0.6098	Tissue__TCGA-LUAD
53740	Tissue	1	603	8.554E-4	="NA"	150	Infinity			0.6112	Tissue__TCGA-LUAD
42322	Tissue	1	607	6.175E-6	="NA"	150	Infinity			0.6508	Tissue__TCGA-LUSC
42308	Tissue	1	637	9.85E-4	="NA"	150	Infinity			0.8696	Tissue__GTEx_normal
43419	Tissue	1	365	3.529E-4	="NA"	150	Infinity			-0.6426	Tissue__TCGA-NORMAL
47455	Tissue	1	638	9.85E-4	="NA"	150	Infinity			0.8696	Tissue__GTEx_normal
52070	Tissue	1	359	1.833E-6	="NA"	151	Infinity			0.6096	Tissue__TCGA-LUAD
63164	Tissue	1	343	3.529E-4	="NA"	151	Infinity			-0.6422	Tissue__TCGA-NORMAL
42284	Tissue	2	87	1.393E-7	="NA"	151	Infinity			-0.6494	Tissue__TCGA-LUSC
66391	Tissue	1	33	6.028E-5	="NA"	151	Infinity			0.8686	Tissue__GTEx_normal
42282	Tissue	1	537	1.012E-6	="NA"	151	Infinity			0.6495	Tissue__TCGA-LUSC
45435	Tissue	1	588	2.592E-4	="NA"	151	Infinity			0.8687	Tissue__GTEx_normal
53654	Tissue	1	176	3.529E-4	="NA"	152	Infinity			-0.6419	Tissue__TCGA-NORMAL
56686	Tissue	1	679	5.608E-4	="NA"	152	Infinity			0.6519	Tissue__TCGA-LUSC
61947	Tissue	1	340	1.833E-6	="NA"	152	Infinity			0.6088	Tissue__TCGA-LUAD
49216	Tissue	1	590	2.592E-4	="NA"	152	Infinity			0.8686	Tissue__GTEx_normal
42193	Tissue	1	308	5.941E-5	="NA"	153	Infinity			0.641	Tissue__TCGA-NORMAL
42189	Tissue	1	331	3.529E-4	="NA"	153	Infinity			-0.6416	Tissue__TCGA-NORMAL
65390	Tissue	2	280	1.833E-6	="NA"	153	Infinity			0.6076	Tissue__TCGA-LUAD
54136	Tissue	1	564	2.592E-4	="NA"	153	Infinity			0.8685	Tissue__GTEx_normal
54135	Tissue	1	588	2.592E-4	="NA"	153	Infinity			0.8685	Tissue__GTEx_normal
57629	Tissue	1	694	5.608E-4	="NA"	153	Infinity			0.6511	Tissue__TCGA-LUSC
45434	Tissue	1	601	9.85E-4	="NA"	153	Infinity			0.8686	Tissue__GTEx_normal
52122	Tissue	1	76	1.439E-4	="NA"	154	Infinity			0.6496	Tissue__TCGA-LUSC
42171	Tissue	1	94	1.833E-6	="NA"	154	Infinity			-0.6067	Tissue__TCGA-LUAD
65703	Tissue	1	319	5.941E-5	="NA"	154	Infinity			0.6404	Tissue__TCGA-NORMAL
42170	Tissue	1	399	1.071E-5	="NA"	154	Infinity			-0.6072	Tissue__TCGA-LUAD
66338	Tissue	1	313	3.529E-4	="NA"	154	Infinity			0.6408	Tissue__TCGA-NORMAL
42090	Tissue	1	614	9.85E-4	="NA"	154	Infinity			0.8685	Tissue__GTEx_normal
53739	Tissue	1	618	8.554E-4	="NA"	155	Infinity			0.6087	Tissue__TCGA-LUAD
48497	Tissue	2	659	1.439E-4	="NA"	155	Infinity			0.6482	Tissue__TCGA-LUSC
42321	Tissue	1	329	5.941E-5	="NA"	155	Infinity			0.6403	Tissue__TCGA-NORMAL
61736	Tissue	1	642	9.85E-4	="NA"	155	Infinity			0.8684	Tissue__GTEx_normal
65324	Tissue	1	575	2.592E-4	="NA"	155	Infinity			0.8679	Tissue__GTEx_normal
50242	Tissue	1	718	5.608E-4	="NA"	155	Infinity			-0.6494	Tissue__TCGA-LUSC
42008	Tissue	1	344	1.833E-6	="NA"	155	Infinity			0.6064	Tissue__TCGA-LUAD
42003	Tissue	1	346	3.529E-4	="NA"	156	Infinity			0.6396	Tissue__TCGA-NORMAL
41998	Tissue	1	354	1.071E-5	="NA"	156	Infinity			0.6062	Tissue__TCGA-LUAD
43085	Tissue	1	49	3.122E-8	="NA"	156	Infinity			0.6048	Tissue__TCGA-LUAD
52547	Tissue	2	100	5.608E-4	="NA"	156	Infinity			0.6487	Tissue__TCGA-LUSC
65323	Tissue	1	575	2.592E-4	="NA"	156	Infinity			0.8678	Tissue__GTEx_normal
47454	Tissue	1	624	9.85E-4	="NA"	156	Infinity			0.8679	Tissue__GTEx_normal
63250	Tissue	1	587	6.175E-6	="NA"	157	Infinity			0.6452	Tissue__TCGA-LUSC
53738	Tissue	1	552	2.29E-4	="NA"	157	Infinity			0.6056	Tissue__TCGA-LUAD
49933	Tissue	1	596	5.334E-5	="NA"	157	Infinity			0.6055	Tissue__TCGA-LUAD
50836	Tissue	1	350	1.436E-9	="NA"	157	Infinity			0.644	Tissue__TCGA-LUSC
45748	Tissue	1	490	2.635E-7	="NA"	157	Infinity			0.6043	Tissue__TCGA-LUAD
64500	Tissue	1	601	9.85E-4	="NA"	157	Infinity			0.8678	Tissue__GTEx_normal
41987	Tissue	1	323	3.529E-4	="NA"	157	Infinity			0.6395	Tissue__TCGA-NORMAL
50762	Tissue	1	328	3.529E-4	="NA"	158	Infinity			0.6389	Tissue__TCGA-NORMAL
58420	Tissue	1	627	9.85E-4	="NA"	158	Infinity			0.8676	Tissue__GTEx_normal
41953	Tissue	2	663	5.608E-4	="NA"	158	Infinity			0.6474	Tissue__TCGA-LUSC
41915	Tissue	1	80	1.439E-4	="NA"	158	Infinity			-0.6457	Tissue__TCGA-LUSC
66053	Tissue	1	397	1.236E-5	="NA"	158	Infinity			0.8671	Tissue__GTEx_normal
62860	Tissue	1	331	3.122E-8	="NA"	158	Infinity			0.6033	Tissue__TCGA-LUAD
66079	Tissue	1	54	2.29E-4	="NA"	159	Infinity			-0.6046	Tissue__TCGA-LUAD
46147	Tissue	1	722	5.608E-4	="NA"	159	Infinity			0.6471	Tissue__TCGA-LUSC
41906	Tissue	1	303	5.941E-5	="NA"	159	Infinity			0.6381	Tissue__TCGA-NORMAL
56435	Tissue	1	300	3.529E-4	="NA"	159	Infinity			0.6387	Tissue__TCGA-NORMAL
45433	Tissue	1	627	9.85E-4	="NA"	159	Infinity			0.8675	Tissue__GTEx_normal
45432	Tissue	1	605	9.85E-4	="NA"	159	Infinity			0.8675	Tissue__GTEx_normal
49557	Tissue	1	363	1.833E-6	="NA"	160	Infinity			0.6031	Tissue__TCGA-LUAD
53728	Tissue	1	43	3.211E-5	="NA"	160	Infinity			-0.6447	Tissue__TCGA-LUSC
59276	Tissue	1	274	3.529E-4	="NA"	160	Infinity			0.6381	Tissue__TCGA-NORMAL
41871	Tissue	1	297	5.941E-5	="NA"	160	Infinity			0.6378	Tissue__TCGA-NORMAL
45431	Tissue	1	610	9.85E-4	="NA"	160	Infinity			0.8672	Tissue__GTEx_normal
43465	Tissue	1	335	3.529E-4	="NA"	161	Infinity			-0.6377	Tissue__TCGA-NORMAL
59028	Tissue	1	449	1.071E-5	="NA"	161	Infinity			0.603	Tissue__TCGA-LUAD
41861	Tissue	2	703	5.608E-4	="NA"	161	Infinity			0.6454	Tissue__TCGA-LUSC
54134	Tissue	1	560	6.028E-5	="NA"	161	Infinity			0.8661	Tissue__GTEx_normal
60881	Tissue	1	33	1.462E-21	="NA"	161	Infinity			-0.8626	Tissue__GTEx_normal
41575	Tissue	2	44	8.554E-4	="NA"	161	Infinity			-0.6042	Tissue__TCGA-LUAD
41573	Tissue	1	183	1.833E-6	="NA"	162	Infinity			0.6015	Tissue__TCGA-LUAD
65702	Tissue	1	340	3.529E-4	="NA"	162	Infinity			-0.6376	Tissue__TCGA-NORMAL
41572	Tissue	1	228	9.85E-4	="NA"	162	Infinity			0.8668	Tissue__GTEx_normal
41566	Tissue	1	408	1.071E-5	="NA"	162	Infinity			0.6025	Tissue__TCGA-LUAD
64499	Tissue	1	579	2.592E-4	="NA"	162	Infinity			0.8661	Tissue__GTEx_normal
41188	Tissue	2	712	5.608E-4	="NA"	162	Infinity			0.6449	Tissue__TCGA-LUSC
46663	Tissue	1	591	9.85E-4	="NA"	163	Infinity			0.8661	Tissue__GTEx_normal
63456	Tissue	1	285	3.529E-4	="NA"	163	Infinity			0.6374	Tissue__TCGA-NORMAL
53656	Tissue	1	58	3.211E-5	="NA"	163	Infinity			0.6437	Tissue__TCGA-LUSC
66337	Tissue	1	319	1.236E-5	="NA"	163	Infinity			0.8657	Tissue__GTEx_normal
41123	Tissue	1	181	5.334E-5	="NA"	163	Infinity			-0.6011	Tissue__TCGA-LUAD
65322	Tissue	1	560	2.592E-4	="NA"	163	Infinity			0.866	Tissue__GTEx_normal
41121	Tissue	1	726	5.608E-4	="NA"	163	Infinity			0.6446	Tissue__TCGA-LUSC
47453	Tissue	1	630	9.85E-4	="NA"	163	Infinity			0.8661	Tissue__GTEx_normal
62180	Tissue	1	613	9.85E-4	="NA"	164	Infinity			0.866	Tissue__GTEx_normal
64946	Tissue	1	560	2.592E-4	="NA"	164	Infinity			0.8659	Tissue__GTEx_normal
41044	Tissue	1	136	5.334E-5	="NA"	164	Infinity			0.601	Tissue__TCGA-LUAD
41028	Tissue	1	347	3.529E-4	="NA"	164	Infinity			-0.6372	Tissue__TCGA-NORMAL
41122	Tissue	1	233	3.122E-8	="NA"	164	Infinity			-0.6003	Tissue__TCGA-LUAD
50241	Tissue	1	685	1.439E-4	="NA"	164	Infinity			0.6438	Tissue__TCGA-LUSC
50240	Tissue	1	728	5.608E-4	="NA"	164	Infinity			0.6441	Tissue__TCGA-LUSC
40969	Tissue	1	180	1.439E-4	="NA"	165	Infinity			0.6437	Tissue__TCGA-LUSC
40965	Tissue	1	104	2.29E-4	="NA"	165	Infinity			-0.6007	Tissue__TCGA-LUAD
63710	Tissue	1	579	2.592E-4	="NA"	165	Infinity			0.8655	Tissue__GTEx_normal
42451	Tissue	1	294	3.529E-4	="NA"	165	Infinity			0.6355	Tissue__TCGA-NORMAL
65463	Tissue	1	423	5.334E-5	="NA"	165	Infinity			0.6006	Tissue__TCGA-LUAD
40944	Tissue	1	44	2.29E-4	="NA"	165	Infinity			-0.6007	Tissue__TCGA-LUAD
40941	Tissue	1	481	1.579E-8	="NA"	166	Infinity			0.6409	Tissue__TCGA-LUSC
46133	Tissue	1	261	5.941E-5	="NA"	166	Infinity			0.6343	Tissue__TCGA-NORMAL
40934	Tissue	1	40	5.334E-5	="NA"	166	Infinity			0.6004	Tissue__TCGA-LUAD
40933	Tissue	1	343	3.529E-4	="NA"	166	Infinity			0.6352	Tissue__TCGA-NORMAL
60488	Tissue	1	580	2.592E-4	="NA"	166	Infinity			0.8653	Tissue__GTEx_normal
40908	Tissue	1	313	3.529E-4	="NA"	166	Infinity			0.6352	Tissue__TCGA-NORMAL
40851	Tissue	1	64	1.439E-4	="NA"	166	Infinity			-0.6422	Tissue__TCGA-LUSC
47452	Tissue	1	623	9.85E-4	="NA"	166	Infinity			0.8655	Tissue__GTEx_normal
40847	Tissue	1	138	5.608E-4	="NA"	167	Infinity			0.6424	Tissue__TCGA-LUSC
56393	Tissue	1	618	9.85E-4	="NA"	167	Infinity			0.8651	Tissue__GTEx_normal
40846	Tissue	1	337	3.529E-4	="NA"	167	Infinity			0.6342	Tissue__TCGA-NORMAL
40843	Tissue	1	45	1.436E-9	="NA"	167	Infinity			-0.64	Tissue__TCGA-LUSC
52930	Tissue	1	568	2.592E-4	="NA"	167	Infinity			0.865	Tissue__GTEx_normal
40842	Tissue	1	83	1.439E-4	="NA"	167	Infinity			-0.6421	Tissue__TCGA-LUSC
46234	Tissue	1	53	8.554E-4	="NA"	167	Infinity			-0.6006	Tissue__TCGA-LUAD
53279	Tissue	1	49	1.071E-5	="NA"	167	Infinity			0.5998	Tissue__TCGA-LUAD
53305	Tissue	1	143	5.334E-5	="NA"	167	Infinity			0.6003	Tissue__TCGA-LUAD
52929	Tissue	1	578	2.592E-4	="NA"	168	Infinity			0.8643	Tissue__GTEx_normal
49961	Tissue	2	496	2.635E-7	="NA"	168	Infinity			0.5991	Tissue__TCGA-LUAD
52358	Tissue	1	658	1.439E-4	="NA"	168	Infinity			0.642	Tissue__TCGA-LUSC
54133	Tissue	1	605	9.85E-4	="NA"	168	Infinity			0.8649	Tissue__GTEx_normal
40839	Tissue	1	239	3.529E-4	="NA"	168	Infinity			0.6337	Tissue__TCGA-NORMAL
40804	Tissue	1	354	3.529E-4	="NA"	169	Infinity			-0.6336	Tissue__TCGA-NORMAL
45643	Tissue	1	290	5.941E-5	="NA"	169	Infinity			0.6334	Tissue__TCGA-NORMAL
44956	Tissue	1	189	3.211E-5	="NA"	169	Infinity			-0.6416	Tissue__TCGA-LUSC
61846	Tissue	1	372	1.071E-5	="NA"	169	Infinity			-0.5992	Tissue__TCGA-LUAD
51484	Tissue	1	594	2.592E-4	="NA"	169	Infinity			0.8637	Tissue__GTEx_normal
66250	Tissue	1	299	3.529E-4	="NA"	170	Infinity			0.6326	Tissue__TCGA-NORMAL
65321	Tissue	1	558	2.592E-4	="NA"	170	Infinity			0.8632	Tissue__GTEx_normal
64498	Tissue	1	627	9.85E-4	="NA"	170	Infinity			0.8637	Tissue__GTEx_normal
40800	Tissue	1	695	5.608E-4	="NA"	170	Infinity			0.642	Tissue__TCGA-LUSC
43940	Tissue	1	403	1.833E-6	="NA"	170	Infinity			-0.5988	Tissue__TCGA-LUAD
53737	Tissue	1	611	8.554E-4	="NA"	171	Infinity			0.5997	Tissue__TCGA-LUAD
66249	Tissue	1	317	3.529E-4	="NA"	171	Infinity			0.6318	Tissue__TCGA-NORMAL
40769	Tissue	1	722	5.608E-4	="NA"	171	Infinity			0.6418	Tissue__TCGA-LUSC
40746	Tissue	1	178	1.833E-6	="NA"	171	Infinity			0.5981	Tissue__TCGA-LUAD
51669	Tissue	1	558	2.592E-4	="NA"	171	Infinity			0.8631	Tissue__GTEx_normal
40663	Tissue	1	294	5.608E-4	="NA"	171	Infinity			-0.6418	Tissue__TCGA-LUSC
49511	Tissue	1	93	3.211E-5	="NA"	172	Infinity			-0.6401	Tissue__TCGA-LUSC
40660	Tissue	1	312	3.529E-4	="NA"	172	Infinity			0.6316	Tissue__TCGA-NORMAL
44164	Tissue	1	607	9.85E-4	="NA"	172	Infinity			0.8631	Tissue__GTEx_normal
49077	Tissue	1	622	9.85E-4	="NA"	172	Infinity			0.8631	Tissue__GTEx_normal
45430	Tissue	2	716	5.608E-4	="NA"	172	Infinity			0.6417	Tissue__TCGA-LUSC
51483	Tissue	1	579	2.592E-4	="NA"	172	Infinity			0.863	Tissue__GTEx_normal
43939	Tissue	1	300	1.833E-6	="NA"	172	Infinity			0.5979	Tissue__TCGA-LUAD
55832	Tissue	2	666	1.439E-4	="NA"	173	Infinity			0.6407	Tissue__TCGA-LUSC
58065	Tissue	1	388	1.436E-9	="NA"	173	Infinity			0.6391	Tissue__TCGA-LUSC
40639	Tissue	1	41	8.554E-4	="NA"	173	Infinity			-0.5991	Tissue__TCGA-LUAD
40638	Tissue	1	326	3.529E-4	="NA"	173	Infinity			0.6315	Tissue__TCGA-NORMAL
56767	Tissue	1	57	6.175E-6	="NA"	173	Infinity			0.6399	Tissue__TCGA-LUSC
40610	Tissue	1	66	1.439E-4	="NA"	173	Infinity			-0.6407	Tissue__TCGA-LUSC
65320	Tissue	1	335	1.833E-6	="NA"	173	Infinity			-0.5977	Tissue__TCGA-LUAD
45429	Tissue	1	644	9.85E-4	="NA"	173	Infinity			0.863	Tissue__GTEx_normal
58037	Tissue	1	626	9.85E-4	="NA"	174	Infinity			0.8628	Tissue__GTEx_normal
53655	Tissue	1	58	6.175E-6	="NA"	174	Infinity			-0.6398	Tissue__TCGA-LUSC
40608	Tissue	1	452	1.393E-7	="NA"	174	Infinity			0.6393	Tissue__TCGA-LUSC
45656	Tissue	1	51	1.579E-8	="NA"	174	Infinity			-0.6392	Tissue__TCGA-LUSC
53304	Tissue	1	93	1.833E-6	="NA"	174	Infinity			0.5976	Tissue__TCGA-LUAD
40606	Tissue	1	293	3.529E-4	="NA"	174	Infinity			0.6314	Tissue__TCGA-NORMAL
56392	Tissue	1	607	9.85E-4	="NA"	175	Infinity			0.8627	Tissue__GTEx_normal
50130	Tissue	1	75	1.833E-6	="NA"	175	Infinity			-0.5975	Tissue__TCGA-LUAD
40567	Tissue	1	121	6.175E-6	="NA"	175	Infinity			-0.6395	Tissue__TCGA-LUSC
60904	Tissue	1	321	3.529E-4	="NA"	175	Infinity			0.631	Tissue__TCGA-NORMAL
40566	Tissue	2	173	1.393E-7	="NA"	176	Infinity			0.6375	Tissue__TCGA-LUSC
43082	Tissue	1	365	3.529E-4	="NA"	176	Infinity			0.6308	Tissue__TCGA-NORMAL
40203	Tissue	1	161	3.211E-5	="NA"	176	Infinity			-0.6384	Tissue__TCGA-LUSC
60786	Tissue	1	338	2.635E-7	="NA"	176	Infinity			-0.5962	Tissue__TCGA-LUAD
51482	Tissue	1	591	2.592E-4	="NA"	176	Infinity			0.8625	Tissue__GTEx_normal
46799	Tissue	1	241	5.334E-5	="NA"	177	Infinity			0.5964	Tissue__TCGA-LUAD
53736	Tissue	1	546	8.554E-4	="NA"	177	Infinity			0.5973	Tissue__TCGA-LUAD
58064	Tissue	1	425	1.579E-8	="NA"	177	Infinity			0.6365	Tissue__TCGA-LUSC
40177	Tissue	1	286	5.941E-5	="NA"	177	Infinity			0.63	Tissue__TCGA-NORMAL
40170	Tissue	1	394	5.094E-12	="NA"	177	Infinity			0.6359	Tissue__TCGA-LUSC
45950	Tissue	1	642	9.85E-4	="NA"	177	Infinity			0.8625	Tissue__GTEx_normal
55818	Tissue	1	587	9.85E-4	="NA"	177	Infinity			0.8625	Tissue__GTEx_normal
40159	Tissue	1	211	3.211E-5	="NA"	177	Infinity			0.6381	Tissue__TCGA-LUSC
66052	Tissue	1	345	3.529E-4	="NA"	177	Infinity			0.6307	Tissue__TCGA-NORMAL
40145	Tissue	1	624	2.29E-4	="NA"	177	Infinity			0.5965	Tissue__TCGA-LUAD
40115	Tissue	1	485	1.833E-6	="NA"	178	Infinity			0.5957	Tissue__TCGA-LUAD
40083	Tissue	1	542	1.071E-5	="NA"	178	Infinity			0.5958	Tissue__TCGA-LUAD
50093	Tissue	1	343	3.529E-4	="NA"	178	Infinity			0.63	Tissue__TCGA-NORMAL
41902	Tissue	1	302	3.529E-4	="NA"	178	Infinity			0.63	Tissue__TCGA-NORMAL
41565	Tissue	1	391	2.635E-7	="NA"	178	Infinity			-0.5956	Tissue__TCGA-LUAD
61946	Tissue	1	338	3.529E-4	="NA"	178	Infinity			-0.63	Tissue__TCGA-NORMAL
49215	Tissue	1	631	9.85E-4	="NA"	178	Infinity			0.8624	Tissue__GTEx_normal
39997	Tissue	1	692	5.608E-4	="NA"	178	Infinity			-0.6388	Tissue__TCGA-LUSC
64497	Tissue	1	614	9.85E-4	="NA"	178	Infinity			0.8624	Tissue__GTEx_normal
48680	Tissue	2	121	5.608E-4	="NA"	179	Infinity			0.6383	Tissue__TCGA-LUSC
59191	Tissue	1	316	1.833E-6	="NA"	179	Infinity			-0.5952	Tissue__TCGA-LUAD
59997	Tissue	1	289	3.529E-4	="NA"	179	Infinity			-0.6299	Tissue__TCGA-NORMAL
61875	Tissue	1	247	8.631E-6	="NA"	179	Infinity			0.6292	Tissue__TCGA-NORMAL
64613	Tissue	1	388	1.006E-10	="NA"	179	Infinity			0.6354	Tissue__TCGA-LUSC
63510	Tissue	1	587	8.554E-4	="NA"	179	Infinity			0.5961	Tissue__TCGA-LUAD
39967	Tissue	1	404	1.436E-9	="NA"	179	Infinity			0.6358	Tissue__TCGA-LUSC
64496	Tissue	1	588	9.85E-4	="NA"	179	Infinity			0.8623	Tissue__GTEx_normal
63709	Tissue	1	624	9.85E-4	="NA"	180	Infinity			0.8622	Tissue__GTEx_normal
48496	Tissue	2	624	1.439E-4	="NA"	180	Infinity			0.6367	Tissue__TCGA-LUSC
55648	Tissue	2	80	1.393E-7	="NA"	180	Infinity			0.6361	Tissue__TCGA-LUSC
56543	Tissue	1	297	3.529E-4	="NA"	180	Infinity			0.6296	Tissue__TCGA-NORMAL
62859	Tissue	1	393	2.635E-7	="NA"	180	Infinity			0.5941	Tissue__TCGA-LUAD
62858	Tissue	1	586	1.071E-5	="NA"	180	Infinity			0.5949	Tissue__TCGA-LUAD
44693	Tissue	1	422	1.833E-6	="NA"	180	Infinity			-0.5948	Tissue__TCGA-LUAD
40157	Tissue	1	262	3.529E-4	="NA"	181	Infinity			0.6289	Tissue__TCGA-NORMAL
53278	Tissue	1	545	6.175E-6	="NA"	181	Infinity			0.6361	Tissue__TCGA-LUSC
64612	Tissue	2	552	1.071E-5	="NA"	181	Infinity			0.5948	Tissue__TCGA-LUAD
51481	Tissue	1	608	9.85E-4	="NA"	181	Infinity			0.8621	Tissue__GTEx_normal
44771	Tissue	1	635	5.608E-4	="NA"	182	Infinity			0.6366	Tissue__TCGA-LUSC
55643	Tissue	1	342	3.529E-4	="NA"	182	Infinity			0.6286	Tissue__TCGA-NORMAL
39912	Tissue	1	389	1.833E-6	="NA"	182	Infinity			-0.5937	Tissue__TCGA-LUAD
64495	Tissue	1	603	9.85E-4	="NA"	182	Infinity			0.862	Tissue__GTEx_normal
41901	Tissue	1	326	3.529E-4	="NA"	183	Infinity			0.6281	Tissue__TCGA-NORMAL
64945	Tissue	1	598	2.592E-4	="NA"	183	Infinity			0.8617	Tissue__GTEx_normal
54652	Tissue	1	643	1.439E-4	="NA"	183	Infinity			0.6362	Tissue__TCGA-LUSC
53156	Tissue	1	533	6.028E-5	="NA"	183	Infinity			0.8616	Tissue__GTEx_normal
45428	Tissue	1	603	9.85E-4	="NA"	183	Infinity			0.8618	Tissue__GTEx_normal
52329	Tissue	1	98	5.334E-5	="NA"	183	Infinity			0.5941	Tissue__TCGA-LUAD
50761	Tissue	1	314	3.529E-4	="NA"	184	Infinity			0.6279	Tissue__TCGA-NORMAL
39789	Tissue	1	699	5.608E-4	="NA"	184	Infinity			0.6364	Tissue__TCGA-LUSC
64944	Tissue	1	615	9.85E-4	="NA"	184	Infinity			0.8617	Tissue__GTEx_normal
52928	Tissue	1	540	6.028E-5	="NA"	184	Infinity			0.8615	Tissue__GTEx_normal
39788	Tissue	1	75	1.071E-5	="NA"	184	Infinity			0.5934	Tissue__TCGA-LUAD
60223	Tissue	1	617	9.85E-4	="NA"	184	Infinity			0.8617	Tissue__GTEx_normal
52814	Tissue	1	581	6.175E-6	="NA"	185	Infinity			0.6353	Tissue__TCGA-LUSC
41900	Tissue	1	305	3.529E-4	="NA"	185	Infinity			0.6276	Tissue__TCGA-NORMAL
39785	Tissue	1	93	1.439E-4	="NA"	185	Infinity			0.6359	Tissue__TCGA-LUSC
66051	Tissue	1	380	1.236E-5	="NA"	185	Infinity			0.861	Tissue__GTEx_normal
47451	Tissue	1	547	1.071E-5	="NA"	185	Infinity			-0.5927	Tissue__TCGA-LUAD
39784	Tissue	1	280	5.941E-5	="NA"	186	Infinity			0.6263	Tissue__TCGA-NORMAL
58063	Tissue	1	440	1.436E-9	="NA"	186	Infinity			0.6341	Tissue__TCGA-LUSC
50835	Tissue	1	469	1.579E-8	="NA"	186	Infinity			0.6345	Tissue__TCGA-LUSC
39779	Tissue	1	305	3.529E-4	="NA"	186	Infinity			0.6271	Tissue__TCGA-NORMAL
52357	Tissue	2	619	1.439E-4	="NA"	186	Infinity			0.6358	Tissue__TCGA-LUSC
66050	Tissue	1	304	2.228E-6	="NA"	186	Infinity			0.8606	Tissue__GTEx_normal
50239	Tissue	2	723	5.608E-4	="NA"	186	Infinity			0.6361	Tissue__TCGA-LUSC
39745	Tissue	1	243	1.071E-5	="NA"	186	Infinity			0.5925	Tissue__TCGA-LUAD
39744	Tissue	1	118	1.393E-7	="NA"	186	Infinity			0.6348	Tissue__TCGA-LUSC
39743	Tissue	1	393	1.012E-6	="NA"	186	Infinity			0.6349	Tissue__TCGA-LUSC
53665	Tissue	1	636	9.85E-4	="NA"	187	Infinity			0.8613	Tissue__GTEx_normal
58419	Tissue	1	570	2.592E-4	="NA"	187	Infinity			0.861	Tissue__GTEx_normal
52121	Tissue	1	66	5.334E-5	="NA"	187	Infinity			-0.5925	Tissue__TCGA-LUAD
63455	Tissue	1	281	3.529E-4	="NA"	187	Infinity			0.6261	Tissue__TCGA-NORMAL
41860	Tissue	1	621	3.211E-5	="NA"	187	Infinity			0.6351	Tissue__TCGA-LUSC
39727	Tissue	1	358	3.529E-4	="NA"	187	Infinity			-0.6261	Tissue__TCGA-NORMAL
39720	Tissue	1	60	1.439E-4	="NA"	188	Infinity			0.6351	Tissue__TCGA-LUSC
44276	Tissue	1	513	8.554E-4	="NA"	188	Infinity			0.5927	Tissue__TCGA-LUAD
39718	Tissue	1	356	3.529E-4	="NA"	188	Infinity			0.626	Tissue__TCGA-NORMAL
39707	Tissue	1	518	1.833E-6	="NA"	188	Infinity			-0.5915	Tissue__TCGA-LUAD
46233	Tissue	1	62	5.334E-5	="NA"	188	Infinity			0.5921	Tissue__TCGA-LUAD
53155	Tissue	1	575	2.592E-4	="NA"	188	Infinity			0.8609	Tissue__GTEx_normal
39486	Tissue	1	320	3.529E-4	="NA"	189	Infinity			-0.6252	Tissue__TCGA-NORMAL
39478	Tissue	1	605	3.211E-5	="NA"	189	Infinity			0.6343	Tissue__TCGA-LUSC
63738	Tissue	1	539	1.071E-5	="NA"	189	Infinity			0.5915	Tissue__TCGA-LUAD
51674	Tissue	1	395	5.334E-5	="NA"	189	Infinity			-0.5918	Tissue__TCGA-LUAD
52328	Tissue	1	297	1.833E-6	="NA"	189	Infinity			0.5913	Tissue__TCGA-LUAD
39472	Tissue	1	34	5.901E-10	="NA"	189	Infinity			-0.8594	Tissue__GTEx_normal
39469	Tissue	1	296	9.85E-4	="NA"	190	Infinity			0.8602	Tissue__GTEx_normal
42946	Tissue	1	502	1.071E-5	="NA"	190	Infinity			0.5908	Tissue__TCGA-LUAD
39466	Tissue	1	306	3.529E-4	="NA"	190	Infinity			0.6249	Tissue__TCGA-NORMAL
39451	Tissue	1	545	3.211E-5	="NA"	190	Infinity			0.6334	Tissue__TCGA-LUSC
39431	Tissue	1	493	2.228E-6	="NA"	191	Infinity			0.8596	Tissue__GTEx_normal
39430	Tissue	1	76	1.579E-8	="NA"	191	Infinity			-0.6308	Tissue__TCGA-LUSC
57079	Tissue	1	604	9.85E-4	="NA"	191	Infinity			0.8601	Tissue__GTEx_normal
40963	Tissue	1	351	1.833E-6	="NA"	191	Infinity			-0.5904	Tissue__TCGA-LUAD
39429	Tissue	1	334	3.529E-4	="NA"	191	Infinity			-0.6245	Tissue__TCGA-NORMAL
39427	Tissue	1	121	1.462E-21	="NA"	192	Infinity			0.8568	Tissue__GTEx_normal
39424	Tissue	1	494	2.29E-4	="NA"	192	Infinity			0.5905	Tissue__TCGA-LUAD
66049	Tissue	1	330	3.529E-4	="NA"	192	Infinity			-0.6243	Tissue__TCGA-NORMAL
39419	Tissue	1	615	5.608E-4	="NA"	192	Infinity			0.6334	Tissue__TCGA-LUSC
52835	Tissue	2	602	6.175E-6	="NA"	192	Infinity			0.632	Tissue__TCGA-LUSC
47450	Tissue	1	597	9.85E-4	="NA"	192	Infinity			0.86	Tissue__GTEx_normal
47924	Tissue	1	346	3.529E-4	="NA"	193	Infinity			-0.6238	Tissue__TCGA-NORMAL
64943	Tissue	1	592	2.592E-4	="NA"	193	Infinity			0.8597	Tissue__GTEx_normal
42007	Tissue	1	364	5.334E-5	="NA"	193	Infinity			0.5898	Tissue__TCGA-LUAD
39418	Tissue	1	680	5.608E-4	="NA"	193	Infinity			0.6325	Tissue__TCGA-LUSC
45427	Tissue	1	608	9.85E-4	="NA"	193	Infinity			0.8599	Tissue__GTEx_normal
44697	Tissue	1	494	5.334E-5	="NA"	194	Infinity			-0.5897	Tissue__TCGA-LUAD
46793	Tissue	1	251	1.087E-6	="NA"	194	Infinity			0.6224	Tissue__TCGA-NORMAL
54132	Tissue	1	631	9.85E-4	="NA"	194	Infinity			0.8597	Tissue__GTEx_normal
39406	Tissue	1	314	5.941E-5	="NA"	194	Infinity			-0.6232	Tissue__TCGA-NORMAL
48754	Tissue	1	696	5.608E-4	="NA"	194	Infinity			0.6324	Tissue__TCGA-LUSC
39381	Tissue	1	350	3.529E-4	="NA"	194	Infinity			0.6233	Tissue__TCGA-NORMAL
39374	Tissue	1	83	1.439E-4	="NA"	195	Infinity			-0.632	Tissue__TCGA-LUSC
60588	Tissue	1	601	9.85E-4	="NA"	195	Infinity			0.8595	Tissue__GTEx_normal
39373	Tissue	1	663	5.608E-4	="NA"	195	Infinity			0.6323	Tissue__TCGA-LUSC
39370	Tissue	2	314	9.85E-4	="NA"	195	Infinity			0.8595	Tissue__GTEx_normal
45642	Tissue	1	353	3.529E-4	="NA"	195	Infinity			-0.6231	Tissue__TCGA-NORMAL
57628	Tissue	1	581	5.334E-5	="NA"	195	Infinity			0.5888	Tissue__TCGA-LUAD
45674	Tissue	1	663	5.608E-4	="NA"	196	Infinity			0.6321	Tissue__TCGA-LUSC
39367	Tissue	1	343	3.529E-4	="NA"	196	Infinity			0.6223	Tissue__TCGA-NORMAL
55817	Tissue	1	575	2.592E-4	="NA"	196	Infinity			0.8591	Tissue__GTEx_normal
60785	Tissue	1	397	8.554E-4	="NA"	196	Infinity			0.5893	Tissue__TCGA-LUAD
55585	Tissue	1	582	2.592E-4	="NA"	197	Infinity			0.8589	Tissue__GTEx_normal
39361	Tissue	1	644	5.608E-4	="NA"	197	Infinity			0.632	Tissue__TCGA-LUSC
42089	Tissue	1	576	2.592E-4	="NA"	197	Infinity			0.8589	Tissue__GTEx_normal
40850	Tissue	1	43	5.608E-4	="NA"	197	Infinity			-0.632	Tissue__TCGA-LUSC
47751	Tissue	1	359	3.529E-4	="NA"	197	Infinity			-0.6221	Tissue__TCGA-NORMAL
57627	Tissue	1	126	1.833E-6	="NA"	197	Infinity			0.5879	Tissue__TCGA-LUAD
40565	Tissue	1	606	8.554E-4	="NA"	198	Infinity			0.5887	Tissue__TCGA-LUAD
39350	Tissue	1	63	1.439E-4	="NA"	198	Infinity			0.6307	Tissue__TCGA-LUSC
52785	Tissue	1	349	3.529E-4	="NA"	198	Infinity			0.622	Tissue__TCGA-NORMAL
63708	Tissue	1	528	5.334E-5	="NA"	198	Infinity			-0.588	Tissue__TCGA-LUAD
52327	Tissue	1	662	5.608E-4	="NA"	198	Infinity			0.6316	Tissue__TCGA-LUSC
51480	Tissue	1	584	2.592E-4	="NA"	198	Infinity			0.8588	Tissue__GTEx_normal
41865	Tissue	1	303	3.529E-4	="NA"	199	Infinity			0.6209	Tissue__TCGA-NORMAL
46186	Tissue	1	107	1.579E-8	="NA"	199	Infinity			-0.6277	Tissue__TCGA-LUSC
39315	Tissue	1	41	1.436E-9	="NA"	199	Infinity			-0.6268	Tissue__TCGA-LUSC
61735	Tissue	1	637	9.85E-4	="NA"	199	Infinity			0.8583	Tissue__GTEx_normal
39314	Tissue	1	595	8.554E-4	="NA"	199	Infinity			0.5883	Tissue__TCGA-LUAD
52326	Tissue	1	562	1.833E-6	="NA"	199	Infinity			0.5873	Tissue__TCGA-LUAD
47923	Tissue	1	333	3.529E-4	="NA"	200	Infinity			-0.6207	Tissue__TCGA-NORMAL
55584	Tissue	1	607	9.85E-4	="NA"	200	Infinity			0.8581	Tissue__GTEx_normal
39309	Tissue	1	644	1.439E-4	="NA"	200	Infinity			0.6299	Tissue__TCGA-LUSC
39287	Tissue	1	520	1.833E-6	="NA"	200	Infinity			0.5872	Tissue__TCGA-LUAD
41914	Tissue	1	395	2.635E-7	="NA"	200	Infinity			0.5868	Tissue__TCGA-LUAD
57626	Tissue	2	90	6.175E-6	="NA"	200	Infinity			0.6283	Tissue__TCGA-LUSC
40564	Tissue	1	163	4.84E-8	="NA"	201	Infinity			-0.8569	Tissue__GTEx_normal
56685	Tissue	1	693	5.608E-4	="NA"	201	Infinity			0.6302	Tissue__TCGA-LUSC
63707	Tissue	1	624	9.85E-4	="NA"	201	Infinity			0.8579	Tissue__GTEx_normal
63706	Tissue	1	552	2.592E-4	="NA"	201	Infinity			0.8578	Tissue__GTEx_normal
43131	Tissue	1	630	9.85E-4	="NA"	201	Infinity			0.8579	Tissue__GTEx_normal
49095	Tissue	1	702	1.439E-4	="NA"	201	Infinity			0.6294	Tissue__TCGA-LUSC
49960	Tissue	1	539	1.833E-6	="NA"	201	Infinity			0.5868	Tissue__TCGA-LUAD
39262	Tissue	1	525	1.071E-5	="NA"	201	Infinity			0.5872	Tissue__TCGA-LUAD
39184	Tissue	1	305	3.529E-4	="NA"	201	Infinity			-0.6206	Tissue__TCGA-NORMAL
38418	Tissue	1	592	3.211E-5	="NA"	202	Infinity			0.6271	Tissue__TCGA-LUSC
38380	Tissue	1	712	5.608E-4	="NA"	202	Infinity			0.6293	Tissue__TCGA-LUSC
39465	Tissue	1	261	3.529E-4	="NA"	202	Infinity			0.6203	Tissue__TCGA-NORMAL
62857	Tissue	1	599	8.554E-4	="NA"	202	Infinity			0.5874	Tissue__TCGA-LUAD
53154	Tissue	1	566	2.592E-4	="NA"	202	Infinity			0.8577	Tissue__GTEx_normal
52069	Tissue	1	447	1.071E-5	="NA"	203	Infinity			-0.5861	Tissue__TCGA-LUAD
44214	Tissue	1	528	6.175E-6	="NA"	203	Infinity			0.6266	Tissue__TCGA-LUSC
60222	Tissue	1	625	9.85E-4	="NA"	203	Infinity			0.8577	Tissue__GTEx_normal
61845	Tissue	1	602	9.85E-4	="NA"	203	Infinity			0.8577	Tissue__GTEx_normal
53153	Tissue	1	558	2.592E-4	="NA"	203	Infinity			0.8573	Tissue__GTEx_normal
38371	Tissue	1	320	3.529E-4	="NA"	203	Infinity			0.6202	Tissue__TCGA-NORMAL
63737	Tissue	1	558	1.071E-5	="NA"	204	Infinity			0.5857	Tissue__TCGA-LUAD
64620	Tissue	1	524	5.608E-4	="NA"	204	Infinity			0.6279	Tissue__TCGA-LUSC
52546	Tissue	3	83	1.012E-6	="NA"	204	Infinity			0.6263	Tissue__TCGA-LUSC
54131	Tissue	1	608	9.85E-4	="NA"	204	Infinity			0.8573	Tissue__GTEx_normal
40605	Tissue	1	348	3.529E-4	="NA"	204	Infinity			0.6198	Tissue__TCGA-NORMAL
61597	Tissue	1	566	6.175E-6	="NA"	204	Infinity			0.6265	Tissue__TCGA-LUSC
38354	Tissue	1	345	3.529E-4	="NA"	205	Infinity			0.6197	Tissue__TCGA-NORMAL
60587	Tissue	1	562	2.592E-4	="NA"	205	Infinity			0.857	Tissue__GTEx_normal
57078	Tissue	1	609	9.85E-4	="NA"	205	Infinity			0.8572	Tissue__GTEx_normal
38341	Tissue	1	79	2.171E-10	="NA"	205	Infinity			-0.5824	Tissue__TCGA-LUAD
38339	Tissue	1	152	1.436E-9	="NA"	205	Infinity			-0.6246	Tissue__TCGA-LUSC
53727	Tissue	1	359	2.29E-4	="NA"	205	Infinity			0.5861	Tissue__TCGA-LUAD
64683	Tissue	1	446	1.071E-5	="NA"	205	Infinity			0.5844	Tissue__TCGA-LUAD
38337	Tissue	1	184	1.439E-4	="NA"	206	Infinity			-0.6262	Tissue__TCGA-LUSC
55583	Tissue	1	595	2.592E-4	="NA"	206	Infinity			0.8569	Tissue__GTEx_normal
42730	Tissue	1	563	2.592E-4	="NA"	206	Infinity			0.8569	Tissue__GTEx_normal
38335	Tissue	1	337	3.529E-4	="NA"	206	Infinity			0.6196	Tissue__TCGA-NORMAL
38322	Tissue	1	77	1.071E-5	="NA"	206	Infinity			-0.584	Tissue__TCGA-LUAD
60784	Tissue	1	545	6.028E-5	="NA"	206	Infinity			0.8568	Tissue__GTEx_normal
38319	Tissue	1	561	6.028E-5	="NA"	207	Infinity			0.8567	Tissue__GTEx_normal
38318	Tissue	1	256	3.529E-4	="NA"	207	Infinity			0.6192	Tissue__TCGA-NORMAL
59631	Tissue	1	344	3.529E-4	="NA"	207	Infinity			0.6192	Tissue__TCGA-NORMAL
38310	Tissue	1	224	6.175E-6	="NA"	207	Infinity			0.625	Tissue__TCGA-LUSC
52325	Tissue	2	532	1.071E-5	="NA"	207	Infinity			0.5832	Tissue__TCGA-LUAD
53667	Tissue	1	59	1.579E-8	="NA"	208	Infinity			0.6241	Tissue__TCGA-LUSC
58062	Tissue	1	373	1.006E-10	="NA"	208	Infinity			0.6237	Tissue__TCGA-LUSC
38299	Tissue	1	339	3.529E-4	="NA"	208	Infinity			0.6189	Tissue__TCGA-NORMAL
42729	Tissue	1	585	2.592E-4	="NA"	208	Infinity			0.8567	Tissue__GTEx_normal
63824	Tissue	1	443	1.833E-6	="NA"	208	Infinity			0.5827	Tissue__TCGA-LUAD
65319	Tissue	1	556	2.592E-4	="NA"	208	Infinity			0.8567	Tissue__GTEx_normal
64494	Tissue	1	628	9.85E-4	="NA"	208	Infinity			0.8568	Tissue__GTEx_normal
38295	Tissue	1	602	8.554E-4	="NA"	208	Infinity			0.5841	Tissue__TCGA-LUAD
44958	Tissue	1	685	5.608E-4	="NA"	209	Infinity			0.6261	Tissue__TCGA-LUSC
61734	Tissue	1	623	9.85E-4	="NA"	209	Infinity			0.8566	Tissue__GTEx_normal
48446	Tissue	1	269	3.529E-4	="NA"	209	Infinity			-0.6187	Tissue__TCGA-NORMAL
64611	Tissue	1	481	6.175E-6	="NA"	209	Infinity			0.6247	Tissue__TCGA-LUSC
56542	Tissue	1	316	3.529E-4	="NA"	209	Infinity			0.6187	Tissue__TCGA-NORMAL
60783	Tissue	1	545	2.592E-4	="NA"	209	Infinity			0.8563	Tissue__GTEx_normal
53152	Tissue	1	303	2.635E-7	="NA"	209	Infinity			-0.5815	Tissue__TCGA-LUAD
59193	Tissue	1	361	9.85E-4	="NA"	210	Infinity			0.8563	Tissue__GTEx_normal
45747	Tissue	1	526	2.635E-7	="NA"	210	Infinity			0.5813	Tissue__TCGA-LUAD
61733	Tissue	1	634	9.85E-4	="NA"	210	Infinity			0.8563	Tissue__GTEx_normal
41905	Tissue	1	318	3.529E-4	="NA"	210	Infinity			0.6185	Tissue__TCGA-NORMAL
38255	Tissue	1	354	3.529E-4	="NA"	210	Infinity			0.6185	Tissue__TCGA-NORMAL
38252	Tissue	1	220	2.29E-4	="NA"	210	Infinity			-0.5829	Tissue__TCGA-LUAD
38251	Tissue	1	115	5.608E-4	="NA"	210	Infinity			-0.6253	Tissue__TCGA-LUSC
44770	Tissue	1	630	5.608E-4	="NA"	211	Infinity			0.6251	Tissue__TCGA-LUSC
49415	Tissue	1	323	3.529E-4	="NA"	211	Infinity			-0.6184	Tissue__TCGA-NORMAL
58418	Tissue	1	623	9.85E-4	="NA"	211	Infinity			0.8561	Tissue__GTEx_normal
38249	Tissue	2	226	2.635E-7	="NA"	211	Infinity			0.5799	Tissue__TCGA-LUAD
51668	Tissue	1	578	2.592E-4	="NA"	211	Infinity			0.8558	Tissue__GTEx_normal
45652	Tissue	1	37	1.436E-9	="NA"	212	Infinity			0.6232	Tissue__TCGA-LUSC
58417	Tissue	1	568	2.592E-4	="NA"	212	Infinity			0.8557	Tissue__GTEx_normal
38268	Tissue	1	313	3.529E-4	="NA"	212	Infinity			0.6182	Tissue__TCGA-NORMAL
52999	Tissue	1	367	2.635E-7	="NA"	212	Infinity			-0.5794	Tissue__TCGA-LUAD
52998	Tissue	1	269	2.965E-9	="NA"	212	Infinity			0.5768	Tissue__TCGA-LUAD
38234	Tissue	1	325	3.529E-4	="NA"	212	Infinity			-0.6182	Tissue__TCGA-NORMAL
40943	Tissue	1	189	1.439E-4	="NA"	212	Infinity			0.6247	Tissue__TCGA-LUSC
38228	Tissue	1	322	3.529E-4	="NA"	212	Infinity			0.6182	Tissue__TCGA-NORMAL
66103	Tissue	1	412	1.833E-6	="NA"	213	Infinity			0.5781	Tissue__TCGA-LUAD
62179	Tissue	1	614	9.85E-4	="NA"	213	Infinity			0.8556	Tissue__GTEx_normal
38165	Tissue	1	64	1.236E-5	="NA"	213	Infinity			-0.8552	Tissue__GTEx_normal
63705	Tissue	1	628	9.85E-4	="NA"	213	Infinity			0.8556	Tissue__GTEx_normal
45949	Tissue	1	578	2.592E-4	="NA"	213	Infinity			0.8554	Tissue__GTEx_normal
66248	Tissue	1	338	3.529E-4	="NA"	213	Infinity			0.618	Tissue__TCGA-NORMAL
49094	Tissue	1	732	5.608E-4	="NA"	213	Infinity			0.6249	Tissue__TCGA-LUSC
64493	Tissue	1	599	9.85E-4	="NA"	213	Infinity			0.8556	Tissue__GTEx_normal
56391	Tissue	1	628	9.85E-4	="NA"	214	Infinity			0.8554	Tissue__GTEx_normal
63704	Tissue	1	597	9.85E-4	="NA"	214	Infinity			0.8554	Tissue__GTEx_normal
49932	Tissue	2	548	8.554E-4	="NA"	214	Infinity			0.5806	Tissue__TCGA-LUAD
38160	Tissue	1	388	1.436E-9	="NA"	214	Infinity			0.6228	Tissue__TCGA-LUSC
54885	Tissue	1	71	1.393E-7	="NA"	214	Infinity			-0.6233	Tissue__TCGA-LUSC
40907	Tissue	1	334	3.529E-4	="NA"	214	Infinity			0.6178	Tissue__TCGA-NORMAL
50760	Tissue	1	339	3.529E-4	="NA"	215	Infinity			-0.6173	Tissue__TCGA-NORMAL
56390	Tissue	1	612	9.85E-4	="NA"	215	Infinity			0.8553	Tissue__GTEx_normal
38155	Tissue	1	61	5.334E-5	="NA"	215	Infinity			-0.5775	Tissue__TCGA-LUAD
63823	Tissue	1	288	3.122E-8	="NA"	215	Infinity			0.5757	Tissue__TCGA-LUAD
38153	Tissue	1	623	1.439E-4	="NA"	215	Infinity			0.6239	Tissue__TCGA-LUSC
48091	Tissue	1	354	3.529E-4	="NA"	215	Infinity			0.6173	Tissue__TCGA-NORMAL
38132	Tissue	1	727	5.608E-4	="NA"	216	Infinity			0.6238	Tissue__TCGA-LUSC
46662	Tissue	1	320	1.071E-5	="NA"	216	Infinity			-0.5765	Tissue__TCGA-LUAD
42728	Tissue	1	598	2.592E-4	="NA"	216	Infinity			0.8551	Tissue__GTEx_normal
38131	Tissue	1	358	3.529E-4	="NA"	216	Infinity			-0.6172	Tissue__TCGA-NORMAL
53151	Tissue	1	540	6.028E-5	="NA"	216	Infinity			0.855	Tissue__GTEx_normal
49099	Tissue	1	393	1.393E-7	="NA"	217	Infinity			0.6226	Tissue__TCGA-LUSC
52396	Tissue	1	156	1.012E-6	="NA"	217	Infinity			-0.6227	Tissue__TCGA-LUSC
39741	Tissue	1	618	3.211E-5	="NA"	217	Infinity			0.6229	Tissue__TCGA-LUSC
59664	Tissue	1	420	3.517E-7	="NA"	217	Infinity			0.8543	Tissue__GTEx_normal
61198	Tissue	1	276	3.529E-4	="NA"	217	Infinity			0.6169	Tissue__TCGA-NORMAL
53539	Tissue	1	620	9.85E-4	="NA"	217	Infinity			0.8551	Tissue__GTEx_normal
66048	Tissue	1	420	6.028E-5	="NA"	217	Infinity			0.8549	Tissue__GTEx_normal
38120	Tissue	1	537	6.175E-6	="NA"	217	Infinity			0.6228	Tissue__TCGA-LUSC
38117	Tissue	1	66	8.554E-4	="NA"	217	Infinity			0.5775	Tissue__TCGA-LUAD
41043	Tissue	1	181	1.236E-5	="NA"	218	Infinity			0.8546	Tissue__GTEx_normal
38116	Tissue	1	277	5.941E-5	="NA"	218	Infinity			0.6167	Tissue__TCGA-NORMAL
66336	Tissue	1	695	5.608E-4	="NA"	218	Infinity			0.6235	Tissue__TCGA-LUSC
52356	Tissue	2	48	2.29E-4	="NA"	218	Infinity			0.5759	Tissue__TCGA-LUAD
39183	Tissue	1	321	3.529E-4	="NA"	218	Infinity			-0.6168	Tissue__TCGA-NORMAL
57648	Tissue	1	623	2.29E-4	="NA"	219	Infinity			0.5753	Tissue__TCGA-LUAD
38112	Tissue	1	335	3.529E-4	="NA"	219	Infinity			0.6163	Tissue__TCGA-NORMAL
44822	Tissue	2	421	5.334E-5	="NA"	219	Infinity			0.5741	Tissue__TCGA-LUAD
38107	Tissue	1	345	3.529E-4	="NA"	219	Infinity			0.6163	Tissue__TCGA-NORMAL
53150	Tissue	1	553	2.592E-4	="NA"	219	Infinity			0.8547	Tissue__GTEx_normal
48753	Tissue	2	716	5.608E-4	="NA"	219	Infinity			0.6232	Tissue__TCGA-LUSC
61596	Tissue	1	618	1.071E-5	="NA"	219	Infinity			0.5739	Tissue__TCGA-LUAD
38091	Tissue	2	209	1.833E-6	="NA"	220	Infinity			0.5727	Tissue__TCGA-LUAD
38072	Tissue	1	50	6.175E-6	="NA"	220	Infinity			-0.6224	Tissue__TCGA-LUSC
38071	Tissue	1	216	3.529E-4	="NA"	220	Infinity			0.6162	Tissue__TCGA-NORMAL
65318	Tissue	1	579	2.592E-4	="NA"	220	Infinity			0.8543	Tissue__GTEx_normal
51667	Tissue	1	550	6.028E-5	="NA"	220	Infinity			0.8542	Tissue__GTEx_normal
51479	Tissue	1	622	9.85E-4	="NA"	220	Infinity			0.8546	Tissue__GTEx_normal
38062	Tissue	1	36	1.012E-6	="NA"	221	Infinity			-0.6219	Tissue__TCGA-LUSC
38061	Tissue	1	330	3.529E-4	="NA"	221	Infinity			-0.6161	Tissue__TCGA-NORMAL
55816	Tissue	1	573	2.592E-4	="NA"	221	Infinity			0.854	Tissue__GTEx_normal
61732	Tissue	1	615	9.85E-4	="NA"	221	Infinity			0.8542	Tissue__GTEx_normal
54130	Tissue	1	448	1.071E-5	="NA"	221	Infinity			-0.5727	Tissue__TCGA-LUAD
53735	Tissue	1	624	8.554E-4	="NA"	222	Infinity			0.5735	Tissue__TCGA-LUAD
55831	Tissue	1	62	1.071E-5	="NA"	222	Infinity			0.5726	Tissue__TCGA-LUAD
61028	Tissue	1	297	3.529E-4	="NA"	222	Infinity			0.6156	Tissue__TCGA-NORMAL
61027	Tissue	1	344	3.529E-4	="NA"	222	Infinity			-0.6156	Tissue__TCGA-NORMAL
58036	Tissue	1	536	6.028E-5	="NA"	222	Infinity			0.8538	Tissue__GTEx_normal
38053	Tissue	1	46	2.612E-15	="NA"	222	Infinity			0.6196	Tissue__TCGA-LUSC
38051	Tissue	1	77	1.833E-6	="NA"	222	Infinity			0.5722	Tissue__TCGA-LUAD
64492	Tissue	1	590	9.85E-4	="NA"	222	Infinity			0.854	Tissue__GTEx_normal
51478	Tissue	1	611	9.85E-4	="NA"	222	Infinity			0.854	Tissue__GTEx_normal
37866	Tissue	1	281	9.85E-4	="NA"	223	Infinity			0.8539	Tissue__GTEx_normal
39915	Tissue	1	450	1.833E-6	="NA"	223	Infinity			0.572	Tissue__TCGA-LUAD
62380	Tissue	2	576	8.554E-4	="NA"	223	Infinity			0.573	Tissue__TCGA-LUAD
37865	Tissue	1	110	5.608E-4	="NA"	223	Infinity			-0.6225	Tissue__TCGA-LUSC
52056	Tissue	3	114	5.608E-4	="NA"	223	Infinity			0.6225	Tissue__TCGA-LUSC
55642	Tissue	1	343	3.529E-4	="NA"	223	Infinity			0.6155	Tissue__TCGA-NORMAL
54129	Tissue	1	609	9.85E-4	="NA"	223	Infinity			0.8539	Tissue__GTEx_normal
54723	Tissue	1	613	3.211E-5	="NA"	223	Infinity			0.6217	Tissue__TCGA-LUSC
37860	Tissue	1	691	5.608E-4	="NA"	224	Infinity			0.6224	Tissue__TCGA-LUSC
44835	Tissue	1	397	1.012E-6	="NA"	224	Infinity			0.6214	Tissue__TCGA-LUSC
41913	Tissue	1	493	1.012E-6	="NA"	224	Infinity			0.6214	Tissue__TCGA-LUSC
56541	Tissue	1	331	3.529E-4	="NA"	224	Infinity			0.6152	Tissue__TCGA-NORMAL
62856	Tissue	2	556	2.29E-4	="NA"	224	Infinity			0.5726	Tissue__TCGA-LUAD
45426	Tissue	1	607	9.85E-4	="NA"	224	Infinity			0.8538	Tissue__GTEx_normal
51477	Tissue	1	552	2.592E-4	="NA"	224	Infinity			0.8537	Tissue__GTEx_normal
49959	Tissue	2	516	2.635E-7	="NA"	225	Infinity			0.5706	Tissue__TCGA-LUAD
37857	Tissue	1	331	3.529E-4	="NA"	225	Infinity			-0.6151	Tissue__TCGA-NORMAL
66047	Tissue	1	378	6.028E-5	="NA"	225	Infinity			0.8535	Tissue__GTEx_normal
37854	Tissue	1	108	5.608E-4	="NA"	225	Infinity			0.6223	Tissue__TCGA-LUSC
57625	Tissue	1	134	1.071E-5	="NA"	225	Infinity			0.5714	Tissue__TCGA-LUAD
60242	Tissue	1	337	3.529E-4	="NA"	226	Infinity			0.615	Tissue__TCGA-NORMAL
37852	Tissue	1	406	3.517E-7	="NA"	226	Infinity			0.8529	Tissue__GTEx_normal
37789	Tissue	2	76	5.094E-12	="NA"	226	Infinity			0.6185	Tissue__TCGA-LUSC
37787	Tissue	1	37	3.211E-5	="NA"	226	Infinity			0.6202	Tissue__TCGA-LUSC
60221	Tissue	1	621	9.85E-4	="NA"	226	Infinity			0.8536	Tissue__GTEx_normal
60220	Tissue	1	538	6.028E-5	="NA"	226	Infinity			0.8533	Tissue__GTEx_normal
45425	Tissue	1	451	1.071E-5	="NA"	226	Infinity			-0.571	Tissue__TCGA-LUAD
37786	Tissue	2	646	5.608E-4	="NA"	227	Infinity			0.6216	Tissue__TCGA-LUSC
49076	Tissue	2	734	5.608E-4	="NA"	227	Infinity			0.6216	Tissue__TCGA-LUSC
49075	Tissue	1	606	9.85E-4	="NA"	227	Infinity			0.8535	Tissue__GTEx_normal
66046	Tissue	1	337	3.529E-4	="NA"	227	Infinity			-0.6149	Tissue__TCGA-NORMAL
52324	Tissue	1	541	1.833E-6	="NA"	227	Infinity			0.5697	Tissue__TCGA-LUAD
37764	Tissue	1	238	9.85E-4	="NA"	228	Infinity			0.8533	Tissue__GTEx_normal
52997	Tissue	1	383	2.29E-4	="NA"	228	Infinity			0.571	Tissue__TCGA-LUAD
65701	Tissue	1	331	3.529E-4	="NA"	228	Infinity			0.6147	Tissue__TCGA-NORMAL
63703	Tissue	1	704	5.608E-4	="NA"	228	Infinity			0.6215	Tissue__TCGA-LUSC
53277	Tissue	2	71	3.211E-5	="NA"	228	Infinity			0.6199	Tissue__TCGA-LUSC
37627	Tissue	1	318	3.529E-4	="NA"	228	Infinity			-0.6147	Tissue__TCGA-NORMAL
49655	Tissue	1	59	1.006E-10	="NA"	228	Infinity			-0.6183	Tissue__TCGA-LUSC
44213	Tissue	1	515	6.175E-6	="NA"	229	Infinity			0.6197	Tissue__TCGA-LUSC
48495	Tissue	1	651	1.439E-4	="NA"	229	Infinity			0.62	Tissue__TCGA-LUSC
53538	Tissue	1	564	1.071E-5	="NA"	229	Infinity			-0.5695	Tissue__TCGA-LUAD
40906	Tissue	1	336	3.529E-4	="NA"	229	Infinity			0.6138	Tissue__TCGA-NORMAL
37622	Tissue	1	101	3.211E-5	="NA"	229	Infinity			0.6198	Tissue__TCGA-LUSC
44692	Tissue	1	648	9.85E-4	="NA"	229	Infinity			0.8532	Tissue__GTEx_normal
37618	Tissue	1	614	3.211E-5	="NA"	230	Infinity			0.6191	Tissue__TCGA-LUSC
65700	Tissue	1	326	3.529E-4	="NA"	230	Infinity			0.6135	Tissue__TCGA-NORMAL
63702	Tissue	1	620	9.85E-4	="NA"	230	Infinity			0.853	Tissue__GTEx_normal
37616	Tissue	1	47	1.579E-8	="NA"	230	Infinity			0.6179	Tissue__TCGA-LUSC
65389	Tissue	1	353	3.529E-4	="NA"	230	Infinity			-0.6135	Tissue__TCGA-NORMAL
53276	Tissue	1	675	5.608E-4	="NA"	230	Infinity			0.6199	Tissue__TCGA-LUSC
60219	Tissue	1	441	1.071E-5	="NA"	230	Infinity			-0.5694	Tissue__TCGA-LUAD
37597	Tissue	1	444	2.635E-7	="NA"	230	Infinity			-0.569	Tissue__TCGA-LUAD
40799	Tissue	1	561	6.175E-6	="NA"	230	Infinity			0.6189	Tissue__TCGA-LUSC
37859	Tissue	1	555	8.554E-4	="NA"	231	Infinity			0.5696	Tissue__TCGA-LUAD
54572	Tissue	1	589	2.592E-4	="NA"	231	Infinity			0.8527	Tissue__GTEx_normal
64942	Tissue	1	574	2.592E-4	="NA"	231	Infinity			0.8527	Tissue__GTEx_normal
50834	Tissue	1	295	1.006E-10	="NA"	231	Infinity			0.6164	Tissue__TCGA-LUSC
60390	Tissue	1	315	3.529E-4	="NA"	231	Infinity			0.6132	Tissue__TCGA-NORMAL
37586	Tissue	1	295	3.529E-4	="NA"	232	Infinity			-0.6127	Tissue__TCGA-NORMAL
46661	Tissue	1	418	1.071E-5	="NA"	232	Infinity			-0.5684	Tissue__TCGA-LUAD
65699	Tissue	1	310	2.228E-6	="NA"	232	Infinity			0.852	Tissue__GTEx_normal
42678	Tissue	1	348	3.529E-4	="NA"	232	Infinity			0.6127	Tissue__TCGA-NORMAL
54651	Tissue	1	568	6.175E-6	="NA"	232	Infinity			0.6172	Tissue__TCGA-LUSC
41564	Tissue	1	376	1.833E-6	="NA"	232	Infinity			-0.5682	Tissue__TCGA-LUAD
37565	Tissue	1	568	3.211E-5	="NA"	232	Infinity			0.6175	Tissue__TCGA-LUSC
37564	Tissue	1	41	1.393E-7	="NA"	233	Infinity			-0.6155	Tissue__TCGA-LUSC
66247	Tissue	1	326	3.529E-4	="NA"	233	Infinity			0.6125	Tissue__TCGA-NORMAL
37560	Tissue	1	118	6.175E-6	="NA"	233	Infinity			-0.6157	Tissue__TCGA-LUSC
39396	Tissue	1	352	1.439E-4	="NA"	233	Infinity			0.6165	Tissue__TCGA-LUSC
60218	Tissue	1	587	2.592E-4	="NA"	233	Infinity			0.8525	Tissue__GTEx_normal
37539	Tissue	1	69	8.554E-4	="NA"	233	Infinity			0.5691	Tissue__TCGA-LUAD
54877	Tissue	1	602	9.85E-4	="NA"	233	Infinity			0.8526	Tissue__GTEx_normal
54304	Tissue	1	330	3.529E-4	="NA"	234	Infinity			0.6124	Tissue__TCGA-NORMAL
55815	Tissue	1	549	2.592E-4	="NA"	234	Infinity			0.8521	Tissue__GTEx_normal
37537	Tissue	1	66	1.439E-4	="NA"	234	Infinity			-0.6164	Tissue__TCGA-LUSC
45746	Tissue	1	462	2.635E-7	="NA"	234	Infinity			0.5675	Tissue__TCGA-LUAD
37534	Tissue	2	715	5.608E-4	="NA"	234	Infinity			0.6171	Tissue__TCGA-LUSC
61731	Tissue	1	403	1.071E-5	="NA"	234	Infinity			-0.5678	Tissue__TCGA-LUAD
37524	Tissue	1	560	3.211E-5	="NA"	234	Infinity			0.6157	Tissue__TCGA-LUSC
51476	Tissue	1	559	6.028E-5	="NA"	234	Infinity			0.852	Tissue__GTEx_normal
63249	Tissue	1	638	1.439E-4	="NA"	235	Infinity			0.6163	Tissue__TCGA-LUSC
37517	Tissue	1	322	3.529E-4	="NA"	235	Infinity			-0.6123	Tissue__TCGA-NORMAL
45686	Tissue	1	363	1.236E-5	="NA"	235	Infinity			0.8517	Tissue__GTEx_normal
60487	Tissue	1	556	6.028E-5	="NA"	235	Infinity			0.8519	Tissue__GTEx_normal
37515	Tissue	1	516	5.334E-5	="NA"	235	Infinity			-0.5678	Tissue__TCGA-LUAD
61844	Tissue	1	405	1.071E-5	="NA"	235	Infinity			-0.5676	Tissue__TCGA-LUAD
37507	Tissue	1	311	3.529E-4	="NA"	235	Infinity			-0.6123	Tissue__TCGA-NORMAL
54876	Tissue	1	574	2.592E-4	="NA"	235	Infinity			0.852	Tissue__GTEx_normal
57077	Tissue	1	608	9.85E-4	="NA"	236	Infinity			0.852	Tissue__GTEx_normal
54722	Tissue	1	632	3.211E-5	="NA"	236	Infinity			0.6149	Tissue__TCGA-LUSC
60217	Tissue	1	589	9.85E-4	="NA"	236	Infinity			0.852	Tissue__GTEx_normal
37172	Tissue	1	302	1.833E-6	="NA"	236	Infinity			0.5655	Tissue__TCGA-LUAD
37167	Tissue	1	336	3.529E-4	="NA"	236	Infinity			0.612	Tissue__TCGA-NORMAL
37146	Tissue	1	89	1.071E-5	="NA"	237	Infinity			-0.5653	Tissue__TCGA-LUAD
38237	Tissue	1	322	3.529E-4	="NA"	237	Infinity			0.611	Tissue__TCGA-NORMAL
60216	Tissue	1	601	9.85E-4	="NA"	237	Infinity			0.8517	Tissue__GTEx_normal
45641	Tissue	1	700	5.608E-4	="NA"	237	Infinity			0.6156	Tissue__TCGA-LUSC
43529	Tissue	1	514	1.071E-5	="NA"	238	Infinity			-0.5652	Tissue__TCGA-LUAD
61026	Tissue	1	301	3.529E-4	="NA"	238	Infinity			0.6109	Tissue__TCGA-NORMAL
60309	Tissue	1	587	8.554E-4	="NA"	238	Infinity			0.566	Tissue__TCGA-LUAD
46146	Tissue	1	614	9.85E-4	="NA"	238	Infinity			0.8515	Tissue__GTEx_normal
56684	Tissue	1	650	5.608E-4	="NA"	238	Infinity			0.6155	Tissue__TCGA-LUSC
37120	Tissue	1	98	3.211E-5	="NA"	238	Infinity			0.6143	Tissue__TCGA-LUSC
37114	Tissue	1	333	3.529E-4	="NA"	238	Infinity			0.6109	Tissue__TCGA-NORMAL
65462	Tissue	2	131	1.833E-6	="NA"	238	Infinity			0.5646	Tissue__TCGA-LUAD
45424	Tissue	1	265	3.122E-8	="NA"	238	Infinity			-0.5638	Tissue__TCGA-LUAD
45423	Tissue	1	578	2.592E-4	="NA"	238	Infinity			0.8514	Tissue__GTEx_normal
37110	Tissue	1	366	3.529E-4	="NA"	239	Infinity			-0.6106	Tissue__TCGA-NORMAL
51556	Tissue	1	403	1.833E-6	="NA"	239	Infinity			-0.564	Tissue__TCGA-LUAD
55814	Tissue	2	729	5.608E-4	="NA"	239	Infinity			0.6149	Tissue__TCGA-LUSC
61730	Tissue	1	602	9.85E-4	="NA"	239	Infinity			0.8514	Tissue__GTEx_normal
65317	Tissue	1	602	9.85E-4	="NA"	239	Infinity			0.8514	Tissue__GTEx_normal
37108	Tissue	1	94	1.393E-7	="NA"	239	Infinity			0.6138	Tissue__TCGA-LUSC
44691	Tissue	1	631	9.85E-4	="NA"	239	Infinity			0.8514	Tissue__GTEx_normal
49556	Tissue	1	579	2.29E-4	="NA"	240	Infinity			0.5652	Tissue__TCGA-LUAD
42727	Tissue	1	550	6.028E-5	="NA"	240	Infinity			0.851	Tissue__GTEx_normal
61197	Tissue	1	305	3.529E-4	="NA"	240	Infinity			0.6105	Tissue__TCGA-NORMAL
53537	Tissue	1	599	9.85E-4	="NA"	240	Infinity			0.8513	Tissue__GTEx_normal
42948	Tissue	1	727	5.608E-4	="NA"	240	Infinity			0.6147	Tissue__TCGA-LUSC
37104	Tissue	1	319	3.529E-4	="NA"	240	Infinity			0.6105	Tissue__TCGA-NORMAL
45422	Tissue	1	596	2.592E-4	="NA"	240	Infinity			0.8512	Tissue__GTEx_normal
54303	Tissue	1	345	3.529E-4	="NA"	241	Infinity			-0.6104	Tissue__TCGA-NORMAL
43585	Tissue	1	634	9.85E-4	="NA"	241	Infinity			0.8512	Tissue__GTEx_normal
61025	Tissue	1	307	3.529E-4	="NA"	241	Infinity			0.6104	Tissue__TCGA-NORMAL
62178	Tissue	1	559	2.592E-4	="NA"	241	Infinity			0.851	Tissue__GTEx_normal
52996	Tissue	1	315	2.635E-7	="NA"	241	Infinity			-0.5628	Tissue__TCGA-LUAD
65698	Tissue	1	295	5.941E-5	="NA"	241	Infinity			-0.61	Tissue__TCGA-NORMAL
43325	Tissue	1	60	1.833E-6	="NA"	241	Infinity			-0.5637	Tissue__TCGA-LUAD
44690	Tissue	2	721	5.608E-4	="NA"	241	Infinity			0.6145	Tissue__TCGA-LUSC
37095	Tissue	1	465	1.436E-9	="NA"	242	Infinity			0.6125	Tissue__TCGA-LUSC
59958	Tissue	1	543	2.29E-4	="NA"	242	Infinity			0.5638	Tissue__TCGA-LUAD
37072	Tissue	2	314	3.529E-4	="NA"	242	Infinity			0.6099	Tissue__TCGA-NORMAL
44689	Tissue	1	638	9.85E-4	="NA"	242	Infinity			0.8509	Tissue__GTEx_normal
63736	Tissue	1	481	1.071E-5	="NA"	243	Infinity			-0.5627	Tissue__TCGA-LUAD
51555	Tissue	1	432	1.833E-6	="NA"	243	Infinity			-0.5623	Tissue__TCGA-LUAD
37063	Tissue	1	330	3.529E-4	="NA"	243	Infinity			0.6096	Tissue__TCGA-NORMAL
37053	Tissue	1	260	5.941E-5	="NA"	243	Infinity			0.6093	Tissue__TCGA-NORMAL
37050	Tissue	1	732	5.608E-4	="NA"	243	Infinity			0.6142	Tissue__TCGA-LUSC
54128	Tissue	1	585	2.592E-4	="NA"	243	Infinity			0.8505	Tissue__GTEx_normal
65461	Tissue	1	292	3.122E-8	="NA"	243	Infinity			0.5612	Tissue__TCGA-LUAD
47449	Tissue	1	610	9.85E-4	="NA"	243	Infinity			0.8508	Tissue__GTEx_normal
37045	Tissue	1	481	1.071E-5	="NA"	243	Infinity			-0.5627	Tissue__TCGA-LUAD
37044	Tissue	1	334	3.529E-4	="NA"	244	Infinity			0.6093	Tissue__TCGA-NORMAL
48679	Tissue	1	44	5.608E-4	="NA"	244	Infinity			0.6141	Tissue__TCGA-LUSC
60880	Tissue	2	97	8.554E-4	="NA"	244	Infinity			0.5637	Tissue__TCGA-LUAD
37032	Tissue	1	322	5.941E-5	="NA"	244	Infinity			-0.6092	Tissue__TCGA-NORMAL
60782	Tissue	1	605	9.85E-4	="NA"	244	Infinity			0.8505	Tissue__GTEx_normal
44688	Tissue	1	604	9.85E-4	="NA"	244	Infinity			0.8505	Tissue__GTEx_normal
51097	Tissue	1	320	3.529E-4	="NA"	244	Infinity			0.6093	Tissue__TCGA-NORMAL
57647	Tissue	1	587	5.334E-5	="NA"	245	Infinity			0.5623	Tissue__TCGA-LUAD
58035	Tissue	1	538	6.028E-5	="NA"	245	Infinity			0.8502	Tissue__GTEx_normal
37558	Tissue	1	256	3.211E-5	="NA"	245	Infinity			0.613	Tissue__TCGA-LUSC
36997	Tissue	1	341	3.529E-4	="NA"	245	Infinity			0.6091	Tissue__TCGA-NORMAL
36963	Tissue	1	242	1.439E-4	="NA"	245	Infinity			0.6136	Tissue__TCGA-LUSC
36958	Tissue	1	361	5.608E-4	="NA"	245	Infinity			-0.614	Tissue__TCGA-LUSC
64491	Tissue	1	618	9.85E-4	="NA"	245	Infinity			0.8504	Tissue__GTEx_normal
50711	Tissue	1	68	1.071E-5	="NA"	245	Infinity			0.5618	Tissue__TCGA-LUAD
55653	Tissue	1	49	1.579E-8	="NA"	246	Infinity			-0.6121	Tissue__TCGA-LUSC
54302	Tissue	1	304	5.941E-5	="NA"	246	Infinity			0.6089	Tissue__TCGA-NORMAL
36954	Tissue	1	575	5.334E-5	="NA"	246	Infinity			0.5611	Tissue__TCGA-LUAD
48494	Tissue	1	718	5.608E-4	="NA"	246	Infinity			0.6138	Tissue__TCGA-LUSC
44022	Tissue	1	354	3.529E-4	="NA"	246	Infinity			-0.609	Tissue__TCGA-NORMAL
64490	Tissue	1	45	6.175E-6	="NA"	246	Infinity			-0.6126	Tissue__TCGA-LUSC
45421	Tissue	1	606	9.85E-4	="NA"	246	Infinity			0.8503	Tissue__GTEx_normal
44294	Tissue	1	490	1.439E-4	="NA"	247	Infinity			0.6127	Tissue__TCGA-LUSC
36920	Tissue	1	298	5.334E-5	="NA"	247	Infinity			-0.5607	Tissue__TCGA-LUAD
55813	Tissue	1	610	9.85E-4	="NA"	247	Infinity			0.8502	Tissue__GTEx_normal
56739	Tissue	1	44	5.608E-4	="NA"	247	Infinity			-0.6135	Tissue__TCGA-LUSC
36919	Tissue	1	276	5.941E-5	="NA"	247	Infinity			0.6087	Tissue__TCGA-NORMAL
64610	Tissue	1	486	1.071E-5	="NA"	247	Infinity			0.5605	Tissue__TCGA-LUAD
60903	Tissue	1	286	5.941E-5	="NA"	247	Infinity			0.6087	Tissue__TCGA-NORMAL
60215	Tissue	1	598	9.85E-4	="NA"	247	Infinity			0.8502	Tissue__GTEx_normal
60781	Tissue	1	553	2.592E-4	="NA"	247	Infinity			0.8498	Tissue__GTEx_normal
43938	Tissue	1	382	1.833E-6	="NA"	247	Infinity			-0.5601	Tissue__TCGA-LUAD
63248	Tissue	1	544	1.012E-6	="NA"	248	Infinity			0.6119	Tissue__TCGA-LUSC
50759	Tissue	1	301	5.941E-5	="NA"	248	Infinity			0.6081	Tissue__TCGA-NORMAL
36910	Tissue	1	560	3.211E-5	="NA"	248	Infinity			0.6124	Tissue__TCGA-LUSC
65697	Tissue	1	313	3.529E-4	="NA"	248	Infinity			0.6085	Tissue__TCGA-NORMAL
45948	Tissue	1	600	9.85E-4	="NA"	248	Infinity			0.8498	Tissue__GTEx_normal
36905	Tissue	1	107	6.175E-6	="NA"	248	Infinity			-0.6121	Tissue__TCGA-LUSC
36900	Tissue	1	301	5.941E-5	="NA"	248	Infinity			0.6081	Tissue__TCGA-NORMAL
53149	Tissue	1	583	2.592E-4	="NA"	248	Infinity			0.8496	Tissue__GTEx_normal
50710	Tissue	1	265	1.833E-6	="NA"	248	Infinity			0.56	Tissue__TCGA-LUAD
43937	Tissue	1	637	9.85E-4	="NA"	248	Infinity			0.8498	Tissue__GTEx_normal
40766	Tissue	1	715	5.608E-4	="NA"	249	Infinity			0.6126	Tissue__TCGA-LUSC
63701	Tissue	1	585	2.592E-4	="NA"	249	Infinity			0.8495	Tissue__GTEx_normal
47812	Tissue	1	292	3.529E-4	="NA"	249	Infinity			0.6077	Tissue__TCGA-NORMAL
38154	Tissue	1	78	2.29E-4	="NA"	249	Infinity			-0.56	Tissue__TCGA-LUAD
49958	Tissue	1	522	2.635E-7	="NA"	249	Infinity			0.5586	Tissue__TCGA-LUAD
36846	Tissue	1	112	5.334E-5	="NA"	249	Infinity			-0.5598	Tissue__TCGA-LUAD
48090	Tissue	1	331	3.529E-4	="NA"	249	Infinity			-0.6077	Tissue__TCGA-NORMAL
47967	Tissue	1	45	1.006E-10	="NA"	249	Infinity			-0.61	Tissue__TCGA-LUSC
52395	Tissue	2	550	8.554E-4	="NA"	250	Infinity			0.5592	Tissue__TCGA-LUAD
63152	Tissue	1	581	2.592E-4	="NA"	250	Infinity			0.8491	Tissue__GTEx_normal
57076	Tissue	1	610	9.85E-4	="NA"	250	Infinity			0.8492	Tissue__GTEx_normal
59996	Tissue	1	313	3.529E-4	="NA"	250	Infinity			0.6073	Tissue__TCGA-NORMAL
50833	Tissue	1	335	1.006E-10	="NA"	250	Infinity			0.6092	Tissue__TCGA-LUSC
42320	Tissue	1	314	5.941E-5	="NA"	250	Infinity			0.6071	Tissue__TCGA-NORMAL
36843	Tissue	1	52	5.334E-5	="NA"	251	Infinity			-0.5578	Tissue__TCGA-LUAD
36842	Tissue	1	655	5.608E-4	="NA"	251	Infinity			0.6117	Tissue__TCGA-LUSC
60961	Tissue	1	523	1.833E-6	="NA"	251	Infinity			0.5571	Tissue__TCGA-LUAD
66390	Tissue	1	621	8.554E-4	="NA"	251	Infinity			0.5587	Tissue__TCGA-LUAD
61843	Tissue	1	596	9.85E-4	="NA"	251	Infinity			0.8491	Tissue__GTEx_normal
39450	Tissue	1	608	3.211E-5	="NA"	251	Infinity			0.6107	Tissue__TCGA-LUSC
47889	Tissue	1	345	3.529E-4	="NA"	251	Infinity			0.607	Tissue__TCGA-NORMAL
53173	Tissue	1	515	1.012E-6	="NA"	252	Infinity			0.6098	Tissue__TCGA-LUSC
36830	Tissue	1	96	5.334E-5	="NA"	252	Infinity			0.5572	Tissue__TCGA-LUAD
54571	Tissue	1	605	9.85E-4	="NA"	252	Infinity			0.849	Tissue__GTEx_normal
37557	Tissue	1	288	5.608E-4	="NA"	252	Infinity			0.6111	Tissue__TCGA-LUSC
46160	Tissue	1	340	3.529E-4	="NA"	252	Infinity			-0.6065	Tissue__TCGA-NORMAL
36822	Tissue	1	82	1.833E-6	="NA"	252	Infinity			0.5567	Tissue__TCGA-LUAD
43539	Tissue	1	440	2.635E-7	="NA"	252	Infinity			0.5564	Tissue__TCGA-LUAD
59132	Tissue	1	731	5.608E-4	="NA"	253	Infinity			0.611	Tissue__TCGA-LUSC
63151	Tissue	1	583	2.592E-4	="NA"	253	Infinity			0.8486	Tissue__GTEx_normal
58034	Tissue	1	587	2.592E-4	="NA"	253	Infinity			0.8486	Tissue__GTEx_normal
53536	Tissue	2	606	1.439E-4	="NA"	253	Infinity			0.6107	Tissue__TCGA-LUSC
36996	Tissue	1	310	3.529E-4	="NA"	253	Infinity			0.6064	Tissue__TCGA-NORMAL
61729	Tissue	1	616	9.85E-4	="NA"	253	Infinity			0.8488	Tissue__GTEx_normal
36526	Tissue	1	328	3.529E-4	="NA"	253	Infinity			-0.6064	Tissue__TCGA-NORMAL
36518	Tissue	1	98	1.071E-5	="NA"	253	Infinity			-0.5564	Tissue__TCGA-LUAD
45420	Tissue	1	561	6.028E-5	="NA"	253	Infinity			0.8485	Tissue__GTEx_normal
36517	Tissue	1	311	5.941E-5	="NA"	254	Infinity			0.6061	Tissue__TCGA-NORMAL
50848	Tissue	1	50	1.236E-5	="NA"	254	Infinity			-0.8479	Tissue__GTEx_normal
37533	Tissue	2	715	5.608E-4	="NA"	254	Infinity			0.6108	Tissue__TCGA-LUSC
39286	Tissue	1	489	1.833E-6	="NA"	254	Infinity			0.5555	Tissue__TCGA-LUAD
36513	Tissue	1	508	5.334E-5	="NA"	254	Infinity			-0.5558	Tissue__TCGA-LUAD
36443	Tissue	1	308	3.529E-4	="NA"	254	Infinity			0.6063	Tissue__TCGA-NORMAL
36435	Tissue	1	322	3.529E-4	="NA"	255	Infinity			0.6061	Tissue__TCGA-NORMAL
36433	Tissue	1	730	5.608E-4	="NA"	255	Infinity			0.6107	Tissue__TCGA-LUSC
39706	Tissue	1	634	9.85E-4	="NA"	255	Infinity			0.8485	Tissue__GTEx_normal
52355	Tissue	1	580	8.554E-4	="NA"	255	Infinity			0.556	Tissue__TCGA-LUAD
56205	Tissue	1	536	1.071E-5	="NA"	255	Infinity			0.5555	Tissue__TCGA-LUAD
57624	Tissue	1	262	5.094E-12	="NA"	255	Infinity			0.6076	Tissue__TCGA-LUSC
63495	Tissue	1	581	8.554E-4	="NA"	256	Infinity			0.5556	Tissue__TCGA-LUAD
38070	Tissue	1	316	3.529E-4	="NA"	256	Infinity			0.6059	Tissue__TCGA-NORMAL
54650	Tissue	1	718	5.608E-4	="NA"	256	Infinity			0.6102	Tissue__TCGA-LUSC
60214	Tissue	1	556	6.028E-5	="NA"	256	Infinity			0.8478	Tissue__GTEx_normal
53148	Tissue	1	598	9.85E-4	="NA"	256	Infinity			0.8481	Tissue__GTEx_normal
57623	Tissue	1	533	1.071E-5	="NA"	256	Infinity			0.5551	Tissue__TCGA-LUAD
49555	Tissue	1	63	2.29E-4	="NA"	257	Infinity			0.5553	Tissue__TCGA-LUAD
36423	Tissue	1	477	1.579E-8	="NA"	257	Infinity			0.6084	Tissue__TCGA-LUSC
36420	Tissue	1	113	4.971E-16	="NA"	257	Infinity			0.6026	Tissue__TCGA-NORMAL
59275	Tissue	1	328	3.529E-4	="NA"	257	Infinity			0.6055	Tissue__TCGA-NORMAL
44687	Tissue	1	590	2.592E-4	="NA"	257	Infinity			0.8477	Tissue__GTEx_normal
45947	Tissue	1	585	2.592E-4	="NA"	258	Infinity			0.8474	Tissue__GTEx_normal
36418	Tissue	1	51	1.071E-5	="NA"	258	Infinity			-0.5548	Tissue__TCGA-LUAD
36417	Tissue	1	77	1.833E-6	="NA"	258	Infinity			-0.5546	Tissue__TCGA-LUAD
50238	Tissue	1	635	1.439E-4	="NA"	258	Infinity			0.6093	Tissue__TCGA-LUSC
51666	Tissue	1	569	2.592E-4	="NA"	258	Infinity			0.8474	Tissue__GTEx_normal
36416	Tissue	1	346	3.529E-4	="NA"	258	Infinity			0.6054	Tissue__TCGA-NORMAL
48089	Tissue	1	343	3.529E-4	="NA"	258	Infinity			-0.6054	Tissue__TCGA-NORMAL
36377	Tissue	1	667	5.608E-4	="NA"	259	Infinity			0.6095	Tissue__TCGA-LUSC
36365	Tissue	1	575	8.554E-4	="NA"	259	Infinity			0.5549	Tissue__TCGA-LUAD
42945	Tissue	1	610	9.85E-4	="NA"	259	Infinity			0.8473	Tissue__GTEx_normal
36364	Tissue	1	311	3.529E-4	="NA"	259	Infinity			-0.6053	Tissue__TCGA-NORMAL
66045	Tissue	1	394	1.236E-5	="NA"	259	Infinity			0.8466	Tissue__GTEx_normal
43538	Tissue	1	412	2.635E-7	="NA"	259	Infinity			0.5539	Tissue__TCGA-LUAD
56128	Tissue	1	50	5.608E-4	="NA"	260	Infinity			-0.6093	Tissue__TCGA-LUSC
59131	Tissue	1	606	9.85E-4	="NA"	260	Infinity			0.8471	Tissue__GTEx_normal
61024	Tissue	1	268	3.529E-4	="NA"	260	Infinity			0.6047	Tissue__TCGA-NORMAL
66085	Tissue	1	539	1.439E-4	="NA"	260	Infinity			0.6089	Tissue__TCGA-LUSC
52927	Tissue	1	407	1.071E-5	="NA"	260	Infinity			0.5542	Tissue__TCGA-LUAD
44163	Tissue	1	599	9.85E-4	="NA"	260	Infinity			0.8471	Tissue__GTEx_normal
36359	Tissue	1	49	1.012E-6	="NA"	260	Infinity			0.6078	Tissue__TCGA-LUSC
41571	Tissue	1	228	2.592E-4	="NA"	260	Infinity			0.8467	Tissue__GTEx_normal
37107	Tissue	1	147	1.439E-4	="NA"	260	Infinity			-0.6089	Tissue__TCGA-LUSC
54875	Tissue	1	608	9.85E-4	="NA"	260	Infinity			0.8471	Tissue__GTEx_normal
54301	Tissue	1	313	3.529E-4	="NA"	261	Infinity			-0.6043	Tissue__TCGA-NORMAL
51514	Tissue	1	85	1.393E-7	="NA"	261	Infinity			-0.6073	Tissue__TCGA-LUSC
36354	Tissue	1	220	2.592E-4	="NA"	261	Infinity			0.8464	Tissue__GTEx_normal
36351	Tissue	1	71	2.29E-4	="NA"	261	Infinity			-0.5545	Tissue__TCGA-LUAD
36350	Tissue	1	599	1.439E-4	="NA"	262	Infinity			0.6086	Tissue__TCGA-LUSC
36348	Tissue	2	680	5.608E-4	="NA"	262	Infinity			0.6089	Tissue__TCGA-LUSC
36297	Tissue	1	54	1.071E-5	="NA"	262	Infinity			-0.5538	Tissue__TCGA-LUAD
37615	Tissue	1	380	1.006E-10	="NA"	262	Infinity			0.6051	Tissue__TCGA-LUSC
36295	Tissue	1	92	2.965E-9	="NA"	262	Infinity			0.5529	Tissue__TCGA-LUAD
36260	Tissue	1	698	5.608E-4	="NA"	262	Infinity			0.6089	Tissue__TCGA-LUSC
44021	Tissue	1	357	3.529E-4	="NA"	262	Infinity			-0.6036	Tissue__TCGA-NORMAL
51665	Tissue	1	555	2.592E-4	="NA"	262	Infinity			0.8463	Tissue__GTEx_normal
39449	Tissue	1	381	1.393E-7	="NA"	262	Infinity			0.6067	Tissue__TCGA-LUSC
47448	Tissue	1	601	9.85E-4	="NA"	262	Infinity			0.8464	Tissue__GTEx_normal
44769	Tissue	1	626	5.608E-4	="NA"	263	Infinity			0.6087	Tissue__TCGA-LUSC
48423	Tissue	1	317	3.529E-4	="NA"	263	Infinity			0.6033	Tissue__TCGA-NORMAL
49074	Tissue	1	600	9.85E-4	="NA"	263	Infinity			0.8461	Tissue__GTEx_normal
60486	Tissue	1	525	6.028E-5	="NA"	263	Infinity			0.8459	Tissue__GTEx_normal
38321	Tissue	1	50	1.071E-5	="NA"	263	Infinity			-0.5535	Tissue__TCGA-LUAD
65316	Tissue	1	576	2.592E-4	="NA"	263	Infinity			0.846	Tissue__GTEx_normal
51096	Tissue	1	296	3.529E-4	="NA"	263	Infinity			-0.6033	Tissue__TCGA-NORMAL
36056	Tissue	1	192	6.175E-6	="NA"	264	Infinity			-0.6067	Tissue__TCGA-LUSC
58033	Tissue	1	534	6.028E-5	="NA"	264	Infinity			0.8458	Tissue__GTEx_normal
36055	Tissue	1	48	3.211E-5	="NA"	264	Infinity			0.6073	Tissue__TCGA-LUSC
49931	Tissue	2	93	6.175E-6	="NA"	264	Infinity			0.6067	Tissue__TCGA-LUSC
48088	Tissue	1	288	3.529E-4	="NA"	264	Infinity			0.6031	Tissue__TCGA-NORMAL
45419	Tissue	1	427	1.071E-5	="NA"	264	Infinity			-0.5534	Tissue__TCGA-LUAD
36045	Tissue	1	273	3.529E-4	="NA"	264	Infinity			0.6031	Tissue__TCGA-NORMAL
54300	Tissue	1	330	3.529E-4	="NA"	265	Infinity			0.6026	Tissue__TCGA-NORMAL
60308	Tissue	1	435	1.071E-5	="NA"	265	Infinity			0.553	Tissue__TCGA-LUAD
52545	Tissue	1	86	5.608E-4	="NA"	265	Infinity			0.6084	Tissue__TCGA-LUSC
39911	Tissue	1	597	9.85E-4	="NA"	265	Infinity			0.8459	Tissue__GTEx_normal
51095	Tissue	1	337	3.529E-4	="NA"	265	Infinity			0.6026	Tissue__TCGA-NORMAL
60586	Tissue	1	613	9.85E-4	="NA"	266	Infinity			0.8458	Tissue__GTEx_normal
46660	Tissue	1	613	9.85E-4	="NA"	266	Infinity			0.8458	Tissue__GTEx_normal
49930	Tissue	1	549	2.29E-4	="NA"	266	Infinity			0.5532	Tissue__TCGA-LUAD
45969	Tissue	1	114	1.439E-4	="NA"	266	Infinity			-0.6059	Tissue__TCGA-LUSC
49500	Tissue	1	290	2.29E-4	="NA"	266	Infinity			0.5532	Tissue__TCGA-LUAD
49214	Tissue	1	610	9.85E-4	="NA"	266	Infinity			0.8458	Tissue__GTEx_normal
36025	Tissue	2	55	1.833E-6	="NA"	266	Infinity			0.5528	Tissue__TCGA-LUAD
38370	Tissue	1	323	3.529E-4	="NA"	266	Infinity			0.6024	Tissue__TCGA-NORMAL
36024	Tissue	1	343	3.529E-4	="NA"	267	Infinity			0.6023	Tissue__TCGA-NORMAL
35998	Tissue	1	699	5.608E-4	="NA"	267	Infinity			0.6058	Tissue__TCGA-LUSC
36995	Tissue	1	316	3.529E-4	="NA"	267	Infinity			0.6023	Tissue__TCGA-NORMAL
65315	Tissue	1	596	2.592E-4	="NA"	267	Infinity			0.8456	Tissue__GTEx_normal
60879	Tissue	1	189	2.29E-4	="NA"	267	Infinity			0.553	Tissue__TCGA-LUAD
60213	Tissue	1	617	9.85E-4	="NA"	267	Infinity			0.8457	Tissue__GTEx_normal
47447	Tissue	1	507	2.635E-7	="NA"	267	Infinity			-0.5523	Tissue__TCGA-LUAD
37166	Tissue	1	466	1.393E-7	="NA"	267	Infinity			0.6043	Tissue__TCGA-LUSC
52813	Tissue	1	144	5.608E-4	="NA"	268	Infinity			0.6055	Tissue__TCGA-LUSC
53592	Tissue	1	627	9.85E-4	="NA"	268	Infinity			0.8456	Tissue__GTEx_normal
52757	Tissue	1	434	1.071E-5	="NA"	268	Infinity			-0.5526	Tissue__TCGA-LUAD
63700	Tissue	1	623	9.85E-4	="NA"	268	Infinity			0.8456	Tissue__GTEx_normal
42840	Tissue	1	354	3.529E-4	="NA"	268	Infinity			-0.6022	Tissue__TCGA-NORMAL
39914	Tissue	1	458	1.833E-6	="NA"	269	Infinity			0.5511	Tissue__TCGA-LUAD
46803	Tissue	1	326	3.529E-4	="NA"	269	Infinity			0.6021	Tissue__TCGA-NORMAL
45673	Tissue	1	595	1.439E-4	="NA"	269	Infinity			0.6046	Tissue__TCGA-LUSC
45946	Tissue	1	600	9.85E-4	="NA"	269	Infinity			0.8455	Tissue__GTEx_normal
45676	Tissue	1	344	3.211E-5	="NA"	269	Infinity			0.6044	Tissue__TCGA-LUSC
64489	Tissue	1	589	2.592E-4	="NA"	269	Infinity			0.8454	Tissue__GTEx_normal
41574	Tissue	1	116	5.334E-5	="NA"	269	Infinity			-0.5523	Tissue__TCGA-LUAD
63150	Tissue	1	551	2.592E-4	="NA"	270	Infinity			0.8453	Tissue__GTEx_normal
60485	Tissue	1	266	3.122E-8	="NA"	270	Infinity			-0.5506	Tissue__TCGA-LUAD
61728	Tissue	1	624	9.85E-4	="NA"	270	Infinity			0.8454	Tissue__GTEx_normal
54721	Tissue	1	719	5.608E-4	="NA"	270	Infinity			-0.6047	Tissue__TCGA-LUSC
35891	Tissue	1	339	3.529E-4	="NA"	270	Infinity			0.6016	Tissue__TCGA-NORMAL
46825	Tissue	1	617	9.85E-4	="NA"	271	Infinity			0.8453	Tissue__GTEx_normal
35882	Tissue	1	581	6.175E-6	="NA"	271	Infinity			0.6038	Tissue__TCGA-LUSC
54570	Tissue	1	602	9.85E-4	="NA"	271	Infinity			0.8453	Tissue__GTEx_normal
37094	Tissue	1	323	3.529E-4	="NA"	271	Infinity			0.6015	Tissue__TCGA-NORMAL
63699	Tissue	1	491	1.071E-5	="NA"	271	Infinity			-0.551	Tissue__TCGA-LUAD
44162	Tissue	1	584	2.592E-4	="NA"	271	Infinity			0.8451	Tissue__GTEx_normal
35880	Tissue	1	685	5.608E-4	="NA"	272	Infinity			0.6045	Tissue__TCGA-LUSC
35870	Tissue	1	579	8.554E-4	="NA"	272	Infinity			0.5515	Tissue__TCGA-LUAD
52409	Tissue	1	535	1.071E-5	="NA"	272	Infinity			0.5509	Tissue__TCGA-LUAD
66074	Tissue	2	293	1.439E-4	="NA"	272	Infinity			0.6043	Tissue__TCGA-LUSC
35715	Tissue	1	328	3.529E-4	="NA"	272	Infinity			-0.6014	Tissue__TCGA-NORMAL
61842	Tissue	1	608	9.85E-4	="NA"	272	Infinity			0.8451	Tissue__GTEx_normal
60780	Tissue	1	529	6.028E-5	="NA"	272	Infinity			0.8448	Tissue__GTEx_normal
53147	Tissue	1	594	2.592E-4	="NA"	272	Infinity			0.8449	Tissue__GTEx_normal
43936	Tissue	1	39	1.579E-8	="NA"	272	Infinity			-0.6032	Tissue__TCGA-LUSC
45945	Tissue	1	577	2.592E-4	="NA"	273	Infinity			0.8448	Tissue__GTEx_normal
35707	Tissue	1	313	3.529E-4	="NA"	273	Infinity			-0.6011	Tissue__TCGA-NORMAL
63822	Tissue	1	562	2.29E-4	="NA"	273	Infinity			0.5509	Tissue__TCGA-LUAD
55512	Tissue	2	547	1.012E-6	="NA"	273	Infinity			0.6033	Tissue__TCGA-LUSC
64488	Tissue	1	594	2.592E-4	="NA"	273	Infinity			0.8448	Tissue__GTEx_normal
57622	Tissue	2	550	1.071E-5	="NA"	273	Infinity			0.5492	Tissue__TCGA-LUAD
40798	Tissue	1	705	5.608E-4	="NA"	273	Infinity			0.6044	Tissue__TCGA-LUSC
50709	Tissue	1	274	1.833E-6	="NA"	273	Infinity			0.5488	Tissue__TCGA-LUAD
53325	Tissue	1	329	3.529E-4	="NA"	274	Infinity			0.6005	Tissue__TCGA-NORMAL
59433	Tissue	2	55	3.122E-8	="NA"	274	Infinity			0.5481	Tissue__TCGA-LUAD
53535	Tissue	1	695	5.608E-4	="NA"	274	Infinity			0.604	Tissue__TCGA-LUSC
62855	Tissue	1	640	1.439E-4	="NA"	274	Infinity			0.6037	Tissue__TCGA-LUSC
47446	Tissue	1	570	2.592E-4	="NA"	274	Infinity			0.8446	Tissue__GTEx_normal
45418	Tissue	1	601	2.592E-4	="NA"	274	Infinity			0.8446	Tissue__GTEx_normal
35693	Tissue	1	624	5.334E-5	="NA"	275	Infinity			0.5488	Tissue__TCGA-LUAD
63454	Tissue	1	271	3.529E-4	="NA"	275	Infinity			-0.6003	Tissue__TCGA-NORMAL
35662	Tissue	1	39	3.211E-5	="NA"	275	Infinity			-0.6032	Tissue__TCGA-LUSC
60021	Tissue	1	50	1.439E-4	="NA"	275	Infinity			0.6035	Tissue__TCGA-LUSC
51475	Tissue	1	550	6.028E-5	="NA"	275	Infinity			0.8441	Tissue__GTEx_normal
35659	Tissue	1	339	3.529E-4	="NA"	276	Infinity			0.5997	Tissue__TCGA-NORMAL
37105	Tissue	1	46	1.012E-6	="NA"	276	Infinity			-0.6025	Tissue__TCGA-LUSC
35655	Tissue	1	54	5.334E-5	="NA"	276	Infinity			-0.5482	Tissue__TCGA-LUAD
50237	Tissue	1	675	1.439E-4	="NA"	276	Infinity			0.6032	Tissue__TCGA-LUSC
52222	Tissue	1	344	1.236E-5	="NA"	276	Infinity			0.8439	Tissue__GTEx_normal
64487	Tissue	1	612	9.85E-4	="NA"	276	Infinity			0.8442	Tissue__GTEx_normal
60779	Tissue	1	605	9.85E-4	="NA"	276	Infinity			0.8442	Tissue__GTEx_normal
35653	Tissue	1	85	2.29E-4	="NA"	276	Infinity			-0.5485	Tissue__TCGA-LUAD
43935	Tissue	1	501	2.635E-7	="NA"	276	Infinity			-0.5478	Tissue__TCGA-LUAD
59190	Tissue	1	446	1.071E-5	="NA"	277	Infinity			-0.548	Tissue__TCGA-LUAD
65696	Tissue	1	323	1.236E-5	="NA"	277	Infinity			0.8438	Tissue__GTEx_normal
66246	Tissue	1	355	3.529E-4	="NA"	277	Infinity			-0.5995	Tissue__TCGA-NORMAL
35650	Tissue	1	320	3.529E-4	="NA"	277	Infinity			0.5995	Tissue__TCGA-NORMAL
52544	Tissue	1	92	1.439E-4	="NA"	277	Infinity			0.6031	Tissue__TCGA-LUSC
40202	Tissue	1	141	1.393E-7	="NA"	277	Infinity			-0.6014	Tissue__TCGA-LUSC
35632	Tissue	1	138	1.012E-6	="NA"	277	Infinity			-0.6019	Tissue__TCGA-LUSC
51094	Tissue	1	382	3.211E-5	="NA"	277	Infinity			0.6026	Tissue__TCGA-LUSC
44768	Tissue	1	607	1.439E-4	="NA"	278	Infinity			0.6029	Tissue__TCGA-LUSC
63231	Tissue	2	229	1.439E-4	="NA"	278	Infinity			0.6029	Tissue__TCGA-LUSC
48302	Tissue	1	510	1.071E-5	="NA"	278	Infinity			0.5478	Tissue__TCGA-LUAD
35631	Tissue	1	364	3.529E-4	="NA"	278	Infinity			0.5994	Tissue__TCGA-NORMAL
47445	Tissue	1	627	9.85E-4	="NA"	278	Infinity			0.844	Tissue__GTEx_normal
57075	Tissue	1	591	2.592E-4	="NA"	279	Infinity			0.8438	Tissue__GTEx_normal
35624	Tissue	1	421	1.006E-10	="NA"	279	Infinity			0.6008	Tissue__TCGA-LUSC
42088	Tissue	1	596	9.85E-4	="NA"	279	Infinity			0.8439	Tissue__GTEx_normal
47750	Tissue	1	353	3.529E-4	="NA"	279	Infinity			0.5986	Tissue__TCGA-NORMAL
35608	Tissue	1	138	1.071E-5	="NA"	279	Infinity			0.5472	Tissue__TCGA-LUAD
63230	Tissue	1	579	6.175E-6	="NA"	280	Infinity			0.6013	Tissue__TCGA-LUSC
35607	Tissue	1	349	3.529E-4	="NA"	280	Infinity			-0.5982	Tissue__TCGA-NORMAL
35586	Tissue	2	667	5.608E-4	="NA"	280	Infinity			0.6029	Tissue__TCGA-LUSC
59274	Tissue	1	304	5.941E-5	="NA"	280	Infinity			0.5981	Tissue__TCGA-NORMAL
35581	Tissue	1	532	6.175E-6	="NA"	280	Infinity			0.6013	Tissue__TCGA-LUSC
43537	Tissue	1	408	3.122E-8	="NA"	280	Infinity			0.5456	Tissue__TCGA-LUAD
54874	Tissue	1	559	2.592E-4	="NA"	280	Infinity			0.8437	Tissue__GTEx_normal
35579	Tissue	1	100	1.833E-6	="NA"	281	Infinity			0.5461	Tissue__TCGA-LUAD
54299	Tissue	1	349	3.529E-4	="NA"	281	Infinity			-0.5974	Tissue__TCGA-NORMAL
35578	Tissue	1	395	5.094E-12	="NA"	281	Infinity			0.6001	Tissue__TCGA-LUSC
50832	Tissue	1	394	1.436E-9	="NA"	281	Infinity			0.6005	Tissue__TCGA-LUSC
56204	Tissue	2	554	1.071E-5	="NA"	281	Infinity			0.5462	Tissue__TCGA-LUAD
47444	Tissue	1	631	9.85E-4	="NA"	281	Infinity			0.8436	Tissue__GTEx_normal
35577	Tissue	1	53	8.554E-4	="NA"	281	Infinity			-0.5473	Tissue__TCGA-LUAD
63149	Tissue	1	582	2.592E-4	="NA"	282	Infinity			0.8434	Tissue__GTEx_normal
35576	Tissue	1	51	1.071E-5	="NA"	282	Infinity			-0.5461	Tissue__TCGA-LUAD
35575	Tissue	1	207	1.012E-6	="NA"	282	Infinity			-0.6009	Tissue__TCGA-LUSC
49213	Tissue	1	638	9.85E-4	="NA"	282	Infinity			0.8435	Tissue__GTEx_normal
35574	Tissue	1	296	3.529E-4	="NA"	282	Infinity			0.5969	Tissue__TCGA-NORMAL
53014	Tissue	1	341	3.529E-4	="NA"	283	Infinity			-0.5968	Tissue__TCGA-NORMAL
53734	Tissue	1	559	8.554E-4	="NA"	283	Infinity			0.547	Tissue__TCGA-LUAD
51513	Tissue	1	77	1.579E-8	="NA"	283	Infinity			-0.6005	Tissue__TCGA-LUSC
62177	Tissue	1	619	9.85E-4	="NA"	283	Infinity			0.8434	Tissue__GTEx_normal
46243	Tissue	1	344	3.529E-4	="NA"	283	Infinity			0.5968	Tissue__TCGA-NORMAL
52995	Tissue	1	269	2.635E-7	="NA"	283	Infinity			-0.544	Tissue__TCGA-LUAD
42726	Tissue	1	534	6.028E-5	="NA"	283	Infinity			0.8432	Tissue__GTEx_normal
42944	Tissue	1	479	1.833E-6	="NA"	283	Infinity			-0.5442	Tissue__TCGA-LUAD
49073	Tissue	1	576	2.592E-4	="NA"	283	Infinity			0.8433	Tissue__GTEx_normal
65314	Tissue	1	579	2.592E-4	="NA"	283	Infinity			0.8433	Tissue__GTEx_normal
35569	Tissue	1	653	1.439E-4	="NA"	283	Infinity			0.6012	Tissue__TCGA-LUSC
52994	Tissue	1	301	1.833E-6	="NA"	284	Infinity			-0.544	Tissue__TCGA-LUAD
43011	Tissue	1	478	3.211E-5	="NA"	284	Infinity			0.6009	Tissue__TCGA-LUSC
65695	Tissue	1	280	5.941E-5	="NA"	284	Infinity			0.5964	Tissue__TCGA-NORMAL
51664	Tissue	1	585	9.85E-4	="NA"	284	Infinity			0.8432	Tissue__GTEx_normal
35420	Tissue	1	400	1.006E-10	="NA"	284	Infinity			0.5998	Tissue__TCGA-LUSC
41986	Tissue	1	336	3.529E-4	="NA"	284	Infinity			0.5967	Tissue__TCGA-NORMAL
50020	Tissue	1	553	2.592E-4	="NA"	285	Infinity			0.8428	Tissue__GTEx_normal
35418	Tissue	1	712	5.608E-4	="NA"	285	Infinity			0.6012	Tissue__TCGA-LUSC
59130	Tissue	1	607	9.85E-4	="NA"	285	Infinity			0.843	Tissue__GTEx_normal
58081	Tissue	1	129	6.175E-6	="NA"	285	Infinity			-0.6007	Tissue__TCGA-LUSC
35413	Tissue	1	326	3.529E-4	="NA"	285	Infinity			-0.5964	Tissue__TCGA-NORMAL
51093	Tissue	1	503	2.635E-7	="NA"	285	Infinity			0.5435	Tissue__TCGA-LUAD
47443	Tissue	1	496	1.833E-6	="NA"	285	Infinity			0.5436	Tissue__TCGA-LUAD
37093	Tissue	1	385	3.122E-8	="NA"	286	Infinity			0.5429	Tissue__TCGA-LUAD
59432	Tissue	1	581	2.592E-4	="NA"	286	Infinity			0.8427	Tissue__GTEx_normal
46159	Tissue	1	621	5.608E-4	="NA"	286	Infinity			0.6011	Tissue__TCGA-LUSC
35321	Tissue	1	358	3.529E-4	="NA"	286	Infinity			-0.5961	Tissue__TCGA-NORMAL
35260	Tissue	2	67	5.941E-5	="NA"	286	Infinity			-0.596	Tissue__TCGA-NORMAL
35257	Tissue	1	131	2.29E-4	="NA"	286	Infinity			-0.5439	Tissue__TCGA-LUAD
37098	Tissue	1	344	3.529E-4	="NA"	287	Infinity			0.5959	Tissue__TCGA-NORMAL
54298	Tissue	1	342	3.529E-4	="NA"	287	Infinity			-0.5959	Tissue__TCGA-NORMAL
40972	Tissue	2	710	5.608E-4	="NA"	287	Infinity			0.601	Tissue__TCGA-LUSC
42450	Tissue	1	398	5.334E-5	="NA"	287	Infinity			-0.5433	Tissue__TCGA-LUAD
41563	Tissue	1	574	2.592E-4	="NA"	287	Infinity			0.8425	Tissue__GTEx_normal
40114	Tissue	1	548	1.833E-6	="NA"	288	Infinity			0.5423	Tissue__TCGA-LUAD
35256	Tissue	1	47	1.436E-9	="NA"	288	Infinity			-0.5986	Tissue__TCGA-LUSC
56389	Tissue	1	596	9.85E-4	="NA"	288	Infinity			0.8424	Tissue__GTEx_normal
53243	Tissue	2	728	5.608E-4	="NA"	288	Infinity			0.6005	Tissue__TCGA-LUSC
42677	Tissue	1	440	1.236E-5	="NA"	288	Infinity			0.842	Tissue__GTEx_normal
66335	Tissue	1	356	3.529E-4	="NA"	288	Infinity			0.5957	Tissue__TCGA-NORMAL
47749	Tissue	1	355	3.529E-4	="NA"	288	Infinity			-0.5957	Tissue__TCGA-NORMAL
51474	Tissue	1	582	2.592E-4	="NA"	288	Infinity			0.8422	Tissue__GTEx_normal
37173	Tissue	1	705	5.608E-4	="NA"	289	Infinity			0.6002	Tissue__TCGA-LUSC
55641	Tissue	1	321	3.529E-4	="NA"	289	Infinity			-0.5955	Tissue__TCGA-NORMAL
59995	Tissue	1	355	6.028E-5	="NA"	289	Infinity			0.842	Tissue__GTEx_normal
39910	Tissue	1	605	9.85E-4	="NA"	289	Infinity			0.8422	Tissue__GTEx_normal
60778	Tissue	1	550	2.592E-4	="NA"	289	Infinity			0.8421	Tissue__GTEx_normal
35231	Tissue	1	473	3.122E-8	="NA"	289	Infinity			0.5416	Tissue__TCGA-LUAD
35214	Tissue	1	613	8.554E-4	="NA"	289	Infinity			-0.5431	Tissue__TCGA-LUAD
35212	Tissue	1	226	9.85E-4	="NA"	290	Infinity			0.842	Tissue__GTEx_normal
46798	Tissue	1	96	2.29E-4	="NA"	290	Infinity			-0.5428	Tissue__TCGA-LUAD
55582	Tissue	1	627	9.85E-4	="NA"	290	Infinity			0.842	Tissue__GTEx_normal
35211	Tissue	1	70	2.29E-4	="NA"	290	Infinity			0.5428	Tissue__TCGA-LUAD
49093	Tissue	1	457	1.393E-7	="NA"	290	Infinity			0.5987	Tissue__TCGA-LUSC
42279	Tissue	1	623	9.85E-4	="NA"	290	Infinity			0.842	Tissue__GTEx_normal
35210	Tissue	1	322	3.529E-4	="NA"	290	Infinity			-0.5954	Tissue__TCGA-NORMAL
57621	Tissue	1	268	2.965E-9	="NA"	290	Infinity			0.5406	Tissue__TCGA-LUAD
35205	Tissue	1	272	8.631E-6	="NA"	291	Infinity			-0.5947	Tissue__TCGA-NORMAL
63735	Tissue	1	650	5.334E-5	="NA"	291	Infinity			0.5417	Tissue__TCGA-LUAD
35180	Tissue	1	68	5.608E-4	="NA"	291	Infinity			0.6	Tissue__TCGA-LUSC
60212	Tissue	1	608	9.85E-4	="NA"	291	Infinity			0.8419	Tissue__GTEx_normal
45640	Tissue	1	347	3.529E-4	="NA"	291	Infinity			0.5951	Tissue__TCGA-NORMAL
59660	Tissue	1	564	5.334E-5	="NA"	291	Infinity			0.5417	Tissue__TCGA-LUAD
35167	Tissue	1	334	3.529E-4	="NA"	292	Infinity			-0.595	Tissue__TCGA-NORMAL
60878	Tissue	1	123	8.554E-4	="NA"	292	Infinity			-0.5418	Tissue__TCGA-LUAD
37145	Tissue	1	688	1.439E-4	="NA"	292	Infinity			0.5993	Tissue__TCGA-LUSC
61841	Tissue	1	587	9.85E-4	="NA"	292	Infinity			0.8417	Tissue__GTEx_normal
45417	Tissue	1	627	9.85E-4	="NA"	292	Infinity			0.8417	Tissue__GTEx_normal
35165	Tissue	1	270	3.529E-4	="NA"	293	Infinity			-0.5945	Tissue__TCGA-NORMAL
35149	Tissue	1	334	9.85E-4	="NA"	293	Infinity			0.8415	Tissue__GTEx_normal
53534	Tissue	1	627	9.85E-4	="NA"	293	Infinity			0.8415	Tissue__GTEx_normal
54649	Tissue	1	711	5.608E-4	="NA"	293	Infinity			0.5996	Tissue__TCGA-LUSC
43536	Tissue	1	397	2.635E-7	="NA"	293	Infinity			-0.5399	Tissue__TCGA-LUAD
54297	Tissue	1	321	3.529E-4	="NA"	294	Infinity			0.5943	Tissue__TCGA-NORMAL
35692	Tissue	1	131	1.439E-4	="NA"	294	Infinity			-0.5988	Tissue__TCGA-LUSC
41864	Tissue	1	283	3.529E-4	="NA"	294	Infinity			0.5943	Tissue__TCGA-NORMAL
54648	Tissue	1	489	1.393E-7	="NA"	294	Infinity			0.598	Tissue__TCGA-LUSC
49499	Tissue	1	544	8.554E-4	="NA"	294	Infinity			0.5412	Tissue__TCGA-LUAD
47748	Tissue	1	591	6.175E-6	="NA"	294	Infinity			0.5984	Tissue__TCGA-LUSC
60777	Tissue	1	626	9.85E-4	="NA"	294	Infinity			0.8414	Tissue__GTEx_normal
37858	Tissue	1	588	8.554E-4	="NA"	295	Infinity			0.541	Tissue__TCGA-LUAD
40962	Tissue	1	602	3.211E-5	="NA"	295	Infinity			0.5984	Tissue__TCGA-LUSC
35142	Tissue	1	45	1.393E-7	="NA"	295	Infinity			0.5979	Tissue__TCGA-LUSC
50236	Tissue	2	714	5.608E-4	="NA"	295	Infinity			0.5991	Tissue__TCGA-LUSC
56540	Tissue	1	338	3.529E-4	="NA"	295	Infinity			0.5938	Tissue__TCGA-NORMAL
45416	Tissue	1	616	9.85E-4	="NA"	295	Infinity			0.8412	Tissue__GTEx_normal
58416	Tissue	1	591	2.592E-4	="NA"	296	Infinity			0.841	Tissue__GTEx_normal
53591	Tissue	1	638	9.85E-4	="NA"	296	Infinity			0.8411	Tissue__GTEx_normal
50706	Tissue	1	232	1.579E-8	="NA"	296	Infinity			0.597	Tissue__TCGA-LUSC
35114	Tissue	1	331	3.529E-4	="NA"	296	Infinity			-0.5935	Tissue__TCGA-NORMAL
48301	Tissue	2	606	5.334E-5	="NA"	296	Infinity			0.5397	Tissue__TCGA-LUAD
35090	Tissue	1	296	5.941E-5	="NA"	296	Infinity			0.5931	Tissue__TCGA-NORMAL
60484	Tissue	1	511	1.236E-5	="NA"	296	Infinity			0.8408	Tissue__GTEx_normal
54873	Tissue	1	581	2.592E-4	="NA"	296	Infinity			0.841	Tissue__GTEx_normal
51554	Tissue	1	410	1.833E-6	="NA"	297	Infinity			-0.5385	Tissue__TCGA-LUAD
43081	Tissue	1	355	3.529E-4	="NA"	297	Infinity			0.5931	Tissue__TCGA-NORMAL
50831	Tissue	1	359	1.436E-9	="NA"	297	Infinity			0.596	Tissue__TCGA-LUSC
65313	Tissue	1	568	2.592E-4	="NA"	297	Infinity			0.8408	Tissue__GTEx_normal
49212	Tissue	1	608	9.85E-4	="NA"	297	Infinity			0.8409	Tissue__GTEx_normal
35070	Tissue	1	367	1.012E-6	="NA"	297	Infinity			0.5974	Tissue__TCGA-LUSC
35069	Tissue	1	341	1.071E-5	="NA"	297	Infinity			0.5386	Tissue__TCGA-LUAD
53733	Tissue	1	515	8.554E-4	="NA"	298	Infinity			0.539	Tissue__TCGA-LUAD
48422	Tissue	1	313	3.529E-4	="NA"	298	Infinity			0.5927	Tissue__TCGA-NORMAL
58061	Tissue	1	332	1.006E-10	="NA"	298	Infinity			0.5956	Tissue__TCGA-LUSC
50830	Tissue	1	531	1.579E-8	="NA"	298	Infinity			0.5962	Tissue__TCGA-LUSC
53533	Tissue	1	397	1.833E-6	="NA"	298	Infinity			-0.5372	Tissue__TCGA-LUAD
53275	Tissue	1	172	1.071E-5	="NA"	298	Infinity			0.5375	Tissue__TCGA-LUAD
49408	Tissue	1	309	5.941E-5	="NA"	298	Infinity			0.5925	Tissue__TCGA-NORMAL
41562	Tissue	1	588	2.592E-4	="NA"	298	Infinity			0.8407	Tissue__GTEx_normal
45415	Tissue	1	563	2.592E-4	="NA"	298	Infinity			0.8407	Tissue__GTEx_normal
35034	Tissue	1	118	1.833E-6	="NA"	299	Infinity			-0.537	Tissue__TCGA-LUAD
63734	Tissue	1	601	1.071E-5	="NA"	299	Infinity			0.5372	Tissue__TCGA-LUAD
35032	Tissue	1	454	1.833E-6	="NA"	299	Infinity			0.537	Tissue__TCGA-LUAD
63698	Tissue	1	616	9.85E-4	="NA"	299	Infinity			0.8407	Tissue__GTEx_normal
45944	Tissue	1	589	9.85E-4	="NA"	299	Infinity			0.8407	Tissue__GTEx_normal
56434	Tissue	1	325	3.529E-4	="NA"	299	Infinity			0.5921	Tissue__TCGA-NORMAL
64682	Tissue	1	554	6.175E-6	="NA"	299	Infinity			0.597	Tissue__TCGA-LUSC
54296	Tissue	1	265	8.631E-6	="NA"	300	Infinity			0.5907	Tissue__TCGA-NORMAL
64941	Tissue	1	597	2.592E-4	="NA"	300	Infinity			0.8404	Tissue__GTEx_normal
35030	Tissue	1	553	1.071E-5	="NA"	300	Infinity			-0.5368	Tissue__TCGA-LUAD
53532	Tissue	1	712	5.608E-4	="NA"	300	Infinity			0.5981	Tissue__TCGA-LUSC
39909	Tissue	1	590	9.85E-4	="NA"	300	Infinity			0.8406	Tissue__GTEx_normal
52354	Tissue	1	577	6.175E-6	="NA"	300	Infinity			0.5966	Tissue__TCGA-LUSC
64486	Tissue	1	638	9.85E-4	="NA"	300	Infinity			0.8406	Tissue__GTEx_normal
51092	Tissue	1	345	3.529E-4	="NA"	300	Infinity			0.5909	Tissue__TCGA-NORMAL
61595	Tissue	1	440	1.833E-6	="NA"	300	Infinity			0.5365	Tissue__TCGA-LUAD
58469	Tissue	1	642	9.85E-4	="NA"	301	Infinity			0.8404	Tissue__GTEx_normal
35010	Tissue	1	325	3.529E-4	="NA"	301	Infinity			0.5908	Tissue__TCGA-NORMAL
37556	Tissue	1	351	1.439E-4	="NA"	301	Infinity			0.597	Tissue__TCGA-LUSC
36358	Tissue	1	40	3.211E-5	="NA"	301	Infinity			0.5962	Tissue__TCGA-LUSC
34984	Tissue	1	348	3.529E-4	="NA"	301	Infinity			-0.5908	Tissue__TCGA-NORMAL
44686	Tissue	1	498	1.833E-6	="NA"	301	Infinity			-0.5363	Tissue__TCGA-LUAD
64940	Tissue	1	599	9.85E-4	="NA"	302	Infinity			0.8399	Tissue__GTEx_normal
47811	Tissue	1	257	3.529E-4	="NA"	302	Infinity			0.5907	Tissue__TCGA-NORMAL
54647	Tissue	1	634	5.608E-4	="NA"	302	Infinity			0.5974	Tissue__TCGA-LUSC
57620	Tissue	1	239	1.833E-6	="NA"	302	Infinity			0.5362	Tissue__TCGA-LUAD
47888	Tissue	1	340	3.529E-4	="NA"	302	Infinity			-0.5907	Tissue__TCGA-NORMAL
34936	Tissue	1	84	3.211E-5	="NA"	303	Infinity			0.5957	Tissue__TCGA-LUSC
63148	Tissue	1	558	2.592E-4	="NA"	303	Infinity			0.8394	Tissue__GTEx_normal
61196	Tissue	1	314	3.529E-4	="NA"	303	Infinity			-0.5906	Tissue__TCGA-NORMAL
63697	Tissue	1	625	9.85E-4	="NA"	303	Infinity			0.8396	Tissue__GTEx_normal
54127	Tissue	1	597	2.592E-4	="NA"	303	Infinity			0.8394	Tissue__GTEx_normal
52834	Tissue	1	523	1.393E-7	="NA"	303	Infinity			0.5952	Tissue__TCGA-LUSC
52323	Tissue	1	253	3.122E-8	="NA"	303	Infinity			0.5351	Tissue__TCGA-LUAD
38267	Tissue	1	289	3.529E-4	="NA"	304	Infinity			0.5901	Tissue__TCGA-NORMAL
34837	Tissue	2	73	1.439E-4	="NA"	304	Infinity			-0.5956	Tissue__TCGA-LUSC
34836	Tissue	1	433	1.436E-9	="NA"	304	Infinity			0.5939	Tissue__TCGA-LUSC
46232	Tissue	1	100	5.334E-5	="NA"	304	Infinity			0.5356	Tissue__TCGA-LUAD
39908	Tissue	1	392	1.071E-5	="NA"	304	Infinity			-0.5353	Tissue__TCGA-LUAD
54872	Tissue	1	537	2.592E-4	="NA"	304	Infinity			0.8393	Tissue__GTEx_normal
64939	Tissue	2	608	9.85E-4	="NA"	305	Infinity			0.8393	Tissue__GTEx_normal
34835	Tissue	1	382	3.517E-7	="NA"	305	Infinity			0.8381	Tissue__GTEx_normal
34631	Tissue	1	699	8.554E-4	="NA"	305	Infinity			0.5362	Tissue__TCGA-LUAD
49072	Tissue	1	588	9.85E-4	="NA"	305	Infinity			0.8393	Tissue__GTEx_normal
34611	Tissue	1	319	3.529E-4	="NA"	305	Infinity			0.5898	Tissue__TCGA-NORMAL
34609	Tissue	1	731	5.608E-4	="NA"	305	Infinity			0.5957	Tissue__TCGA-LUSC
34600	Tissue	1	325	9.85E-4	="NA"	306	Infinity			0.8387	Tissue__GTEx_normal
49101	Tissue	1	367	1.436E-9	="NA"	306	Infinity			0.5935	Tissue__TCGA-LUSC
55812	Tissue	1	570	2.592E-4	="NA"	306	Infinity			0.8386	Tissue__GTEx_normal
34598	Tissue	1	350	3.529E-4	="NA"	306	Infinity			0.5897	Tissue__TCGA-NORMAL
65312	Tissue	1	502	1.071E-5	="NA"	306	Infinity			-0.5348	Tissue__TCGA-LUAD
53732	Tissue	1	577	8.554E-4	="NA"	307	Infinity			0.5352	Tissue__TCGA-LUAD
53242	Tissue	2	729	5.608E-4	="NA"	307	Infinity			0.5953	Tissue__TCGA-LUSC
49937	Tissue	1	195	1.012E-6	="NA"	307	Infinity			-0.594	Tissue__TCGA-LUSC
34596	Tissue	2	679	1.439E-4	="NA"	307	Infinity			0.5951	Tissue__TCGA-LUSC
47442	Tissue	1	583	2.592E-4	="NA"	307	Infinity			0.8384	Tissue__GTEx_normal
38369	Tissue	1	328	3.529E-4	="NA"	307	Infinity			0.5896	Tissue__TCGA-NORMAL
40961	Tissue	1	405	1.071E-5	="NA"	308	Infinity			-0.5336	Tissue__TCGA-LUAD
61727	Tissue	1	599	2.592E-4	="NA"	308	Infinity			0.8382	Tissue__GTEx_normal
48763	Tissue	1	452	9.85E-4	="NA"	308	Infinity			0.8384	Tissue__GTEx_normal
42278	Tissue	1	550	6.028E-5	="NA"	308	Infinity			0.8381	Tissue__GTEx_normal
34443	Tissue	1	345	3.529E-4	="NA"	308	Infinity			-0.5894	Tissue__TCGA-NORMAL
34438	Tissue	1	414	3.517E-7	="NA"	308	Infinity			0.8378	Tissue__GTEx_normal
50235	Tissue	1	651	1.439E-4	="NA"	308	Infinity			0.5946	Tissue__TCGA-LUSC
54738	Tissue	1	351	3.529E-4	="NA"	309	Infinity			-0.5889	Tissue__TCGA-NORMAL
56683	Tissue	1	637	1.439E-4	="NA"	309	Infinity			0.5942	Tissue__TCGA-LUSC
34420	Tissue	1	108	1.071E-5	="NA"	309	Infinity			0.5335	Tissue__TCGA-LUAD
34419	Tissue	1	55	1.012E-6	="NA"	309	Infinity			0.5935	Tissue__TCGA-LUSC
49071	Tissue	1	594	9.85E-4	="NA"	309	Infinity			0.8381	Tissue__GTEx_normal
64485	Tissue	1	589	2.592E-4	="NA"	309	Infinity			0.838	Tissue__GTEx_normal
64484	Tissue	1	589	9.85E-4	="NA"	309	Infinity			0.8381	Tissue__GTEx_normal
43535	Tissue	1	293	2.965E-9	="NA"	309	Infinity			0.5313	Tissue__TCGA-LUAD
52322	Tissue	1	145	1.833E-6	="NA"	309	Infinity			0.5332	Tissue__TCGA-LUAD
39471	Tissue	1	246	3.529E-4	="NA"	309	Infinity			0.5889	Tissue__TCGA-NORMAL
54895	Tissue	1	97	3.211E-5	="NA"	310	Infinity			-0.5938	Tissue__TCGA-LUSC
62176	Tissue	1	643	9.85E-4	="NA"	310	Infinity			0.838	Tissue__GTEx_normal
59273	Tissue	1	315	3.529E-4	="NA"	310	Infinity			0.5886	Tissue__TCGA-NORMAL
34418	Tissue	1	156	8.554E-4	="NA"	310	Infinity			-0.5341	Tissue__TCGA-LUAD
44685	Tissue	1	556	1.833E-6	="NA"	310	Infinity			-0.5327	Tissue__TCGA-LUAD
47441	Tissue	1	725	5.608E-4	="NA"	310	Infinity			0.5943	Tissue__TCGA-LUSC
40841	Tissue	1	84	1.012E-6	="NA"	311	Infinity			-0.5924	Tissue__TCGA-LUSC
46231	Tissue	1	92	1.833E-6	="NA"	311	Infinity			0.5325	Tissue__TCGA-LUAD
64483	Tissue	1	604	9.85E-4	="NA"	311	Infinity			0.8379	Tissue__GTEx_normal
34413	Tissue	1	318	3.529E-4	="NA"	311	Infinity			0.5885	Tissue__TCGA-NORMAL
38119	Tissue	1	460	1.436E-9	="NA"	311	Infinity			0.5916	Tissue__TCGA-LUSC
43084	Tissue	1	65	1.071E-5	="NA"	312	Infinity			0.5324	Tissue__TCGA-LUAD
58032	Tissue	1	535	6.028E-5	="NA"	312	Infinity			0.8376	Tissue__GTEx_normal
34384	Tissue	1	401	3.517E-7	="NA"	312	Infinity			0.8371	Tissue__GTEx_normal
38248	Tissue	1	319	3.529E-4	="NA"	312	Infinity			0.5879	Tissue__TCGA-NORMAL
47440	Tissue	1	631	9.85E-4	="NA"	312	Infinity			0.8378	Tissue__GTEx_normal
47966	Tissue	1	62	5.094E-12	="NA"	312	Infinity			-0.5912	Tissue__TCGA-LUSC
34367	Tissue	1	86	1.833E-6	="NA"	313	Infinity			0.5309	Tissue__TCGA-LUAD
34366	Tissue	1	355	3.529E-4	="NA"	313	Infinity			-0.5878	Tissue__TCGA-NORMAL
66245	Tissue	1	467	9.85E-4	="NA"	313	Infinity			0.8377	Tissue__GTEx_normal
34361	Tissue	1	651	1.439E-4	="NA"	313	Infinity			0.5932	Tissue__TCGA-LUSC
65311	Tissue	1	588	9.85E-4	="NA"	313	Infinity			0.8377	Tissue__GTEx_normal
34357	Tissue	1	221	3.529E-4	="NA"	313	Infinity			-0.5878	Tissue__TCGA-NORMAL
34344	Tissue	1	52	2.29E-4	="NA"	314	Infinity			-0.5313	Tissue__TCGA-LUAD
48300	Tissue	1	593	5.334E-5	="NA"	314	Infinity			0.5311	Tissue__TCGA-LUAD
59957	Tissue	1	270	6.175E-6	="NA"	314	Infinity			0.5921	Tissue__TCGA-LUSC
66044	Tissue	1	336	3.529E-4	="NA"	314	Infinity			0.5875	Tissue__TCGA-NORMAL
61840	Tissue	1	577	2.592E-4	="NA"	314	Infinity			0.8373	Tissue__GTEx_normal
60585	Tissue	1	570	2.592E-4	="NA"	315	Infinity			0.8372	Tissue__GTEx_normal
61023	Tissue	1	336	3.529E-4	="NA"	315	Infinity			-0.5874	Tissue__TCGA-NORMAL
40960	Tissue	1	435	1.833E-6	="NA"	315	Infinity			-0.5306	Tissue__TCGA-LUAD
44940	Tissue	1	606	1.439E-4	="NA"	315	Infinity			0.5922	Tissue__TCGA-LUSC
58031	Tissue	1	537	6.028E-5	="NA"	315	Infinity			0.8371	Tissue__GTEx_normal
42943	Tissue	2	710	5.608E-4	="NA"	315	Infinity			0.5926	Tissue__TCGA-LUSC
34343	Tissue	1	337	3.529E-4	="NA"	316	Infinity			0.5873	Tissue__TCGA-NORMAL
34339	Tissue	1	342	9.85E-4	="NA"	316	Infinity			0.8371	Tissue__GTEx_normal
49957	Tissue	1	541	1.833E-6	="NA"	316	Infinity			0.5303	Tissue__TCGA-LUAD
34336	Tissue	2	605	1.439E-4	="NA"	316	Infinity			0.5921	Tissue__TCGA-LUSC
59655	Tissue	1	384	1.436E-9	="NA"	316	Infinity			-0.5906	Tissue__TCGA-LUSC
44684	Tissue	1	538	5.334E-5	="NA"	316	Infinity			0.5308	Tissue__TCGA-LUAD
44683	Tissue	1	579	2.592E-4	="NA"	316	Infinity			0.837	Tissue__GTEx_normal
34331	Tissue	1	57	3.211E-5	="NA"	316	Infinity			0.5916	Tissue__TCGA-LUSC
63147	Tissue	1	616	9.85E-4	="NA"	317	Infinity			0.837	Tissue__GTEx_normal
34327	Tissue	1	474	1.833E-6	="NA"	317	Infinity			0.5301	Tissue__TCGA-LUAD
40959	Tissue	1	276	2.635E-7	="NA"	317	Infinity			0.5297	Tissue__TCGA-LUAD
65729	Tissue	1	231	9.85E-4	="NA"	317	Infinity			0.837	Tissue__GTEx_normal
56126	Tissue	1	256	3.529E-4	="NA"	317	Infinity			-0.5872	Tissue__TCGA-NORMAL
58030	Tissue	1	576	2.592E-4	="NA"	317	Infinity			0.8369	Tissue__GTEx_normal
33955	Tissue	1	629	1.439E-4	="NA"	317	Infinity			0.5919	Tissue__TCGA-LUSC
37596	Tissue	1	182	1.833E-6	="NA"	317	Infinity			-0.5301	Tissue__TCGA-LUAD
44982	Tissue	1	332	3.529E-4	="NA"	318	Infinity			0.5868	Tissue__TCGA-NORMAL
33932	Tissue	1	467	1.071E-5	="NA"	318	Infinity			0.5297	Tissue__TCGA-LUAD
45672	Tissue	1	619	1.439E-4	="NA"	318	Infinity			0.5914	Tissue__TCGA-LUSC
55811	Tissue	1	545	2.592E-4	="NA"	318	Infinity			0.8367	Tissue__GTEx_normal
41561	Tissue	1	601	2.592E-4	="NA"	318	Infinity			0.8367	Tissue__GTEx_normal
54295	Tissue	1	350	3.529E-4	="NA"	319	Infinity			0.5865	Tissue__TCGA-NORMAL
[truncated: 56,420 more rows]
