# Supplementary material
Source: publisher figshare collection journal article supplement (https://springernature.figshare.com/ndownloader/files/35041376)
Supplement: Supplementary file 1 [file 35041376 › CytoscapeSession-2021_06_28-02_05/tables/103-lung_rmMT.paf%2Dth0.00%2Dp1e%2D3%2Drsqr0.30%2Dfiltered%2Dth_ranked.Tissue%2Dunique_class.csGCN.txt/HIDDEN-org.cytoscape.model.CyNetwork-103+hidden+network.cytable]

"CyCSV-Version","1"
"SUID"
"java.lang.Long"
""
"103 hidden network",""
"103"
