# Supplementary material
Source: publisher figshare collection journal article supplement (https://springernature.figshare.com/ndownloader/files/35041376)
Supplement: Supplementary file 1 [file 35041376 › CytoscapeSession-2021_06_28-02_05/tables/103-lung_rmMT.paf%2Dth0.00%2Dp1e%2D3%2Drsqr0.30%2Dfiltered%2Dth_ranked.Tissue%2Dunique_class.csGCN.txt/LOCAL_ATTRS-org.cytoscape.model.CyEdge-103+default+edge.cytable]

CyCSV-Version	1
SUID	interaction	name	selected
java.lang.Long	java.lang.String	java.lang.String	java.lang.Boolean
103 default edge
7981	co	BEX4 (co) CDC6	false
7982	co	AKIRIN2 (co) GINS1	false
7983	co	CEACAM4 (co) PDE1C	false
7984	co	THOC6 (co) LGR4	false
7985	co	NARS (co) PSAT1	false
7986	co	PRKRIP1 (co) ADCY4	false
7987	co	WDR24 (co) C16orf59	false
7988	co	PIDD (co) PNPLA6	false
7989	co	U2AF1 (co) CASKIN2	false
7990	co	MALSU1 (co) FHL1	false
7991	co	SMIM15 (co) CDC6	false
7992	co	SERHL2 (co) GSTM5	false
7993	co	APOOL (co) WWC2	false
7994	co	RFWD2 (co) CCNA2	false
7995	co	IRX5 (co) HSD17B6	false
7996	co	CSNK1D (co) PRKCE	false
7997	co	FAM19A4 (co) RPL24	false
7998	co	POLR3A (co) CDCA8	false
7999	co	CYP3A5 (co) EDNRB	false
8000	co	CYP3A5 (co) ARHGAP6	false
8001	co	NCDN (co) PYCR1	false
8002	co	RNF146 (co) CDC6	false
8003	co	MAP1LC3A (co) FXYD1	false
8004	co	C5orf54 (co) CCNA2	false
8005	co	MYH9 (co) GRK5	false
8006	co	FAM168B (co) ARHGAP31	false
8007	co	PIN1 (co) RNASEH2A	false
8008	co	SRSF2 (co) EZH2	false
8009	co	SPG21 (co) NME1	false
8010	co	STARD4 (co) CHEK1	false
8011	co	DCAF15 (co) PNPLA6	false
8012	co	FNTB (co) GINS1	false
8013	co	RUSC2 (co) CDC20	false
8014	co	NTM (co) CD34	false
8015	co	COL14A1 (co) TNXB	false
8016	co	GARNL3 (co) TNXB	false
8017	co	N4BP2 (co) GNAQ	false
8018	co	RGL1 (co) LRP2BP	false
8019	co	ZNF25 (co) CDC6	false
8020	co	ZNF529 (co) RCC1	false
8021	co	PAAF1 (co) GINS1	false
8022	co	PCOLCE (co) PLAC9	false
8023	co	CLMP (co) ACVRL1	false
8024	co	APOBEC3D (co) ARHGEF15	false
8025	co	TRIM2 (co) CD34	false
8026	co	RAB10 (co) CDC6	false
8027	co	NINL (co) SYT15	false
8028	co	CCL5 (co) JAM2	false
8029	co	TAF5L (co) CAT	false
8030	co	PMS2 (co) NCAPG2	false
8031	co	APLN (co) SYNJ2	false
8032	co	FMN1 (co) COX4I2	false
8033	co	CREB1 (co) PEAK1	false
8034	co	FAM122C (co) CLEC1A	false
8035	co	NKD2 (co) CAT	false
8036	co	DDB1 (co) STIL	false
8037	co	POLL (co) TONSL	false
8038	co	ANKRD12 (co) RALGPS2	false
8039	co	ABCG2 (co) NEK2	false
8040	co	SLC20A1 (co) LRRC32	false
8041	co	TBL3 (co) LGR4	false
8042	co	MRPS21 (co) GINS2	false
8043	co	WBP2 (co) GINS1	false
8044	co	RPLP2 (co) RPL29	false
8045	co	NNT (co) GINS1	false
8046	co	ZNF785 (co) CCNA2	false
8047	co	TNNI2 (co) CDC6	false
8048	co	C17orf59 (co) TONSL	false
8049	co	ACSL1 (co) SRPK1	false
8050	co	CHRNB2 (co) PABPC1	false
8051	co	KLHDC2 (co) CALCOCO1	false
8052	co	TMUB2 (co) DPEP2	false
8053	co	FKBP8 (co) KANK3	false
8054	co	AKTIP (co) PNPLA6	false
8055	co	PDE7B (co) TNXB	false
8056	co	RAB26 (co) DEPDC1	false
8057	co	ADNP2 (co) LRRC32	false
8058	co	KCND1 (co) PEAR1	false
8059	co	TRAP1 (co) FOXM1	false
8060	co	TRAP1 (co) MCM4	false
8061	co	TRAP1 (co) NEK2	false
8062	co	TRAP1 (co) CDC6	false
8063	co	TRAP1 (co) BUB1B	false
8064	co	LSM2 (co) CCNA2	false
8065	co	MICU1 (co) TNXB	false
8066	co	SPNS2 (co) STIL	false
8067	co	CTC-479C5.12 (co) TIE1	false
8068	co	CTC-479C5.12 (co) PNPLA6	false
8069	co	TFB1M (co) GINS1	false
8070	co	DCUN1D1 (co) OSBPL11	false
8071	co	ZNF33A (co) STIL	false
8072	co	CRK (co) PNPLA6	false
8073	co	CRK (co) ADAMTSL4	false
8074	co	TBCEL (co) CCNA2	false
8075	co	CAPG (co) PEAK1	false
8076	co	AIG1 (co) PLAC9	false
8077	co	FTO (co) NLRC4	false
8078	co	PSMA7 (co) PPP1R14B	false
8079	co	PSMA7 (co) NME1	false
8080	co	PLA2G4C (co) RAMP2	false
8081	co	PCNP (co) PEAK1	false
8082	co	RP11-192H23.4 (co) PNPLA6	false
8083	co	RP11-192H23.4 (co) SPAG5	false
8084	co	ELL3 (co) NEK2	false
8085	co	NT5DC3 (co) TNS1	false
8086	co	GNS (co) PLAC9	false
8087	co	ERLIN1 (co) HIGD1B	false
8088	co	SHISA5 (co) SECISBP2L	false
8089	co	FAAH2 (co) STIL	false
8090	co	PAG1 (co) SRPK1	false
8091	co	HDAC11 (co) HSPA12B	false
8092	co	F3 (co) TIE1	false
8093	co	CNIH1 (co) PAICS	false
8094	co	CNIH1 (co) CCT3	false
8095	co	CNIH1 (co) PYCR1	false
8096	co	PIGP (co) ERG	false
8097	co	DCLRE1B (co) NLRC4	false
8098	co	ATL2 (co) GNAQ	false
8099	co	DTNA (co) FHL1	false
8100	co	WDR43 (co) PAICS	false
8101	co	FES (co) ADRB2	false
8102	co	LETM1 (co) LGR4	false
8103	co	ZNF821 (co) PEAR1	false
8104	co	SDC2 (co) STIL	false
8105	co	RTEL1-TNFRSF6B (co) SPAG5	false
8106	co	SMAD4 (co) SPTBN1	false
8107	co	FAM132B (co) MASP1	false
8108	co	BLVRA (co) TENC1	false
8109	co	TMEM131 (co) PSMG3	false
8110	co	CDKN1A (co) CAT	false
8111	co	SLC35B3 (co) CENPK	false
8112	co	SNX22 (co) AMN	false
8113	co	ZCCHC9 (co) NLRC4	false
8114	co	ATP5C1 (co) ZWINT	false
8115	co	FCHSD2 (co) CDH5	false
8116	co	BMPER (co) SGOL1	false
8117	co	USP15 (co) CLEC1A	false
8118	co	BRPF3 (co) KIF1C	false
8119	co	CSK (co) PNPLA6	false
8120	co	CCDC102A (co) EFCC1	false
8121	co	GNAI1 (co) EFCC1	false
8122	co	EDN1 (co) GINS1	false
8123	co	FRZB (co) FHL1	false
8124	co	GPS1 (co) ERO1L	false
8125	co	ZNF75D (co) STX11	false
8126	co	UBOX5 (co) CCNA2	false
8127	co	NDUFA10 (co) STIL	false
8128	co	TMEM19 (co) ADPRH	false
8129	co	TMEM19 (co) CACNA2D2	false
8130	co	KCNIP2 (co) PNPLA6	false
8131	co	PPP4C (co) CDC20	false
8132	co	PPP4C (co) UBE2C	false
8133	co	PNPLA7 (co) KAT2A	false
8134	co	C1orf174 (co) KDM5B	false
8135	co	ITIH3 (co) AOC3	false
8136	co	APBA2 (co) GYPC	false
8137	co	TSPAN17 (co) SAPCD2	false
8138	co	TSPAN17 (co) GINS1	false
8139	co	GOLPH3 (co) GNAQ	false
8140	co	C9orf3 (co) PLAC9	false
8141	co	TPST1 (co) TUBB3	false
8142	co	FAM187A (co) EPN3	false
8143	co	POLRMT (co) PNPLA6	false
8144	co	PDP2 (co) LAMP3	false
8145	co	UBE2Q1 (co) KIF1C	false
8146	co	STRADA (co) ARHGEF39	false
8147	co	NOXA1 (co) DPEP2	false
8148	co	ZNF598 (co) CTIF	false
8149	co	ZNF598 (co) ZBTB47	false
8150	co	METTL8 (co) CDC6	false
8151	co	RNF7 (co) CSRNP1	false
8152	co	NMD3 (co) SERINC1	false
8153	co	COA3 (co) PAFAH1B3	false
8154	co	MLPH (co) DEPDC1B	false
8155	co	IL15 (co) SAPCD2	false
8156	co	FAM53A (co) CHEK1	false
8157	co	ZBED4 (co) CDC6	false
8158	co	EHMT1 (co) CLEC1A	false
8159	co	ZNF521 (co) NLRC4	false
8160	co	SNX4 (co) PNPLA6	false
8161	co	RDH11 (co) KANK3	false
8162	co	RAB3D (co) KIF1C	false
8163	co	ZNF469 (co) SAPCD2	false
8164	co	ZFP36L1 (co) LAMP3	false
8165	co	PDGFD (co) CTHRC1	false
8166	co	SLC6A20 (co) CASP12	false
8167	co	C1orf27 (co) CCNA2	false
8168	co	GLDN (co) FAM162B	false
8169	co	LIPA (co) DOCK4	false
8170	co	LIPA (co) LRRC32	false
8171	co	RSG1 (co) SAPCD2	false
8172	co	RSG1 (co) TIMELESS	false
8173	co	CD83 (co) C14orf132	false
8174	co	BMS1 (co) PAICS	false
8175	co	DLEU1 (co) CDC6	false
8176	co	LYAR (co) PPAT	false
8177	co	ANXA13 (co) GP9	false
8178	co	MTRF1 (co) CCNB1	false
8179	co	P2RX5 (co) SELPLG	false
8180	co	VASH1 (co) KAT2A	false
8181	co	VASH1 (co) TTYH3	false
8182	co	VASH1 (co) ADRB2	false
8183	co	TP53BP1 (co) CCNA2	false
8184	co	TP53BP1 (co) SLC25A10	false
8185	co	STK3 (co) CLEC1A	false
8186	co	STK3 (co) SLC25A10	false
8187	co	NEDD4L (co) MFNG	false
8188	co	ZNF354B (co) EZH2	false
8189	co	ZFAND5 (co) CSRNP1	false
8190	co	CXXC1 (co) PNPLA6	false
8191	co	ANGPTL5 (co) SERTM1	false
8192	co	ANKRD36 (co) RCC1	false
8193	co	UBA7 (co) USHBP1	false
8194	co	KLHL41 (co) ACADL	false
8195	co	SMC3 (co) CAT	false
8196	co	TFAM (co) NLRC4	false
8197	co	AGGF1 (co) SAPCD2	false
8198	co	PKNOX1 (co) LRRC32	false
8199	co	TMIE (co) XRCC2	false
8200	co	APOO (co) NME1	false
8201	co	C16orf95 (co) CDC20	false
8202	co	COL5A3 (co) GSTM5	false
8203	co	MTHFSD (co) SRPK1	false
8204	co	ZNF587B (co) CHAF1B	false
8205	co	PKLR (co) G6PC2	false
8206	co	LRRC43 (co) NGEF	false
8207	co	TLK1 (co) GNAQ	false
8208	co	NRAP (co) RPS10	false
8209	co	CTAGE5 (co) PSAT1	false
8210	co	SSH3 (co) PAICS	false
8211	co	SETMAR (co) SRPK1	false
8212	co	ELF3 (co) STX11	false
8213	co	SNAPIN (co) SRPK1	false
8214	co	IGF1 (co) PYCR1	false
8215	co	C11orf80 (co) CCNA2	false
8216	co	CAPN12 (co) PHF6	false
8217	co	AL591479.1 (co) SRPK1	false
8218	co	FAM212B (co) CCNA2	false
8219	co	TCHP (co) PNPLA6	false
8220	co	NADK (co) FGR	false
8221	co	TFCP2 (co) SPAG4	false
8222	co	CDK11A (co) STARD9	false
8223	co	CDK11A (co) CAT	false
8224	co	SYP (co) NEK2	false
8225	co	SRP19 (co) CDC6	false
8226	co	UPRT (co) TNXB	false
8227	co	ORMDL3 (co) MGAT3	false
8228	co	SUPT5H (co) PNPLA6	false
8229	co	AKAP8L (co) ARHGEF39	false
8230	co	AKAP8L (co) TIE1	false
8231	co	ZFP62 (co) CCNA2	false
8232	co	ADCY6 (co) TNXB	false
8233	co	PNPLA4 (co) ERG	false
8234	co	YIPF6 (co) CHTF18	false
8235	co	YIPF6 (co) CFL2	false
8236	co	YIPF6 (co) CDC6	false
8237	co	KSR2 (co) CCDC141	false
8238	co	ZBTB46 (co) FGD5	false
8239	co	ZBTB46 (co) CDH5	false
8240	co	GIPC2 (co) DEPDC1B	false
8241	co	GALNT1 (co) CDC6	false
8242	co	KLHL33 (co) CAV3	false
8243	co	KLHL33 (co) OTC	false
8244	co	NDN (co) STX11	false
8245	co	TTC30B (co) IGSF9	false
8246	co	GAB2 (co) CCNA2	false
8247	co	SEPP1 (co) C1QTNF7	false
8248	co	C4orf21 (co) STARD9	false
8249	co	HSPA13 (co) PAICS	false
8250	co	ARHGAP9 (co) TRPV2	false
8251	co	TIPARP (co) CSRNP1	false
8252	co	C8orf76 (co) CCNA2	false
8253	co	POLR2J (co) CHEK1	false
8254	co	POLR2J (co) KDM5B	false
8255	co	POLR2J (co) PAFAH1B3	false
8256	co	PASK (co) DOCK4	false
8257	co	PASK (co) SPAG5	false
8258	co	RIMS3 (co) PEAR1	false
8259	co	CNFN (co) NEK2	false
8260	co	JPH2 (co) GINS1	false
8261	co	HELB (co) SLC25A10	false
8262	co	KCNA6 (co) RPL29	false
8263	co	BNIP2 (co) CCNA2	false
8264	co	HDAC8 (co) TNXB	false
8265	co	FGF13 (co) DENND2A	false
8266	co	TNFAIP2 (co) PNPLA6	false
8267	co	TRAPPC3 (co) TNXB	false
8268	co	PDCL3 (co) CDC6	false
8269	co	SEPT5 (co) PLAC9	false
8270	co	IDS (co) PYCR1	false
8271	co	IDS (co) PTPRB	false
8272	co	IDS (co) FHL1	false
8273	co	RPAP2 (co) CCNA2	false
8274	co	RP11-345J4.5 (co) GINS1	false
8275	co	UAP1L1 (co) ERG	false
8276	co	UAP1L1 (co) AKAP2	false
8277	co	ANKRD45 (co) OTX1	false
8278	co	HMGN3 (co) PRKCE	false
8279	co	ADAMTS1 (co) NDE1	false
8280	co	ADAMTS1 (co) CSRNP1	false
8281	co	ALDH2 (co) KPNA2	false
8282	co	CCT6A (co) SOX15	false
8283	co	KIAA1324 (co) IGSF9	false
8284	co	RAB40A (co) DEPDC1	false
8285	co	MRPL47 (co) NME1	false
8286	co	THOC3 (co) AURKA	false
8287	co	THOC3 (co) GINS1	false
8288	co	THOC3 (co) SAPCD2	false
8289	co	DHFRL1 (co) CLEC1A	false
8290	co	KCNH2 (co) C1orf198	false
8291	co	SMG5 (co) HSD17B6	false
8292	co	SMG5 (co) DOCK4	false
8293	co	SEPT7 (co) FHL1	false
8294	co	SEPT7 (co) BMPR2	false
8295	co	SEPT7 (co) GNG11	false
8296	co	EMID1 (co) PLAC9	false
8297	co	TVP23A (co) PLAC9	false
8298	co	TVP23A (co) TNXB	false
8299	co	LGALS1 (co) CCDC141	false
8300	co	DNM1 (co) TNXB	false
8301	co	ZDHHC24 (co) SAPCD2	false
8302	co	CRYBG3 (co) TNXB	false
8303	co	RGS14 (co) CCNA2	false
8304	co	PPP1R26 (co) MGAT3	false
8305	co	ATP6V1H (co) ERG	false
8306	co	BOLA2 (co) SAPCD2	false
8307	co	C7orf50 (co) AKAP2	false
8308	co	YY1 (co) FERMT2	false
8309	co	CYB5R4 (co) TNXB	false
8310	co	PLA2G6 (co) SRPK1	false
8311	co	NKRF (co) PTTG1	false
8312	co	NKRF (co) ERO1L	false
8313	co	IFT140 (co) SLC25A10	false
8314	co	CDAN1 (co) CCNA2	false
8315	co	ST6GALNAC1 (co) IGSF9	false
8316	co	GFM2 (co) STIL	false
8317	co	HK2 (co) PHACTR1	false
8318	co	SHISA2 (co) SUSD2	false
8319	co	LPGAT1 (co) NEK7	false
8320	co	LPGAT1 (co) ZEB2	false
8321	co	HEXB (co) PEAK1	false
8322	co	HEXB (co) TIE1	false
8323	co	HEXB (co) PEAR1	false
8324	co	PRRC2A (co) DOCK4	false
8325	co	PRRC2A (co) LRRC32	false
8326	co	PTX4 (co) EEF1G	false
8327	co	PLXNB2 (co) PNPLA6	false
8328	co	HLX (co) ARHGEF15	false
8329	co	CLCN7 (co) PNPLA6	false
8330	co	KRT80 (co) CDC6	false
8331	co	RHOT1 (co) HSD17B6	false
8332	co	RHOT1 (co) SYT15	false
8333	co	CCNI (co) SPTBN1	false
8334	co	BAI2 (co) NEK2	false
8335	co	BAI2 (co) CORO2B	false
8336	co	EMC1 (co) NME1	false
8337	co	THRAP3 (co) KDM5B	false
8338	co	CCDC115 (co) SRPK1	false
8339	co	ACTR8 (co) TIMELESS	false
8340	co	REEP6 (co) NEK2	false
8341	co	REEP6 (co) CLEC1A	false
8342	co	REEP6 (co) SPATS2	false
8343	co	STX7 (co) RAPGEF4	false
8344	co	SAMD3 (co) GNG11	false
8345	co	MORF4L1 (co) SERINC1	false
8346	co	CXorf57 (co) KIF2C	false
8347	co	KLHL29 (co) CCNA2	false
8348	co	ERCC6L (co) CCDC85A	false
8349	co	PECR (co) LRRC32	false
8350	co	GYG1 (co) PAICS	false
8351	co	OASL (co) GINS1	false
8352	co	OASL (co) STIL	false
8353	co	NTSR1 (co) PABPC1	false
8354	co	TMEM68 (co) CAT	false
8355	co	TMEM68 (co) DONSON	false
8356	co	CLIC6 (co) IGSF9	false
8357	co	NT5C2 (co) PAFAH1B3	false
8358	co	MPHOSPH10 (co) ADRB2	false
8359	co	TSPAN6 (co) ATAD3A	false
8360	co	TSPAN6 (co) BZW2	false
8361	co	TSPAN6 (co) NEK2	false
8362	co	SPOPL (co) PEAK1	false
8363	co	NAGA (co) HN1	false
8364	co	RHBDL1 (co) NEK2	false
8365	co	TNFRSF11A (co) SAPCD2	false
8366	co	TNFRSF11A (co) GINS1	false
8367	co	LYSMD4 (co) ECT2	false
8368	co	MAP3K1 (co) LMO2	false
8369	co	ARID4A (co) NME1	false
8370	co	CDK5RAP1 (co) PNPLA6	false
8371	co	ZCCHC11 (co) ARHGEF39	false
8372	co	ZCCHC11 (co) TIE1	false
8373	co	ZCCHC11 (co) PEAR1	false
8374	co	CA11 (co) FXYD1	false
8375	co	RNF213 (co) PNPLA6	false
8376	co	ANTXR2 (co) ABCA8	false
8377	co	DEPDC7 (co) FAM162B	false
8378	co	FKBP1B (co) MCM4	false
8379	co	DUSP28 (co) DPEP2	false
8380	co	GREB1 (co) PBK	false
8381	co	CARD8 (co) INTS8	false
8382	co	MZT2B (co) CCNA2	false
8383	co	TMEM252 (co) SERTM1	false
8384	co	AASS (co) FAM107A	false
8385	co	FBXW4 (co) NCAPG	false
8386	co	ACADVL (co) PNPLA6	false
8387	co	ADAT1 (co) GINS1	false
8388	co	ADAT1 (co) STIL	false
8389	co	ADAT1 (co) SAPCD2	false
8390	co	CTSL (co) ADM2	false
8391	co	RNASEH1 (co) CDC6	false
8392	co	PDGFB (co) ROBO4	false
8393	co	FRAS1 (co) PLAC9	false
8394	co	FRAS1 (co) FHL1	false
8395	co	C1orf122 (co) PPP1R14B	false
8396	co	ZNF774 (co) GINS1	false
8397	co	FAM89A (co) STIL	false
8398	co	ARMCX5 (co) KIF11	false
8399	co	ARMCX5 (co) GINS1	false
8400	co	FNIP2 (co) LAMP3	false
8401	co	EXT1 (co) ERG	false
8402	co	TMEM255B (co) CAT	false
8403	co	NFYA (co) LRRC32	false
8404	co	BMP4 (co) ARHGEF15	false
8405	co	ENOPH1 (co) CDC6	false
8406	co	UBE2L3 (co) PAICS	false
8407	co	UBE2L3 (co) PEAR1	false
8408	co	OGT (co) PEAK1	false
8409	co	TAF6L (co) C16orf59	false
8410	co	TAF6L (co) SAPCD2	false
8411	co	SEPT9 (co) TIE1	false
8412	co	SEPT9 (co) PNPLA6	false
8413	co	TTC33 (co) CDH5	false
8414	co	MTFR1L (co) STX11	false
8415	co	PCDHAC1 (co) CASP12	false
8416	co	PIK3R1 (co) CDKN3	false
8417	co	PIK3R1 (co) PTTG1	false
8418	co	RBM39 (co) RCC1	false
8419	co	EFTUD2 (co) MYBL2	false
8420	co	EFTUD2 (co) CDC6	false
8421	co	EFTUD2 (co) FXYD1	false
8422	co	PRR19 (co) GINS1	false
8423	co	PRR19 (co) SAPCD2	false
8424	co	HCAR2 (co) CHAF1B	false
8425	co	HCAR2 (co) STIL	false
8426	co	IVD (co) SLC25A10	false
8427	co	IVD (co) LRRC32	false
8428	co	MYSM1 (co) PAFAH1B3	false
8429	co	SLC35A2 (co) FHL1	false
8430	co	SLC35A2 (co) SPTBN2	false
8431	co	C19orf53 (co) PPP1R14B	false
8432	co	PIAS3 (co) TENC1	false
8433	co	HDAC4 (co) SRPK1	false
8434	co	HDAC4 (co) CAT	false
8435	co	EPB41L4B (co) LAMP3	false
8436	co	SLC37A3 (co) LRRC32	false
8437	co	ADCK1 (co) SAPCD2	false
8438	co	MIEF2 (co) SLC25A10	false
8439	co	RARA (co) SYNJ2	false
8440	co	RARA (co) RASIP1	false
8441	co	RARA (co) ESAM	false
8442	co	GLYCTK (co) C16orf59	false
8443	co	TMEM220 (co) LRRC32	false
8444	co	TMEM220 (co) RAPGEF4	false
8445	co	CASC4 (co) LGR4	false
8446	co	DCAF17 (co) CCNA2	false
8447	co	CDC42EP2 (co) KIF11	false
8448	co	NT5DC1 (co) SYT15	false
8449	co	NT5DC1 (co) TNXB	false
8450	co	CYP2U1 (co) CCM2L	false
8451	co	SLC35F5 (co) CCNA2	false
8452	co	ZDHHC5 (co) CDC6	false
8453	co	ZDHHC5 (co) DONSON	false
8454	co	SLC43A3 (co) RCC1	false
8455	co	FUOM (co) PEAK1	false
8456	co	FUOM (co) SLC25A39	false
8457	co	FUOM (co) SASH1	false
8458	co	LGMN (co) RCC1	false
8459	co	HARS2 (co) CCNA2	false
8460	co	FBXO44 (co) PNPLA6	false
8461	co	UBE3C (co) PAICS	false
8462	co	SOX18 (co) SMAD6	false
8463	co	DNAH7 (co) NGEF	false
8464	co	CTBP2 (co) CDH5	false
8465	co	RBCK1 (co) PNPLA6	false
8466	co	AGO3 (co) CLEC1A	false
8467	co	AGO3 (co) LRRC32	false
8468	co	AKAP17A (co) EZH2	false
8469	co	HNRNPH1 (co) STARD9	false
8470	co	POLM (co) PNPLA6	false
8471	co	ATP2C2 (co) SLC25A10	false
8472	co	TRMT2A (co) ERO1L	false
8473	co	TRMT2A (co) C16orf59	false
8474	co	IRS1 (co) MMRN2	false
8475	co	IRS1 (co) TIE1	false
8476	co	IRS1 (co) LHFP	false
8477	co	IRS1 (co) PEAK1	false
8478	co	IRS1 (co) STARD13	false
8479	co	MPC2 (co) MAD2L1	false
8480	co	TMEM88 (co) BUB1B	false
8481	co	ATP6V1E1 (co) TNXB	false
8482	co	CS (co) CCM2L	false
8483	co	ANKS6 (co) PSAT1	false
8484	co	UNK (co) SRPK1	false
8485	co	HSPB11 (co) NEK2	false
8486	co	ADAP2 (co) EFNA4	false
8487	co	ADAP2 (co) POC1A	false
8488	co	USP2 (co) SIX4	false
8489	co	TNRC18 (co) TNS1	false
8490	co	C12orf5 (co) NME1	false
8491	co	TNFAIP6 (co) LRRC32	false
8492	co	CLEC4M (co) COL25A1	false
8493	co	BROX (co) CAT	false
8494	co	BROX (co) GNAQ	false
8495	co	SRP68 (co) CCT3	false
8496	co	RQCD1 (co) MGAT3	false
8497	co	PCDHB7 (co) CAT	false
8498	co	PCDHB7 (co) SYNJ2	false
8499	co	PCDHB7 (co) PLAC9	false
8500	co	DDX17 (co) SPTBN1	false
8501	co	HLTF (co) STIL	false
8502	co	ARMC10 (co) CCNA2	false
8503	co	GLA (co) RAI2	false
8504	co	GLA (co) EZH2	false
8505	co	TMEM35 (co) CLEC3B	false
8506	co	CCDC142 (co) NLRC4	false
8507	co	MR1 (co) SPTBN1	false
8508	co	SKIV2L (co) CCNA2	false
8509	co	CINP (co) FHL1	false
8510	co	CINP (co) SAPCD2	false
8511	co	SPATA24 (co) IGSF9	false
8512	co	SEC24C (co) FXYD1	false
8513	co	BCOR (co) BMPR2	false
8514	co	TK2 (co) CCM2L	false
8515	co	TMEM161A (co) ERG	false
8516	co	TMEM161A (co) TONSL	false
8517	co	TMEM62 (co) AURKB	false
8518	co	FBXO3 (co) PPP1R14B	false
8519	co	ZC3H12B (co) DEPDC1	false
8520	co	EPB41 (co) PLAC9	false
8521	co	DUS2 (co) PKMYT1	false
8522	co	DUS2 (co) CDC20	false
8523	co	DUS2 (co) UBE2C	false
8524	co	SLC18B1 (co) ESAM	false
8525	co	SLC18B1 (co) STIL	false
8526	co	ZNF75A (co) SYT15	false
8527	co	WFDC1 (co) COX4I2	false
8528	co	WDR27 (co) STARD9	false
8529	co	TNFRSF10A (co) STX11	false
8530	co	DNAJC4 (co) DLC1	false
8531	co	DNAJC4 (co) DPEP2	false
8532	co	DNAJC4 (co) KNTC1	false
8533	co	TRIM44 (co) COX4I2	false
8534	co	FAM222A (co) PRKCE	false
8535	co	C12orf68 (co) LRRC46	false
8536	co	MAPK6 (co) SRPK1	false
8537	co	MAPK6 (co) CCM2L	false
8538	co	TAF9 (co) PAICS	false
8539	co	MANSC1 (co) LAMP3	false
8540	co	TTC4 (co) NME1	false
8541	co	GPRASP2 (co) LGR4	false
8542	co	GPRASP2 (co) CYYR1	false
8543	co	HCFC1R1 (co) PLAC9	false
8544	co	FAM110D (co) CPLX1	false
8545	co	FAM110D (co) BUB1B	false
8546	co	FAM110D (co) NEK2	false
8547	co	FAM110D (co) TEAD2	false
8548	co	FAM110D (co) KIF11	false
8549	co	FAM110D (co) PPFIA3	false
8550	co	SCAMP5 (co) GINS1	false
8551	co	SCAMP5 (co) MCM4	false
8552	co	SCAMP5 (co) FOXM1	false
8553	co	SCAMP5 (co) CDC20	false
8554	co	SCAMP5 (co) HELLS	false
8555	co	SCAMP5 (co) NEK2	false
8556	co	SCAMP5 (co) C16orf59	false
8557	co	SCAMP5 (co) STIL	false
8558	co	CCNL1 (co) TIA1	false
8559	co	IRS2 (co) FAM46B	false
8560	co	METTL22 (co) ARHGEF39	false
8561	co	UBE2O (co) CDC6	false
8562	co	SMNDC1 (co) SLC25A10	false
8563	co	MECP2 (co) KDM5B	false
8564	co	HEPH (co) ITGA11	false
8565	co	ZNF83 (co) FXYD1	false
8566	co	DCP2 (co) ARHGEF39	false
8567	co	CLK2 (co) ERO1L	false
8568	co	POLR1A (co) LGR4	false
8569	co	POLR1A (co) NME1	false
8570	co	MCOLN3 (co) TNXB	false
8571	co	MCOLN3 (co) FHL1	false
8572	co	AMACR (co) CAT	false
8573	co	NAMPTL (co) SRPK1	false
8574	co	LRCH4 (co) PNPLA6	false
8575	co	C14orf142 (co) PEAR1	false
8576	co	HSH2D (co) ARHGEF39	false
8577	co	EBLN2 (co) TMEM177	false
8578	co	METTL18 (co) TIMELESS	false
8579	co	METTL18 (co) GINS1	false
8580	co	METTL18 (co) CCNB1	false
8581	co	METTL18 (co) NLRC4	false
8582	co	METTL18 (co) CHEK1	false
8583	co	ARVCF (co) EFCC1	false
8584	co	MTMR3 (co) PEAK1	false
8585	co	MRPS6 (co) CCNA2	false
8586	co	TNPO3 (co) KIF1C	false
8587	co	C1orf204 (co) RCC1	false
8588	co	ATP13A1 (co) PNPLA6	false
8589	co	ATP13A1 (co) FOXM1	false
8590	co	PCDHGA4 (co) ESAM	false
8591	co	PCDHGA4 (co) CDH5	false
8592	co	PCDHGA4 (co) ITGA8	false
8593	co	PCDHGA4 (co) FHL1	false
8594	co	ZNF79 (co) PSAT1	false
8595	co	MTHFD1 (co) CDH5	false
8596	co	MTHFD1 (co) JAM2	false
8597	co	PCTP (co) ACVRL1	false
8598	co	MAFK (co) CDH5	false
8599	co	MAFK (co) RASIP1	false
8600	co	MAFK (co) SAPCD2	false
8601	co	MT1M (co) C17orf96	false
8602	co	MT1M (co) SLC7A5	false
8603	co	NR4A3 (co) CDCA8	false
8604	co	PPIC (co) PPP1R14B	false
8605	co	PPIC (co) PYCR1	false
8606	co	SCCPDH (co) MAD2L1	false
8607	co	USP3 (co) PRC1	false
8608	co	SIKE1 (co) CDC6	false
8609	co	ZNF548 (co) PEAK1	false
8610	co	ABCC4 (co) LAMP3	false
8611	co	FAM20B (co) ERG	false
8612	co	AC106876.2 (co) RPS10	false
8613	co	MROH6 (co) PNPLA6	false
8614	co	BTN3A1 (co) LGR4	false
8615	co	BTN3A1 (co) RAMP2	false
8616	co	MBP (co) CCNA2	false
8617	co	TFG (co) CDC6	false
8618	co	SATB1 (co) KDM5B	false
8619	co	ALDH1L2 (co) PYCR1	false
8620	co	IL6R (co) STX11	false
8621	co	TNFAIP8L3 (co) PAICS	false
8622	co	TNFAIP8L3 (co) DPEP2	false
8623	co	ISOC1 (co) PEAR1	false
8624	co	ASB16 (co) SAPCD2	false
8625	co	LSM10 (co) NME1	false
8626	co	CTSK (co) ECM2	false
8627	co	R3HDM2 (co) KPNA2	false
8628	co	PPIB (co) DEPDC1	false
8629	co	ANKRD13B (co) SLC39A8	false
8630	co	ANKRD13B (co) TNXB	false
8631	co	ZBED2 (co) HJURP	false
8632	co	STON1 (co) STIL	false
8633	co	STON1 (co) NEK2	false
8634	co	STON1 (co) FBLN5	false
8635	co	STON1 (co) CDC20	false
8636	co	STON1 (co) CCNB1	false
8637	co	STON1 (co) GINS1	false
8638	co	PLOD1 (co) CDC6	false
8639	co	LRPPRC (co) CDH5	false
8640	co	LRPPRC (co) RUSC1	false
8641	co	DLD (co) TNXB	false
8642	co	KANSL1L (co) RCC1	false
8643	co	KANSL1L (co) NME1	false
8644	co	KANSL1L (co) PPP1R14B	false
8645	co	KANSL1L (co) FHL1	false
8646	co	FBXO18 (co) PEAR1	false
8647	co	RP11-286N22.8 (co) TNXB	false
8648	co	ARPC3 (co) C1orf162	false
8649	co	PRKD3 (co) PAFAH1B3	false
8650	co	PRKD3 (co) SAPCD2	false
8651	co	PRKD3 (co) ARHGAP6	false
8652	co	PRKD3 (co) ERG	false
8653	co	TELO2 (co) CDCA3	false
8654	co	TRIM73 (co) CCT3	false
8655	co	PNISR (co) KNTC1	false
8656	co	PNISR (co) EZH2	false
8657	co	TPST2 (co) TEK	false
8658	co	NDUFAF6 (co) STIL	false
8659	co	CP (co) E2F8	false
8660	co	CP (co) NEK2	false
8661	co	WDR55 (co) KIF2C	false
8662	co	WDR55 (co) SPAG5	false
8663	co	WDR55 (co) PLK1	false
8664	co	UBQLN4 (co) CCNA2	false
8665	co	HACL1 (co) DENND2A	false
8666	co	BCAT1 (co) PLAC9	false
8667	co	CCDC64 (co) CDC6	false
8668	co	ACOT13 (co) SAPCD2	false
8669	co	ARID5A (co) CAT	false
8670	co	KIAA0895L (co) CCNA2	false
8671	co	KIAA0895L (co) NLN	false
8672	co	USF1 (co) ARHGEF39	false
8673	co	LAMC3 (co) CDC6	false
8674	co	LAMC3 (co) HIGD1B	false
8675	co	FOXO1 (co) PRAM1	false
8676	co	WDR75 (co) CDC6	false
8677	co	WDR75 (co) PPAT	false
8678	co	SLC35B4 (co) ZWINT	false
8679	co	SLC35B4 (co) PYCR1	false
8680	co	SLC35B4 (co) NME1	false
8681	co	RAMP1 (co) GYPC	false
8682	co	RAMP1 (co) PPP1R14A	false
8683	co	INTS1 (co) TONSL	false
8684	co	MGEA5 (co) KNTC1	false
8685	co	SDC4 (co) LAMP3	false
8686	co	HIST2H2BE (co) SLC25A10	false
8687	co	FAM171A2 (co) CD34	false
8688	co	AP3M2 (co) RHOJ	false
8689	co	AP3M2 (co) CLEC1A	false
8690	co	RRBP1 (co) RTKN2	false
8691	co	STK11 (co) PNPLA6	false
8692	co	MRC2 (co) PLAC9	false
8693	co	NAT14 (co) IGSF9	false
8694	co	PTPRO (co) C19orf59	false
8695	co	CRIPT (co) TTYH3	false
8696	co	BRAT1 (co) EXOC3L1	false
8697	co	BRAT1 (co) SMAD6	false
8698	co	BRAT1 (co) ERO1L	false
8699	co	MEX3B (co) CCNA2	false
8700	co	BCORL1 (co) DENND2A	false
8701	co	BCORL1 (co) NOVA2	false
8702	co	BCORL1 (co) PEAK1	false
8703	co	BCORL1 (co) TIE1	false
8704	co	USP21 (co) PNPLA6	false
8705	co	USP21 (co) DCAF13	false
8706	co	KIF1A (co) P4HB	false
8707	co	RAD52 (co) CCNA2	false
8708	co	CD276 (co) MELK	false
8709	co	CD276 (co) NCAPG	false
8710	co	CD276 (co) CDCA5	false
8711	co	CD276 (co) CCNB2	false
8712	co	FAM171A1 (co) ARHGEF15	false
8713	co	C14orf2 (co) CD93	false
8714	co	PIP5K1C (co) TCF3	false
8715	co	SERTAD1 (co) RASIP1	false
8716	co	SERTAD1 (co) KIF11	false
8717	co	SERTAD1 (co) CSRNP1	false
8718	co	RPE (co) CDC6	false
8719	co	RPE (co) CCNA2	false
8720	co	PRICKLE1 (co) ARHGEF15	false
8721	co	UCHL1 (co) SAPCD2	false
8722	co	INTS4 (co) CCNA2	false
8723	co	TMEM81 (co) CCNA2	false
8724	co	PPP2R5B (co) GRK5	false
8725	co	PPP2R5B (co) TMEM132A	false
8726	co	PPP2R5B (co) ORC6	false
8727	co	PPP2R5B (co) ESAM	false
8728	co	PPP2R5B (co) RASIP1	false
8729	co	PAK4 (co) SMAD6	false
8730	co	GNPAT (co) CCNA2	false
8731	co	HRASLS5 (co) COL11A1	false
8732	co	AVEN (co) CDC6	false
8733	co	COPA (co) CDC6	false
8734	co	FANCL (co) CCNA2	false
8735	co	LILRB4 (co) SCIMP	false
8736	co	VPS13D (co) KDM5B	false
8737	co	C2CD2 (co) RHOJ	false
8738	co	C2CD2 (co) TIE1	false
8739	co	ZNFX1 (co) AKAP2	false
8740	co	SMAD7 (co) SMAD6	false
8741	co	ADPGK (co) KIF1C	false
8742	co	NCOA6 (co) ADRB2	false
8743	co	ZBTB37 (co) PEAK1	false
8744	co	TMEM106A (co) PYCR1	false
8745	co	LUC7L (co) TNXB	false
8746	co	TMEM106B (co) CCNA2	false
8747	co	SRSF5 (co) PYCR1	false
8748	co	DZIP1L (co) LRRC46	false
8749	co	RBP4 (co) GPD1	false
8750	co	WSB2 (co) CCT3	false
8751	co	WSB2 (co) PAICS	false
8752	co	TBC1D3F (co) STARD9	false
8753	co	HPSE (co) AURKA	false
8754	co	HPSE (co) CDC6	false
8755	co	HPSE (co) CFP	false
8756	co	FYCO1 (co) SPTBN1	false
8757	co	TTF2 (co) MKI67	false
8758	co	TTF2 (co) KIF11	false
8759	co	SSPN (co) TNXB	false
8760	co	ARHGAP28 (co) FHL1	false
8761	co	ARHGAP28 (co) ITGA8	false
8762	co	ARHGAP28 (co) AOC3	false
8763	co	PLAGL2 (co) SYT15	false
8764	co	PLAGL2 (co) PHACTR1	false
8765	co	PLAGL2 (co) LAMP3	false
8766	co	KLHL24 (co) FLAD1	false
8767	co	P4HA3 (co) KIF2C	false
8768	co	P4HA3 (co) MYBL2	false
8769	co	P4HA3 (co) CDCA5	false
8770	co	P4HA3 (co) CTHRC1	false
8771	co	TMEM254 (co) ERG	false
8772	co	TMEM254 (co) NEK2	false
8773	co	CCNL2 (co) TENC1	false
8774	co	CCNL2 (co) ADCY4	false
8775	co	SEPT11 (co) FHL1	false
8776	co	SEPT11 (co) LGR4	false
8777	co	SF3B4 (co) LAMP3	false
8778	co	GOLPH3L (co) CAT	false
8779	co	SAMM50 (co) TMEM177	false
8780	co	SAMM50 (co) MCM2	false
8781	co	SNRNP48 (co) CCNA2	false
8782	co	IRGQ (co) CLEC1A	false
8783	co	GTPBP2 (co) DENND3	false
8784	co	GTPBP2 (co) RAD54L	false
8785	co	GTPBP2 (co) OLR1	false
8786	co	GTPBP2 (co) EZH2	false
8787	co	GTPBP2 (co) TRPV2	false
8788	co	GTPBP2 (co) DOCK4	false
8789	co	SDHB (co) RCC1	false
8790	co	PSMA1 (co) EXO1	false
8791	co	TBC1D24 (co) GSTM5	false
8792	co	VIMP (co) PEAR1	false
8793	co	TMEM241 (co) PYCR1	false
8794	co	GRIA1 (co) FAM155B	false
8795	co	SH3BP5L (co) CCNA2	false
8796	co	MRPL14 (co) TNXB	false
8797	co	HSD3B7 (co) PPP1R14B	false
8798	co	HSD3B7 (co) OSCAR	false
8799	co	NARFL (co) PNPLA6	false
8800	co	WDR48 (co) FHL1	false
8801	co	WDR48 (co) PEAR1	false
8802	co	SRSF3 (co) JAM2	false
8803	co	CPEB3 (co) CDH5	false
8804	co	BTN2A1 (co) SNX25	false
8805	co	TLE4 (co) PYCR1	false
8806	co	EPHX3 (co) MYBL2	false
8807	co	EPHX3 (co) SAPCD2	false
8808	co	EPHX3 (co) CHEK1	false
8809	co	LRP8 (co) HIGD1B	false
8810	co	LRP8 (co) RAMP2	false
8811	co	JTB (co) CCNA2	false
8812	co	PTGES2 (co) NME1	false
8813	co	PTGES2 (co) C16orf59	false
8814	co	POP1 (co) PAICS	false
8815	co	MUT (co) LAMP3	false
8816	co	HSPB7 (co) LRRK2	false
8817	co	HSPB7 (co) TMEM243	false
8818	co	MAZ (co) CDC20	false
8819	co	MAZ (co) GINS1	false
8820	co	MAZ (co) STIL	false
8821	co	MAZ (co) GPT2	false
8822	co	MAZ (co) FOXM1	false
8823	co	MAZ (co) PLK1	false
8824	co	MAZ (co) CCNA2	false
8825	co	HIPK2 (co) ERG	false
8826	co	PRDM1 (co) CSRNP1	false
8827	co	SPATA5 (co) RHOJ	false
8828	co	TBXA2R (co) RASIP1	false
8829	co	TBXA2R (co) ESAM	false
8830	co	MITF (co) CDC6	false
8831	co	IL18R1 (co) GINS1	false
8832	co	RIMKLA (co) SUSD2	false
8833	co	FOXJ3 (co) ERG	false
8834	co	PTPRG (co) PRAM1	false
8835	co	PTPRG (co) TRPV2	false
8836	co	PTPRG (co) PNPLA6	false
8837	co	OTUD7B (co) WWC2	false
8838	co	BICC1 (co) THBS2	false
8839	co	BICC1 (co) PLAC9	false
8840	co	DAD1 (co) NME1	false
8841	co	DAD1 (co) PYCR1	false
8842	co	CA5B (co) FHL1	false
8843	co	CA5B (co) NLRC4	false
8844	co	PPFIA4 (co) SCN4B	false
8845	co	SLC26A2 (co) SRPK1	false
8846	co	SLC26A2 (co) S1PR1	false
8847	co	PDCD6 (co) AURKA	false
8848	co	PDCD6 (co) GINS1	false
8849	co	PDCD6 (co) CDC20	false
8850	co	C16orf45 (co) PLAC9	false
8851	co	C16orf45 (co) TNXB	false
8852	co	KCNA4 (co) OTC	false
8853	co	ZNF91 (co) PYCR1	false
8854	co	LONP1 (co) RCC1	false
8855	co	LONP1 (co) SAPCD2	false
8856	co	PTH1R (co) BUB1B	false
8857	co	NOMO3 (co) CCNA2	false
8858	co	DOPEY2 (co) SAPCD2	false
8859	co	DOPEY2 (co) AURKA	false
8860	co	DOPEY2 (co) CHEK1	false
8861	co	ATP6V1E2 (co) SYT15	false
8862	co	ATP6V1E2 (co) LAMP3	false
8863	co	LRP5L (co) TNXB	false
8864	co	LRP5L (co) PNPLA6	false
8865	co	LRP5L (co) ARHGEF39	false
8866	co	LRP5L (co) SPAG5	false
8867	co	SF3A2 (co) COX4I2	false
8868	co	GNL1 (co) CLEC1A	false
8869	co	NXN (co) STIL	false
8870	co	RSL1D1 (co) CDC6	false
8871	co	ATP8A1 (co) DUOX1	false
8872	co	ATP8A1 (co) HSD17B6	false
8873	co	MCOLN1 (co) RCCD1	false
8874	co	MCOLN1 (co) KLHL17	false
8875	co	MCOLN1 (co) ABCC10	false
8876	co	PCGF2 (co) SMAD6	false
8877	co	PCGF2 (co) NOVA2	false
8878	co	PCGF2 (co) TIE1	false
8879	co	TMEM259 (co) SLC39A8	false
8880	co	NUDT3 (co) PLAC9	false
8881	co	NUDT3 (co) TNXB	false
8882	co	NUDT3 (co) DENND2A	false
8883	co	VPS9D1 (co) PNPLA6	false
8884	co	ACTL10 (co) SAPCD2	false
8885	co	GUCD1 (co) SLC25A10	false
8886	co	GUCD1 (co) DOCK4	false
8887	co	SAMD4A (co) AKAP2	false
8888	co	GTF2H4 (co) CCNA2	false
8889	co	ULK2 (co) KPNA2	false
8890	co	HLA-F (co) LAMP3	false
8891	co	TMEM63A (co) CCNA2	false
8892	co	UBR2 (co) ATAD2	false
8893	co	UBR2 (co) SPTBN1	false
8894	co	UBR2 (co) PAFAH1B3	false
8895	co	UBR2 (co) ARHGAP6	false
8896	co	LUZP1 (co) NOVA2	false
8897	co	ZNF443 (co) CCNA2	false
8898	co	TSEN54 (co) FAM162B	false
8899	co	TSEN54 (co) CCNA2	false
8900	co	ASPRV1 (co) GINS1	false
8901	co	ASPRV1 (co) CCNB2	false
8902	co	ASPRV1 (co) CDC20	false
8903	co	ASPRV1 (co) NEK2	false
8904	co	ASPRV1 (co) CDC6	false
8905	co	WRAP53 (co) IGSF9	false
8906	co	SLC35F6 (co) FXYD1	false
8907	co	MRPL38 (co) CCNA2	false
8908	co	MRPL38 (co) PNPLA6	false
8909	co	TOP3B (co) PNPLA6	false
8910	co	TOP3B (co) CCNA2	false
8911	co	TMA7 (co) DLC1	false
8912	co	TTC14 (co) RCC1	false
8913	co	BACE2 (co) AATK	false
8914	co	BACE2 (co) CTHRC1	false
8915	co	ZMIZ1 (co) CCNA2	false
8916	co	PLA2G16 (co) SLC25A10	false
8917	co	DUSP23 (co) SAPCD2	false
8918	co	DUSP23 (co) C1orf198	false
8919	co	CELSR2 (co) NFIX	false
8920	co	C6orf89 (co) TIMELESS	false
8921	co	ZNF93 (co) MELK	false
8922	co	ZNF93 (co) NDC80	false
8923	co	ZNF93 (co) IQGAP3	false
8924	co	MORF4L2 (co) CDC6	false
8925	co	MORF4L2 (co) DPEP2	false
8926	co	NFKB2 (co) CAT	false
8927	co	TBC1D9 (co) CDC20	false
8928	co	SORL1 (co) SLC25A10	false
8929	co	IGDCC4 (co) CD34	false
8930	co	WDR26 (co) TMEM177	false
8931	co	WDR26 (co) PRC1	false
8932	co	IGFBP4 (co) TNXB	false
8933	co	IGFLR1 (co) PTPN21	false
8934	co	TUBG1 (co) CDC20	false
8935	co	TUBG1 (co) MYBL2	false
8936	co	TUBG1 (co) GINS1	false
8937	co	TUBG1 (co) AURKA	false
8938	co	TUBG1 (co) CCNF	false
8939	co	EHD3 (co) KIF17	false
8940	co	ZFP41 (co) MVB12B	false
8941	co	COPS7B (co) ADCY4	false
8942	co	COPS7B (co) PNPLA6	false
8943	co	COPS7B (co) CCNA2	false
8944	co	FAM189B (co) CCNA2	false
8945	co	PPM1F (co) ST7	false
8946	co	PPM1F (co) FAM189B	false
8947	co	CHD1L (co) CCNA2	false
8948	co	UNC93B1 (co) HMGB3	false
8949	co	DENND4B (co) PNPLA6	false
8950	co	KLHL23 (co) AOC3	false
8951	co	KLHL23 (co) PEAR1	false
8952	co	KLHL23 (co) TNS1	false
8953	co	PIAS1 (co) MSI2	false
8954	co	THNSL2 (co) HSPA12B	false
8955	co	POLR3D (co) CDC6	false
8956	co	HHIPL1 (co) MMP11	false
8957	co	NUMA1 (co) NME1	false
8958	co	CEP164 (co) PNPLA6	false
8959	co	CAPN5 (co) IQGAP3	false
8960	co	METTL2B (co) CDC6	false
8961	co	NKIRAS2 (co) NME1	false
8962	co	TMEM200A (co) SYNJ2	false
8963	co	ZNF696 (co) SMAD6	false
8964	co	GLRX2 (co) CCNA2	false
8965	co	GLRX2 (co) CDC6	false
8966	co	NEDD9 (co) CCNA2	false
8967	co	ARNTL2 (co) RTKN2	false
8968	co	BCLAF1 (co) SPTBN1	false
8969	co	BCLAF1 (co) PEAK1	false
8970	co	SCAF4 (co) EZH2	false
8971	co	SCAF4 (co) CLEC1A	false
8972	co	ADSS (co) KIF11	false
8973	co	YME1L1 (co) PAICS	false
8974	co	MAP2 (co) ESAM	false
8975	co	MAP2 (co) HELLS	false
8976	co	MAP2 (co) PEAK1	false
8977	co	PLSCR1 (co) SYT15	false
8978	co	PLSCR1 (co) SRPK1	false
8979	co	BCAP29 (co) PNPLA6	false
8980	co	HSF2 (co) STX11	false
8981	co	CENPT (co) PLAC9	false
8982	co	CENPT (co) PSAT1	false
8983	co	PRCD (co) CDC6	false
8984	co	PDE7A (co) PEAK1	false
8985	co	PDE7A (co) TIE1	false
8986	co	SLMO2 (co) USHBP1	false
8987	co	SLC35A1 (co) HSD17B6	false
8988	co	SLC35A1 (co) RTKN2	false
8989	co	PRDM6 (co) LGR4	false
8990	co	BLOC1S5 (co) CCNA2	false
8991	co	CARHSP1 (co) PLAC9	false
8992	co	CARHSP1 (co) TNXB	false
8993	co	C15orf65 (co) LRRC46	false
8994	co	NFIX (co) FGR	false
8995	co	NFIX (co) XYLT2	false
8996	co	SLC9A7 (co) MRC1L1	false
8997	co	C11orf21 (co) SIRPG	false
8998	co	RNF126 (co) RAPGEF4	false
8999	co	ERI2 (co) GINS1	false
9000	co	ERI2 (co) CCNA2	false
9001	co	MFGE8 (co) FBLN5	false
9002	co	EPHA3 (co) MMP11	false
9003	co	EPHA3 (co) COL10A1	false
9004	co	EML5 (co) HSD17B6	false
9005	co	TSHZ1 (co) FGD5	false
9006	co	TSHZ1 (co) FHL1	false
9007	co	TSHZ1 (co) TNXB	false
9008	co	TSHZ1 (co) GRK5	false
9009	co	AIFM2 (co) TMEM177	false
9010	co	AIFM2 (co) PYCR1	false
9011	co	MINK1 (co) ARHGEF39	false
9012	co	MINK1 (co) KNTC1	false
9013	co	ASPSCR1 (co) ERG	false
9014	co	HGS (co) SPAG5	false
9015	co	HGS (co) PNPLA6	false
9016	co	MIER3 (co) GNAQ	false
9017	co	MAP4K2 (co) GNG11	false
9018	co	MAP4K2 (co) KANK3	false
9019	co	MAP4K2 (co) NOVA2	false
9020	co	MAP4K2 (co) CDH5	false
9021	co	MAP4K2 (co) COX4I2	false
9022	co	MAP4K2 (co) PEAR1	false
9023	co	FASTKD2 (co) PAICS	false
9024	co	PTPN6 (co) SVEP1	false
9025	co	PTPN6 (co) C19orf59	false
9026	co	RBM5 (co) SPTBN1	false
9027	co	RBM5 (co) KNTC1	false
9028	co	ARHGEF40 (co) PLAC9	false
9029	co	FAM126B (co) CLEC1A	false
9030	co	FAM126B (co) SRPK1	false
9031	co	DMPK (co) TNXB	false
9032	co	RNASE13 (co) NMBR	false
9033	co	FAM63A (co) CCM2L	false
9034	co	FAM63A (co) USHBP1	false
9035	co	SEMA6C (co) TENC1	false
9036	co	PHYKPL (co) STX11	false
9037	co	NPIPB5 (co) STARD9	false
9038	co	C19orf40 (co) AURKA	false
9039	co	C19orf40 (co) GINS1	false
9040	co	CHTOP (co) CCNA2	false
9041	co	CHML (co) GNAQ	false
9042	co	B3GNTL1 (co) NEK2	false
9043	co	B3GNTL1 (co) KIF2C	false
9044	co	B3GNTL1 (co) CDC20	false
9045	co	B3GNTL1 (co) SPAG5	false
9046	co	B3GNTL1 (co) UBE2C	false
9047	co	ASNS (co) CDC6	false
9048	co	ABCA10 (co) CD300C	false
9049	co	INSC (co) CCDC141	false
9050	co	INSC (co) LGI3	false
9051	co	SOCS7 (co) COX4I2	false
9052	co	TTC21A (co) PPAP2C	false
9053	co	ARL8B (co) TIE1	false
9054	co	PLXDC1 (co) PEAR1	false
9055	co	ST3GAL4 (co) SECISBP2L	false
9056	co	KCNQ2 (co) RPL24	false
9057	co	CIAO1 (co) STIL	false
9058	co	CIAO1 (co) GINS1	false
9059	co	WIPF3 (co) DES	false
9060	co	DLAT (co) PEAR1	false
9061	co	DLAT (co) PYCR1	false
9062	co	GNG12 (co) ERG	false
9063	co	PTGFRN (co) UBE2C	false
9064	co	PTGFRN (co) PLK1	false
9065	co	PTGFRN (co) MELK	false
9066	co	PTGFRN (co) KIF11	false
9067	co	PTGFRN (co) RAD54L	false
9068	co	KLHDC1 (co) USHBP1	false
9069	co	UAP1 (co) LRRC32	false
9070	co	PID1 (co) CCNA2	false
9071	co	ENDOD1 (co) EZH2	false
9072	co	NOX4 (co) CFD	false
9073	co	NOX4 (co) PRKG1	false
9074	co	NOX4 (co) ECM2	false
9075	co	NOX4 (co) FIBIN	false
9076	co	NOX4 (co) ABCA6	false
9077	co	NOX4 (co) COX7A1	false
9078	co	NOX4 (co) FAM13C	false
9079	co	NOX4 (co) TMEM47	false
9080	co	PXDN (co) CD93	false
9081	co	PXDN (co) CLEC1A	false
9082	co	PXDN (co) ERG	false
9083	co	SELRC1 (co) LGR4	false
9084	co	PYCR2 (co) SAPCD2	false
9085	co	CHRDL1 (co) KIF4A	false
9086	co	CHRDL1 (co) SAPCD2	false
9087	co	CHRDL1 (co) C16orf59	false
9088	co	CHRDL1 (co) XRCC2	false
9089	co	CHRDL1 (co) NEK2	false
9090	co	NSMF (co) RAD54L	false
9091	co	NSMF (co) CAT	false
9092	co	NSMF (co) HSD17B6	false
9093	co	PLEK (co) HYAL1	false
9094	co	PLEK (co) DAPK2	false
9095	co	THRSP (co) RPS27A	false
9096	co	MRPS2 (co) SAPCD2	false
9097	co	CTB-129P6.11 (co) LINC00935	false
9098	co	GJB7 (co) MS4A8	false
9099	co	METTL21A (co) CCNA2	false
9100	co	ZNF181 (co) PRC1	false
9101	co	DCAF5 (co) DONSON	false
9102	co	TMEM216 (co) KDM5B	false
9103	co	ABHD6 (co) MKI67	false
9104	co	ELMOD2 (co) CCNA2	false
9105	co	ELMOD2 (co) GINS1	false
9106	co	OGG1 (co) TONSL	false
9107	co	GRB2 (co) HN1	false
9108	co	STIP1 (co) CCNA2	false
9109	co	KLRK1 (co) SYT15	false
9110	co	KLRK1 (co) MCM4	false
9111	co	AMPD2 (co) DOCK4	false
9112	co	AMPD2 (co) C5AR1	false
9113	co	WDR45B (co) RCC1	false
9114	co	CTDNEP1 (co) CCT3	false
9115	co	CTDNEP1 (co) PAFAH1B3	false
9116	co	CTDNEP1 (co) RCC1	false
9117	co	CTDNEP1 (co) GPT2	false
9118	co	GPR160 (co) PLAC9	false
9119	co	MED15 (co) CLEC1A	false
9120	co	TRAK2 (co) OSCAR	false
9121	co	DPH7 (co) ADCY4	false
9122	co	DCXR (co) MMRN2	false
9123	co	DOK3 (co) LEPR	false
9124	co	DOK3 (co) ABI3BP	false
9125	co	DOK3 (co) C19orf59	false
9126	co	DOK3 (co) DOCK4	false
9127	co	TCTA (co) LRRC32	false
9128	co	TCTA (co) CLEC1A	false
9129	co	TCTA (co) RAPGEF4	false
9130	co	TCTA (co) SLC25A10	false
9131	co	YIPF1 (co) GINS1	false
9132	co	YIPF1 (co) NME1	false
9133	co	PAFAH1B1 (co) C1orf198	false
9134	co	LARP4 (co) CCM2L	false
9135	co	BRICD5 (co) PNPLA6	false
9136	co	PLAGL1 (co) AURKA	false
9137	co	PLAGL1 (co) CDC20	false
9138	co	PLAGL1 (co) MYBL2	false
9139	co	PLAGL1 (co) CDC6	false
9140	co	MRPS17 (co) CCNB1	false
9141	co	MRPS17 (co) DONSON	false
9142	co	MRPS17 (co) LGR4	false
9143	co	MRPS17 (co) CDC6	false
9144	co	MRPS17 (co) AURKA	false
9145	co	SNAP47 (co) CDCA8	false
9146	co	SNAP47 (co) CDC6	false
9147	co	SNAP47 (co) CDC20	false
9148	co	SNAP47 (co) MCM4	false
9149	co	SNAP47 (co) GINS1	false
9150	co	ASAH2B (co) GINS1	false
9151	co	ASAH2B (co) CDC20	false
9152	co	ASAH2B (co) AURKA	false
9153	co	ASAH2B (co) CDC6	false
9154	co	RPSAP58 (co) DENND2A	false
9155	co	RPSAP58 (co) C17orf53	false
9156	co	MEN1 (co) CCNA2	false
9157	co	NLRP1 (co) PYCR1	false
9158	co	RNF144B (co) KIF2C	false
9159	co	RNF144B (co) CCNA2	false
9160	co	NOA1 (co) KIF11	false
9161	co	NOA1 (co) DONSON	false
9162	co	NOA1 (co) MAD2L1	false
9163	co	NOA1 (co) NEK2	false
9164	co	NOA1 (co) NCAPG2	false
9165	co	NOA1 (co) SAPCD2	false
9166	co	PSMD9 (co) PYCR1	false
9167	co	PSMD9 (co) NME1	false
9168	co	C7orf73 (co) KDM5B	false
9169	co	C7orf73 (co) GINS1	false
9170	co	C7orf73 (co) NLRC4	false
9171	co	SHANK2 (co) HSD17B6	false
9172	co	SHANK2 (co) MGAT3	false
9173	co	FAM117B (co) NME1	false
9174	co	RNF166 (co) ARHGEF39	false
9175	co	RNF166 (co) PNPLA6	false
9176	co	MAPK13 (co) SAPCD2	false
9177	co	MAPK13 (co) AURKA	false
9178	co	MAPK13 (co) FHL1	false
9179	co	C12orf76 (co) ERG	false
9180	co	XBP1 (co) PLAC9	false
9181	co	CDK8 (co) CLEC1A	false
9182	co	CDK8 (co) AGTPBP1	false
9183	co	CDK8 (co) RAPGEF4	false
9184	co	OVOL2 (co) SYNJ2	false
9185	co	OVOL2 (co) DAPK2	false
9186	co	BTF3L4 (co) CDC20	false
9187	co	BTF3L4 (co) HMMR	false
9188	co	BTF3L4 (co) GINS1	false
9189	co	BTF3L4 (co) NME1	false
9190	co	TRAPPC2L (co) DLC1	false
9191	co	TRAPPC2L (co) CLEC1A	false
9192	co	TRAPPC2L (co) MCM2	false
9193	co	HEXIM2 (co) SAPCD2	false
9194	co	HYI (co) SLC25A10	false
9195	co	CXorf40B (co) PDE1B	false
9196	co	SHF (co) PEAR1	false
9197	co	SHF (co) TIE1	false
9198	co	USP13 (co) LAMP3	false
9199	co	SLC22A18 (co) KIF11	false
9200	co	SLC22A18 (co) NEK2	false
9201	co	SLC22A18 (co) CDC20	false
9202	co	DLL1 (co) GINS1	false
9203	co	TMEM154 (co) RASGRP4	false
9204	co	PPA1 (co) NME1	false
9205	co	PPA1 (co) PAICS	false
9206	co	PITPNM2 (co) ESAM	false
9207	co	PITPNM2 (co) CDH5	false
9208	co	TNRC6A (co) PAFAH1B3	false
9209	co	TNRC6A (co) STARD9	false
9210	co	TNRC6A (co) PEAR1	false
9211	co	RNF144A (co) FGD5	false
9212	co	RNF144A (co) ARHGEF15	false
9213	co	RNF144A (co) CYYR1	false
9214	co	PLA2G7 (co) CEACAM21	false
9215	co	C14orf79 (co) IGSF9	false
9216	co	BAZ1B (co) KIF1C	false
9217	co	HNRNPLL (co) RHOJ	false
9218	co	HNRNPLL (co) FLAD1	false
9219	co	HNRNPLL (co) CLEC1A	false
9220	co	VAMP3 (co) LGR4	false
9221	co	HSF4 (co) LRP2BP	false
9222	co	PTTG2 (co) RP11-144F15.1	false
9223	co	LCP2 (co) SNX25	false
9224	co	TPM4 (co) C1orf198	false
9225	co	CFH (co) TNXB	false
9226	co	LARS2 (co) SAPCD2	false
9227	co	LARS2 (co) CDC6	false
9228	co	H3F3A (co) CCNA2	false
9229	co	FDX1 (co) TENC1	false
9230	co	LRCH3 (co) PEAK1	false
9231	co	FASTKD3 (co) CCNB1	false
9232	co	FASTKD3 (co) CDCA8	false
9233	co	BTAF1 (co) PAFAH1B3	false
9234	co	IKZF5 (co) SAPCD2	false
9235	co	CALCOCO2 (co) FBLN5	false
9236	co	CALCOCO2 (co) FHL1	false
9237	co	CALCOCO2 (co) ARHGAP6	false
9238	co	MEX3D (co) DAP3	false
9239	co	MEX3D (co) GNA11	false
9240	co	ACBD6 (co) GINS2	false
9241	co	ACBD6 (co) GINS1	false
9242	co	ACBD6 (co) NCAPG2	false
9243	co	RHOT2 (co) TBX2	false
9244	co	RHOT2 (co) PNPLA6	false
9245	co	RHOT2 (co) NLN	false
9246	co	RHOT2 (co) OLA1	false
9247	co	MFSD3 (co) SAPCD2	false
9248	co	MFSD3 (co) PAFAH1B3	false
9249	co	ZNF517 (co) SRPK1	false
9250	co	ZNF517 (co) ECT2	false
9251	co	ZNF517 (co) USHBP1	false
9252	co	ANKRD27 (co) CCNB2	false
9253	co	ANKRD27 (co) CDC20	false
9254	co	ANKRD27 (co) CHAF1B	false
9255	co	DDX49 (co) SAPCD2	false
9256	co	DDX49 (co) PYCR1	false
9257	co	DDX49 (co) NME1	false
9258	co	SMCR8 (co) PHACTR1	false
9259	co	BET1 (co) CENPK	false
9260	co	TRIM45 (co) IGSF10	false
9261	co	LCA5 (co) LGR4	false
9262	co	LCA5 (co) SIX4	false
9263	co	LRR1 (co) CD300C	false
9264	co	LRR1 (co) CDC6	false
9265	co	LRR1 (co) GGCT	false
9266	co	PPME1 (co) NME1	false
9267	co	PPME1 (co) CDC6	false
9268	co	HIP1 (co) CDH5	false
9269	co	HIP1 (co) SPTBN1	false
9270	co	HIP1 (co) GRK5	false
9271	co	THAP11 (co) CLEC1A	false
9272	co	RNF149 (co) ERO1L	false
9273	co	BCL2L12 (co) SAPCD2	false
9274	co	BCL2L12 (co) CDC20	false
9275	co	BCL2L12 (co) MCM4	false
9276	co	BCL2L12 (co) CHEK1	false
9277	co	BCL2L12 (co) NEK2	false
9278	co	BCL2L12 (co) CCNB1	false
9279	co	BCL2L12 (co) AURKA	false
9280	co	ANO2 (co) EXO1	false
9281	co	ANO2 (co) VEPH1	false
9282	co	ANO2 (co) NEK2	false
9283	co	LRRC8D (co) ESAM	false
9284	co	LRRC8D (co) GINS1	false
9285	co	LRRC8D (co) ZWINT	false
9286	co	LRRC8D (co) SAPCD2	false
9287	co	LDLRAD3 (co) RAMP2	false
9288	co	TMEM71 (co) SRPK1	false
9289	co	UTP20 (co) GNG11	false
9290	co	UTP20 (co) NME1	false
9291	co	UTP20 (co) FXYD1	false
9292	co	LGI2 (co) KIF11	false
9293	co	LGI2 (co) KIF2C	false
9294	co	ADAMTS14 (co) KIAA0408	false
9295	co	SMIM1 (co) ERG	false
9296	co	CYP2S1 (co) FERMT1	false
9297	co	RTN4R (co) SYT15	false
9298	co	RTN4R (co) FHL1	false
9299	co	RTN4R (co) PAFAH1B3	false
9300	co	NIPSNAP3B (co) PEAR1	false
9301	co	NIPSNAP3B (co) TNXB	false
9302	co	HINFP (co) ADCY4	false
9303	co	HINFP (co) CCNA2	false
9304	co	TMEM261 (co) PEAK1	false
9305	co	TMEM261 (co) PAFAH1B3	false
9306	co	HIGD1A (co) GGCT	false
9307	co	HIGD1A (co) PAICS	false
9308	co	RAPH1 (co) TNS1	false
9309	co	RAPH1 (co) ARHGAP6	false
9310	co	RAPH1 (co) S1PR1	false
9311	co	RAPH1 (co) STARD13	false
9312	co	UBL4A (co) RALGPS2	false
9313	co	UBL4A (co) DONSON	false
9314	co	PRKAA2 (co) FHL1	false
9315	co	ASAP1 (co) GINS1	false
9316	co	SPAG16 (co) LRRC46	false
9317	co	ZDHHC16 (co) SAPCD2	false
9318	co	ACOT9 (co) SRPK1	false
9319	co	NDUFA8 (co) PAFAH1B3	false
9320	co	TMEM104 (co) PYCR1	false
9321	co	GBP5 (co) CLEC1A	false
9322	co	VPS26B (co) KANK2	false
9323	co	CERS2 (co) SYT15	false
9324	co	CERS2 (co) ERG	false
9325	co	CERS2 (co) TIMELESS	false
9326	co	CERS2 (co) PLAC9	false
9327	co	CERS2 (co) CCT3	false
9328	co	CERS2 (co) SLC39A8	false
9329	co	RUVBL2 (co) LRRC46	false
9330	co	MITD1 (co) CCNA2	false
9331	co	SNX15 (co) CCM2L	false
9332	co	NHLRC1 (co) ADRB2	false
9333	co	NHLRC1 (co) SAPCD2	false
9334	co	TTC13 (co) CCNA2	false
9335	co	TTC13 (co) PNPLA6	false
9336	co	GALNT18 (co) KIF2C	false
9337	co	GALNT18 (co) NEK2	false
9338	co	GALNT18 (co) KIF11	false
9339	co	GALNT18 (co) CCNA2	false
9340	co	PLXNB3 (co) HSPA12B	false
9341	co	PLXNB3 (co) RAMP2	false
9342	co	PLXNB3 (co) SMAD6	false
9343	co	CREB3L4 (co) CDC20	false
9344	co	CREB3L4 (co) CCNA2	false
9345	co	CREB3L4 (co) NEK2	false
9346	co	CDC123 (co) TNXB	false
9347	co	CDC123 (co) STIL	false
9348	co	CDC123 (co) GINS1	false
9349	co	TP53RK (co) PAICS	false
9350	co	CNTNAP1 (co) TNXB	false
9351	co	CEP70 (co) GNG11	false
9352	co	CEP70 (co) ARHGEF15	false
9353	co	PALMD (co) BUB1B	false
9354	co	SLC39A4 (co) DONSON	false
9355	co	SLC39A4 (co) ERG	false
9356	co	SLC39A4 (co) CCNB1	false
9357	co	SLC39A4 (co) TIMELESS	false
9358	co	SLC39A4 (co) MCM2	false
9359	co	SLC39A4 (co) AURKA	false
9360	co	SLC39A4 (co) TMEM177	false
9361	co	SLC39A4 (co) CHEK1	false
9362	co	SLC39A4 (co) CDC20	false
9363	co	SLC39A4 (co) CDC6	false
9364	co	MAP3K7CL (co) ADRB2	false
9365	co	KIF20B (co) KIF15	false
9366	co	KIF20B (co) KIF11	false
9367	co	KIF20B (co) GINS1	false
9368	co	KIF20B (co) AURKA	false
9369	co	KIF20B (co) HIST1H2BD	false
9370	co	EFHC1 (co) PPAP2C	false
9371	co	EFHC1 (co) SIX4	false
9372	co	PHKG2 (co) SPAG5	false
9373	co	PHKG2 (co) PLK1	false
9374	co	TCEB2 (co) CDC20	false
9375	co	TCEB2 (co) C16orf59	false
9376	co	METTL21B (co) CCNA2	false
9377	co	METTL21B (co) KIF2C	false
9378	co	BMP2 (co) STX11	false
9379	co	BMP2 (co) CCNA2	false
9380	co	BMP2 (co) CSRNP1	false
9381	co	XPOT (co) KDELR2	false
9382	co	MYCBPAP (co) NGEF	false
9383	co	BCR (co) KIF1C	false
9384	co	RCOR3 (co) NME1	false
9385	co	ACAD10 (co) C16orf59	false
9386	co	ACAD10 (co) SAPCD2	false
9387	co	ATG2A (co) CLEC1A	false
9388	co	RPS6KB1 (co) SLC25A10	false
9389	co	PPP2R2D (co) NOVA2	false
9390	co	TIAM2 (co) TNXB	false
9391	co	TIAM2 (co) DENND2A	false
9392	co	TIAM2 (co) TIE1	false
9393	co	TIAM2 (co) JAM2	false
9394	co	TIAM2 (co) C1orf198	false
9395	co	EAF1 (co) TIE1	false
9396	co	EAF1 (co) EFCC1	false
9397	co	ARHGEF5 (co) STX11	false
9398	co	VSTM4 (co) SLIT2	false
9399	co	VSTM4 (co) IGSF10	false
9400	co	VSTM4 (co) FHL1	false
9401	co	VSTM4 (co) ABCA8	false
9402	co	EPHA4 (co) CAT	false
9403	co	RASSF6 (co) FAM105A	false
9404	co	MTHFD1L (co) CLEC1A	false
9405	co	MTHFD1L (co) RAPGEF4	false
9406	co	TP53I13 (co) PNPLA6	false
9407	co	CBX8 (co) CCNA2	false
9408	co	IFFO1 (co) STX11	false
9409	co	IFFO1 (co) C1QTNF6	false
9410	co	NCL (co) STIL	false
9411	co	TXN2 (co) CDH5	false
9412	co	TXN2 (co) ERG	false
9413	co	TXN2 (co) PAFAH1B3	false
9414	co	SOCS4 (co) SRPK1	false
9415	co	CD72 (co) OLR1	false
9416	co	CD72 (co) ARHGEF39	false
9417	co	TBX21 (co) SAPCD2	false
9418	co	SIRPG (co) TBX21	false
9419	co	G6PC3 (co) SAPCD2	false
9420	co	XPO4 (co) HSPB2	false
9421	co	XPO4 (co) DIEXF	false
9422	co	UQCRC2 (co) PSAT1	false
9423	co	RRP1B (co) NME1	false
9424	co	RRP1B (co) PPAT	false
9425	co	RRP1B (co) TMEM177	false
9426	co	RRP1B (co) CDC6	false
9427	co	GPR98 (co) SNX25	false
9428	co	GPR98 (co) HSD17B6	false
9429	co	TPM3 (co) PRKCE	false
9430	co	CD46 (co) GNAQ	false
9431	co	CORO7 (co) PNPLA6	false
9432	co	CORO7 (co) ARHGEF39	false
9433	co	CCDC28B (co) PLAC9	false
9434	co	XRCC5 (co) PAICS	false
9435	co	STK39 (co) NCAPG	false
9436	co	STK39 (co) NEK2	false
9437	co	STK39 (co) KIF11	false
9438	co	C5orf63 (co) PSAT1	false
9439	co	C5orf63 (co) CDH5	false
9440	co	PAPD4 (co) ARHGEF39	false
9441	co	PAPD4 (co) ATAD2	false
9442	co	WDFY1 (co) CLEC1A	false
9443	co	SYNE3 (co) NLRC4	false
9444	co	SYNE3 (co) AURKA	false
9445	co	SYNE3 (co) CCNB1	false
9446	co	SYNE3 (co) GINS1	false
9447	co	SYNE3 (co) ORC6	false
9448	co	SYNE3 (co) SYNJ2	false
9449	co	SMTN (co) TNXB	false
9450	co	SMTN (co) FXYD1	false
9451	co	SH3BP2 (co) PNPLA6	false
9452	co	EIF4E2 (co) TNXB	false
9453	co	RNASEH2B (co) ERG	false
9454	co	LSAMP (co) SULF1	false
9455	co	LSAMP (co) THY1	false
9456	co	KIAA1147 (co) EFCC1	false
9457	co	KIAA1147 (co) SPTBN1	false
9458	co	KIAA1147 (co) PEAK1	false
9459	co	KIAA1147 (co) FHL1	false
9460	co	TRAF2 (co) CCNA2	false
9461	co	POLD2 (co) PDIA4	false
9462	co	POLD2 (co) PYCR1	false
9463	co	POLD2 (co) NME1	false
9464	co	CERS6 (co) NEDD9	false
9465	co	CERS6 (co) FAM105A	false
9466	co	CERS6 (co) ANKS1A	false
9467	co	CERS6 (co) ZNF106	false
9468	co	TIRAP (co) TIMELESS	false
9469	co	TIRAP (co) CLEC1A	false
9470	co	TIRAP (co) SYT15	false
9471	co	PPP2R5E (co) STX11	false
9472	co	PPP2R5E (co) GNAQ	false
9473	co	PPP2R5E (co) AKAP2	false
9474	co	ATP6AP1 (co) PLAC9	false
9475	co	ATP6AP1 (co) FXYD1	false
9476	co	CCDC117 (co) CLEC1A	false
9477	co	CCDC117 (co) SLC25A10	false
9478	co	C19orf52 (co) GINS1	false
9479	co	RGS11 (co) TNXB	false
9480	co	NUP85 (co) PDE1B	false
9481	co	PCDHAC2 (co) CASP12	false
9482	co	PPM1D (co) CDC20	false
9483	co	PPM1D (co) NEK2	false
9484	co	PPM1D (co) SPAG5	false
9485	co	PPM1D (co) ARHGEF39	false
9486	co	KDELR3 (co) UBE2C	false
9487	co	KDELR3 (co) CDCA5	false
9488	co	KDELR3 (co) LEPREL4	false
9489	co	KDELR3 (co) PYCR1	false
9490	co	KDELR3 (co) MYBL2	false
9491	co	KDELR3 (co) CDC6	false
9492	co	ARRDC4 (co) PDK1	false
9493	co	ARRDC4 (co) SMAD6	false
9494	co	ARRDC4 (co) ADRB2	false
9495	co	ARRDC4 (co) DONSON	false
9496	co	FBXL8 (co) SAPCD2	false
9497	co	CLASP2 (co) PPP1R14B	false
9498	co	CLASP2 (co) CDC6	false
9499	co	SOX12 (co) CCNA2	false
9500	co	ZNF254 (co) PYCR1	false
9501	co	ADAM28 (co) BUB1B	false
9502	co	ADAM28 (co) PRC1	false
9503	co	PYGO2 (co) CCNA2	false
9504	co	PHLDB1 (co) SPTBN1	false
9505	co	PHLDB1 (co) ROBO4	false
9506	co	COX10 (co) PYCR1	false
9507	co	COX10 (co) NME1	false
9508	co	PCDHB12 (co) TNXB	false
9509	co	AZI1 (co) ADCY4	false
9510	co	AZI1 (co) PAICS	false
9511	co	AZI1 (co) NLN	false
9512	co	TRPV4 (co) IGSF9	false
9513	co	RPS6KA4 (co) SAPCD2	false
9514	co	COL4A3BP (co) PLAC9	false
9515	co	COL4A3BP (co) PKNOX2	false
9516	co	COL4A3BP (co) GALNT7	false
9517	co	UFSP1 (co) SAPCD2	false
9518	co	UFSP1 (co) FHL1	false
9519	co	TSN (co) DONSON	false
9520	co	PIEZO2 (co) FAM105A	false
9521	co	MPEG1 (co) SGPL1	false
9522	co	MPEG1 (co) TIMELESS	false
9523	co	MPEG1 (co) PEAK1	false
9524	co	MPEG1 (co) TIE1	false
9525	co	MPEG1 (co) PKNOX2	false
9526	co	MPEG1 (co) CRY2	false
9527	co	MPEG1 (co) PHACTR2	false
9528	co	MPEG1 (co) PSMG3	false
9529	co	MPEG1 (co) PLAC9	false
9530	co	MPEG1 (co) FXYD1	false
9531	co	MPEG1 (co) DENND3	false
9532	co	MPEG1 (co) DOCK4	false
9533	co	RGS22 (co) OTX1	false
9534	co	APBB2 (co) AURKA	false
9535	co	APBB2 (co) UBE2C	false
9536	co	APBB2 (co) LGR4	false
9537	co	APBB2 (co) FHL1	false
9538	co	APBB2 (co) MYBL2	false
9539	co	APBB2 (co) CDC6	false
9540	co	APBB2 (co) CDC20	false
9541	co	COL15A1 (co) CD34	false
9542	co	COL15A1 (co) ZEB2	false
9543	co	COL15A1 (co) CTHRC1	false
9544	co	WDR52 (co) LRRC46	false
9545	co	IL20RA (co) NECAB1	false
9546	co	CCNI2 (co) STIL	false
9547	co	CCNI2 (co) SAPCD2	false
9548	co	CKLF (co) C19orf59	false
9549	co	KLHDC9 (co) LRRC46	false
9550	co	PTOV1 (co) PNPLA6	false
9551	co	PTOV1 (co) TBX2	false
9552	co	PTOV1 (co) TIE1	false
9553	co	KIF14 (co) GCNT3	false
9554	co	KIF14 (co) ACTN2	false
9555	co	KIF14 (co) EPAS1	false
9556	co	ACAP1 (co) TNXB	false
9557	co	PAPSS1 (co) PERP	false
9558	co	PAPSS1 (co) ESRP1	false
9559	co	ANKIB1 (co) PSMG3	false
9560	co	ANKIB1 (co) ABI3BP	false
9561	co	ANKIB1 (co) SERINC1	false
9562	co	ANKIB1 (co) DOCK4	false
9563	co	BASP1 (co) HSD17B6	false
9564	co	BASP1 (co) SYT15	false
9565	co	BASP1 (co) SRPK1	false
9566	co	FCN1 (co) IL4I1	false
9567	co	FBXO22 (co) CCNA2	false
9568	co	GGT1 (co) DOCK4	false
9569	co	TSR3 (co) PAFAH1B3	false
9570	co	TYSND1 (co) SULF1	false
9571	co	TYSND1 (co) ERG	false
9572	co	TYSND1 (co) XPR1	false
9573	co	TYSND1 (co) KDM5B	false
9574	co	TYSND1 (co) ERO1L	false
9575	co	TYSND1 (co) NLRC4	false
9576	co	TYSND1 (co) AKAP2	false
9577	co	CDK20 (co) IGSF9	false
9578	co	IQCC (co) CDCA8	false
9579	co	IQCC (co) CDC20	false
9580	co	IQCC (co) STIL	false
9581	co	IQCC (co) NEK2	false
9582	co	SCYL2 (co) PAFAH1B3	false
9583	co	SCYL2 (co) GNAQ	false
9584	co	JUND (co) GINS1	false
9585	co	JUND (co) CSRNP1	false
9586	co	RHOD (co) GINS1	false
9587	co	RHOD (co) SAPCD2	false
9588	co	RHOD (co) CDH5	false
9589	co	RHOD (co) PAFAH1B3	false
9590	co	KIAA1755 (co) TNXB	false
9591	co	PHLPP2 (co) ERG	false
9592	co	SHC1 (co) RTKN2	false
9593	co	SHC1 (co) HSD17B6	false
9594	co	GPN2 (co) CDCA8	false
9595	co	GPN2 (co) CCNB1	false
9596	co	GPN2 (co) LGR4	false
9597	co	GPN2 (co) CCNB2	false
9598	co	GPN2 (co) CDCA5	false
9599	co	GPN2 (co) NLRC4	false
9600	co	GPN2 (co) AURKA	false
9601	co	GPN2 (co) CDC20	false
9602	co	SNRNP40 (co) NME1	false
9603	co	MORC2 (co) CCNA2	false
9604	co	JAZF1 (co) PLAC9	false
9605	co	JAZF1 (co) TNXB	false
9606	co	JAZF1 (co) FHL1	false
9607	co	PCBD2 (co) HMMR	false
9608	co	PCBD2 (co) GINS1	false
9609	co	PCBD2 (co) SAPCD2	false
9610	co	ZDHHC4 (co) TMEM177	false
9611	co	ZDHHC4 (co) CHEK1	false
9612	co	ZDHHC4 (co) SYT15	false
9613	co	GRIPAP1 (co) PNPLA6	false
9614	co	ZBTB41 (co) CCNA2	false
9615	co	ZBTB41 (co) TOR1AIP1	false
9616	co	ZBTB41 (co) RAB11FIP2	false
9617	co	ZBTB41 (co) SERINC1	false
9618	co	ZBTB41 (co) KIF11	false
9619	co	ZBTB41 (co) NEK7	false
9620	co	ZBTB41 (co) SACM1L	false
9621	co	CCHCR1 (co) RAD54L	false
9622	co	ATP1B1 (co) NECAB1	false
9623	co	CYSTM1 (co) DUOX1	false
9624	co	CYSTM1 (co) TNFSF13	false
9625	co	EID1 (co) LGR4	false
9626	co	MPC1 (co) RAPGEF4	false
9627	co	IMMT (co) FXYD1	false
9628	co	IMMT (co) SAPCD2	false
9629	co	ATP6V1D (co) MMRN2	false
9630	co	ATP6V1D (co) ERG	false
9631	co	ATP6V1D (co) TIE1	false
9632	co	ATP6V1D (co) PEAR1	false
9633	co	PRR12 (co) SMAD6	false
9634	co	WASH4P (co) PNPLA6	false
9635	co	CLNS1A (co) GINS1	false
9636	co	CLNS1A (co) CDC20	false
9637	co	CLNS1A (co) GINS2	false
9638	co	CLNS1A (co) MAD2L1	false
9639	co	GPI (co) BRIP1	false
9640	co	GPI (co) SAPCD2	false
9641	co	GPI (co) DEPDC1B	false
9642	co	GPI (co) E2F8	false
9643	co	GPI (co) EXO1	false
9644	co	SUN2 (co) CCNA2	false
9645	co	SUN2 (co) UBE2C	false
9646	co	SUN2 (co) CDC20	false
9647	co	SUN2 (co) GINS1	false
9648	co	BATF3 (co) CAT	false
9649	co	BATF3 (co) RTKN2	false
9650	co	RFX3 (co) RALGPS2	false
9651	co	RFX3 (co) SIX4	false
9652	co	TMEM185B (co) DONSON	false
9653	co	TMEM185B (co) PAICS	false
9654	co	TREM2 (co) SPTBN1	false
9655	co	TREM2 (co) C1orf162	false
9656	co	TREM2 (co) VSIG4	false
9657	co	SLC8B1 (co) PNPLA6	false
9658	co	CIB2 (co) DENND2A	false
9659	co	MLLT4 (co) SPTBN1	false
9660	co	MLLT4 (co) CDKN3	false
9661	co	ZBTB22 (co) SLC25A10	false
9662	co	PDXK (co) CYYR1	false
9663	co	PDXK (co) FHL1	false
9664	co	TRAF1 (co) TNXB	false
9665	co	TRAF1 (co) STARD9	false
9666	co	TRAF1 (co) GSTM5	false
9667	co	CD109 (co) FBLN5	false
9668	co	CD109 (co) PRX	false
9669	co	SS18L1 (co) STARD9	false
9670	co	SS18L1 (co) DOCK4	false
9671	co	PLEKHB1 (co) SLC25A10	false
9672	co	R3HDM1 (co) CCNA2	false
9673	co	KNOP1 (co) ST6GALNAC4	false
9674	co	KNOP1 (co) ORC1	false
9675	co	KNOP1 (co) KIF11	false
9676	co	KNOP1 (co) CCNA2	false
9677	co	KNOP1 (co) CDC6	false
9678	co	PRKAR2A (co) PLAC9	false
9679	co	PRKAR2A (co) PAICS	false
9680	co	PRKAR2A (co) COX4I2	false
9681	co	PRKAR2A (co) PSAT1	false
9682	co	PRKAR2A (co) CLEC1A	false
9683	co	PRKAR2A (co) CCT3	false
9684	co	PRKAR2A (co) TIE1	false
9685	co	FAM217B (co) CAT	false
9686	co	PODXL2 (co) CDC20	false
9687	co	PODXL2 (co) KIF2C	false
9688	co	NUDT19 (co) SYT15	false
9689	co	NUDT19 (co) NLRC4	false
9690	co	C11orf83 (co) MVB12B	false
9691	co	C11orf83 (co) KDM5B	false
9692	co	GALNT6 (co) SPN	false
9693	co	GALNT6 (co) OSCAR	false
9694	co	KDM3A (co) IGSF10	false
9695	co	KDM3A (co) PYCR1	false
9696	co	KDM3A (co) NME1	false
9697	co	FA2H (co) CDH5	false
9698	co	FA2H (co) SAPCD2	false
9699	co	FA2H (co) TNXB	false
9700	co	FA2H (co) TIE1	false
9701	co	KLF10 (co) KIF11	false
9702	co	KLF10 (co) CCNA2	false
9703	co	KLF10 (co) CSRNP1	false
9704	co	GPR153 (co) TNXB	false
9705	co	GPR153 (co) PLAC9	false
9706	co	SLC27A5 (co) PAFAH1B3	false
9707	co	AKAP5 (co) CDC6	false
9708	co	AKAP5 (co) SAPCD2	false
9709	co	UQCRC1 (co) DONSON	false
9710	co	UQCRC1 (co) SAPCD2	false
9711	co	UQCRC1 (co) C16orf59	false
9712	co	ZNF98 (co) RPL24	false
9713	co	PLEKHA5 (co) RCC1	false
9714	co	CHST1 (co) NOVA2	false
9715	co	ZNF485 (co) CHEK1	false
9716	co	ZNF485 (co) AURKA	false
9717	co	ZNF485 (co) GINS1	false
9718	co	ZNF485 (co) TIMELESS	false
9719	co	ZNF485 (co) NLRC4	false
9720	co	ZNF485 (co) CDC6	false
9721	co	SAMD11 (co) CTHRC1	false
9722	co	ZCCHC8 (co) SLC25A10	false
9723	co	PDE12 (co) KPNA2	false
9724	co	STAU2 (co) SLC25A10	false
9725	co	BOLA1 (co) KDM5B	false
9726	co	BOLA1 (co) ERO1L	false
9727	co	OPLAH (co) C1orf162	false
9728	co	OPLAH (co) SAPCD2	false
9729	co	OPLAH (co) CDC6	false
9730	co	OPLAH (co) CDC20	false
9731	co	OPLAH (co) AURKA	false
9732	co	OPLAH (co) TIE1	false
9733	co	OPLAH (co) JAM2	false
9734	co	ZNF195 (co) GINS1	false
9735	co	PHYH (co) SLC25A10	false
9736	co	GATAD2B (co) CLEC1A	false
9737	co	MBOAT2 (co) KIAA1462	false
9738	co	MBOAT2 (co) TIE1	false
9739	co	MBOAT2 (co) RCC1	false
9740	co	RNF217 (co) PAFAH1B3	false
9741	co	PTCD2 (co) CDC6	false
9742	co	PTCD2 (co) GINS1	false
9743	co	PTCD2 (co) SAPCD2	false
9744	co	WNT7A (co) ITLN2	false
9745	co	GUF1 (co) CDC6	false
9746	co	GUF1 (co) CDCA8	false
9747	co	GUF1 (co) NLRC4	false
9748	co	GUF1 (co) GINS1	false
9749	co	GUF1 (co) CHEK1	false
9750	co	ALKBH4 (co) SRPK1	false
9751	co	ALKBH4 (co) DONSON	false
9752	co	ALKBH4 (co) KDM5B	false
9753	co	ZNF205 (co) SMAD6	false
9754	co	BPHL (co) CDC20	false
9755	co	WFIKKN2 (co) INSM1	false
9756	co	MZT2A (co) NEK2	false
9757	co	ASCC3 (co) CDC6	false
9758	co	SLC15A3 (co) ZNF106	false
9759	co	SLC15A3 (co) IKBKE	false
9760	co	ATG2B (co) NME1	false
9761	co	ETFA (co) C16orf59	false
9762	co	ETFA (co) SAPCD2	false
9763	co	ETFA (co) GINS1	false
9764	co	CDC73 (co) BMPR2	false
9765	co	CDC73 (co) ANGPT1	false
9766	co	C11orf49 (co) LRRC46	false
9767	co	TPPP (co) CDCA5	false
9768	co	TPPP (co) AURKA	false
9769	co	TPPP (co) UBE2C	false
9770	co	TPPP (co) NCAPG	false
9771	co	TPPP (co) CDC20	false
9772	co	TPPP (co) CDC6	false
9773	co	TPPP (co) TNS1	false
9774	co	MEFV (co) KIF11	false
9775	co	LRPAP1 (co) CLEC1A	false
9776	co	ATP2C1 (co) HSD17B6	false
9777	co	AP3M1 (co) HMMR	false
9778	co	KLF7 (co) CD93	false
9779	co	KLF7 (co) PAFAH1B3	false
9780	co	KLF7 (co) MMRN2	false
9781	co	KLF7 (co) GRK5	false
9782	co	KLF7 (co) ERG	false
9783	co	UHRF1BP1L (co) SYNJ2	false
9784	co	UHRF1BP1L (co) SRPK1	false
9785	co	DCAF12 (co) GINS2	false
9786	co	DCAF12 (co) MYBL2	false
9787	co	DCAF12 (co) MELK	false
9788	co	DCAF12 (co) CDC6	false
9789	co	AP1B1 (co) PSAT1	false
9790	co	AP1B1 (co) MCM4	false
9791	co	AP1B1 (co) C16orf59	false
9792	co	TCEA1 (co) CFL2	false
9793	co	KIAA1217 (co) PYCR1	false
9794	co	KIAA1217 (co) NME1	false
9795	co	KIAA1217 (co) KIAA1462	false
9796	co	TMEM2 (co) S1PR1	false
9797	co	TMEM2 (co) ESAM	false
9798	co	TMEM2 (co) PRKCE	false
9799	co	TMEM2 (co) SRPK1	false
9800	co	KIAA1430 (co) PNPLA6	false
9801	co	TRAF3 (co) LRRC32	false
9802	co	TRAF3 (co) EZH2	false
9803	co	KPNA4 (co) PRKCE	false
9804	co	MAGI2 (co) UBE2C	false
9805	co	MAGI2 (co) CCNB1	false
9806	co	MAGI2 (co) CCNA2	false
9807	co	MAGI2 (co) CDC20	false
9808	co	MAGI2 (co) CDC6	false
9809	co	PEG10 (co) TIE1	false
9810	co	PEG10 (co) TNXB	false
9811	co	MYL6B (co) CDC20	false
9812	co	MYL6B (co) HELLS	false
9813	co	MYL6B (co) GINS1	false
9814	co	MYL6B (co) NEK2	false
9815	co	MYL6B (co) CCNA2	false
9816	co	MRPL20 (co) NME1	false
9817	co	UFC1 (co) NEK2	false
9818	co	UFC1 (co) DLC1	false
9819	co	CDKN1B (co) PYCR1	false
9820	co	GATM (co) GNG11	false
9821	co	RABGGTB (co) CCM2L	false
9822	co	OSMR (co) RTKN2	false
9823	co	OSMR (co) LRRC32	false
9824	co	TMEM205 (co) PAFAH1B3	false
9825	co	TMEM205 (co) NME1	false
9826	co	CRY1 (co) SRPK1	false
9827	co	CRY1 (co) DONSON	false
9828	co	CUL9 (co) PNPLA6	false
9829	co	TALDO1 (co) TNXB	false
9830	co	RAB12 (co) PAFAH1B3	false
9831	co	MOCS1 (co) MYBL2	false
9832	co	MOCS1 (co) CDC20	false
9833	co	MOCS1 (co) CDC6	false
9834	co	MOCS1 (co) GINS1	false
9835	co	MOCS1 (co) STIL	false
9836	co	MOCS1 (co) MCM4	false
9837	co	TNFRSF21 (co) NSUN5	false
9838	co	TNFRSF21 (co) SLIT3	false
9839	co	TNFRSF21 (co) ARHGEF19	false
9840	co	TNFRSF21 (co) COIL	false
9841	co	TNFRSF21 (co) ZEB2	false
9842	co	TNFRSF21 (co) BUB1B	false
9843	co	TNFRSF21 (co) KIF2C	false
9844	co	ZDHHC1 (co) PPAP2C	false
9845	co	PPARA (co) ZNF106	false
9846	co	ACOT1 (co) LRRC32	false
9847	co	ACOT1 (co) TIE1	false
9848	co	ACOT1 (co) STARD9	false
9849	co	ACOT1 (co) PDE1C	false
9850	co	ACOT1 (co) DOCK4	false
9851	co	ACOT1 (co) SLC25A10	false
9852	co	BLNK (co) STIL	false
9853	co	BLNK (co) GINS1	false
9854	co	BLNK (co) SAPCD2	false
9855	co	SGCE (co) MYBL2	false
9856	co	SGCE (co) CEP55	false
9857	co	SGCE (co) CCNB2	false
9858	co	SGCE (co) TK1	false
9859	co	SGCE (co) AURKA	false
9860	co	SGCE (co) PKMYT1	false
9861	co	SGCE (co) PTPN21	false
9862	co	SGCE (co) UBE2C	false
9863	co	SGCE (co) CDC6	false
9864	co	SGCE (co) CDCA8	false
9865	co	SGCE (co) SERINC1	false
9866	co	SGCE (co) CDCA5	false
9867	co	SGCE (co) NCAPH	false
9868	co	SGCE (co) AURKB	false
9869	co	SGCE (co) KIF2C	false
9870	co	SGCE (co) PLK1	false
9871	co	SGCE (co) CDC20	false
9872	co	PTPN11 (co) DPEP2	false
9873	co	GPR89A (co) KIF11	false
9874	co	GPR89A (co) NCAPG	false
9875	co	GPR89A (co) AURKA	false
9876	co	GPR89A (co) CDC6	false
9877	co	GPR89A (co) HIST1H2BD	false
9878	co	SLC25A6 (co) PAFAH1B3	false
9879	co	SLC25A6 (co) RCC1	false
9880	co	DHDH (co) RCC1	false
9881	co	WASL (co) ERG	false
9882	co	SH2D2A (co) SLC25A10	false
9883	co	PAXBP1 (co) EZH2	false
9884	co	CMYA5 (co) PAICS	false
9885	co	CMYA5 (co) PEAK1	false
9886	co	CMYA5 (co) CCT3	false
9887	co	PIGL (co) ARHGEF39	false
9888	co	IL4R (co) SRPK1	false
9889	co	DHRS4 (co) PSMG3	false
9890	co	ADRB1 (co) DEPDC1	false
9891	co	ADRB1 (co) KIF18B	false
9892	co	FHL2 (co) AATK	false
9893	co	FHL2 (co) LATS2	false
9894	co	PWP1 (co) SPATS2	false
9895	co	PWP1 (co) DONSON	false
9896	co	PODXL (co) ESAM	false
9897	co	PODXL (co) CDH5	false
9898	co	TMEM222 (co) SLC25A10	false
9899	co	ZDHHC12 (co) C16orf59	false
9900	co	ZDHHC12 (co) SAPCD2	false
9901	co	WDR81 (co) SLC25A10	false
9902	co	COX8A (co) SAPCD2	false
9903	co	COX8A (co) NME1	false
9904	co	ACTR3C (co) TNXB	false
9905	co	TRIM68 (co) C1orf112	false
9906	co	TRIM68 (co) CCNA2	false
9907	co	GRTP1 (co) C14orf132	false
9908	co	GRTP1 (co) PIP5K1B	false
9909	co	GRTP1 (co) SRPK1	false
9910	co	GRTP1 (co) METTL7A	false
9911	co	GRTP1 (co) FAP	false
9912	co	GRTP1 (co) SOX4	false
9913	co	GRTP1 (co) SYNJ2	false
9914	co	GRTP1 (co) SLC27A3	false
9915	co	GRTP1 (co) ATOH8	false
9916	co	GRTP1 (co) PGM2L1	false
9917	co	GRTP1 (co) DUOX1	false
9918	co	GNB2L1 (co) HAND1	false
9919	co	GON4L (co) DOCK4	false
9920	co	CLDN11 (co) CDC6	false
9921	co	CLDN11 (co) SPATS2	false
9922	co	CLDN11 (co) RAMP2	false
9923	co	AP003068.6 (co) CCNA2	false
9924	co	SIGLEC1 (co) DOCK4	false
9925	co	SIGLEC1 (co) RAPGEF4	false
9926	co	C17orf89 (co) NME1	false
9927	co	C17orf89 (co) GINS1	false
9928	co	TRAPPC1 (co) RCC1	false
9929	co	TRAPPC1 (co) SLC25A10	false
9930	co	TRAPPC1 (co) PAFAH1B3	false
9931	co	DBN1 (co) ZBTB47	false
9932	co	DBN1 (co) SYNPO	false
9933	co	DBN1 (co) DENND2A	false
9934	co	DBN1 (co) FLT4	false
9935	co	DBN1 (co) SLIT3	false
9936	co	VAMP5 (co) KANK3	false
9937	co	VAMP5 (co) GNG11	false
9938	co	BTG2 (co) CSRNP1	false
9939	co	MTFR1 (co) ZEB2	false
9940	co	MTFR1 (co) CCNA2	false
9941	co	MTFR1 (co) NEK7	false
9942	co	LYPLA1 (co) GINS1	false
9943	co	LYPLA1 (co) HMMR	false
9944	co	RAP2B (co) MELK	false
9945	co	RAP2B (co) CDC6	false
9946	co	RAP2B (co) MYBL2	false
9947	co	RAP2B (co) AURKA	false
9948	co	RAP2B (co) GINS1	false
9949	co	ABCA9 (co) EXO1	false
9950	co	GID8 (co) C17orf53	false
9951	co	GID8 (co) BUB1B	false
9952	co	TRMT12 (co) DONSON	false
9953	co	PRPF40B (co) NLN	false
9954	co	PRPF40B (co) DCAF13	false
9955	co	C7orf41 (co) NME1	false
9956	co	C7orf41 (co) TGFBR3	false
9957	co	DHRS4L2 (co) PAFAH1B3	false
9958	co	MS4A14 (co) PIP5K1B	false
9959	co	MS4A14 (co) KAT2A	false
9960	co	SEC61A2 (co) ZEB1	false
9961	co	SEC61A2 (co) RAPGEF4	false
9962	co	VMAC (co) ERO1L	false
9963	co	ATMIN (co) DONSON	false
9964	co	RAB8B (co) SLC27A3	false
9965	co	RAB8B (co) FHL1	false
9966	co	RAB8B (co) NEK2	false
9967	co	RAB8B (co) CDC20	false
9968	co	RAB8B (co) SAPCD2	false
9969	co	RAB8B (co) ZNF217	false
9970	co	RAB8B (co) AK1	false
9971	co	RAB8B (co) S1PR4	false
9972	co	C11orf1 (co) ESAM	false
9973	co	C11orf1 (co) SAPCD2	false
9974	co	C11orf1 (co) TNXB	false
9975	co	C11orf1 (co) CDH5	false
9976	co	DIABLO (co) AURKA	false
[truncated: 56,419 more rows]
