# Supplementary material
Source: publisher figshare collection journal article supplement (https://springernature.figshare.com/ndownloader/files/35041376)
Supplement: Supplementary file 1 [file 35041376 › CytoscapeSession-2021_06_28-02_05/tables/103-lung_rmMT.paf%2Dth0.00%2Dp1e%2D3%2Drsqr0.30%2Dfiltered%2Dth_ranked.Tissue%2Dunique_class.csGCN.txt/LOCAL_ATTRS-org.cytoscape.model.CyNetwork-103+default+network.cytable]

"CyCSV-Version","1"
"SUID","name","selected"
"java.lang.Long","java.lang.String","java.lang.Boolean"
"","",""
"103 default network",""
"103","lung_rmMT.paf-th0.00-p1e-3-rsqr0.30-filtered-th_ranked.Tissue-unique_class.csGCN.txt","false"
