# Supplementary material
Source: publisher figshare collection journal article supplement (https://springernature.figshare.com/ndownloader/files/35041376)
Supplement: Supplementary file 1 [file 35041376 › CytoscapeSession-2021_06_28-02_05/tables/103-lung_rmMT.paf%2Dth0.00%2Dp1e%2D3%2Drsqr0.30%2Dfiltered%2Dth_ranked.Tissue%2Dunique_class.csGCN.txt/LOCAL_ATTRS-org.cytoscape.model.CyNode-103+default+node.cytable]

CyCSV-Version	1
SUID	name	selected
java.lang.Long	java.lang.String	java.lang.Boolean
103 default node
113	BEX4	false
114	SMIM10	false
115	AKIRIN2	false
116	P2RY10	false
117	ACN9	false
118	CEACAM4	false
119	CCDC112	false
120	ADAM12	false
121	THOC6	false
122	NARS	false
123	BST1	false
124	SLC44A3	false
125	IP6K2	false
126	STK25	false
127	TBC1D20	false
128	UBE2I	false
129	PRKRIP1	false
130	GPN3	false
131	C21orf62	false
132	WDR24	false
133	RHPN1	false
134	CD14	false
135	GKAP1	false
136	PAM16	false
137	RPS6KB2	false
138	PIDD	false
139	U2AF1	false
140	MALSU1	false
141	SMIM15	false
142	LRRFIP2	false
143	ELN	false
144	SERHL2	false
145	APOOL	false
146	RFWD2	false
147	HOXD1	false
148	IRX5	false
149	PIP4K2A	false
150	CSNK1D	false
151	CYP2J2	false
152	FAM19A4	false
153	ZBTB38	false
154	POLR3A	false
155	GATAD1	false
156	HCCS	false
157	BLOC1S3	false
158	CDIPT	false
159	CYP3A5	false
160	NCDN	false
161	PFKFB3	false
162	RNF146	false
163	MEA1	false
164	SMURF1	false
165	MAP1LC3A	false
166	C5orf54	false
167	CLIC2	false
168	AP5Z1	false
169	MYH9	false
170	FAM168B	false
171	PIN1	false
172	KCNE1	false
173	SRSF2	false
174	REEP1	false
175	SPG21	false
176	UBE2D3	false
177	STARD4	false
178	DCAF15	false
179	FNTB	false
180	RUSC2	false
181	ESM1	false
182	CD80	false
183	NTM	false
184	ROCK2	false
185	COL14A1	false
186	GARNL3	false
187	MAGEH1	false
188	TRAM1L1	false
189	SLC38A2	false
190	SUZ12	false
191	TRPT1	false
192	TMEM8B	false
193	SCRN2	false
194	FAM83E	false
195	ING1	false
196	MKS1	false
197	POLG	false
198	KAT5	false
199	PCDHGA2	false
200	N4BP2	false
201	RGL1	false
202	RAC2	false
203	ZNF25	false
204	CDK19	false
205	EHD1	false
206	ZNF529	false
207	ADA	false
208	MKNK1	false
209	PAAF1	false
210	PCOLCE	false
211	SLFNL1	false
212	CLMP	false
213	FILIP1L	false
214	POLR3GL	false
215	APOBEC3D	false
216	TRIM2	false
217	RAB10	false
218	NINL	false
219	NFAT5	false
220	LSM1	false
221	CCL5	false
222	TAF5L	false
223	WDR6	false
224	ETNK1	false
225	C4orf32	false
226	PMS2	false
227	TNC	false
228	CRIP2	false
229	TMCC3	false
230	APLN	false
231	TMX2-CTNND1	false
232	RNF215	false
233	MAN2B1	false
234	FMN1	false
235	CREB1	false
236	FAM122C	false
237	NKD2	false
238	DDB1	false
239	SNX33	false
240	POLL	false
241	ANKRD12	false
242	AFF3	false
243	ABCG2	false
244	SLC20A1	false
245	GPR42	false
246	TBL3	false
247	MRPS21	false
248	WBP2	false
249	RPLP2	false
250	SIPA1L1	false
251	NNT	false
252	ZNF785	false
253	STK4	false
254	FAM156A	false
255	TNNI2	false
256	C17orf59	false
257	KCTD13	false
258	ACSL1	false
259	NCOA2	false
260	APOLD1	false
261	MYH11	false
262	CHRNB2	false
263	KLHDC2	false
264	ELL	false
265	PARP15	false
266	TMUB2	false
267	ARSB	false
268	CDC42BPG	false
269	EGLN2	false
270	FKBP8	false
271	LAPTM4A	false
272	OSBPL1A	false
273	AKTIP	false
274	PDE7B	false
275	ZNF385A	false
276	CTR9	false
277	TTYH2	false
278	CAB39	false
279	RAB38	false
280	RAB26	false
281	ABHD14A	false
282	ADNP2	false
283	KCND1	false
284	DHX57	false
285	TRAP1	false
286	TLR4	false
287	RPIA	false
288	SETDB1	false
289	SLC16A11	false
290	LSM2	false
291	ZNF793	false
292	MICU1	false
293	SPNS2	false
294	CTC-479C5.12	false
295	TFB1M	false
296	FCGRT	false
297	DCUN1D1	false
298	ZNF33A	false
299	ALDH1A1	false
300	CRK	false
301	CRYZL1	false
302	TBCEL	false
303	CAPG	false
304	RAB13	false
305	AIG1	false
306	FTO	false
307	C14orf93	false
308	PSMA7	false
309	SEMA3E	false
310	PLA2G4C	false
311	PCNP	false
312	RP11-192H23.4	false
313	ELL3	false
314	SPATC1L	false
315	TNKS	false
316	NT5DC3	false
317	NCS1	false
318	INSIG1	false
319	STRIP1	false
320	KLRD1	false
321	MAML3	false
322	GNS	false
323	SLC25A13	false
324	ATG16L1	false
325	ERLIN1	false
326	CREBRF	false
327	SHISA5	false
328	FAAH2	false
329	CCL11	false
330	PAG1	false
331	HDAC11	false
332	F3	false
333	CNIH1	false
334	PACSIN2	false
335	BAI3	false
336	FAM78A	false
337	PIGP	false
338	UBASH3B	false
339	DCLRE1B	false
340	ATL2	false
341	PDGFA	false
342	AGFG2	false
343	PCP4L1	false
344	DTX2	false
345	DTNA	false
346	DNAJC18	false
347	MCAT	false
348	IL17D	false
349	WDR43	false
350	MBD4	false
351	PGM1	false
352	R3HCC1	false
353	FES	false
354	SRRD	false
355	MARC2	false
356	LETM1	false
357	DOCK9	false
358	ZNF821	false
359	SH3BGRL	false
360	SDC2	false
361	RTEL1-TNFRSF6B	false
362	SMAD4	false
363	FAM132B	false
364	BLVRA	false
365	SPAG9	false
366	TMEM131	false
367	EBF1	false
368	KDM2A	false
369	STK32C	false
370	CDKN1A	false
371	SLC35B3	false
372	AMN	false
373	SNX22	false
374	ZCCHC9	false
375	ZNF408	false
376	CTGF	false
377	C17orf75	false
378	GJB2	false
379	CLCN4	false
380	ATP5C1	false
381	C15orf38-AP3S2	false
382	FCHSD2	false
383	PDE10A	false
384	BMPER	false
385	USP15	false
386	ERP44	false
387	BRPF3	false
388	INO80E	false
389	CSK	false
390	CCDC102A	false
391	PCF11	false
392	TRMT10A	false
393	GNAI1	false
394	EDN1	false
395	FRZB	false
396	NEK10	false
397	NME3	false
398	GPS1	false
399	ZNF75D	false
400	ATF3	false
401	UBOX5	false
402	PPP1R8	false
403	NDUFA10	false
404	TMEM19	false
405	KCNIP2	false
406	ZNF700	false
407	PPP4C	false
408	PNPLA7	false
409	C1orf174	false
410	ITIH3	false
411	GRIK4	false
412	APBA2	false
413	KBTBD7	false
414	SPDYE3	false
415	ZNF646	false
416	TSPAN17	false
417	GOLPH3	false
418	NDUFA13	false
419	C9orf3	false
420	TPST1	false
421	NDUFA9	false
422	MOB3A	false
423	SHPK	false
424	TOB1	false
425	FAM187A	false
426	DNASE1L1	false
427	USP40	false
428	POLRMT	false
429	PDP2	false
430	UBE2Q1	false
431	STRADA	false
432	NOXA1	false
433	IRF7	false
434	REM1	false
435	AGAP3	false
436	BCL7A	false
437	ZNF598	false
438	RASGRP2	false
439	BARD1	false
440	TYMP	false
441	METTL8	false
442	VEZF1	false
443	RNF7	false
444	PTPN22	false
445	TOP1MT	false
446	PHACTR4	false
447	NMD3	false
448	CD7	false
449	SRRM3	false
450	SIPA1L3	false
451	SH3GL3	false
452	PPP1R9B	false
453	COA3	false
454	SCML1	false
455	CLEC4A	false
456	MLPH	false
457	IL15	false
458	CTC-349C3.1	false
459	FAM53A	false
460	ZBED4	false
461	CAPZA2	false
462	EHMT1	false
463	FAM73B	false
464	USP19	false
465	LYPLAL1	false
466	ZNF521	false
467	SPG20	false
468	SNX4	false
469	CDV3	false
470	RDH11	false
471	AC069547.1	false
472	RAB3D	false
473	GLI4	false
474	IGSF8	false
475	ZNF469	false
476	ATOX1	false
477	ZFP36L1	false
478	PDGFD	false
479	STAG3	false
480	SLC6A20	false
481	C1orf27	false
482	GLDN	false
483	LIPA	false
484	RSG1	false
485	SRSF9	false
486	ZNF654	false
487	CD83	false
488	LRRC8C	false
489	BMS1	false
490	DLEU1	false
491	NFE2L3	false
492	LYAR	false
493	ANXA13	false
494	MTRF1	false
495	ID3	false
496	P2RX5	false
497	CAPN1	false
498	FAM175B	false
499	MAVS	false
500	VASH1	false
501	TP53BP1	false
502	STK3	false
503	NEDD4L	false
504	SETD6	false
505	ZNF354B	false
506	TMCO4	false
507	TFEC	false
508	NF2	false
509	ZFAND5	false
510	CACUL1	false
511	RXRA	false
512	PELO	false
513	CXXC1	false
514	BTG3	false
515	TRIM38	false
516	ANGPTL5	false
517	NOLC1	false
518	ZNF467	false
519	NFKBID	false
520	ANKRD36	false
521	UBA7	false
522	KLHL41	false
523	GOSR2	false
524	PSMB10	false
525	SMC3	false
526	TFAM	false
527	TMLHE	false
528	AGGF1	false
529	SNX1	false
530	PKNOX1	false
531	LONRF3	false
532	PLD2	false
533	TMIE	false
534	APOO	false
535	C16orf95	false
536	COL5A3	false
537	MTHFSD	false
538	THBS3	false
539	ZNF587B	false
540	ZNF135	false
541	SPRY2	false
542	OSBPL9	false
543	G6PC2	false
544	PKLR	false
545	LRRC43	false
546	EID3	false
547	TLK1	false
548	PDGFRA	false
549	ALAS1	false
550	MIF4GD	false
551	PPAPDC1B	false
552	NRAP	false
553	CRP	false
554	FAM124A	false
555	CTAGE5	false
556	SSH3	false
557	SETMAR	false
558	ELF3	false
559	SNAPIN	false
560	TBC1D14	false
561	IGF1	false
562	RP2	false
563	C11orf80	false
564	CAPN12	false
565	AL591479.1	false
566	GPR89B	false
567	SLC10A3	false
568	MATN3	false
569	FAM212B	false
570	RAB11FIP4	false
571	ARFGAP1	false
572	TCHP	false
573	DISC1	false
574	NADK	false
575	CLEC16A	false
576	PRUNE	false
577	PRR14	false
578	C4orf3	false
579	BRWD1	false
580	SF3B14	false
581	TFCP2	false
582	MARK4	false
583	CDK11A	false
584	SYP	false
585	ZFP1	false
586	OAZ3	false
587	PPM1K	false
588	SRP19	false
589	GORAB	false
590	DMD	false
591	UPRT	false
592	ORMDL3	false
593	SUPT5H	false
594	AKAP8L	false
595	EPHB4	false
596	FAM105B	false
597	ZFP62	false
598	STON2	false
599	ADCY6	false
600	PNPLA4	false
601	SSBP4	false
602	GCA	false
603	AKAP11	false
604	AES	false
605	YIPF6	false
606	KSR2	false
607	ZBTB46	false
608	GIPC2	false
609	GALNT1	false
610	SLC16A13	false
611	KLHL33	false
612	ELK1	false
613	TVP23B	false
614	EIF2B4	false
615	ARHGEF17	false
616	NDN	false
617	RARG	false
618	ZMYND19	false
619	TOR1AIP1	false
620	TTC30B	false
621	WDR74	false
622	RAB30	false
623	GAB2	false
624	SLC38A9	false
625	SEPP1	false
626	HIPK1	false
627	LRRC61	false
628	ZBTB8A	false
629	C4orf21	false
630	VTA1	false
631	ZNF575	false
632	HSPA13	false
633	ARHGAP9	false
634	TIPARP	false
635	C8orf76	false
636	ZC3HAV1L	false
637	SLC19A3	false
638	POLR2J	false
639	PASK	false
640	UVRAG	false
641	RIMS3	false
642	TGFB1	false
643	NTNG2	false
644	FAIM	false
645	CNFN	false
646	JPH2	false
647	HELB	false
648	KCNA6	false
649	CTU2	false
650	BNIP2	false
651	DUS4L	false
652	HDAC8	false
653	FGF13	false
654	ZNF460	false
655	TNFAIP2	false
656	TRAPPC3	false
657	UNC45A	false
658	PDCL3	false
659	SEPT5	false
660	PDXDC1	false
661	IDS	false
662	TMEM102	false
663	RPAP2	false
664	RP11-345J4.5	false
665	UAP1L1	false
666	P2RY8	false
667	ANKRD45	false
668	HMGN3	false
669	C10orf118	false
670	SPG7	false
671	MUTYH	false
672	TMEM108	false
673	ADAMTS1	false
674	ALDH2	false
675	DDX39B	false
676	DNM3	false
677	CCT6A	false
678	PDZRN3	false
679	KIAA1324	false
680	RAB40A	false
681	SH3RF1	false
682	MRPL47	false
683	THOC3	false
684	DHFRL1	false
685	CPNE7	false
686	KCNH2	false
687	SMG5	false
688	SEPT7	false
689	ZNF182	false
690	EMID1	false
691	TVP23A	false
692	PHF17	false
693	LGALS1	false
694	SLC29A4	false
695	CCDC47	false
696	COPS6	false
697	DNM1	false
698	ZDHHC24	false
699	AJUBA	false
700	CRYBG3	false
701	RGS14	false
702	PPP1R26	false
703	ATP6V1H	false
704	BOLA2	false
705	THG1L	false
706	C7orf50	false
707	DNAJB9	false
708	YY1	false
709	TTC1	false
710	CYB5R4	false
711	PLA2G6	false
712	ACTR2	false
713	NKRF	false
714	IFT140	false
715	FAM172A	false
716	PIP5K1A	false
717	PIH1D1	false
718	TTC17	false
719	GRIK3	false
720	CDAN1	false
721	ST6GALNAC1	false
722	GFM2	false
723	ZNF688	false
724	HK2	false
725	CCDC132	false
726	SHISA2	false
727	LPGAT1	false
728	C16orf72	false
729	HEXB	false
730	PRRC2A	false
731	VNN2	false
732	COQ4	false
733	PTX4	false
734	PLXNB2	false
735	HLX	false
736	CLCN7	false
737	OXLD1	false
738	UBE2F	false
739	KRT80	false
740	RHOT1	false
741	CCNI	false
742	BAI2	false
743	C11orf84	false
744	COL21A1	false
745	EMC1	false
746	THRAP3	false
747	CCDC115	false
748	BIRC3	false
749	ACTR8	false
750	REEP6	false
751	STX7	false
752	CLINT1	false
753	SAMD3	false
754	NDUFV2	false
755	MORF4L1	false
756	PITPNM1	false
757	CXorf57	false
758	NUS1	false
759	TFDP2	false
760	KLHL29	false
761	CCDC85A	false
762	ERCC6L	false
763	PECR	false
764	KCNAB2	false
765	GYG1	false
766	OASL	false
767	NTSR1	false
768	FAM89B	false
769	NAIF1	false
770	SRCRB4D	false
771	TMEM68	false
772	CLIC6	false
773	NT5C2	false
774	MPHOSPH10	false
775	CCM2	false
776	ICAM4	false
777	SGMS1	false
778	TEFM	false
779	TSPAN6	false
780	SPOPL	false
781	NAGA	false
782	RHBDL1	false
783	TNFRSF11A	false
784	LYSMD4	false
785	ARHGAP33	false
786	TTLL4	false
787	MAP3K1	false
788	BSCL2	false
789	ARID4A	false
790	CDK5RAP1	false
791	THOC2	false
792	CACNA1C	false
793	ZCCHC11	false
794	RNF181	false
795	CA11	false
796	SLC27A1	false
797	RNF213	false
798	ANTXR2	false
799	MKNK2	false
800	GCNT3	false
801	EMC6	false
802	RAC1	false
803	TLK2	false
804	MPHOSPH9	false
805	DEPDC7	false
806	ZMYND8	false
807	FKBP1B	false
808	ME2	false
809	DUSP28	false
810	GREB1	false
811	AC004381.6	false
812	DNAJC27	false
813	CARD8	false
814	MZT2B	false
815	PDCD5	false
816	TMEM252	false
817	FBXL18	false
818	C9orf142	false
819	AASS	false
820	FAT4	false
821	FBXW4	false
822	MIER1	false
823	ACADVL	false
824	ADAT1	false
825	TSC22D4	false
826	GSK3B	false
827	PHF11	false
828	COX15	false
829	CTSL	false
830	ALS2CL	false
831	RNASEH1	false
832	L3MBTL2	false
833	GTF2E2	false
834	PDGFB	false
835	FRAS1	false
836	C1orf122	false
837	ZNF774	false
838	MRPL49	false
839	SLC35D2	false
840	PPM1A	false
841	FAM89A	false
842	ARMCX5	false
843	RRN3	false
844	FNIP2	false
845	EXT1	false
846	RDH13	false
847	TMEM255B	false
848	DTX3	false
849	AP1S2	false
850	FN3K	false
851	RPL7L1	false
852	NFYA	false
853	BMP4	false
854	MORC3	false
855	ENOPH1	false
856	POR	false
857	UBE2L3	false
858	OGT	false
859	WDR83OS	false
860	DENND6A	false
861	TMTC4	false
862	ZSWIM4	false
863	TAF6L	false
864	RBBP6	false
865	SEPT9	false
866	STAG1	false
867	ZNF567	false
868	SOCS6	false
869	TTC33	false
870	ZNHIT1	false
871	CCDC97	false
872	MTFR1L	false
873	PCDHAC1	false
874	PIK3R1	false
875	CSNK2B	false
876	RBM39	false
877	BRD8	false
878	EFTUD2	false
879	PROS1	false
880	PCDHB16	false
881	PRR19	false
882	ACBD3	false
883	TTC27	false
884	ITPRIPL2	false
885	HCAR2	false
886	IVD	false
887	MYSM1	false
888	SLC35A2	false
889	C19orf53	false
890	SLBP	false
891	MBTPS2	false
892	PIAS3	false
893	SLCO4A1	false
894	VAMP4	false
895	HDAC4	false
896	STEAP1	false
897	DNAJB2	false
898	CNR1	false
899	TMEM80	false
900	SOX9	false
901	SYTL2	false
902	EPB41L4B	false
903	SLC37A3	false
904	ADCK1	false
905	FAM96A	false
906	ETFB	false
907	MIEF2	false
908	RARA	false
909	GLYCTK	false
910	TMEM220	false
911	GCC1	false
912	RPUSD4	false
913	CASC4	false
914	DCAF17	false
915	CCNJL	false
916	CDC42EP2	false
917	NT5DC1	false
918	MAPK8IP2	false
919	CYP2U1	false
920	SLC35F5	false
921	MINA	false
922	ZDHHC5	false
923	CCDC125	false
924	NOS3	false
925	SLC43A3	false
926	FUOM	false
927	DEDD	false
928	SLX1A	false
929	OBSL1	false
930	LGMN	false
931	HARS2	false
932	FBXO44	false
933	UROD	false
934	UBE3C	false
935	SOX18	false
936	DNAH7	false
937	BMX	false
938	CTPS2	false
939	CTBP2	false
940	RBCK1	false
941	AGO3	false
942	AKAP17A	false
943	S100A13	false
944	HNRNPH1	false
945	POLM	false
946	ATP2C2	false
947	IL1R2	false
948	FARP1	false
949	PCDHGA9	false
950	TRMT2A	false
951	KANK4	false
952	IRS1	false
953	MPC2	false
954	ADCYAP1R1	false
955	TMEM88	false
956	ATP6V1E1	false
957	IL7R	false
958	CS	false
959	ANKS6	false
960	UNK	false
961	GOPC	false
962	RNF170	false
963	CMTM8	false
964	HSPB11	false
965	DBNL	false
966	SLC41A2	false
967	PCDH18	false
968	ADAP2	false
969	USP2	false
970	TNRC18	false
971	C12orf5	false
972	ATG4B	false
973	TNFAIP6	false
974	COL25A1	false
975	CLEC4M	false
976	GTPBP3	false
977	MED19	false
978	PLGRKT	false
979	RABEPK	false
980	PHF20	false
981	ZNF451	false
982	DHRS7	false
983	TSHZ2	false
984	NAGK	false
985	BROX	false
986	SRP68	false
987	RQCD1	false
988	ZNF107	false
989	PCDHB7	false
990	DDX17	false
991	SETDB2	false
992	HLTF	false
993	ARMC10	false
994	GLA	false
995	TMEM35	false
996	TOLLIP	false
997	PCBD1	false
998	ATAT1	false
999	REXO4	false
1000	ZNF506	false
1001	CCDC142	false
1002	MR1	false
1003	SKIV2L	false
1004	CINP	false
1005	SPATA24	false
1006	SEC24C	false
1007	SERTAD4	false
1008	TMOD3	false
1009	BCOR	false
1010	TRIM11	false
1011	TK2	false
1012	SLC25A18	false
1013	TMEM161A	false
1014	TMEM62	false
1015	FBXO3	false
1016	FOSL2	false
1017	ZC3H12B	false
1018	EPB41	false
1019	DUS2	false
1020	SLC18B1	false
1021	SSH1	false
1022	ZNF75A	false
1023	GTF3C2	false
1024	WFDC1	false
1025	WDR27	false
1026	TNFRSF10A	false
1027	DNAJC4	false
1028	PPP1R15B	false
1029	TRIM44	false
1030	USP10	false
1031	MPST	false
1032	FAM222A	false
1033	C12orf68	false
1034	ITGB5	false
1035	MAPK6	false
1036	STK17B	false
1037	TAF9	false
1038	ACTG2	false
1039	MANSC1	false
1040	TTC4	false
1041	PAPPA	false
1042	GPRASP2	false
1043	ASB9	false
1044	HCFC1R1	false
1045	FAM110D	false
1046	ZNF37A	false
1047	SCAMP5	false
1048	TIA1	false
1049	CCNL1	false
1050	IST1	false
1051	IRS2	false
1052	TNIP2	false
1053	GSKIP	false
1054	SHC2	false
1055	METTL22	false
1056	UBE2O	false
1057	SMNDC1	false
1058	BID	false
1059	CTSO	false
1060	MECP2	false
1061	KPNB1	false
1062	HEPH	false
1063	RNFT2	false
1064	CLK1	false
1065	ZNF83	false
1066	DCP2	false
1067	CLK2	false
1068	POLR1A	false
1069	UBTF	false
1070	MCOLN3	false
1071	MRPS9	false
1072	AMACR	false
1073	SLC29A3	false
1074	C16orf86	false
1075	BVES	false
1076	UBXN11	false
1077	NAMPTL	false
1078	LRCH4	false
1079	C14orf142	false
1080	ZNF496	false
1081	HSH2D	false
1082	EBLN2	false
1083	ARPP19	false
1084	NR3C1	false
1085	NUFIP1	false
1086	ZFYVE21	false
1087	METTL18	false
1088	ARVCF	false
1089	MTMR3	false
1090	MRPS6	false
1091	TNPO3	false
1092	C1orf204	false
1093	CARD11	false
1094	ATP13A1	false
1095	RGN	false
1096	PCDHGA4	false
1097	ZNF79	false
1098	MTHFD1	false
1099	MAP1LC3C	false
1100	ANKRD40	false
1101	RTDR1	false
1102	ATPAF2	false
1103	PCTP	false
1104	ERVV-1	false
1105	PCDH1	false
1106	MAFK	false
1107	CLEC11A	false
1108	MT1M	false
1109	NR4A3	false
1110	BZW1	false
1111	PCIF1	false
1112	PPIC	false
1113	SCCPDH	false
1114	LRRC29	false
1115	UTP18	false
1116	USP3	false
1117	SIKE1	false
1118	PVRL3	false
1119	SIRPB2	false
1120	ZNF548	false
1121	ABCC4	false
1122	FAM20B	false
1123	DNASE1L3	false
1124	AC106876.2	false
1125	MROH6	false
1126	BTN3A1	false
1127	MBP	false
1128	TFG	false
1129	ITPR1	false
1130	CHD2	false
1131	FAHD2A	false
1132	SATB1	false
1133	ALDH1L2	false
1134	SSTR1	false
1135	ZNF576	false
1136	LSM11	false
1137	FAM177A1	false
1138	IL6R	false
1139	TNFAIP8L3	false
1140	WWP2	false
1141	NFIL3	false
1142	LEP	false
1143	ISOC1	false
1144	ASB16	false
1145	LSM10	false
1146	CTSK	false
1147	R3HDM2	false
1148	PPIB	false
1149	ANKRD13B	false
1150	ZBED2	false
1151	DALRD3	false
1152	STON1	false
1153	PLOD1	false
1154	ASCC2	false
1155	TARBP1	false
1156	LRPPRC	false
1157	DLD	false
1158	KANSL1L	false
1159	FBXO18	false
1160	EIF4EBP3	false
1161	RP11-286N22.8	false
1162	ARPC3	false
1163	PRKD3	false
1164	CYBA	false
1165	NUDT18	false
1166	ZNF136	false
1167	NUP188	false
1168	TELO2	false
1169	TRIM73	false
1170	PNISR	false
1171	TPST2	false
1172	MVB12A	false
1173	HACE1	false
1174	GPCPD1	false
1175	GLS	false
1176	NDUFAF6	false
1177	POLR3C	false
1178	DTNBP1	false
1179	CP	false
1180	WDR55	false
1181	UBQLN4	false
1182	HACL1	false
1183	PPP1R3E	false
1184	C22orf29	false
1185	HERPUD2	false
1186	BCAT1	false
1187	CCDC64	false
1188	ACOT13	false
1189	ARID5A	false
1190	KIAA0895L	false
1191	USF1	false
1192	LAMC3	false
1193	VMO1	false
1194	FOXO1	false
1195	WDR75	false
1196	SLC35B4	false
1197	RAMP1	false
1198	INTS1	false
1199	MGEA5	false
1200	SDC4	false
1201	HIST2H2BE	false
1202	FAM171A2	false
1203	CCAR1	false
1204	AP3M2	false
1205	RRBP1	false
1206	CTDSP1	false
1207	STK11	false
1208	RPS9	false
1209	MRC2	false
1210	GOLT1B	false
1211	LENG8	false
1212	RSAD2	false
1213	NAT14	false
1214	FBXO7	false
1215	PTPRO	false
1216	HSPA6	false
1217	C2orf15	false
1218	CRIPT	false
1219	BRAT1	false
1220	MEX3B	false
1221	LAYN	false
1222	AQP3	false
1223	BCORL1	false
1224	USP21	false
1225	KIF1A	false
1226	TP53BP2	false
1227	ADCK2	false
1228	SLC5A7	false
1229	RAD52	false
1230	CD276	false
1231	TMEM134	false
1232	FAM171A1	false
1233	SYT8	false
1234	C14orf2	false
1235	PIP5K1C	false
1236	DYNC1LI2	false
1237	SLC25A29	false
1238	ZSCAN20	false
1239	SERTAD1	false
1240	RAB11FIP2	false
1241	APOL2	false
1242	SPRTN	false
1243	SUGP1	false
1244	RPE	false
1245	PRICKLE1	false
1246	UCHL1	false
1247	INTS4	false
1248	TMEM81	false
1249	PPP2R5B	false
1250	ACAD9	false
1251	PAK4	false
1252	GNPAT	false
1253	COL11A1	false
1254	HRASLS5	false
1255	AVEN	false
1256	COPA	false
1257	FANCL	false
1258	COMMD3	false
1259	LILRB4	false
1260	VPS13D	false
1261	BRSK1	false
1262	C2CD2	false
1263	FAM118A	false
1264	VAMP8	false
1265	TADA2B	false
1266	ZNFX1	false
1267	SMAD7	false
1268	ADPGK	false
1269	NR2F1	false
1270	NCOA6	false
1271	ZBTB37	false
1272	BCL2	false
1273	TMEM106A	false
1274	LUC7L	false
1275	TMEM106B	false
1276	LSM14A	false
1277	SRSF5	false
1278	DZIP1L	false
1279	EMD	false
1280	CHRNB1	false
1281	LDHA	false
1282	CHAMP1	false
1283	RBP4	false
1284	CYCS	false
1285	WSB2	false
1286	TBC1D3F	false
1287	NUP210	false
1288	HIRA	false
1289	HPSE	false
1290	FYCO1	false
1291	SULT1A1	false
1292	TTF2	false
1293	SSPN	false
1294	C1GALT1C1	false
1295	TRIM69	false
1296	DEGS2	false
1297	ARHGAP28	false
1298	PLAGL2	false
1299	HRH1	false
1300	ATRN	false
1301	CCDC51	false
1302	SLC35E3	false
1303	PVR	false
1304	KLHL24	false
1305	KBTBD6	false
1306	P4HA3	false
1307	TMEM254	false
1308	CCNL2	false
1309	SEPT11	false
1310	SF3B4	false
1311	TIAF1	false
1312	SLC23A2	false
1313	GOLPH3L	false
1314	ABCC9	false
1315	SAMM50	false
1316	CSE1L	false
1317	SNRNP48	false
1318	IRGQ	false
1319	GTPBP2	false
1320	SDHB	false
1321	C5orf22	false
1322	PSMA1	false
1323	TBC1D24	false
1324	HSPA4	false
1325	VIMP	false
1326	TMEM241	false
1327	FAM155B	false
1328	GRIA1	false
1329	IFNGR1	false
1330	SH3BP5L	false
1331	SLC40A1	false
1332	MRPL14	false
1333	HSD3B7	false
1334	TRIP12	false
1335	ATP5S	false
1336	C18orf21	false
1337	MAPKAPK2	false
1338	SEMA4F	false
1339	NARFL	false
1340	KIAA1107	false
1341	PRKAR2B	false
1342	TOP1	false
1343	YBX1	false
1344	WDR48	false
1345	SRSF3	false
1346	CPEB3	false
1347	ARL6	false
1348	BTN2A1	false
1349	ZNF92	false
1350	FAM220A	false
1351	EPS8L2	false
1352	TLE4	false
1353	EPHX3	false
1354	CLDN7	false
1355	SCARF2	false
1356	LRP8	false
1357	JTB	false
1358	PTGES2	false
1359	FAF2	false
1360	POP1	false
1361	CPLX1	false
1362	MUT	false
1363	HSPB7	false
1364	MAZ	false
1365	HIPK2	false
1366	PRDM1	false
1367	SPATA5	false
1368	TBXA2R	false
1369	SHARPIN	false
1370	KBTBD2	false
1371	C11orf58	false
1372	MROH1	false
1373	MITF	false
1374	COX19	false
1375	APOB	false
1376	PRICKLE3	false
1377	ANGPT4	false
1378	PUS7	false
1379	IL18R1	false
1380	UBE2B	false
1381	PWWP2A	false
1382	RIMKLA	false
1383	GTF2IRD1	false
1384	FOXJ3	false
1385	PTPRG	false
1386	ASB6	false
1387	OTUD7B	false
1388	BICC1	false
1389	UBE4B	false
1390	RELL1	false
1391	DAD1	false
1392	CA5B	false
1393	SPRN	false
1394	LRRC37B	false
1395	NPRL3	false
1396	PPFIA4	false
1397	SIRPB1	false
1398	SLC26A2	false
1399	NENF	false
1400	PDCD6	false
1401	C16orf45	false
1402	NBEAL1	false
1403	KCNA4	false
1404	KTN1	false
1405	ZNF91	false
1406	REXO2	false
1407	TM6SF1	false
1408	LONP1	false
1409	PTH1R	false
1410	NOMO3	false
1411	DOPEY2	false
1412	ATP6V1E2	false
1413	LIAS	false
1414	NEURL4	false
1415	SUCLA2	false
1416	LRP5L	false
1417	CANT1	false
1418	SF3A2	false
1419	MRPS30	false
1420	GNL1	false
1421	PAPLN	false
1422	NXN	false
1423	RSL1D1	false
1424	ATP8A1	false
1425	MCOLN1	false
1426	PCGF2	false
1427	TMEM259	false
1428	PDK4	false
1429	TMED4	false
1430	NUDT3	false
1431	VPS9D1	false
1432	AASDH	false
1433	CAMK2D	false
1434	ACTL10	false
1435	GUCD1	false
1436	SAMD4A	false
1437	GTF2H4	false
1438	AMIGO1	false
1439	RNF125	false
1440	C4BPA	false
1441	CORO6	false
1442	ALG2	false
1443	ULK2	false
1444	HLA-F	false
1445	TMEM63A	false
1446	UBR2	false
1447	TSNARE1	false
1448	MTERF	false
1449	LUZP1	false
1450	ZNF443	false
1451	TSEN54	false
1452	ASPRV1	false
1453	WRAP53	false
1454	SLC44A1	false
1455	SLC35F6	false
1456	PTPN14	false
1457	MRPL38	false
1458	TOP3B	false
1459	CCDC74B	false
1460	FOXK1	false
1461	TMA7	false
1462	TTC14	false
1463	BACE2	false
1464	ZMIZ1	false
1465	CBLL1	false
1466	PLA2G16	false
1467	SRPX2	false
1468	RPN1	false
1469	LRRC6	false
1470	DUSP23	false
1471	B3GNT1	false
1472	DBF4	false
1473	CELSR2	false
1474	C6orf89	false
1475	ZNF93	false
1476	MORF4L2	false
1477	HIST1H2BJ	false
1478	FAM193B	false
1479	NFKB2	false
1480	NDUFB11	false
1481	OMG	false
1482	TBC1D9	false
1483	ZNF251	false
1484	SORL1	false
1485	IGDCC4	false
1486	WDR26	false
1487	RSPRY1	false
1488	IGFBP4	false
1489	IGFLR1	false
1490	HOXA7	false
1491	ATP8B2	false
1492	TUBG1	false
1493	EHD3	false
1494	ZFP41	false
1495	SRC	false
1496	COPS7B	false
1497	FAM189B	false
1498	PPM1F	false
1499	LCORL	false
1500	CHD1L	false
1501	UNC93B1	false
1502	DENND4B	false
1503	GPATCH3	false
1504	KLHL23	false
1505	NUP35	false
1506	PIAS1	false
1507	FAM211B	false
1508	THNSL2	false
1509	POLR3D	false
1510	TAF10	false
1511	HHIPL1	false
1512	POLK	false
1513	NUMA1	false
1514	SERPINB1	false
1515	SLC39A14	false
1516	CEP164	false
1517	CAPN5	false
1518	NUPL2	false
1519	METTL2B	false
1520	CRISPLD2	false
1521	NKIRAS2	false
1522	TMEM200A	false
1523	ZNF696	false
1524	GLRX2	false
1525	ACAA1	false
1526	NBR1	false
1527	MATN2	false
1528	NEDD9	false
1529	TOP2B	false
1530	SEC24B	false
1531	ARNTL2	false
1532	BCLAF1	false
1533	CHCHD4	false
1534	KCNG3	false
1535	SCAF4	false
1536	ADSS	false
1537	YME1L1	false
1538	SLC27A2	false
1539	JHDM1D	false
1540	MAP2	false
1541	PLSCR1	false
1542	BCAP29	false
1543	HSF2	false
1544	CENPT	false
1545	PRCD	false
1546	PDE7A	false
1547	PDHX	false
1548	SLMO2	false
1549	HDLBP	false
1550	PHIP	false
1551	LPIN2	false
1552	SLC35A1	false
1553	ANKRD22	false
1554	PRDM6	false
1555	SPATA20	false
1556	BLOC1S5	false
1557	C1orf106	false
1558	CARHSP1	false
1559	C15orf65	false
1560	NFIX	false
1561	MRC1L1	false
1562	SLC9A7	false
1563	C11orf21	false
1564	RNF126	false
1565	ERI2	false
1566	MFGE8	false
1567	PMPCA	false
1568	COL10A1	false
1569	EPHA3	false
1570	EML5	false
1571	TSHZ1	false
1572	AIFM2	false
1573	MINK1	false
1574	DOK4	false
1575	ARID5B	false
1576	ASPSCR1	false
1577	ELAC1	false
1578	HGS	false
1579	MIER3	false
1580	MAP4K2	false
1581	FASTKD2	false
1582	PTPN6	false
1583	RBM5	false
1584	ARHGEF40	false
1585	FAM126B	false
1586	DMPK	false
1587	NMBR	false
1588	RNASE13	false
1589	GDF15	false
1590	FAM63A	false
1591	SEMA6C	false
1592	PHYKPL	false
1593	NPIPB5	false
1594	NDUFS3	false
1595	B3GAT3	false
1596	OVGP1	false
1597	C19orf40	false
1598	CHTOP	false
1599	CHML	false
1600	AEBP2	false
1601	B3GNTL1	false
1602	ASNS	false
1603	ABCA10	false
1604	INSC	false
1605	SOCS7	false
1606	PPP3R1	false
1607	TTC21A	false
1608	ARL8B	false
1609	SERPINB6	false
1610	PLXDC1	false
1611	MAP3K11	false
1612	RYBP	false
1613	MTHFD2L	false
1614	ST3GAL4	false
1615	KCNQ2	false
1616	CIAO1	false
1617	DES	false
1618	WIPF3	false
1619	DLAT	false
1620	PUM1	false
1621	MRPL1	false
1622	PNP	false
1623	UBE2D4	false
1624	BIVM	false
1625	GNG12	false
1626	PTGFRN	false
1627	KLHDC1	false
1628	UAP1	false
1629	PID1	false
1630	ENDOD1	false
1631	PTPN2	false
1632	NOX4	false
1633	PXDN	false
1634	BCKDHB	false
1635	INPP5J	false
1636	SELRC1	false
1637	SIRT2	false
1638	TMEM54	false
1639	PYCR2	false
1640	RNMTL1	false
1641	HEY2	false
1642	GTF2A1	false
1643	ARRDC2	false
1644	CHRDL1	false
1645	NSMF	false
1646	PLEK	false
1647	THRSP	false
1648	MRPS2	false
1649	LINC00935	false
1650	CTB-129P6.11	false
1651	SYNDIG1	false
1652	BCL9	false
1653	MS4A8	false
1654	GJB7	false
1655	METTL21A	false
1656	ZNF181	false
1657	PIK3AP1	false
1658	DCAF5	false
1659	EIF2B5	false
1660	TMEM216	false
1661	ABHD6	false
1662	MRPL11	false
1663	ELMOD2	false
1664	MAFB	false
1665	MTMR2	false
1666	OGG1	false
1667	MAP3K2	false
1668	GRB2	false
1669	STIP1	false
1670	KLRK1	false
1671	UTP11L	false
1672	AMPD2	false
1673	FOSL1	false
1674	WDR45B	false
1675	USP14	false
1676	HIAT1	false
1677	CTDNEP1	false
1678	GPR160	false
1679	MED15	false
1680	TRAK2	false
1681	DPH7	false
1682	DCXR	false
1683	RPP38	false
1684	DOK3	false
1685	TCTA	false
1686	PLXDC2	false
1687	YIPF1	false
1688	GAS7	false
1689	PAFAH1B1	false
1690	DCTD	false
1691	LARP4	false
1692	BRICD5	false
1693	PLAGL1	false
1694	MRPS17	false
1695	SNAP47	false
1696	ASAH2B	false
1697	RPSAP58	false
1698	SPAG4	false
1699	MEN1	false
1700	IFNAR1	false
1701	NLRP1	false
1702	ZMAT5	false
1703	IL12RB1	false
1704	RNF144B	false
1705	NOA1	false
1706	PSMD9	false
1707	C7orf73	false
1708	ETV6	false
1709	PPARGC1B	false
1710	TESPA1	false
1711	SHANK2	false
1712	FAM117B	false
1713	RNF166	false
1714	CSNK1G2	false
1715	MAPK13	false
1716	C12orf76	false
1717	SNRPB2	false
1718	XBP1	false
1719	CDK8	false
1720	OVOL2	false
1721	BTF3L4	false
1722	TRAPPC2L	false
1723	ZNF180	false
1724	HEXIM2	false
1725	HYI	false
1726	CXorf40B	false
1727	PRRG4	false
1728	SCG5	false
1729	GALNT16	false
1730	MPP5	false
1731	SHF	false
1732	USP13	false
1733	SLC22A18	false
1734	DLL1	false
1735	RTCA	false
1736	TMEM154	false
1737	PPA1	false
1738	PITPNM2	false
1739	CTTN	false
1740	ARHGEF18	false
1741	EIF3E	false
1742	IRF2	false
1743	TNRC6A	false
1744	RNF144A	false
1745	PLA2G7	false
1746	RPS19BP1	false
1747	C14orf79	false
1748	BAZ1B	false
1749	HNRNPLL	false
1750	VAMP3	false
1751	HSF4	false
1752	TYK2	false
1753	MLLT10	false
1754	PTTG2	false
1755	LCP2	false
1756	TPM4	false
1757	PPP1R2	false
1758	CFH	false
1759	FDXACB1	false
1760	LARS2	false
1761	ADAM15	false
1762	H3F3A	false
1763	FDX1	false
1764	LRCH3	false
1765	FASTKD3	false
1766	BTAF1	false
1767	IKZF5	false
1768	CALCOCO2	false
1769	GNA15	false
1770	MEX3D	false
1771	ACBD6	false
1772	RHOT2	false
1773	MFSD3	false
1774	RALGAPA1	false
1775	ZNF517	false
1776	RARS	false
1777	ANKRD27	false
1778	DDX49	false
1779	NCEH1	false
1780	SMCR8	false
1781	PMVK	false
1782	BET1	false
1783	TRIM45	false
1784	JMJD1C	false
1785	SLC4A1AP	false
1786	LCA5	false
1787	LRR1	false
1788	PPME1	false
1789	HIP1	false
1790	THAP11	false
1791	RNF149	false
1792	BCL2L12	false
1793	ANO2	false
1794	C7orf55-LUC7L2	false
1795	LRRC8D	false
1796	LDLRAD3	false
1797	TMEM71	false
1798	UTP20	false
1799	HBP1	false
1800	LGI2	false
1801	ADAMTS14	false
1802	SMIM1	false
1803	TADA3	false
1804	CYP2S1	false
1805	RTN4R	false
1806	FEM1B	false
1807	NIPSNAP3B	false
1808	HINFP	false
1809	TMEM261	false
1810	HIGD1A	false
1811	MMP14	false
1812	ZNF687	false
1813	RAPH1	false
1814	UBL4A	false
1815	LY9	false
1816	FKBPL	false
1817	PRKAA2	false
1818	ASAP1	false
1819	SURF1	false
1820	NUDT13	false
1821	SPAG16	false
1822	LRRC47	false
1823	ZDHHC16	false
1824	ACOT9	false
1825	NUBP2	false
1826	SOWAHC	false
1827	NDUFA8	false
1828	TMEM104	false
1829	GBP5	false
1830	VPS26B	false
1831	CERS2	false
1832	RUVBL2	false
1833	MITD1	false
1834	COL6A2	false
1835	AHR	false
1836	SNX15	false
1837	NHLRC1	false
1838	TTC13	false
1839	C20orf27	false
1840	AP3B1	false
1841	GALNT18	false
1842	PLXNB3	false
1843	CREB3L4	false
1844	B3GNT2	false
1845	CDC123	false
1846	TP53RK	false
1847	CYB561D1	false
1848	CNTNAP1	false
1849	ZNF532	false
1850	CEP70	false
1851	MDP1	false
1852	PALMD	false
1853	SLC39A4	false
1854	MAP3K7CL	false
1855	KIF20B	false
1856	EFHC1	false
1857	PHKG2	false
1858	TCEB2	false
1859	METTL21B	false
1860	BMP2	false
1861	SEMA3A	false
1862	XPOT	false
1863	MRPL28	false
1864	TXLNA	false
1865	MYCBPAP	false
1866	FAM26E	false
1867	BCR	false
1868	ASNA1	false
1869	RCOR3	false
1870	ACAD10	false
1871	ATG2A	false
1872	RPS6KB1	false
1873	PPP2R2D	false
1874	NUP98	false
1875	TIAM2	false
1876	EAF1	false
1877	ARHGEF5	false
1878	VSTM4	false
1879	EPHA4	false
1880	RP11-867G23.8	false
1881	RASSF6	false
1882	MTHFD1L	false
1883	GDPD1	false
1884	CSRP2	false
1885	TP53I13	false
1886	SAMD12	false
1887	SMARCC1	false
1888	CBX8	false
1889	MRPL23	false
1890	IFFO1	false
1891	NCL	false
1892	TXN2	false
1893	SOCS4	false
1894	CD72	false
1895	TBX21	false
1896	SIRPG	false
1897	G6PC3	false
1898	DPY30	false
1899	ZNF259	false
1900	UBE2Q2	false
1901	XPO4	false
1902	DAAM1	false
1903	UQCRC2	false
1904	PCDHGA5	false
1905	HERC1	false
1906	RRP1B	false
1907	GPR98	false
1908	TPM3	false
1909	CD46	false
1910	CORO7	false
1911	JUN	false
1912	CCDC28B	false
1913	XRCC5	false
1914	STK39	false
1915	C5orf63	false
1916	PAPD4	false
1917	WDFY1	false
1918	NFYB	false
1919	SYNE3	false
1920	SMTN	false
1921	XPO5	false
1922	UHMK1	false
1923	SH3BP2	false
1924	EIF4E2	false
1925	NXT1	false
1926	HEATR2	false
1927	SLC25A17	false
1928	RNASEH2B	false
1929	LSAMP	false
1930	KIAA1147	false
1931	PIK3C2B	false
1932	TRAF2	false
1933	POLD2	false
1934	COQ6	false
1935	CERS6	false
1936	TIRAP	false
1937	PPP2R5E	false
1938	TRUB1	false
1939	SMAD3	false
1940	ATP6AP1	false
1941	TEAD1	false
1942	SAMD5	false
1943	KCNAB1	false
1944	CCDC117	false
1945	CTSZ	false
1946	CIC	false
1947	C19orf52	false
1948	NCK2	false
1949	RGS11	false
1950	CXCL12	false
1951	NUP85	false
1952	PCDHAC2	false
1953	MSI2	false
1954	PPM1D	false
1955	KDELR3	false
1956	ARRDC4	false
1957	FBXL8	false
1958	DCP1A	false
1959	CLASP2	false
1960	SOX12	false
1961	POLR2M	false
1962	ZNF254	false
1963	ADAM28	false
1964	PYGO2	false
1965	PHLDB1	false
1966	COX10	false
1967	PCDHB12	false
1968	AZI1	false
1969	TRPV4	false
1970	RPS6KA4	false
1971	COL4A3BP	false
1972	UFSP1	false
1973	TSN	false
1974	PIEZO2	false
1975	MPEG1	false
1976	RGS22	false
1977	ATP2A2	false
1978	ENO4	false
1979	APBB2	false
1980	COL15A1	false
1981	CDC14B	false
1982	WDR52	false
1983	IL20RA	false
1984	NIPA1	false
1985	CCNI2	false
1986	CKLF	false
1987	KLHDC9	false
1988	PTOV1	false
1989	HARS	false
1990	GEM	false
1991	EPAS1	false
1992	KIF14	false
1993	ACAP1	false
1994	PAPSS1	false
1995	ANKIB1	false
1996	BASP1	false
1997	FCN1	false
1998	FBXO22	false
1999	PLEKHG1	false
2000	GGT1	false
2001	TSR3	false
2002	C5orf28	false
2003	TYSND1	false
2004	CDK20	false
2005	IQCC	false
2006	HAUS4	false
2007	WNK1	false
2008	SCYL2	false
2009	JUND	false
2010	RHOD	false
2011	KL	false
2012	KIAA1755	false
2013	C11orf70	false
2014	PHLPP2	false
2015	SHC1	false
2016	GPN2	false
2017	SNRNP40	false
2018	ZNF415	false
2019	ZFP3	false
2020	MORC2	false
2021	JAZF1	false
2022	PCBD2	false
2023	ZDHHC4	false
2024	AMD1	false
2025	GRIPAP1	false
2026	ZBTB41	false
2027	CCHCR1	false
2028	ZNF286A	false
2029	ATP1B1	false
2030	CYSTM1	false
2031	EID1	false
2032	MPC1	false
2033	IMMT	false
2034	ALDH16A1	false
2035	ATP6V1D	false
2036	STRA13	false
2037	PRR12	false
2038	WASH4P	false
2039	CLNS1A	false
2040	GPI	false
2041	SUN2	false
2042	BATF3	false
2043	RFX3	false
2044	TMEM185B	false
2045	TREM2	false
2046	SLC8B1	false
2047	CIB2	false
2048	MLLT4	false
2049	ZBTB22	false
2050	PDXK	false
2051	TRAF1	false
2052	CD109	false
2053	SS18L1	false
2054	PLEKHB1	false
2055	YARS	false
2056	R3HDM1	false
2057	KNOP1	false
2058	TMEM39B	false
2059	PRKAR2A	false
2060	FAM217B	false
2061	H2AFZ	false
2062	HOOK3	false
2063	PODXL2	false
2064	CD38	false
2065	NUDT19	false
2066	CERKL	false
2067	C11orf83	false
2068	IL18RAP	false
2069	GALNT6	false
2070	FOXF2	false
2071	UBE3A	false
2072	KDM3A	false
2073	NABP1	false
2074	PLAUR	false
2075	FA2H	false
2076	KLF10	false
2077	GPR153	false
2078	SMDT1	false
2079	SLC27A5	false
2080	AKAP5	false
2081	UQCRC1	false
2082	ZNF98	false
2083	RFXANK	false
2084	PLEKHA5	false
2085	CAMK2G	false
2086	CHST1	false
2087	ZNF485	false
2088	SAMD11	false
2089	C10orf137	false
2090	ZCCHC8	false
2091	BAIAP2	false
2092	PDE12	false
2093	STAU2	false
2094	PYY	false
2095	OTUB2	false
2096	BOLA1	false
2097	OPLAH	false
2098	ZNF195	false
2099	PHYH	false
2100	C3orf58	false
2101	GATAD2B	false
2102	XAF1	false
2103	SPSB3	false
2104	RHOBTB1	false
2105	DHX37	false
2106	EDEM3	false
2107	MBOAT2	false
2108	B4GALT5	false
[truncated: 5,872 more rows]
