# Supplementary material
Source: publisher figshare collection journal article supplement (https://springernature.figshare.com/ndownloader/files/35041376)
Supplement: Supplementary file 1 [file 35041376 › CytoscapeSession-2021_06_28-02_05/tables/66396-lung_GRN4GTEx_normal.txt/SHARED_ATTRS-org.cytoscape.model.CyEdge-66396+shared+edge.cytable]

CyCSV-Version	1
SUID	shared interaction	shared name
java.lang.Long	java.lang.String	java.lang.String
66396 shared edge
67989	GRN	ELK4 (GRN) ABCA3
67990	GRN	ELK4 (GRN) FMO5
67991	GRN	ELK4 (GRN) ZWINT
67992	GRN	ELK4 (GRN) PLA2G4F
67993	GRN	ELK4 (GRN) SNX25
67994	GRN	ELK4 (GRN) FAM111B
67995	GRN	ELK4 (GRN) CCNB1
67996	GRN	ELK4 (GRN) CCT3
67997	GRN	ELK4 (GRN) ALG1
67998	GRN	ELK4 (GRN) SLC52A2
67999	GRN	ELK4 (GRN) C16orf59
68000	GRN	ELK4 (GRN) MCM2
68001	GRN	ELK4 (GRN) VSIG4
68002	GRN	ELK4 (GRN) SLC25A10
68003	GRN	ELK4 (GRN) SAPCD2
68004	GRN	ELK4 (GRN) PDHB
68005	GRN	ELK4 (GRN) MPDU1
68006	GRN	ELK4 (GRN) TMEM163
68007	GRN	ELK4 (GRN) TIMELESS
68008	GRN	ELK4 (GRN) HMMR
68009	GRN	ELK4 (GRN) FITM2
68010	GRN	ELK4 (GRN) LRRK2
68011	GRN	ELK4 (GRN) GINS2
68012	GRN	ELK4 (GRN) TFB2M
68013	GRN	ELK4 (GRN) LYRM2
68014	GRN	ELK4 (GRN) MON1A
68015	GRN	ELK4 (GRN) SYT15
68016	GRN	ELK4 (GRN) TMEM177
68017	GRN	ELK4 (GRN) KIAA0101
68018	GRN	ELK4 (GRN) CYB561D2
68019	GRN	ELK4 (GRN) PTPN13
68020	GRN	ELK4 (GRN) MCM4
68021	GRN	ELK4 (GRN) MRPL3
68022	GRN	ELK4 (GRN) EPDR1
68023	GRN	ELK4 (GRN) SKA3
68024	GRN	ELK4 (GRN) EME1
68025	GRN	ELK4 (GRN) AIFM1
68026	GRN	ELK4 (GRN) OIP5
68027	GRN	ELK4 (GRN) AGPAT2
68028	GRN	ELK4 (GRN) AAR2
68029	GRN	ELK4 (GRN) FLAD1
68030	GRN	ELK4 (GRN) WDR12
68031	GRN	ELK4 (GRN) VPS18
68032	GRN	ELK4 (GRN) ALG3
68033	GRN	ELK4 (GRN) MARVELD3
68034	GRN	ELK4 (GRN) PCK2
68035	GRN	ELK4 (GRN) KCNK1
68036	GRN	ELK4 (GRN) MIS18A
68037	GRN	ELK4 (GRN) MEF2BNB
68038	GRN	ELK4 (GRN) FAM136A
68039	GRN	ELK4 (GRN) C21orf33
68040	GRN	ELK4 (GRN) TONSL
68041	GRN	ELK4 (GRN) B3GNT8
68042	GRN	ELK4 (GRN) NME6
68043	GRN	ELK4 (GRN) SLC38A7
68044	GRN	ELK4 (GRN) RNASE6
68045	GRN	ELK4 (GRN) FPR3
68046	GRN	ELK4 (GRN) DRAM1
68047	GRN	ELK4 (GRN) PRDX4
68048	GRN	ELK4 (GRN) DOLPP1
68049	GRN	ELK4 (GRN) MND1
68050	GRN	ELK4 (GRN) FAM203A
68051	GRN	ELK4 (GRN) TTC39A
68052	GRN	ELK4 (GRN) NUBP1
68053	GRN	ELK4 (GRN) PAFAH1B3
68054	GRN	ELK4 (GRN) ANKEF1
68055	GRN	ELK4 (GRN) S1PR4
68056	GRN	ELK4 (GRN) YIF1A
68057	GRN	ELK4 (GRN) TMED3
68058	GRN	ELK4 (GRN) CCDC71
68059	GRN	ELK4 (GRN) SLC39A8
68060	GRN	ELK4 (GRN) BDH1
68061	GRN	ELK4 (GRN) TRAIP
68062	GRN	ELK4 (GRN) APEH
68063	GRN	ELK4 (GRN) MANEAL
68064	GRN	ELK4 (GRN) SEC13
68065	GRN	ELK4 (GRN) C2
68066	GRN	ELK4 (GRN) GMPPA
68067	GRN	ELK4 (GRN) TMEM41A
68068	GRN	ELK4 (GRN) GSTA4
68069	GRN	ELK4 (GRN) MFSD2A
68070	GRN	ELK4 (GRN) BEX2
68071	GRN	ELK4 (GRN) DDOST
68072	GRN	ELK4 (GRN) FAM64A
68073	GRN	ELK4 (GRN) TMEM116
68074	GRN	ELK4 (GRN) SCAMP4
68075	GRN	ELK4 (GRN) APEX1
68076	GRN	ELK4 (GRN) GPR34
68077	GRN	ELK4 (GRN) MRM1
68078	GRN	ELK4 (GRN) HYOU1
68079	GRN	ELK4 (GRN) DPP3
68080	GRN	ELK4 (GRN) CAPN3
68081	GRN	ELK4 (GRN) COPZ1
68082	GRN	ELK4 (GRN) CHMP4C
68083	GRN	ELK4 (GRN) POLR2C
68084	GRN	ELK4 (GRN) SFXN4
68085	GRN	ELK4 (GRN) CCR1
68086	GRN	ELK4 (GRN) OCIAD2
68087	GRN	ELK4 (GRN) MUL1
68088	GRN	ELK4 (GRN) MRPS34
68089	GRN	ELK4 (GRN) AP1S1
68090	GRN	ELK4 (GRN) C1QBP
68091	GRN	ELK4 (GRN) LMAN2
68092	GRN	ELK4 (GRN) TMEM69
68093	GRN	ELK4 (GRN) SUOX
68094	GRN	ELK4 (GRN) DAP3
68095	GRN	ELK4 (GRN) CENPH
68096	GRN	ELK4 (GRN) SLC25A11
68097	GRN	ELK4 (GRN) LAIR1
68098	GRN	ELK4 (GRN) SAC3D1
68099	GRN	ELK4 (GRN) ATP5G3
68100	GRN	ELK4 (GRN) CLN6
68101	GRN	ELK4 (GRN) SLC46A1
68102	GRN	ELK4 (GRN) ACADS
68103	GRN	ELK4 (GRN) COPG1
68104	GRN	ELK4 (GRN) RNH1
68105	GRN	ELK4 (GRN) ERAL1
68106	GRN	ELK4 (GRN) CD33
68107	GRN	ELK4 (GRN) AKR1A1
68108	GRN	ELK4 (GRN) CD300LF
68109	GRN	ELK4 (GRN) PCNA
68110	GRN	ELK4 (GRN) FLRT3
68111	GRN	ELK4 (GRN) RENBP
68112	GRN	ELK4 (GRN) CSTF2
68113	GRN	ELK4 (GRN) SLC35B1
68114	GRN	ELK4 (GRN) RER1
68115	GRN	ELK4 (GRN) ILDR1
68116	GRN	ELK4 (GRN) GOT2
68117	GRN	ELK4 (GRN) PYCR1
68118	GRN	ELK4 (GRN) TMEM199
68119	GRN	ELK4 (GRN) FEM1A
68120	GRN	ELK4 (GRN) MID1IP1
68121	GRN	ELK4 (GRN) MLST8
68122	GRN	ELK4 (GRN) LSS
68123	GRN	ELK4 (GRN) MFAP3L
68124	GRN	ELK4 (GRN) PTCD1
68125	GRN	ELK4 (GRN) C19orf48
68126	GRN	ELK4 (GRN) FIGNL1
68127	GRN	ELK4 (GRN) PARP1
68128	GRN	ELK4 (GRN) CDK5
68129	GRN	ELK4 (GRN) LIMS2
68130	GRN	ELK4 (GRN) TIMM13
68131	GRN	ELK4 (GRN) CPSF3
68132	GRN	ELK4 (GRN) COQ9
68133	GRN	ELK4 (GRN) C3AR1
68134	GRN	ELK4 (GRN) THEM6
68135	GRN	ELK4 (GRN) C1orf85
68136	GRN	ELK4 (GRN) GBA
68137	GRN	ELK4 (GRN) NECAB1
68138	GRN	ELK4 (GRN) HYLS1
68139	GRN	ELK4 (GRN) ULK3
68140	GRN	ELK4 (GRN) DIEXF
68141	GRN	ELK4 (GRN) DNPH1
68142	GRN	ELK4 (GRN) SLC35C1
68143	GRN	ELK4 (GRN) BRI3
68144	GRN	ELK4 (GRN) CLEC14A
68145	GRN	ELK4 (GRN) KCNJ15
68146	GRN	ELK4 (GRN) SYS1
68147	GRN	ELK4 (GRN) SRD5A3
68148	GRN	ELK4 (GRN) CTSA
68149	GRN	ELK4 (GRN) METTL13
68150	GRN	ELK4 (GRN) PTAFR
68151	GRN	ELK4 (GRN) C9orf156
68152	GRN	ELK4 (GRN) ENC1
68153	GRN	ELK4 (GRN) GSTZ1
68154	GRN	ELK4 (GRN) MACROD2
68155	GRN	ELK4 (GRN) COPE
68156	GRN	ELK4 (GRN) FUT3
68157	GRN	ELK4 (GRN) THNSL1
68158	GRN	ELK4 (GRN) NAT10
68159	GRN	ELK4 (GRN) CNDP2
68160	GRN	ELK4 (GRN) RBM47
68161	GRN	ELK4 (GRN) NDC1
68162	GRN	ELK4 (GRN) TRIP13
68163	GRN	ELK4 (GRN) SLC35A4
68164	GRN	ELK4 (GRN) TFAP4
68165	GRN	ELK4 (GRN) TMEM79
68166	GRN	ELK4 (GRN) FAM173A
68167	GRN	ELK4 (GRN) COX5A
68168	GRN	ELK4 (GRN) LYL1
68169	GRN	ELK4 (GRN) FAM86A
68170	GRN	ELK4 (GRN) SNX17
68171	GRN	ELK4 (GRN) APOBR
68172	GRN	ELK4 (GRN) RGS19
68173	GRN	ELK4 (GRN) UMPS
68174	GRN	ELK4 (GRN) IRAK1
68175	GRN	ELK4 (GRN) DCTPP1
68176	GRN	ELK4 (GRN) EARS2
68177	GRN	ELK4 (GRN) TDRKH
68178	GRN	ELK4 (GRN) TSSC1
68179	GRN	ELK4 (GRN) MPV17
68180	GRN	ELK4 (GRN) MRPS33
68181	GRN	ELK4 (GRN) SLC5A6
68182	GRN	ELK4 (GRN) MRPL15
68183	GRN	ELK4 (GRN) PRAM1
68184	GRN	ELK4 (GRN) MYO7A
68185	GRN	ELK4 (GRN) DCAF13
68186	GRN	ELK4 (GRN) SF3B5
68187	GRN	ELK4 (GRN) FAM86C1
68188	GRN	ELK4 (GRN) MYD88
68189	GRN	ELK4 (GRN) CCDC167
68190	GRN	ELK4 (GRN) UROS
68191	GRN	ELK4 (GRN) NRGN
68192	GRN	ELK4 (GRN) SSBP1
68193	GRN	ELK4 (GRN) GPD1L
68194	GRN	ELK4 (GRN) TTLL12
68195	GRN	ELK4 (GRN) GNPDA1
68196	GRN	ELK4 (GRN) CCM2L
68197	GRN	ELK4 (GRN) C1orf53
68198	GRN	ELK4 (GRN) AP5S1
68199	GRN	ELK4 (GRN) MDH2
68200	GRN	ELK4 (GRN) RPP40
68201	GRN	ELK4 (GRN) ECHS1
68202	GRN	ELK4 (GRN) SELPLG
68203	GRN	ELK4 (GRN) MMACHC
68204	GRN	ELK4 (GRN) FCGR1B
68205	GRN	ELK4 (GRN) ITGB2
68206	GRN	ELK4 (GRN) SEC23B
68207	GRN	ELK4 (GRN) ADSL
68208	GRN	ELK4 (GRN) FUNDC1
68209	GRN	ELK4 (GRN) ABCB8
68210	GRN	ELK4 (GRN) DYX1C1
68211	GRN	ELK4 (GRN) TTI2
68212	GRN	ELK4 (GRN) SEPHS2
68213	GRN	ELK4 (GRN) EGFL7
68214	GRN	ELK4 (GRN) MTX2
68215	GRN	ELK4 (GRN) MRPS12
68216	GRN	ELK4 (GRN) GLB1
68217	GRN	ELK4 (GRN) FBXO41
68218	GRN	ELK4 (GRN) GPX1
68219	GRN	ELK4 (GRN) MRPS27
68220	GRN	ELK4 (GRN) ESRP2
68221	GRN	ELK4 (GRN) KDELR1
68222	GRN	ELK4 (GRN) DENR
68223	GRN	ELK4 (GRN) FOXRED1
68224	GRN	ELK4 (GRN) C1orf233
68225	GRN	ELK4 (GRN) COX6B1
68226	GRN	ELK4 (GRN) AARS2
68227	GRN	ELK4 (GRN) TLR8
68228	GRN	ELK4 (GRN) ITPA
68229	GRN	ELK4 (GRN) PREP
68230	GRN	ELK4 (GRN) APOA1BP
68231	GRN	ELK4 (GRN) ICT1
68232	GRN	ELK4 (GRN) SPRYD4
68233	GRN	ELK4 (GRN) TMEM223
68234	GRN	ELK4 (GRN) FGR
68235	GRN	ELK4 (GRN) SYK
68236	GRN	ELK4 (GRN) CYB5RL
68237	GRN	ELK4 (GRN) MS4A7
68238	GRN	ELK4 (GRN) PARS2
68239	GRN	ELK4 (GRN) SLC7A7
68240	GRN	ELK4 (GRN) POLR3K
68241	GRN	ELK4 (GRN) SNRPC
68242	GRN	ELK4 (GRN) ARMC6
68243	GRN	ELK4 (GRN) ZFYVE19
68244	GRN	ELK4 (GRN) COMMD9
68245	GRN	ELK4 (GRN) AIF1
68246	GRN	ELK4 (GRN) DUOX1
68247	GRN	ELK4 (GRN) TRAPPC1
68248	GRN	ELK4 (GRN) WDR81
68249	GRN	ELK4 (GRN) SPHK2
68250	GRN	ELK4 (GRN) IRX2
68251	GRN	ELK4 (GRN) TMEM222
68252	GRN	ELK4 (GRN) PPP1CA
68253	GRN	ELK4 (GRN) PET112
68254	GRN	ELK4 (GRN) MFSD5
68255	GRN	ELK4 (GRN) SSR1
68256	GRN	ELK4 (GRN) PRPF19
68257	GRN	ELK4 (GRN) NLE1
68258	GRN	ELK4 (GRN) AP1B1
68259	GRN	ELK4 (GRN) EXO5
68260	GRN	ELK4 (GRN) FARSA
68261	GRN	ELK4 (GRN) TOR4A
68262	GRN	ELK4 (GRN) UQCRC1
68263	GRN	ELK4 (GRN) MRPL44
68264	GRN	ELK4 (GRN) LEO1
68265	GRN	ELK4 (GRN) ARHGEF19
68266	GRN	ELK4 (GRN) BLOC1S4
68267	GRN	ELK4 (GRN) PREB
68268	GRN	ELK4 (GRN) RAN
68269	GRN	ELK4 (GRN) TREM2
68270	GRN	ELK4 (GRN) ABRACL
68271	GRN	ELK4 (GRN) PDCD2L
68272	GRN	ELK4 (GRN) ARPC1B
68273	GRN	ELK4 (GRN) WBSCR16
68274	GRN	ELK4 (GRN) EMILIN2
68275	GRN	ELK4 (GRN) DOK2
68276	GRN	ELK4 (GRN) ST3GAL5
68277	GRN	ELK4 (GRN) ISCA2
68278	GRN	ELK4 (GRN) TKT
68279	GRN	ELK4 (GRN) ARHGAP30
68280	GRN	ELK4 (GRN) YKT6
68281	GRN	ELK4 (GRN) SDC1
68282	GRN	ELK4 (GRN) TMEM92
68283	GRN	ELK4 (GRN) ATP13A2
68284	GRN	ELK4 (GRN) MECR
68285	GRN	ELK4 (GRN) VPS11
68286	GRN	ELK4 (GRN) PES1
68287	GRN	ELK4 (GRN) MRPL4
68288	GRN	ELK4 (GRN) C19orf59
68289	GRN	ELK4 (GRN) RRP1B
68290	GRN	ELK4 (GRN) SLC25A4
68291	GRN	ELK4 (GRN) NDUFA8
68292	GRN	ELK4 (GRN) TMEM261
68293	GRN	ELK4 (GRN) DAK
68294	GRN	ELK4 (GRN) MRPS23
68295	GRN	ELK4 (GRN) FTSJ2
68296	GRN	ELK4 (GRN) PCBD2
68297	GRN	ELK4 (GRN) PLIN5
68298	GRN	ELK4 (GRN) XYLB
68299	GRN	ELK4 (GRN) DERL2
68300	GRN	ELK4 (GRN) C9orf69
68301	GRN	ELK4 (GRN) GRB2
68302	GRN	ELK4 (GRN) L2HGDH
68303	GRN	ELK4 (GRN) MTG1
68304	GRN	ELK4 (GRN) RABEP2
68305	GRN	ELK4 (GRN) MILR1
68306	GRN	ELK4 (GRN) TSFM
68307	GRN	ELK4 (GRN) DLAT
68308	GRN	ELK4 (GRN) CIAO1
68309	GRN	ELK4 (GRN) HDHD3
68310	GRN	ELK4 (GRN) BLNK
68311	GRN	ELK4 (GRN) GIMAP6
68312	GRN	ELK4 (GRN) MMP28
68313	GRN	ELK4 (GRN) CISD2
68314	GRN	ELK4 (GRN) MPI
68315	GRN	ELK4 (GRN) PCCB
68316	GRN	ELK4 (GRN) NFS1
68317	GRN	ELK4 (GRN) FAH
68318	GRN	ELK4 (GRN) POLR3B
68319	GRN	ELK4 (GRN) LACTB2
68320	GRN	ELK4 (GRN) ASAH1
68321	GRN	ELK4 (GRN) LCMT1
68322	GRN	ELK4 (GRN) CUL7
68323	GRN	ELK4 (GRN) PSMC2
68324	GRN	ELK4 (GRN) SNUPN
68325	GRN	ELK4 (GRN) ADORA3
68326	GRN	ELK4 (GRN) CPT2
68327	GRN	ELK4 (GRN) ATPAF1
68328	GRN	ELK4 (GRN) IDH1
68329	GRN	ELK4 (GRN) DOK3
68330	GRN	ELK4 (GRN) HN1
68331	GRN	ELK4 (GRN) GTF3C6
68332	GRN	ELK4 (GRN) ZDHHC12
68333	GRN	ELK4 (GRN) RAB42
68334	GRN	ELK4 (GRN) SCAMP3
68335	GRN	ELK4 (GRN) PSMD8
68336	GRN	ELK4 (GRN) SLC39A3
68337	GRN	ELK4 (GRN) TMEM141
68338	GRN	ELK4 (GRN) AIMP2
68339	GRN	ELK4 (GRN) TBL2
68340	GRN	ELK4 (GRN) FAM103A1
68341	GRN	ELK4 (GRN) C1orf162
68342	GRN	ELK4 (GRN) MAP2K2
68343	GRN	ELK4 (GRN) C11orf1
68344	GRN	ELK4 (GRN) IMMT
68345	GRN	ELK4 (GRN) MS4A4A
68346	GRN	ELK4 (GRN) TACO1
68347	GRN	ELK4 (GRN) ST14
68348	GRN	ELK4 (GRN) ACBD6
68349	GRN	ELK4 (GRN) PTCD2
68350	GRN	ELK4 (GRN) DDX41
68351	GRN	ELK4 (GRN) THAP8
68352	GRN	ELK4 (GRN) BRMS1
68353	GRN	ELK4 (GRN) RCCD1
68354	GRN	ELK4 (GRN) RRAGA
68355	GRN	ELK4 (GRN) GJA5
68356	GRN	ELK4 (GRN) PRR19
68357	GRN	ELK4 (GRN) TAF6L
68358	GRN	ELK4 (GRN) VPS33A
68359	GRN	ELK4 (GRN) GEMIN7
68360	GRN	ELK4 (GRN) IGSF6
68361	GRN	ELK4 (GRN) NUDT19
68362	GRN	ELK4 (GRN) NIF3L1
68363	GRN	ELK4 (GRN) PYCRL
68364	GRN	ELK4 (GRN) PDF
68365	GRN	ELK4 (GRN) NCLN
68366	GRN	ELK4 (GRN) MRPS35
68367	GRN	ELK4 (GRN) CDC123
68368	GRN	ELK4 (GRN) SDCCAG3
68369	GRN	ELK4 (GRN) MRPL27
68370	GRN	ELK4 (GRN) FA2H
68371	GRN	ELK4 (GRN) TSR3
68372	GRN	ELK4 (GRN) CD163
68373	GRN	ELK4 (GRN) TBCC
68374	GRN	ELK4 (GRN) ASAH2B
68375	GRN	ELK4 (GRN) ITGAM
68376	GRN	ELK4 (GRN) TPD52L2
68377	GRN	ELK4 (GRN) BRAT1
68378	GRN	ELK4 (GRN) SLC25A15
68379	GRN	ELK4 (GRN) TMEM106A
68380	GRN	ELK4 (GRN) TBXAS1
68381	GRN	ELK4 (GRN) METTL1
68382	GRN	ELK4 (GRN) CCDC137
68383	GRN	ELK4 (GRN) TBRG4
68384	GRN	ELK4 (GRN) B3GNT7
68385	GRN	ELK4 (GRN) PSMG3
68386	GRN	ELK4 (GRN) NDUFS1
68387	GRN	ELK4 (GRN) MRPL36
68388	GRN	ELK4 (GRN) FAM173B
68389	GRN	ELK4 (GRN) CD180
68390	GRN	ELK4 (GRN) FASTKD3
68391	GRN	ELK4 (GRN) CENPBD1
68392	GRN	ELK4 (GRN) COX10
68393	GRN	ELK4 (GRN) C10orf2
68394	GRN	ELK4 (GRN) ADCK1
68395	GRN	ELK4 (GRN) RPS6KA4
68396	GRN	ELK4 (GRN) POLR1B
68397	GRN	ELK4 (GRN) GPAA1
68398	GRN	ELK4 (GRN) TARS2
68399	GRN	ELK4 (GRN) COQ2
68400	GRN	ELK4 (GRN) HYAL2
68401	GRN	ELK4 (GRN) MLYCD
68402	GRN	ELK4 (GRN) ZNF469
68403	GRN	ELK4 (GRN) JAGN1
68404	GRN	ELK4 (GRN) ZNF696
71733	GRN	ELF4 (GRN) ALG1
71734	GRN	ELF4 (GRN) VSIG4
71735	GRN	ELF4 (GRN) MCM2
71736	GRN	ELF4 (GRN) NLRC4
71737	GRN	ELF4 (GRN) ECE2
71738	GRN	ELF4 (GRN) SYT15
71739	GRN	ELF4 (GRN) LRRK2
71740	GRN	ELF4 (GRN) CYB561D2
71741	GRN	ELF4 (GRN) FAM64A
71742	GRN	ELF4 (GRN) AIFM1
71743	GRN	ELF4 (GRN) PKMYT1
71744	GRN	ELF4 (GRN) SNX30
71745	GRN	ELF4 (GRN) FLAD1
71746	GRN	ELF4 (GRN) WDR12
71747	GRN	ELF4 (GRN) FAM111B
71748	GRN	ELF4 (GRN) MIS18A
71749	GRN	ELF4 (GRN) MEF2BNB
71750	GRN	ELF4 (GRN) KIAA0101
71751	GRN	ELF4 (GRN) TONSL
71752	GRN	ELF4 (GRN) RNASE6
71753	GRN	ELF4 (GRN) PBK
71754	GRN	ELF4 (GRN) FPR3
71755	GRN	ELF4 (GRN) DRAM1
71756	GRN	ELF4 (GRN) FAM136A
71757	GRN	ELF4 (GRN) DOLPP1
71758	GRN	ELF4 (GRN) ALOX5AP
71759	GRN	ELF4 (GRN) NUBP1
71760	GRN	ELF4 (GRN) PAFAH1B3
71761	GRN	ELF4 (GRN) MANEAL
71762	GRN	ELF4 (GRN) C2
71763	GRN	ELF4 (GRN) SNF8
71764	GRN	ELF4 (GRN) PXMP4
71765	GRN	ELF4 (GRN) B9D2
71766	GRN	ELF4 (GRN) CAPN3
71767	GRN	ELF4 (GRN) TRAIP
71768	GRN	ELF4 (GRN) FITM2
71769	GRN	ELF4 (GRN) SLC25A11
71770	GRN	ELF4 (GRN) LAIR1
71771	GRN	ELF4 (GRN) SAC3D1
71772	GRN	ELF4 (GRN) POLDIP2
71773	GRN	ELF4 (GRN) DAP3
71774	GRN	ELF4 (GRN) RNH1
71775	GRN	ELF4 (GRN) PAQR4
71776	GRN	ELF4 (GRN) CD300LF
71777	GRN	ELF4 (GRN) ALG3
71778	GRN	ELF4 (GRN) RENBP
71779	GRN	ELF4 (GRN) CLN6
71780	GRN	ELF4 (GRN) MLST8
71781	GRN	ELF4 (GRN) TMED3
71782	GRN	ELF4 (GRN) DDOST
71783	GRN	ELF4 (GRN) RNASEH2A
71784	GRN	ELF4 (GRN) C19orf48
71785	GRN	ELF4 (GRN) CDK5
71786	GRN	ELF4 (GRN) C3AR1
71787	GRN	ELF4 (GRN) GBA
71788	GRN	ELF4 (GRN) SAPCD2
71789	GRN	ELF4 (GRN) NECAB1
71790	GRN	ELF4 (GRN) APEX1
71791	GRN	ELF4 (GRN) SLC35C1
71792	GRN	ELF4 (GRN) KCNJ15
71793	GRN	ELF4 (GRN) SLC39A8
71794	GRN	ELF4 (GRN) SYS1
71795	GRN	ELF4 (GRN) CTSA
71796	GRN	ELF4 (GRN) SLC38A7
71797	GRN	ELF4 (GRN) GSTZ1
71798	GRN	ELF4 (GRN) ACAT1
71799	GRN	ELF4 (GRN) CPSF3
71800	GRN	ELF4 (GRN) NDC1
71801	GRN	ELF4 (GRN) MPDU1
71802	GRN	ELF4 (GRN) TMEM79
71803	GRN	ELF4 (GRN) FAM173A
71804	GRN	ELF4 (GRN) ATP5G3
71805	GRN	ELF4 (GRN) LAMTOR2
71806	GRN	ELF4 (GRN) FUT3
71807	GRN	ELF4 (GRN) THNSL1
71808	GRN	ELF4 (GRN) APOBR
71809	GRN	ELF4 (GRN) RGS19
71810	GRN	ELF4 (GRN) AKR1A1
71811	GRN	ELF4 (GRN) UMPS
71812	GRN	ELF4 (GRN) PRDX4
71813	GRN	ELF4 (GRN) MPV17
71814	GRN	ELF4 (GRN) PRAM1
71815	GRN	ELF4 (GRN) FAM203A
71816	GRN	ELF4 (GRN) FAM86C1
71817	GRN	ELF4 (GRN) CSTF2
71818	GRN	ELF4 (GRN) MYD88
71819	GRN	ELF4 (GRN) EXOSC5
71820	GRN	ELF4 (GRN) METTL13
71821	GRN	ELF4 (GRN) FIGNL1
71822	GRN	ELF4 (GRN) HYLS1
71823	GRN	ELF4 (GRN) AP5S1
71824	GRN	ELF4 (GRN) ECHS1
71825	GRN	ELF4 (GRN) FAM86A
71826	GRN	ELF4 (GRN) SELPLG
71827	GRN	ELF4 (GRN) MMACHC
71828	GRN	ELF4 (GRN) TRIP13
71829	GRN	ELF4 (GRN) FCGR1B
71830	GRN	ELF4 (GRN) ITGB2
71831	GRN	ELF4 (GRN) ABCB8
71832	GRN	ELF4 (GRN) COX5A
71833	GRN	ELF4 (GRN) ATP6V1F
71834	GRN	ELF4 (GRN) C1QBP
71835	GRN	ELF4 (GRN) COQ9
71836	GRN	ELF4 (GRN) SRD5A1
71837	GRN	ELF4 (GRN) CENPH
71838	GRN	ELF4 (GRN) MRPS12
71839	GRN	ELF4 (GRN) LMAN2
71840	GRN	ELF4 (GRN) GPX1
71841	GRN	ELF4 (GRN) KCTD14
71842	GRN	ELF4 (GRN) MRPL15
71843	GRN	ELF4 (GRN) C5
71844	GRN	ELF4 (GRN) MRPS11
71845	GRN	ELF4 (GRN) TLR8
71846	GRN	ELF4 (GRN) LYL1
71847	GRN	ELF4 (GRN) TMEM223
71848	GRN	ELF4 (GRN) SYK
71849	GRN	ELF4 (GRN) ALDH4A1
71850	GRN	ELF4 (GRN) SNRPC
71851	GRN	ELF4 (GRN) ARMC6
71852	GRN	ELF4 (GRN) EDEM2
71853	GRN	ELF4 (GRN) DHRS4L2
71854	GRN	ELF4 (GRN) FBXO41
71855	GRN	ELF4 (GRN) C1orf53
71856	GRN	ELF4 (GRN) AIF1
71857	GRN	ELF4 (GRN) TRAPPC1
71858	GRN	ELF4 (GRN) SPHK2
71859	GRN	ELF4 (GRN) PET112
71860	GRN	ELF4 (GRN) MFSD5
71861	GRN	ELF4 (GRN) DCTPP1
71862	GRN	ELF4 (GRN) PRPF19
71863	GRN	ELF4 (GRN) CTNS
71864	GRN	ELF4 (GRN) NRGN
71865	GRN	ELF4 (GRN) IPO13
71866	GRN	ELF4 (GRN) NUDT19
71867	GRN	ELF4 (GRN) LEO1
71868	GRN	ELF4 (GRN) NME6
71869	GRN	ELF4 (GRN) BLOC1S4
71870	GRN	ELF4 (GRN) TREM2
71871	GRN	ELF4 (GRN) UROS
71872	GRN	ELF4 (GRN) TSSC1
71873	GRN	ELF4 (GRN) SLC46A1
71874	GRN	ELF4 (GRN) CCDC167
71875	GRN	ELF4 (GRN) WBSCR16
71876	GRN	ELF4 (GRN) ISCA2
71877	GRN	ELF4 (GRN) TKT
71878	GRN	ELF4 (GRN) RPP40
71879	GRN	ELF4 (GRN) ARPC1B
71880	GRN	ELF4 (GRN) TXN2
71881	GRN	ELF4 (GRN) GNPDA1
71882	GRN	ELF4 (GRN) EHMT2
71883	GRN	ELF4 (GRN) NDUFA8
71884	GRN	ELF4 (GRN) TMEM261
71885	GRN	ELF4 (GRN) APOA1BP
71886	GRN	ELF4 (GRN) FTSJ2
71887	GRN	ELF4 (GRN) COPG1
71888	GRN	ELF4 (GRN) PARP1
71889	GRN	ELF4 (GRN) GRB2
71890	GRN	ELF4 (GRN) L2HGDH
71891	GRN	ELF4 (GRN) MILR1
71892	GRN	ELF4 (GRN) NFS1
71893	GRN	ELF4 (GRN) STAC3
71894	GRN	ELF4 (GRN) LCMT1
71895	GRN	ELF4 (GRN) CUL7
71896	GRN	ELF4 (GRN) YKT6
71897	GRN	ELF4 (GRN) PREB
71898	GRN	ELF4 (GRN) SNUPN
71899	GRN	ELF4 (GRN) COPZ1
71900	GRN	ELF4 (GRN) ATPAF1
71901	GRN	ELF4 (GRN) DOK3
71902	GRN	ELF4 (GRN) XYLB
71903	GRN	ELF4 (GRN) STOML2
71904	GRN	ELF4 (GRN) MRS2
71905	GRN	ELF4 (GRN) EXO5
71906	GRN	ELF4 (GRN) ACAD10
71907	GRN	ELF4 (GRN) C1orf162
71908	GRN	ELF4 (GRN) EARS2
71909	GRN	ELF4 (GRN) ATP5F1
71910	GRN	ELF4 (GRN) IMMT
71911	GRN	ELF4 (GRN) MS4A4A
71912	GRN	ELF4 (GRN) JMJD4
71913	GRN	ELF4 (GRN) SPRYD7
71914	GRN	ELF4 (GRN) GLB1
71915	GRN	ELF4 (GRN) PTCD2
71916	GRN	ELF4 (GRN) HN1
71917	GRN	ELF4 (GRN) CD33
71918	GRN	ELF4 (GRN) BRI3
71919	GRN	ELF4 (GRN) SSR2
71920	GRN	ELF4 (GRN) UQCRC1
71921	GRN	ELF4 (GRN) THAP8
71922	GRN	ELF4 (GRN) ACP5
71923	GRN	ELF4 (GRN) RCCD1
71924	GRN	ELF4 (GRN) TACO1
71925	GRN	ELF4 (GRN) GJA5
71926	GRN	ELF4 (GRN) PRR19
71927	GRN	ELF4 (GRN) MPI
71928	GRN	ELF4 (GRN) TAF6L
71929	GRN	ELF4 (GRN) IGSF6
71930	GRN	ELF4 (GRN) FLRT3
71931	GRN	ELF4 (GRN) ABRACL
71932	GRN	ELF4 (GRN) PARS2
71933	GRN	ELF4 (GRN) PDF
71934	GRN	ELF4 (GRN) SEC13
71935	GRN	ELF4 (GRN) CCDC71
71936	GRN	ELF4 (GRN) SLC7A7
71937	GRN	ELF4 (GRN) EXOSC4
71938	GRN	ELF4 (GRN) SLC5A6
71939	GRN	ELF4 (GRN) SCAMP4
71940	GRN	ELF4 (GRN) TSR3
71941	GRN	ELF4 (GRN) PGAM5
71942	GRN	ELF4 (GRN) TBCC
71943	GRN	ELF4 (GRN) ITGAM
71944	GRN	ELF4 (GRN) BRAT1
71945	GRN	ELF4 (GRN) TBXAS1
71946	GRN	ELF4 (GRN) COX6B1
71947	GRN	ELF4 (GRN) GOT2
71948	GRN	ELF4 (GRN) DIEXF
71949	GRN	ELF4 (GRN) C9orf69
71950	GRN	ELF4 (GRN) MRPL36
71951	GRN	ELF4 (GRN) SSBP1
71952	GRN	ELF4 (GRN) FAM173B
71953	GRN	ELF4 (GRN) CENPBD1
71954	GRN	ELF4 (GRN) GTF3C6
71955	GRN	ELF4 (GRN) EXOSC1
71956	GRN	ELF4 (GRN) PARK7
71957	GRN	ELF4 (GRN) MTX2
71958	GRN	ELF4 (GRN) PSMG3
71959	GRN	ELF4 (GRN) MECR
71960	GRN	ELF4 (GRN) ADCK1
71961	GRN	ELF4 (GRN) RPS6KA4
71962	GRN	ELF4 (GRN) POLR1B
71963	GRN	ELF4 (GRN) GEMIN7
71964	GRN	ELF4 (GRN) MLYCD
71965	GRN	ELF4 (GRN) ZNF469
71966	GRN	ELF4 (GRN) TP53I3
71967	GRN	ELF4 (GRN) JAGN1
72765	GRN	ETV6 (GRN) C16orf59
72766	GRN	ETV6 (GRN) SLC25A10
72767	GRN	ETV6 (GRN) SAPCD2
72768	GRN	ETV6 (GRN) MCM2
72769	GRN	ETV6 (GRN) MPDU1
72770	GRN	ETV6 (GRN) ASF1B
72771	GRN	ETV6 (GRN) TIMELESS
72772	GRN	ETV6 (GRN) NLRC4
72773	GRN	ETV6 (GRN) MRPL3
72774	GRN	ETV6 (GRN) PDIA4
72775	GRN	ETV6 (GRN) LYRM2
72776	GRN	ETV6 (GRN) MON1A
72777	GRN	ETV6 (GRN) SYT15
72778	GRN	ETV6 (GRN) LRRK2
72779	GRN	ETV6 (GRN) ALG1
72780	GRN	ETV6 (GRN) CYB561D2
72781	GRN	ETV6 (GRN) FICD
72782	GRN	ETV6 (GRN) HM13
72783	GRN	ETV6 (GRN) PAK6
72784	GRN	ETV6 (GRN) FAM111B
72785	GRN	ETV6 (GRN) CENPI
72786	GRN	ETV6 (GRN) STT3A
72787	GRN	ETV6 (GRN) AIFM1
72788	GRN	ETV6 (GRN) ALG5
72789	GRN	ETV6 (GRN) SNX30
72790	GRN	ETV6 (GRN) AAR2
72791	GRN	ETV6 (GRN) TSPAN3
72792	GRN	ETV6 (GRN) FLAD1
72793	GRN	ETV6 (GRN) VPS18
72794	GRN	ETV6 (GRN) MIS18A
72795	GRN	ETV6 (GRN) MEF2BNB
72796	GRN	ETV6 (GRN) METTL7B
72797	GRN	ETV6 (GRN) C21orf33
72798	GRN	ETV6 (GRN) TONSL
72799	GRN	ETV6 (GRN) TP53I3
72800	GRN	ETV6 (GRN) RNASE6
72801	GRN	ETV6 (GRN) DDOST
72802	GRN	ETV6 (GRN) FPR3
72803	GRN	ETV6 (GRN) C14orf1
72804	GRN	ETV6 (GRN) DRAM1
72805	GRN	ETV6 (GRN) B9D2
72806	GRN	ETV6 (GRN) DOLPP1
72807	GRN	ETV6 (GRN) TTC39A
72808	GRN	ETV6 (GRN) NUBP1
72809	GRN	ETV6 (GRN) PAFAH1B3
72810	GRN	ETV6 (GRN) ANKEF1
72811	GRN	ETV6 (GRN) S1PR4
72812	GRN	ETV6 (GRN) BDH1
72813	GRN	ETV6 (GRN) APEH
72814	GRN	ETV6 (GRN) TRAIP
72815	GRN	ETV6 (GRN) C2
72816	GRN	ETV6 (GRN) AACS
72817	GRN	ETV6 (GRN) GSTA4
72818	GRN	ETV6 (GRN) SCAMP4
72819	GRN	ETV6 (GRN) GPR34
72820	GRN	ETV6 (GRN) SIRT7
72821	GRN	ETV6 (GRN) CAPN3
72822	GRN	ETV6 (GRN) FAM203A
72823	GRN	ETV6 (GRN) SLC27A4
72824	GRN	ETV6 (GRN) FITM2
72825	GRN	ETV6 (GRN) POLR2C
72826	GRN	ETV6 (GRN) MUL1
72827	GRN	ETV6 (GRN) TTPAL
72828	GRN	ETV6 (GRN) MRPS34
72829	GRN	ETV6 (GRN) LAIR1
72830	GRN	ETV6 (GRN) SAC3D1
72831	GRN	ETV6 (GRN) SLC1A4
72832	GRN	ETV6 (GRN) SLC46A1
72833	GRN	ETV6 (GRN) ACADS
72834	GRN	ETV6 (GRN) RNH1
72835	GRN	ETV6 (GRN) NSDHL
72836	GRN	ETV6 (GRN) PRDX4
72837	GRN	ETV6 (GRN) EPDR1
72838	GRN	ETV6 (GRN) DPP3
72839	GRN	ETV6 (GRN) CD33
72840	GRN	ETV6 (GRN) AKR1A1
72841	GRN	ETV6 (GRN) CD300LF
72842	GRN	ETV6 (GRN) ALG3
72843	GRN	ETV6 (GRN) RENBP
72844	GRN	ETV6 (GRN) CSTF2
72845	GRN	ETV6 (GRN) SLC35B1
72846	GRN	ETV6 (GRN) RER1
72847	GRN	ETV6 (GRN) COPG1
72848	GRN	ETV6 (GRN) FEM1A
72849	GRN	ETV6 (GRN) COPZ1
72850	GRN	ETV6 (GRN) CLN6
72851	GRN	ETV6 (GRN) TMEM69
72852	GRN	ETV6 (GRN) TMED3
72853	GRN	ETV6 (GRN) APEX1
72854	GRN	ETV6 (GRN) C19orf48
72855	GRN	ETV6 (GRN) PARK7
72856	GRN	ETV6 (GRN) SNX25
72857	GRN	ETV6 (GRN) CDK5
72858	GRN	ETV6 (GRN) LIMS2
72859	GRN	ETV6 (GRN) C19orf24
72860	GRN	ETV6 (GRN) C3AR1
72861	GRN	ETV6 (GRN) THEM6
72862	GRN	ETV6 (GRN) C1orf85
72863	GRN	ETV6 (GRN) GBA
72864	GRN	ETV6 (GRN) NECAB1
72865	GRN	ETV6 (GRN) SMIM4
72866	GRN	ETV6 (GRN) HYLS1
72867	GRN	ETV6 (GRN) DNPH1
72868	GRN	ETV6 (GRN) TSTA3
72869	GRN	ETV6 (GRN) SLC35C1
72870	GRN	ETV6 (GRN) KCNJ15
72871	GRN	ETV6 (GRN) FMO5
72872	GRN	ETV6 (GRN) SLC39A8
72873	GRN	ETV6 (GRN) SYS1
72874	GRN	ETV6 (GRN) SRD5A3
72875	GRN	ETV6 (GRN) CTSA
72876	GRN	ETV6 (GRN) ANAPC11
72877	GRN	ETV6 (GRN) METTL13
72878	GRN	ETV6 (GRN) PTAFR
72879	GRN	ETV6 (GRN) C9orf156
72880	GRN	ETV6 (GRN) ENC1
72881	GRN	ETV6 (GRN) SLC38A7
72882	GRN	ETV6 (GRN) GSTZ1
72883	GRN	ETV6 (GRN) ACAT1
72884	GRN	ETV6 (GRN) CPSF3
72885	GRN	ETV6 (GRN) C17orf62
72886	GRN	ETV6 (GRN) CENPH
72887	GRN	ETV6 (GRN) SLC35A4
72888	GRN	ETV6 (GRN) SFXN4
72889	GRN	ETV6 (GRN) TMEM79
72890	GRN	ETV6 (GRN) FAM173A
72891	GRN	ETV6 (GRN) MRPL13
72892	GRN	ETV6 (GRN) ATP5G3
72893	GRN	ETV6 (GRN) LAMTOR2
72894	GRN	ETV6 (GRN) LRRC20
72895	GRN	ETV6 (GRN) DHDDS
72896	GRN	ETV6 (GRN) FUT3
72897	GRN	ETV6 (GRN) THNSL1
72898	GRN	ETV6 (GRN) RGS19
72899	GRN	ETV6 (GRN) UMPS
72900	GRN	ETV6 (GRN) TMED1
72901	GRN	ETV6 (GRN) VSIG4
72902	GRN	ETV6 (GRN) UQCC2
72903	GRN	ETV6 (GRN) SLC5A6
72904	GRN	ETV6 (GRN) FAM86C1
72905	GRN	ETV6 (GRN) CHPF2
72906	GRN	ETV6 (GRN) MYD88
72907	GRN	ETV6 (GRN) FIGNL1
72908	GRN	ETV6 (GRN) UROS
72909	GRN	ETV6 (GRN) GPD1L
72910	GRN	ETV6 (GRN) FRAT1
72911	GRN	ETV6 (GRN) AP5S1
72912	GRN	ETV6 (GRN) ECHS1
72913	GRN	ETV6 (GRN) FADD
72914	GRN	ETV6 (GRN) CORO1A
72915	GRN	ETV6 (GRN) CHCHD1
72916	GRN	ETV6 (GRN) DIEXF
72917	GRN	ETV6 (GRN) NUDT5
72918	GRN	ETV6 (GRN) FAM86A
72919	GRN	ETV6 (GRN) SELPLG
72920	GRN	ETV6 (GRN) MMACHC
72921	GRN	ETV6 (GRN) CCDC167
72922	GRN	ETV6 (GRN) FCGR1B
72923	GRN	ETV6 (GRN) ITGB2
72924	GRN	ETV6 (GRN) BIN2
72925	GRN	ETV6 (GRN) ABCB8
72926	GRN	ETV6 (GRN) DYX1C1
72927	GRN	ETV6 (GRN) TTI2
72928	GRN	ETV6 (GRN) SEPHS2
72929	GRN	ETV6 (GRN) ITGAM
72930	GRN	ETV6 (GRN) C1QBP
72931	GRN	ETV6 (GRN) SPRYD7
72932	GRN	ETV6 (GRN) TACC3
72933	GRN	ETV6 (GRN) MRPS12
72934	GRN	ETV6 (GRN) GLB1
72935	GRN	ETV6 (GRN) LMAN2
72936	GRN	ETV6 (GRN) FBXO41
72937	GRN	ETV6 (GRN) GPX1
72938	GRN	ETV6 (GRN) MRPL35
72939	GRN	ETV6 (GRN) MRPL15
72940	GRN	ETV6 (GRN) C5
72941	GRN	ETV6 (GRN) AARS2
72942	GRN	ETV6 (GRN) MRPS11
72943	GRN	ETV6 (GRN) TLR8
72944	GRN	ETV6 (GRN) ITPA
72945	GRN	ETV6 (GRN) C16orf70
72946	GRN	ETV6 (GRN) SPRYD4
72947	GRN	ETV6 (GRN) TMEM223
72948	GRN	ETV6 (GRN) APOBR
72949	GRN	ETV6 (GRN) SYK
72950	GRN	ETV6 (GRN) CYB5RL
72951	GRN	ETV6 (GRN) ALDH4A1
72952	GRN	ETV6 (GRN) MS4A7
72953	GRN	ETV6 (GRN) SNRPC
72954	GRN	ETV6 (GRN) ARMC6
72955	GRN	ETV6 (GRN) B4GALT7
72956	GRN	ETV6 (GRN) PHB
72957	GRN	ETV6 (GRN) EDEM2
72958	GRN	ETV6 (GRN) C1orf53
72959	GRN	ETV6 (GRN) TRAPPC1
72960	GRN	ETV6 (GRN) WDR81
72961	GRN	ETV6 (GRN) SPHK2
72962	GRN	ETV6 (GRN) PET112
72963	GRN	ETV6 (GRN) MFSD5
72964	GRN	ETV6 (GRN) SSR2
72965	GRN	ETV6 (GRN) DCTPP1
72966	GRN	ETV6 (GRN) PRPF19
72967	GRN	ETV6 (GRN) ACOT1
72968	GRN	ETV6 (GRN) CTNS
72969	GRN	ETV6 (GRN) NLE1
72970	GRN	ETV6 (GRN) MYO1F
72971	GRN	ETV6 (GRN) IPO13
72972	GRN	ETV6 (GRN) APMAP
72973	GRN	ETV6 (GRN) LEO1
72974	GRN	ETV6 (GRN) NME6
72975	GRN	ETV6 (GRN) BLOC1S4
72976	GRN	ETV6 (GRN) SNRNP25
72977	GRN	ETV6 (GRN) TSSC1
72978	GRN	ETV6 (GRN) ARPC1B
72979	GRN	ETV6 (GRN) WBSCR16
72980	GRN	ETV6 (GRN) EMILIN2
72981	GRN	ETV6 (GRN) ISCA2
72982	GRN	ETV6 (GRN) ARHGAP30
72983	GRN	ETV6 (GRN) RPP40
72984	GRN	ETV6 (GRN) VPS11
72985	GRN	ETV6 (GRN) GNPDA1
72986	GRN	ETV6 (GRN) SLC25A4
72987	GRN	ETV6 (GRN) NDUFA8
72988	GRN	ETV6 (GRN) EBP
72989	GRN	ETV6 (GRN) FAM118B
72990	GRN	ETV6 (GRN) MTCH2
72991	GRN	ETV6 (GRN) FTSJ2
72992	GRN	ETV6 (GRN) GCDH
72993	GRN	ETV6 (GRN) ACAA2
72994	GRN	ETV6 (GRN) PCBD2
72995	GRN	ETV6 (GRN) PARP1
72996	GRN	ETV6 (GRN) ATP5F1
72997	GRN	ETV6 (GRN) PLIN5
72998	GRN	ETV6 (GRN) SLC37A4
72999	GRN	ETV6 (GRN) ADAP1
73000	GRN	ETV6 (GRN) TCTA
73001	GRN	ETV6 (GRN) GRB2
73002	GRN	ETV6 (GRN) L2HGDH
73003	GRN	ETV6 (GRN) RABEP2
73004	GRN	ETV6 (GRN) MILR1
73005	GRN	ETV6 (GRN) TSFM
73006	GRN	ETV6 (GRN) HDHD3
73007	GRN	ETV6 (GRN) SLX4
73008	GRN	ETV6 (GRN) TTLL12
73009	GRN	ETV6 (GRN) NFS1
73010	GRN	ETV6 (GRN) POLR3B
73011	GRN	ETV6 (GRN) KLHL12
73012	GRN	ETV6 (GRN) VPS25
73013	GRN	ETV6 (GRN) STAC3
73014	GRN	ETV6 (GRN) LCMT1
73015	GRN	ETV6 (GRN) CUL7
73016	GRN	ETV6 (GRN) YKT6
73017	GRN	ETV6 (GRN) PREB
73018	GRN	ETV6 (GRN) SNUPN
73019	GRN	ETV6 (GRN) ADORA3
73020	GRN	ETV6 (GRN) ATPAF1
73021	GRN	ETV6 (GRN) DOK3
73022	GRN	ETV6 (GRN) XYLB
73023	GRN	ETV6 (GRN) SSBP1
73024	GRN	ETV6 (GRN) ST3GAL5
73025	GRN	ETV6 (GRN) HN1
73026	GRN	ETV6 (GRN) GTF3C6
73027	GRN	ETV6 (GRN) STOML2
73028	GRN	ETV6 (GRN) PDCD2L
73029	GRN	ETV6 (GRN) RAB42
73030	GRN	ETV6 (GRN) INTS5
73031	GRN	ETV6 (GRN) FH
73032	GRN	ETV6 (GRN) EXO5
73033	GRN	ETV6 (GRN) DCAF13
73034	GRN	ETV6 (GRN) PTK6
73035	GRN	ETV6 (GRN) SLC25A20
73036	GRN	ETV6 (GRN) SDHC
73037	GRN	ETV6 (GRN) FARSA
73038	GRN	ETV6 (GRN) C1orf162
73039	GRN	ETV6 (GRN) C11orf1
73040	GRN	ETV6 (GRN) IMMT
73041	GRN	ETV6 (GRN) MS4A4A
73042	GRN	ETV6 (GRN) MRPS33
73043	GRN	ETV6 (GRN) AURKAIP1
73044	GRN	ETV6 (GRN) MRPL19
73045	GRN	ETV6 (GRN) PTCD2
73046	GRN	ETV6 (GRN) COA6
73047	GRN	ETV6 (GRN) LACTB2
73048	GRN	ETV6 (GRN) THAP8
73049	GRN	ETV6 (GRN) IRAK1
73050	GRN	ETV6 (GRN) GLYCTK
73051	GRN	ETV6 (GRN) RRAGA
73052	GRN	ETV6 (GRN) GJA5
73053	GRN	ETV6 (GRN) PRR19
73054	GRN	ETV6 (GRN) MPI
73055	GRN	ETV6 (GRN) TAF6L
73056	GRN	ETV6 (GRN) VPS33A
73057	GRN	ETV6 (GRN) TBCE
73058	GRN	ETV6 (GRN) IGSF6
73059	GRN	ETV6 (GRN) FLRT3
73060	GRN	ETV6 (GRN) ABRACL
73061	GRN	ETV6 (GRN) PARS2
73062	GRN	ETV6 (GRN) PYCRL
73063	GRN	ETV6 (GRN) PDF
73064	GRN	ETV6 (GRN) SLC7A7
73065	GRN	ETV6 (GRN) EXOSC4
73066	GRN	ETV6 (GRN) SDCCAG3
73067	GRN	ETV6 (GRN) FA2H
73068	GRN	ETV6 (GRN) ATP5H
73069	GRN	ETV6 (GRN) TSR3
73070	GRN	ETV6 (GRN) CCT5
73071	GRN	ETV6 (GRN) TBCC
73072	GRN	ETV6 (GRN) TTI1
73073	GRN	ETV6 (GRN) PGBD4
73074	GRN	ETV6 (GRN) METTL6
73075	GRN	ETV6 (GRN) SLC25A15
73076	GRN	ETV6 (GRN) TBXAS1
73077	GRN	ETV6 (GRN) GOT2
73078	GRN	ETV6 (GRN) B3GNT7
73079	GRN	ETV6 (GRN) MECR
73080	GRN	ETV6 (GRN) TDRKH
73081	GRN	ETV6 (GRN) MRPL36
73082	GRN	ETV6 (GRN) BRMS1
73083	GRN	ETV6 (GRN) FAM173B
73084	GRN	ETV6 (GRN) CD180
73085	GRN	ETV6 (GRN) CENPBD1
73086	GRN	ETV6 (GRN) EXOSC1
73087	GRN	ETV6 (GRN) C10orf2
73088	GRN	ETV6 (GRN) MTX2
73089	GRN	ETV6 (GRN) PSMG3
73090	GRN	ETV6 (GRN) ADCK1
73091	GRN	ETV6 (GRN) RPS6KA4
73092	GRN	ETV6 (GRN) POLR1B
73093	GRN	ETV6 (GRN) PCCB
73094	GRN	ETV6 (GRN) GMIP
73095	GRN	ETV6 (GRN) RPA3
73096	GRN	ETV6 (GRN) FOXRED1
73097	GRN	ETV6 (GRN) PSMD14
73098	GRN	ETV6 (GRN) GEMIN7
73099	GRN	ETV6 (GRN) MLYCD
73100	GRN	ETV6 (GRN) ZNF469
73101	GRN	ETV6 (GRN) JAGN1
73102	GRN	ETV6 (GRN) ZNF696
73103	GRN	ETV6 (GRN) INTS7
73602	GRN	GABPA (GRN) CDCA5
73603	GRN	GABPA (GRN) ABCA3
73604	GRN	GABPA (GRN) SLC22A3
73605	GRN	GABPA (GRN) TROAP
73606	GRN	GABPA (GRN) ZWINT
73607	GRN	GABPA (GRN) PLA2G4F
73608	GRN	GABPA (GRN) TFB2M
73609	GRN	GABPA (GRN) FAM111B
73610	GRN	GABPA (GRN) AURKA
73611	GRN	GABPA (GRN) CCT3
73612	GRN	GABPA (GRN) ALG1
73613	GRN	GABPA (GRN) DDOST
73614	GRN	GABPA (GRN) SLC52A2
73615	GRN	GABPA (GRN) C16orf59
73616	GRN	GABPA (GRN) MCM2
73617	GRN	GABPA (GRN) VSIG4
73618	GRN	GABPA (GRN) SAPCD2
73619	GRN	GABPA (GRN) PDHB
73620	GRN	GABPA (GRN) MPDU1
73621	GRN	GABPA (GRN) TIMELESS
73622	GRN	GABPA (GRN) FOXM1
73623	GRN	GABPA (GRN) HMMR
73624	GRN	GABPA (GRN) NLRC4
73625	GRN	GABPA (GRN) FITM2
73626	GRN	GABPA (GRN) CISD3
73627	GRN	GABPA (GRN) GINS2
73628	GRN	GABPA (GRN) LYRM2
73629	GRN	GABPA (GRN) MON1A
73630	GRN	GABPA (GRN) SYT15
73631	GRN	GABPA (GRN) LRRK2
73632	GRN	GABPA (GRN) MRPL3
73633	GRN	GABPA (GRN) TMEM177
73634	GRN	GABPA (GRN) KIAA0101
73635	GRN	GABPA (GRN) CYB561D2
73636	GRN	GABPA (GRN) MCM4
73637	GRN	GABPA (GRN) PTPN13
73638	GRN	GABPA (GRN) SKA3
73639	GRN	GABPA (GRN) EPDR1
73640	GRN	GABPA (GRN) RAD51
73641	GRN	GABPA (GRN) EME1
73642	GRN	GABPA (GRN) AIFM1
73643	GRN	GABPA (GRN) OIP5
73644	GRN	GABPA (GRN) SHMT2
73645	GRN	GABPA (GRN) TSPAN3
73646	GRN	GABPA (GRN) SLC22A31
73647	GRN	GABPA (GRN) RMI2
73648	GRN	GABPA (GRN) FLAD1
73649	GRN	GABPA (GRN) WDR12
73650	GRN	GABPA (GRN) SLC7A7
73651	GRN	GABPA (GRN) KCNK1
73652	GRN	GABPA (GRN) MIS18A
73653	GRN	GABPA (GRN) MEF2BNB
73654	GRN	GABPA (GRN) FAM136A
73655	GRN	GABPA (GRN) RILP
73656	GRN	GABPA (GRN) METTL7B
73657	GRN	GABPA (GRN) TONSL
73658	GRN	GABPA (GRN) NME6
73659	GRN	GABPA (GRN) RNASE6
73660	GRN	GABPA (GRN) FPR3
73661	GRN	GABPA (GRN) C2
73662	GRN	GABPA (GRN) DRAM1
73663	GRN	GABPA (GRN) DTYMK
73664	GRN	GABPA (GRN) MND1
73665	GRN	GABPA (GRN) FAM203A
73666	GRN	GABPA (GRN) NUBP1
73667	GRN	GABPA (GRN) PAFAH1B3
73668	GRN	GABPA (GRN) ANKEF1
73669	GRN	GABPA (GRN) S1PR4
73670	GRN	GABPA (GRN) YIF1A
73671	GRN	GABPA (GRN) PSAT1
73672	GRN	GABPA (GRN) SPC25
73673	GRN	GABPA (GRN) TMED3
73674	GRN	GABPA (GRN) SLC39A8
73675	GRN	GABPA (GRN) ZSWIM7
73676	GRN	GABPA (GRN) BDH1
73677	GRN	GABPA (GRN) MANEAL
73678	GRN	GABPA (GRN) HSD17B4
73679	GRN	GABPA (GRN) TRAIP
73680	GRN	GABPA (GRN) TMEM41A
73681	GRN	GABPA (GRN) FAM64A
73682	GRN	GABPA (GRN) LAMTOR1
73683	GRN	GABPA (GRN) APEX1
73684	GRN	GABPA (GRN) TTC39A
73685	GRN	GABPA (GRN) GPR34
73686	GRN	GABPA (GRN) HYOU1
73687	GRN	GABPA (GRN) CYB5A
73688	GRN	GABPA (GRN) CAPN3
73689	GRN	GABPA (GRN) MFSD2A
73690	GRN	GABPA (GRN) ACAT1
73691	GRN	GABPA (GRN) SLC27A4
73692	GRN	GABPA (GRN) COPZ1
73693	GRN	GABPA (GRN) CCR1
73694	GRN	GABPA (GRN) OCIAD2
73695	GRN	GABPA (GRN) MRPS34
73696	GRN	GABPA (GRN) AP1S1
73697	GRN	GABPA (GRN) C1orf162
73698	GRN	GABPA (GRN) TMEM69
73699	GRN	GABPA (GRN) DAP3
73700	GRN	GABPA (GRN) CENPH
73701	GRN	GABPA (GRN) SLC25A11
73702	GRN	GABPA (GRN) LAIR1
73703	GRN	GABPA (GRN) RNASEH2A
73704	GRN	GABPA (GRN) SAC3D1
73705	GRN	GABPA (GRN) POLDIP2
73706	GRN	GABPA (GRN) ATP5G3
73707	GRN	GABPA (GRN) CLN6
73708	GRN	GABPA (GRN) RNH1
73709	GRN	GABPA (GRN) NSDHL
73710	GRN	GABPA (GRN) SFXN4
73711	GRN	GABPA (GRN) COX5A
73712	GRN	GABPA (GRN) CD33
73713	GRN	GABPA (GRN) MRPL37
73714	GRN	GABPA (GRN) AKR1A1
73715	GRN	GABPA (GRN) CD300LF
73716	GRN	GABPA (GRN) SRD5A3
73717	GRN	GABPA (GRN) PCNA
73718	GRN	GABPA (GRN) GMPPA
73719	GRN	GABPA (GRN) ALG3
73720	GRN	GABPA (GRN) HK3
73721	GRN	GABPA (GRN) RENBP
73722	GRN	GABPA (GRN) NIPSNAP1
73723	GRN	GABPA (GRN) CSTF2
73724	GRN	GABPA (GRN) SLC35B1
73725	GRN	GABPA (GRN) RER1
73726	GRN	GABPA (GRN) ILDR1
73727	GRN	GABPA (GRN) TRUB2
73728	GRN	GABPA (GRN) GOT2
73729	GRN	GABPA (GRN) CPSF3
73730	GRN	GABPA (GRN) TMEM199
73731	GRN	GABPA (GRN) SGOL2
73732	GRN	GABPA (GRN) MLST8
73733	GRN	GABPA (GRN) MFAP3L
73734	GRN	GABPA (GRN) IDH1
73735	GRN	GABPA (GRN) C19orf48
73736	GRN	GABPA (GRN) FIGNL1
73737	GRN	GABPA (GRN) PARP1
73738	GRN	GABPA (GRN) PAQR4
73739	GRN	GABPA (GRN) SDHC
73740	GRN	GABPA (GRN) SLC37A4
73741	GRN	GABPA (GRN) CDK5
73742	GRN	GABPA (GRN) LAMTOR2
73743	GRN	GABPA (GRN) LIMS2
73744	GRN	GABPA (GRN) TIMM13
73745	GRN	GABPA (GRN) C19orf24
73746	GRN	GABPA (GRN) NSF
73747	GRN	GABPA (GRN) COQ9
73748	GRN	GABPA (GRN) C3AR1
73749	GRN	GABPA (GRN) THEM6
73750	GRN	GABPA (GRN) C1orf85
73751	GRN	GABPA (GRN) GBA
73752	GRN	GABPA (GRN) NECAB1
73753	GRN	GABPA (GRN) OSTC
73754	GRN	GABPA (GRN) HYLS1
73755	GRN	GABPA (GRN) ULK3
73756	GRN	GABPA (GRN) DIEXF
73757	GRN	GABPA (GRN) DNPH1
73758	GRN	GABPA (GRN) TSTA3
73759	GRN	GABPA (GRN) SLC35C1
73760	GRN	GABPA (GRN) CLEC14A
73761	GRN	GABPA (GRN) KCNJ15
73762	GRN	GABPA (GRN) SYS1
73763	GRN	GABPA (GRN) CTSA
73764	GRN	GABPA (GRN) RPUSD1
73765	GRN	GABPA (GRN) METTL13
73766	GRN	GABPA (GRN) ENC1
73767	GRN	GABPA (GRN) TACC3
73768	GRN	GABPA (GRN) SLC38A7
73769	GRN	GABPA (GRN) PSMG3
73770	GRN	GABPA (GRN) GSTZ1
73771	GRN	GABPA (GRN) FUT3
73772	GRN	GABPA (GRN) TMEM150B
73773	GRN	GABPA (GRN) THNSL1
73774	GRN	GABPA (GRN) SFXN2
73775	GRN	GABPA (GRN) NAT10
73776	GRN	GABPA (GRN) RBM47
73777	GRN	GABPA (GRN) C17orf62
73778	GRN	GABPA (GRN) SLC35A4
73779	GRN	GABPA (GRN) RAN
73780	GRN	GABPA (GRN) TFAP4
73781	GRN	GABPA (GRN) TMEM79
73782	GRN	GABPA (GRN) LYL1
73783	GRN	GABPA (GRN) TMEM164
73784	GRN	GABPA (GRN) MRPL13
73785	GRN	GABPA (GRN) FAM86A
73786	GRN	GABPA (GRN) DCAF13
73787	GRN	GABPA (GRN) BRI3BP
73788	GRN	GABPA (GRN) LRRC20
73789	GRN	GABPA (GRN) NUDT8
73790	GRN	GABPA (GRN) DHDDS
73791	GRN	GABPA (GRN) APOBR
73792	GRN	GABPA (GRN) RGS19
73793	GRN	GABPA (GRN) NUDT16L1
73794	GRN	GABPA (GRN) UMPS
73795	GRN	GABPA (GRN) PRDX4
73796	GRN	GABPA (GRN) IRAK1
73797	GRN	GABPA (GRN) PTAFR
73798	GRN	GABPA (GRN) DCPS
73799	GRN	GABPA (GRN) DCTPP1
73800	GRN	GABPA (GRN) TDRKH
73801	GRN	GABPA (GRN) MPV17
73802	GRN	GABPA (GRN) MRPS33
73803	GRN	GABPA (GRN) TMEM184A
73804	GRN	GABPA (GRN) SLC5A6
73805	GRN	GABPA (GRN) MRPL15
73806	GRN	GABPA (GRN) PRAM1
73807	GRN	GABPA (GRN) MYO7A
73808	GRN	GABPA (GRN) SRD5A1
73809	GRN	GABPA (GRN) MTCH2
73810	GRN	GABPA (GRN) SF3B5
73811	GRN	GABPA (GRN) APEH
73812	GRN	GABPA (GRN) FAM86C1
73813	GRN	GABPA (GRN) MYD88
73814	GRN	GABPA (GRN) CCDC167
73815	GRN	GABPA (GRN) RABIF
73816	GRN	GABPA (GRN) COPG1
73817	GRN	GABPA (GRN) NLN
73818	GRN	GABPA (GRN) FH
73819	GRN	GABPA (GRN) UROS
73820	GRN	GABPA (GRN) YIF1B
73821	GRN	GABPA (GRN) SSBP1
73822	GRN	GABPA (GRN) MRPL24
73823	GRN	GABPA (GRN) GPD1L
73824	GRN	GABPA (GRN) TTLL12
73825	GRN	GABPA (GRN) CCM2L
73826	GRN	GABPA (GRN) C1orf53
73827	GRN	GABPA (GRN) AP5S1
73828	GRN	GABPA (GRN) C21orf67
73829	GRN	GABPA (GRN) ECHS1
73830	GRN	GABPA (GRN) TMCO1
73831	GRN	GABPA (GRN) CORO1A
73832	GRN	GABPA (GRN) CHCHD1
73833	GRN	GABPA (GRN) PCK2
73834	GRN	GABPA (GRN) NUDT5
73835	GRN	GABPA (GRN) SELPLG
73836	GRN	GABPA (GRN) MMACHC
73837	GRN	GABPA (GRN) SSR2
73838	GRN	GABPA (GRN) HMBS
73839	GRN	GABPA (GRN) SIGLEC9
73840	GRN	GABPA (GRN) TSSC1
73841	GRN	GABPA (GRN) FCGR1B
73842	GRN	GABPA (GRN) ITGB2
73843	GRN	GABPA (GRN) SEC23B
73844	GRN	GABPA (GRN) BIN2
73845	GRN	GABPA (GRN) FUNDC1
73846	GRN	GABPA (GRN) ABCB8
73847	GRN	GABPA (GRN) TTI2
73848	GRN	GABPA (GRN) SEPHS2
73849	GRN	GABPA (GRN) EGFL7
73850	GRN	GABPA (GRN) ITGAM
73851	GRN	GABPA (GRN) MTX2
73852	GRN	GABPA (GRN) C1QBP
73853	GRN	GABPA (GRN) ZNF362
73854	GRN	GABPA (GRN) COG2
73855	GRN	GABPA (GRN) MRPS12
73856	GRN	GABPA (GRN) KLHL12
73857	GRN	GABPA (GRN) LMAN2
73858	GRN	GABPA (GRN) SEC13
73859	GRN	GABPA (GRN) FBXO41
73860	GRN	GABPA (GRN) GPX1
73861	GRN	GABPA (GRN) MRPS27
73862	GRN	GABPA (GRN) EARS2
73863	GRN	GABPA (GRN) DENR
73864	GRN	GABPA (GRN) FOXRED1
73865	GRN	GABPA (GRN) C1orf233
73866	GRN	GABPA (GRN) COX6B1
73867	GRN	GABPA (GRN) AARS2
73868	GRN	GABPA (GRN) MRPS11
73869	GRN	GABPA (GRN) TLR8
73870	GRN	GABPA (GRN) ITPA
73871	GRN	GABPA (GRN) SPRYD4
73872	GRN	GABPA (GRN) C16orf70
73873	GRN	GABPA (GRN) YKT6
73874	GRN	GABPA (GRN) RPP40
73875	GRN	GABPA (GRN) TMEM223
73876	GRN	GABPA (GRN) SYK
73877	GRN	GABPA (GRN) CYB5RL
73878	GRN	GABPA (GRN) ALDH4A1
73879	GRN	GABPA (GRN) MS4A7
73880	GRN	GABPA (GRN) POLR3K
73881	GRN	GABPA (GRN) MRS2
73882	GRN	GABPA (GRN) SNRPC
73883	GRN	GABPA (GRN) ARMC6
73884	GRN	GABPA (GRN) CD53
73885	GRN	GABPA (GRN) ZFYVE19
73886	GRN	GABPA (GRN) SORBS3
73887	GRN	GABPA (GRN) LYPLA1
73888	GRN	GABPA (GRN) RBBP4
73889	GRN	GABPA (GRN) AIF1
73890	GRN	GABPA (GRN) EHHADH
73891	GRN	GABPA (GRN) TMEM147
73892	GRN	GABPA (GRN) TRAPPC1
73893	GRN	GABPA (GRN) SPHK2
73894	GRN	GABPA (GRN) PPP1CA
73895	GRN	GABPA (GRN) PET112
73896	GRN	GABPA (GRN) MFSD5
73897	GRN	GABPA (GRN) PRPF19
73898	GRN	GABPA (GRN) PGLS
73899	GRN	GABPA (GRN) FERMT3
73900	GRN	GABPA (GRN) CTNS
73901	GRN	GABPA (GRN) NLE1
73902	GRN	GABPA (GRN) AP1B1
73903	GRN	GABPA (GRN) ICT1
73904	GRN	GABPA (GRN) MYO1F
73905	GRN	GABPA (GRN) NRGN
73906	GRN	GABPA (GRN) PUSL1
73907	GRN	GABPA (GRN) IPO13
73908	GRN	GABPA (GRN) ETFA
73909	GRN	GABPA (GRN) EXO5
73910	GRN	GABPA (GRN) APMAP
73911	GRN	GABPA (GRN) COA6
73912	GRN	GABPA (GRN) MEGF9
73913	GRN	GABPA (GRN) TOR4A
73914	GRN	GABPA (GRN) PHB
73915	GRN	GABPA (GRN) UQCRC1
73916	GRN	GABPA (GRN) MRPL44
73917	GRN	GABPA (GRN) NUDT19
73918	GRN	GABPA (GRN) LEO1
73919	GRN	GABPA (GRN) ARHGEF19
73920	GRN	GABPA (GRN) LACTB2
73921	GRN	GABPA (GRN) BLOC1S4
73922	GRN	GABPA (GRN) TREM2
73923	GRN	GABPA (GRN) ABRACL
73924	GRN	GABPA (GRN) HDHD3
73925	GRN	GABPA (GRN) SLC46A1
73926	GRN	GABPA (GRN) PGBD4
73927	GRN	GABPA (GRN) ARPC1B
73928	GRN	GABPA (GRN) WBSCR16
73929	GRN	GABPA (GRN) EMILIN2
73930	GRN	GABPA (GRN) SMUG1
73931	GRN	GABPA (GRN) DOK2
73932	GRN	GABPA (GRN) ST3GAL5
73933	GRN	GABPA (GRN) ISCA2
73934	GRN	GABPA (GRN) PREB
73935	GRN	GABPA (GRN) TKT
73936	GRN	GABPA (GRN) ARHGAP30
73937	GRN	GABPA (GRN) HDAC3
73938	GRN	GABPA (GRN) TMEM92
73939	GRN	GABPA (GRN) UQCRC2
73940	GRN	GABPA (GRN) ATP13A2
73941	GRN	GABPA (GRN) MECR
73942	GRN	GABPA (GRN) TXN2
73943	GRN	GABPA (GRN) GNPDA1
73944	GRN	GABPA (GRN) PARS2
73945	GRN	GABPA (GRN) MRPL4
73946	GRN	GABPA (GRN) C19orf59
73947	GRN	GABPA (GRN) EHMT2
73948	GRN	GABPA (GRN) VPS25
73949	GRN	GABPA (GRN) NDUFA8
73950	GRN	GABPA (GRN) TMEM261
73951	GRN	GABPA (GRN) DAK
73952	GRN	GABPA (GRN) RAP2B
73953	GRN	GABPA (GRN) MRPS23
73954	GRN	GABPA (GRN) FTSJ2
73955	GRN	GABPA (GRN) AGPAT2
73956	GRN	GABPA (GRN) FUT8
73957	GRN	GABPA (GRN) NEU1
73958	GRN	GABPA (GRN) PCBD2
73959	GRN	GABPA (GRN) XYLB
73960	GRN	GABPA (GRN) FARSA
73961	GRN	GABPA (GRN) ADAP1
73962	GRN	GABPA (GRN) SLC25A24
73963	GRN	GABPA (GRN) GRB2
73964	GRN	GABPA (GRN) L2HGDH
73965	GRN	GABPA (GRN) MTG1
73966	GRN	GABPA (GRN) RABEP2
73967	GRN	GABPA (GRN) MILR1
73968	GRN	GABPA (GRN) GSTA4
73969	GRN	GABPA (GRN) TSFM
73970	GRN	GABPA (GRN) CIAO1
73971	GRN	GABPA (GRN) ELMO3
73972	GRN	GABPA (GRN) BLNK
73973	GRN	GABPA (GRN) GIMAP6
73974	GRN	GABPA (GRN) CISD2
73975	GRN	GABPA (GRN) ASAH2B
73976	GRN	GABPA (GRN) SLX4
73977	GRN	GABPA (GRN) NFS1
73978	GRN	GABPA (GRN) POLR3B
73979	GRN	GABPA (GRN) SLAMF8
73980	GRN	GABPA (GRN) FAM103A1
73981	GRN	GABPA (GRN) CECR5
73982	GRN	GABPA (GRN) LCMT1
73983	GRN	GABPA (GRN) MFSD9
73984	GRN	GABPA (GRN) CUL7
73985	GRN	GABPA (GRN) PCCB
73986	GRN	GABPA (GRN) FASTK
73987	GRN	GABPA (GRN) PSMC2
73988	GRN	GABPA (GRN) SNAP47
73989	GRN	GABPA (GRN) SNUPN
73990	GRN	GABPA (GRN) ADORA3
73991	GRN	GABPA (GRN) CPT2
73992	GRN	GABPA (GRN) DOK3
73993	GRN	GABPA (GRN) POLR2D
73994	GRN	GABPA (GRN) DHRS7B
73995	GRN	GABPA (GRN) BRCC3
73996	GRN	GABPA (GRN) HN1
73997	GRN	GABPA (GRN) GTF3C6
73998	GRN	GABPA (GRN) STOML2
73999	GRN	GABPA (GRN) RAB42
74000	GRN	GABPA (GRN) C19orf40
74001	GRN	GABPA (GRN) PTK6
74002	GRN	GABPA (GRN) SLC25A20
74003	GRN	GABPA (GRN) TMEM141
74004	GRN	GABPA (GRN) TMEM144
74005	GRN	GABPA (GRN) AIMP2
74006	GRN	GABPA (GRN) ACAD10
74007	GRN	GABPA (GRN) MAP2K2
74008	GRN	GABPA (GRN) PGBD2
74009	GRN	GABPA (GRN) BTF3L4
74010	GRN	GABPA (GRN) MPI
74011	GRN	GABPA (GRN) C11orf1
74012	GRN	GABPA (GRN) CPOX
74013	GRN	GABPA (GRN) IMMT
74014	GRN	GABPA (GRN) MS4A4A
74015	GRN	GABPA (GRN) ST14
74016	GRN	GABPA (GRN) FLVCR2
74017	GRN	GABPA (GRN) GLB1
74018	GRN	GABPA (GRN) PTCD2
74019	GRN	GABPA (GRN) B3GNT8
74020	GRN	GABPA (GRN) MRPL27
74021	GRN	GABPA (GRN) BRI3
74022	GRN	GABPA (GRN) DDX41
74023	GRN	GABPA (GRN) THAP8
74024	GRN	GABPA (GRN) TMA16
74025	GRN	GABPA (GRN) BRMS1
74026	GRN	GABPA (GRN) GLYCTK
74027	GRN	GABPA (GRN) GJA5
74028	GRN	GABPA (GRN) PRR19
74029	GRN	GABPA (GRN) TAF6L
74030	GRN	GABPA (GRN) ZNF195
74031	GRN	GABPA (GRN) VPS33A
74032	GRN	GABPA (GRN) GEMIN7
74033	GRN	GABPA (GRN) TBCE
74034	GRN	GABPA (GRN) IGSF6
74035	GRN	GABPA (GRN) FLRT3
74036	GRN	GABPA (GRN) CLN3
74037	GRN	GABPA (GRN) PALB2
74038	GRN	GABPA (GRN) ARL1
74039	GRN	GABPA (GRN) NIF3L1
74040	GRN	GABPA (GRN) PYCRL
74041	GRN	GABPA (GRN) EIF2AK1
74042	GRN	GABPA (GRN) PDF
74043	GRN	GABPA (GRN) CCDC58
74044	GRN	GABPA (GRN) NDUFS1
74045	GRN	GABPA (GRN) PDCD6
74046	GRN	GABPA (GRN) CCDC71
74047	GRN	GABPA (GRN) HARBI1
74048	GRN	GABPA (GRN) CDC123
74049	GRN	GABPA (GRN) SDCCAG3
74050	GRN	GABPA (GRN) FA2H
74051	GRN	GABPA (GRN) PLIN5
74052	GRN	GABPA (GRN) SCAMP4
74053	GRN	GABPA (GRN) TSR3
74054	GRN	GABPA (GRN) GPAM
74055	GRN	GABPA (GRN) CHAF1A
74056	GRN	GABPA (GRN) HYAL1
74057	GRN	GABPA (GRN) TBCC
74058	GRN	GABPA (GRN) OPLAH
74059	GRN	GABPA (GRN) ZBTB9
74060	GRN	GABPA (GRN) DOPEY2
74061	GRN	GABPA (GRN) BRAT1
74062	GRN	GABPA (GRN) SLC25A15
74063	GRN	GABPA (GRN) TBXAS1
74064	GRN	GABPA (GRN) METTL1
74065	GRN	GABPA (GRN) CCDC137
74066	GRN	GABPA (GRN) TBRG4
74067	GRN	GABPA (GRN) DPEP2
74068	GRN	GABPA (GRN) C9orf69
74069	GRN	GABPA (GRN) PLEK2
74070	GRN	GABPA (GRN) TMEM45B
74071	GRN	GABPA (GRN) CCNL2
74072	GRN	GABPA (GRN) DECR2
74073	GRN	GABPA (GRN) FAM173B
74074	GRN	GABPA (GRN) CD180
74075	GRN	GABPA (GRN) LSM5
74076	GRN	GABPA (GRN) RP11-345J4.5
74077	GRN	GABPA (GRN) CENPBD1
74078	GRN	GABPA (GRN) CCR2
74079	GRN	GABPA (GRN) C5orf63
74080	GRN	GABPA (GRN) ACOT13
74081	GRN	GABPA (GRN) ADCK1
74082	GRN	GABPA (GRN) LSS
74083	GRN	GABPA (GRN) RPS6KA4
74084	GRN	GABPA (GRN) PIGO
74085	GRN	GABPA (GRN) POLR1B
74086	GRN	GABPA (GRN) GPAA1
74087	GRN	GABPA (GRN) TARS2
74088	GRN	GABPA (GRN) COQ2
74089	GRN	GABPA (GRN) PIN1
74090	GRN	GABPA (GRN) ZSWIM1
74091	GRN	GABPA (GRN) MLYCD
74092	GRN	GABPA (GRN) ZNF469
74093	GRN	GABPA (GRN) TP53I3
74094	GRN	GABPA (GRN) JAGN1
74095	GRN	GABPA (GRN) ZNF696
75098	GRN	NR2F2 (GRN) PDHB
75099	GRN	NR2F2 (GRN) MPDU1
75100	GRN	NR2F2 (GRN) KIF4A
75101	GRN	NR2F2 (GRN) LYRM2
75102	GRN	NR2F2 (GRN) ALG1
75103	GRN	NR2F2 (GRN) MIS18A
75104	GRN	NR2F2 (GRN) FAM64A
75105	GRN	NR2F2 (GRN) MRPL3
75106	GRN	NR2F2 (GRN) LIMS2
75107	GRN	NR2F2 (GRN) HYLS1
75108	GRN	NR2F2 (GRN) SPRYD7
75109	GRN	NR2F2 (GRN) NABP2
75110	GRN	NR2F2 (GRN) DIEXF
75111	GRN	NR2F2 (GRN) ZNF696
75163	GRN	NR2F6 (GRN) KIF4A
75164	GRN	NR2F6 (GRN) SKA1
75165	GRN	NR2F6 (GRN) TFB2M
75166	GRN	NR2F6 (GRN) PDHB
75167	GRN	NR2F6 (GRN) AURKA
75168	GRN	NR2F6 (GRN) FITM2
75169	GRN	NR2F6 (GRN) KIF20A
75170	GRN	NR2F6 (GRN) EPDR1
75171	GRN	NR2F6 (GRN) SKA3
75172	GRN	NR2F6 (GRN) MCM2
75173	GRN	NR2F6 (GRN) PXMP4
75174	GRN	NR2F6 (GRN) TIMELESS
75175	GRN	NR2F6 (GRN) MIS18A
75176	GRN	NR2F6 (GRN) OIP5
75177	GRN	NR2F6 (GRN) DTYMK
75178	GRN	NR2F6 (GRN) FAM64A
75179	GRN	NR2F6 (GRN) FAM203A
75180	GRN	NR2F6 (GRN) ACAT1
75181	GRN	NR2F6 (GRN) C16orf59
75182	GRN	NR2F6 (GRN) EME1
75183	GRN	NR2F6 (GRN) PSAT1
75184	GRN	NR2F6 (GRN) COX5A
75185	GRN	NR2F6 (GRN) SRD5A3
75186	GRN	NR2F6 (GRN) CSTF2
75187	GRN	NR2F6 (GRN) PCNA
75188	GRN	NR2F6 (GRN) FIBP
75189	GRN	NR2F6 (GRN) CPSF3
75190	GRN	NR2F6 (GRN) MON1A
75191	GRN	NR2F6 (GRN) IDH1
75192	GRN	NR2F6 (GRN) SLC39A11
75193	GRN	NR2F6 (GRN) PARK7
75194	GRN	NR2F6 (GRN) COQ9
75195	GRN	NR2F6 (GRN) CLN6
75196	GRN	NR2F6 (GRN) AP1S1
75197	GRN	NR2F6 (GRN) SLC38A7
75198	GRN	NR2F6 (GRN) PAQR4
75199	GRN	NR2F6 (GRN) MLST8
75200	GRN	NR2F6 (GRN) ALG1
75201	GRN	NR2F6 (GRN) MND1
75202	GRN	NR2F6 (GRN) BRI3BP
75203	GRN	NR2F6 (GRN) METTL13
75204	GRN	NR2F6 (GRN) MRPL37
75205	GRN	NR2F6 (GRN) NUP37
75206	GRN	NR2F6 (GRN) CNP
75207	GRN	NR2F6 (GRN) TACC3
75208	GRN	NR2F6 (GRN) GHITM
75209	GRN	NR2F6 (GRN) TMEM69
75210	GRN	NR2F6 (GRN) POLDIP2
75211	GRN	NR2F6 (GRN) MRPL15
75212	GRN	NR2F6 (GRN) HYLS1
75213	GRN	NR2F6 (GRN) ISOC2
75214	GRN	NR2F6 (GRN) NDC1
75215	GRN	NR2F6 (GRN) RABIF
75216	GRN	NR2F6 (GRN) COPG1
75217	GRN	NR2F6 (GRN) UROS
75218	GRN	NR2F6 (GRN) CDK5
75219	GRN	NR2F6 (GRN) CORO1A
75220	GRN	NR2F6 (GRN) CCDC167
75221	GRN	NR2F6 (GRN) RENBP
75222	GRN	NR2F6 (GRN) ATP6V1F
75223	GRN	NR2F6 (GRN) GPX1
75224	GRN	NR2F6 (GRN) NDUFAF1
75225	GRN	NR2F6 (GRN) HMMR
75226	GRN	NR2F6 (GRN) EDEM2
75227	GRN	NR2F6 (GRN) SSBP1
75228	GRN	NR2F6 (GRN) MRM1
75229	GRN	NR2F6 (GRN) DCPS
75230	GRN	NR2F6 (GRN) NDUFS8
75231	GRN	NR2F6 (GRN) ICT1
75232	GRN	NR2F6 (GRN) PHB
75233	GRN	NR2F6 (GRN) UQCRC1
75234	GRN	NR2F6 (GRN) LACTB2
75235	GRN	NR2F6 (GRN) SNRNP25
75236	GRN	NR2F6 (GRN) ARPC1B
75237	GRN	NR2F6 (GRN) ATP5F1
75238	GRN	NR2F6 (GRN) MGME1
75239	GRN	NR2F6 (GRN) MRPS10
75240	GRN	NR2F6 (GRN) FARSA
75241	GRN	NR2F6 (GRN) NSUN5
75242	GRN	NR2F6 (GRN) GRB2
75243	GRN	NR2F6 (GRN) LEO1
75244	GRN	NR2F6 (GRN) FAM103A1
75245	GRN	NR2F6 (GRN) SNRPC
75246	GRN	NR2F6 (GRN) PCCB
75247	GRN	NR2F6 (GRN) MRPL19
75248	GRN	NR2F6 (GRN) TMEM223
75249	GRN	NR2F6 (GRN) GTF3C6
75250	GRN	NR2F6 (GRN) DBI
75251	GRN	NR2F6 (GRN) CHCHD1
75252	GRN	NR2F6 (GRN) APOA1BP
75253	GRN	NR2F6 (GRN) CISD2
75254	GRN	NR2F6 (GRN) PARS2
75255	GRN	NR2F6 (GRN) MRPS23
75256	GRN	NR2F6 (GRN) SLC35C1
75257	GRN	NR2F6 (GRN) GLYCTK
75258	GRN	NR2F6 (GRN) AP5S1
75259	GRN	NR2F6 (GRN) NDUFS1
75260	GRN	NR2F6 (GRN) HMBS
75261	GRN	NR2F6 (GRN) MRPL24
75262	GRN	NR2F6 (GRN) HARBI1
75263	GRN	NR2F6 (GRN) GEMIN6
75264	GRN	NR2F6 (GRN) PDCD6
75265	GRN	NR2F6 (GRN) GPAM
75266	GRN	NR2F6 (GRN) UQCC2
75267	GRN	NR2F6 (GRN) SWSAP1
75268	GRN	NR2F6 (GRN) TWF2
75269	GRN	NR2F6 (GRN) TACO1
75270	GRN	NR2F6 (GRN) TAF6L
75271	GRN	NR2F6 (GRN) C16orf70
75272	GRN	NR2F6 (GRN) PCBD2
75273	GRN	NR2F6 (GRN) TMCO1
75274	GRN	NR2F6 (GRN) BTF3L4
75275	GRN	NR2F6 (GRN) GCSH
75276	GRN	NR2F6 (GRN) DCTN5
75277	GRN	NR2F6 (GRN) DOLPP1
75278	GRN	NR2F6 (GRN) MRPL36
75279	GRN	NR2F6 (GRN) BRMS1
75280	GRN	NR2F6 (GRN) NSF
75281	GRN	NR2F6 (GRN) MED20
75282	GRN	NR2F6 (GRN) MRPL44
75283	GRN	NR2F6 (GRN) SDHC
75284	GRN	NR2F6 (GRN) NABP2
75285	GRN	NR2F6 (GRN) FAM86C1
75286	GRN	NR2F6 (GRN) MRPS15
75287	GRN	NR2F6 (GRN) ETFA
75288	GRN	NR2F6 (GRN) NIF3L1
75289	GRN	NR2F6 (GRN) ZNF696
75290	GRN	NR2F6 (GRN) AURKAIP1
75291	GRN	NR2F6 (GRN) ECHS1
75465	GRN	TOPORS (GRN) KIF4A
75466	GRN	TOPORS (GRN) CCT5
75467	GRN	TOPORS (GRN) ALG1
75468	GRN	TOPORS (GRN) DDOST
75469	GRN	TOPORS (GRN) PDHB
75470	GRN	TOPORS (GRN) AURKA
75471	GRN	TOPORS (GRN) FITM2
75472	GRN	TOPORS (GRN) CISD3
75473	GRN	TOPORS (GRN) TFB2M
75474	GRN	TOPORS (GRN) MON1A
75475	GRN	TOPORS (GRN) KIAA0101
75476	GRN	TOPORS (GRN) EPDR1
75477	GRN	TOPORS (GRN) FAM64A
75478	GRN	TOPORS (GRN) SKA3
75479	GRN	TOPORS (GRN) SHMT2
75480	GRN	TOPORS (GRN) PXMP4
75481	GRN	TOPORS (GRN) TIMELESS
75482	GRN	TOPORS (GRN) TXNDC17
75483	GRN	TOPORS (GRN) MIS18A
75484	GRN	TOPORS (GRN) OIP5
75485	GRN	TOPORS (GRN) FPR3
75486	GRN	TOPORS (GRN) DTYMK
75487	GRN	TOPORS (GRN) LIMS2
75488	GRN	TOPORS (GRN) S1PR4
75489	GRN	TOPORS (GRN) EME1
75490	GRN	TOPORS (GRN) FEN1
75491	GRN	TOPORS (GRN) GINS2
75492	GRN	TOPORS (GRN) LAMTOR1
75493	GRN	TOPORS (GRN) MRM1
75494	GRN	TOPORS (GRN) SNF8
75495	GRN	TOPORS (GRN) MND1
75496	GRN	TOPORS (GRN) CAPN3
75497	GRN	TOPORS (GRN) SCIMP
75498	GRN	TOPORS (GRN) GOT1
75499	GRN	TOPORS (GRN) FAM203A
75500	GRN	TOPORS (GRN) ACAT1
75501	GRN	TOPORS (GRN) OCIAD2
75502	GRN	TOPORS (GRN) TWF2
75503	GRN	TOPORS (GRN) PSAT1
75504	GRN	TOPORS (GRN) SFXN4
75505	GRN	TOPORS (GRN) ERAL1
75506	GRN	TOPORS (GRN) SRD5A3
75507	GRN	TOPORS (GRN) RENBP
75508	GRN	TOPORS (GRN) FAM136A
75509	GRN	TOPORS (GRN) CSTF2
75510	GRN	TOPORS (GRN) PCNA
75511	GRN	TOPORS (GRN) FIBP
75512	GRN	TOPORS (GRN) CPSF3
75513	GRN	TOPORS (GRN) IDH1
75514	GRN	TOPORS (GRN) SLC39A11
75515	GRN	TOPORS (GRN) CHPF2
75516	GRN	TOPORS (GRN) PARK7
75517	GRN	TOPORS (GRN) RER1
75518	GRN	TOPORS (GRN) COQ9
75519	GRN	TOPORS (GRN) HYLS1
75520	GRN	TOPORS (GRN) MLST8
75521	GRN	TOPORS (GRN) SYS1
75522	GRN	TOPORS (GRN) BRI3BP
75523	GRN	TOPORS (GRN) SLC25A39
75524	GRN	TOPORS (GRN) MRPL37
75525	GRN	TOPORS (GRN) CNP
75526	GRN	TOPORS (GRN) SLC35A4
75527	GRN	TOPORS (GRN) FIGNL1
75528	GRN	TOPORS (GRN) GHITM
75529	GRN	TOPORS (GRN) TEX264
75530	GRN	TOPORS (GRN) TMEM69
75531	GRN	TOPORS (GRN) MED8
75532	GRN	TOPORS (GRN) POLDIP2
75533	GRN	TOPORS (GRN) RPL26L1
75534	GRN	TOPORS (GRN) MRPL15
75535	GRN	TOPORS (GRN) RNASEH2A
75536	GRN	TOPORS (GRN) LAMTOR2
75537	GRN	TOPORS (GRN) ISOC2
75538	GRN	TOPORS (GRN) SNRPE
75539	GRN	TOPORS (GRN) NDC1
75540	GRN	TOPORS (GRN) RABIF
75541	GRN	TOPORS (GRN) COPG1
75542	GRN	TOPORS (GRN) CDK5
75543	GRN	TOPORS (GRN) DIEXF
75544	GRN	TOPORS (GRN) CCDC167
75545	GRN	TOPORS (GRN) LAGE3
75546	GRN	TOPORS (GRN) SLC7A7
75547	GRN	TOPORS (GRN) TOR4A
75548	GRN	TOPORS (GRN) NDUFAF1
75549	GRN	TOPORS (GRN) CNIH4
75550	GRN	TOPORS (GRN) CENPH
75551	GRN	TOPORS (GRN) PGAM1
75552	GRN	TOPORS (GRN) SDHC
75553	GRN	TOPORS (GRN) LYL1
75554	GRN	TOPORS (GRN) COPZ1
75555	GRN	TOPORS (GRN) HMMR
75556	GRN	TOPORS (GRN) SSBP1
75557	GRN	TOPORS (GRN) LYPLA1
75558	GRN	TOPORS (GRN) TMEM147
75559	GRN	TOPORS (GRN) ICT1
75560	GRN	TOPORS (GRN) PHB
75561	GRN	TOPORS (GRN) UROS
75562	GRN	TOPORS (GRN) LACTB2
75563	GRN	TOPORS (GRN) RAN
75564	GRN	TOPORS (GRN) PGBD4
75565	GRN	TOPORS (GRN) SNRNP25
75566	GRN	TOPORS (GRN) DNPH1
75567	GRN	TOPORS (GRN) ATP5F1
75568	GRN	TOPORS (GRN) MGME1
75569	GRN	TOPORS (GRN) AP1S1
75570	GRN	TOPORS (GRN) PREB
75571	GRN	TOPORS (GRN) NUDT8
75572	GRN	TOPORS (GRN) FARSA
75573	GRN	TOPORS (GRN) ATPAF1
75574	GRN	TOPORS (GRN) TUBA1C
75575	GRN	TOPORS (GRN) TANGO2
75576	GRN	TOPORS (GRN) LRRC20
75577	GRN	TOPORS (GRN) LEO1
75578	GRN	TOPORS (GRN) ALG3
75579	GRN	TOPORS (GRN) FAM103A1
75580	GRN	TOPORS (GRN) MRPS33
75581	GRN	TOPORS (GRN) COX6B1
75582	GRN	TOPORS (GRN) PCCB
75583	GRN	TOPORS (GRN) RHOBTB2
75584	GRN	TOPORS (GRN) MRPL19
75585	GRN	TOPORS (GRN) DHRS7B
75586	GRN	TOPORS (GRN) XRCC4
75587	GRN	TOPORS (GRN) ITPA
75588	GRN	TOPORS (GRN) TMEM223
75589	GRN	TOPORS (GRN) ATP5G1
75590	GRN	TOPORS (GRN) DBI
75591	GRN	TOPORS (GRN) WDR89
75592	GRN	TOPORS (GRN) CHCHD1
75593	GRN	TOPORS (GRN) SLC25A20
75594	GRN	TOPORS (GRN) DCPS
75595	GRN	TOPORS (GRN) CISD2
75596	GRN	TOPORS (GRN) ECHS1
75597	GRN	TOPORS (GRN) PARS2
75598	GRN	TOPORS (GRN) L2HGDH
75599	GRN	TOPORS (GRN) MRPS23
75600	GRN	TOPORS (GRN) MRPL27
75601	GRN	TOPORS (GRN) SLC1A4
75602	GRN	TOPORS (GRN) BRI3
75603	GRN	TOPORS (GRN) SCLY
75604	GRN	TOPORS (GRN) PSMB4
75605	GRN	TOPORS (GRN) C19orf40
75606	GRN	TOPORS (GRN) GCSH
75607	GRN	TOPORS (GRN) MRPL24
75608	GRN	TOPORS (GRN) NDUFS1
75609	GRN	TOPORS (GRN) HARBI1
75610	GRN	TOPORS (GRN) NDUFS8
75611	GRN	TOPORS (GRN) GPAM
75612	GRN	TOPORS (GRN) SWSAP1
75613	GRN	TOPORS (GRN) AP5S1
75614	GRN	TOPORS (GRN) DARS2
75615	GRN	TOPORS (GRN) PCBD2
75616	GRN	TOPORS (GRN) TMCO1
75617	GRN	TOPORS (GRN) BTF3L4
75618	GRN	TOPORS (GRN) TBRG4
75619	GRN	TOPORS (GRN) DCTN5
75620	GRN	TOPORS (GRN) DPEP2
75621	GRN	TOPORS (GRN) BRMS1
75622	GRN	TOPORS (GRN) NSF
75623	GRN	TOPORS (GRN) MRPL44
75624	GRN	TOPORS (GRN) UQCC2
75625	GRN	TOPORS (GRN) NABP2
75626	GRN	TOPORS (GRN) AP3M1
75627	GRN	TOPORS (GRN) CTSA
75628	GRN	TOPORS (GRN) MRPS15
75629	GRN	TOPORS (GRN) NSUN5
75630	GRN	TOPORS (GRN) PPP1CA
75631	GRN	TOPORS (GRN) PSMG3
75632	GRN	TOPORS (GRN) PIN1
75633	GRN	TOPORS (GRN) NIF3L1
75634	GRN	TOPORS (GRN) ZNF696
75635	GRN	TOPORS (GRN) AURKAIP1
75885	GRN	ERF (GRN) PDIA6
75886	GRN	ERF (GRN) CDCA5
75887	GRN	ERF (GRN) SNX25
75888	GRN	ERF (GRN) MCM2
75889	GRN	ERF (GRN) MPDU1
75890	GRN	ERF (GRN) TIMELESS
75891	GRN	ERF (GRN) MRPL3
75892	GRN	ERF (GRN) PDIA4
75893	GRN	ERF (GRN) LRRK2
75894	GRN	ERF (GRN) LYRM2
75895	GRN	ERF (GRN) MON1A
75896	GRN	ERF (GRN) ALG1
75897	GRN	ERF (GRN) CYB561D2
75898	GRN	ERF (GRN) HM13
75899	GRN	ERF (GRN) STT3A
75900	GRN	ERF (GRN) AIFM1
75901	GRN	ERF (GRN) ALG5
75902	GRN	ERF (GRN) FLAD1
75903	GRN	ERF (GRN) FAM111B
75904	GRN	ERF (GRN) MIS18A
75905	GRN	ERF (GRN) MEF2BNB
75906	GRN	ERF (GRN) TONSL
75907	GRN	ERF (GRN) SLC38A7
75908	GRN	ERF (GRN) DDOST
75909	GRN	ERF (GRN) FPR3
75910	GRN	ERF (GRN) DRAM1
75911	GRN	ERF (GRN) PAFAH1B3
75912	GRN	ERF (GRN) MANEAL
75913	GRN	ERF (GRN) FICD
75914	GRN	ERF (GRN) TTC39A
75915	GRN	ERF (GRN) CAPN3
75916	GRN	ERF (GRN) FAM203A
75917	GRN	ERF (GRN) SLC27A4
75918	GRN	ERF (GRN) AP1S1
75919	GRN	ERF (GRN) WDR12
75920	GRN	ERF (GRN) TMED3
75921	GRN	ERF (GRN) SAC3D1
75922	GRN	ERF (GRN) SLC1A4
75923	GRN	ERF (GRN) DAP3
75924	GRN	ERF (GRN) RNH1
75925	GRN	ERF (GRN) PRDX4
75926	GRN	ERF (GRN) DPP3
75927	GRN	ERF (GRN) KIAA0101
75928	GRN	ERF (GRN) CD33
75929	GRN	ERF (GRN) CD300LF
75930	GRN	ERF (GRN) PCNA
75931	GRN	ERF (GRN) ALG3
75932	GRN	ERF (GRN) RENBP
75933	GRN	ERF (GRN) CSTF2
75934	GRN	ERF (GRN) RER1
75935	GRN	ERF (GRN) COPG1
75936	GRN	ERF (GRN) COPZ1
75937	GRN	ERF (GRN) TMEM69
75938	GRN	ERF (GRN) PARK7
75939	GRN	ERF (GRN) COQ9
75940	GRN	ERF (GRN) GBA
75941	GRN	ERF (GRN) SAPCD2
75942	GRN	ERF (GRN) NECAB1
75943	GRN	ERF (GRN) SLC35C1
75944	GRN	ERF (GRN) KCNJ15
75945	GRN	ERF (GRN) EPDR1
75946	GRN	ERF (GRN) CTSA
75947	GRN	ERF (GRN) DNPH1
75948	GRN	ERF (GRN) METTL13
75949	GRN	ERF (GRN) C2
75950	GRN	ERF (GRN) MRM1
75951	GRN	ERF (GRN) CPSF3
75952	GRN	ERF (GRN) NDC1
75953	GRN	ERF (GRN) SLC35A4
75954	GRN	ERF (GRN) SFXN4
75955	GRN	ERF (GRN) TMEM79
75956	GRN	ERF (GRN) CDK5
75957	GRN	ERF (GRN) THNSL1
75958	GRN	ERF (GRN) AKR1A1
75959	GRN	ERF (GRN) UMPS
75960	GRN	ERF (GRN) BRI3BP
75961	GRN	ERF (GRN) APEH
75962	GRN	ERF (GRN) FAM86C1
75963	GRN	ERF (GRN) FIGNL1
75964	GRN	ERF (GRN) MYD88
75965	GRN	ERF (GRN) HYLS1
75966	GRN	ERF (GRN) AP5S1
75967	GRN	ERF (GRN) RGS19
75968	GRN	ERF (GRN) DIEXF
75969	GRN	ERF (GRN) SELPLG
75970	GRN	ERF (GRN) MMACHC
75971	GRN	ERF (GRN) FCGR1B
75972	GRN	ERF (GRN) COX5A
75973	GRN	ERF (GRN) TTI2
75974	GRN	ERF (GRN) SEPHS2
75975	GRN	ERF (GRN) CENPH
75976	GRN	ERF (GRN) MRPS12
75977	GRN	ERF (GRN) LMAN2
75978	GRN	ERF (GRN) FBXO41
75979	GRN	ERF (GRN) TRIP13
75980	GRN	ERF (GRN) MRPL15
75981	GRN	ERF (GRN) SLC35B1
75982	GRN	ERF (GRN) MRPS11
75983	GRN	ERF (GRN) TLR8
75984	GRN	ERF (GRN) FITM2
75985	GRN	ERF (GRN) LYL1
75986	GRN	ERF (GRN) TMEM223
75987	GRN	ERF (GRN) SYK
75988	GRN	ERF (GRN) CYB5RL
75989	GRN	ERF (GRN) MS4A7
75990	GRN	ERF (GRN) SLC7A7
75991	GRN	ERF (GRN) ARMC6
75992	GRN	ERF (GRN) MVB12B
75993	GRN	ERF (GRN) C1orf53
75994	GRN	ERF (GRN) DUOX1
75995	GRN	ERF (GRN) MFSD5
75996	GRN	ERF (GRN) DCTPP1
75997	GRN	ERF (GRN) NLE1
75998	GRN	ERF (GRN) TOR4A
75999	GRN	ERF (GRN) LEO1
76000	GRN	ERF (GRN) BLOC1S4
76001	GRN	ERF (GRN) TTLL12
76002	GRN	ERF (GRN) UROS
76003	GRN	ERF (GRN) SLC46A1
76004	GRN	ERF (GRN) WBSCR16
76005	GRN	ERF (GRN) ISCA2
76006	GRN	ERF (GRN) ARHGAP30
76007	GRN	ERF (GRN) ATP5G1
76008	GRN	ERF (GRN) RPP40
76009	GRN	ERF (GRN) GNPDA1
76010	GRN	ERF (GRN) TMEM261
76011	GRN	ERF (GRN) FTSJ2
76012	GRN	ERF (GRN) PARP1
76013	GRN	ERF (GRN) SNRNP25
76014	GRN	ERF (GRN) NFS1
76015	GRN	ERF (GRN) POLR3B
76016	GRN	ERF (GRN) LCMT1
76017	GRN	ERF (GRN) SNUPN
76018	GRN	ERF (GRN) DOK3
76019	GRN	ERF (GRN) XYLB
76020	GRN	ERF (GRN) PDCD2L
76021	GRN	ERF (GRN) GLB1
76022	GRN	ERF (GRN) PTCD2
76023	GRN	ERF (GRN) BRI3
76024	GRN	ERF (GRN) UQCRC1
76025	GRN	ERF (GRN) THAP8
76026	GRN	ERF (GRN) TACO1
76027	GRN	ERF (GRN) PRR19
76028	GRN	ERF (GRN) MPI
76029	GRN	ERF (GRN) TAF6L
76030	GRN	ERF (GRN) FLRT3
76031	GRN	ERF (GRN) ABRACL
76032	GRN	ERF (GRN) PARS2
76033	GRN	ERF (GRN) PDF
76034	GRN	ERF (GRN) SEC13
76035	GRN	ERF (GRN) SLC5A6
76036	GRN	ERF (GRN) FA2H
76037	GRN	ERF (GRN) PGAM5
76038	GRN	ERF (GRN) ITGB2
76039	GRN	ERF (GRN) LAIR1
76040	GRN	ERF (GRN) SLC25A15
76041	GRN	ERF (GRN) C9orf69
76042	GRN	ERF (GRN) BRMS1
76043	GRN	ERF (GRN) SSBP1
76044	GRN	ERF (GRN) FAM173B
76045	GRN	ERF (GRN) GTF3C6
76046	GRN	ERF (GRN) MTX2
76047	GRN	ERF (GRN) MECR
76048	GRN	ERF (GRN) ADCK1
76049	GRN	ERF (GRN) POLR1B
76050	GRN	ERF (GRN) PSMG3
76051	GRN	ERF (GRN) JAGN1
76121	GRN	ETV1 (GRN) FICD
76122	GRN	ETV1 (GRN) LRRK2
76123	GRN	ETV1 (GRN) TMEM177
76124	GRN	ETV1 (GRN) MCM2
76125	GRN	ETV1 (GRN) MIS18A
76126	GRN	ETV1 (GRN) FPR3
76127	GRN	ETV1 (GRN) FAM203A
76128	GRN	ETV1 (GRN) TTC39A
76129	GRN	ETV1 (GRN) CAPN3
76130	GRN	ETV1 (GRN) MON1A
76131	GRN	ETV1 (GRN) SLC27A4
76132	GRN	ETV1 (GRN) MRPS34
76133	GRN	ETV1 (GRN) CD300LF
76134	GRN	ETV1 (GRN) CSTF2
76135	GRN	ETV1 (GRN) MFSD2A
76136	GRN	ETV1 (GRN) PAFAH1B3
76137	GRN	ETV1 (GRN) LIMS2
76138	GRN	ETV1 (GRN) NECAB1
76139	GRN	ETV1 (GRN) ANAPC11
76140	GRN	ETV1 (GRN) TMEM79
76141	GRN	ETV1 (GRN) ALG1
76142	GRN	ETV1 (GRN) NAT10
76143	GRN	ETV1 (GRN) UMPS
76144	GRN	ETV1 (GRN) TMED1
76145	GRN	ETV1 (GRN) SAC3D1
76146	GRN	ETV1 (GRN) RENBP
76147	GRN	ETV1 (GRN) AKR1A1
76148	GRN	ETV1 (GRN) DIEXF
76149	GRN	ETV1 (GRN) UROS
76150	GRN	ETV1 (GRN) AP5S1
76151	GRN	ETV1 (GRN) RGS19
[truncated: 12,114 more rows]
