# Supplementary material
Source: publisher figshare collection journal article supplement (https://springernature.figshare.com/ndownloader/files/35041376)
Supplement: Supplementary file 1 [file 35041376 › CytoscapeSession-2021_06_28-02_05/tables/66396-lung_GRN4GTEx_normal.txt/SHARED_ATTRS-org.cytoscape.model.CyNode-66396+shared+node.cytable]

CyCSV-Version	1
SUID	shared name
java.lang.Long	java.lang.String
66396 shared node
66432	ELK4
66433	ABCA3
66434	FMO5
66435	ZWINT
66436	PLA2G4F
66437	SNX25
66438	FAM111B
66439	CCNB1
66440	CCT3
66441	ALG1
66442	SLC52A2
66443	C16orf59
66444	MCM2
66445	VSIG4
66446	SLC25A10
66447	SAPCD2
66448	PDHB
66449	MPDU1
66450	TMEM163
66451	TIMELESS
66452	HMMR
66453	FITM2
66454	LRRK2
66455	GINS2
66456	TFB2M
66457	LYRM2
66458	MON1A
66459	SYT15
66460	TMEM177
66461	KIAA0101
66462	CYB561D2
66463	PTPN13
66464	MCM4
66465	MRPL3
66466	EPDR1
66467	SKA3
66468	EME1
66469	AIFM1
66470	OIP5
66471	AGPAT2
66472	AAR2
66473	FLAD1
66474	WDR12
66475	VPS18
66476	ALG3
66477	MARVELD3
66478	PCK2
66479	KCNK1
66480	MIS18A
66481	MEF2BNB
66482	FAM136A
66483	C21orf33
66484	TONSL
66485	B3GNT8
66486	NME6
66487	SLC38A7
66488	RNASE6
66489	FPR3
66490	DRAM1
66491	PRDX4
66492	DOLPP1
66493	MND1
66494	FAM203A
66495	TTC39A
66496	NUBP1
66497	PAFAH1B3
66498	ANKEF1
66499	S1PR4
66500	YIF1A
66501	TMED3
66502	CCDC71
66503	SLC39A8
66504	BDH1
66505	TRAIP
66506	APEH
66507	MANEAL
66508	SEC13
66509	C2
66510	GMPPA
66511	TMEM41A
66512	GSTA4
66513	MFSD2A
66514	BEX2
66515	DDOST
66516	FAM64A
66517	TMEM116
66518	SCAMP4
66519	APEX1
66520	GPR34
66521	MRM1
66522	HYOU1
66523	DPP3
66524	CAPN3
66525	COPZ1
66526	CHMP4C
66527	POLR2C
66528	SFXN4
66529	CCR1
66530	OCIAD2
66531	MUL1
66532	MRPS34
66533	AP1S1
66534	C1QBP
66535	LMAN2
66536	TMEM69
66537	SUOX
66538	DAP3
66539	CENPH
66540	SLC25A11
66541	LAIR1
66542	SAC3D1
66543	ATP5G3
66544	CLN6
66545	SLC46A1
66546	ACADS
66547	COPG1
66548	RNH1
66549	ERAL1
66550	CD33
66551	AKR1A1
66552	CD300LF
66553	PCNA
66554	FLRT3
66555	RENBP
66556	CSTF2
66557	SLC35B1
66558	RER1
66559	ILDR1
66560	GOT2
66561	PYCR1
66562	TMEM199
66563	FEM1A
66564	MID1IP1
66565	MLST8
66566	LSS
66567	MFAP3L
66568	PTCD1
66569	C19orf48
66570	FIGNL1
66571	PARP1
66572	CDK5
66573	LIMS2
66574	TIMM13
66575	CPSF3
66576	COQ9
66577	C3AR1
66578	THEM6
66579	C1orf85
66580	GBA
66581	NECAB1
66582	HYLS1
66583	ULK3
66584	DIEXF
66585	DNPH1
66586	SLC35C1
66587	BRI3
66588	CLEC14A
66589	KCNJ15
66590	SYS1
66591	SRD5A3
66592	CTSA
66593	METTL13
66594	PTAFR
66595	C9orf156
66596	ENC1
66597	GSTZ1
66598	MACROD2
66599	COPE
66600	FUT3
66601	THNSL1
66602	NAT10
66603	CNDP2
66604	RBM47
66605	NDC1
66606	TRIP13
66607	SLC35A4
66608	TFAP4
66609	TMEM79
66610	FAM173A
66611	COX5A
66612	LYL1
66613	FAM86A
66614	SNX17
66615	APOBR
66616	RGS19
66617	UMPS
66618	IRAK1
66619	DCTPP1
66620	EARS2
66621	TDRKH
66622	TSSC1
66623	MPV17
66624	MRPS33
66625	SLC5A6
66626	MRPL15
66627	PRAM1
66628	MYO7A
66629	DCAF13
66630	SF3B5
66631	FAM86C1
66632	MYD88
66633	CCDC167
66634	UROS
66635	NRGN
66636	SSBP1
66637	GPD1L
66638	TTLL12
66639	GNPDA1
66640	CCM2L
66641	C1orf53
66642	AP5S1
66643	MDH2
66644	RPP40
66645	ECHS1
66646	SELPLG
66647	MMACHC
66648	FCGR1B
66649	ITGB2
66650	SEC23B
66651	ADSL
66652	FUNDC1
66653	ABCB8
66654	DYX1C1
66655	TTI2
66656	SEPHS2
66657	EGFL7
66658	MTX2
66659	MRPS12
66660	GLB1
66661	FBXO41
66662	GPX1
66663	MRPS27
66664	ESRP2
66665	KDELR1
66666	DENR
66667	FOXRED1
66668	C1orf233
66669	COX6B1
66670	AARS2
66671	TLR8
66672	ITPA
66673	PREP
66674	APOA1BP
66675	ICT1
66676	SPRYD4
66677	TMEM223
66678	FGR
66679	SYK
66680	CYB5RL
66681	MS4A7
66682	PARS2
66683	SLC7A7
66684	POLR3K
66685	SNRPC
66686	ARMC6
66687	ZFYVE19
66688	COMMD9
66689	AIF1
66690	DUOX1
66691	TRAPPC1
66692	WDR81
66693	SPHK2
66694	IRX2
66695	TMEM222
66696	PPP1CA
66697	PET112
66698	MFSD5
66699	SSR1
66700	PRPF19
66701	NLE1
66702	AP1B1
66703	EXO5
66704	FARSA
66705	TOR4A
66706	UQCRC1
66707	MRPL44
66708	LEO1
66709	ARHGEF19
66710	BLOC1S4
66711	PREB
66712	RAN
66713	TREM2
66714	ABRACL
66715	PDCD2L
66716	ARPC1B
66717	WBSCR16
66718	EMILIN2
66719	DOK2
66720	ST3GAL5
66721	ISCA2
66722	TKT
66723	ARHGAP30
66724	YKT6
66725	SDC1
66726	TMEM92
66727	ATP13A2
66728	MECR
66729	VPS11
66730	PES1
66731	MRPL4
66732	C19orf59
66733	RRP1B
66734	SLC25A4
66735	NDUFA8
66736	TMEM261
66737	DAK
66738	MRPS23
66739	FTSJ2
66740	PCBD2
66741	PLIN5
66742	XYLB
66743	DERL2
66744	C9orf69
66745	GRB2
66746	L2HGDH
66747	MTG1
66748	RABEP2
66749	MILR1
66750	TSFM
66751	DLAT
66752	CIAO1
66753	HDHD3
66754	BLNK
66755	GIMAP6
66756	MMP28
66757	CISD2
66758	MPI
66759	PCCB
66760	NFS1
66761	FAH
66762	POLR3B
66763	LACTB2
66764	ASAH1
66765	LCMT1
66766	CUL7
66767	PSMC2
66768	SNUPN
66769	ADORA3
66770	CPT2
66771	ATPAF1
66772	IDH1
66773	DOK3
66774	HN1
66775	GTF3C6
66776	ZDHHC12
66777	RAB42
66778	SCAMP3
66779	PSMD8
66780	SLC39A3
66781	TMEM141
66782	AIMP2
66783	TBL2
66784	FAM103A1
66785	C1orf162
66786	MAP2K2
66787	C11orf1
66788	IMMT
66789	MS4A4A
66790	TACO1
66791	ST14
66792	ACBD6
66793	PTCD2
66794	DDX41
66795	THAP8
66796	BRMS1
66797	RCCD1
66798	RRAGA
66799	GJA5
66800	PRR19
66801	TAF6L
66802	VPS33A
66803	GEMIN7
66804	IGSF6
66805	NUDT19
66806	NIF3L1
66807	PYCRL
66808	PDF
66809	NCLN
66810	MRPS35
66811	CDC123
66812	SDCCAG3
66813	MRPL27
66814	FA2H
66815	TSR3
66816	CD163
66817	TBCC
66818	ASAH2B
66819	ITGAM
66820	TPD52L2
66821	BRAT1
66822	SLC25A15
66823	TMEM106A
66824	TBXAS1
66825	METTL1
66826	CCDC137
66827	TBRG4
66828	B3GNT7
66829	PSMG3
66830	NDUFS1
66831	MRPL36
66832	FAM173B
66833	CD180
66834	FASTKD3
66835	CENPBD1
66836	COX10
66837	C10orf2
66838	ADCK1
66839	RPS6KA4
66840	POLR1B
66841	GPAA1
66842	TARS2
66843	COQ2
66844	HYAL2
66845	MLYCD
66846	ZNF469
66847	JAGN1
66848	ZNF696
66849	ELF4
66850	NLRC4
66851	ECE2
66852	PKMYT1
66853	SNX30
66854	PBK
66855	ALOX5AP
66856	SNF8
66857	PXMP4
66858	B9D2
66859	POLDIP2
66860	PAQR4
66861	RNASEH2A
66862	ACAT1
66863	LAMTOR2
66864	EXOSC5
66865	ATP6V1F
66866	SRD5A1
66867	KCTD14
66868	C5
66869	MRPS11
66870	ALDH4A1
66871	EDEM2
66872	DHRS4L2
66873	CTNS
66874	IPO13
66875	TXN2
66876	EHMT2
66877	STAC3
66878	STOML2
66879	MRS2
66880	ACAD10
66881	ATP5F1
66882	JMJD4
66883	SPRYD7
66884	SSR2
66885	ACP5
66886	EXOSC4
66887	PGAM5
66888	EXOSC1
66889	PARK7
66890	TP53I3
66891	ETV6
66892	ASF1B
66893	PDIA4
66894	FICD
66895	HM13
66896	PAK6
66897	CENPI
66898	STT3A
66899	ALG5
66900	TSPAN3
66901	METTL7B
66902	C14orf1
66903	AACS
66904	SIRT7
66905	SLC27A4
66906	TTPAL
66907	SLC1A4
66908	NSDHL
66909	C19orf24
66910	SMIM4
66911	TSTA3
66912	ANAPC11
66913	C17orf62
66914	MRPL13
66915	LRRC20
66916	DHDDS
66917	TMED1
66918	UQCC2
66919	CHPF2
66920	FRAT1
66921	FADD
66922	CORO1A
66923	CHCHD1
66924	NUDT5
66925	BIN2
66926	TACC3
66927	MRPL35
66928	C16orf70
66929	B4GALT7
66930	PHB
66931	ACOT1
66932	MYO1F
66933	APMAP
66934	SNRNP25
66935	EBP
66936	FAM118B
66937	MTCH2
66938	GCDH
66939	ACAA2
66940	SLC37A4
66941	ADAP1
66942	TCTA
66943	SLX4
66944	KLHL12
66945	VPS25
66946	INTS5
66947	FH
66948	PTK6
66949	SLC25A20
66950	SDHC
66951	AURKAIP1
66952	MRPL19
66953	COA6
66954	GLYCTK
66955	TBCE
66956	ATP5H
66957	CCT5
66958	TTI1
66959	PGBD4
66960	METTL6
66961	GMIP
66962	RPA3
66963	PSMD14
66964	INTS7
66965	GABPA
66966	CDCA5
66967	SLC22A3
66968	TROAP
66969	AURKA
66970	FOXM1
66971	CISD3
66972	RAD51
66973	SHMT2
66974	SLC22A31
66975	RMI2
66976	RILP
66977	DTYMK
66978	PSAT1
66979	SPC25
66980	ZSWIM7
66981	HSD17B4
66982	LAMTOR1
66983	CYB5A
66984	MRPL37
66985	HK3
66986	NIPSNAP1
66987	TRUB2
66988	SGOL2
66989	NSF
66990	OSTC
66991	RPUSD1
66992	TMEM150B
66993	SFXN2
66994	TMEM164
66995	BRI3BP
66996	NUDT8
66997	NUDT16L1
66998	DCPS
66999	TMEM184A
67000	RABIF
67001	NLN
67002	YIF1B
67003	MRPL24
67004	C21orf67
67005	TMCO1
67006	HMBS
67007	SIGLEC9
67008	ZNF362
67009	COG2
67010	CD53
67011	SORBS3
67012	LYPLA1
67013	RBBP4
67014	EHHADH
67015	TMEM147
67016	PGLS
67017	FERMT3
67018	PUSL1
67019	ETFA
67020	MEGF9
67021	SMUG1
67022	HDAC3
67023	UQCRC2
67024	RAP2B
67025	FUT8
67026	NEU1
67027	SLC25A24
67028	ELMO3
67029	SLAMF8
67030	CECR5
67031	MFSD9
67032	FASTK
67033	SNAP47
67034	POLR2D
67035	DHRS7B
67036	BRCC3
67037	C19orf40
67038	TMEM144
67039	PGBD2
67040	BTF3L4
67041	CPOX
67042	FLVCR2
67043	TMA16
67044	ZNF195
67045	CLN3
67046	PALB2
67047	ARL1
67048	EIF2AK1
67049	CCDC58
67050	PDCD6
67051	HARBI1
67052	GPAM
67053	CHAF1A
67054	HYAL1
67055	OPLAH
67056	ZBTB9
67057	DOPEY2
67058	DPEP2
67059	PLEK2
67060	TMEM45B
67061	CCNL2
67062	DECR2
67063	LSM5
67064	RP11-345J4.5
67065	CCR2
67066	C5orf63
67067	ACOT13
67068	PIGO
67069	PIN1
67070	ZSWIM1
67071	NR2F2
67072	KIF4A
67073	NABP2
67074	NR2F6
67075	SKA1
67076	KIF20A
67077	FIBP
67078	SLC39A11
67079	NUP37
67080	CNP
67081	GHITM
67082	ISOC2
67083	NDUFAF1
67084	NDUFS8
67085	MGME1
67086	MRPS10
67087	NSUN5
67088	DBI
67089	GEMIN6
67090	SWSAP1
67091	TWF2
67092	GCSH
67093	DCTN5
67094	MED20
67095	MRPS15
67096	TOPORS
67097	TXNDC17
67098	FEN1
67099	SCIMP
67100	GOT1
67101	SLC25A39
67102	TEX264
67103	MED8
67104	RPL26L1
67105	SNRPE
67106	LAGE3
67107	CNIH4
67108	PGAM1
67109	TUBA1C
67110	TANGO2
67111	RHOBTB2
67112	XRCC4
67113	ATP5G1
67114	WDR89
67115	SCLY
67116	PSMB4
67117	DARS2
67118	AP3M1
67119	ERF
67120	PDIA6
67121	MVB12B
67122	ETV1
67123	FCGR1A
67124	BRCA1
67125	PCSK9
67126	LAMP3
67127	RPS6KA2
67128	ABCC6
67129	RAB40C
67130	TLCD1
67131	PNKD
67132	POLR3H
67133	CPM
67134	SURF4
67135	IDH2
67136	ALPL
67137	PPP1R14C
67138	SCD
67139	FAM195A
67140	DPM2
67141	RPH3AL
67142	CTDNEP1
67143	GPT2
67144	MLXIPL
67145	AATK
67146	KANK1
67147	PC
67148	TOMM40
67149	MRPS2
67150	EHF
67151	VARS
67152	CHID1
67153	ETV3
67154	IMPDH2
67155	ETV4
67156	SMYD5
67157	NRF1
67158	CDC45
67159	RRM2
67160	ELOF1
67161	GYPE
67162	NCF2
67163	FAM105A
67164	LRRC25
67165	CLPTM1L
67166	SLC30A6
67167	NPR1
67168	TBC1D2
67169	ZBTB33
67170	FHDC1
67171	ALDH3B1
67172	TFAP2C
67173	C19orf10
67174	PEPD
67175	NAGLU
67176	URM1
67177	SERPINF2
67178	TCF19
67179	SMAGP
67180	CNPPD1
67181	TMEM204
67182	GCAT
67183	GUCD1
67184	AK1
67185	USF2
67186	ACOXL
67187	MMAB
67188	TFCP2L1
67189	FGFR2
67190	ASL
67191	LSR
67192	CCDC94
67193	USP44
67194	DCAF11
67195	BCAT2
67196	MBIP
67197	C1orf172
67198	ALOX15B
67199	SLC31A2
67200	NECAB3
67201	FZD5
67202	STEAP3
67203	NUDT16
67204	TMEM180
67205	FASN
67206	SERINC2
67207	ADORA2B
67208	MTRR
67209	CRB3
67210	ATP6V0E1
67211	PHYH
67212	SLC26A9
67213	PRKCZ
67214	CNPY2
67215	METTL2A
67216	CYC1
67217	KLF13
67218	KIAA1522
67219	RAB20
67220	EEF1E1
67221	MLX
67222	AHCY
67223	LTA4H
67224	SMARCC2
67225	SASH3
67226	RRP36
67227	SPDL1
67228	UQCRQ
67229	SREBF2
67230	USF1
67231	PLK1
67232	POC1A
67233	RFC4
67234	GRHL2
67235	DFFA
67236	GALE
67237	TSPYL5
67238	ARL11
67239	MRPS16
67240	HMGB3
67241	SND1
67242	RCC1
67243	ATAD3C
67244	RPN2
67245	SLC25A16
67246	TMEM243
67247	ZNF691
67248	GALNT10
67249	CYP51A1
67250	SDHB
67251	PRDX3
67252	LGMN
67253	PFKFB2
67254	SQRDL
67255	FDFT1
67256	C6orf211
67257	ELOVL1
67258	ARNTL
67259	SSR3
67260	ZBED3
67261	ELF5
67262	MYPOP
67263	TYMS
67264	CDC20
67265	MSTO1
67266	RHNO1
67267	PDCD11
67268	PRMT3
67269	TIMM8B
67270	TP53
67271	PSMB2
67272	ZW10
67273	NUDT22
67274	CENPM
67275	CENPO
67276	DUS2
67277	ZKSCAN4
67278	RAE1
67279	C16orf95
67280	PITX2
67281	GTSE1
67282	CHEK1
67283	HSPA12B
67284	CDCA4
67285	EPRS
67286	DUOXA1
67287	SLC35B2
67288	MCTS1
67289	RFT1
67290	RP4-758J18.2
67291	POP4
67292	G6PC3
67293	MTIF2
67294	GPI
67295	RMND5B
67296	UNG
67297	B3GALT6
67298	COX8A
67299	STAT3
67300	TFEB
67301	ZBTB42
67302	PTK7
67303	EMC3
67304	PRIM2
67305	THAP1
67306	ZHX1
67307	LRRC48
67308	C1orf192
67309	PIH1D2
67310	LRRC46
67311	AK8
67312	DNALI1
67313	ETV2
67314	SIX5
67315	APRT
67316	ABHD11
67317	FKBP2
67318	NDUFS7
67319	RECQL4
67320	MFSD3
67321	ATAD3A
67322	FBXL6
67323	SRM
67324	ARNT
67325	BHLHE40
67326	DCLRE1A
67327	BPNT1
67328	VEPH1
67329	SECISBP2L
67330	TGS1
67331	ELK1
67332	HES4
67333	HES5
67334	HES7
67335	ZBTB1
67336	ELF3
67337	TOR3A
67338	ELF1
67339	FXN
67340	MEF2B
67341	MXI1
67342	TP73
67343	WDR66
67344	ZMYND10
67345	SPEF1
67346	LRRC23
67347	CCNO
67348	TSPAN1
67349	ROPN1L
67350	CDHR3
67351	MAK
67352	CETN2
67353	C22orf15
67354	CCDC180
67355	KLHL32
67356	SPAG8
67357	C3orf67
67358	PPIL6
67359	ARHGAP39
67360	C4orf47
67361	FANK1
67362	FAM166B
67363	DNAH10
67364	C9orf117
67365	GRIN3B
67366	NPHP1
67367	WDR54
67368	PPAP2C
67369	RHOV
67370	MDH1B
67371	WDR96
67372	FHAD1
67373	CCDC114
67374	SIX1
67375	FAM154B
67376	CCDC151
67377	WDR16
67378	ADGB
67379	RIBC1
67380	RAB36
67381	PPP1R32
67382	PAX9
67383	IRF6
67384	TSNAXIP1
67385	DENND6B
67386	DNAAF1
67387	C17orf72
67388	TIGD4
67389	TCTEX1D1
67390	OTX1
67391	IFT46
67392	CCDC74A
67393	PVRL4
67394	SRCIN1
67395	RABL5
67396	NGEF
67397	E2F8
67398	SLC52A1
67399	CCDC13
67400	FAM227A
67401	EPN3
67402	DZIP1L
67403	CP
67404	RFX2
67405	C10orf95
67406	SIX4
67407	FBXW9
67408	SPTBN2
67409	IGSF9
67410	SPA17
67411	CCDC24
67412	RUVBL2
67413	SLC44A4
67414	ST6GALNAC1
67415	TTC30B
67416	RFX4
67417	MIPEP
67418	ELK3
67419	HSF1
67420	ARID2
67421	RFX3
67422	RFX5
67423	HEYL
67424	SP4
67425	TFEC
67426	DBP
67427	TBX4
67428	GBX1
67429	NFYC
67430	NFYB
67431	TFE3
67432	E2F5
67433	YY1
67434	EVX2
67435	HSFY2
67436	TP63
67437	FLI1
67438	HEY1
67439	GMEB2
67440	STAT1
67441	TCFL5
67442	CENPB
67443	E2F1
67444	TFDP1
67445	YBX1
67446	ETS1
67447	NR3C2
67448	MEF2D
67449	GCM1
67450	RFX1
67451	MGA
67452	ATF6
67453	THRA
67454	SCRT1
67455	SMAD3
67456	TLX2
67457	JUN
67458	ATOH8
67459	FOXK1
67460	GMEB1
67461	KMT2A
67462	TBX20
67463	MSX1
67464	CAMK2N1
67465	BARX1
67466	BCL6
67467	FOXB1
67468	LHX1
67469	LIN54
67470	MSX2
67471	POU3F3
67472	POU4F2
67473	ZFHX3
67474	ZNF219
67475	CENPA
67476	GINS1
67477	CRTAC1
67478	PARM1
67479	PRSS16
67480	AKAP1
67481	C1orf116
67482	CDKL2
67483	PABPC1L
67484	ABCC10
67485	ZSWIM5
67486	KARS
67487	TMEM9B
67488	QDPR
67489	ARCN1
67490	ARMC9
67491	ARPC4
67492	SLC12A9
67493	MRPL46
67494	CBS
67495	PARN
67496	SMAD6
67497	DNAJA3
67498	HIF1AN
67499	TGFBRAP1
67500	PSME3
67501	E2F4
67502	ZSCAN25
67503	PSMD2
67504	KDM4A
67505	HDDC3
67506	SMG8
67507	NOP56
67508	ZNF341
67509	ADCK5
67510	EIF3B
67511	SIGLEC10
67512	HN1L
67513	FBXO27
67514	EXOSC2
67515	PIP4K2B
67516	CA12
67517	PUS1
67518	TMEM192
67519	FZD8
67520	SLC36A1
67521	ECH1
67522	PSMG1
67523	XKR8
67524	LCMT2
67525	GLTPD1
67526	DFFB
67527	C3orf33
67528	FBXW5
67529	TIMM21
67530	THOP1
67531	PUF60
67532	SHKBP1
67533	ATP5A1
67534	ELP3
67535	LZTR1
67536	PEX3
67537	DEPTOR
67538	ERP29
67539	PTPLAD1
67540	HDHD2
67541	ZNF319
67542	GTF2H3
67543	LSM14B
67544	SAYSD1
67545	TMEM39B
67546	ATP6V1D
67547	ALDH16A1
67548	SNRNP40
67549	CCDC43
67550	ASNA1
67551	TXLNA
67552	SHE
67553	MNDA
67554	POLR1C
67555	BCS1L
67556	LRRC47
67557	TADA3
67558	SIRT2
67559	AASDH
67560	NEURL4
67561	TM6SF1
67562	NPRL3
67563	CLP1
67564	SHARPIN
67565	SEMA4F
67566	CYB561D1
67567	KIAA1279
67568	CHRNB1
67569	DBR1
67570	HPS1
67571	MRPL20
67572	ACAD9
67573	SUGP1
67574	HSDL1
67575	CHAMP1
67576	HADH
67577	PRKAG1
67578	MRPS9
67579	UBTF
67580	REXO4
67581	NAGK
67582	PLGRKT
67583	DBNL
67584	CCDC97
67585	RPL7L1
67586	RDH13
67587	PRIM1
67588	ZMAT5
67589	NKX2-1
67590	EMC1
67591	TSN
67592	SLCO2B1
67593	KIAA0196
67594	USP18
67595	MVP
67596	RPUSD4
67597	MOCS3
67598	FAM217B
67599	LRRC8E
67600	PPT1
67601	BRD8
67602	SPDYE3
67603	KBTBD7
67604	SMPDL3B
67605	FAM78A
67606	STRIP1
67607	TLR4
67608	PSMD4
67609	WDR6
67610	AL591479.1
67611	SNTB1
67612	POLR3C
67613	ZNF212
67614	DNAJC28
67615	ACN9
67616	HENMT1
67617	SPSB2
67618	CHAC2
67619	RHBDD3
67620	ARHGAP35
67621	MSRB1
67622	MRPS18A
67623	TRIAP1
67624	DBT
67625	NIP7
67626	ZNF786
67627	HPS6
67628	MTERFD1
67629	TRMT10C
67630	VAC14
67631	MARS2
67632	GSR
67633	PAK1IP1
67634	GDPGP1
67635	CR1
67636	ZSWIM3
67637	RPUSD2
67638	ZBTB8OS
67639	ZBTB45
67640	DNTTIP1
67641	NDUFB3
67642	PATZ1
67643	ZNF622
67644	RTN4IP1
67645	MESP1
67646	MFNG
67647	TYK2
67648	MRTO4
67649	RPS19BP1
67650	ZNF517
67651	RPP38
67652	RNMTL1
67653	PAXIP1
67654	TRMT61B
67655	TRMT12
67656	PIGW
67657	POP1
67658	C18orf21
67659	KBTBD6
67660	NDUFS3
67661	ZSCAN20
67662	H2AFY
67663	DSCC1
67664	ASCC2
67665	ZNF576
67666	NUFIP1
67667	PPL
67668	TALDO1
67669	FBXL18
67670	MRPL40
67671	TEFM
67672	SRCRB4D
67673	GPN1
67674	ZNF646
67675	PPP1R8
67676	SRRD
67677	RPIA
67678	RFC5
67679	LSM1
67680	C1GALT1C1
67681	C6orf203
67682	AP5Z1
67683	PSKH1
67684	MRPS7
67685	ARRB1
67686	GTF2E1
67687	SEC61A1
67688	TXNDC9
67689	CRELD2
67690	COA4
67691	SRPRB
67692	COMMD5
67693	DPH2
67694	PCYT2
67695	RBFA
67696	C2orf47
67697	RBBP5
67698	ICMT
67699	DHTKD1
67700	ADI1
67701	EAF2
67702	FBXO45
67703	C10orf35
67704	ZNF2
67705	TMEM245
67706	C9orf64
67707	ORC5
67708	ALKBH4
67709	RNF26
67710	SLC25A17
67711	SLC4A1AP
67712	DCTD
67713	TIMM50
67714	ADH5
67715	NUP35
67716	TMEM182
67717	IPP
67718	ASB6
67719	SH3BP5L
67720	COQ3
67721	WDR3
67722	SUV39H1
67723	ABCF2
67724	ZBED6CL
67725	SEC24C
67726	SF3B4
67727	MED19
67728	GOPC
67729	WIBG
67730	L3MBTL2
67731	NAIF1
67732	PSMD9
67733	ASB8
67734	TTC1
67735	VTA1
67736	LRRC61
67737	DNASE1
67738	DNASE1L1
67739	MCAT
67740	URB2
67741	CD14
67742	ZNF385B
67743	TRAM1
67744	DSCR3
67745	CDC25C
67746	NOC2L
67747	ARSE
67748	NCMAP
67749	TENC1
67750	XRCC2
67751	IRF2BP1
67752	MRPL54
67753	C6orf223
67754	YARS2
67755	C15orf52
67756	ATP6V1C1
67757	C12orf4
67758	NDUFB2
67759	DSC2
67760	PANK1
67761	VWA9
67762	FDPS
67763	ABT1
67764	PALMD
67765	NUBP2
67766	ZXDC
67767	RTCA
67768	UBE2D4
67769	ELAC1
67770	ASPSCR1
67771	SMIM1
67772	CACNB1
67773	CHCHD4
67774	PRR15L
67775	MRPS22
67776	GLS2
67777	UBLCP1
67778	VPS4B
67779	GSKIP
67780	EMC7
67781	SIAE
67782	ZNF135
67783	MFSD1
67784	LYPLAL1
67785	USP40
67786	MOB3A
67787	C14orf119
67788	HS1BP3
67789	COL5A1
67790	DNAJB12
67791	C10orf128
67792	RAB10
67793	POP7
67794	RMDN2
67795	DHFR
67796	ITPK1
67797	PNPO
67798	NDUFV3
67799	COG8
67800	BLVRB
67801	PMVK
67802	CSTF1
67803	PDZD11
67804	KCTD5
67805	SLC9A3R2
67806	TMEM186
67807	GLE1
67808	CDK2AP2
67809	DSN1
67810	LGALSL
67811	PWWP2A
67812	PCGF1
67813	CDK4
67814	ST6GALNAC4
67815	PSMB7
67816	DHCR24
67817	TOX
67818	ENTPD3
67819	SEZ6L2
67820	SPTSSA
67821	MRPL47
67822	LPCAT1
67823	RPN1
67824	SYNE4
67825	RTKN
67826	ARV1
67827	YDJC
67828	PIH1D1
67829	SIGLEC7
67830	RP11-664D7.4
67831	ARHGEF15
67832	TRMT5
67833	ATP11A
67834	IARS2
67835	ARAP1
67836	PIGM
67837	NINJ2
67838	GGT1
67839	SNRPB2
67840	PQLC2
67841	SNX1
67842	ZNF408
67843	SLC27A3
67844	LEPREL4
67845	FOXA1
67846	VWA1
67847	DOK4
67848	ACVRL1
67849	SOX9
67850	TMEM258
67851	HPCAL1
67852	ID3
67853	KCNQ1
67854	C19orf54
67855	GOLT1A
67856	SGPP2
67857	PRODH
67858	BEND3
67859	C12orf49
67860	CCDC101
67861	EBNA1BP2
67862	CXCL17
67863	LDHD
67864	ZC2HC1C
67865	TMEM97
67866	ZDHHC3
67867	SLC7A8
67868	LRP2BP
67869	FASTKD5
67870	POU2F3
67871	TXNDC5
67872	RAD1
67873	NDUFAB1
67874	CDK7
67875	CYBA
67876	PPIL1
67877	ACAD8
67878	IFT57
67879	PIP4K2C
67880	GYG2
67881	BCCIP
67882	TMCO4
67883	TMEM254
67884	KNOP1
67885	PLA2G10
67886	ATIC
67887	C11orf70
67888	PSMB5
67889	MTX1
67890	NCBP2
67891	MCM3
67892	FKBPL
67893	PDSS2
67894	FAM175B
67895	TOMM22
67896	ATP6V0D1
67897	CCS
67898	PHPT1
67899	LRRC14
67900	OST4
67901	C1orf123
67902	CTDSP1
67903	LSM4
67904	MRPS18B
67905	EIF4EBP1
67906	SDSL
67907	UBE2L3
67908	RABL2B
67909	ANKRD54
67910	XYLT2
67911	LYPLA2
67912	C3orf18
67913	IKBKE
67914	CORO1B
67915	SIGMAR1
67916	CARD9
67917	TSNARE1
67918	MPST
67919	ZNF575
67920	PSMB10
67921	GLI4
67922	TYMP
67923	CBX8
67924	ZMYND8
67925	EIF2B3
67926	SPATA18
67927	EFCAB12
67928	C9orf24
67929	C8orf47
67930	KIF24
67931	MOK
67932	DRC1
67933	ESPN
67934	CCDC65
67935	NEK5
67936	CD164L2
67937	RSPH9
67938	C9orf116
67939	TMEM231
67940	CCDC170
67941	C16orf93
67942	ARX
67943	EFCAB10
67944	MAT1A
67945	TTC23L
67946	CCDC153
67947	C9orf9
67948	ZNF273
67949	ENKUR
67950	ZNF474
67951	PRR15
67952	TTC18
67953	RPGRIP1L
67954	CCDC113
67955	C20orf26
67956	CDH26
67957	PACRG
67958	ZDHHC13
67959	IQUB
67960	C16orf71
67961	DTHD1
67962	KIF9
67963	ACSBG1
67964	ZMYND12
67965	AK7
67966	OSCP1
67967	UBXN10
67968	EFCAB11
67969	SLC27A2
67970	CCDC74B
67971	IQCC
67972	TMEM232
67973	RTDR1
67974	NEK10
67975	CDS1
67976	VSTM2L
67977	DYNC2H1
67978	GLB1L2
67979	CCDC176
67980	SYT8
67981	HSPB11
67982	CYP2J2
67983	SORD
67984	HEATR2
67985	TJP3
67986	LPAR3
67987	KIAA0408
67988	SLIT2
