# Supplementary material
Source: publisher figshare collection journal article supplement (https://springernature.figshare.com/ndownloader/files/35041376)
Supplement: Supplementary file 1 [file 35041376 › CytoscapeSession-2021_06_28-02_05/tables/66422-lung_GRN4GTEx_normal.txt/LOCAL_ATTRS-org.cytoscape.model.CyEdge-lung_GRN4GTEx_normal.txt+default+edge.cytable]

CyCSV-Version	1
SUID	interaction	name	selected
java.lang.Long	java.lang.String	java.lang.String	java.lang.Boolean
lung_GRN4GTEx_normal.txt default edge
67989	GRN	ELK4 (GRN) ABCA3	false
67990	GRN	ELK4 (GRN) FMO5	false
67991	GRN	ELK4 (GRN) ZWINT	false
67992	GRN	ELK4 (GRN) PLA2G4F	false
67993	GRN	ELK4 (GRN) SNX25	false
67994	GRN	ELK4 (GRN) FAM111B	false
67995	GRN	ELK4 (GRN) CCNB1	false
67996	GRN	ELK4 (GRN) CCT3	false
67997	GRN	ELK4 (GRN) ALG1	false
67998	GRN	ELK4 (GRN) SLC52A2	false
67999	GRN	ELK4 (GRN) C16orf59	false
68000	GRN	ELK4 (GRN) MCM2	false
68001	GRN	ELK4 (GRN) VSIG4	false
68002	GRN	ELK4 (GRN) SLC25A10	false
68003	GRN	ELK4 (GRN) SAPCD2	false
68004	GRN	ELK4 (GRN) PDHB	false
68005	GRN	ELK4 (GRN) MPDU1	false
68006	GRN	ELK4 (GRN) TMEM163	false
68007	GRN	ELK4 (GRN) TIMELESS	false
68008	GRN	ELK4 (GRN) HMMR	false
68009	GRN	ELK4 (GRN) FITM2	false
68010	GRN	ELK4 (GRN) LRRK2	false
68011	GRN	ELK4 (GRN) GINS2	false
68012	GRN	ELK4 (GRN) TFB2M	false
68013	GRN	ELK4 (GRN) LYRM2	false
68014	GRN	ELK4 (GRN) MON1A	false
68015	GRN	ELK4 (GRN) SYT15	false
68016	GRN	ELK4 (GRN) TMEM177	false
68017	GRN	ELK4 (GRN) KIAA0101	false
68018	GRN	ELK4 (GRN) CYB561D2	false
68019	GRN	ELK4 (GRN) PTPN13	false
68020	GRN	ELK4 (GRN) MCM4	false
68021	GRN	ELK4 (GRN) MRPL3	false
68022	GRN	ELK4 (GRN) EPDR1	false
68023	GRN	ELK4 (GRN) SKA3	false
68024	GRN	ELK4 (GRN) EME1	false
68025	GRN	ELK4 (GRN) AIFM1	false
68026	GRN	ELK4 (GRN) OIP5	false
68027	GRN	ELK4 (GRN) AGPAT2	false
68028	GRN	ELK4 (GRN) AAR2	false
68029	GRN	ELK4 (GRN) FLAD1	false
68030	GRN	ELK4 (GRN) WDR12	false
68031	GRN	ELK4 (GRN) VPS18	false
68032	GRN	ELK4 (GRN) ALG3	false
68033	GRN	ELK4 (GRN) MARVELD3	false
68034	GRN	ELK4 (GRN) PCK2	false
68035	GRN	ELK4 (GRN) KCNK1	false
68036	GRN	ELK4 (GRN) MIS18A	false
68037	GRN	ELK4 (GRN) MEF2BNB	false
68038	GRN	ELK4 (GRN) FAM136A	false
68039	GRN	ELK4 (GRN) C21orf33	false
68040	GRN	ELK4 (GRN) TONSL	false
68041	GRN	ELK4 (GRN) B3GNT8	false
68042	GRN	ELK4 (GRN) NME6	false
68043	GRN	ELK4 (GRN) SLC38A7	false
68044	GRN	ELK4 (GRN) RNASE6	false
68045	GRN	ELK4 (GRN) FPR3	false
68046	GRN	ELK4 (GRN) DRAM1	false
68047	GRN	ELK4 (GRN) PRDX4	false
68048	GRN	ELK4 (GRN) DOLPP1	false
68049	GRN	ELK4 (GRN) MND1	false
68050	GRN	ELK4 (GRN) FAM203A	false
68051	GRN	ELK4 (GRN) TTC39A	false
68052	GRN	ELK4 (GRN) NUBP1	false
68053	GRN	ELK4 (GRN) PAFAH1B3	false
68054	GRN	ELK4 (GRN) ANKEF1	false
68055	GRN	ELK4 (GRN) S1PR4	false
68056	GRN	ELK4 (GRN) YIF1A	false
68057	GRN	ELK4 (GRN) TMED3	false
68058	GRN	ELK4 (GRN) CCDC71	false
68059	GRN	ELK4 (GRN) SLC39A8	false
68060	GRN	ELK4 (GRN) BDH1	false
68061	GRN	ELK4 (GRN) TRAIP	false
68062	GRN	ELK4 (GRN) APEH	false
68063	GRN	ELK4 (GRN) MANEAL	false
68064	GRN	ELK4 (GRN) SEC13	false
68065	GRN	ELK4 (GRN) C2	false
68066	GRN	ELK4 (GRN) GMPPA	false
68067	GRN	ELK4 (GRN) TMEM41A	false
68068	GRN	ELK4 (GRN) GSTA4	false
68069	GRN	ELK4 (GRN) MFSD2A	false
68070	GRN	ELK4 (GRN) BEX2	false
68071	GRN	ELK4 (GRN) DDOST	false
68072	GRN	ELK4 (GRN) FAM64A	false
68073	GRN	ELK4 (GRN) TMEM116	false
68074	GRN	ELK4 (GRN) SCAMP4	false
68075	GRN	ELK4 (GRN) APEX1	false
68076	GRN	ELK4 (GRN) GPR34	false
68077	GRN	ELK4 (GRN) MRM1	false
68078	GRN	ELK4 (GRN) HYOU1	false
68079	GRN	ELK4 (GRN) DPP3	false
68080	GRN	ELK4 (GRN) CAPN3	false
68081	GRN	ELK4 (GRN) COPZ1	false
68082	GRN	ELK4 (GRN) CHMP4C	false
68083	GRN	ELK4 (GRN) POLR2C	false
68084	GRN	ELK4 (GRN) SFXN4	false
68085	GRN	ELK4 (GRN) CCR1	false
68086	GRN	ELK4 (GRN) OCIAD2	false
68087	GRN	ELK4 (GRN) MUL1	false
68088	GRN	ELK4 (GRN) MRPS34	false
68089	GRN	ELK4 (GRN) AP1S1	false
68090	GRN	ELK4 (GRN) C1QBP	false
68091	GRN	ELK4 (GRN) LMAN2	false
68092	GRN	ELK4 (GRN) TMEM69	false
68093	GRN	ELK4 (GRN) SUOX	false
68094	GRN	ELK4 (GRN) DAP3	false
68095	GRN	ELK4 (GRN) CENPH	false
68096	GRN	ELK4 (GRN) SLC25A11	false
68097	GRN	ELK4 (GRN) LAIR1	false
68098	GRN	ELK4 (GRN) SAC3D1	false
68099	GRN	ELK4 (GRN) ATP5G3	false
68100	GRN	ELK4 (GRN) CLN6	false
68101	GRN	ELK4 (GRN) SLC46A1	false
68102	GRN	ELK4 (GRN) ACADS	false
68103	GRN	ELK4 (GRN) COPG1	false
68104	GRN	ELK4 (GRN) RNH1	false
68105	GRN	ELK4 (GRN) ERAL1	false
68106	GRN	ELK4 (GRN) CD33	false
68107	GRN	ELK4 (GRN) AKR1A1	false
68108	GRN	ELK4 (GRN) CD300LF	false
68109	GRN	ELK4 (GRN) PCNA	false
68110	GRN	ELK4 (GRN) FLRT3	false
68111	GRN	ELK4 (GRN) RENBP	false
68112	GRN	ELK4 (GRN) CSTF2	false
68113	GRN	ELK4 (GRN) SLC35B1	false
68114	GRN	ELK4 (GRN) RER1	false
68115	GRN	ELK4 (GRN) ILDR1	false
68116	GRN	ELK4 (GRN) GOT2	false
68117	GRN	ELK4 (GRN) PYCR1	false
68118	GRN	ELK4 (GRN) TMEM199	false
68119	GRN	ELK4 (GRN) FEM1A	false
68120	GRN	ELK4 (GRN) MID1IP1	false
68121	GRN	ELK4 (GRN) MLST8	false
68122	GRN	ELK4 (GRN) LSS	false
68123	GRN	ELK4 (GRN) MFAP3L	false
68124	GRN	ELK4 (GRN) PTCD1	false
68125	GRN	ELK4 (GRN) C19orf48	false
68126	GRN	ELK4 (GRN) FIGNL1	false
68127	GRN	ELK4 (GRN) PARP1	false
68128	GRN	ELK4 (GRN) CDK5	false
68129	GRN	ELK4 (GRN) LIMS2	false
68130	GRN	ELK4 (GRN) TIMM13	false
68131	GRN	ELK4 (GRN) CPSF3	false
68132	GRN	ELK4 (GRN) COQ9	false
68133	GRN	ELK4 (GRN) C3AR1	false
68134	GRN	ELK4 (GRN) THEM6	false
68135	GRN	ELK4 (GRN) C1orf85	false
68136	GRN	ELK4 (GRN) GBA	false
68137	GRN	ELK4 (GRN) NECAB1	false
68138	GRN	ELK4 (GRN) HYLS1	false
68139	GRN	ELK4 (GRN) ULK3	false
68140	GRN	ELK4 (GRN) DIEXF	false
68141	GRN	ELK4 (GRN) DNPH1	false
68142	GRN	ELK4 (GRN) SLC35C1	false
68143	GRN	ELK4 (GRN) BRI3	false
68144	GRN	ELK4 (GRN) CLEC14A	false
68145	GRN	ELK4 (GRN) KCNJ15	false
68146	GRN	ELK4 (GRN) SYS1	false
68147	GRN	ELK4 (GRN) SRD5A3	false
68148	GRN	ELK4 (GRN) CTSA	false
68149	GRN	ELK4 (GRN) METTL13	false
68150	GRN	ELK4 (GRN) PTAFR	false
68151	GRN	ELK4 (GRN) C9orf156	false
68152	GRN	ELK4 (GRN) ENC1	false
68153	GRN	ELK4 (GRN) GSTZ1	false
68154	GRN	ELK4 (GRN) MACROD2	false
68155	GRN	ELK4 (GRN) COPE	false
68156	GRN	ELK4 (GRN) FUT3	false
68157	GRN	ELK4 (GRN) THNSL1	false
68158	GRN	ELK4 (GRN) NAT10	false
68159	GRN	ELK4 (GRN) CNDP2	false
68160	GRN	ELK4 (GRN) RBM47	false
68161	GRN	ELK4 (GRN) NDC1	false
68162	GRN	ELK4 (GRN) TRIP13	false
68163	GRN	ELK4 (GRN) SLC35A4	false
68164	GRN	ELK4 (GRN) TFAP4	false
68165	GRN	ELK4 (GRN) TMEM79	false
68166	GRN	ELK4 (GRN) FAM173A	false
68167	GRN	ELK4 (GRN) COX5A	false
68168	GRN	ELK4 (GRN) LYL1	false
68169	GRN	ELK4 (GRN) FAM86A	false
68170	GRN	ELK4 (GRN) SNX17	false
68171	GRN	ELK4 (GRN) APOBR	false
68172	GRN	ELK4 (GRN) RGS19	false
68173	GRN	ELK4 (GRN) UMPS	false
68174	GRN	ELK4 (GRN) IRAK1	false
68175	GRN	ELK4 (GRN) DCTPP1	false
68176	GRN	ELK4 (GRN) EARS2	false
68177	GRN	ELK4 (GRN) TDRKH	false
68178	GRN	ELK4 (GRN) TSSC1	false
68179	GRN	ELK4 (GRN) MPV17	false
68180	GRN	ELK4 (GRN) MRPS33	false
68181	GRN	ELK4 (GRN) SLC5A6	false
68182	GRN	ELK4 (GRN) MRPL15	false
68183	GRN	ELK4 (GRN) PRAM1	false
68184	GRN	ELK4 (GRN) MYO7A	false
68185	GRN	ELK4 (GRN) DCAF13	false
68186	GRN	ELK4 (GRN) SF3B5	false
68187	GRN	ELK4 (GRN) FAM86C1	false
68188	GRN	ELK4 (GRN) MYD88	false
68189	GRN	ELK4 (GRN) CCDC167	false
68190	GRN	ELK4 (GRN) UROS	false
68191	GRN	ELK4 (GRN) NRGN	false
68192	GRN	ELK4 (GRN) SSBP1	false
68193	GRN	ELK4 (GRN) GPD1L	false
68194	GRN	ELK4 (GRN) TTLL12	false
68195	GRN	ELK4 (GRN) GNPDA1	false
68196	GRN	ELK4 (GRN) CCM2L	false
68197	GRN	ELK4 (GRN) C1orf53	false
68198	GRN	ELK4 (GRN) AP5S1	false
68199	GRN	ELK4 (GRN) MDH2	false
68200	GRN	ELK4 (GRN) RPP40	false
68201	GRN	ELK4 (GRN) ECHS1	false
68202	GRN	ELK4 (GRN) SELPLG	false
68203	GRN	ELK4 (GRN) MMACHC	false
68204	GRN	ELK4 (GRN) FCGR1B	false
68205	GRN	ELK4 (GRN) ITGB2	false
68206	GRN	ELK4 (GRN) SEC23B	false
68207	GRN	ELK4 (GRN) ADSL	false
68208	GRN	ELK4 (GRN) FUNDC1	false
68209	GRN	ELK4 (GRN) ABCB8	false
68210	GRN	ELK4 (GRN) DYX1C1	false
68211	GRN	ELK4 (GRN) TTI2	false
68212	GRN	ELK4 (GRN) SEPHS2	false
68213	GRN	ELK4 (GRN) EGFL7	false
68214	GRN	ELK4 (GRN) MTX2	false
68215	GRN	ELK4 (GRN) MRPS12	false
68216	GRN	ELK4 (GRN) GLB1	false
68217	GRN	ELK4 (GRN) FBXO41	false
68218	GRN	ELK4 (GRN) GPX1	false
68219	GRN	ELK4 (GRN) MRPS27	false
68220	GRN	ELK4 (GRN) ESRP2	false
68221	GRN	ELK4 (GRN) KDELR1	false
68222	GRN	ELK4 (GRN) DENR	false
68223	GRN	ELK4 (GRN) FOXRED1	false
68224	GRN	ELK4 (GRN) C1orf233	false
68225	GRN	ELK4 (GRN) COX6B1	false
68226	GRN	ELK4 (GRN) AARS2	false
68227	GRN	ELK4 (GRN) TLR8	false
68228	GRN	ELK4 (GRN) ITPA	false
68229	GRN	ELK4 (GRN) PREP	false
68230	GRN	ELK4 (GRN) APOA1BP	false
68231	GRN	ELK4 (GRN) ICT1	false
68232	GRN	ELK4 (GRN) SPRYD4	false
68233	GRN	ELK4 (GRN) TMEM223	false
68234	GRN	ELK4 (GRN) FGR	false
68235	GRN	ELK4 (GRN) SYK	false
68236	GRN	ELK4 (GRN) CYB5RL	false
68237	GRN	ELK4 (GRN) MS4A7	false
68238	GRN	ELK4 (GRN) PARS2	false
68239	GRN	ELK4 (GRN) SLC7A7	false
68240	GRN	ELK4 (GRN) POLR3K	false
68241	GRN	ELK4 (GRN) SNRPC	false
68242	GRN	ELK4 (GRN) ARMC6	false
68243	GRN	ELK4 (GRN) ZFYVE19	false
68244	GRN	ELK4 (GRN) COMMD9	false
68245	GRN	ELK4 (GRN) AIF1	false
68246	GRN	ELK4 (GRN) DUOX1	false
68247	GRN	ELK4 (GRN) TRAPPC1	false
68248	GRN	ELK4 (GRN) WDR81	false
68249	GRN	ELK4 (GRN) SPHK2	false
68250	GRN	ELK4 (GRN) IRX2	false
68251	GRN	ELK4 (GRN) TMEM222	false
68252	GRN	ELK4 (GRN) PPP1CA	false
68253	GRN	ELK4 (GRN) PET112	false
68254	GRN	ELK4 (GRN) MFSD5	false
68255	GRN	ELK4 (GRN) SSR1	false
68256	GRN	ELK4 (GRN) PRPF19	false
68257	GRN	ELK4 (GRN) NLE1	false
68258	GRN	ELK4 (GRN) AP1B1	false
68259	GRN	ELK4 (GRN) EXO5	false
68260	GRN	ELK4 (GRN) FARSA	false
68261	GRN	ELK4 (GRN) TOR4A	false
68262	GRN	ELK4 (GRN) UQCRC1	false
68263	GRN	ELK4 (GRN) MRPL44	false
68264	GRN	ELK4 (GRN) LEO1	false
68265	GRN	ELK4 (GRN) ARHGEF19	false
68266	GRN	ELK4 (GRN) BLOC1S4	false
68267	GRN	ELK4 (GRN) PREB	false
68268	GRN	ELK4 (GRN) RAN	false
68269	GRN	ELK4 (GRN) TREM2	false
68270	GRN	ELK4 (GRN) ABRACL	false
68271	GRN	ELK4 (GRN) PDCD2L	false
68272	GRN	ELK4 (GRN) ARPC1B	false
68273	GRN	ELK4 (GRN) WBSCR16	false
68274	GRN	ELK4 (GRN) EMILIN2	false
68275	GRN	ELK4 (GRN) DOK2	false
68276	GRN	ELK4 (GRN) ST3GAL5	false
68277	GRN	ELK4 (GRN) ISCA2	false
68278	GRN	ELK4 (GRN) TKT	false
68279	GRN	ELK4 (GRN) ARHGAP30	false
68280	GRN	ELK4 (GRN) YKT6	false
68281	GRN	ELK4 (GRN) SDC1	false
68282	GRN	ELK4 (GRN) TMEM92	false
68283	GRN	ELK4 (GRN) ATP13A2	false
68284	GRN	ELK4 (GRN) MECR	false
68285	GRN	ELK4 (GRN) VPS11	false
68286	GRN	ELK4 (GRN) PES1	false
68287	GRN	ELK4 (GRN) MRPL4	false
68288	GRN	ELK4 (GRN) C19orf59	false
68289	GRN	ELK4 (GRN) RRP1B	false
68290	GRN	ELK4 (GRN) SLC25A4	false
68291	GRN	ELK4 (GRN) NDUFA8	false
68292	GRN	ELK4 (GRN) TMEM261	false
68293	GRN	ELK4 (GRN) DAK	false
68294	GRN	ELK4 (GRN) MRPS23	false
68295	GRN	ELK4 (GRN) FTSJ2	false
68296	GRN	ELK4 (GRN) PCBD2	false
68297	GRN	ELK4 (GRN) PLIN5	false
68298	GRN	ELK4 (GRN) XYLB	false
68299	GRN	ELK4 (GRN) DERL2	false
68300	GRN	ELK4 (GRN) C9orf69	false
68301	GRN	ELK4 (GRN) GRB2	false
68302	GRN	ELK4 (GRN) L2HGDH	false
68303	GRN	ELK4 (GRN) MTG1	false
68304	GRN	ELK4 (GRN) RABEP2	false
68305	GRN	ELK4 (GRN) MILR1	false
68306	GRN	ELK4 (GRN) TSFM	false
68307	GRN	ELK4 (GRN) DLAT	false
68308	GRN	ELK4 (GRN) CIAO1	false
68309	GRN	ELK4 (GRN) HDHD3	false
68310	GRN	ELK4 (GRN) BLNK	false
68311	GRN	ELK4 (GRN) GIMAP6	false
68312	GRN	ELK4 (GRN) MMP28	false
68313	GRN	ELK4 (GRN) CISD2	false
68314	GRN	ELK4 (GRN) MPI	false
68315	GRN	ELK4 (GRN) PCCB	false
68316	GRN	ELK4 (GRN) NFS1	false
68317	GRN	ELK4 (GRN) FAH	false
68318	GRN	ELK4 (GRN) POLR3B	false
68319	GRN	ELK4 (GRN) LACTB2	false
68320	GRN	ELK4 (GRN) ASAH1	false
68321	GRN	ELK4 (GRN) LCMT1	false
68322	GRN	ELK4 (GRN) CUL7	false
68323	GRN	ELK4 (GRN) PSMC2	false
68324	GRN	ELK4 (GRN) SNUPN	false
68325	GRN	ELK4 (GRN) ADORA3	false
68326	GRN	ELK4 (GRN) CPT2	false
68327	GRN	ELK4 (GRN) ATPAF1	false
68328	GRN	ELK4 (GRN) IDH1	false
68329	GRN	ELK4 (GRN) DOK3	false
68330	GRN	ELK4 (GRN) HN1	false
68331	GRN	ELK4 (GRN) GTF3C6	false
68332	GRN	ELK4 (GRN) ZDHHC12	false
68333	GRN	ELK4 (GRN) RAB42	false
68334	GRN	ELK4 (GRN) SCAMP3	false
68335	GRN	ELK4 (GRN) PSMD8	false
68336	GRN	ELK4 (GRN) SLC39A3	false
68337	GRN	ELK4 (GRN) TMEM141	false
68338	GRN	ELK4 (GRN) AIMP2	false
68339	GRN	ELK4 (GRN) TBL2	false
68340	GRN	ELK4 (GRN) FAM103A1	false
68341	GRN	ELK4 (GRN) C1orf162	false
68342	GRN	ELK4 (GRN) MAP2K2	false
68343	GRN	ELK4 (GRN) C11orf1	false
68344	GRN	ELK4 (GRN) IMMT	false
68345	GRN	ELK4 (GRN) MS4A4A	false
68346	GRN	ELK4 (GRN) TACO1	false
68347	GRN	ELK4 (GRN) ST14	false
68348	GRN	ELK4 (GRN) ACBD6	false
68349	GRN	ELK4 (GRN) PTCD2	false
68350	GRN	ELK4 (GRN) DDX41	false
68351	GRN	ELK4 (GRN) THAP8	false
68352	GRN	ELK4 (GRN) BRMS1	false
68353	GRN	ELK4 (GRN) RCCD1	false
68354	GRN	ELK4 (GRN) RRAGA	false
68355	GRN	ELK4 (GRN) GJA5	false
68356	GRN	ELK4 (GRN) PRR19	false
68357	GRN	ELK4 (GRN) TAF6L	false
68358	GRN	ELK4 (GRN) VPS33A	false
68359	GRN	ELK4 (GRN) GEMIN7	false
68360	GRN	ELK4 (GRN) IGSF6	false
68361	GRN	ELK4 (GRN) NUDT19	false
68362	GRN	ELK4 (GRN) NIF3L1	false
68363	GRN	ELK4 (GRN) PYCRL	false
68364	GRN	ELK4 (GRN) PDF	false
68365	GRN	ELK4 (GRN) NCLN	false
68366	GRN	ELK4 (GRN) MRPS35	false
68367	GRN	ELK4 (GRN) CDC123	false
68368	GRN	ELK4 (GRN) SDCCAG3	false
68369	GRN	ELK4 (GRN) MRPL27	false
68370	GRN	ELK4 (GRN) FA2H	false
68371	GRN	ELK4 (GRN) TSR3	false
68372	GRN	ELK4 (GRN) CD163	false
68373	GRN	ELK4 (GRN) TBCC	false
68374	GRN	ELK4 (GRN) ASAH2B	false
68375	GRN	ELK4 (GRN) ITGAM	false
68376	GRN	ELK4 (GRN) TPD52L2	false
68377	GRN	ELK4 (GRN) BRAT1	false
68378	GRN	ELK4 (GRN) SLC25A15	false
68379	GRN	ELK4 (GRN) TMEM106A	false
68380	GRN	ELK4 (GRN) TBXAS1	false
68381	GRN	ELK4 (GRN) METTL1	false
68382	GRN	ELK4 (GRN) CCDC137	false
68383	GRN	ELK4 (GRN) TBRG4	false
68384	GRN	ELK4 (GRN) B3GNT7	false
68385	GRN	ELK4 (GRN) PSMG3	false
68386	GRN	ELK4 (GRN) NDUFS1	false
68387	GRN	ELK4 (GRN) MRPL36	false
68388	GRN	ELK4 (GRN) FAM173B	false
68389	GRN	ELK4 (GRN) CD180	false
68390	GRN	ELK4 (GRN) FASTKD3	false
68391	GRN	ELK4 (GRN) CENPBD1	false
68392	GRN	ELK4 (GRN) COX10	false
68393	GRN	ELK4 (GRN) C10orf2	false
68394	GRN	ELK4 (GRN) ADCK1	false
68395	GRN	ELK4 (GRN) RPS6KA4	false
68396	GRN	ELK4 (GRN) POLR1B	false
68397	GRN	ELK4 (GRN) GPAA1	false
68398	GRN	ELK4 (GRN) TARS2	false
68399	GRN	ELK4 (GRN) COQ2	false
68400	GRN	ELK4 (GRN) HYAL2	false
68401	GRN	ELK4 (GRN) MLYCD	false
68402	GRN	ELK4 (GRN) ZNF469	false
68403	GRN	ELK4 (GRN) JAGN1	false
68404	GRN	ELK4 (GRN) ZNF696	false
68405	GRN	ELK4 (GRN) ALPL	false
68406	GRN	ELK4 (GRN) GINS1	false
68407	GRN	ELK4 (GRN) CRTAC1	false
68408	GRN	ELK4 (GRN) SLC22A3	false
68409	GRN	ELK4 (GRN) PARM1	false
68410	GRN	ELK4 (GRN) PRSS16	false
68411	GRN	ELK4 (GRN) AKAP1	false
68412	GRN	ELK4 (GRN) C1orf116	false
68413	GRN	ELK4 (GRN) CDKL2	false
68414	GRN	ELK4 (GRN) GALNT10	false
68415	GRN	ELK4 (GRN) USP44	false
68416	GRN	ELK4 (GRN) PABPC1L	false
68417	GRN	ELK4 (GRN) ABCC10	false
68418	GRN	ELK4 (GRN) ZSWIM5	false
68419	GRN	ELK4 (GRN) KARS	false
68420	GRN	ELK4 (GRN) TMEM9B	false
68421	GRN	ELK4 (GRN) QDPR	false
68422	GRN	ELK4 (GRN) ARCN1	false
68423	GRN	ELK4 (GRN) ARMC9	false
68424	GRN	ELK4 (GRN) GPAM	false
68425	GRN	ELK4 (GRN) ARPC4	false
68426	GRN	ELK4 (GRN) SLC12A9	false
68427	GRN	ELK4 (GRN) MRPL46	false
68428	GRN	ELK4 (GRN) CBS	false
68429	GRN	ELK4 (GRN) PARN	false
68430	GRN	ELK4 (GRN) SMAD6	false
68431	GRN	ELK4 (GRN) DNAJA3	false
68432	GRN	ELK4 (GRN) HIF1AN	false
68433	GRN	ELK4 (GRN) TGFBRAP1	false
68434	GRN	ELK4 (GRN) PSME3	false
68435	GRN	ELK4 (GRN) SLC30A6	false
68436	GRN	ELK4 (GRN) E2F4	false
68437	GRN	ELK4 (GRN) EHMT2	false
68438	GRN	ELK4 (GRN) ZSCAN25	false
68439	GRN	ELK4 (GRN) CORO1A	false
68440	GRN	ELK4 (GRN) PSMD2	false
68441	GRN	ELK4 (GRN) KDM4A	false
68442	GRN	ELK4 (GRN) HDDC3	false
68443	GRN	ELK4 (GRN) SND1	false
68444	GRN	ELK4 (GRN) SMG8	false
68445	GRN	ELK4 (GRN) NOP56	false
68446	GRN	ELK4 (GRN) ZNF341	false
68447	GRN	ELK4 (GRN) ADCK5	false
68448	GRN	ELK4 (GRN) DCLRE1A	false
68449	GRN	ELK4 (GRN) EIF3B	false
68450	GRN	ELK4 (GRN) BPNT1	false
68451	GRN	ELK4 (GRN) SIGLEC10	false
68452	GRN	ELK4 (GRN) HN1L	false
68453	GRN	ELK4 (GRN) FBXO27	false
68454	GRN	ELK4 (GRN) EXOSC2	false
68455	GRN	ELK4 (GRN) PIP4K2B	false
68456	GRN	ELK4 (GRN) CA12	false
68457	GRN	ELK4 (GRN) PUS1	false
68458	GRN	ELK4 (GRN) TMEM192	false
68459	GRN	ELK4 (GRN) FZD8	false
68460	GRN	ELK4 (GRN) SLC36A1	false
68461	GRN	ELK4 (GRN) ECH1	false
68462	GRN	ELK4 (GRN) PSMG1	false
68463	GRN	ELK4 (GRN) XKR8	false
68464	GRN	ELK4 (GRN) LCMT2	false
68465	GRN	ELK4 (GRN) GLTPD1	false
68466	GRN	ELK4 (GRN) C6orf211	false
68467	GRN	ELK4 (GRN) DFFB	false
68468	GRN	ELK4 (GRN) C3orf33	false
68469	GRN	ELK4 (GRN) RABIF	false
68470	GRN	ELK4 (GRN) FBXW5	false
68471	GRN	ELK4 (GRN) TIMM21	false
68472	GRN	ELK4 (GRN) THOP1	false
68473	GRN	ELK4 (GRN) PUF60	false
68474	GRN	ELK4 (GRN) SHKBP1	false
68475	GRN	ELK4 (GRN) ATP5A1	false
68476	GRN	ELK4 (GRN) ELP3	false
68477	GRN	ELK4 (GRN) LZTR1	false
68478	GRN	ELK4 (GRN) PEX3	false
68479	GRN	ELK4 (GRN) DEPTOR	false
68480	GRN	ELK4 (GRN) ELOVL1	false
68481	GRN	ELK4 (GRN) ERP29	false
68482	GRN	ELK4 (GRN) PTPLAD1	false
68483	GRN	ELK4 (GRN) HDHD2	false
68484	GRN	ELK4 (GRN) ZNF319	false
68485	GRN	ELK4 (GRN) GTF2H3	false
68486	GRN	ELK4 (GRN) LSM14B	false
68487	GRN	ELK4 (GRN) SORBS3	false
68488	GRN	ELK4 (GRN) SAYSD1	false
68489	GRN	ELK4 (GRN) TMEM39B	false
68490	GRN	ELK4 (GRN) ATP6V1D	false
68491	GRN	ELK4 (GRN) ALDH16A1	false
68492	GRN	ELK4 (GRN) SNRNP40	false
68493	GRN	ELK4 (GRN) CCDC43	false
68494	GRN	ELK4 (GRN) C5orf63	false
68495	GRN	ELK4 (GRN) ASNA1	false
68496	GRN	ELK4 (GRN) TXLNA	false
68497	GRN	ELK4 (GRN) SHE	false
68498	GRN	ELK4 (GRN) MNDA	false
68499	GRN	ELK4 (GRN) POLR1C	false
68500	GRN	ELK4 (GRN) BCS1L	false
68501	GRN	ELK4 (GRN) LRRC47	false
68502	GRN	ELK4 (GRN) TADA3	false
68503	GRN	ELK4 (GRN) SIRT2	false
68504	GRN	ELK4 (GRN) CLPTM1L	false
68505	GRN	ELK4 (GRN) AASDH	false
68506	GRN	ELK4 (GRN) NEURL4	false
68507	GRN	ELK4 (GRN) TM6SF1	false
68508	GRN	ELK4 (GRN) NPRL3	false
68509	GRN	ELK4 (GRN) CLP1	false
68510	GRN	ELK4 (GRN) SHARPIN	false
68511	GRN	ELK4 (GRN) SEMA4F	false
68512	GRN	ELK4 (GRN) CYB561D1	false
68513	GRN	ELK4 (GRN) KIAA1279	false
68514	GRN	ELK4 (GRN) CHRNB1	false
68515	GRN	ELK4 (GRN) DBR1	false
68516	GRN	ELK4 (GRN) HPS1	false
68517	GRN	ELK4 (GRN) MRPL20	false
68518	GRN	ELK4 (GRN) ACAD9	false
68519	GRN	ELK4 (GRN) SUGP1	false
68520	GRN	ELK4 (GRN) HSDL1	false
68521	GRN	ELK4 (GRN) CHAMP1	false
68522	GRN	ELK4 (GRN) HADH	false
68523	GRN	ELK4 (GRN) PRKAG1	false
68524	GRN	ELK4 (GRN) MRPS9	false
68525	GRN	ELK4 (GRN) UBTF	false
68526	GRN	ELK4 (GRN) REXO4	false
68527	GRN	ELK4 (GRN) NAGK	false
68528	GRN	ELK4 (GRN) PLGRKT	false
68529	GRN	ELK4 (GRN) DBNL	false
68530	GRN	ELK4 (GRN) CCDC97	false
68531	GRN	ELK4 (GRN) RPL7L1	false
68532	GRN	ELK4 (GRN) RDH13	false
68533	GRN	ELK4 (GRN) PRIM1	false
68534	GRN	ELK4 (GRN) ZMAT5	false
68535	GRN	ELK4 (GRN) NKX2-1	false
68536	GRN	ELK4 (GRN) EMC1	false
68537	GRN	ELK4 (GRN) TSN	false
68538	GRN	ELK4 (GRN) SLCO2B1	false
68539	GRN	ELK4 (GRN) KIAA0196	false
68540	GRN	ELK4 (GRN) USP18	false
68541	GRN	ELK4 (GRN) MVP	false
68542	GRN	ELK4 (GRN) RPUSD4	false
68543	GRN	ELK4 (GRN) MOCS3	false
68544	GRN	ELK4 (GRN) FAM217B	false
68545	GRN	ELK4 (GRN) LRRC8E	false
68546	GRN	ELK4 (GRN) PPT1	false
68547	GRN	ELK4 (GRN) BRD8	false
68548	GRN	ELK4 (GRN) SPDYE3	false
68549	GRN	ELK4 (GRN) KBTBD7	false
68550	GRN	ELK4 (GRN) SMPDL3B	false
68551	GRN	ELK4 (GRN) ZSWIM1	false
68552	GRN	ELK4 (GRN) FAM78A	false
68553	GRN	ELK4 (GRN) STRIP1	false
68554	GRN	ELK4 (GRN) TLR4	false
68555	GRN	ELK4 (GRN) PSMD4	false
68556	GRN	ELK4 (GRN) WDR6	false
68557	GRN	ELK4 (GRN) AL591479.1	false
68558	GRN	ELK4 (GRN) SNTB1	false
68559	GRN	ELK4 (GRN) POLR3C	false
68560	GRN	ELK4 (GRN) ZNF212	false
68561	GRN	ELK4 (GRN) TBC1D2	false
68562	GRN	ELK4 (GRN) DNAJC28	false
68563	GRN	ELK4 (GRN) ACN9	false
68564	GCN	ABCA3 (GCN) ALPL	false
68565	GCN	ABCA3 (GCN) TTC39A	false
68566	GCN	ABCA3 (GCN) MFSD2A	false
68567	GCN	ABCA3 (GCN) MARVELD3	false
68568	GCN	ABCA3 (GCN) LCMT2	false
68569	GCN	ABCA3 (GCN) CPSF3	false
68570	GCN	ABCA3 (GCN) SLC25A10	false
68571	GCN	ABCA3 (GCN) TMEM164	false
68572	GCN	ABCA3 (GCN) C14orf1	false
68573	GCN	ABCA3 (GCN) MFSD9	false
68574	GCN	ABCA3 (GCN) LAMP3	false
68575	GCN	ABCA3 (GCN) DHCR24	false
68576	GCN	ABCA3 (GCN) TLCD1	false
68577	GCN	ABCA3 (GCN) MLXIPL	false
68578	GCN	FMO5 (GCN) DUOX1	false
68579	GCN	FMO5 (GCN) SLC25A10	false
68580	GCN	ZWINT (GCN) GINS1	false
68581	GCN	PLA2G4F (GCN) CRTAC1	false
68582	GCN	PLA2G4F (GCN) SLC22A3	false
68583	GCN	PLA2G4F (GCN) CDKL2	false
68584	GCN	PLA2G4F (GCN) USP44	false
68585	GCN	PLA2G4F (GCN) NKX2-1	false
68586	GCN	PLA2G4F (GCN) ZNF385B	false
68587	GCN	PLA2G4F (GCN) ARSE	false
68588	GCN	PLA2G4F (GCN) NCMAP	false
68589	GCN	PLA2G4F (GCN) C6orf223	false
68590	GCN	PLA2G4F (GCN) ACOXL	false
68591	GCN	PLA2G4F (GCN) PCSK9	false
68592	GCN	PLA2G4F (GCN) SLC26A9	false
68593	GCN	SNX25 (GCN) DUOX1	false
68594	GCN	SNX25 (GCN) PARM1	false
68595	GCN	SNX25 (GCN) PARN	false
68596	GCN	SNX25 (GCN) CBS	false
68597	GCN	SNX25 (GCN) CLPTM1L	false
68598	GCN	SNX25 (GCN) ST14	false
68599	GCN	SNX25 (GCN) DHTKD1	false
68600	GCN	SNX25 (GCN) DHCR24	false
68601	GCN	SNX25 (GCN) SGPP2	false
68602	GCN	SNX25 (GCN) LSR	false
68603	GCN	SNX25 (GCN) BEND3	false
68604	GCN	SNX25 (GCN) RAD1	false
68605	GCN	SNX25 (GCN) GRHL2	false
68606	GCN	FAM111B (GCN) GINS1	false
68607	GCN	FAM111B (GCN) ZWINT	false
68608	GCN	FAM111B (GCN) SAPCD2	false
68609	GCN	FAM111B (GCN) HMMR	false
68610	GCN	CCNB1 (GCN) GINS1	false
68611	GCN	CCNB1 (GCN) ZWINT	false
68612	GCN	CCNB1 (GCN) SAPCD2	false
68613	GCN	CCNB1 (GCN) HMMR	false
68614	GCN	CCNB1 (GCN) C16orf59	false
68615	GCN	CCNB1 (GCN) GINS2	false
68616	GCN	CCNB1 (GCN) EME1	false
68617	GCN	CCNB1 (GCN) FAM136A	false
68618	GCN	CCNB1 (GCN) FAM111B	false
68619	GCN	CCNB1 (GCN) AP1S1	false
68620	GCN	CCNB1 (GCN) DOLPP1	false
68621	GCN	CCNB1 (GCN) PRDX4	false
68622	GCN	CCNB1 (GCN) GMPPA	false
68623	GCN	CCNB1 (GCN) ALG3	false
68624	GCN	CCNB1 (GCN) TSFM	false
68625	GCN	CCNB1 (GCN) WDR12	false
68626	GCN	CCNB1 (GCN) THNSL1	false
68627	GCN	CCNB1 (GCN) DCTPP1	false
68628	GCN	CCNB1 (GCN) LMAN2	false
68629	GCN	CCNB1 (GCN) ATP5G3	false
68630	GCN	CCNB1 (GCN) MANEAL	false
68631	GCN	CCNB1 (GCN) CPSF3	false
68632	GCN	CCNB1 (GCN) IRAK1	false
68633	GCN	CCNB1 (GCN) C1orf85	false
68634	GCN	CCNB1 (GCN) MTX2	false
68635	GCN	CCNB1 (GCN) RPP40	false
68636	GCN	CCNB1 (GCN) POLR3K	false
68637	GCN	CCNB1 (GCN) FAM86A	false
68638	GCN	CCNB1 (GCN) C1QBP	false
68639	GCN	CCNB1 (GCN) MRPL3	false
68640	GCN	CCNB1 (GCN) ISCA2	false
68641	GCN	CCNB1 (GCN) SLC25A10	false
68642	GCN	CCNB1 (GCN) CENPH	false
68643	GCN	CCNB1 (GCN) CTSA	false
68644	GCN	CCNB1 (GCN) PSMG3	false
68645	GCN	CCNB1 (GCN) MRPS33	false
68646	GCN	CCNB1 (GCN) C19orf48	false
68647	GCN	CCNB1 (GCN) PAFAH1B3	false
68648	GCN	CCNB1 (GCN) HN1	false
68649	GCN	CCNB1 (GCN) DNAJA3	false
68650	GCN	CCNB1 (GCN) TDRKH	false
68651	GCN	CCNB1 (GCN) ENC1	false
68652	GCN	CCNB1 (GCN) CSTF2	false
68653	GCN	CCNB1 (GCN) DCAF13	false
68654	GCN	CCNB1 (GCN) NLE1	false
68655	GCN	CCNB1 (GCN) FOXRED1	false
68656	GCN	CCNB1 (GCN) POLR1C	false
68657	GCN	CCNB1 (GCN) METTL1	false
68658	GCN	CCNB1 (GCN) PDCD2L	false
68659	GCN	CCNB1 (GCN) MMACHC	false
68660	GCN	CCNB1 (GCN) ST14	false
68661	GCN	CCNB1 (GCN) AIMP2	false
68662	GCN	CCNB1 (GCN) PPP1CA	false
68663	GCN	CCNB1 (GCN) MRPS23	false
68664	GCN	CCNB1 (GCN) MRPL44	false
68665	GCN	CCNB1 (GCN) ASAH2B	false
68666	GCN	CCNB1 (GCN) TSSC1	false
68667	GCN	CCNB1 (GCN) TMEM79	false
68668	GCN	CCNB1 (GCN) APOA1BP	false
68669	GCN	CCNB1 (GCN) PYCRL	false
68670	GCN	CCNB1 (GCN) RAN	false
68671	GCN	CCNB1 (GCN) LCMT1	false
68672	GCN	CCNB1 (GCN) SEC13	false
68673	GCN	CCNB1 (GCN) MDH2	false
68674	GCN	CCNB1 (GCN) PCBD2	false
68675	GCN	CCNB1 (GCN) AARS2	false
68676	GCN	CCNB1 (GCN) MRPS12	false
68677	GCN	CCNB1 (GCN) PTCD2	false
68678	GCN	CCNB1 (GCN) DENR	false
68679	GCN	CCNB1 (GCN) MECR	false
68680	GCN	CCNB1 (GCN) TBL2	false
68681	GCN	CCNB1 (GCN) SLC35B1	false
68682	GCN	CCNB1 (GCN) DAK	false
68683	GCN	CCNB1 (GCN) HN1L	false
68684	GCN	CCNB1 (GCN) BLOC1S4	false
68685	GCN	CCNB1 (GCN) GEMIN7	false
68686	GCN	CCNB1 (GCN) TACO1	false
68687	GCN	CCNB1 (GCN) RPUSD4	false
68688	GCN	CCNB1 (GCN) APEH	false
68689	GCN	CCNB1 (GCN) PDF	false
68690	GCN	CCNB1 (GCN) TBRG4	false
68691	GCN	CCNB1 (GCN) FAM86C1	false
68692	GCN	CCNB1 (GCN) TIMM13	false
68693	GCN	CCNB1 (GCN) PSMG1	false
68694	GCN	CCNB1 (GCN) PSMD4	false
68695	GCN	CCNB1 (GCN) EXO5	false
68696	GCN	CCNB1 (GCN) UQCRC1	false
68697	GCN	CCNB1 (GCN) VPS33A	false
68698	GCN	CCNB1 (GCN) MTG1	false
68699	GCN	CCNB1 (GCN) CDC123	false
68700	GCN	CCNB1 (GCN) ARHGEF19	false
68701	GCN	CCNB1 (GCN) ABRACL	false
68702	GCN	CCNB1 (GCN) ACN9	false
68703	GCN	CCNB1 (GCN) IDH2	false
68704	GCN	CCNB1 (GCN) UQCRQ	false
68705	GCN	CCNB1 (GCN) RMI2	false
68706	GCN	CCNB1 (GCN) TRUB2	false
68707	GCN	CCNB1 (GCN) TMCO1	false
68708	GCN	CCNB1 (GCN) MTCH2	false
68709	GCN	CCNB1 (GCN) NDUFAB1	false
68710	GCN	CCNB1 (GCN) SSR2	false
68711	GCN	CCNB1 (GCN) CDK7	false
68712	GCN	CCNB1 (GCN) MRPL35	false
68713	GCN	CCNB1 (GCN) VPS25	false
68714	GCN	CCNB1 (GCN) PSAT1	false
68715	GCN	CCNB1 (GCN) PSMD14	false
68716	GCN	CCNB1 (GCN) EBNA1BP2	false
68717	GCN	CCNB1 (GCN) RPUSD1	false
68718	GCN	CCNB1 (GCN) TP53	false
68719	GCN	CCNB1 (GCN) SLX4	false
68720	GCN	CCNB1 (GCN) PPIL1	false
68721	GCN	CCNB1 (GCN) BRCC3	false
68722	GCN	CCNB1 (GCN) AURKA	false
68723	GCN	CCNB1 (GCN) POC1A	false
68724	GCN	CCNB1 (GCN) MRPS16	false
68725	GCN	CCNB1 (GCN) RCC1	false
68726	GCN	CCNB1 (GCN) HMBS	false
68727	GCN	CCNB1 (GCN) GEMIN6	false
68728	GCN	CCNB1 (GCN) SLC39A11	false
68729	GCN	CCNB1 (GCN) FH	false
68730	GCN	CCNB1 (GCN) DHDDS	false
68731	GCN	CCNB1 (GCN) SMUG1	false
68732	GCN	CCNB1 (GCN) MRPS15	false
68733	GCN	CCNB1 (GCN) SDHC	false
68734	GCN	CCNB1 (GCN) PDIA6	false
68735	GCN	CCNB1 (GCN) CNPY2	false
68736	GCN	CCNB1 (GCN) TLCD1	false
68737	GCN	CCNB1 (GCN) RFT1	false
68738	GCN	CCNB1 (GCN) RPN2	false
68739	GCN	CCNB1 (GCN) NUDT5	false
68740	GCN	CCNB1 (GCN) SWSAP1	false
68741	GCN	CCNB1 (GCN) FADD	false
68742	GCN	CCNB1 (GCN) CDC20	false
68743	GCN	CCNB1 (GCN) DHFR	false
68744	GCN	CCNB1 (GCN) UQCC2	false
68745	GCN	CCNB1 (GCN) RPL26L1	false
68746	GCN	CCNB1 (GCN) MTX1	false
68747	GCN	CCNB1 (GCN) MCM3	false
68748	GCN	CCNB1 (GCN) ATP5G1	false
68749	GCN	CCNB1 (GCN) FKBPL	false
68750	GCN	CCNB1 (GCN) KLHL12	false
68751	GCN	CCNB1 (GCN) MRPS7	false
68752	GCN	CCNB1 (GCN) BTF3L4	false
68753	GCN	CCT3 (GCN) ALG3	false
68754	GCN	CCT3 (GCN) RAN	false
68755	GCN	CCT3 (GCN) C1QBP	false
68756	GCN	CCT3 (GCN) MRPL3	false
68757	GCN	CCT3 (GCN) KARS	false
68758	GCN	CCT3 (GCN) PES1	false
68759	GCN	CCT3 (GCN) LMAN2	false
68760	GCN	CCT3 (GCN) WDR12	false
68761	GCN	CCT3 (GCN) RPP40	false
68762	GCN	CCT3 (GCN) YKT6	false
68763	GCN	CCT3 (GCN) ARCN1	false
68764	GCN	CCT3 (GCN) ARPC4	false
68765	GCN	CCT3 (GCN) COPG1	false
68766	GCN	CCT3 (GCN) CCNB1	false
68767	GCN	CCT3 (GCN) PSME3	false
68768	GCN	CCT3 (GCN) FARSA	false
68769	GCN	CCT3 (GCN) PSMD2	false
68770	GCN	CCT3 (GCN) DCAF13	false
68771	GCN	CCT3 (GCN) GTF3C6	false
68772	GCN	CCT3 (GCN) SSR1	false
68773	GCN	CCT3 (GCN) ARMC6	false
68774	GCN	CCT3 (GCN) NOP56	false
68775	GCN	CCT3 (GCN) FAM86A	false
68776	GCN	CCT3 (GCN) SLC35B1	false
68777	GCN	CCT3 (GCN) TPD52L2	false
68778	GCN	CCT3 (GCN) EIF3B	false
68779	GCN	CCT3 (GCN) DDOST	false
68780	GCN	CCT3 (GCN) MRPS12	false
68781	GCN	CCT3 (GCN) PYCR1	false
68782	GCN	CCT3 (GCN) MRPL36	false
68783	GCN	CCT3 (GCN) DNAJA3	false
68784	GCN	CCT3 (GCN) DCTPP1	false
68785	GCN	CCT3 (GCN) SAPCD2	false
68786	GCN	CCT3 (GCN) ATP5A1	false
68787	GCN	CCT3 (GCN) SEC13	false
68788	GCN	CCT3 (GCN) AIFM1	false
68789	GCN	CCT3 (GCN) DOLPP1	false
68790	GCN	CCT3 (GCN) CSTF2	false
68791	GCN	CCT3 (GCN) COPE	false
68792	GCN	CCT3 (GCN) GMPPA	false
68793	GCN	CCT3 (GCN) SLC52A2	false
68794	GCN	CCT3 (GCN) ATP6V1D	false
68795	GCN	CCT3 (GCN) ARPC1B	false
68796	GCN	CCT3 (GCN) CNDP2	false
68797	GCN	CCT3 (GCN) PRDX4	false
68798	GCN	CCT3 (GCN) TXLNA	false
68799	GCN	CCT3 (GCN) ALG1	false
68800	GCN	CCT3 (GCN) METTL1	false
68801	GCN	CCT3 (GCN) GALNT10	false
68802	GCN	CCT3 (GCN) HN1L	false
68803	GCN	CCT3 (GCN) ADSL	false
68804	GCN	CCT3 (GCN) MCM4	false
68805	GCN	CCT3 (GCN) E2F4	false
68806	GCN	CCT3 (GCN) DERL2	false
68807	GCN	CCT3 (GCN) APEH	false
68808	GCN	CCT3 (GCN) TBL2	false
68809	GCN	CCT3 (GCN) PSMC2	false
68810	GCN	CCT3 (GCN) C19orf48	false
68811	GCN	CCT3 (GCN) PYCRL	false
68812	GCN	CCT3 (GCN) PSMG3	false
68813	GCN	CCT3 (GCN) SLC35A4	false
68814	GCN	CCT3 (GCN) EMC1	false
68815	GCN	CCT3 (GCN) PPT1	false
68816	GCN	CCT3 (GCN) GINS1	false
68817	GCN	CCT3 (GCN) SYS1	false
68818	GCN	CCT3 (GCN) SLC25A11	false
68819	GCN	CCT3 (GCN) JAGN1	false
68820	GCN	CCT3 (GCN) C16orf59	false
68821	GCN	CCT3 (GCN) NUBP1	false
68822	GCN	CCT3 (GCN) NOC2L	false
68823	GCN	CCT3 (GCN) SHMT2	false
68824	GCN	CCT3 (GCN) SSR2	false
68825	GCN	CCT3 (GCN) PHB	false
68826	GCN	CCT3 (GCN) POLDIP2	false
68827	GCN	CCT3 (GCN) MTCH2	false
68828	GCN	CCT3 (GCN) TMEM147	false
68829	GCN	CCT3 (GCN) STOML2	false
68830	GCN	CCT3 (GCN) NDUFB2	false
68831	GCN	CCT3 (GCN) TSPAN3	false
68832	GCN	CCT3 (GCN) AURKA	false
68833	GCN	CCT3 (GCN) UBE2D4	false
68834	GCN	CCT3 (GCN) DHDDS	false
68835	GCN	CCT3 (GCN) PSAT1	false
68836	GCN	CCT3 (GCN) CTNS	false
68837	GCN	CCT3 (GCN) RAB10	false
68838	GCN	CCT3 (GCN) HM13	false
68839	GCN	CCT3 (GCN) PDIA4	false
68840	GCN	CCT3 (GCN) SURF4	false
68841	GCN	CCT3 (GCN) PSMD14	false
68842	GCN	CCT3 (GCN) MRPL47	false
68843	GCN	CCT3 (GCN) RPN1	false
68844	GCN	CCT3 (GCN) PDIA6	false
68845	GCN	CCT3 (GCN) FICD	false
68846	GCN	CCT3 (GCN) EBNA1BP2	false
68847	GCN	CCT3 (GCN) MMAB	false
68848	GCN	CCT3 (GCN) CYP51A1	false
68849	GCN	CCT3 (GCN) MED8	false
68850	GCN	CCT3 (GCN) CNPY2	false
68851	GCN	CCT3 (GCN) CCT5	false
68852	GCN	CCT3 (GCN) RPN2	false
68853	GCN	CCT3 (GCN) MRPS16	false
68854	GCN	CCT3 (GCN) RCC1	false
68855	GCN	CCT3 (GCN) BCCIP	false
68856	GCN	CCT3 (GCN) RFT1	false
68857	GCN	CCT3 (GCN) PPIL1	false
68858	GCN	CCT3 (GCN) CDC20	false
68859	GCN	CCT3 (GCN) PSMB5	false
68860	GCN	CCT3 (GCN) NCBP2	false
68861	GCN	CCT3 (GCN) UQCC2	false
68862	GCN	CCT3 (GCN) EIF4EBP1	false
68863	GCN	CCT3 (GCN) UBE2L3	false
68864	GCN	ALG1 (GCN) FAM136A	false
68865	GCN	ALG1 (GCN) MRPL3	false
68866	GCN	ALG1 (GCN) MCM4	false
68867	GCN	ALG1 (GCN) GINS1	false
68868	GCN	ALG1 (GCN) PAFAH1B3	false
68869	GCN	ALG1 (GCN) PYCR1	false
68870	GCN	ALG1 (GCN) PKMYT1	false
68871	GCN	ALG1 (GCN) AURKA	false
68872	GCN	ALG1 (GCN) CDCA5	false
68873	GCN	ALG1 (GCN) PSAT1	false
68874	GCN	ALG1 (GCN) RCC1	false
68875	GCN	ALG1 (GCN) CDC20	false
68876	GCN	SLC52A2 (GCN) MRPS12	false
68877	GCN	SLC52A2 (GCN) ALG3	false
68878	GCN	SLC52A2 (GCN) RNH1	false
68879	GCN	SLC52A2 (GCN) C19orf48	false
68880	GCN	SLC52A2 (GCN) MRPL3	false
68881	GCN	SLC52A2 (GCN) BRI3	false
68882	GCN	SLC52A2 (GCN) WDR12	false
68883	GCN	SLC52A2 (GCN) SAPCD2	false
68884	GCN	SLC52A2 (GCN) C16orf59	false
68885	GCN	SLC52A2 (GCN) IRAK1	false
68886	GCN	SLC52A2 (GCN) PAFAH1B3	false
68887	GCN	SLC52A2 (GCN) GINS1	false
68888	GCN	SLC52A2 (GCN) CCNB1	false
68889	GCN	SLC52A2 (GCN) APOBR	false
68890	GCN	SLC52A2 (GCN) RAN	false
68891	GCN	SLC52A2 (GCN) EME1	false
68892	GCN	SLC52A2 (GCN) HN1	false
68893	GCN	SLC52A2 (GCN) MCM4	false
68894	GCN	SLC52A2 (GCN) PYCR1	false
68895	GCN	SLC52A2 (GCN) ZWINT	false
68896	GCN	SLC52A2 (GCN) LYL1	false
68897	GCN	SLC52A2 (GCN) ALPL	false
68898	GCN	SLC52A2 (GCN) AURKA	false
68899	GCN	SLC52A2 (GCN) SHMT2	false
68900	GCN	SLC52A2 (GCN) PSAT1	false
68901	GCN	SLC52A2 (GCN) NLN	false
68902	GCN	SLC52A2 (GCN) RAD51	false
68903	GCN	SLC52A2 (GCN) PSMD14	false
68904	GCN	SLC52A2 (GCN) CDK4	false
68905	GCN	C16orf59 (GCN) SAPCD2	false
68906	GCN	C16orf59 (GCN) GINS1	false
68907	GCN	C16orf59 (GCN) ZWINT	false
68908	GCN	C16orf59 (GCN) GINS2	false
68909	GCN	C16orf59 (GCN) FAM111B	false
68910	GCN	C16orf59 (GCN) HMMR	false
68911	GCN	C16orf59 (GCN) FAM136A	false
68912	GCN	C16orf59 (GCN) PAFAH1B3	false
68913	GCN	C16orf59 (GCN) DOLPP1	false
68914	GCN	C16orf59 (GCN) C1orf85	false
68915	GCN	C16orf59 (GCN) EME1	false
68916	GCN	C16orf59 (GCN) SLC25A10	false
68917	GCN	C16orf59 (GCN) IRAK1	false
68918	GCN	C16orf59 (GCN) ALG3	false
68919	GCN	C16orf59 (GCN) MANEAL	false
68920	GCN	C16orf59 (GCN) DAK	false
68921	GCN	C16orf59 (GCN) TSSC1	false
68922	GCN	C16orf59 (GCN) CTSA	false
68923	GCN	C16orf59 (GCN) SAC3D1	false
68924	GCN	C16orf59 (GCN) POLR3K	false
68925	GCN	C16orf59 (GCN) TMEM79	false
68926	GCN	C16orf59 (GCN) ST14	false
68927	GCN	C16orf59 (GCN) C1orf233	false
68928	GCN	C16orf59 (GCN) DCTPP1	false
68929	GCN	C16orf59 (GCN) BLNK	false
68930	GCN	C16orf59 (GCN) COPE	false
68931	GCN	C16orf59 (GCN) SLC36A1	false
68932	GCN	C16orf59 (GCN) ENC1	false
68933	GCN	C16orf59 (GCN) DDX41	false
68934	GCN	C16orf59 (GCN) PYCRL	false
68935	GCN	C16orf59 (GCN) TARS2	false
68936	GCN	C16orf59 (GCN) MRPS33	false
68937	GCN	C16orf59 (GCN) GSTZ1	false
68938	GCN	C16orf59 (GCN) ABCB8	false
68939	GCN	C16orf59 (GCN) MDH2	false
68940	GCN	C16orf59 (GCN) CYB561D2	false
68941	GCN	C16orf59 (GCN) ABRACL	false
68942	GCN	C16orf59 (GCN) MPI	false
68943	GCN	C16orf59 (GCN) MMACHC	false
68944	GCN	C16orf59 (GCN) RAB42	false
68945	GCN	C16orf59 (GCN) MRPS12	false
68946	GCN	C16orf59 (GCN) ZNF469	false
68947	GCN	C16orf59 (GCN) SLC35C1	false
68948	GCN	C16orf59 (GCN) THOP1	false
68949	GCN	C16orf59 (GCN) MTCH2	false
68950	GCN	C16orf59 (GCN) SLC1A4	false
68951	GCN	C16orf59 (GCN) UQCC2	false
68952	GCN	C16orf59 (GCN) SLC37A4	false
68953	GCN	C16orf59 (GCN) VPS25	false
68954	GCN	C16orf59 (GCN) SLX4	false
68955	GCN	C16orf59 (GCN) MRPL35	false
68956	GCN	C16orf59 (GCN) RMI2	false
68957	GCN	C16orf59 (GCN) RPUSD1	false
68958	GCN	C16orf59 (GCN) SPC25	false
68959	GCN	C16orf59 (GCN) TRUB2	false
68960	GCN	C16orf59 (GCN) SMUG1	false
68961	GCN	C16orf59 (GCN) HMBS	false
68962	GCN	C16orf59 (GCN) SGOL2	false
68963	GCN	C16orf59 (GCN) NLN	false
68964	GCN	C16orf59 (GCN) NSF	false
68965	GCN	C16orf59 (GCN) RHBDD3	false
68966	GCN	C16orf59 (GCN) EXOSC5	false
68967	GCN	C16orf59 (GCN) UQCRQ	false
68968	GCN	C16orf59 (GCN) GPT2	false
68969	GCN	C16orf59 (GCN) NDUFAB1	false
68970	GCN	MCM2 (GCN) GINS1	false
68971	GCN	MCM2 (GCN) SAPCD2	false
68972	GCN	MCM2 (GCN) GINS2	false
68973	GCN	MCM2 (GCN) CCNB1	false
68974	GCN	MCM2 (GCN) C16orf59	false
68975	GCN	MCM2 (GCN) ZWINT	false
68976	GCN	MCM2 (GCN) DDOST	false
68977	GCN	MCM2 (GCN) ALG1	false
68978	GCN	MCM2 (GCN) FAM111B	false
68979	GCN	MCM2 (GCN) HMMR	false
68980	GCN	MCM2 (GCN) AP5S1	false
68981	GCN	MCM2 (GCN) C1orf85	false
68982	GCN	MCM2 (GCN) AIFM1	false
68983	GCN	MCM2 (GCN) AP1S1	false
68984	GCN	MCM2 (GCN) KIAA0101	false
68985	GCN	MCM2 (GCN) SFXN4	false
68986	GCN	MCM2 (GCN) SLC25A10	false
68987	GCN	MCM2 (GCN) PAFAH1B3	false
68988	GCN	MCM2 (GCN) SLC52A2	false
68989	GCN	MCM2 (GCN) ECHS1	false
68990	GCN	MCM2 (GCN) IRAK1	false
68991	GCN	MCM2 (GCN) ERP29	false
68992	GCN	MCM2 (GCN) CPT2	false
68993	GCN	MCM2 (GCN) FAM86A	false
68994	GCN	MCM2 (GCN) KDELR1	false
68995	GCN	MCM2 (GCN) MTX2	false
68996	GCN	MCM2 (GCN) TMEM177	false
68997	GCN	MCM2 (GCN) HADH	false
68998	GCN	MCM2 (GCN) PSMG3	false
68999	GCN	MCM2 (GCN) C21orf33	false
69000	GCN	MCM2 (GCN) TARS2	false
69001	GCN	MCM2 (GCN) SUOX	false
69002	GCN	MCM2 (GCN) PKMYT1	false
69003	GCN	MCM2 (GCN) RMI2	false
69004	GCN	MCM2 (GCN) NDUFAF1	false
69005	GCN	MCM2 (GCN) CTNS	false
69006	GCN	MCM2 (GCN) ASF1B	false
69007	GCN	MCM2 (GCN) RBFA	false
69008	GCN	MCM2 (GCN) HM13	false
69009	GCN	MCM2 (GCN) UQCC2	false
69010	GCN	MCM2 (GCN) PDIA4	false
69011	GCN	MCM2 (GCN) TACC3	false
69012	GCN	MCM2 (GCN) AURKA	false
69013	GCN	MCM2 (GCN) FOXM1	false
69014	GCN	MCM2 (GCN) MIPEP	false
69015	GCN	MCM2 (GCN) NLN	false
69016	GCN	MCM2 (GCN) SMUG1	false
69017	GCN	MCM2 (GCN) HS1BP3	false
69018	GCN	MCM2 (GCN) MRPS16	false
69019	GCN	MCM2 (GCN) KIF20A	false
69020	GCN	MCM2 (GCN) SLC39A11	false
69021	GCN	MCM2 (GCN) PDZD11	false
69022	GCN	MCM2 (GCN) TXNDC17	false
69023	GCN	MCM2 (GCN) GPT2	false
69024	GCN	MCM2 (GCN) URM1	false
69025	GCN	MCM2 (GCN) PDSS2	false
69026	GCN	MCM2 (GCN) MRPS18B	false
69027	GCN	VSIG4 (GCN) CD163	false
69028	GCN	VSIG4 (GCN) C3AR1	false
69029	GCN	VSIG4 (GCN) ST14	false
69030	GCN	VSIG4 (GCN) GLB1	false
69031	GCN	VSIG4 (GCN) C1orf85	false
69032	GCN	VSIG4 (GCN) MRPS23	false
69033	GCN	VSIG4 (GCN) L2HGDH	false
69034	GCN	VSIG4 (GCN) SLC25A10	false
69035	GCN	VSIG4 (GCN) FAM136A	false
69036	GCN	VSIG4 (GCN) GSR	false
69037	GCN	VSIG4 (GCN) EXOSC5	false
69038	GCN	VSIG4 (GCN) SLAMF8	false
69039	GCN	VSIG4 (GCN) TRUB2	false
69040	GCN	VSIG4 (GCN) SIGLEC9	false
69041	GCN	VSIG4 (GCN) TLCD1	false
69042	GCN	VSIG4 (GCN) TFAP2C	false
69043	GCN	SLC25A10 (GCN) CYB561D2	false
69044	GCN	SLC25A10 (GCN) CPT2	false
69045	GCN	SLC25A10 (GCN) ST14	false
69046	GCN	SLC25A10 (GCN) SCAMP3	false
69047	GCN	SLC25A10 (GCN) SAPCD2	false
69048	GCN	SLC25A10 (GCN) DUOX1	false
69049	GCN	SLC25A10 (GCN) ALPL	false
69050	GCN	SLC25A10 (GCN) ARMC9	false
69051	GCN	SLC25A10 (GCN) PSMG3	false
69052	GCN	SLC25A10 (GCN) C6orf211	false
69053	GCN	SLC25A10 (GCN) GINS1	false
69054	GCN	SLC25A10 (GCN) SLC35A4	false
69055	GCN	SLC25A10 (GCN) QDPR	false
69056	GCN	SLC25A10 (GCN) PARM1	false
69057	GCN	SLC25A10 (GCN) FZD8	false
69058	GCN	SLC25A10 (GCN) PSKH1	false
69059	GCN	SLC25A10 (GCN) ATAD3C	false
69060	GCN	SLC25A10 (GCN) DHCR24	false
69061	GCN	SLC25A10 (GCN) ABCC6	false
69062	GCN	SLC25A10 (GCN) TOX	false
69063	GCN	SLC25A10 (GCN) BLVRB	false
69064	GCN	SLC25A10 (GCN) SLC27A3	false
69065	GCN	SLC25A10 (GCN) ITPK1	false
69066	GCN	SLC25A10 (GCN) C19orf54	false
69067	GCN	SLC25A10 (GCN) KCNQ1	false
69068	GCN	SLC25A10 (GCN) PRODH	false
69069	GCN	SLC25A10 (GCN) CCDC101	false
69070	GCN	SLC25A10 (GCN) LDHD	false
69071	GCN	SLC25A10 (GCN) ZC2HC1C	false
69072	GCN	SAPCD2 (GCN) GINS1	false
69073	GCN	SAPCD2 (GCN) ZWINT	false
69074	GCN	SAPCD2 (GCN) HMMR	false
69075	GCN	SAPCD2 (GCN) TDRKH	false
69076	GCN	SAPCD2 (GCN) C1orf85	false
69077	GCN	SAPCD2 (GCN) ST14	false
69078	GCN	SAPCD2 (GCN) IRAK1	false
69079	GCN	SAPCD2 (GCN) POLR3K	false
69080	GCN	SAPCD2 (GCN) SLC36A1	false
69081	GCN	SAPCD2 (GCN) DDX41	false
69082	GCN	SAPCD2 (GCN) RAB42	false
69083	GCN	SAPCD2 (GCN) AIMP2	false
69084	GCN	SAPCD2 (GCN) ELP3	false
69085	GCN	SAPCD2 (GCN) RHBDD3	false
69086	GCN	SAPCD2 (GCN) RMI2	false
69087	GCN	SAPCD2 (GCN) MTCH2	false
69088	GCN	SAPCD2 (GCN) FH	false
69089	GCN	SAPCD2 (GCN) TRUB2	false
69090	GCN	SAPCD2 (GCN) NLN	false
69091	GCN	PDHB (GCN) PCNA	false
69092	GCN	PDHB (GCN) PSAT1	false
69093	GCN	MPDU1 (GCN) MRPL3	false
69094	GCN	MPDU1 (GCN) CCT3	false
69095	GCN	MPDU1 (GCN) PAFAH1B3	false
69096	GCN	MPDU1 (GCN) SLC25A10	false
69097	GCN	MPDU1 (GCN) TMEM177	false
69098	GCN	MPDU1 (GCN) TIMELESS	false
69099	GCN	MPDU1 (GCN) PYCR1	false
69100	GCN	MPDU1 (GCN) SAPCD2	false
69101	GCN	MPDU1 (GCN) PSAT1	false
69102	GCN	MPDU1 (GCN) RCC1	false
69103	GCN	MPDU1 (GCN) POC1A	false
69104	GCN	TMEM163 (GCN) LRRK2	false
69105	GCN	TMEM163 (GCN) ALPL	false
69106	GCN	TMEM163 (GCN) MFSD2A	false
69107	GCN	TMEM163 (GCN) MMP28	false
69108	GCN	TMEM163 (GCN) KCNJ15	false
69109	GCN	TMEM163 (GCN) SLC25A10	false
69110	GCN	TMEM163 (GCN) OCIAD2	false
69111	GCN	TMEM163 (GCN) LAMP3	false
69112	GCN	TMEM163 (GCN) SNX30	false
69113	GCN	TMEM163 (GCN) TMEM164	false
69114	GCN	TIMELESS (GCN) AIFM1	false
69115	GCN	TIMELESS (GCN) GMPPA	false
69116	GCN	TIMELESS (GCN) GINS1	false
69117	GCN	TIMELESS (GCN) MMACHC	false
69118	GCN	TIMELESS (GCN) DOLPP1	false
69119	GCN	TIMELESS (GCN) MCM4	false
69120	GCN	TIMELESS (GCN) CCNB1	false
69121	GCN	TIMELESS (GCN) GNPDA1	false
69122	GCN	TIMELESS (GCN) HMMR	false
69123	GCN	TIMELESS (GCN) COPG1	false
69124	GCN	TIMELESS (GCN) EME1	false
69125	GCN	TIMELESS (GCN) DDOST	false
69126	GCN	TIMELESS (GCN) SLC38A7	false
69127	GCN	TIMELESS (GCN) SCAMP3	false
69128	GCN	TIMELESS (GCN) C1orf85	false
69129	GCN	TIMELESS (GCN) MRPS27	false
69130	GCN	TIMELESS (GCN) AKR1A1	false
69131	GCN	TIMELESS (GCN) C9orf69	false
69132	GCN	TIMELESS (GCN) SEC13	false
69133	GCN	TIMELESS (GCN) SLC52A2	false
69134	GCN	TIMELESS (GCN) THAP8	false
69135	GCN	TIMELESS (GCN) PAFAH1B3	false
69136	GCN	TIMELESS (GCN) DERL2	false
69137	GCN	TIMELESS (GCN) SDCCAG3	false
69138	GCN	TIMELESS (GCN) YKT6	false
69139	GCN	TIMELESS (GCN) ZWINT	false
69140	GCN	TIMELESS (GCN) FAM86C1	false
69141	GCN	TIMELESS (GCN) MPV17	false
69142	GCN	TIMELESS (GCN) SFXN4	false
69143	GCN	TIMELESS (GCN) LMAN2	false
69144	GCN	TIMELESS (GCN) ZNF341	false
69145	GCN	TIMELESS (GCN) APEH	false
69146	GCN	TIMELESS (GCN) MTG1	false
69147	GCN	TIMELESS (GCN) PYCR1	false
69148	GCN	TIMELESS (GCN) CCT3	false
69149	GCN	TIMELESS (GCN) FAM86A	false
69150	GCN	TIMELESS (GCN) PPP1CA	false
69151	GCN	TIMELESS (GCN) ATP13A2	false
69152	GCN	TIMELESS (GCN) IRAK1	false
69153	GCN	TIMELESS (GCN) SNUPN	false
69154	GCN	TIMELESS (GCN) GINS2	false
69155	GCN	TIMELESS (GCN) PSMG3	false
69156	GCN	TIMELESS (GCN) XKR8	false
69157	GCN	TIMELESS (GCN) THNSL1	false
69158	GCN	TIMELESS (GCN) MRPL15	false
69159	GCN	TIMELESS (GCN) MPI	false
69160	GCN	TIMELESS (GCN) AP5S1	false
69161	GCN	TIMELESS (GCN) GALNT10	false
69162	GCN	TIMELESS (GCN) ECHS1	false
69163	GCN	TIMELESS (GCN) DEPTOR	false
69164	GCN	TIMELESS (GCN) DDX41	false
69165	GCN	TIMELESS (GCN) WBSCR16	false
69166	GCN	TIMELESS (GCN) SLC25A11	false
69167	GCN	TIMELESS (GCN) GPAA1	false
69168	GCN	TIMELESS (GCN) SAYSD1	false
69169	GCN	TIMELESS (GCN) ARCN1	false
69170	GCN	TIMELESS (GCN) TSR3	false
69171	GCN	TIMELESS (GCN) BLOC1S4	false
69172	GCN	TIMELESS (GCN) GEMIN7	false
69173	GCN	TIMELESS (GCN) ASNA1	false
69174	GCN	TIMELESS (GCN) TPD52L2	false
69175	GCN	TIMELESS (GCN) MRPL27	false
69176	GCN	TIMELESS (GCN) FAM111B	false
69177	GCN	TIMELESS (GCN) SLC35B1	false
69178	GCN	TIMELESS (GCN) PET112	false
69179	GCN	TIMELESS (GCN) BCS1L	false
69180	GCN	TIMELESS (GCN) ST14	false
69181	GCN	TIMELESS (GCN) MECR	false
69182	GCN	TIMELESS (GCN) CYB561D1	false
69183	GCN	TIMELESS (GCN) ARHGEF19	false
69184	GCN	TIMELESS (GCN) SLC46A1	false
69185	GCN	TIMELESS (GCN) PTAFR	false
69186	GCN	TIMELESS (GCN) SPHK2	false
69187	GCN	TIMELESS (GCN) ARPC4	false
69188	GCN	TIMELESS (GCN) LYL1	false
69189	GCN	TIMELESS (GCN) RABIF	false
69190	GCN	TIMELESS (GCN) BRD8	false
69191	GCN	TIMELESS (GCN) KBTBD7	false
69192	GCN	TIMELESS (GCN) SMPDL3B	false
69193	GCN	TIMELESS (GCN) BPNT1	false
69194	GCN	TIMELESS (GCN) SCAMP4	false
69195	GCN	TIMELESS (GCN) ITPA	false
69196	GCN	TIMELESS (GCN) MLYCD	false
69197	GCN	TIMELESS (GCN) PCBD2	false
69198	GCN	TIMELESS (GCN) TBC1D2	false
69199	GCN	TIMELESS (GCN) ELOVL1	false
69200	GCN	TIMELESS (GCN) DNAJC28	false
69201	GCN	TIMELESS (GCN) HM13	false
69202	GCN	TIMELESS (GCN) DHDDS	false
69203	GCN	TIMELESS (GCN) SLX4	false
69204	GCN	TIMELESS (GCN) UQCC2	false
69205	GCN	TIMELESS (GCN) CTNS	false
69206	GCN	TIMELESS (GCN) ICMT	false
69207	GCN	TIMELESS (GCN) LAMTOR2	false
69208	GCN	TIMELESS (GCN) IPO13	false
69209	GCN	TIMELESS (GCN) PDIA4	false
69210	GCN	TIMELESS (GCN) PGBD4	false
69211	GCN	TIMELESS (GCN) STT3A	false
69212	GCN	TIMELESS (GCN) KLHL12	false
69213	GCN	TIMELESS (GCN) AURKAIP1	false
69214	GCN	TIMELESS (GCN) SSR2	false
69215	GCN	TIMELESS (GCN) ATP5F1	false
69216	GCN	TIMELESS (GCN) NUDT5	false
69217	GCN	TIMELESS (GCN) TMED1	false
69218	GCN	TIMELESS (GCN) DCTD	false
69219	GCN	TIMELESS (GCN) B4GALT7	false
69220	GCN	TIMELESS (GCN) FADD	false
69221	GCN	TIMELESS (GCN) FICD	false
69222	GCN	TIMELESS (GCN) ATP5H	false
69223	GCN	TIMELESS (GCN) SLC37A4	false
69224	GCN	TIMELESS (GCN) C17orf62	false
69225	GCN	TIMELESS (GCN) TSTA3	false
69226	GCN	TIMELESS (GCN) CHPF2	false
69227	GCN	TIMELESS (GCN) COMMD5	false
69228	GCN	TIMELESS (GCN) NDUFAF1	false
69229	GCN	TIMELESS (GCN) CDCA5	false
69230	GCN	TIMELESS (GCN) DCPS	false
69231	GCN	TIMELESS (GCN) AURKA	false
69232	GCN	TIMELESS (GCN) PGBD2	false
69233	GCN	TIMELESS (GCN) TMEM147	false
69234	GCN	TIMELESS (GCN) CECR5	false
69235	GCN	TIMELESS (GCN) NSF	false
69236	GCN	TIMELESS (GCN) FOXM1	false
69237	GCN	TIMELESS (GCN) RPUSD1	false
69238	GCN	TIMELESS (GCN) TRUB2	false
69239	GCN	TIMELESS (GCN) HMBS	false
69240	GCN	TIMELESS (GCN) RAD51	false
69241	GCN	TIMELESS (GCN) CISD3	false
69242	GCN	TIMELESS (GCN) MRPL24	false
69243	GCN	TIMELESS (GCN) NLN	false
69244	GCN	TIMELESS (GCN) ATAD3C	false
69245	GCN	TIMELESS (GCN) CLN3	false
69246	GCN	TIMELESS (GCN) MOB3A	false
69247	GCN	TIMELESS (GCN) MRPS16	false
69248	GCN	TIMELESS (GCN) MED20	false
69249	GCN	TIMELESS (GCN) NSUN5	false
69250	GCN	TIMELESS (GCN) NDUFS8	false
69251	GCN	TIMELESS (GCN) NDUFV3	false
69252	GCN	TIMELESS (GCN) C6orf203	false
69253	GCN	TIMELESS (GCN) B3GALT6	false
69254	GCN	TIMELESS (GCN) COG8	false
69255	GCN	TIMELESS (GCN) GEMIN6	false
69256	GCN	TIMELESS (GCN) KIF20A	false
69257	GCN	TIMELESS (GCN) PMVK	false
69258	GCN	TIMELESS (GCN) SLC39A11	false
69259	GCN	TIMELESS (GCN) MRPS15	false
69260	GCN	TIMELESS (GCN) RP4-758J18.2	false
69261	GCN	TIMELESS (GCN) TANGO2	false
69262	GCN	TIMELESS (GCN) TXNDC17	false
69263	GCN	TIMELESS (GCN) GLE1	false
69264	GCN	TIMELESS (GCN) CDK2AP2	false
69265	GCN	TIMELESS (GCN) MED8	false
69266	GCN	TIMELESS (GCN) ZNF691	false
69267	GCN	TIMELESS (GCN) TMEM186	false
69268	GCN	TIMELESS (GCN) PWWP2A	false
69269	GCN	TIMELESS (GCN) PCGF1	false
69270	GCN	TIMELESS (GCN) DPM2	false
69271	GCN	TIMELESS (GCN) GPT2	false
69272	GCN	TIMELESS (GCN) PKMYT1	false
69273	GCN	TIMELESS (GCN) CHID1	false
69274	GCN	TIMELESS (GCN) CDC45	false
69275	GCN	TIMELESS (GCN) RFT1	false
69276	GCN	TIMELESS (GCN) LEPREL4	false
69277	GCN	TIMELESS (GCN) C19orf10	false
69278	GCN	TIMELESS (GCN) TMEM258	false
69279	GCN	TIMELESS (GCN) UQCRQ	false
69280	GCN	TIMELESS (GCN) CNPY2	false
69281	GCN	TIMELESS (GCN) POC1A	false
69282	GCN	TIMELESS (GCN) RCC1	false
69283	GCN	TIMELESS (GCN) TMCO4	false
69284	GCN	TIMELESS (GCN) STEAP3	false
69285	GCN	TIMELESS (GCN) KNOP1	false
69286	GCN	TIMELESS (GCN) CHEK1	false
69287	GCN	TIMELESS (GCN) PHPT1	false
69288	GCN	TIMELESS (GCN) G6PC3	false
69289	GCN	TIMELESS (GCN) ATP6V0D1	false
69290	GCN	HMMR (GCN) GINS1	false
69291	GCN	HMMR (GCN) ZWINT	false
69292	GCN	HMMR (GCN) TDRKH	false
69293	GCN	HMMR (GCN) C1orf85	false
69294	GCN	HMMR (GCN) RMI2	false
69295	GCN	HMMR (GCN) FH	false
69296	GCN	HMMR (GCN) NLN	false
69297	GCN	HMMR (GCN) MRPS16	false
69298	GCN	HMMR (GCN) DHFR	false
69299	GCN	FITM2 (GCN) TFB2M	false
69300	GCN	FITM2 (GCN) SLC25A10	false
69301	GCN	FITM2 (GCN) SYT15	false
69302	GCN	FITM2 (GCN) TMEM177	false
69303	GCN	FITM2 (GCN) TIMELESS	false
69304	GCN	FITM2 (GCN) CCT3	false
69305	GCN	FITM2 (GCN) SGOL2	false
69306	GCN	FITM2 (GCN) PSAT1	false
69307	GCN	FITM2 (GCN) LAMP3	false
69308	GCN	FITM2 (GCN) RCC1	false
69309	GCN	LRRK2 (GCN) DUOX1	false
69310	GCN	LRRK2 (GCN) GSTA4	false
69311	GCN	LRRK2 (GCN) KCNJ15	false
69312	GCN	LRRK2 (GCN) SNX25	false
69313	GCN	LRRK2 (GCN) MFSD2A	false
69314	GCN	LRRK2 (GCN) TTC39A	false
69315	GCN	LRRK2 (GCN) MARVELD3	false
69316	GCN	LRRK2 (GCN) L2HGDH	false
69317	GCN	LRRK2 (GCN) ALPL	false
69318	GCN	LRRK2 (GCN) TMEM41A	false
69319	GCN	LRRK2 (GCN) POLR2C	false
69320	GCN	LRRK2 (GCN) MRPS23	false
69321	GCN	LRRK2 (GCN) C1orf116	false
69322	GCN	LRRK2 (GCN) OCIAD2	false
69323	GCN	LRRK2 (GCN) CPSF3	false
69324	GCN	LRRK2 (GCN) MTX2	false
69325	GCN	LRRK2 (GCN) KCTD14	false
69326	GCN	LRRK2 (GCN) PAK6	false
69327	GCN	LRRK2 (GCN) KLHL12	false
69328	GCN	LRRK2 (GCN) TTPAL	false
69329	GCN	LRRK2 (GCN) TMEM164	false
69330	GCN	LRRK2 (GCN) FHDC1	false
69331	GCN	LRRK2 (GCN) SCD	false
69332	GCN	LRRK2 (GCN) DSC2	false
69333	GCN	LRRK2 (GCN) MFSD9	false
69334	GCN	LRRK2 (GCN) TLCD1	false
69335	GCN	LRRK2 (GCN) SLC39A11	false
69336	GCN	LRRK2 (GCN) IARS2	false
69337	GCN	LRRK2 (GCN) FGFR2	false
69338	GCN	LRRK2 (GCN) DHCR24	false
69339	GCN	LRRK2 (GCN) LSR	false
69340	GCN	LRRK2 (GCN) KIAA1522	false
69341	GCN	LRRK2 (GCN) SLC7A8	false
69342	GCN	LRRK2 (GCN) BCAT2	false
69343	GCN	LRRK2 (GCN) RAD1	false
69344	GCN	GINS2 (GCN) ZWINT	false
69345	GCN	GINS2 (GCN) GINS1	false
69346	GCN	GINS2 (GCN) SAPCD2	false
69347	GCN	GINS2 (GCN) FAM111B	false
69348	GCN	GINS2 (GCN) HMMR	false
69349	GCN	GINS2 (GCN) MANEAL	false
69350	GCN	GINS2 (GCN) POLR3K	false
69351	GCN	GINS2 (GCN) C1orf85	false
69352	GCN	GINS2 (GCN) DCTPP1	false
69353	GCN	GINS2 (GCN) TDRKH	false
69354	GCN	GINS2 (GCN) GSTZ1	false
69355	GCN	GINS2 (GCN) PPP1CA	false
69356	GCN	GINS2 (GCN) CYB561D2	false
69357	GCN	GINS2 (GCN) FH	false
69358	GCN	GINS2 (GCN) RMI2	false
69359	GCN	GINS2 (GCN) TRUB2	false
69360	GCN	GINS2 (GCN) MTCH2	false
69361	GCN	GINS2 (GCN) RBBP4	false
69362	GCN	GINS2 (GCN) MRPS16	false
69363	GCN	GINS2 (GCN) DHFR	false
69364	GCN	GINS2 (GCN) SLC1A4	false
69365	GCN	TFB2M (GCN) MUL1	false
69366	GCN	TFB2M (GCN) ABCA3	false
69367	GCN	TFB2M (GCN) SYS1	false
69368	GCN	TFB2M (GCN) PTAFR	false
69369	GCN	TFB2M (GCN) TMEM9B	false
69370	GCN	TFB2M (GCN) ALPL	false
69371	GCN	TFB2M (GCN) C9orf156	false
69372	GCN	TFB2M (GCN) MACROD2	false
69373	GCN	TFB2M (GCN) ARMC9	false
69374	GCN	TFB2M (GCN) CCNB1	false
69375	GCN	TFB2M (GCN) QDPR	false
69376	GCN	TFB2M (GCN) MIS18A	false
69377	GCN	TFB2M (GCN) ASAH1	false
69378	GCN	TFB2M (GCN) SNX25	false
69379	GCN	TFB2M (GCN) MFSD2A	false
69380	GCN	TFB2M (GCN) BRI3	false
69381	GCN	TFB2M (GCN) GINS1	false
69382	GCN	TFB2M (GCN) C2	false
69383	GCN	TFB2M (GCN) LRRK2	false
69384	GCN	TFB2M (GCN) DRAM1	false
69385	GCN	TFB2M (GCN) SLC25A10	false
69386	GCN	TFB2M (GCN) C9orf64	false
69387	GCN	TFB2M (GCN) DSCR3	false
69388	GCN	TFB2M (GCN) SLC25A24	false
69389	GCN	TFB2M (GCN) ACAA2	false
69390	GCN	TFB2M (GCN) AURKA	false
69391	GCN	TFB2M (GCN) SLC25A20	false
69392	GCN	TFB2M (GCN) FLVCR2	false
69393	GCN	TFB2M (GCN) NDUFAF1	false
69394	GCN	TFB2M (GCN) RMDN2	false
69395	GCN	TFB2M (GCN) RPS6KA2	false
69396	GCN	TFB2M (GCN) LAMP3	false
69397	GCN	TFB2M (GCN) SLC31A2	false
69398	GCN	TFB2M (GCN) C5	false
69399	GCN	TFB2M (GCN) VEPH1	false
69400	GCN	TFB2M (GCN) EMC3	false
69401	GCN	LYRM2 (GCN) MRPL3	false
69402	GCN	MON1A (GCN) PSMG3	false
69403	GCN	MON1A (GCN) TMEM177	false
69404	GCN	MON1A (GCN) TIMELESS	false
69405	GCN	MON1A (GCN) CCT3	false
69406	GCN	MON1A (GCN) SAPCD2	false
69407	GCN	SYT15 (GCN) ST3GAL5	false
69408	GCN	SYT15 (GCN) PRSS16	false
69409	GCN	SYT15 (GCN) DUOX1	false
69410	GCN	SYT15 (GCN) PTPN13	false
69411	GCN	SYT15 (GCN) AKAP1	false
69412	GCN	SYT15 (GCN) C1orf116	false
69413	GCN	SYT15 (GCN) GSTA4	false
69414	GCN	SYT15 (GCN) KCNJ15	false
69415	GCN	SYT15 (GCN) ESRP2	false
69416	GCN	SYT15 (GCN) POLR2C	false
69417	GCN	SYT15 (GCN) EPDR1	false
69418	GCN	SYT15 (GCN) SNX25	false
69419	GCN	SYT15 (GCN) GPD1L	false
69420	GCN	SYT15 (GCN) MMP28	false
69421	GCN	SYT15 (GCN) ZSWIM5	false
69422	GCN	SYT15 (GCN) CHMP4C	false
69423	GCN	SYT15 (GCN) PARM1	false
69424	GCN	SYT15 (GCN) TMEM116	false
69425	GCN	SYT15 (GCN) LSS	false
69426	GCN	SYT15 (GCN) GPAM	false
69427	GCN	SYT15 (GCN) ASAH1	false
69428	GCN	SYT15 (GCN) CBS	false
69429	GCN	SYT15 (GCN) B3GNT8	false
69430	GCN	SYT15 (GCN) HIF1AN	false
69431	GCN	SYT15 (GCN) NIF3L1	false
69432	GCN	SYT15 (GCN) TGFBRAP1	false
69433	GCN	SYT15 (GCN) ZSCAN25	false
69434	GCN	SYT15 (GCN) CPT2	false
69435	GCN	SYT15 (GCN) KDM4A	false
69436	GCN	SYT15 (GCN) SMG8	false
69437	GCN	SYT15 (GCN) DCLRE1A	false
69438	GCN	SYT15 (GCN) QDPR	false
69439	GCN	SYT15 (GCN) BPNT1	false
69440	GCN	SYT15 (GCN) SPHK2	false
69441	GCN	SYT15 (GCN) TDRKH	false
69442	GCN	SYT15 (GCN) FBXO27	false
69443	GCN	SYT15 (GCN) CA12	false
69444	GCN	SYT15 (GCN) THEM6	false
69445	GCN	SYT15 (GCN) TMEM192	false
69446	GCN	SYT15 (GCN) FZD8	false
69447	GCN	SYT15 (GCN) ECH1	false
69448	GCN	SYT15 (GCN) PARN	false
69449	GCN	SYT15 (GCN) C3orf33	false
69450	GCN	SYT15 (GCN) MRPS23	false
69451	GCN	SYT15 (GCN) SUOX	false
69452	GCN	SYT15 (GCN) BDH1	false
69453	GCN	SYT15 (GCN) MANEAL	false
69454	GCN	SYT15 (GCN) PEX3	false
69455	GCN	SYT15 (GCN) PTPLAD1	false
69456	GCN	SYT15 (GCN) ZDHHC12	false
69457	GCN	SYT15 (GCN) ZNF319	false
69458	GCN	SYT15 (GCN) CYB5RL	false
69459	GCN	SYT15 (GCN) LSM14B	false
69460	GCN	SYT15 (GCN) AGPAT2	false
69461	GCN	SYT15 (GCN) SCAMP3	false
69462	GCN	SYT15 (GCN) C5orf63	false
69463	GCN	SYT15 (GCN) LRRC47	false
69464	GCN	SYT15 (GCN) BRI3	false
69465	GCN	SYT15 (GCN) FTSJ2	false
69466	GCN	SYT15 (GCN) TBCC	false
69467	GCN	SYT15 (GCN) AIFM1	false
69468	GCN	SYT15 (GCN) AASDH	false
69469	GCN	SYT15 (GCN) CLP1	false
69470	GCN	SYT15 (GCN) CENPBD1	false
69471	GCN	SYT15 (GCN) SEMA4F	false
69472	GCN	SYT15 (GCN) KIAA1279	false
69473	GCN	SYT15 (GCN) DBR1	false
69474	GCN	SYT15 (GCN) HSDL1	false
69475	GCN	SYT15 (GCN) TMEM41A	false
69476	GCN	SYT15 (GCN) CHAMP1	false
69477	GCN	SYT15 (GCN) ARHGEF19	false
69478	GCN	SYT15 (GCN) MRPS9	false
69479	GCN	SYT15 (GCN) MFSD2A	false
69480	GCN	SYT15 (GCN) C11orf1	false
69481	GCN	SYT15 (GCN) VPS33A	false
69482	GCN	SYT15 (GCN) BLNK	false
69483	GCN	SYT15 (GCN) CCDC97	false
69484	GCN	SYT15 (GCN) RDH13	false
69485	GCN	SYT15 (GCN) PRIM1	false
69486	GCN	SYT15 (GCN) TMEM141	false
69487	GCN	SYT15 (GCN) CLPTM1L	false
69488	GCN	SYT15 (GCN) RBM47	false
69489	GCN	SYT15 (GCN) B3GNT7	false
69490	GCN	SYT15 (GCN) KIAA0196	false
69491	GCN	SYT15 (GCN) USP18	false
69492	GCN	SYT15 (GCN) C1orf233	false
69493	GCN	SYT15 (GCN) PRKAG1	false
69494	GCN	SYT15 (GCN) IDH1	false
69495	GCN	SYT15 (GCN) POLR3B	false
69496	GCN	SYT15 (GCN) MOCS3	false
69497	GCN	SYT15 (GCN) ALG1	false
69498	GCN	SYT15 (GCN) FAM217B	false
69499	GCN	SYT15 (GCN) TAF6L	false
69500	GCN	SYT15 (GCN) TFB2M	false
69501	GCN	SYT15 (GCN) LRRC8E	false
69502	GCN	SYT15 (GCN) SPDYE3	false
69503	GCN	SYT15 (GCN) ULK3	false
69504	GCN	SYT15 (GCN) ZSWIM1	false
69505	GCN	SYT15 (GCN) SLC38A7	false
69506	GCN	SYT15 (GCN) AL591479.1	false
69507	GCN	SYT15 (GCN) SNTB1	false
69508	GCN	SYT15 (GCN) POLR3C	false
69509	GCN	SYT15 (GCN) AP5S1	false
69510	GCN	SYT15 (GCN) ZNF212	false
69511	GCN	SYT15 (GCN) SPSB2	false
69512	GCN	SYT15 (GCN) ARHGAP35	false
69513	GCN	SYT15 (GCN) C14orf1	false
69514	GCN	SYT15 (GCN) DBT	false
69515	GCN	SYT15 (GCN) SNX30	false
69516	GCN	SYT15 (GCN) POLR3H	false
69517	GCN	SYT15 (GCN) ZBTB45	false
69518	GCN	SYT15 (GCN) PATZ1	false
69519	GCN	SYT15 (GCN) ZNF517	false
69520	GCN	SYT15 (GCN) PAXIP1	false
69521	GCN	SYT15 (GCN) PPL	false
69522	GCN	SYT15 (GCN) ALDH4A1	false
69523	GCN	SYT15 (GCN) C6orf203	false
69524	GCN	SYT15 (GCN) MBIP	false
69525	GCN	SYT15 (GCN) ARRB1	false
69526	GCN	SYT15 (GCN) PAK6	false
69527	GCN	SYT15 (GCN) CPM	false
69528	GCN	SYT15 (GCN) PCYT2	false
69529	GCN	SYT15 (GCN) DHTKD1	false
69530	GCN	SYT15 (GCN) PTK6	false
69531	GCN	SYT15 (GCN) EBP	false
69532	GCN	SYT15 (GCN) ADI1	false
69533	GCN	SYT15 (GCN) TMEM245	false
69534	GCN	SYT15 (GCN) RNF26	false
69535	GCN	SYT15 (GCN) ADH5	false
69536	GCN	SYT15 (GCN) IPP	false
69537	GCN	SYT15 (GCN) ZBED6CL	false
69538	GCN	SYT15 (GCN) NSDHL	false
69539	GCN	SYT15 (GCN) SEC24C	false
69540	GCN	SYT15 (GCN) GOPC	false
69541	GCN	SYT15 (GCN) NAIF1	false
69542	GCN	SYT15 (GCN) ASB8	false
69543	GCN	SYT15 (GCN) GCDH	false
69544	GCN	SYT15 (GCN) ZNF362	false
69545	GCN	SYT15 (GCN) DNASE1L1	false
69546	GCN	SYT15 (GCN) FHDC1	false
69547	GCN	SYT15 (GCN) TMEM164	false
69548	GCN	SYT15 (GCN) RILP	false
69549	GCN	SYT15 (GCN) ELMO3	false
69550	GCN	SYT15 (GCN) CLN3	false
69551	GCN	SYT15 (GCN) IRF2BP1	false
69552	GCN	SYT15 (GCN) EHHADH	false
69553	GCN	SYT15 (GCN) C15orf52	false
69554	GCN	SYT15 (GCN) RPH3AL	false
69555	GCN	SYT15 (GCN) SCD	false
69556	GCN	SYT15 (GCN) COG2	false
69557	GCN	SYT15 (GCN) PANK1	false
69558	GCN	SYT15 (GCN) HSD17B4	false
69559	GCN	SYT15 (GCN) ASPSCR1	false
69560	GCN	SYT15 (GCN) SMIM1	false
69561	GCN	SYT15 (GCN) PRR15L	false
69562	GCN	SYT15 (GCN) SFXN2	false
69563	GCN	SYT15 (GCN) VPS4B	false
69564	GCN	SYT15 (GCN) HYAL1	false
69565	GCN	SYT15 (GCN) DNAJB12	false
69566	GCN	SYT15 (GCN) ABCC6	false
69567	GCN	SYT15 (GCN) KANK1	false
69568	GCN	SYT15 (GCN) RAB40C	false
69569	GCN	SYT15 (GCN) DHCR24	false
69570	GCN	SYT15 (GCN) TLCD1	false
69571	GCN	SYT15 (GCN) SEZ6L2	false
69572	GCN	SYT15 (GCN) GALE	false
69573	GCN	SYT15 (GCN) AATK	false
69574	GCN	SYT15 (GCN) MVB12B	false
69575	GCN	SYT15 (GCN) ALDH3B1	false
69576	GCN	SYT15 (GCN) FAM105A	false
69577	GCN	SYT15 (GCN) GGT1	false
69578	GCN	SYT15 (GCN) PIGM	false
69579	GCN	SYT15 (GCN) SLC27A3	false
69580	GCN	SYT15 (GCN) TFAP2C	false
69581	GCN	SYT15 (GCN) FOXA1	false
69582	GCN	SYT15 (GCN) CNPPD1	false
69583	GCN	SYT15 (GCN) DOK4	false
69584	GCN	SYT15 (GCN) GUCD1	false
69585	GCN	SYT15 (GCN) SOX9	false
69586	GCN	SYT15 (GCN) NECAB3	false
69587	GCN	SYT15 (GCN) MMAB	false
69588	GCN	SYT15 (GCN) TSNARE1	false
69589	GCN	SYT15 (GCN) MPST	false
69590	GCN	SYT15 (GCN) TYMP	false
69591	GCN	TMEM177 (GCN) ALG3	false
69592	GCN	TMEM177 (GCN) DOLPP1	false
69593	GCN	TMEM177 (GCN) MRPS12	false
69594	GCN	TMEM177 (GCN) GMPPA	false
69595	GCN	TMEM177 (GCN) ARMC6	false
69596	GCN	TMEM177 (GCN) PES1	false
69597	GCN	TMEM177 (GCN) C1QBP	false
69598	GCN	TMEM177 (GCN) MRPL15	false
69599	GCN	TMEM177 (GCN) ALG1	false
69600	GCN	TMEM177 (GCN) AP5S1	false
69601	GCN	TMEM177 (GCN) ADSL	false
69602	GCN	TMEM177 (GCN) FARSA	false
69603	GCN	TMEM177 (GCN) MFSD5	false
69604	GCN	TMEM177 (GCN) FAM86A	false
69605	GCN	TMEM177 (GCN) DCTPP1	false
69606	GCN	TMEM177 (GCN) TSFM	false
69607	GCN	TMEM177 (GCN) AIFM1	false
69608	GCN	TMEM177 (GCN) C9orf69	false
69609	GCN	TMEM177 (GCN) AIMP2	false
69610	GCN	TMEM177 (GCN) GNPDA1	false
69611	GCN	TMEM177 (GCN) UMPS	false
69612	GCN	TMEM177 (GCN) WDR12	false
69613	GCN	TMEM177 (GCN) CCDC71	false
69614	GCN	TMEM177 (GCN) FAM136A	false
69615	GCN	TMEM177 (GCN) SLC52A2	false
69616	GCN	TMEM177 (GCN) SCAMP3	false
69617	GCN	TMEM177 (GCN) MDH2	false
69618	GCN	TMEM177 (GCN) GINS1	false
69619	GCN	TMEM177 (GCN) CCNB1	false
69620	GCN	TMEM177 (GCN) PRPF19	false
69621	GCN	TMEM177 (GCN) PSMG3	false
69622	GCN	TMEM177 (GCN) TACO1	false
69623	GCN	TMEM177 (GCN) C19orf48	false
69624	GCN	TMEM177 (GCN) MMACHC	false
69625	GCN	TMEM177 (GCN) FTSJ2	false
69626	GCN	TMEM177 (GCN) GTF3C6	false
69627	GCN	TMEM177 (GCN) DDOST	false
69628	GCN	TMEM177 (GCN) SLC39A3	false
69629	GCN	TMEM177 (GCN) CENPBD1	false
69630	GCN	TMEM177 (GCN) COPG1	false
69631	GCN	TMEM177 (GCN) PYCRL	false
69632	GCN	TMEM177 (GCN) MRPS35	false
69633	GCN	TMEM177 (GCN) VPS33A	false
69634	GCN	TMEM177 (GCN) MRPL46	false
69635	GCN	TMEM177 (GCN) TFB2M	false
69636	GCN	TMEM177 (GCN) YKT6	false
69637	GCN	TMEM177 (GCN) DNAJA3	false
69638	GCN	TMEM177 (GCN) EARS2	false
69639	GCN	TMEM177 (GCN) C16orf59	false
69640	GCN	TMEM177 (GCN) ERAL1	false
69641	GCN	TMEM177 (GCN) MRPL3	false
69642	GCN	TMEM177 (GCN) AKR1A1	false
69643	GCN	TMEM177 (GCN) TBL2	false
69644	GCN	TMEM177 (GCN) COPE	false
69645	GCN	TMEM177 (GCN) PSMD8	false
69646	GCN	TMEM177 (GCN) MPV17	false
69647	GCN	TMEM177 (GCN) PAFAH1B3	false
69648	GCN	TMEM177 (GCN) SLC35B1	false
69649	GCN	TMEM177 (GCN) ECHS1	false
69650	GCN	TMEM177 (GCN) VPS18	false
69651	GCN	TMEM177 (GCN) SLC25A11	false
69652	GCN	TMEM177 (GCN) TMEM69	false
69653	GCN	TMEM177 (GCN) MRPL36	false
69654	GCN	TMEM177 (GCN) AP1S1	false
69655	GCN	TMEM177 (GCN) PDCD2L	false
69656	GCN	TMEM177 (GCN) SNRPC	false
69657	GCN	TMEM177 (GCN) SIGLEC10	false
69658	GCN	TMEM177 (GCN) CYB561D2	false
69659	GCN	TMEM177 (GCN) APEX1	false
69660	GCN	TMEM177 (GCN) PRDX4	false
69661	GCN	TMEM177 (GCN) EXOSC2	false
69662	GCN	TMEM177 (GCN) APEH	false
69663	GCN	TMEM177 (GCN) PCNA	false
69664	GCN	TMEM177 (GCN) CPT2	false
69665	GCN	TMEM177 (GCN) ABCB8	false
69666	GCN	TMEM177 (GCN) PPP1CA	false
69667	GCN	TMEM177 (GCN) MUL1	false
69668	GCN	TMEM177 (GCN) SLC36A1	false
69669	GCN	TMEM177 (GCN) CSTF2	false
69670	GCN	TMEM177 (GCN) PSMG1	false
69671	GCN	TMEM177 (GCN) TIMM21	false
69672	GCN	TMEM177 (GCN) JAGN1	false
69673	GCN	TMEM177 (GCN) KCNJ15	false
69674	GCN	TMEM177 (GCN) NUBP1	false
69675	GCN	TMEM177 (GCN) ARPC1B	false
69676	GCN	TMEM177 (GCN) SNUPN	false
69677	GCN	TMEM177 (GCN) PUF60	false
69678	GCN	TMEM177 (GCN) SLC25A10	false
69679	GCN	TMEM177 (GCN) ELP3	false
69680	GCN	TMEM177 (GCN) ELOVL1	false
69681	GCN	TMEM177 (GCN) TIMELESS	false
69682	GCN	TMEM177 (GCN) MIS18A	false
69683	GCN	TMEM177 (GCN) GTF2H3	false
69684	GCN	TMEM177 (GCN) LMAN2	false
69685	GCN	TMEM177 (GCN) TRAPPC1	false
69686	GCN	TMEM177 (GCN) PTCD2	false
69687	GCN	TMEM177 (GCN) LYRM2	false
69688	GCN	TMEM177 (GCN) MPI	false
69689	GCN	TMEM177 (GCN) MECR	false
69690	GCN	TMEM177 (GCN) SNRNP40	false
69691	GCN	TMEM177 (GCN) SAPCD2	false
69692	GCN	TMEM177 (GCN) RPS6KA4	false
69693	GCN	TMEM177 (GCN) PYCR1	false
69694	GCN	TMEM177 (GCN) GPAM	false
69695	GCN	TMEM177 (GCN) CCDC43	false
69696	GCN	TMEM177 (GCN) TPD52L2	false
69697	GCN	TMEM177 (GCN) DERL2	false
69698	GCN	TMEM177 (GCN) CDC123	false
69699	GCN	TMEM177 (GCN) LACTB2	false
69700	GCN	TMEM177 (GCN) PSMD2	false
69701	GCN	TMEM177 (GCN) PDHB	false
69702	GCN	TMEM177 (GCN) CNDP2	false
69703	GCN	TMEM177 (GCN) C6orf211	false
69704	GCN	TMEM177 (GCN) SRD5A3	false
69705	GCN	TMEM177 (GCN) GALNT10	false
69706	GCN	TMEM177 (GCN) FAM173A	false
69707	GCN	TMEM177 (GCN) PET112	false
69708	GCN	TMEM177 (GCN) EIF3B	false
69709	GCN	TMEM177 (GCN) ACAD9	false
69710	GCN	TMEM177 (GCN) DAP3	false
69711	GCN	TMEM177 (GCN) AAR2	false
69712	GCN	TMEM177 (GCN) TMEM141	false
69713	GCN	TMEM177 (GCN) SLC38A7	false
69714	GCN	TMEM177 (GCN) CCT3	false
69715	GCN	TMEM177 (GCN) PRKAG1	false
69716	GCN	TMEM177 (GCN) PLGRKT	false
69717	GCN	TMEM177 (GCN) DCAF13	false
69718	GCN	TMEM177 (GCN) NDC1	false
69719	GCN	TMEM177 (GCN) RPL7L1	false
69720	GCN	TMEM177 (GCN) ZWINT	false
69721	GCN	TMEM177 (GCN) ZMAT5	false
69722	GCN	TMEM177 (GCN) GPAA1	false
69723	GCN	TMEM177 (GCN) WBSCR16	false
69724	GCN	TMEM177 (GCN) ST14	false
69725	GCN	TMEM177 (GCN) THEM6	false
69726	GCN	TMEM177 (GCN) SLC35A4	false
69727	GCN	TMEM177 (GCN) SLC46A1	false
69728	GCN	TMEM177 (GCN) TBRG4	false
69729	GCN	TMEM177 (GCN) MRPL20	false
69730	GCN	TMEM177 (GCN) PTAFR	false
69731	GCN	TMEM177 (GCN) SNX17	false
69732	GCN	TMEM177 (GCN) TTC39A	false
69733	GCN	TMEM177 (GCN) COMMD9	false
69734	GCN	TMEM177 (GCN) TRUB2	false
69735	GCN	TMEM177 (GCN) POLDIP2	false
69736	GCN	TMEM177 (GCN) MTCH2	false
69737	GCN	TMEM177 (GCN) DHDDS	false
69738	GCN	TMEM177 (GCN) STOML2	false
69739	GCN	TMEM177 (GCN) DCPS	false
69740	GCN	TMEM177 (GCN) VAC14	false
69741	GCN	TMEM177 (GCN) TMEM147	false
69742	GCN	TMEM177 (GCN) MRPS11	false
69743	GCN	TMEM177 (GCN) TMA16	false
69744	GCN	TMEM177 (GCN) AURKA	false
69745	GCN	TMEM177 (GCN) FH	false
69746	GCN	TMEM177 (GCN) PIGO	false
69747	GCN	TMEM177 (GCN) SFXN2	false
69748	GCN	TMEM177 (GCN) PALB2	false
69749	GCN	TMEM177 (GCN) NOC2L	false
69750	GCN	TMEM177 (GCN) TSPAN3	false
69751	GCN	TMEM177 (GCN) C9orf64	false
69752	GCN	TMEM177 (GCN) RPUSD1	false
69753	GCN	TMEM177 (GCN) CTNS	false
69754	GCN	TMEM177 (GCN) RNASEH2A	false
69755	GCN	TMEM177 (GCN) COG2	false
69756	GCN	TMEM177 (GCN) ICMT	false
69757	GCN	TMEM177 (GCN) TSTA3	false
69758	GCN	TMEM177 (GCN) NUDT5	false
69759	GCN	TMEM177 (GCN) ELAC1	false
69760	GCN	TMEM177 (GCN) BRI3BP	false
69761	GCN	TMEM177 (GCN) MRPS22	false
69762	GCN	TMEM177 (GCN) SSR2	false
69763	GCN	TMEM177 (GCN) ZBTB45	false
69764	GCN	TMEM177 (GCN) RTCA	false
69765	GCN	TMEM177 (GCN) L3MBTL2	false
69766	GCN	TMEM177 (GCN) SHMT2	false
69767	GCN	TMEM177 (GCN) C1GALT1C1	false
69768	GCN	TMEM177 (GCN) PDCD6	false
69769	GCN	TMEM177 (GCN) SLC25A24	false
69770	GCN	TMEM177 (GCN) DHRS7B	false
69771	GCN	TMEM177 (GCN) LAMTOR2	false
69772	GCN	TMEM177 (GCN) NLN	false
69773	GCN	TMEM177 (GCN) FICD	false
69774	GCN	TMEM177 (GCN) PSMB7	false
69775	GCN	TMEM177 (GCN) MRPS16	false
69776	GCN	TMEM177 (GCN) B3GALT6	false
69777	GCN	TMEM177 (GCN) CNPY2	false
69778	GCN	TMEM177 (GCN) EXOSC5	false
69779	GCN	TMEM177 (GCN) TXNDC17	false
69780	GCN	TMEM177 (GCN) NSUN5	false
69781	GCN	TMEM177 (GCN) RFT1	false
69782	GCN	TMEM177 (GCN) NABP2	false
69783	GCN	TMEM177 (GCN) RP4-758J18.2	false
69784	GCN	TMEM177 (GCN) ATP5F1	false
69785	GCN	TMEM177 (GCN) TP53	false
69786	GCN	TMEM177 (GCN) CHEK1	false
69787	GCN	TMEM177 (GCN) TOMM22	false
69788	GCN	TMEM177 (GCN) RHBDD3	false
69789	GCN	TMEM177 (GCN) PGAM1	false
69790	GCN	TMEM177 (GCN) B4GALT7	false
69791	GCN	TMEM177 (GCN) ATP6V0D1	false
69792	GCN	TMEM177 (GCN) PEPD	false
69793	GCN	TMEM177 (GCN) URM1	false
69794	GCN	TMEM177 (GCN) BLVRB	false
69795	GCN	TMEM177 (GCN) DBI	false
69796	GCN	TMEM177 (GCN) METTL6	false
69797	GCN	TMEM177 (GCN) TANGO2	false
69798	GCN	KIAA0101 (GCN) HMMR	false
69799	GCN	KIAA0101 (GCN) CCNB1	false
69800	GCN	KIAA0101 (GCN) GINS1	false
69801	GCN	KIAA0101 (GCN) ZWINT	false
69802	GCN	KIAA0101 (GCN) GINS2	false
69803	GCN	KIAA0101 (GCN) FAM111B	false
69804	GCN	KIAA0101 (GCN) EME1	false
69805	GCN	KIAA0101 (GCN) CENPH	false
69806	GCN	KIAA0101 (GCN) ATP5G3	false
69807	GCN	KIAA0101 (GCN) PKMYT1	false
69808	GCN	KIAA0101 (GCN) RMI2	false
69809	GCN	KIAA0101 (GCN) AURKA	false
69810	GCN	KIAA0101 (GCN) MRPS15	false
69811	GCN	KIAA0101 (GCN) ASF1B	false
69812	GCN	KIAA0101 (GCN) POC1A	false
69813	GCN	CYB561D2 (GCN) PSMG3	false
69814	GCN	CYB561D2 (GCN) SAPCD2	false
69815	GCN	CYB561D2 (GCN) GINS1	false
69816	GCN	CYB561D2 (GCN) GPT2	false
69817	GCN	PTPN13 (GCN) SNX25	false
69818	GCN	PTPN13 (GCN) LRRK2	false
69819	GCN	PTPN13 (GCN) SLC25A10	false
69820	GCN	MCM4 (GCN) GINS2	false
69821	GCN	MCM4 (GCN) GINS1	false
69822	GCN	MCM4 (GCN) ZWINT	false
69823	GCN	MCM4 (GCN) CCNB1	false
69824	GCN	MCM4 (GCN) FAM111B	false
69825	GCN	MCM4 (GCN) HMMR	false
69826	GCN	MCM4 (GCN) FAM136A	false
69827	GCN	MCM4 (GCN) EME1	false
69828	GCN	MCM4 (GCN) IRAK1	false
69829	GCN	MCM4 (GCN) KIAA0101	false
69830	GCN	MCM4 (GCN) MRPL3	false
69831	GCN	MCM4 (GCN) CSTF2	false
69832	GCN	MCM4 (GCN) GMPPA	false
69833	GCN	MCM4 (GCN) C19orf48	false
69834	GCN	MCM4 (GCN) C1orf85	false
69835	GCN	MCM4 (GCN) DOLPP1	false
69836	GCN	MCM4 (GCN) WDR12	false
69837	GCN	MCM4 (GCN) FAM86A	false
69838	GCN	MCM4 (GCN) SCAMP3	false
69839	GCN	MCM4 (GCN) THNSL1	false
69840	GCN	MCM4 (GCN) SFXN4	false
69841	GCN	MCM4 (GCN) PRDX4	false
69842	GCN	MCM4 (GCN) PYCRL	false
69843	GCN	MCM4 (GCN) BLOC1S4	false
69844	GCN	MCM4 (GCN) MTX2	false
69845	GCN	MCM4 (GCN) AP1S1	false
69846	GCN	MCM4 (GCN) DAP3	false
69847	GCN	MCM4 (GCN) SLC5A6	false
69848	GCN	MCM4 (GCN) CUL7	false
69849	GCN	MCM4 (GCN) AIMP2	false
69850	GCN	MCM4 (GCN) FOXRED1	false
69851	GCN	MCM4 (GCN) PCCB	false
69852	GCN	MCM4 (GCN) FUNDC1	false
69853	GCN	MCM4 (GCN) TSSC1	false
69854	GCN	MCM4 (GCN) YKT6	false
69855	GCN	MCM4 (GCN) SLC25A10	false
69856	GCN	MCM4 (GCN) POLR1C	false
69857	GCN	MCM4 (GCN) TBRG4	false
69858	GCN	MCM4 (GCN) DCTPP1	false
69859	GCN	MCM4 (GCN) SLC35B1	false
69860	GCN	MCM4 (GCN) APOA1BP	false
69861	GCN	MCM4 (GCN) TSFM	false
69862	GCN	MCM4 (GCN) METTL1	false
69863	GCN	MCM4 (GCN) DNAJA3	false
69864	GCN	MCM4 (GCN) PCBD2	false
69865	GCN	MCM4 (GCN) IDH1	false
69866	GCN	MCM4 (GCN) ASAH2B	false
69867	GCN	MCM4 (GCN) DENR	false
69868	GCN	MCM4 (GCN) SSR1	false
69869	GCN	MCM4 (GCN) PSMD4	false
69870	GCN	MCM4 (GCN) AURKA	false
69871	GCN	MCM4 (GCN) SHMT2	false
69872	GCN	MCM4 (GCN) RMI2	false
69873	GCN	MCM4 (GCN) TMCO1	false
69874	GCN	MCM4 (GCN) BRCC3	false
69875	GCN	MCM4 (GCN) PSAT1	false
69876	GCN	MCM4 (GCN) SSR2	false
69877	GCN	MCM4 (GCN) NLN	false
69878	GCN	MCM4 (GCN) PALB2	false
69879	GCN	MCM4 (GCN) NOC2L	false
69880	GCN	MCM4 (GCN) POLR2D	false
69881	GCN	MCM4 (GCN) HMBS	false
69882	GCN	MCM4 (GCN) MFSD9	false
69883	GCN	MCM4 (GCN) DECR2	false
69884	GCN	MCM4 (GCN) TRUB2	false
69885	GCN	MCM4 (GCN) PLEK2	false
69886	GCN	MRPL3 (GCN) SLC35C1	false
69887	GCN	MRPL3 (GCN) GALNT10	false
69888	GCN	MRPL3 (GCN) FAM86A	false
69889	GCN	MRPL3 (GCN) PYCR1	false
69890	GCN	MRPL3 (GCN) SLC35B1	false
69891	GCN	MRPL3 (GCN) LMAN2	false
69892	GCN	MRPL3 (GCN) GINS1	false
69893	GCN	MRPL3 (GCN) SAPCD2	false
69894	GCN	MRPL3 (GCN) MACROD2	false
69895	GCN	MRPL3 (GCN) ALPL	false
69896	GCN	MRPL3 (GCN) PSMG3	false
69897	GCN	MRPL3 (GCN) FICD	false
69898	GCN	MRPL3 (GCN) PDIA4	false
69899	GCN	MRPL3 (GCN) TRAM1	false
69900	GCN	MRPL3 (GCN) NLN	false
69901	GCN	MRPL3 (GCN) RCC1	false
69902	GCN	MRPL3 (GCN) ATIC	false
69903	GCN	MRPL3 (GCN) CDC20	false
69904	GCN	EPDR1 (GCN) TFB2M	false
69905	GCN	EPDR1 (GCN) SLC25A10	false
69906	GCN	EPDR1 (GCN) TMEM177	false
69907	GCN	EPDR1 (GCN) BRI3BP	false
69908	GCN	EPDR1 (GCN) TMEM164	false
69909	GCN	EPDR1 (GCN) LAMP3	false
69910	GCN	SKA3 (GCN) FAM64A	false
69911	GCN	SKA3 (GCN) CDC25C	false
69912	GCN	SKA3 (GCN) XRCC2	false
69913	GCN	EME1 (GCN) GINS1	false
69914	GCN	EME1 (GCN) ZWINT	false
69915	GCN	EME1 (GCN) GINS2	false
69916	GCN	EME1 (GCN) HMMR	false
69917	GCN	EME1 (GCN) SAPCD2	false
69918	GCN	EME1 (GCN) SLC25A10	false
69919	GCN	EME1 (GCN) RMI2	false
69920	GCN	EME1 (GCN) NLN	false
69921	GCN	AIFM1 (GCN) SAPCD2	false
69922	GCN	AIFM1 (GCN) CCNB1	false
69923	GCN	AIFM1 (GCN) GINS1	false
69924	GCN	AIFM1 (GCN) C16orf59	false
69925	GCN	AIFM1 (GCN) WDR12	false
69926	GCN	AIFM1 (GCN) GINS2	false
69927	GCN	AIFM1 (GCN) PYCR1	false
69928	GCN	AIFM1 (GCN) ZWINT	false
69929	GCN	AIFM1 (GCN) MRPL3	false
69930	GCN	AIFM1 (GCN) PAFAH1B3	false
69931	GCN	AIFM1 (GCN) HMMR	false
69932	GCN	AIFM1 (GCN) KIAA0101	false
69933	GCN	AIFM1 (GCN) PKMYT1	false
69934	GCN	AIFM1 (GCN) ASF1B	false
69935	GCN	AIFM1 (GCN) AURKA	false
69936	GCN	AIFM1 (GCN) PSAT1	false
69937	GCN	AIFM1 (GCN) FOXM1	false
69938	GCN	AIFM1 (GCN) RCC1	false
69939	GCN	OIP5 (GCN) ZWINT	false
69940	GCN	OIP5 (GCN) HMMR	false
69941	GCN	OIP5 (GCN) SAPCD2	false
69942	GCN	OIP5 (GCN) CCNB1	false
69943	GCN	OIP5 (GCN) KIAA0101	false
69944	GCN	OIP5 (GCN) FOXM1	false
69945	GCN	OIP5 (GCN) RAD51	false
69946	GCN	OIP5 (GCN) KIF20A	false
69947	GCN	OIP5 (GCN) ASF1B	false
69948	GCN	OIP5 (GCN) POC1A	false
69949	GCN	OIP5 (GCN) PLK1	false
69950	GCN	OIP5 (GCN) CHEK1	false
69951	GCN	AGPAT2 (GCN) SLC25A10	false
69952	GCN	AGPAT2 (GCN) TMEM184A	false
69953	GCN	AAR2 (GCN) SLC25A10	false
69954	GCN	FLAD1 (GCN) PSMG3	false
69955	GCN	FLAD1 (GCN) GMPPA	false
69956	GCN	FLAD1 (GCN) TBRG4	false
69957	GCN	FLAD1 (GCN) SLC52A2	false
69958	GCN	FLAD1 (GCN) MRPL4	false
69959	GCN	FLAD1 (GCN) NCLN	false
69960	GCN	FLAD1 (GCN) MON1A	false
69961	GCN	FLAD1 (GCN) AKR1A1	false
69962	GCN	FLAD1 (GCN) YIF1A	false
69963	GCN	FLAD1 (GCN) FAM86A	false
69964	GCN	FLAD1 (GCN) E2F4	false
69965	GCN	FLAD1 (GCN) SLC25A11	false
69966	GCN	FLAD1 (GCN) TMEM177	false
69967	GCN	FLAD1 (GCN) RER1	false
69968	GCN	FLAD1 (GCN) MAP2K2	false
69969	GCN	FLAD1 (GCN) DDX41	false
69970	GCN	FLAD1 (GCN) EIF3B	false
69971	GCN	FLAD1 (GCN) CCDC137	false
69972	GCN	FLAD1 (GCN) DNAJA3	false
69973	GCN	FLAD1 (GCN) FAM136A	false
69974	GCN	FLAD1 (GCN) C19orf48	false
69975	GCN	FLAD1 (GCN) ERAL1	false
69976	GCN	FLAD1 (GCN) SF3B5	false
69977	GCN	FLAD1 (GCN) PES1	false
69978	GCN	FLAD1 (GCN) PYCRL	false
69979	GCN	FLAD1 (GCN) MRPL36	false
69980	GCN	FLAD1 (GCN) ARPC1B	false
69981	GCN	FLAD1 (GCN) NOP56	false
69982	GCN	FLAD1 (GCN) THOP1	false
69983	GCN	FLAD1 (GCN) CYB561D2	false
69984	GCN	FLAD1 (GCN) SLC35B1	false
[truncated: 12,114 more rows]
