# Supplementary material
Source: publisher figshare collection journal article supplement (https://springernature.figshare.com/ndownloader/files/35041376)
Supplement: Supplementary file 1 [file 35041376 › CytoscapeSession-2021_06_28-02_05/tables/66422-lung_GRN4GTEx_normal.txt/LOCAL_ATTRS-org.cytoscape.model.CyNode-lung_GRN4GTEx_normal.txt+default+node.cytable]

CyCSV-Version	1
SUID	name	selected	Type
java.lang.Long	java.lang.String	java.lang.Boolean	java.lang.String
			mutable
lung_GRN4GTEx_normal.txt default node
66432	ELK4	false	TF
66433	ABCA3	false	GCN_NODE
66434	FMO5	false	GCN_NODE
66435	ZWINT	false	GCN_NODE
66436	PLA2G4F	false	GCN_NODE
66437	SNX25	false	GCN_NODE
66438	FAM111B	false	GCN_NODE
66439	CCNB1	false	GCN_NODE
66440	CCT3	false	GCN_NODE
66441	ALG1	false	GCN_NODE
66442	SLC52A2	false	GCN_NODE
66443	C16orf59	false	GCN_NODE
66444	MCM2	false	GCN_NODE
66445	VSIG4	false	GCN_NODE
66446	SLC25A10	false	GCN_NODE
66447	SAPCD2	false	GCN_NODE
66448	PDHB	false	GCN_NODE
66449	MPDU1	false	GCN_NODE
66450	TMEM163	false	GCN_NODE
66451	TIMELESS	false	GCN_NODE
66452	HMMR	false	GCN_NODE
66453	FITM2	false	GCN_NODE
66454	LRRK2	false	GCN_NODE
66455	GINS2	false	GCN_NODE
66456	TFB2M	false	GCN_NODE
66457	LYRM2	false	GCN_NODE
66458	MON1A	false	GCN_NODE
66459	SYT15	false	GCN_NODE
66460	TMEM177	false	GCN_NODE
66461	KIAA0101	false	GCN_NODE
66462	CYB561D2	false	GCN_NODE
66463	PTPN13	false	GCN_NODE
66464	MCM4	false	GCN_NODE
66465	MRPL3	false	GCN_NODE
66466	EPDR1	false	GCN_NODE
66467	SKA3	false	GCN_NODE
66468	EME1	false	GCN_NODE
66469	AIFM1	false	GCN_NODE
66470	OIP5	false	GCN_NODE
66471	AGPAT2	false	GCN_NODE
66472	AAR2	false	GCN_NODE
66473	FLAD1	false	GCN_NODE
66474	WDR12	false	GCN_NODE
66475	VPS18	false	GCN_NODE
66476	ALG3	false	GCN_NODE
66477	MARVELD3	false	GCN_NODE
66478	PCK2	false	GCN_NODE
66479	KCNK1	false	GCN_NODE
66480	MIS18A	false	GCN_NODE
66481	MEF2BNB	false	GCN_NODE
66482	FAM136A	false	GCN_NODE
66483	C21orf33	false	GCN_NODE
66484	TONSL	false	GCN_NODE
66485	B3GNT8	false	GCN_NODE
66486	NME6	false	GCN_NODE
66487	SLC38A7	false	GCN_NODE
66488	RNASE6	false	GCN_NODE
66489	FPR3	false	GCN_NODE
66490	DRAM1	false	GCN_NODE
66491	PRDX4	false	GCN_NODE
66492	DOLPP1	false	GCN_NODE
66493	MND1	false	GCN_NODE
66494	FAM203A	false	GCN_NODE
66495	TTC39A	false	GCN_NODE
66496	NUBP1	false	GCN_NODE
66497	PAFAH1B3	false	GCN_NODE
66498	ANKEF1	false	GCN_NODE
66499	S1PR4	false	GCN_NODE
66500	YIF1A	false	GCN_NODE
66501	TMED3	false	GCN_NODE
66502	CCDC71	false	GCN_NODE
66503	SLC39A8	false	GCN_NODE
66504	BDH1	false	GCN_NODE
66505	TRAIP	false	GCN_NODE
66506	APEH	false	GCN_NODE
66507	MANEAL	false	GCN_NODE
66508	SEC13	false	GCN_NODE
66509	C2	false	GCN_NODE
66510	GMPPA	false	GCN_NODE
66511	TMEM41A	false	GCN_NODE
66512	GSTA4	false	GCN_NODE
66513	MFSD2A	false	GCN_NODE
66514	BEX2	false	GCN_NODE
66515	DDOST	false	GCN_NODE
66516	FAM64A	false	GCN_NODE
66517	TMEM116	false	GCN_NODE
66518	SCAMP4	false	GCN_NODE
66519	APEX1	false	GCN_NODE
66520	GPR34	false	GCN_NODE
66521	MRM1	false	GCN_NODE
66522	HYOU1	false	GCN_NODE
66523	DPP3	false	GCN_NODE
66524	CAPN3	false	GCN_NODE
66525	COPZ1	false	GCN_NODE
66526	CHMP4C	false	GCN_NODE
66527	POLR2C	false	GCN_NODE
66528	SFXN4	false	GCN_NODE
66529	CCR1	false	GCN_NODE
66530	OCIAD2	false	GCN_NODE
66531	MUL1	false	GCN_NODE
66532	MRPS34	false	GCN_NODE
66533	AP1S1	false	GCN_NODE
66534	C1QBP	false	GCN_NODE
66535	LMAN2	false	GCN_NODE
66536	TMEM69	false	GCN_NODE
66537	SUOX	false	GCN_NODE
66538	DAP3	false	GCN_NODE
66539	CENPH	false	GCN_NODE
66540	SLC25A11	false	GCN_NODE
66541	LAIR1	false	GCN_NODE
66542	SAC3D1	false	GCN_NODE
66543	ATP5G3	false	GCN_NODE
66544	CLN6	false	GCN_NODE
66545	SLC46A1	false	GCN_NODE
66546	ACADS	false	GCN_NODE
66547	COPG1	false	GCN_NODE
66548	RNH1	false	GCN_NODE
66549	ERAL1	false	GCN_NODE
66550	CD33	false	GCN_NODE
66551	AKR1A1	false	GCN_NODE
66552	CD300LF	false	GCN_NODE
66553	PCNA	false	GCN_NODE
66554	FLRT3	false	GCN_NODE
66555	RENBP	false	GCN_NODE
66556	CSTF2	false	GCN_NODE
66557	SLC35B1	false	GCN_NODE
66558	RER1	false	GCN_NODE
66559	ILDR1	false	GCN_NODE
66560	GOT2	false	GCN_NODE
66561	PYCR1	false	GCN_NODE
66562	TMEM199	false	GCN_NODE
66563	FEM1A	false	GCN_NODE
66564	MID1IP1	false	GCN_NODE
66565	MLST8	false	GCN_NODE
66566	LSS	false	GCN_NODE
66567	MFAP3L	false	GCN_NODE
66568	PTCD1	false	GCN_NODE
66569	C19orf48	false	GCN_NODE
66570	FIGNL1	false	GCN_NODE
66571	PARP1	false	GCN_NODE
66572	CDK5	false	GCN_NODE
66573	LIMS2	false	GCN_NODE
66574	TIMM13	false	GCN_NODE
66575	CPSF3	false	GCN_NODE
66576	COQ9	false	GCN_NODE
66577	C3AR1	false	GCN_NODE
66578	THEM6	false	GCN_NODE
66579	C1orf85	false	GCN_NODE
66580	GBA	false	GCN_NODE
66581	NECAB1	false	GCN_NODE
66582	HYLS1	false	GCN_NODE
66583	ULK3	false	GCN_NODE
66584	DIEXF	false	GCN_NODE
66585	DNPH1	false	GCN_NODE
66586	SLC35C1	false	GCN_NODE
66587	BRI3	false	GCN_NODE
66588	CLEC14A	false	GCN_NODE
66589	KCNJ15	false	GCN_NODE
66590	SYS1	false	GCN_NODE
66591	SRD5A3	false	GCN_NODE
66592	CTSA	false	GCN_NODE
66593	METTL13	false	GCN_NODE
66594	PTAFR	false	GCN_NODE
66595	C9orf156	false	GCN_NODE
66596	ENC1	false	GCN_NODE
66597	GSTZ1	false	GCN_NODE
66598	MACROD2	false	GCN_NODE
66599	COPE	false	GCN_NODE
66600	FUT3	false	GCN_NODE
66601	THNSL1	false	GCN_NODE
66602	NAT10	false	GCN_NODE
66603	CNDP2	false	GCN_NODE
66604	RBM47	false	GCN_NODE
66605	NDC1	false	GCN_NODE
66606	TRIP13	false	GCN_NODE
66607	SLC35A4	false	GCN_NODE
66608	TFAP4	false	GCN_NODE
66609	TMEM79	false	GCN_NODE
66610	FAM173A	false	GCN_NODE
66611	COX5A	false	GCN_NODE
66612	LYL1	false	GCN_NODE
66613	FAM86A	false	GCN_NODE
66614	SNX17	false	GCN_NODE
66615	APOBR	false	GCN_NODE
66616	RGS19	false	GCN_NODE
66617	UMPS	false	GCN_NODE
66618	IRAK1	false	GCN_NODE
66619	DCTPP1	false	GCN_NODE
66620	EARS2	false	GCN_NODE
66621	TDRKH	false	GCN_NODE
66622	TSSC1	false	GCN_NODE
66623	MPV17	false	GCN_NODE
66624	MRPS33	false	GCN_NODE
66625	SLC5A6	false	GCN_NODE
66626	MRPL15	false	GCN_NODE
66627	PRAM1	false	GCN_NODE
66628	MYO7A	false	GCN_NODE
66629	DCAF13	false	GCN_NODE
66630	SF3B5	false	GCN_NODE
66631	FAM86C1	false	GCN_NODE
66632	MYD88	false	GCN_NODE
66633	CCDC167	false	GCN_NODE
66634	UROS	false	GCN_NODE
66635	NRGN	false	GCN_NODE
66636	SSBP1	false	GCN_NODE
66637	GPD1L	false	GCN_NODE
66638	TTLL12	false	GCN_NODE
66639	GNPDA1	false	GCN_NODE
66640	CCM2L	false	GCN_NODE
66641	C1orf53	false	GCN_NODE
66642	AP5S1	false	GCN_NODE
66643	MDH2	false	GCN_NODE
66644	RPP40	false	GCN_NODE
66645	ECHS1	false	GCN_NODE
66646	SELPLG	false	GCN_NODE
66647	MMACHC	false	GCN_NODE
66648	FCGR1B	false	GCN_NODE
66649	ITGB2	false	GCN_NODE
66650	SEC23B	false	GCN_NODE
66651	ADSL	false	GCN_NODE
66652	FUNDC1	false	GCN_NODE
66653	ABCB8	false	GCN_NODE
66654	DYX1C1	false	GCN_NODE
66655	TTI2	false	GCN_NODE
66656	SEPHS2	false	GCN_NODE
66657	EGFL7	false	GCN_NODE
66658	MTX2	false	GCN_NODE
66659	MRPS12	false	GCN_NODE
66660	GLB1	false	GCN_NODE
66661	FBXO41	false	GCN_NODE
66662	GPX1	false	GCN_NODE
66663	MRPS27	false	GCN_NODE
66664	ESRP2	false	GCN_NODE
66665	KDELR1	false	GCN_NODE
66666	DENR	false	GCN_NODE
66667	FOXRED1	false	GCN_NODE
66668	C1orf233	false	GCN_NODE
66669	COX6B1	false	GCN_NODE
66670	AARS2	false	GCN_NODE
66671	TLR8	false	GCN_NODE
66672	ITPA	false	GCN_NODE
66673	PREP	false	GCN_NODE
66674	APOA1BP	false	GCN_NODE
66675	ICT1	false	GCN_NODE
66676	SPRYD4	false	GCN_NODE
66677	TMEM223	false	GCN_NODE
66678	FGR	false	GCN_NODE
66679	SYK	false	GCN_NODE
66680	CYB5RL	false	GCN_NODE
66681	MS4A7	false	GCN_NODE
66682	PARS2	false	GCN_NODE
66683	SLC7A7	false	GCN_NODE
66684	POLR3K	false	GCN_NODE
66685	SNRPC	false	GCN_NODE
66686	ARMC6	false	GCN_NODE
66687	ZFYVE19	false	GCN_NODE
66688	COMMD9	false	GCN_NODE
66689	AIF1	false	GCN_NODE
66690	DUOX1	false	GCN_NODE
66691	TRAPPC1	false	GCN_NODE
66692	WDR81	false	GCN_NODE
66693	SPHK2	false	GCN_NODE
66694	IRX2	false	GCN_NODE
66695	TMEM222	false	GCN_NODE
66696	PPP1CA	false	GCN_NODE
66697	PET112	false	GCN_NODE
66698	MFSD5	false	GCN_NODE
66699	SSR1	false	GCN_NODE
66700	PRPF19	false	GCN_NODE
66701	NLE1	false	GCN_NODE
66702	AP1B1	false	GCN_NODE
66703	EXO5	false	GCN_NODE
66704	FARSA	false	GCN_NODE
66705	TOR4A	false	GCN_NODE
66706	UQCRC1	false	GCN_NODE
66707	MRPL44	false	GCN_NODE
66708	LEO1	false	GCN_NODE
66709	ARHGEF19	false	GCN_NODE
66710	BLOC1S4	false	GCN_NODE
66711	PREB	false	GCN_NODE
66712	RAN	false	GCN_NODE
66713	TREM2	false	GCN_NODE
66714	ABRACL	false	GCN_NODE
66715	PDCD2L	false	GCN_NODE
66716	ARPC1B	false	GCN_NODE
66717	WBSCR16	false	GCN_NODE
66718	EMILIN2	false	GCN_NODE
66719	DOK2	false	GCN_NODE
66720	ST3GAL5	false	GCN_NODE
66721	ISCA2	false	GCN_NODE
66722	TKT	false	GCN_NODE
66723	ARHGAP30	false	GCN_NODE
66724	YKT6	false	GCN_NODE
66725	SDC1	false	GCN_NODE
66726	TMEM92	false	GCN_NODE
66727	ATP13A2	false	GCN_NODE
66728	MECR	false	GCN_NODE
66729	VPS11	false	GCN_NODE
66730	PES1	false	GCN_NODE
66731	MRPL4	false	GCN_NODE
66732	C19orf59	false	GCN_NODE
66733	RRP1B	false	GCN_NODE
66734	SLC25A4	false	GCN_NODE
66735	NDUFA8	false	GCN_NODE
66736	TMEM261	false	GCN_NODE
66737	DAK	false	GCN_NODE
66738	MRPS23	false	GCN_NODE
66739	FTSJ2	false	GCN_NODE
66740	PCBD2	false	GCN_NODE
66741	PLIN5	false	GCN_NODE
66742	XYLB	false	GCN_NODE
66743	DERL2	false	GCN_NODE
66744	C9orf69	false	GCN_NODE
66745	GRB2	false	GCN_NODE
66746	L2HGDH	false	GCN_NODE
66747	MTG1	false	GCN_NODE
66748	RABEP2	false	GCN_NODE
66749	MILR1	false	GCN_NODE
66750	TSFM	false	GCN_NODE
66751	DLAT	false	GCN_NODE
66752	CIAO1	false	GCN_NODE
66753	HDHD3	false	GCN_NODE
66754	BLNK	false	GCN_NODE
66755	GIMAP6	false	GCN_NODE
66756	MMP28	false	GCN_NODE
66757	CISD2	false	GCN_NODE
66758	MPI	false	GCN_NODE
66759	PCCB	false	GCN_NODE
66760	NFS1	false	GCN_NODE
66761	FAH	false	GCN_NODE
66762	POLR3B	false	GCN_NODE
66763	LACTB2	false	GCN_NODE
66764	ASAH1	false	GCN_NODE
66765	LCMT1	false	GCN_NODE
66766	CUL7	false	GCN_NODE
66767	PSMC2	false	GCN_NODE
66768	SNUPN	false	GCN_NODE
66769	ADORA3	false	GCN_NODE
66770	CPT2	false	GCN_NODE
66771	ATPAF1	false	GCN_NODE
66772	IDH1	false	GCN_NODE
66773	DOK3	false	GCN_NODE
66774	HN1	false	GCN_NODE
66775	GTF3C6	false	GCN_NODE
66776	ZDHHC12	false	GCN_NODE
66777	RAB42	false	GCN_NODE
66778	SCAMP3	false	GCN_NODE
66779	PSMD8	false	GCN_NODE
66780	SLC39A3	false	GCN_NODE
66781	TMEM141	false	GCN_NODE
66782	AIMP2	false	GCN_NODE
66783	TBL2	false	GCN_NODE
66784	FAM103A1	false	GCN_NODE
66785	C1orf162	false	GCN_NODE
66786	MAP2K2	false	GCN_NODE
66787	C11orf1	false	GCN_NODE
66788	IMMT	false	GCN_NODE
66789	MS4A4A	false	GCN_NODE
66790	TACO1	false	GCN_NODE
66791	ST14	false	GCN_NODE
66792	ACBD6	false	GCN_NODE
66793	PTCD2	false	GCN_NODE
66794	DDX41	false	GCN_NODE
66795	THAP8	false	GCN_NODE
66796	BRMS1	false	GCN_NODE
66797	RCCD1	false	GCN_NODE
66798	RRAGA	false	GCN_NODE
66799	GJA5	false	GCN_NODE
66800	PRR19	false	GCN_NODE
66801	TAF6L	false	GCN_NODE
66802	VPS33A	false	GCN_NODE
66803	GEMIN7	false	GCN_NODE
66804	IGSF6	false	GCN_NODE
66805	NUDT19	false	GCN_NODE
66806	NIF3L1	false	GCN_NODE
66807	PYCRL	false	GCN_NODE
66808	PDF	false	GCN_NODE
66809	NCLN	false	GCN_NODE
66810	MRPS35	false	GCN_NODE
66811	CDC123	false	GCN_NODE
66812	SDCCAG3	false	GCN_NODE
66813	MRPL27	false	GCN_NODE
66814	FA2H	false	GCN_NODE
66815	TSR3	false	GCN_NODE
66816	CD163	false	GCN_NODE
66817	TBCC	false	GCN_NODE
66818	ASAH2B	false	GCN_NODE
66819	ITGAM	false	GCN_NODE
66820	TPD52L2	false	GCN_NODE
66821	BRAT1	false	GCN_NODE
66822	SLC25A15	false	GCN_NODE
66823	TMEM106A	false	GCN_NODE
66824	TBXAS1	false	GCN_NODE
66825	METTL1	false	GCN_NODE
66826	CCDC137	false	GCN_NODE
66827	TBRG4	false	GCN_NODE
66828	B3GNT7	false	GCN_NODE
66829	PSMG3	false	GCN_NODE
66830	NDUFS1	false	GCN_NODE
66831	MRPL36	false	GCN_NODE
66832	FAM173B	false	GCN_NODE
66833	CD180	false	GCN_NODE
66834	FASTKD3	false	GCN_NODE
66835	CENPBD1	false	GCN_NODE
66836	COX10	false	GCN_NODE
66837	C10orf2	false	GCN_NODE
66838	ADCK1	false	GCN_NODE
66839	RPS6KA4	false	GCN_NODE
66840	POLR1B	false	GCN_NODE
66841	GPAA1	false	GCN_NODE
66842	TARS2	false	GCN_NODE
66843	COQ2	false	GCN_NODE
66844	HYAL2	false	GCN_NODE
66845	MLYCD	false	GCN_NODE
66846	ZNF469	false	GCN_NODE
66847	JAGN1	false	GCN_NODE
66848	ZNF696	false	GCN_NODE
66849	ELF4	false	TF
66850	NLRC4	false	GCN_NODE
66851	ECE2	false	GCN_NODE
66852	PKMYT1	false	GCN_NODE
66853	SNX30	false	GCN_NODE
66854	PBK	false	GCN_NODE
66855	ALOX5AP	false	GCN_NODE
66856	SNF8	false	GCN_NODE
66857	PXMP4	false	GCN_NODE
66858	B9D2	false	GCN_NODE
66859	POLDIP2	false	GCN_NODE
66860	PAQR4	false	GCN_NODE
66861	RNASEH2A	false	GCN_NODE
66862	ACAT1	false	GCN_NODE
66863	LAMTOR2	false	GCN_NODE
66864	EXOSC5	false	GCN_NODE
66865	ATP6V1F	false	GCN_NODE
66866	SRD5A1	false	GCN_NODE
66867	KCTD14	false	GCN_NODE
66868	C5	false	GCN_NODE
66869	MRPS11	false	GCN_NODE
66870	ALDH4A1	false	GCN_NODE
66871	EDEM2	false	GCN_NODE
66872	DHRS4L2	false	GCN_NODE
66873	CTNS	false	GCN_NODE
66874	IPO13	false	GCN_NODE
66875	TXN2	false	GCN_NODE
66876	EHMT2	false	GCN_NODE
66877	STAC3	false	GCN_NODE
66878	STOML2	false	GCN_NODE
66879	MRS2	false	GCN_NODE
66880	ACAD10	false	GCN_NODE
66881	ATP5F1	false	GCN_NODE
66882	JMJD4	false	GCN_NODE
66883	SPRYD7	false	GCN_NODE
66884	SSR2	false	GCN_NODE
66885	ACP5	false	GCN_NODE
66886	EXOSC4	false	GCN_NODE
66887	PGAM5	false	GCN_NODE
66888	EXOSC1	false	GCN_NODE
66889	PARK7	false	GCN_NODE
66890	TP53I3	false	GCN_NODE
66891	ETV6	false	TF
66892	ASF1B	false	GCN_NODE
66893	PDIA4	false	GCN_NODE
66894	FICD	false	GCN_NODE
66895	HM13	false	GCN_NODE
66896	PAK6	false	GCN_NODE
66897	CENPI	false	GCN_NODE
66898	STT3A	false	GCN_NODE
66899	ALG5	false	GCN_NODE
66900	TSPAN3	false	GCN_NODE
66901	METTL7B	false	GCN_NODE
66902	C14orf1	false	GCN_NODE
66903	AACS	false	GCN_NODE
66904	SIRT7	false	GCN_NODE
66905	SLC27A4	false	GCN_NODE
66906	TTPAL	false	GCN_NODE
66907	SLC1A4	false	GCN_NODE
66908	NSDHL	false	GCN_NODE
66909	C19orf24	false	GCN_NODE
66910	SMIM4	false	GCN_NODE
66911	TSTA3	false	GCN_NODE
66912	ANAPC11	false	GCN_NODE
66913	C17orf62	false	GCN_NODE
66914	MRPL13	false	GCN_NODE
66915	LRRC20	false	GCN_NODE
66916	DHDDS	false	GCN_NODE
66917	TMED1	false	GCN_NODE
66918	UQCC2	false	GCN_NODE
66919	CHPF2	false	GCN_NODE
66920	FRAT1	false	GCN_NODE
66921	FADD	false	GCN_NODE
66922	CORO1A	false	GCN_NODE
66923	CHCHD1	false	GCN_NODE
66924	NUDT5	false	GCN_NODE
66925	BIN2	false	GCN_NODE
66926	TACC3	false	GCN_NODE
66927	MRPL35	false	GCN_NODE
66928	C16orf70	false	GCN_NODE
66929	B4GALT7	false	GCN_NODE
66930	PHB	false	GCN_NODE
66931	ACOT1	false	GCN_NODE
66932	MYO1F	false	GCN_NODE
66933	APMAP	false	GCN_NODE
66934	SNRNP25	false	GCN_NODE
66935	EBP	false	GCN_NODE
66936	FAM118B	false	GCN_NODE
66937	MTCH2	false	GCN_NODE
66938	GCDH	false	GCN_NODE
66939	ACAA2	false	GCN_NODE
66940	SLC37A4	false	GCN_NODE
66941	ADAP1	false	GCN_NODE
66942	TCTA	false	GCN_NODE
66943	SLX4	false	GCN_NODE
66944	KLHL12	false	GCN_NODE
66945	VPS25	false	GCN_NODE
66946	INTS5	false	GCN_NODE
66947	FH	false	GCN_NODE
66948	PTK6	false	GCN_NODE
66949	SLC25A20	false	GCN_NODE
66950	SDHC	false	GCN_NODE
66951	AURKAIP1	false	GCN_NODE
66952	MRPL19	false	GCN_NODE
66953	COA6	false	GCN_NODE
66954	GLYCTK	false	GCN_NODE
66955	TBCE	false	GCN_NODE
66956	ATP5H	false	GCN_NODE
66957	CCT5	false	GCN_NODE
66958	TTI1	false	GCN_NODE
66959	PGBD4	false	GCN_NODE
66960	METTL6	false	GCN_NODE
66961	GMIP	false	GCN_NODE
66962	RPA3	false	GCN_NODE
66963	PSMD14	false	GCN_NODE
66964	INTS7	false	GCN_NODE
66965	GABPA	false	TF
66966	CDCA5	false	GCN_NODE
66967	SLC22A3	false	GCN_NODE
66968	TROAP	false	GCN_NODE
66969	AURKA	false	GCN_NODE
66970	FOXM1	false	GCN_NODE
66971	CISD3	false	GCN_NODE
66972	RAD51	false	GCN_NODE
66973	SHMT2	false	GCN_NODE
66974	SLC22A31	false	GCN_NODE
66975	RMI2	false	GCN_NODE
66976	RILP	false	GCN_NODE
66977	DTYMK	false	GCN_NODE
66978	PSAT1	false	GCN_NODE
66979	SPC25	false	GCN_NODE
66980	ZSWIM7	false	GCN_NODE
66981	HSD17B4	false	GCN_NODE
66982	LAMTOR1	false	GCN_NODE
66983	CYB5A	false	GCN_NODE
66984	MRPL37	false	GCN_NODE
66985	HK3	false	GCN_NODE
66986	NIPSNAP1	false	GCN_NODE
66987	TRUB2	false	GCN_NODE
66988	SGOL2	false	GCN_NODE
66989	NSF	false	GCN_NODE
66990	OSTC	false	GCN_NODE
66991	RPUSD1	false	GCN_NODE
66992	TMEM150B	false	GCN_NODE
66993	SFXN2	false	GCN_NODE
66994	TMEM164	false	GCN_NODE
66995	BRI3BP	false	GCN_NODE
66996	NUDT8	false	GCN_NODE
66997	NUDT16L1	false	GCN_NODE
66998	DCPS	false	GCN_NODE
66999	TMEM184A	false	GCN_NODE
67000	RABIF	false	GCN_NODE
67001	NLN	false	GCN_NODE
67002	YIF1B	false	GCN_NODE
67003	MRPL24	false	GCN_NODE
67004	C21orf67	false	GCN_NODE
67005	TMCO1	false	GCN_NODE
67006	HMBS	false	GCN_NODE
67007	SIGLEC9	false	GCN_NODE
67008	ZNF362	false	GCN_NODE
67009	COG2	false	GCN_NODE
67010	CD53	false	GCN_NODE
67011	SORBS3	false	GCN_NODE
67012	LYPLA1	false	GCN_NODE
67013	RBBP4	false	GCN_NODE
67014	EHHADH	false	GCN_NODE
67015	TMEM147	false	GCN_NODE
67016	PGLS	false	GCN_NODE
67017	FERMT3	false	GCN_NODE
67018	PUSL1	false	GCN_NODE
67019	ETFA	false	GCN_NODE
67020	MEGF9	false	GCN_NODE
67021	SMUG1	false	GCN_NODE
67022	HDAC3	false	GCN_NODE
67023	UQCRC2	false	GCN_NODE
67024	RAP2B	false	GCN_NODE
67025	FUT8	false	GCN_NODE
67026	NEU1	false	GCN_NODE
67027	SLC25A24	false	GCN_NODE
67028	ELMO3	false	GCN_NODE
67029	SLAMF8	false	GCN_NODE
67030	CECR5	false	GCN_NODE
67031	MFSD9	false	GCN_NODE
67032	FASTK	false	GCN_NODE
67033	SNAP47	false	GCN_NODE
67034	POLR2D	false	GCN_NODE
67035	DHRS7B	false	GCN_NODE
67036	BRCC3	false	GCN_NODE
67037	C19orf40	false	GCN_NODE
67038	TMEM144	false	GCN_NODE
67039	PGBD2	false	GCN_NODE
67040	BTF3L4	false	GCN_NODE
67041	CPOX	false	GCN_NODE
67042	FLVCR2	false	GCN_NODE
67043	TMA16	false	GCN_NODE
67044	ZNF195	false	GCN_NODE
67045	CLN3	false	GCN_NODE
67046	PALB2	false	GCN_NODE
67047	ARL1	false	GCN_NODE
67048	EIF2AK1	false	GCN_NODE
67049	CCDC58	false	GCN_NODE
67050	PDCD6	false	GCN_NODE
67051	HARBI1	false	GCN_NODE
67052	GPAM	false	GCN_NODE
67053	CHAF1A	false	GCN_NODE
67054	HYAL1	false	GCN_NODE
67055	OPLAH	false	GCN_NODE
67056	ZBTB9	false	GCN_NODE
67057	DOPEY2	false	GCN_NODE
67058	DPEP2	false	GCN_NODE
67059	PLEK2	false	GCN_NODE
67060	TMEM45B	false	GCN_NODE
67061	CCNL2	false	GCN_NODE
67062	DECR2	false	GCN_NODE
67063	LSM5	false	GCN_NODE
67064	RP11-345J4.5	false	GCN_NODE
67065	CCR2	false	GCN_NODE
67066	C5orf63	false	GCN_NODE
67067	ACOT13	false	GCN_NODE
67068	PIGO	false	GCN_NODE
67069	PIN1	false	GCN_NODE
67070	ZSWIM1	false	GCN_NODE
67071	NR2F2	false	TF
67072	KIF4A	false	GCN_NODE
67073	NABP2	false	GCN_NODE
67074	NR2F6	false	TF
67075	SKA1	false	GCN_NODE
67076	KIF20A	false	GCN_NODE
67077	FIBP	false	GCN_NODE
67078	SLC39A11	false	GCN_NODE
67079	NUP37	false	GCN_NODE
67080	CNP	false	GCN_NODE
67081	GHITM	false	GCN_NODE
67082	ISOC2	false	GCN_NODE
67083	NDUFAF1	false	GCN_NODE
67084	NDUFS8	false	GCN_NODE
67085	MGME1	false	GCN_NODE
67086	MRPS10	false	GCN_NODE
67087	NSUN5	false	GCN_NODE
67088	DBI	false	GCN_NODE
67089	GEMIN6	false	GCN_NODE
67090	SWSAP1	false	GCN_NODE
67091	TWF2	false	GCN_NODE
67092	GCSH	false	GCN_NODE
67093	DCTN5	false	GCN_NODE
67094	MED20	false	GCN_NODE
67095	MRPS15	false	GCN_NODE
67096	TOPORS	false	TF
67097	TXNDC17	false	GCN_NODE
67098	FEN1	false	GCN_NODE
67099	SCIMP	false	GCN_NODE
67100	GOT1	false	GCN_NODE
67101	SLC25A39	false	GCN_NODE
67102	TEX264	false	GCN_NODE
67103	MED8	false	GCN_NODE
67104	RPL26L1	false	GCN_NODE
67105	SNRPE	false	GCN_NODE
67106	LAGE3	false	GCN_NODE
67107	CNIH4	false	GCN_NODE
67108	PGAM1	false	GCN_NODE
67109	TUBA1C	false	GCN_NODE
67110	TANGO2	false	GCN_NODE
67111	RHOBTB2	false	GCN_NODE
67112	XRCC4	false	GCN_NODE
67113	ATP5G1	false	GCN_NODE
67114	WDR89	false	GCN_NODE
67115	SCLY	false	GCN_NODE
67116	PSMB4	false	GCN_NODE
67117	DARS2	false	GCN_NODE
67118	AP3M1	false	GCN_NODE
67119	ERF	false	TF
67120	PDIA6	false	GCN_NODE
67121	MVB12B	false	GCN_NODE
67122	ETV1	false	TF
67123	FCGR1A	false	GCN_NODE
67124	BRCA1	false	TF
67125	PCSK9	false	GCN_NODE
67126	LAMP3	false	GCN_NODE
67127	RPS6KA2	false	GCN_NODE
67128	ABCC6	false	GCN_NODE
67129	RAB40C	false	GCN_NODE
67130	TLCD1	false	GCN_NODE
67131	PNKD	false	GCN_NODE
67132	POLR3H	false	GCN_NODE
67133	CPM	false	GCN_NODE
67134	SURF4	false	GCN_NODE
67135	IDH2	false	GCN_NODE
67136	ALPL	false	GCN_NODE
67137	PPP1R14C	false	GCN_NODE
67138	SCD	false	GCN_NODE
67139	FAM195A	false	GCN_NODE
67140	DPM2	false	GCN_NODE
67141	RPH3AL	false	GCN_NODE
67142	CTDNEP1	false	GCN_NODE
67143	GPT2	false	GCN_NODE
67144	MLXIPL	false	GCN_NODE
67145	AATK	false	GCN_NODE
67146	KANK1	false	GCN_NODE
67147	PC	false	GCN_NODE
67148	TOMM40	false	GCN_NODE
67149	MRPS2	false	GCN_NODE
67150	EHF	false	TF
67151	VARS	false	GCN_NODE
67152	CHID1	false	GCN_NODE
67153	ETV3	false	TF
67154	IMPDH2	false	GCN_NODE
67155	ETV4	false	TF
67156	SMYD5	false	GCN_NODE
67157	NRF1	false	TF
67158	CDC45	false	GCN_NODE
67159	RRM2	false	GCN_NODE
67160	ELOF1	false	GCN_NODE
67161	GYPE	false	GCN_NODE
67162	NCF2	false	GCN_NODE
67163	FAM105A	false	GCN_NODE
67164	LRRC25	false	GCN_NODE
67165	CLPTM1L	false	GCN_NODE
67166	SLC30A6	false	GCN_NODE
67167	NPR1	false	GCN_NODE
67168	TBC1D2	false	GCN_NODE
67169	ZBTB33	false	TF
67170	FHDC1	false	GCN_NODE
67171	ALDH3B1	false	GCN_NODE
67172	TFAP2C	false	GCN_NODE
67173	C19orf10	false	GCN_NODE
67174	PEPD	false	GCN_NODE
67175	NAGLU	false	GCN_NODE
67176	URM1	false	GCN_NODE
67177	SERPINF2	false	GCN_NODE
67178	TCF19	false	GCN_NODE
67179	SMAGP	false	GCN_NODE
67180	CNPPD1	false	GCN_NODE
67181	TMEM204	false	GCN_NODE
67182	GCAT	false	GCN_NODE
67183	GUCD1	false	GCN_NODE
67184	AK1	false	GCN_NODE
67185	USF2	false	TF
67186	ACOXL	false	GCN_NODE
67187	MMAB	false	GCN_NODE
67188	TFCP2L1	false	GCN_NODE
67189	FGFR2	false	GCN_NODE
67190	ASL	false	GCN_NODE
67191	LSR	false	GCN_NODE
67192	CCDC94	false	GCN_NODE
67193	USP44	false	GCN_NODE
67194	DCAF11	false	GCN_NODE
67195	BCAT2	false	GCN_NODE
67196	MBIP	false	GCN_NODE
67197	C1orf172	false	GCN_NODE
67198	ALOX15B	false	GCN_NODE
67199	SLC31A2	false	GCN_NODE
67200	NECAB3	false	GCN_NODE
67201	FZD5	false	GCN_NODE
67202	STEAP3	false	GCN_NODE
67203	NUDT16	false	GCN_NODE
67204	TMEM180	false	GCN_NODE
67205	FASN	false	GCN_NODE
67206	SERINC2	false	GCN_NODE
67207	ADORA2B	false	GCN_NODE
67208	MTRR	false	GCN_NODE
67209	CRB3	false	GCN_NODE
67210	ATP6V0E1	false	GCN_NODE
67211	PHYH	false	GCN_NODE
67212	SLC26A9	false	GCN_NODE
67213	PRKCZ	false	GCN_NODE
67214	CNPY2	false	GCN_NODE
67215	METTL2A	false	GCN_NODE
67216	CYC1	false	GCN_NODE
67217	KLF13	false	GCN_NODE
67218	KIAA1522	false	GCN_NODE
67219	RAB20	false	GCN_NODE
67220	EEF1E1	false	GCN_NODE
67221	MLX	false	TF
67222	AHCY	false	GCN_NODE
67223	LTA4H	false	GCN_NODE
67224	SMARCC2	false	TF
67225	SASH3	false	GCN_NODE
67226	RRP36	false	GCN_NODE
67227	SPDL1	false	GCN_NODE
67228	UQCRQ	false	GCN_NODE
67229	SREBF2	false	TF
67230	USF1	false	TF
67231	PLK1	false	GCN_NODE
67232	POC1A	false	GCN_NODE
67233	RFC4	false	GCN_NODE
67234	GRHL2	false	GCN_NODE
67235	DFFA	false	GCN_NODE
67236	GALE	false	GCN_NODE
67237	TSPYL5	false	GCN_NODE
67238	ARL11	false	GCN_NODE
67239	MRPS16	false	GCN_NODE
67240	HMGB3	false	GCN_NODE
67241	SND1	false	GCN_NODE
67242	RCC1	false	GCN_NODE
67243	ATAD3C	false	GCN_NODE
67244	RPN2	false	GCN_NODE
67245	SLC25A16	false	GCN_NODE
67246	TMEM243	false	GCN_NODE
67247	ZNF691	false	GCN_NODE
67248	GALNT10	false	GCN_NODE
67249	CYP51A1	false	GCN_NODE
67250	SDHB	false	GCN_NODE
67251	PRDX3	false	GCN_NODE
67252	LGMN	false	GCN_NODE
67253	PFKFB2	false	GCN_NODE
67254	SQRDL	false	GCN_NODE
67255	FDFT1	false	GCN_NODE
67256	C6orf211	false	GCN_NODE
67257	ELOVL1	false	GCN_NODE
67258	ARNTL	false	TF
67259	SSR3	false	GCN_NODE
67260	ZBED3	false	GCN_NODE
67261	ELF5	false	TF
67262	MYPOP	false	TF
67263	TYMS	false	GCN_NODE
67264	CDC20	false	GCN_NODE
67265	MSTO1	false	GCN_NODE
67266	RHNO1	false	GCN_NODE
67267	PDCD11	false	GCN_NODE
67268	PRMT3	false	GCN_NODE
67269	TIMM8B	false	GCN_NODE
67270	TP53	false	GCN_NODE
67271	PSMB2	false	GCN_NODE
67272	ZW10	false	GCN_NODE
67273	NUDT22	false	GCN_NODE
67274	CENPM	false	GCN_NODE
67275	CENPO	false	GCN_NODE
67276	DUS2	false	GCN_NODE
67277	ZKSCAN4	false	GCN_NODE
67278	RAE1	false	GCN_NODE
67279	C16orf95	false	GCN_NODE
67280	PITX2	false	TF
67281	GTSE1	false	GCN_NODE
67282	CHEK1	false	GCN_NODE
67283	HSPA12B	false	GCN_NODE
67284	CDCA4	false	GCN_NODE
67285	EPRS	false	GCN_NODE
67286	DUOXA1	false	GCN_NODE
67287	SLC35B2	false	GCN_NODE
67288	MCTS1	false	GCN_NODE
67289	RFT1	false	GCN_NODE
67290	RP4-758J18.2	false	GCN_NODE
67291	POP4	false	GCN_NODE
67292	G6PC3	false	GCN_NODE
67293	MTIF2	false	GCN_NODE
67294	GPI	false	GCN_NODE
67295	RMND5B	false	GCN_NODE
67296	UNG	false	GCN_NODE
67297	B3GALT6	false	GCN_NODE
67298	COX8A	false	GCN_NODE
67299	STAT3	false	TF
67300	TFEB	false	TF
67301	ZBTB42	false	GCN_NODE
67302	PTK7	false	GCN_NODE
67303	EMC3	false	GCN_NODE
67304	PRIM2	false	GCN_NODE
67305	THAP1	false	TF
67306	ZHX1	false	TF
67307	LRRC48	false	GCN_NODE
67308	C1orf192	false	GCN_NODE
67309	PIH1D2	false	GCN_NODE
67310	LRRC46	false	GCN_NODE
67311	AK8	false	GCN_NODE
67312	DNALI1	false	GCN_NODE
67313	ETV2	false	TF
67314	SIX5	false	TF
67315	APRT	false	GCN_NODE
67316	ABHD11	false	GCN_NODE
67317	FKBP2	false	GCN_NODE
67318	NDUFS7	false	GCN_NODE
67319	RECQL4	false	GCN_NODE
67320	MFSD3	false	GCN_NODE
67321	ATAD3A	false	GCN_NODE
67322	FBXL6	false	GCN_NODE
67323	SRM	false	GCN_NODE
67324	ARNT	false	TF
67325	BHLHE40	false	TF
67326	DCLRE1A	false	GCN_NODE
67327	BPNT1	false	GCN_NODE
67328	VEPH1	false	GCN_NODE
67329	SECISBP2L	false	GCN_NODE
67330	TGS1	false	GCN_NODE
67331	ELK1	false	TF
67332	HES4	false	TF
67333	HES5	false	TF
67334	HES7	false	TF
67335	ZBTB1	false	TF
67336	ELF3	false	TF
67337	TOR3A	false	GCN_NODE
67338	ELF1	false	TF
67339	FXN	false	GCN_NODE
67340	MEF2B	false	TF
67341	MXI1	false	TF
67342	TP73	false	GCN_NODE
67343	WDR66	false	GCN_NODE
67344	ZMYND10	false	GCN_NODE
67345	SPEF1	false	GCN_NODE
67346	LRRC23	false	GCN_NODE
67347	CCNO	false	GCN_NODE
67348	TSPAN1	false	GCN_NODE
67349	ROPN1L	false	GCN_NODE
67350	CDHR3	false	GCN_NODE
67351	MAK	false	GCN_NODE
67352	CETN2	false	GCN_NODE
67353	C22orf15	false	GCN_NODE
67354	CCDC180	false	GCN_NODE
67355	KLHL32	false	GCN_NODE
67356	SPAG8	false	GCN_NODE
67357	C3orf67	false	GCN_NODE
67358	PPIL6	false	GCN_NODE
67359	ARHGAP39	false	GCN_NODE
67360	C4orf47	false	GCN_NODE
67361	FANK1	false	GCN_NODE
67362	FAM166B	false	GCN_NODE
67363	DNAH10	false	GCN_NODE
67364	C9orf117	false	GCN_NODE
67365	GRIN3B	false	GCN_NODE
67366	NPHP1	false	GCN_NODE
67367	WDR54	false	GCN_NODE
67368	PPAP2C	false	GCN_NODE
67369	RHOV	false	GCN_NODE
67370	MDH1B	false	GCN_NODE
67371	WDR96	false	GCN_NODE
67372	FHAD1	false	GCN_NODE
67373	CCDC114	false	GCN_NODE
67374	SIX1	false	GCN_NODE
67375	FAM154B	false	GCN_NODE
67376	CCDC151	false	GCN_NODE
67377	WDR16	false	GCN_NODE
67378	ADGB	false	GCN_NODE
67379	RIBC1	false	GCN_NODE
67380	RAB36	false	GCN_NODE
67381	PPP1R32	false	GCN_NODE
67382	PAX9	false	GCN_NODE
67383	IRF6	false	GCN_NODE
67384	TSNAXIP1	false	GCN_NODE
67385	DENND6B	false	GCN_NODE
67386	DNAAF1	false	GCN_NODE
67387	C17orf72	false	GCN_NODE
67388	TIGD4	false	GCN_NODE
67389	TCTEX1D1	false	GCN_NODE
67390	OTX1	false	GCN_NODE
67391	IFT46	false	GCN_NODE
67392	CCDC74A	false	GCN_NODE
67393	PVRL4	false	GCN_NODE
67394	SRCIN1	false	GCN_NODE
67395	RABL5	false	GCN_NODE
67396	NGEF	false	GCN_NODE
67397	E2F8	false	GCN_NODE
67398	SLC52A1	false	GCN_NODE
67399	CCDC13	false	GCN_NODE
67400	FAM227A	false	GCN_NODE
67401	EPN3	false	GCN_NODE
67402	DZIP1L	false	GCN_NODE
67403	CP	false	GCN_NODE
67404	RFX2	false	TF
67405	C10orf95	false	GCN_NODE
67406	SIX4	false	GCN_NODE
67407	FBXW9	false	GCN_NODE
67408	SPTBN2	false	GCN_NODE
67409	IGSF9	false	GCN_NODE
67410	SPA17	false	GCN_NODE
67411	CCDC24	false	GCN_NODE
67412	RUVBL2	false	GCN_NODE
67413	SLC44A4	false	GCN_NODE
67414	ST6GALNAC1	false	GCN_NODE
67415	TTC30B	false	GCN_NODE
67416	RFX4	false	TF
67417	MIPEP	false	GCN_NODE
67418	ELK3	false	TF
67419	HSF1	false	TF
67420	ARID2	false	TF
67421	RFX3	false	TF
67422	RFX5	false	TF
67423	HEYL	false	TF
67424	SP4	false	TF
67425	TFEC	false	TF
67426	DBP	false	TF
67427	TBX4	false	TF
67428	GBX1	false	TF
67429	NFYC	false	TF
67430	NFYB	false	TF
67431	TFE3	false	TF
67432	E2F5	false	TF
67433	YY1	false	TF
67434	EVX2	false	TF
67435	HSFY2	false	TF
67436	TP63	false	TF
67437	FLI1	false	TF
67438	HEY1	false	TF
67439	GMEB2	false	TF
67440	STAT1	false	TF
67441	TCFL5	false	TF
67442	CENPB	false	TF
67443	E2F1	false	GCN_NODE
67444	TFDP1	false	TF
67445	YBX1	false	TF
67446	ETS1	false	TF
67447	NR3C2	false	TF
67448	MEF2D	false	TF
67449	GCM1	false	TF
67450	RFX1	false	TF
67451	MGA	false	TF
67452	ATF6	false	TF
67453	THRA	false	TF
67454	SCRT1	false	TF
67455	SMAD3	false	TF
67456	TLX2	false	TF
67457	JUN	false	TF
67458	ATOH8	false	TF
67459	FOXK1	false	TF
67460	GMEB1	false	TF
67461	KMT2A	false	TF
67462	TBX20	false	TF
67463	MSX1	false	TF
67464	CAMK2N1	false	GCN_NODE
67465	BARX1	false	TF
67466	BCL6	false	TF
67467	FOXB1	false	TF
67468	LHX1	false	TF
67469	LIN54	false	TF
67470	MSX2	false	TF
67471	POU3F3	false	TF
67472	POU4F2	false	TF
67473	ZFHX3	false	TF
67474	ZNF219	false	TF
67475	CENPA	false	GCN_NODE
67476	GINS1	false	GCN_NODE
67477	CRTAC1	false	GCN_NODE
67478	PARM1	false	GCN_NODE
67479	PRSS16	false	GCN_NODE
67480	AKAP1	false	GCN_NODE
67481	C1orf116	false	GCN_NODE
67482	CDKL2	false	GCN_NODE
67483	PABPC1L	false	GCN_NODE
67484	ABCC10	false	GCN_NODE
67485	ZSWIM5	false	GCN_NODE
67486	KARS	false	GCN_NODE
67487	TMEM9B	false	GCN_NODE
67488	QDPR	false	GCN_NODE
67489	ARCN1	false	GCN_NODE
67490	ARMC9	false	GCN_NODE
67491	ARPC4	false	GCN_NODE
67492	SLC12A9	false	GCN_NODE
67493	MRPL46	false	GCN_NODE
67494	CBS	false	GCN_NODE
67495	PARN	false	GCN_NODE
67496	SMAD6	false	GCN_NODE
67497	DNAJA3	false	GCN_NODE
67498	HIF1AN	false	GCN_NODE
67499	TGFBRAP1	false	GCN_NODE
67500	PSME3	false	GCN_NODE
67501	E2F4	false	GCN_NODE
67502	ZSCAN25	false	GCN_NODE
67503	PSMD2	false	GCN_NODE
67504	KDM4A	false	GCN_NODE
67505	HDDC3	false	GCN_NODE
67506	SMG8	false	GCN_NODE
67507	NOP56	false	GCN_NODE
67508	ZNF341	false	GCN_NODE
67509	ADCK5	false	GCN_NODE
67510	EIF3B	false	GCN_NODE
67511	SIGLEC10	false	GCN_NODE
67512	HN1L	false	GCN_NODE
67513	FBXO27	false	GCN_NODE
67514	EXOSC2	false	GCN_NODE
67515	PIP4K2B	false	GCN_NODE
67516	CA12	false	GCN_NODE
67517	PUS1	false	GCN_NODE
67518	TMEM192	false	GCN_NODE
67519	FZD8	false	GCN_NODE
67520	SLC36A1	false	GCN_NODE
67521	ECH1	false	GCN_NODE
67522	PSMG1	false	GCN_NODE
67523	XKR8	false	GCN_NODE
67524	LCMT2	false	GCN_NODE
67525	GLTPD1	false	GCN_NODE
67526	DFFB	false	GCN_NODE
67527	C3orf33	false	GCN_NODE
67528	FBXW5	false	GCN_NODE
67529	TIMM21	false	GCN_NODE
67530	THOP1	false	GCN_NODE
67531	PUF60	false	GCN_NODE
67532	SHKBP1	false	GCN_NODE
67533	ATP5A1	false	GCN_NODE
67534	ELP3	false	GCN_NODE
67535	LZTR1	false	GCN_NODE
67536	PEX3	false	GCN_NODE
67537	DEPTOR	false	GCN_NODE
67538	ERP29	false	GCN_NODE
67539	PTPLAD1	false	GCN_NODE
67540	HDHD2	false	GCN_NODE
67541	ZNF319	false	GCN_NODE
67542	GTF2H3	false	GCN_NODE
67543	LSM14B	false	GCN_NODE
67544	SAYSD1	false	GCN_NODE
67545	TMEM39B	false	GCN_NODE
67546	ATP6V1D	false	GCN_NODE
67547	ALDH16A1	false	GCN_NODE
67548	SNRNP40	false	GCN_NODE
67549	CCDC43	false	GCN_NODE
67550	ASNA1	false	GCN_NODE
67551	TXLNA	false	GCN_NODE
67552	SHE	false	GCN_NODE
67553	MNDA	false	GCN_NODE
67554	POLR1C	false	GCN_NODE
67555	BCS1L	false	GCN_NODE
67556	LRRC47	false	GCN_NODE
67557	TADA3	false	GCN_NODE
67558	SIRT2	false	GCN_NODE
67559	AASDH	false	GCN_NODE
67560	NEURL4	false	GCN_NODE
67561	TM6SF1	false	GCN_NODE
67562	NPRL3	false	GCN_NODE
67563	CLP1	false	GCN_NODE
67564	SHARPIN	false	GCN_NODE
67565	SEMA4F	false	GCN_NODE
67566	CYB561D1	false	GCN_NODE
67567	KIAA1279	false	GCN_NODE
67568	CHRNB1	false	GCN_NODE
67569	DBR1	false	GCN_NODE
67570	HPS1	false	GCN_NODE
67571	MRPL20	false	GCN_NODE
67572	ACAD9	false	GCN_NODE
67573	SUGP1	false	GCN_NODE
67574	HSDL1	false	GCN_NODE
67575	CHAMP1	false	GCN_NODE
67576	HADH	false	GCN_NODE
67577	PRKAG1	false	GCN_NODE
67578	MRPS9	false	GCN_NODE
67579	UBTF	false	GCN_NODE
67580	REXO4	false	GCN_NODE
67581	NAGK	false	GCN_NODE
67582	PLGRKT	false	GCN_NODE
67583	DBNL	false	GCN_NODE
67584	CCDC97	false	GCN_NODE
67585	RPL7L1	false	GCN_NODE
67586	RDH13	false	GCN_NODE
67587	PRIM1	false	GCN_NODE
67588	ZMAT5	false	GCN_NODE
67589	NKX2-1	false	GCN_NODE
67590	EMC1	false	GCN_NODE
67591	TSN	false	GCN_NODE
67592	SLCO2B1	false	GCN_NODE
67593	KIAA0196	false	GCN_NODE
67594	USP18	false	GCN_NODE
67595	MVP	false	GCN_NODE
67596	RPUSD4	false	GCN_NODE
67597	MOCS3	false	GCN_NODE
67598	FAM217B	false	GCN_NODE
67599	LRRC8E	false	GCN_NODE
67600	PPT1	false	GCN_NODE
67601	BRD8	false	GCN_NODE
67602	SPDYE3	false	GCN_NODE
67603	KBTBD7	false	GCN_NODE
67604	SMPDL3B	false	GCN_NODE
67605	FAM78A	false	GCN_NODE
67606	STRIP1	false	GCN_NODE
67607	TLR4	false	GCN_NODE
67608	PSMD4	false	GCN_NODE
67609	WDR6	false	GCN_NODE
67610	AL591479.1	false	GCN_NODE
67611	SNTB1	false	GCN_NODE
67612	POLR3C	false	GCN_NODE
67613	ZNF212	false	GCN_NODE
67614	DNAJC28	false	GCN_NODE
67615	ACN9	false	GCN_NODE
67616	HENMT1	false	GCN_NODE
67617	SPSB2	false	GCN_NODE
67618	CHAC2	false	GCN_NODE
67619	RHBDD3	false	GCN_NODE
67620	ARHGAP35	false	GCN_NODE
67621	MSRB1	false	GCN_NODE
67622	MRPS18A	false	GCN_NODE
67623	TRIAP1	false	GCN_NODE
67624	DBT	false	GCN_NODE
67625	NIP7	false	GCN_NODE
67626	ZNF786	false	GCN_NODE
67627	HPS6	false	GCN_NODE
67628	MTERFD1	false	GCN_NODE
67629	TRMT10C	false	GCN_NODE
67630	VAC14	false	GCN_NODE
67631	MARS2	false	GCN_NODE
67632	GSR	false	GCN_NODE
67633	PAK1IP1	false	GCN_NODE
67634	GDPGP1	false	GCN_NODE
67635	CR1	false	GCN_NODE
67636	ZSWIM3	false	GCN_NODE
67637	RPUSD2	false	GCN_NODE
67638	ZBTB8OS	false	GCN_NODE
67639	ZBTB45	false	GCN_NODE
67640	DNTTIP1	false	GCN_NODE
67641	NDUFB3	false	GCN_NODE
67642	PATZ1	false	GCN_NODE
67643	ZNF622	false	GCN_NODE
67644	RTN4IP1	false	GCN_NODE
67645	MESP1	false	GCN_NODE
67646	MFNG	false	GCN_NODE
67647	TYK2	false	GCN_NODE
67648	MRTO4	false	GCN_NODE
67649	RPS19BP1	false	GCN_NODE
67650	ZNF517	false	GCN_NODE
67651	RPP38	false	GCN_NODE
67652	RNMTL1	false	GCN_NODE
67653	PAXIP1	false	GCN_NODE
67654	TRMT61B	false	GCN_NODE
67655	TRMT12	false	GCN_NODE
67656	PIGW	false	GCN_NODE
67657	POP1	false	GCN_NODE
67658	C18orf21	false	GCN_NODE
67659	KBTBD6	false	GCN_NODE
67660	NDUFS3	false	GCN_NODE
67661	ZSCAN20	false	GCN_NODE
67662	H2AFY	false	GCN_NODE
67663	DSCC1	false	GCN_NODE
67664	ASCC2	false	GCN_NODE
67665	ZNF576	false	GCN_NODE
67666	NUFIP1	false	GCN_NODE
67667	PPL	false	GCN_NODE
67668	TALDO1	false	GCN_NODE
67669	FBXL18	false	GCN_NODE
67670	MRPL40	false	GCN_NODE
67671	TEFM	false	GCN_NODE
67672	SRCRB4D	false	GCN_NODE
67673	GPN1	false	GCN_NODE
67674	ZNF646	false	GCN_NODE
67675	PPP1R8	false	GCN_NODE
67676	SRRD	false	GCN_NODE
67677	RPIA	false	GCN_NODE
67678	RFC5	false	GCN_NODE
67679	LSM1	false	GCN_NODE
67680	C1GALT1C1	false	GCN_NODE
67681	C6orf203	false	GCN_NODE
67682	AP5Z1	false	GCN_NODE
67683	PSKH1	false	GCN_NODE
67684	MRPS7	false	GCN_NODE
67685	ARRB1	false	GCN_NODE
67686	GTF2E1	false	GCN_NODE
67687	SEC61A1	false	GCN_NODE
67688	TXNDC9	false	GCN_NODE
67689	CRELD2	false	GCN_NODE
67690	COA4	false	GCN_NODE
67691	SRPRB	false	GCN_NODE
67692	COMMD5	false	GCN_NODE
67693	DPH2	false	GCN_NODE
67694	PCYT2	false	GCN_NODE
67695	RBFA	false	GCN_NODE
67696	C2orf47	false	GCN_NODE
67697	RBBP5	false	GCN_NODE
67698	ICMT	false	GCN_NODE
67699	DHTKD1	false	GCN_NODE
67700	ADI1	false	GCN_NODE
67701	EAF2	false	GCN_NODE
67702	FBXO45	false	GCN_NODE
67703	C10orf35	false	GCN_NODE
67704	ZNF2	false	GCN_NODE
67705	TMEM245	false	GCN_NODE
67706	C9orf64	false	GCN_NODE
67707	ORC5	false	GCN_NODE
67708	ALKBH4	false	GCN_NODE
67709	RNF26	false	GCN_NODE
67710	SLC25A17	false	GCN_NODE
67711	SLC4A1AP	false	GCN_NODE
67712	DCTD	false	GCN_NODE
67713	TIMM50	false	GCN_NODE
67714	ADH5	false	GCN_NODE
67715	NUP35	false	GCN_NODE
67716	TMEM182	false	GCN_NODE
67717	IPP	false	GCN_NODE
67718	ASB6	false	GCN_NODE
67719	SH3BP5L	false	GCN_NODE
67720	COQ3	false	GCN_NODE
67721	WDR3	false	GCN_NODE
67722	SUV39H1	false	GCN_NODE
67723	ABCF2	false	GCN_NODE
67724	ZBED6CL	false	GCN_NODE
67725	SEC24C	false	GCN_NODE
67726	SF3B4	false	GCN_NODE
67727	MED19	false	GCN_NODE
67728	GOPC	false	GCN_NODE
67729	WIBG	false	GCN_NODE
67730	L3MBTL2	false	GCN_NODE
67731	NAIF1	false	GCN_NODE
67732	PSMD9	false	GCN_NODE
67733	ASB8	false	GCN_NODE
67734	TTC1	false	GCN_NODE
67735	VTA1	false	GCN_NODE
67736	LRRC61	false	GCN_NODE
67737	DNASE1	false	GCN_NODE
67738	DNASE1L1	false	GCN_NODE
67739	MCAT	false	GCN_NODE
67740	URB2	false	GCN_NODE
67741	CD14	false	GCN_NODE
67742	ZNF385B	false	GCN_NODE
67743	TRAM1	false	GCN_NODE
67744	DSCR3	false	GCN_NODE
67745	CDC25C	false	GCN_NODE
67746	NOC2L	false	GCN_NODE
67747	ARSE	false	GCN_NODE
67748	NCMAP	false	GCN_NODE
67749	TENC1	false	GCN_NODE
67750	XRCC2	false	GCN_NODE
67751	IRF2BP1	false	GCN_NODE
67752	MRPL54	false	GCN_NODE
67753	C6orf223	false	GCN_NODE
67754	YARS2	false	GCN_NODE
67755	C15orf52	false	GCN_NODE
67756	ATP6V1C1	false	GCN_NODE
67757	C12orf4	false	GCN_NODE
67758	NDUFB2	false	GCN_NODE
67759	DSC2	false	GCN_NODE
67760	PANK1	false	GCN_NODE
67761	VWA9	false	GCN_NODE
67762	FDPS	false	GCN_NODE
67763	ABT1	false	GCN_NODE
67764	PALMD	false	GCN_NODE
67765	NUBP2	false	GCN_NODE
67766	ZXDC	false	GCN_NODE
67767	RTCA	false	GCN_NODE
67768	UBE2D4	false	GCN_NODE
67769	ELAC1	false	GCN_NODE
67770	ASPSCR1	false	GCN_NODE
67771	SMIM1	false	GCN_NODE
67772	CACNB1	false	GCN_NODE
67773	CHCHD4	false	GCN_NODE
67774	PRR15L	false	GCN_NODE
67775	MRPS22	false	GCN_NODE
67776	GLS2	false	GCN_NODE
67777	UBLCP1	false	GCN_NODE
67778	VPS4B	false	GCN_NODE
67779	GSKIP	false	GCN_NODE
67780	EMC7	false	GCN_NODE
67781	SIAE	false	GCN_NODE
67782	ZNF135	false	GCN_NODE
67783	MFSD1	false	GCN_NODE
67784	LYPLAL1	false	GCN_NODE
67785	USP40	false	GCN_NODE
67786	MOB3A	false	GCN_NODE
67787	C14orf119	false	GCN_NODE
67788	HS1BP3	false	GCN_NODE
67789	COL5A1	false	GCN_NODE
67790	DNAJB12	false	GCN_NODE
67791	C10orf128	false	GCN_NODE
67792	RAB10	false	GCN_NODE
67793	POP7	false	GCN_NODE
67794	RMDN2	false	GCN_NODE
67795	DHFR	false	GCN_NODE
67796	ITPK1	false	GCN_NODE
67797	PNPO	false	GCN_NODE
67798	NDUFV3	false	GCN_NODE
67799	COG8	false	GCN_NODE
67800	BLVRB	false	GCN_NODE
67801	PMVK	false	GCN_NODE
67802	CSTF1	false	GCN_NODE
67803	PDZD11	false	GCN_NODE
67804	KCTD5	false	GCN_NODE
67805	SLC9A3R2	false	GCN_NODE
67806	TMEM186	false	GCN_NODE
67807	GLE1	false	GCN_NODE
67808	CDK2AP2	false	GCN_NODE
67809	DSN1	false	GCN_NODE
67810	LGALSL	false	GCN_NODE
67811	PWWP2A	false	GCN_NODE
67812	PCGF1	false	GCN_NODE
67813	CDK4	false	GCN_NODE
67814	ST6GALNAC4	false	GCN_NODE
67815	PSMB7	false	GCN_NODE
67816	DHCR24	false	GCN_NODE
67817	TOX	false	GCN_NODE
67818	ENTPD3	false	GCN_NODE
67819	SEZ6L2	false	GCN_NODE
67820	SPTSSA	false	GCN_NODE
67821	MRPL47	false	GCN_NODE
67822	LPCAT1	false	GCN_NODE
67823	RPN1	false	GCN_NODE
67824	SYNE4	false	GCN_NODE
67825	RTKN	false	GCN_NODE
67826	ARV1	false	GCN_NODE
67827	YDJC	false	GCN_NODE
67828	PIH1D1	false	GCN_NODE
67829	SIGLEC7	false	GCN_NODE
67830	RP11-664D7.4	false	GCN_NODE
67831	ARHGEF15	false	GCN_NODE
67832	TRMT5	false	GCN_NODE
67833	ATP11A	false	GCN_NODE
67834	IARS2	false	GCN_NODE
67835	ARAP1	false	GCN_NODE
67836	PIGM	false	GCN_NODE
67837	NINJ2	false	GCN_NODE
67838	GGT1	false	GCN_NODE
67839	SNRPB2	false	GCN_NODE
67840	PQLC2	false	GCN_NODE
67841	SNX1	false	GCN_NODE
67842	ZNF408	false	GCN_NODE
67843	SLC27A3	false	GCN_NODE
67844	LEPREL4	false	GCN_NODE
67845	FOXA1	false	GCN_NODE
67846	VWA1	false	GCN_NODE
67847	DOK4	false	GCN_NODE
67848	ACVRL1	false	GCN_NODE
67849	SOX9	false	GCN_NODE
67850	TMEM258	false	GCN_NODE
67851	HPCAL1	false	GCN_NODE
67852	ID3	false	GCN_NODE
67853	KCNQ1	false	GCN_NODE
67854	C19orf54	false	GCN_NODE
67855	GOLT1A	false	GCN_NODE
67856	SGPP2	false	GCN_NODE
67857	PRODH	false	GCN_NODE
67858	BEND3	false	GCN_NODE
67859	C12orf49	false	GCN_NODE
67860	CCDC101	false	GCN_NODE
67861	EBNA1BP2	false	GCN_NODE
67862	CXCL17	false	GCN_NODE
67863	LDHD	false	GCN_NODE
67864	ZC2HC1C	false	GCN_NODE
67865	TMEM97	false	GCN_NODE
67866	ZDHHC3	false	GCN_NODE
67867	SLC7A8	false	GCN_NODE
67868	LRP2BP	false	GCN_NODE
67869	FASTKD5	false	GCN_NODE
67870	POU2F3	false	GCN_NODE
67871	TXNDC5	false	GCN_NODE
67872	RAD1	false	GCN_NODE
67873	NDUFAB1	false	GCN_NODE
67874	CDK7	false	GCN_NODE
67875	CYBA	false	GCN_NODE
67876	PPIL1	false	GCN_NODE
67877	ACAD8	false	GCN_NODE
67878	IFT57	false	GCN_NODE
67879	PIP4K2C	false	GCN_NODE
67880	GYG2	false	GCN_NODE
67881	BCCIP	false	GCN_NODE
67882	TMCO4	false	GCN_NODE
67883	TMEM254	false	GCN_NODE
67884	KNOP1	false	GCN_NODE
67885	PLA2G10	false	GCN_NODE
67886	ATIC	false	GCN_NODE
67887	C11orf70	false	GCN_NODE
67888	PSMB5	false	GCN_NODE
67889	MTX1	false	GCN_NODE
67890	NCBP2	false	GCN_NODE
67891	MCM3	false	GCN_NODE
67892	FKBPL	false	GCN_NODE
67893	PDSS2	false	GCN_NODE
67894	FAM175B	false	GCN_NODE
67895	TOMM22	false	GCN_NODE
67896	ATP6V0D1	false	GCN_NODE
67897	CCS	false	GCN_NODE
67898	PHPT1	false	GCN_NODE
67899	LRRC14	false	GCN_NODE
67900	OST4	false	GCN_NODE
67901	C1orf123	false	GCN_NODE
67902	CTDSP1	false	GCN_NODE
67903	LSM4	false	GCN_NODE
67904	MRPS18B	false	GCN_NODE
67905	EIF4EBP1	false	GCN_NODE
67906	SDSL	false	GCN_NODE
67907	UBE2L3	false	GCN_NODE
67908	RABL2B	false	GCN_NODE
67909	ANKRD54	false	GCN_NODE
67910	XYLT2	false	GCN_NODE
67911	LYPLA2	false	GCN_NODE
67912	C3orf18	false	GCN_NODE
67913	IKBKE	false	GCN_NODE
67914	CORO1B	false	GCN_NODE
67915	SIGMAR1	false	GCN_NODE
67916	CARD9	false	GCN_NODE
67917	TSNARE1	false	GCN_NODE
67918	MPST	false	GCN_NODE
67919	ZNF575	false	GCN_NODE
67920	PSMB10	false	GCN_NODE
67921	GLI4	false	GCN_NODE
67922	TYMP	false	GCN_NODE
67923	CBX8	false	GCN_NODE
67924	ZMYND8	false	GCN_NODE
67925	EIF2B3	false	GCN_NODE
67926	SPATA18	false	GCN_NODE
67927	EFCAB12	false	GCN_NODE
67928	C9orf24	false	GCN_NODE
67929	C8orf47	false	GCN_NODE
67930	KIF24	false	GCN_NODE
67931	MOK	false	GCN_NODE
67932	DRC1	false	GCN_NODE
67933	ESPN	false	GCN_NODE
67934	CCDC65	false	GCN_NODE
67935	NEK5	false	GCN_NODE
67936	CD164L2	false	GCN_NODE
67937	RSPH9	false	GCN_NODE
67938	C9orf116	false	GCN_NODE
67939	TMEM231	false	GCN_NODE
67940	CCDC170	false	GCN_NODE
67941	C16orf93	false	GCN_NODE
67942	ARX	false	GCN_NODE
67943	EFCAB10	false	GCN_NODE
67944	MAT1A	false	GCN_NODE
67945	TTC23L	false	GCN_NODE
67946	CCDC153	false	GCN_NODE
67947	C9orf9	false	GCN_NODE
67948	ZNF273	false	GCN_NODE
67949	ENKUR	false	GCN_NODE
67950	ZNF474	false	GCN_NODE
67951	PRR15	false	GCN_NODE
67952	TTC18	false	GCN_NODE
67953	RPGRIP1L	false	GCN_NODE
67954	CCDC113	false	GCN_NODE
67955	C20orf26	false	GCN_NODE
67956	CDH26	false	GCN_NODE
67957	PACRG	false	GCN_NODE
67958	ZDHHC13	false	GCN_NODE
67959	IQUB	false	GCN_NODE
67960	C16orf71	false	GCN_NODE
67961	DTHD1	false	GCN_NODE
67962	KIF9	false	GCN_NODE
67963	ACSBG1	false	GCN_NODE
67964	ZMYND12	false	GCN_NODE
67965	AK7	false	GCN_NODE
67966	OSCP1	false	GCN_NODE
67967	UBXN10	false	GCN_NODE
67968	EFCAB11	false	GCN_NODE
67969	SLC27A2	false	GCN_NODE
67970	CCDC74B	false	GCN_NODE
67971	IQCC	false	GCN_NODE
67972	TMEM232	false	GCN_NODE
67973	RTDR1	false	GCN_NODE
67974	NEK10	false	GCN_NODE
67975	CDS1	false	GCN_NODE
67976	VSTM2L	false	GCN_NODE
67977	DYNC2H1	false	GCN_NODE
67978	GLB1L2	false	GCN_NODE
67979	CCDC176	false	GCN_NODE
67980	SYT8	false	GCN_NODE
67981	HSPB11	false	GCN_NODE
67982	CYP2J2	false	GCN_NODE
67983	SORD	false	GCN_NODE
67984	HEATR2	false	GCN_NODE
67985	TJP3	false	GCN_NODE
67986	LPAR3	false	GCN_NODE
67987	KIAA0408	false	GCN_NODE
67988	SLIT2	false	GCN_NODE
