# Supplementary material
Source: publisher figshare collection journal article supplement (https://springernature.figshare.com/ndownloader/files/35041376)
Supplement: Supplementary file 1 [file 35041376 › CytoscapeSession-2021_06_28-02_05/tables/82099-lung_GRN4TCGA_LUAD.txt_2/SHARED_ATTRS-org.cytoscape.model.CyEdge-82099+shared+edge.cytable]

CyCSV-Version	1
SUID	Ratio_sig	shared interaction	shared name
java.lang.Long	java.lang.Double	java.lang.String	java.lang.String
	mutable
82099 shared edge
82197	0.0	GRN	ARID2 (GRN) TNS4
82196	1.0	GRN	ARID2 (GRN) SMKR1
82194	1.0	GRN	ELK4 (GRN) DUOX1
82193	1.0	GRN	ELK4 (GRN) C16orf59
82192	1.0	GRN	ELK4 (GRN) ZWINT
82191	0.0	GRN	ELK4 (GRN) SYNE4
82188	1.0	GRN	ETV1 (GRN) LIMS2
82187	1.0	GRN	ETV1 (GRN) ILVBL
82184	1.0	GRN	ETV4 (GRN) LIMS2
82183	1.0	GRN	ETV4 (GRN) ABCC5
82182	1.0	GRN	ETV4 (GRN) ILVBL
82181	0.0	GRN	ETV6 (GRN) LIMS2
82180	0.0	GRN	ETV6 (GRN) H2AFY2
82179	0.0	GRN	ETV6 (GRN) ILVBL
82178	0.0	GRN	ETV6 (GRN) ACVRL1
82176	1.0	GRN	GABPA (GRN) LIMS2
82175	1.0	GRN	GABPA (GRN) C16orf59
82174	1.0	GRN	GABPA (GRN) ILVBL
82173	1.0	GRN	GABPA (GRN) SYNE4
82172	0.0	GRN	MXI1 (GRN) TNS4
82171	1.0	GRN	MXI1 (GRN) SMKR1
82170	1.0	GRN	NR2F6 (GRN) KIF20A
82169	0.0	GRN	NR2F6 (GRN) ZNF572
82167	0.0	GRN	RFX2 (GRN) TNS4
82166	1.0	GRN	RFX2 (GRN) SMKR1
82165	0.0	GRN	RFX3 (GRN) TNS4
82164	1.0	GRN	RFX3 (GRN) SMKR1
82163	0.0	GRN	RFX4 (GRN) TNS4
82162	1.0	GRN	RFX4 (GRN) SMKR1
82161	0.0	GRN	USF1 (GRN) DUOX1
82160	1.0	GRN	USF1 (GRN) ZWINT
82189	-1.0	GCN	C16orf59 (GCN) SYNE4
82190	-1.0	GCN	DUOX1 (GCN) ZWINT
82177	-1.0	GCN	H2AFY2 (GCN) ACVRL1
82168	-1.0	GCN	KIF20A (GCN) ZNF572
82186	-1.0	GCN	LIMS2 (GCN) ILVBL
82185	-1.0	GCN	LIMS2 (GCN) ABCC5
82195	-1.0	GCN	TNS4 (GCN) SMKR1
