# Supplementary material
Source: publisher figshare collection journal article supplement (https://springernature.figshare.com/ndownloader/files/35041376)
Supplement: Supplementary file 1 [file 35041376 › CytoscapeSession-2021_06_28-02_05/tables/82099-lung_GRN4TCGA_LUAD.txt_2/SHARED_ATTRS-org.cytoscape.model.CyNode-82099+shared+node.cytable]

CyCSV-Version	1
SUID	shared name
java.lang.Long	java.lang.String
82099 shared node
82159	ARID2
82158	TNS4
82157	SMKR1
82156	ELK4
82155	DUOX1
82154	C16orf59
82153	ZWINT
82152	SYNE4
82151	ETV1
82150	LIMS2
82149	ILVBL
82148	ETV4
82147	ABCC5
82146	ETV6
82145	H2AFY2
82144	ACVRL1
82143	GABPA
82142	MXI1
82141	NR2F6
82140	KIF20A
82139	ZNF572
82138	RFX2
82137	RFX3
82136	RFX4
82135	USF1
