# Supplementary material
Source: publisher figshare collection journal article supplement (https://springernature.figshare.com/ndownloader/files/35041376)
Supplement: Supplementary file 1 [file 35041376 › CytoscapeSession-2021_06_28-02_05/tables/82115-82115/HIDDEN-org.cytoscape.model.CyNetwork-82115+hidden+network.cytable]

"CyCSV-Version","1"
"SUID"
"java.lang.Long"
""
"82115 hidden network",""
"82115"
