# Supplementary material
Source: publisher figshare collection journal article supplement (https://springernature.figshare.com/ndownloader/files/35041376)
Supplement: Supplementary file 1 [file 35041376 › CytoscapeSession-2021_06_28-02_05/tables/82125-lung_GRN4TCGA_LUAD.txt_2/LOCAL_ATTRS-org.cytoscape.model.CyEdge-lung_GRN4TCGA_LUAD.txt_2+default+edge.cytable]

CyCSV-Version	1
SUID	interaction	name	selected
java.lang.Long	java.lang.String	java.lang.String	java.lang.Boolean
lung_GRN4TCGA_LUAD.txt_2 default edge
82160	GRN	USF1 (GRN) ZWINT	false
82161	GRN	USF1 (GRN) DUOX1	false
82162	GRN	RFX4 (GRN) SMKR1	false
82163	GRN	RFX4 (GRN) TNS4	false
82164	GRN	RFX3 (GRN) SMKR1	false
82165	GRN	RFX3 (GRN) TNS4	false
82166	GRN	RFX2 (GRN) SMKR1	false
82167	GRN	RFX2 (GRN) TNS4	false
82168	GCN	KIF20A (GCN) ZNF572	false
82169	GRN	NR2F6 (GRN) ZNF572	false
82170	GRN	NR2F6 (GRN) KIF20A	false
82171	GRN	MXI1 (GRN) SMKR1	false
82172	GRN	MXI1 (GRN) TNS4	false
82173	GRN	GABPA (GRN) SYNE4	false
82174	GRN	GABPA (GRN) ILVBL	false
82175	GRN	GABPA (GRN) C16orf59	false
82176	GRN	GABPA (GRN) LIMS2	false
82177	GCN	H2AFY2 (GCN) ACVRL1	false
82178	GRN	ETV6 (GRN) ACVRL1	false
82179	GRN	ETV6 (GRN) ILVBL	false
82180	GRN	ETV6 (GRN) H2AFY2	false
82181	GRN	ETV6 (GRN) LIMS2	false
82182	GRN	ETV4 (GRN) ILVBL	false
82183	GRN	ETV4 (GRN) ABCC5	false
82184	GRN	ETV4 (GRN) LIMS2	false
82185	GCN	LIMS2 (GCN) ABCC5	false
82186	GCN	LIMS2 (GCN) ILVBL	false
82187	GRN	ETV1 (GRN) ILVBL	false
82188	GRN	ETV1 (GRN) LIMS2	false
82189	GCN	C16orf59 (GCN) SYNE4	false
82190	GCN	DUOX1 (GCN) ZWINT	false
82191	GRN	ELK4 (GRN) SYNE4	false
82192	GRN	ELK4 (GRN) ZWINT	false
82193	GRN	ELK4 (GRN) C16orf59	false
82194	GRN	ELK4 (GRN) DUOX1	false
82195	GCN	TNS4 (GCN) SMKR1	false
82196	GRN	ARID2 (GRN) SMKR1	false
82197	GRN	ARID2 (GRN) TNS4	false
