# Supplementary material
Source: publisher figshare collection journal article supplement (https://springernature.figshare.com/ndownloader/files/35041376)
Supplement: Supplementary file 1 [file 35041376 › CytoscapeSession-2021_06_28-02_05/tables/82125-lung_GRN4TCGA_LUAD.txt_2/LOCAL_ATTRS-org.cytoscape.model.CyNode-lung_GRN4TCGA_LUAD.txt_2+default+node.cytable]

CyCSV-Version	1
SUID	Column 6	Column 7	Column 8	DEG	name	selected	Type	UP/DOWN in LUAD
java.lang.Long	java.lang.String	java.lang.String	java.lang.String	java.lang.Integer	java.lang.String	java.lang.Boolean	java.lang.String	java.lang.Integer
	mutable	mutable	mutable	mutable			mutable	mutable
lung_GRN4TCGA_LUAD.txt_2 default node
82135				1	USF1	false	TF	-1
82136				0	RFX4	false	TF	0
82137				1	RFX3	false	TF	-1
82138				1	RFX2	false	TF	-1
82139				1	ZNF572	false	GCN_NODE	1
82140				1	KIF20A	false	GCN_NODE	1
82141				1	NR2F6	false	TF	1
82142				1	MXI1	false	TF	-1
82143				0	GABPA	false	TF	0
82144				1	ACVRL1	false	GCN_NODE	-1
82145				1	H2AFY2	false	GCN_NODE	1
82146				1	ETV6	false	TF	-1
82147				1	ABCC5	false	GCN_NODE	-1
82148				1	ETV4	false	TF	1
82149				1	ILVBL	false	GCN_NODE	1
82150				1	LIMS2	false	GCN_NODE	-1
82151				1	ETV1	false	TF	-1
82152				1	SYNE4	false	GCN_NODE	1
82153				1	ZWINT	false	GCN_NODE	1
82154				1	C16orf59	false	GCN_NODE	1
82155				1	DUOX1	false	GCN_NODE	-1
82156				1	ELK4	false	TF	-1
82157				1	SMKR1	false	GCN_NODE	1
82158				1	TNS4	false	GCN_NODE	1
82159				1	ARID2	false	TF	-1
