# Supplementary material
Source: publisher figshare collection journal article supplement (https://springernature.figshare.com/ndownloader/files/35041376)
Supplement: Supplementary file 1 [file 35041376 › CytoscapeSession-2021_06_28-02_05/tables/82198-lung_GRN4TCGA_LUSC.txt_2/LOCAL_ATTRS-org.cytoscape.model.CyEdge-82198+default+edge.cytable]

"CyCSV-Version","1"
"SUID","interaction","name","selected"
"java.lang.Long","java.lang.String","java.lang.String","java.lang.Boolean"
"","","",""
"82198 default edge",""
