# Supplementary material
Source: publisher figshare collection journal article supplement (https://springernature.figshare.com/ndownloader/files/35041376)
Supplement: Supplementary file 1 [file 35041376 › CytoscapeSession-2021_06_28-02_05/tables/82198-lung_GRN4TCGA_LUSC.txt_2/SHARED_ATTRS-org.cytoscape.model.CyEdge-82198+shared+edge.cytable]

CyCSV-Version	1
SUID	ratio_sig	shared interaction	shared name
java.lang.Long	java.lang.Double	java.lang.String	java.lang.String
	mutable
82198 shared edge
83273	1.0	GRN	MXI1 (GRN) CYP4F11
83272	1.0	GRN	MXI1 (GRN) AKR1B10
83271	0.0	GRN	MXI1 (GRN) GPX2
83270	1.0	GRN	MXI1 (GRN) C1orf192
83269	1.0	GRN	MXI1 (GRN) SOX2
83268	0.0	GRN	MXI1 (GRN) GSTA1
83267	1.0	GRN	MXI1 (GRN) STK33
83266	1.0	GRN	MXI1 (GRN) TP63
83252	1.0	GRN	NRF1 (GRN) LRRC25
83251	1.0	GRN	NRF1 (GRN) TOR4A
83250	1.0	GRN	NRF1 (GRN) ALDH3B1
83249	1.0	GRN	NRF1 (GRN) CCR1
83248	1.0	GRN	NRF1 (GRN) VWF
83247	1.0	GRN	NRF1 (GRN) ITGB2
83246	1.0	GRN	NRF1 (GRN) CDC45
83245	1.0	GRN	NRF1 (GRN) CD97
83244	1.0	GRN	NRF1 (GRN) CAPN8
83243	1.0	GRN	NRF1 (GRN) TGFBR2
83242	1.0	GRN	NRF1 (GRN) SFTA3
83241	1.0	GRN	NRF1 (GRN) SHE
83240	1.0	GRN	NRF1 (GRN) MYO1F
83239	1.0	GRN	NRF1 (GRN) SMARCB1
83238	1.0	GRN	NRF1 (GRN) TRIP13
83237	1.0	GRN	NRF1 (GRN) PSMC5
83236	1.0	GRN	NRF1 (GRN) UNC13D
83235	1.0	GRN	NRF1 (GRN) AUNIP
83234	1.0	GRN	NRF1 (GRN) POLDIP2
83233	1.0	GRN	NRF1 (GRN) ARHGAP30
83232	1.0	GRN	NRF1 (GRN) MCM5
83231	1.0	GRN	NRF1 (GRN) CORO1A
83161	1.0	GRN	ETV4 (GRN) LIMS2
83160	1.0	GRN	ETV4 (GRN) TRIP13
83159	1.0	GRN	ETV4 (GRN) INMT
83158	1.0	GRN	ETV4 (GRN) LPCAT1
83150	1.0	GRN	ELF1 (GRN) LPCAT1
83149	0.0	GRN	ELF1 (GRN) ZNF320
83142	1.0	GRN	SMARCC2 (GRN) TOR4A
83141	1.0	GRN	SMARCC2 (GRN) CENPO
83140	1.0	GRN	SMARCC2 (GRN) ARHGAP30
83139	1.0	GRN	SMARCC2 (GRN) DNAJC19
83127	1.0	GRN	BRCA1 (GRN) LIMS2
83126	1.0	GRN	BRCA1 (GRN) NLRP9
83125	1.0	GRN	BRCA1 (GRN) SLC22A31
83124	1.0	GRN	BRCA1 (GRN) RHOBTB2
83123	1.0	GRN	BRCA1 (GRN) LPCAT1
83114	0.0	GRN	ELF4 (GRN) NLRP9
83113	1.0	GRN	ELF4 (GRN) SLC22A31
83112	1.0	GRN	ELF4 (GRN) TRIP13
83111	0.0	GRN	ELF4 (GRN) MC4R
83110	0.0	GRN	ELF4 (GRN) WNT5A
83109	0.0	GRN	ELF4 (GRN) ZNF320
83108	1.0	GRN	ELF4 (GRN) LPCAT1
83107	1.0	GRN	ELF4 (GRN) TRIM16L
83106	1.0	GRN	ELF4 (GRN) KNSTRN
83091	1.0	GRN	ETV3 (GRN) TRIP13
83090	0.0	GRN	ETV3 (GRN) CAPN8
83089	1.0	GRN	ETV3 (GRN) SFTA2
83088	1.0	GRN	ETV3 (GRN) INMT
83087	0.0	GRN	ETV3 (GRN) ZNF320
83086	1.0	GRN	ETV3 (GRN) LPCAT1
83085	1.0	GRN	ETV3 (GRN) NKX2-1
83084	1.0	GRN	ETV3 (GRN) ARHGAP30
83083	1.0	GRN	ETV3 (GRN) SHE
83072	0.0	GRN	ETV6 (GRN) SFTPD
83071	1.0	GRN	ETV6 (GRN) LIMS2
83070	1.0	GRN	ETV6 (GRN) TOR4A
83069	0.0	GRN	ETV6 (GRN) NLRP9
83068	1.0	GRN	ETV6 (GRN) ST3GAL5
83067	0.0	GRN	ETV6 (GRN) DTD2
83066	0.0	GRN	ETV6 (GRN) MC4R
83065	1.0	GRN	ETV6 (GRN) SFTA3
83064	0.0	GRN	ETV6 (GRN) ZNF320
83063	1.0	GRN	ETV6 (GRN) LPCAT1
83062	1.0	GRN	ETV6 (GRN) SLC39A8
83061	1.0	GRN	ETV6 (GRN) H2AFY2
83060	1.0	GRN	ETV6 (GRN) ARHGAP30
83059	1.0	GRN	ETV6 (GRN) SHE
83037	1.0	GRN	GABPA (GRN) LIMS2
83036	0.0	GRN	GABPA (GRN) TOR4A
83035	1.0	GRN	GABPA (GRN) OIP5
83034	1.0	GRN	GABPA (GRN) TIMELESS
83033	0.0	GRN	GABPA (GRN) ZNF320
83032	1.0	GRN	GABPA (GRN) ADAL
83031	1.0	GRN	GABPA (GRN) VWF
83030	1.0	GRN	GABPA (GRN) NLRP9
83029	1.0	GRN	GABPA (GRN) FOXM1
83028	1.0	GRN	GABPA (GRN) RFC5
83027	1.0	GRN	GABPA (GRN) CENPO
83026	1.0	GRN	GABPA (GRN) SLC22A31
83025	1.0	GRN	GABPA (GRN) KNSTRN
83024	1.0	GRN	GABPA (GRN) TROAP
83023	0.0	GRN	GABPA (GRN) TMEM45B
83022	0.0	GRN	GABPA (GRN) MVP
83021	1.0	GRN	GABPA (GRN) CDCA5
83020	0.0	GRN	GABPA (GRN) MC4R
83019	1.0	GRN	GABPA (GRN) SFTA2
83018	0.0	GRN	GABPA (GRN) PIK3R6
83017	1.0	GRN	GABPA (GRN) SPC25
83016	1.0	GRN	GABPA (GRN) COX5A
83015	1.0	GRN	GABPA (GRN) SFTA3
83014	1.0	GRN	GABPA (GRN) WNT5A
83013	1.0	GRN	GABPA (GRN) INMT
83012	1.0	GRN	GABPA (GRN) SHE
83011	1.0	GRN	GABPA (GRN) TGFBR2
83010	1.0	GRN	GABPA (GRN) RNASEH2A
83009	1.0	GRN	GABPA (GRN) YEATS4
83008	1.0	GRN	GABPA (GRN) LPCAT1
83007	1.0	GRN	GABPA (GRN) TRIM16L
83006	1.0	GRN	GABPA (GRN) RAD51
83005	1.0	GRN	GABPA (GRN) C15orf40
83004	1.0	GRN	GABPA (GRN) SLC39A8
83003	1.0	GRN	GABPA (GRN) ST3GAL5
83002	1.0	GRN	GABPA (GRN) AUNIP
83001	1.0	GRN	GABPA (GRN) SKP2
83000	1.0	GRN	GABPA (GRN) ARHGAP30
82999	1.0	GRN	GABPA (GRN) TRAIP
82919	0.0	GRN	NR2F6 (GRN) ADAL
82918	1.0	GRN	NR2F6 (GRN) OIP5
82917	1.0	GRN	NR2F6 (GRN) CENPO
82916	1.0	GRN	NR2F6 (GRN) PSMA4
82915	1.0	GRN	NR2F6 (GRN) COX5A
82914	0.0	GRN	NR2F6 (GRN) C15orf40
82906	1.0	GRN	SIX5 (GRN) TOR4A
82902	1.0	GRN	TOPORS (GRN) ADAL
82901	1.0	GRN	TOPORS (GRN) OIP5
82900	1.0	GRN	TOPORS (GRN) CENPO
82899	1.0	GRN	TOPORS (GRN) INMT
82898	1.0	GRN	TOPORS (GRN) C15orf40
82897	1.0	GRN	TOPORS (GRN) TOR4A
82888	1.0	GRN	PITX2 (GRN) LIMS2
82887	1.0	GRN	PITX2 (GRN) TOR4A
82886	1.0	GRN	PITX2 (GRN) ADAL
82885	0.0	GRN	PITX2 (GRN) OIP5
82884	1.0	GRN	PITX2 (GRN) KNSTRN
82883	1.0	GRN	PITX2 (GRN) PSMA4
82882	1.0	GRN	PITX2 (GRN) C2orf44
82881	1.0	GRN	PITX2 (GRN) NABP2
82880	0.0	GRN	PITX2 (GRN) RAD51
82879	1.0	GRN	PITX2 (GRN) C15orf40
82864	0.0	GRN	ARNTL (GRN) NLRP9
82863	1.0	GRN	ARNTL (GRN) SLC22A31
82862	1.0	GRN	ARNTL (GRN) DTD2
82858	1.0	GRN	DDIT3 (GRN) NLRP9
82856	1.0	GRN	ELK4 (GRN) LIMS2
82855	1.0	GRN	ELK4 (GRN) TOR4A
82854	1.0	GRN	ELK4 (GRN) OIP5
82853	0.0	GRN	ELK4 (GRN) ZNF320
82852	0.0	GRN	ELK4 (GRN) ADAL
82851	1.0	GRN	ELK4 (GRN) VWF
82850	0.0	GRN	ELK4 (GRN) NLRP9
82849	1.0	GRN	ELK4 (GRN) TRIP13
82848	0.0	GRN	ELK4 (GRN) CAPN8
82847	1.0	GRN	ELK4 (GRN) COX5A
82846	1.0	GRN	ELK4 (GRN) SFTA3
82845	1.0	GRN	ELK4 (GRN) WNT5A
82844	1.0	GRN	ELK4 (GRN) INMT
82843	1.0	GRN	ELK4 (GRN) LPCAT1
82842	1.0	GRN	ELK4 (GRN) TRIM16L
82841	0.0	GRN	ELK4 (GRN) C15orf40
82840	1.0	GRN	ELK4 (GRN) SLC39A8
82839	1.0	GRN	ELK4 (GRN) NKX2-1
82838	1.0	GRN	ELK4 (GRN) RAE1
82837	1.0	GRN	ELK4 (GRN) AUNIP
82836	1.0	GRN	ELK4 (GRN) ARHGAP30
82835	1.0	GRN	ELK4 (GRN) SHE
82834	1.0	GRN	ELK4 (GRN) TRAIP
82810	1.0	GRN	ERF (GRN) TRIP13
82809	0.0	GRN	ERF (GRN) CAPN8
82808	1.0	GRN	ERF (GRN) SFTA3
82807	1.0	GRN	ERF (GRN) WNT5A
82806	1.0	GRN	ERF (GRN) LPCAT1
82805	1.0	GRN	ERF (GRN) TOR4A
82804	1.0	GRN	ERF (GRN) NKX2-1
82803	0.0	GRN	ERF (GRN) ZNF320
82802	1.0	GRN	ERF (GRN) SHE
82794	1.0	GRN	KLF5 (GRN) C15orf40
82792	1.0	GRN	MLX (GRN) SFTA3
82791	1.0	GRN	MLX (GRN) LPCAT1
82788	1.0	GRN	SREBF2 (GRN) SFTA3
82786	1.0	GRN	USF1 (GRN) OIP5
82785	0.0	GRN	USF1 (GRN) NLRP9
82784	1.0	GRN	USF1 (GRN) RFC4
82783	1.0	GRN	USF1 (GRN) RAD51
82782	1.0	GRN	USF1 (GRN) WNT5A
82781	1.0	GRN	USF1 (GRN) LPCAT1
82780	1.0	GRN	USF1 (GRN) TRIM16L
82779	1.0	GRN	USF1 (GRN) KNSTRN
82778	1.0	GRN	USF1 (GRN) C15orf40
82777	1.0	GRN	USF1 (GRN) TRAIP
82761	1.0	GRN	USF2 (GRN) OIP5
82760	1.0	GRN	USF2 (GRN) SLC22A31
82759	0.0	GRN	USF2 (GRN) DTD2
82758	1.0	GRN	USF2 (GRN) LPCAT1
82757	1.0	GRN	USF2 (GRN) KNSTRN
82756	0.0	GRN	USF2 (GRN) C15orf40
82745	0.0	GRN	ELF5 (GRN) SFTPD
82744	0.0	GRN	ELF5 (GRN) KCNQ3
82743	1.0	GRN	ELF5 (GRN) LPCAT1
82738	1.0	GRN	TFEB (GRN) OIP5
82737	1.0	GRN	TFEB (GRN) COX5A
82736	1.0	GRN	TFEB (GRN) KNSTRN
82735	1.0	GRN	TFEB (GRN) C15orf40
82728	0.0	GRN	EHF (GRN) SFTPD
82727	1.0	GRN	EHF (GRN) NLRP9
82726	1.0	GRN	EHF (GRN) SLC22A31
82725	1.0	GRN	EHF (GRN) LPCAT1
82724	0.0	GRN	EHF (GRN) NABP2
82723	1.0	GRN	EHF (GRN) ZNF320
82716	1.0	GRN	ELF3 (GRN) SFTPD
82715	0.0	GRN	ELF3 (GRN) NLRP9
82714	1.0	GRN	ELF3 (GRN) CD97
82713	1.0	GRN	ELF3 (GRN) SFTA2
82712	1.0	GRN	ELF3 (GRN) MYO1F
82711	1.0	GRN	ELF3 (GRN) C2orf44
82710	1.0	GRN	ELF3 (GRN) LPCAT1
82709	0.0	GRN	ELF3 (GRN) CORO1A
82703	0.0	GRN	ETV1 (GRN) LIMS2
82702	0.0	GRN	ETV1 (GRN) LPCAT1
82699	0.0	GRN	RFX1 (GRN) TGM3
82696	0.0	GRN	RFX2 (GRN) GPX2
82695	1.0	GRN	RFX2 (GRN) C1orf192
82694	1.0	GRN	RFX2 (GRN) SOX2
82693	0.0	GRN	RFX2 (GRN) GSTA1
82692	1.0	GRN	RFX2 (GRN) SFTPA2
82691	1.0	GRN	RFX2 (GRN) TP63
82685	0.0	GRN	RFX3 (GRN) GPX2
82684	1.0	GRN	RFX3 (GRN) C1orf192
82683	1.0	GRN	RFX3 (GRN) SOX2
82682	0.0	GRN	RFX3 (GRN) TGM3
82681	0.0	GRN	RFX3 (GRN) GSTA1
82680	1.0	GRN	RFX3 (GRN) TP63
82675	0.0	GRN	RFX4 (GRN) C1orf192
82674	1.0	GRN	RFX4 (GRN) SOX2
82673	0.0	GRN	RFX4 (GRN) TP63
82670	0.0	GRN	EOMES (GRN) TGM3
82668	1.0	GRN	RFX5 (GRN) GPX2
82667	1.0	GRN	RFX5 (GRN) C1orf192
82666	1.0	GRN	RFX5 (GRN) SOX2
82665	0.0	GRN	RFX5 (GRN) GSTA1
82664	1.0	GRN	RFX5 (GRN) TP63
82660	1.0	GRN	ARID2 (GRN) C1orf192
82659	1.0	GRN	ARID2 (GRN) SOX2
82658	0.0	GRN	ARID2 (GRN) GSTA1
82655	1.0	GRN	ZBTB33 (GRN) LIMS2
82654	1.0	GRN	ZBTB33 (GRN) ITGB2
82653	1.0	GRN	ZBTB33 (GRN) CD97
82652	1.0	GRN	ZBTB33 (GRN) MYO1F
82651	1.0	GRN	ZBTB33 (GRN) LPCAT1
82650	0.0	GRN	ZBTB33 (GRN) CFB
82649	1.0	GRN	ZBTB33 (GRN) CORO1A
82644	0.0	GRN	JUN (GRN) TSPY8
82643	0.0	GRN	JUN (GRN) UCP1
82642	1.0	GRN	JUN (GRN) CDH12
82635	1.0	GRN	NR2F2 (GRN) PSMA4
82634	1.0	GRN	NR2F2 (GRN) COX5A
82633	1.0	GRN	NR2F2 (GRN) OIP5
82632	1.0	GRN	NR2F2 (GRN) C15orf40
82626	1.0	GRN	EGR4 (GRN) C1orf192
82624	1.0	GRN	EP300 (GRN) C1orf192
82622	1.0	GRN	MYPOP (GRN) NLRP9
82621	1.0	GRN	MYPOP (GRN) DTD2
82620	1.0	GRN	MYPOP (GRN) SFTA3
82616	1.0	GRN	NFYC (GRN) C1orf192
82614	1.0	GRN	TFAP2A (GRN) C1orf192
82612	1.0	GRN	TFAP2C (GRN) C1orf192
82610	1.0	GRN	ARNT (GRN) DTD2
82608	1.0	GRN	AR (GRN) NLRP9
82606	1.0	GRN	YBX1 (GRN) C1orf192
82604	0.0	GRN	NR0B1 (GRN) C1orf192
82602	0.0	GRN	HSF1 (GRN) C15orf40
82601	1.0	GRN	HSF1 (GRN) OIP5
82597	0.0	GRN	LMO2 (GRN) C1orf192
82595	0.0	GRN	TFAP2B (GRN) C1orf192
82593	1.0	GRN	BHLHE40 (GRN) C1orf192
82591	0.0	GRN	GSC2 (GRN) C1orf192
82589	1.0	GRN	MYBL1 (GRN) C1orf192
82587	1.0	GRN	ZBED1 (GRN) C1orf192
82585	1.0	GRN	E2F1 (GRN) NKX2-1
82583	1.0	GRN	PAX1 (GRN) C1orf192
82581	1.0	GRN	TFCP2L1 (GRN) C1orf192
82579	1.0	GRN	SCRT1 (GRN) C1orf192
82577	1.0	GRN	CLOCK (GRN) C1orf192
82575	1.0	GRN	CTCF (GRN) C1orf192
82573	0.0	GRN	MYOD1 (GRN) C1orf192
82571	1.0	GRN	ZBTB7C (GRN) C1orf192
82569	1.0	GRN	REST (GRN) C1orf192
82567	1.0	GRN	MZF1 (GRN) C1orf192
82565	0.0	GRN	KLF4 (GRN) C1orf192
82563	1.0	GRN	HIVEP2 (GRN) C1orf192
82561	1.0	GRN	GLIS3 (GRN) C1orf192
82559	1.0	GRN	KLF3 (GRN) C1orf192
82557	1.0	GRN	KLF8 (GRN) C1orf192
82555	1.0	GRN	RBPJ (GRN) C1orf192
82553	1.0	GRN	TP73 (GRN) C1orf192
82551	1.0	GRN	GLIS2 (GRN) C1orf192
82549	0.0	GRN	EGR2 (GRN) C1orf192
82547	1.0	GRN	ELK1 (GRN) SFTA3
82545	1.0	GRN	RUNX3 (GRN) C1orf192
82543	0.0	GRN	ID4 (GRN) C1orf192
82541	1.0	GRN	KLF1 (GRN) C1orf192
82539	0.0	GRN	NR5A2 (GRN) C1orf192
82537	1.0	GRN	SMAD2 (GRN) C1orf192
82535	1.0	GRN	SREBF1 (GRN) C1orf192
82533	1.0	GRN	ZIC4 (GRN) C1orf192
82531	1.0	GRN	ENO1 (GRN) C1orf192
82529	1.0	GRN	ARNT2 (GRN) C1orf192
82527	0.0	GRN	HAND2 (GRN) C1orf192
82525	1.0	GRN	ESRRA (GRN) C1orf192
82523	1.0	GRN	GMEB2 (GRN) C1orf192
82521	1.0	GRN	HIF1A (GRN) C1orf192
82519	0.0	GRN	NFIX (GRN) C1orf192
82517	1.0	GRN	ZBTB7A (GRN) C1orf192
82515	1.0	GRN	ZHX1 (GRN) C1orf192
82513	1.0	GRN	FOXK1 (GRN) C1orf192
82511	1.0	GRN	TP53 (GRN) C1orf192
82509	1.0	GRN	ATOH8 (GRN) C1orf192
82507	1.0	GRN	BHLHE41 (GRN) C1orf192
82505	1.0	GRN	MLXIPL (GRN) C1orf192
82503	1.0	GRN	HIC2 (GRN) C1orf192
82501	0.0	GRN	ZIC1 (GRN) C1orf192
82499	0.0	GRN	ASCL1 (GRN) C1orf192
82497	1.0	GRN	ZBTB4 (GRN) C1orf192
82495	1.0	GRN	ZNF202 (GRN) C1orf192
82493	0.0	GRN	PROX1 (GRN) C1orf192
82491	0.0	GRN	GLIS1 (GRN) C1orf192
82489	1.0	GRN	ETV2 (GRN) LPCAT1
83265	1.0	GRN	MXI1 (GRN) AKR1C1
83264	0.0	GRN	MXI1 (GRN) KIAA0319
83263	0.0	GRN	MXI1 (GRN) IQCG
83262	1.0	GRN	MXI1 (GRN) ABCC5
83261	1.0	GRN	MXI1 (GRN) ALDH3A1
83230	1.0	GRN	NRF1 (GRN) ACVRL1
83229	1.0	GRN	NRF1 (GRN) FGR
83228	1.0	GRN	NRF1 (GRN) SIGLEC9
83227	1.0	GRN	NRF1 (GRN) ZNF74
83226	1.0	GRN	NRF1 (GRN) TMEM100
83225	1.0	GRN	NRF1 (GRN) SNRPD3
83224	1.0	GRN	NRF1 (GRN) ST3GAL5
83223	1.0	GRN	NRF1 (GRN) SLAMF8
83222	1.0	GRN	NRF1 (GRN) HHIP
83221	1.0	GRN	NRF1 (GRN) PES1
83220	1.0	GRN	NRF1 (GRN) DPEP2
83219	1.0	GRN	NRF1 (GRN) ARHGDIB
83218	1.0	GRN	NRF1 (GRN) NDUFS6
83217	1.0	GRN	NRF1 (GRN) GALNT10
83216	1.0	GRN	NRF1 (GRN) ASAH1
83215	1.0	GRN	NRF1 (GRN) TOMM22
83214	1.0	GRN	NRF1 (GRN) ABCC5
83213	0.0	GRN	NRF1 (GRN) CD180
83212	1.0	GRN	NRF1 (GRN) DRG1
83211	1.0	GRN	NRF1 (GRN) MND1
83210	1.0	GRN	NRF1 (GRN) PCNA
83209	1.0	GRN	NRF1 (GRN) HCLS1
83208	1.0	GRN	NRF1 (GRN) CPM
83207	1.0	GRN	NRF1 (GRN) STEAP4
83206	1.0	GRN	NRF1 (GRN) MFNG
83205	1.0	GRN	NRF1 (GRN) TNS3
83157	1.0	GRN	ETV4 (GRN) POP5
83156	1.0	GRN	ETV4 (GRN) MRPL36
83155	1.0	GRN	ETV4 (GRN) NKX2-1
83148	1.0	GRN	ELF1 (GRN) NKX2-1
83147	1.0	GRN	ELF1 (GRN) EIF4G1
83138	1.0	GRN	SMARCC2 (GRN) ACVRL1
83137	1.0	GRN	SMARCC2 (GRN) C11orf82
83136	0.0	GRN	SMARCC2 (GRN) SLAMF8
83135	0.0	GRN	SMARCC2 (GRN) CD180
83134	1.0	GRN	SMARCC2 (GRN) HCLS1
83133	1.0	GRN	SMARCC2 (GRN) MFNG
83132	1.0	GRN	SMARCC2 (GRN) ABCC5
83122	1.0	GRN	BRCA1 (GRN) POP5
83121	0.0	GRN	BRCA1 (GRN) SFTPB
83120	1.0	GRN	BRCA1 (GRN) CAPN8
83119	1.0	GRN	BRCA1 (GRN) SHE
83118	1.0	GRN	BRCA1 (GRN) NKX2-1
83105	1.0	GRN	ELF4 (GRN) SFTPB
83104	0.0	GRN	ELF4 (GRN) CAPN8
83103	1.0	GRN	ELF4 (GRN) MRPL36
83102	1.0	GRN	ELF4 (GRN) C1orf162
83101	1.0	GRN	ELF4 (GRN) NKX2-1
83100	1.0	GRN	ELF4 (GRN) C1QBP
83099	1.0	GRN	ELF4 (GRN) MVP
83098	1.0	GRN	ELF4 (GRN) EIF4G1
83082	1.0	GRN	ETV3 (GRN) MRPL36
83081	1.0	GRN	ETV3 (GRN) TMEM100
83080	0.0	GRN	ETV3 (GRN) FGA
83079	1.0	GRN	ETV3 (GRN) C1orf162
83078	1.0	GRN	ETV3 (GRN) THEMIS2
83077	0.0	GRN	ETV3 (GRN) HCLS1
83076	1.0	GRN	ETV3 (GRN) CCDC69
83058	1.0	GRN	ETV6 (GRN) SFTA2
83057	0.0	GRN	ETV6 (GRN) VCP
83056	0.0	GRN	ETV6 (GRN) POP5
83055	1.0	GRN	ETV6 (GRN) ACVRL1
83054	1.0	GRN	ETV6 (GRN) SFTPB
83053	1.0	GRN	ETV6 (GRN) ARRB1
83052	1.0	GRN	ETV6 (GRN) MBIP
83051	1.0	GRN	ETV6 (GRN) HHIP
83050	1.0	GRN	ETV6 (GRN) C1orf162
83049	1.0	GRN	ETV6 (GRN) NKX2-1
83048	0.0	GRN	ETV6 (GRN) CD180
83047	1.0	GRN	ETV6 (GRN) ZWINT
83046	1.0	GRN	ETV6 (GRN) HCLS1
83045	1.0	GRN	ETV6 (GRN) CCDC69
83044	1.0	GRN	ETV6 (GRN) EIF4G1
82998	1.0	GRN	GABPA (GRN) VCP
82997	1.0	GRN	GABPA (GRN) POP5
82996	1.0	GRN	GABPA (GRN) ACVRL1
82995	1.0	GRN	GABPA (GRN) RPUSD2
82994	1.0	GRN	GABPA (GRN) NFAM1
82993	0.0	GRN	GABPA (GRN) SFTPB
82992	0.0	GRN	GABPA (GRN) CAPN8
82991	1.0	GRN	GABPA (GRN) TMEM79
82990	1.0	GRN	GABPA (GRN) GINS2
82989	0.0	GRN	GABPA (GRN) FGA
82988	1.0	GRN	GABPA (GRN) PRIM1
82987	1.0	GRN	GABPA (GRN) GINS1
82986	0.0	GRN	GABPA (GRN) SLAMF8
82985	1.0	GRN	GABPA (GRN) HHIP
82984	0.0	GRN	GABPA (GRN) NKX2-1
82983	1.0	GRN	GABPA (GRN) DPEP2
82982	1.0	GRN	GABPA (GRN) C1orf162
82981	0.0	GRN	GABPA (GRN) GALNT10
82980	1.0	GRN	GABPA (GRN) LIN9
82979	1.0	GRN	GABPA (GRN) C1QBP
82978	1.0	GRN	GABPA (GRN) SUV39H1
82977	0.0	GRN	GABPA (GRN) CD180
82976	1.0	GRN	GABPA (GRN) PTPLAD1
82975	1.0	GRN	GABPA (GRN) VWA9
82974	1.0	GRN	GABPA (GRN) PSAT1
82973	1.0	GRN	GABPA (GRN) THEMIS2
82972	1.0	GRN	GABPA (GRN) DSCC1
82971	1.0	GRN	GABPA (GRN) MND1
82970	1.0	GRN	GABPA (GRN) POLR3K
82969	0.0	GRN	GABPA (GRN) HCLS1
82968	1.0	GRN	GABPA (GRN) CCDC69
82967	1.0	GRN	GABPA (GRN) FAM103A1
82966	1.0	GRN	GABPA (GRN) MFNG
82913	1.0	GRN	NR2F6 (GRN) C11orf82
82912	0.0	GRN	NR2F6 (GRN) GTF2A2
82911	0.0	GRN	NR2F6 (GRN) MRPL46
82910	1.0	GRN	NR2F6 (GRN) DSCC1
82909	1.0	GRN	NR2F6 (GRN) POLR3K
82908	1.0	GRN	NR2F6 (GRN) FAM103A1
82905	1.0	GRN	SIX5 (GRN) ACVRL1
82904	0.0	GRN	SIX5 (GRN) CD180
82903	1.0	GRN	SIX5 (GRN) MFNG
82896	1.0	GRN	TOPORS (GRN) C11orf82
82895	1.0	GRN	TOPORS (GRN) NKX2-1
82894	1.0	GRN	TOPORS (GRN) GTF2A2
82893	1.0	GRN	TOPORS (GRN) VWA9
82892	1.0	GRN	TOPORS (GRN) DSCC1
82891	1.0	GRN	TOPORS (GRN) POLR3K
82890	1.0	GRN	TOPORS (GRN) FAM103A1
82889	1.0	GRN	TOPORS (GRN) MFNG
82878	1.0	GRN	PITX2 (GRN) POP5
82877	1.0	GRN	PITX2 (GRN) ACVRL1
82876	1.0	GRN	PITX2 (GRN) TIPIN
82875	0.0	GRN	PITX2 (GRN) SPC25
82874	1.0	GRN	PITX2 (GRN) GTF2A2
82873	1.0	GRN	PITX2 (GRN) ZNF320
82872	1.0	GRN	PITX2 (GRN) CD180
82871	0.0	GRN	PITX2 (GRN) TMEM79
82870	1.0	GRN	PITX2 (GRN) VWA9
82869	0.0	GRN	PITX2 (GRN) PSAT1
82868	0.0	GRN	PITX2 (GRN) DSCC1
82867	1.0	GRN	PITX2 (GRN) MFNG
82861	0.0	GRN	ARNTL (GRN) SFTPB
82860	0.0	GRN	ARNTL (GRN) CAPN8
82859	1.0	GRN	ARNTL (GRN) MBIP
82857	0.0	GRN	DDIT3 (GRN) SFTPB
82833	1.0	GRN	ELK4 (GRN) POP5
82832	1.0	GRN	ELK4 (GRN) ACVRL1
82831	1.0	GRN	ELK4 (GRN) MVP
82830	1.0	GRN	ELK4 (GRN) RPUSD2
82829	1.0	GRN	ELK4 (GRN) NFAM1
82828	0.0	GRN	ELK4 (GRN) SFTPB
82827	1.0	GRN	ELK4 (GRN) MRPL36
82826	1.0	GRN	ELK4 (GRN) TMEM100
82825	1.0	GRN	ELK4 (GRN) HHIP
82824	1.0	GRN	ELK4 (GRN) C1orf162
82823	1.0	GRN	ELK4 (GRN) GALNT10
82822	0.0	GRN	ELK4 (GRN) MRPL46
82821	1.0	GRN	ELK4 (GRN) C1QBP
82820	0.0	GRN	ELK4 (GRN) CD180
82819	0.0	GRN	ELK4 (GRN) PTPLAD1
82818	1.0	GRN	ELK4 (GRN) DSCC1
82817	1.0	GRN	ELK4 (GRN) GINS1
82816	1.0	GRN	ELK4 (GRN) MND1
82815	1.0	GRN	ELK4 (GRN) POLR3K
82814	1.0	GRN	ELK4 (GRN) HCLS1
82813	1.0	GRN	ELK4 (GRN) CCDC69
82812	1.0	GRN	ELK4 (GRN) FAM103A1
82801	1.0	GRN	ERF (GRN) MRPL36
82800	1.0	GRN	ERF (GRN) TMEM100
82799	1.0	GRN	ERF (GRN) HHIP
82798	1.0	GRN	ERF (GRN) TRIM16L
82797	0.0	GRN	ERF (GRN) CD180
82796	1.0	GRN	ERF (GRN) THEMIS2
82795	1.0	GRN	ERF (GRN) CCDC69
82793	1.0	GRN	KLF5 (GRN) OIP5
82790	1.0	GRN	MLX (GRN) HHIP
82789	1.0	GRN	MLX (GRN) NKX2-1
82787	1.0	GRN	SREBF2 (GRN) HHIP
82776	1.0	GRN	USF1 (GRN) MVP
82775	1.0	GRN	USF1 (GRN) SFTPB
82774	1.0	GRN	USF1 (GRN) COQ3
82773	1.0	GRN	USF1 (GRN) GTF2A2
82772	1.0	GRN	USF1 (GRN) NKX2-1
82771	1.0	GRN	USF1 (GRN) GALNT10
82770	0.0	GRN	USF1 (GRN) MRPL46
82769	1.0	GRN	USF1 (GRN) C1QBP
82768	1.0	GRN	USF1 (GRN) PSAT1
82767	1.0	GRN	USF1 (GRN) ACAT2
82766	1.0	GRN	USF1 (GRN) MTFMT
82765	1.0	GRN	USF1 (GRN) DSCC1
82764	1.0	GRN	USF1 (GRN) POLR3K
82763	1.0	GRN	USF1 (GRN) FAM103A1
82755	1.0	GRN	USF2 (GRN) MVP
82754	1.0	GRN	USF2 (GRN) CAPN8
82753	1.0	GRN	USF2 (GRN) MBIP
82752	1.0	GRN	USF2 (GRN) NKX2-1
82751	1.0	GRN	USF2 (GRN) GALNT10
82750	0.0	GRN	USF2 (GRN) MRPL46
82749	1.0	GRN	USF2 (GRN) MTFMT
82748	1.0	GRN	USF2 (GRN) POLR3K
82747	1.0	GRN	USF2 (GRN) C1QBP
82746	1.0	GRN	USF2 (GRN) FAM103A1
82742	1.0	GRN	ELF5 (GRN) SFTA2
82741	1.0	GRN	ELF5 (GRN) NECAB1
82740	1.0	GRN	ELF5 (GRN) NKX2-1
82734	0.0	GRN	TFEB (GRN) MVP
82733	0.0	GRN	TFEB (GRN) GALNT10
82732	1.0	GRN	TFEB (GRN) MTFMT
82731	1.0	GRN	TFEB (GRN) DSCC1
82730	1.0	GRN	TFEB (GRN) POLR3K
82729	1.0	GRN	TFEB (GRN) FAM103A1
82722	1.0	GRN	EHF (GRN) SFTA2
82721	1.0	GRN	EHF (GRN) SFTPB
82720	1.0	GRN	EHF (GRN) CAPN8
82719	1.0	GRN	EHF (GRN) NKX2-1
82718	1.0	GRN	EHF (GRN) TMEM79
82717	1.0	GRN	EHF (GRN) EIF4G1
82708	1.0	GRN	ELF3 (GRN) SFTPB
82707	1.0	GRN	ELF3 (GRN) ALDH3B1
82706	0.0	GRN	ELF3 (GRN) FGA
82705	0.0	GRN	ELF3 (GRN) ZNF320
82704	1.0	GRN	ELF3 (GRN) NKX2-1
82701	1.0	GRN	ETV1 (GRN) POP5
82700	0.0	GRN	ETV1 (GRN) NKX2-1
82698	1.0	GRN	RFX1 (GRN) AKAP14
82690	0.0	GRN	RFX2 (GRN) KIAA0319
82689	1.0	GRN	RFX2 (GRN) IQCG
82688	0.0	GRN	RFX2 (GRN) C11orf53
82687	1.0	GRN	RFX2 (GRN) ALDH3A1
82679	0.0	GRN	RFX3 (GRN) KIAA0319
82678	1.0	GRN	RFX3 (GRN) IQCG
82677	1.0	GRN	RFX3 (GRN) AKAP14
82676	0.0	GRN	RFX3 (GRN) ALDH3A1
82672	0.0	GRN	RFX4 (GRN) IQCG
82671	0.0	GRN	RFX4 (GRN) ALDH3A1
82669	1.0	GRN	EOMES (GRN) AKAP14
82663	0.0	GRN	RFX5 (GRN) KIAA0319
82662	0.0	GRN	RFX5 (GRN) IQCG
82661	0.0	GRN	RFX5 (GRN) ALDH3A1
82657	0.0	GRN	ARID2 (GRN) IQCG
82656	1.0	GRN	ARID2 (GRN) TP63
82648	0.0	GRN	ZBTB33 (GRN) POP5
82647	1.0	GRN	ZBTB33 (GRN) ALDH3B1
82646	1.0	GRN	ZBTB33 (GRN) NKX2-1
82641	0.0	GRN	JUN (GRN) TSPY6P
82640	1.0	GRN	JUN (GRN) HOXB1
82639	1.0	GRN	JUN (GRN) CYP4F2
82631	1.0	GRN	NR2F2 (GRN) GTF2A2
82630	1.0	GRN	NR2F2 (GRN) MRPL46
82629	1.0	GRN	NR2F2 (GRN) DSCC1
82628	1.0	GRN	NR2F2 (GRN) POLR3K
82627	1.0	GRN	NR2F2 (GRN) FAM103A1
82625	0.0	GRN	EGR4 (GRN) IQCG
82623	0.0	GRN	EP300 (GRN) IQCG
82619	0.0	GRN	MYPOP (GRN) SFTPB
82618	1.0	GRN	MYPOP (GRN) MBIP
82617	1.0	GRN	MYPOP (GRN) HHIP
82615	0.0	GRN	NFYC (GRN) IQCG
82613	1.0	GRN	TFAP2A (GRN) IQCG
82611	1.0	GRN	TFAP2C (GRN) IQCG
82609	1.0	GRN	ARNT (GRN) MBIP
82607	0.0	GRN	AR (GRN) SFTPB
82605	0.0	GRN	YBX1 (GRN) IQCG
82603	0.0	GRN	NR0B1 (GRN) IQCG
82600	1.0	GRN	HSF1 (GRN) DSCC1
82599	1.0	GRN	HSF1 (GRN) POLR3K
82598	1.0	GRN	HSF1 (GRN) FAM103A1
82596	1.0	GRN	LMO2 (GRN) IQCG
82594	0.0	GRN	TFAP2B (GRN) IQCG
82592	0.0	GRN	BHLHE40 (GRN) IQCG
82590	0.0	GRN	GSC2 (GRN) IQCG
82588	0.0	GRN	MYBL1 (GRN) IQCG
82586	0.0	GRN	ZBED1 (GRN) IQCG
82584	1.0	GRN	E2F1 (GRN) KIAA0408
82582	0.0	GRN	PAX1 (GRN) IQCG
82580	1.0	GRN	TFCP2L1 (GRN) IQCG
82578	0.0	GRN	SCRT1 (GRN) IQCG
82576	0.0	GRN	CLOCK (GRN) IQCG
82574	0.0	GRN	CTCF (GRN) IQCG
82572	0.0	GRN	MYOD1 (GRN) IQCG
82570	0.0	GRN	ZBTB7C (GRN) IQCG
82568	0.0	GRN	REST (GRN) IQCG
82566	0.0	GRN	MZF1 (GRN) IQCG
82564	1.0	GRN	KLF4 (GRN) IQCG
82562	1.0	GRN	HIVEP2 (GRN) IQCG
82560	1.0	GRN	GLIS3 (GRN) IQCG
82558	0.0	GRN	KLF3 (GRN) IQCG
82556	0.0	GRN	KLF8 (GRN) IQCG
82554	1.0	GRN	RBPJ (GRN) IQCG
82552	1.0	GRN	TP73 (GRN) IQCG
82550	1.0	GRN	GLIS2 (GRN) IQCG
82548	1.0	GRN	EGR2 (GRN) IQCG
82546	1.0	GRN	ELK1 (GRN) HHIP
82544	0.0	GRN	RUNX3 (GRN) IQCG
82542	1.0	GRN	ID4 (GRN) IQCG
82540	0.0	GRN	KLF1 (GRN) IQCG
82538	1.0	GRN	NR5A2 (GRN) IQCG
82536	0.0	GRN	SMAD2 (GRN) IQCG
82534	1.0	GRN	SREBF1 (GRN) IQCG
82532	0.0	GRN	ZIC4 (GRN) IQCG
82530	1.0	GRN	ENO1 (GRN) IQCG
82528	1.0	GRN	ARNT2 (GRN) IQCG
82526	0.0	GRN	HAND2 (GRN) IQCG
82524	0.0	GRN	ESRRA (GRN) IQCG
82522	0.0	GRN	GMEB2 (GRN) IQCG
82520	1.0	GRN	HIF1A (GRN) IQCG
82518	1.0	GRN	NFIX (GRN) IQCG
82516	1.0	GRN	ZBTB7A (GRN) IQCG
82514	0.0	GRN	ZHX1 (GRN) IQCG
82512	0.0	GRN	FOXK1 (GRN) IQCG
82510	0.0	GRN	TP53 (GRN) IQCG
82508	1.0	GRN	ATOH8 (GRN) IQCG
82506	1.0	GRN	BHLHE41 (GRN) IQCG
82504	0.0	GRN	MLXIPL (GRN) IQCG
82502	0.0	GRN	HIC2 (GRN) IQCG
82500	0.0	GRN	ZIC1 (GRN) IQCG
82498	0.0	GRN	ASCL1 (GRN) IQCG
82496	1.0	GRN	ZBTB4 (GRN) IQCG
82494	1.0	GRN	ZNF202 (GRN) IQCG
82492	0.0	GRN	PROX1 (GRN) IQCG
82490	0.0	GRN	GLIS1 (GRN) IQCG
82488	1.0	GRN	ETV2 (GRN) NKX2-1
83260	-1.0	GCN	CYP4F11 (GCN) AKR1B10
83259	-1.0	GCN	AKR1B10 (GCN) AKR1C1
83258	-1.0	GCN	GPX2 (GCN) KIAA0319
83257	-1.0	GCN	C1orf192 (GCN) IQCG
83256	-1.0	GCN	SOX2 (GCN) TP63
83255	-1.0	GCN	GSTA1 (GCN) TP63
83254	-1.0	GCN	STK33 (GCN) ABCC5
83253	-1.0	GCN	TP63 (GCN) ALDH3A1
83204	-1.0	GCN	LRRC25 (GCN) ALDH3B1
83203	-1.0	GCN	TOR4A (GCN) ACVRL1
83198	-1.0	GCN	ALDH3B1 (GCN) FGR
83197	-1.0	GCN	ALDH3B1 (GCN) SIGLEC9
83195	-1.0	GCN	CCR1 (GCN) ALDH3B1
83194	-1.0	GCN	VWF (GCN) SHE
83193	-1.0	GCN	ITGB2 (GCN) ALDH3B1
83192	-1.0	GCN	CDC45 (GCN) ZNF74
83180	-1.0	GCN	CD97 (GCN) ALDH3B1
83178	-1.0	GCN	CAPN8 (GCN) TMEM100
83177	-1.0	GCN	TGFBR2 (GCN) ALDH3B1
83191	-1.0	GCN	CDC45 (GCN) SNRPD3
83190	-1.0	GCN	CDC45 (GCN) ST3GAL5
83202	-1.0	GCN	TOR4A (GCN) SLAMF8
83175	-1.0	GCN	SFTA3 (GCN) HHIP
83189	-1.0	GCN	CDC45 (GCN) PES1
83174	-1.0	GCN	SHE (GCN) DPEP2
83172	-1.0	GCN	MYO1F (GCN) ALDH3B1
83196	-1.0	GCN	ALDH3B1 (GCN) ARHGDIB
83171	-1.0	GCN	SMARCB1 (GCN) CDC45
83170	-1.0	GCN	TRIP13 (GCN) NDUFS6
83188	-1.0	GCN	CDC45 (GCN) GALNT10
83187	-1.0	GCN	CDC45 (GCN) ASAH1
83186	-1.0	GCN	CDC45 (GCN) TOMM22
83168	-1.0	GCN	PSMC5 (GCN) ABCC5
83201	-1.0	GCN	TOR4A (GCN) CD180
83200	-1.0	GCN	TOR4A (GCN) ALDH3B1
83167	-1.0	GCN	UNC13D (GCN) CDC45
83179	-1.0	GCN	CD97 (GCN) CDC45
83185	-1.0	GCN	CDC45 (GCN) DRG1
83166	-1.0	GCN	AUNIP (GCN) MND1
83165	-1.0	GCN	POLDIP2 (GCN) ABCC5
83184	-1.0	GCN	CDC45 (GCN) PCNA
83164	-1.0	GCN	ARHGAP30 (GCN) HCLS1
83163	-1.0	GCN	MCM5 (GCN) CDC45
83183	-1.0	GCN	CDC45 (GCN) CPM
83182	-1.0	GCN	CDC45 (GCN) STEAP4
83162	-1.0	GCN	CORO1A (GCN) ALDH3B1
83199	-1.0	GCN	TOR4A (GCN) MFNG
83181	-1.0	GCN	CDC45 (GCN) TNS3
83154	-1.0	GCN	LIMS2 (GCN) POP5
83169	-1.0	GCN	TRIP13 (GCN) MRPL36
83152	-1.0	GCN	INMT (GCN) NKX2-1
83151	-1.0	GCN	LPCAT1 (GCN) NKX2-1
83146	-1.0	GCN	ZNF320 (GCN) EIF4G1
83131	-1.0	GCN	CENPO (GCN) C11orf82
83128	-1.0	GCN	DNAJC19 (GCN) ABCC5
83117	-1.0	GCN	NLRP9 (GCN) SFTPB
83116	-1.0	GCN	SLC22A31 (GCN) CAPN8
83115	-1.0	GCN	RHOBTB2 (GCN) SHE
83097	-1.0	GCN	MC4R (GCN) SFTPB
83096	-1.0	GCN	WNT5A (GCN) TRIM16L
83145	-1.0	GCN	ZNF320 (GCN) C1orf162
83095	-1.0	GCN	TRIM16L (GCN) C1QBP
83094	-1.0	GCN	KNSTRN (GCN) MVP
83075	-1.0	GCN	SFTA2 (GCN) FGA
83074	-1.0	GCN	NKX2-1 (GCN) TMEM100
83144	-1.0	GCN	ZNF320 (GCN) THEMIS2
83173	-1.0	GCN	SHE (GCN) CCDC69
83043	-1.0	GCN	SFTPD (GCN) SFTA2
83153	-1.0	GCN	LIMS2 (GCN) VCP
83042	-1.0	GCN	ST3GAL5 (GCN) ARRB1
83040	-1.0	GCN	DTD2 (GCN) MBIP
83039	-1.0	GCN	SLC39A8 (GCN) SHE
83038	-1.0	GCN	H2AFY2 (GCN) ZWINT
82965	-1.0	GCN	OIP5 (GCN) MVP
82945	-1.0	GCN	TIMELESS (GCN) TROAP
82964	-1.0	GCN	OIP5 (GCN) RPUSD2
83143	-1.0	GCN	ZNF320 (GCN) NFAM1
82963	-1.0	GCN	OIP5 (GCN) TROAP
82944	-1.0	GCN	ADAL (GCN) OIP5
82943	-1.0	GCN	FOXM1 (GCN) TROAP
82942	-1.0	GCN	RFC5 (GCN) TROAP
83130	-1.0	GCN	CENPO (GCN) SPC25
83093	-1.0	GCN	KNSTRN (GCN) TROAP
82940	-1.0	GCN	TROAP (GCN) MVP
83129	-1.0	GCN	CENPO (GCN) TROAP
82962	-1.0	GCN	OIP5 (GCN) CDCA5
82935	-1.0	GCN	TMEM45B (GCN) TMEM79
82934	-1.0	GCN	MVP (GCN) SPC25
83092	-1.0	GCN	KNSTRN (GCN) SPC25
82941	-1.0	GCN	RFC5 (GCN) SPC25
82939	-1.0	GCN	TROAP (GCN) GINS2
82933	-1.0	GCN	CDCA5 (GCN) RAD51
82931	-1.0	GCN	PIK3R6 (GCN) SHE
82930	-1.0	GCN	SPC25 (GCN) PRIM1
82938	-1.0	GCN	TROAP (GCN) GINS1
82929	-1.0	GCN	COX5A (GCN) OIP5
82932	-1.0	GCN	CDCA5 (GCN) TROAP
82928	-1.0	GCN	COX5A (GCN) RAD51
83176	-1.0	GCN	TGFBR2 (GCN) TROAP
82927	-1.0	GCN	RNASEH2A (GCN) TROAP
82926	-1.0	GCN	YEATS4 (GCN) TROAP
82961	-1.0	GCN	OIP5 (GCN) GALNT10
82960	-1.0	GCN	OIP5 (GCN) LIN9
82937	-1.0	GCN	TROAP (GCN) SUV39H1
82959	-1.0	GCN	OIP5 (GCN) PTPLAD1
82958	-1.0	GCN	OIP5 (GCN) VWA9
82925	-1.0	GCN	RAD51 (GCN) PSAT1
82922	-1.0	GCN	C15orf40 (GCN) OIP5
82957	-1.0	GCN	OIP5 (GCN) DSCC1
83041	-1.0	GCN	ST3GAL5 (GCN) RAD51
82956	-1.0	GCN	OIP5 (GCN) RFC5
82924	-1.0	GCN	RAD51 (GCN) TROAP
82921	-1.0	GCN	SKP2 (GCN) CDCA5
82955	-1.0	GCN	OIP5 (GCN) POLR3K
82920	-1.0	GCN	TRAIP (GCN) OIP5
82954	-1.0	GCN	OIP5 (GCN) C1QBP
82953	-1.0	GCN	OIP5 (GCN) FAM103A1
82936	-1.0	GCN	TROAP (GCN) GALNT10
82952	-1.0	GCN	OIP5 (GCN) C11orf82
82907	-1.0	GCN	PSMA4 (GCN) OIP5
82951	-1.0	GCN	OIP5 (GCN) GTF2A2
82950	-1.0	GCN	OIP5 (GCN) MRPL46
82949	-1.0	GCN	OIP5 (GCN) TIPIN
82866	-1.0	GCN	C2orf44 (GCN) ZNF320
82865	-1.0	GCN	NABP2 (GCN) TMEM79
82811	-1.0	GCN	RAE1 (GCN) GINS1
82762	-1.0	GCN	RFC4 (GCN) MVP
82923	-1.0	GCN	RAD51 (GCN) COQ3
82948	-1.0	GCN	OIP5 (GCN) ACAT2
82947	-1.0	GCN	OIP5 (GCN) MTFMT
82946	-1.0	GCN	OIP5 (GCN) RFC4
82739	-1.0	GCN	KCNQ3 (GCN) NECAB1
82697	-1.0	GCN	TGM3 (GCN) AKAP14
82686	-1.0	GCN	SFTPA2 (GCN) C11orf53
82645	-1.0	GCN	CFB (GCN) ALDH3B1
82638	-1.0	GCN	TSPY8 (GCN) TSPY6P
82637	-1.0	GCN	UCP1 (GCN) HOXB1
82636	-1.0	GCN	CDH12 (GCN) CYP4F2
83073	-1.0	GCN	NKX2-1 (GCN) KIAA0408
