# Supplementary material
Source: publisher figshare collection journal article supplement (https://springernature.figshare.com/ndownloader/files/35041376)
Supplement: Supplementary file 1 [file 35041376 › CytoscapeSession-2021_06_28-02_05/tables/82198-lung_GRN4TCGA_LUSC.txt_2/SHARED_ATTRS-org.cytoscape.model.CyNetwork-82198+shared+network.cytable]

"CyCSV-Version","1"
"SUID","shared name"
"java.lang.Long","java.lang.String"
"",""
"82198 shared network",""
"82224","lung_GRN4TCGA_LUSC.txt_2"
"82198",
