# Supplementary material
Source: publisher figshare collection journal article supplement (https://springernature.figshare.com/ndownloader/files/35041376)
Supplement: Supplementary file 1 [file 35041376 › CytoscapeSession-2021_06_28-02_05/tables/82198-lung_GRN4TCGA_LUSC.txt_2/SHARED_ATTRS-org.cytoscape.model.CyNode-82198+shared+node.cytable]

CyCSV-Version	1
SUID	shared name
java.lang.Long	java.lang.String
82198 shared node
82487	MXI1
82486	CYP4F11
82485	AKR1B10
82484	GPX2
82483	C1orf192
82482	SOX2
82481	GSTA1
82480	STK33
82479	TP63
82478	NRF1
82477	LRRC25
82476	TOR4A
82475	ALDH3B1
82474	CCR1
82473	VWF
82472	ITGB2
82471	CDC45
82470	CD97
82469	CAPN8
82468	TGFBR2
82467	SFTA3
82466	SHE
82465	MYO1F
82464	SMARCB1
82463	TRIP13
82462	PSMC5
82461	UNC13D
82460	AUNIP
82459	POLDIP2
82458	ARHGAP30
82457	MCM5
82456	CORO1A
82455	ETV4
82454	LIMS2
82453	INMT
82452	LPCAT1
82451	ELF1
82450	ZNF320
82449	SMARCC2
82448	CENPO
82447	DNAJC19
82446	BRCA1
82445	NLRP9
82444	SLC22A31
82443	RHOBTB2
82442	ELF4
82441	MC4R
82440	WNT5A
82439	TRIM16L
82438	KNSTRN
82437	ETV3
82436	SFTA2
82435	NKX2-1
82434	ETV6
82433	SFTPD
82432	ST3GAL5
82431	DTD2
82430	SLC39A8
82429	H2AFY2
82428	GABPA
82427	OIP5
82426	TIMELESS
82425	ADAL
82424	FOXM1
82423	RFC5
82422	TROAP
82421	TMEM45B
82420	MVP
82419	CDCA5
82418	PIK3R6
82417	SPC25
82416	COX5A
82415	RNASEH2A
82414	YEATS4
82413	RAD51
82412	C15orf40
82411	SKP2
82410	TRAIP
82409	NR2F6
82408	PSMA4
82407	SIX5
82406	TOPORS
82405	PITX2
82404	C2orf44
82403	NABP2
82402	ARNTL
82401	DDIT3
82400	ELK4
82399	RAE1
82398	ERF
82397	KLF5
82396	MLX
82395	SREBF2
82394	USF1
82393	RFC4
82392	USF2
82391	ELF5
82390	KCNQ3
82389	TFEB
82388	EHF
82387	ELF3
82386	ETV1
82385	RFX1
82384	TGM3
82383	RFX2
82382	SFTPA2
82381	RFX3
82380	RFX4
82379	EOMES
82378	RFX5
82377	ARID2
82376	ZBTB33
82375	CFB
82374	JUN
82373	TSPY8
82372	UCP1
82371	CDH12
82370	NR2F2
82369	EGR4
82368	EP300
82367	MYPOP
82366	NFYC
82365	TFAP2A
82364	TFAP2C
82363	ARNT
82362	AR
82361	YBX1
82360	NR0B1
82359	HSF1
82358	LMO2
82357	TFAP2B
82356	BHLHE40
82355	GSC2
82354	MYBL1
82353	ZBED1
82352	E2F1
82351	PAX1
82350	TFCP2L1
82349	SCRT1
82348	CLOCK
82347	CTCF
82346	MYOD1
82345	ZBTB7C
82344	REST
82343	MZF1
82342	KLF4
82341	HIVEP2
82340	GLIS3
82339	KLF3
82338	KLF8
82337	RBPJ
82336	TP73
82335	GLIS2
82334	EGR2
82333	ELK1
82332	RUNX3
82331	ID4
82330	KLF1
82329	NR5A2
82328	SMAD2
82327	SREBF1
82326	ZIC4
82325	ENO1
82324	ARNT2
82323	HAND2
82322	ESRRA
82321	GMEB2
82320	HIF1A
82319	NFIX
82318	ZBTB7A
82317	ZHX1
82316	FOXK1
82315	TP53
82314	ATOH8
82313	BHLHE41
82312	MLXIPL
82311	HIC2
82310	ZIC1
82309	ASCL1
82308	ZBTB4
82307	ZNF202
82306	PROX1
82305	GLIS1
82304	ETV2
82303	AKR1C1
82302	KIAA0319
82301	IQCG
82300	ABCC5
82299	ALDH3A1
82298	ACVRL1
82297	FGR
82296	SIGLEC9
82295	ZNF74
82294	TMEM100
82293	SNRPD3
82292	SLAMF8
82291	HHIP
82290	PES1
82289	DPEP2
82288	ARHGDIB
82287	NDUFS6
82286	GALNT10
82285	ASAH1
82284	TOMM22
82283	CD180
82282	DRG1
82281	MND1
82280	PCNA
82279	HCLS1
82278	CPM
82277	STEAP4
82276	MFNG
82275	TNS3
82274	POP5
82273	MRPL36
82272	EIF4G1
82271	C11orf82
82270	SFTPB
82269	C1orf162
82268	C1QBP
82267	FGA
82266	THEMIS2
82265	CCDC69
82264	VCP
82263	ARRB1
82262	MBIP
82261	ZWINT
82260	RPUSD2
82259	NFAM1
82258	TMEM79
82257	GINS2
82256	PRIM1
82255	GINS1
82254	LIN9
82253	SUV39H1
82252	PTPLAD1
82251	VWA9
82250	PSAT1
82249	DSCC1
82248	POLR3K
82247	FAM103A1
82246	GTF2A2
82245	MRPL46
82244	TIPIN
82243	COQ3
82242	ACAT2
82241	MTFMT
82240	NECAB1
82239	AKAP14
82238	C11orf53
82237	TSPY6P
82236	HOXB1
82235	CYP4F2
82234	KIAA0408
