# Supplementary material
Source: publisher figshare collection journal article supplement (https://springernature.figshare.com/ndownloader/files/35041376)
Supplement: Supplementary file 1 [file 35041376 › CytoscapeSession-2021_06_28-02_05/tables/82224-lung_GRN4TCGA_LUSC.txt_2/LOCAL_ATTRS-org.cytoscape.model.CyEdge-lung_GRN4TCGA_LUSC.txt_2+default+edge.cytable]

CyCSV-Version	1
SUID	interaction	name	selected
java.lang.Long	java.lang.String	java.lang.String	java.lang.Boolean
lung_GRN4TCGA_LUSC.txt_2 default edge
82488	GRN	ETV2 (GRN) NKX2-1	false
82489	GRN	ETV2 (GRN) LPCAT1	false
82490	GRN	GLIS1 (GRN) IQCG	false
82491	GRN	GLIS1 (GRN) C1orf192	false
82492	GRN	PROX1 (GRN) IQCG	false
82493	GRN	PROX1 (GRN) C1orf192	false
82494	GRN	ZNF202 (GRN) IQCG	false
82495	GRN	ZNF202 (GRN) C1orf192	false
82496	GRN	ZBTB4 (GRN) IQCG	false
82497	GRN	ZBTB4 (GRN) C1orf192	false
82498	GRN	ASCL1 (GRN) IQCG	false
82499	GRN	ASCL1 (GRN) C1orf192	false
82500	GRN	ZIC1 (GRN) IQCG	false
82501	GRN	ZIC1 (GRN) C1orf192	false
82502	GRN	HIC2 (GRN) IQCG	false
82503	GRN	HIC2 (GRN) C1orf192	false
82504	GRN	MLXIPL (GRN) IQCG	false
82505	GRN	MLXIPL (GRN) C1orf192	false
82506	GRN	BHLHE41 (GRN) IQCG	false
82507	GRN	BHLHE41 (GRN) C1orf192	false
82508	GRN	ATOH8 (GRN) IQCG	false
82509	GRN	ATOH8 (GRN) C1orf192	false
82510	GRN	TP53 (GRN) IQCG	false
82511	GRN	TP53 (GRN) C1orf192	false
82512	GRN	FOXK1 (GRN) IQCG	false
82513	GRN	FOXK1 (GRN) C1orf192	false
82514	GRN	ZHX1 (GRN) IQCG	false
82515	GRN	ZHX1 (GRN) C1orf192	false
82516	GRN	ZBTB7A (GRN) IQCG	false
82517	GRN	ZBTB7A (GRN) C1orf192	false
82518	GRN	NFIX (GRN) IQCG	false
82519	GRN	NFIX (GRN) C1orf192	false
82520	GRN	HIF1A (GRN) IQCG	false
82521	GRN	HIF1A (GRN) C1orf192	false
82522	GRN	GMEB2 (GRN) IQCG	false
82523	GRN	GMEB2 (GRN) C1orf192	false
82524	GRN	ESRRA (GRN) IQCG	false
82525	GRN	ESRRA (GRN) C1orf192	false
82526	GRN	HAND2 (GRN) IQCG	false
82527	GRN	HAND2 (GRN) C1orf192	false
82528	GRN	ARNT2 (GRN) IQCG	false
82529	GRN	ARNT2 (GRN) C1orf192	false
82530	GRN	ENO1 (GRN) IQCG	false
82531	GRN	ENO1 (GRN) C1orf192	false
82532	GRN	ZIC4 (GRN) IQCG	false
82533	GRN	ZIC4 (GRN) C1orf192	false
82534	GRN	SREBF1 (GRN) IQCG	false
82535	GRN	SREBF1 (GRN) C1orf192	false
82536	GRN	SMAD2 (GRN) IQCG	false
82537	GRN	SMAD2 (GRN) C1orf192	false
82538	GRN	NR5A2 (GRN) IQCG	false
82539	GRN	NR5A2 (GRN) C1orf192	false
82540	GRN	KLF1 (GRN) IQCG	false
82541	GRN	KLF1 (GRN) C1orf192	false
82542	GRN	ID4 (GRN) IQCG	false
82543	GRN	ID4 (GRN) C1orf192	false
82544	GRN	RUNX3 (GRN) IQCG	false
82545	GRN	RUNX3 (GRN) C1orf192	false
82546	GRN	ELK1 (GRN) HHIP	false
82547	GRN	ELK1 (GRN) SFTA3	false
82548	GRN	EGR2 (GRN) IQCG	false
82549	GRN	EGR2 (GRN) C1orf192	false
82550	GRN	GLIS2 (GRN) IQCG	false
82551	GRN	GLIS2 (GRN) C1orf192	false
82552	GRN	TP73 (GRN) IQCG	false
82553	GRN	TP73 (GRN) C1orf192	false
82554	GRN	RBPJ (GRN) IQCG	false
82555	GRN	RBPJ (GRN) C1orf192	false
82556	GRN	KLF8 (GRN) IQCG	false
82557	GRN	KLF8 (GRN) C1orf192	false
82558	GRN	KLF3 (GRN) IQCG	false
82559	GRN	KLF3 (GRN) C1orf192	false
82560	GRN	GLIS3 (GRN) IQCG	false
82561	GRN	GLIS3 (GRN) C1orf192	false
82562	GRN	HIVEP2 (GRN) IQCG	false
82563	GRN	HIVEP2 (GRN) C1orf192	false
82564	GRN	KLF4 (GRN) IQCG	false
82565	GRN	KLF4 (GRN) C1orf192	false
82566	GRN	MZF1 (GRN) IQCG	false
82567	GRN	MZF1 (GRN) C1orf192	false
82568	GRN	REST (GRN) IQCG	false
82569	GRN	REST (GRN) C1orf192	false
82570	GRN	ZBTB7C (GRN) IQCG	false
82571	GRN	ZBTB7C (GRN) C1orf192	false
82572	GRN	MYOD1 (GRN) IQCG	false
82573	GRN	MYOD1 (GRN) C1orf192	false
82574	GRN	CTCF (GRN) IQCG	false
82575	GRN	CTCF (GRN) C1orf192	false
82576	GRN	CLOCK (GRN) IQCG	false
82577	GRN	CLOCK (GRN) C1orf192	false
82578	GRN	SCRT1 (GRN) IQCG	false
82579	GRN	SCRT1 (GRN) C1orf192	false
82580	GRN	TFCP2L1 (GRN) IQCG	false
82581	GRN	TFCP2L1 (GRN) C1orf192	false
82582	GRN	PAX1 (GRN) IQCG	false
82583	GRN	PAX1 (GRN) C1orf192	false
82584	GRN	E2F1 (GRN) KIAA0408	false
82585	GRN	E2F1 (GRN) NKX2-1	false
82586	GRN	ZBED1 (GRN) IQCG	false
82587	GRN	ZBED1 (GRN) C1orf192	false
82588	GRN	MYBL1 (GRN) IQCG	false
82589	GRN	MYBL1 (GRN) C1orf192	false
82590	GRN	GSC2 (GRN) IQCG	false
82591	GRN	GSC2 (GRN) C1orf192	false
82592	GRN	BHLHE40 (GRN) IQCG	false
82593	GRN	BHLHE40 (GRN) C1orf192	false
82594	GRN	TFAP2B (GRN) IQCG	false
82595	GRN	TFAP2B (GRN) C1orf192	false
82596	GRN	LMO2 (GRN) IQCG	false
82597	GRN	LMO2 (GRN) C1orf192	false
82598	GRN	HSF1 (GRN) FAM103A1	false
82599	GRN	HSF1 (GRN) POLR3K	false
82600	GRN	HSF1 (GRN) DSCC1	false
82601	GRN	HSF1 (GRN) OIP5	false
82602	GRN	HSF1 (GRN) C15orf40	false
82603	GRN	NR0B1 (GRN) IQCG	false
82604	GRN	NR0B1 (GRN) C1orf192	false
82605	GRN	YBX1 (GRN) IQCG	false
82606	GRN	YBX1 (GRN) C1orf192	false
82607	GRN	AR (GRN) SFTPB	false
82608	GRN	AR (GRN) NLRP9	false
82609	GRN	ARNT (GRN) MBIP	false
82610	GRN	ARNT (GRN) DTD2	false
82611	GRN	TFAP2C (GRN) IQCG	false
82612	GRN	TFAP2C (GRN) C1orf192	false
82613	GRN	TFAP2A (GRN) IQCG	false
82614	GRN	TFAP2A (GRN) C1orf192	false
82615	GRN	NFYC (GRN) IQCG	false
82616	GRN	NFYC (GRN) C1orf192	false
82617	GRN	MYPOP (GRN) HHIP	false
82618	GRN	MYPOP (GRN) MBIP	false
82619	GRN	MYPOP (GRN) SFTPB	false
82620	GRN	MYPOP (GRN) SFTA3	false
82621	GRN	MYPOP (GRN) DTD2	false
82622	GRN	MYPOP (GRN) NLRP9	false
82623	GRN	EP300 (GRN) IQCG	false
82624	GRN	EP300 (GRN) C1orf192	false
82625	GRN	EGR4 (GRN) IQCG	false
82626	GRN	EGR4 (GRN) C1orf192	false
82627	GRN	NR2F2 (GRN) FAM103A1	false
82628	GRN	NR2F2 (GRN) POLR3K	false
82629	GRN	NR2F2 (GRN) DSCC1	false
82630	GRN	NR2F2 (GRN) MRPL46	false
82631	GRN	NR2F2 (GRN) GTF2A2	false
82632	GRN	NR2F2 (GRN) C15orf40	false
82633	GRN	NR2F2 (GRN) OIP5	false
82634	GRN	NR2F2 (GRN) COX5A	false
82635	GRN	NR2F2 (GRN) PSMA4	false
82636	GCN	CDH12 (GCN) CYP4F2	false
82637	GCN	UCP1 (GCN) HOXB1	false
82638	GCN	TSPY8 (GCN) TSPY6P	false
82639	GRN	JUN (GRN) CYP4F2	false
82640	GRN	JUN (GRN) HOXB1	false
82641	GRN	JUN (GRN) TSPY6P	false
82642	GRN	JUN (GRN) CDH12	false
82643	GRN	JUN (GRN) UCP1	false
82644	GRN	JUN (GRN) TSPY8	false
82645	GCN	CFB (GCN) ALDH3B1	false
82646	GRN	ZBTB33 (GRN) NKX2-1	false
82647	GRN	ZBTB33 (GRN) ALDH3B1	false
82648	GRN	ZBTB33 (GRN) POP5	false
82649	GRN	ZBTB33 (GRN) CORO1A	false
82650	GRN	ZBTB33 (GRN) CFB	false
82651	GRN	ZBTB33 (GRN) LPCAT1	false
82652	GRN	ZBTB33 (GRN) MYO1F	false
82653	GRN	ZBTB33 (GRN) CD97	false
82654	GRN	ZBTB33 (GRN) ITGB2	false
82655	GRN	ZBTB33 (GRN) LIMS2	false
82656	GRN	ARID2 (GRN) TP63	false
82657	GRN	ARID2 (GRN) IQCG	false
82658	GRN	ARID2 (GRN) GSTA1	false
82659	GRN	ARID2 (GRN) SOX2	false
82660	GRN	ARID2 (GRN) C1orf192	false
82661	GRN	RFX5 (GRN) ALDH3A1	false
82662	GRN	RFX5 (GRN) IQCG	false
82663	GRN	RFX5 (GRN) KIAA0319	false
82664	GRN	RFX5 (GRN) TP63	false
82665	GRN	RFX5 (GRN) GSTA1	false
82666	GRN	RFX5 (GRN) SOX2	false
82667	GRN	RFX5 (GRN) C1orf192	false
82668	GRN	RFX5 (GRN) GPX2	false
82669	GRN	EOMES (GRN) AKAP14	false
82670	GRN	EOMES (GRN) TGM3	false
82671	GRN	RFX4 (GRN) ALDH3A1	false
82672	GRN	RFX4 (GRN) IQCG	false
82673	GRN	RFX4 (GRN) TP63	false
82674	GRN	RFX4 (GRN) SOX2	false
82675	GRN	RFX4 (GRN) C1orf192	false
82676	GRN	RFX3 (GRN) ALDH3A1	false
82677	GRN	RFX3 (GRN) AKAP14	false
82678	GRN	RFX3 (GRN) IQCG	false
82679	GRN	RFX3 (GRN) KIAA0319	false
82680	GRN	RFX3 (GRN) TP63	false
82681	GRN	RFX3 (GRN) GSTA1	false
82682	GRN	RFX3 (GRN) TGM3	false
82683	GRN	RFX3 (GRN) SOX2	false
82684	GRN	RFX3 (GRN) C1orf192	false
82685	GRN	RFX3 (GRN) GPX2	false
82686	GCN	SFTPA2 (GCN) C11orf53	false
82687	GRN	RFX2 (GRN) ALDH3A1	false
82688	GRN	RFX2 (GRN) C11orf53	false
82689	GRN	RFX2 (GRN) IQCG	false
82690	GRN	RFX2 (GRN) KIAA0319	false
82691	GRN	RFX2 (GRN) TP63	false
82692	GRN	RFX2 (GRN) SFTPA2	false
82693	GRN	RFX2 (GRN) GSTA1	false
82694	GRN	RFX2 (GRN) SOX2	false
82695	GRN	RFX2 (GRN) C1orf192	false
82696	GRN	RFX2 (GRN) GPX2	false
82697	GCN	TGM3 (GCN) AKAP14	false
82698	GRN	RFX1 (GRN) AKAP14	false
82699	GRN	RFX1 (GRN) TGM3	false
82700	GRN	ETV1 (GRN) NKX2-1	false
82701	GRN	ETV1 (GRN) POP5	false
82702	GRN	ETV1 (GRN) LPCAT1	false
82703	GRN	ETV1 (GRN) LIMS2	false
82704	GRN	ELF3 (GRN) NKX2-1	false
82705	GRN	ELF3 (GRN) ZNF320	false
82706	GRN	ELF3 (GRN) FGA	false
82707	GRN	ELF3 (GRN) ALDH3B1	false
82708	GRN	ELF3 (GRN) SFTPB	false
82709	GRN	ELF3 (GRN) CORO1A	false
82710	GRN	ELF3 (GRN) LPCAT1	false
82711	GRN	ELF3 (GRN) C2orf44	false
82712	GRN	ELF3 (GRN) MYO1F	false
82713	GRN	ELF3 (GRN) SFTA2	false
82714	GRN	ELF3 (GRN) CD97	false
82715	GRN	ELF3 (GRN) NLRP9	false
82716	GRN	ELF3 (GRN) SFTPD	false
82717	GRN	EHF (GRN) EIF4G1	false
82718	GRN	EHF (GRN) TMEM79	false
82719	GRN	EHF (GRN) NKX2-1	false
82720	GRN	EHF (GRN) CAPN8	false
82721	GRN	EHF (GRN) SFTPB	false
82722	GRN	EHF (GRN) SFTA2	false
82723	GRN	EHF (GRN) ZNF320	false
82724	GRN	EHF (GRN) NABP2	false
82725	GRN	EHF (GRN) LPCAT1	false
82726	GRN	EHF (GRN) SLC22A31	false
82727	GRN	EHF (GRN) NLRP9	false
82728	GRN	EHF (GRN) SFTPD	false
82729	GRN	TFEB (GRN) FAM103A1	false
82730	GRN	TFEB (GRN) POLR3K	false
82731	GRN	TFEB (GRN) DSCC1	false
82732	GRN	TFEB (GRN) MTFMT	false
82733	GRN	TFEB (GRN) GALNT10	false
82734	GRN	TFEB (GRN) MVP	false
82735	GRN	TFEB (GRN) C15orf40	false
82736	GRN	TFEB (GRN) KNSTRN	false
82737	GRN	TFEB (GRN) COX5A	false
82738	GRN	TFEB (GRN) OIP5	false
82739	GCN	KCNQ3 (GCN) NECAB1	false
82740	GRN	ELF5 (GRN) NKX2-1	false
82741	GRN	ELF5 (GRN) NECAB1	false
82742	GRN	ELF5 (GRN) SFTA2	false
82743	GRN	ELF5 (GRN) LPCAT1	false
82744	GRN	ELF5 (GRN) KCNQ3	false
82745	GRN	ELF5 (GRN) SFTPD	false
82746	GRN	USF2 (GRN) FAM103A1	false
82747	GRN	USF2 (GRN) C1QBP	false
82748	GRN	USF2 (GRN) POLR3K	false
82749	GRN	USF2 (GRN) MTFMT	false
82750	GRN	USF2 (GRN) MRPL46	false
82751	GRN	USF2 (GRN) GALNT10	false
82752	GRN	USF2 (GRN) NKX2-1	false
82753	GRN	USF2 (GRN) MBIP	false
82754	GRN	USF2 (GRN) CAPN8	false
82755	GRN	USF2 (GRN) MVP	false
82756	GRN	USF2 (GRN) C15orf40	false
82757	GRN	USF2 (GRN) KNSTRN	false
82758	GRN	USF2 (GRN) LPCAT1	false
82759	GRN	USF2 (GRN) DTD2	false
82760	GRN	USF2 (GRN) SLC22A31	false
82761	GRN	USF2 (GRN) OIP5	false
82762	GCN	RFC4 (GCN) MVP	false
82763	GRN	USF1 (GRN) FAM103A1	false
82764	GRN	USF1 (GRN) POLR3K	false
82765	GRN	USF1 (GRN) DSCC1	false
82766	GRN	USF1 (GRN) MTFMT	false
82767	GRN	USF1 (GRN) ACAT2	false
82768	GRN	USF1 (GRN) PSAT1	false
82769	GRN	USF1 (GRN) C1QBP	false
82770	GRN	USF1 (GRN) MRPL46	false
82771	GRN	USF1 (GRN) GALNT10	false
82772	GRN	USF1 (GRN) NKX2-1	false
82773	GRN	USF1 (GRN) GTF2A2	false
82774	GRN	USF1 (GRN) COQ3	false
82775	GRN	USF1 (GRN) SFTPB	false
82776	GRN	USF1 (GRN) MVP	false
82777	GRN	USF1 (GRN) TRAIP	false
82778	GRN	USF1 (GRN) C15orf40	false
82779	GRN	USF1 (GRN) KNSTRN	false
82780	GRN	USF1 (GRN) TRIM16L	false
82781	GRN	USF1 (GRN) LPCAT1	false
82782	GRN	USF1 (GRN) WNT5A	false
82783	GRN	USF1 (GRN) RAD51	false
82784	GRN	USF1 (GRN) RFC4	false
82785	GRN	USF1 (GRN) NLRP9	false
82786	GRN	USF1 (GRN) OIP5	false
82787	GRN	SREBF2 (GRN) HHIP	false
82788	GRN	SREBF2 (GRN) SFTA3	false
82789	GRN	MLX (GRN) NKX2-1	false
82790	GRN	MLX (GRN) HHIP	false
82791	GRN	MLX (GRN) LPCAT1	false
82792	GRN	MLX (GRN) SFTA3	false
82793	GRN	KLF5 (GRN) OIP5	false
82794	GRN	KLF5 (GRN) C15orf40	false
82795	GRN	ERF (GRN) CCDC69	false
82796	GRN	ERF (GRN) THEMIS2	false
82797	GRN	ERF (GRN) CD180	false
82798	GRN	ERF (GRN) TRIM16L	false
82799	GRN	ERF (GRN) HHIP	false
82800	GRN	ERF (GRN) TMEM100	false
82801	GRN	ERF (GRN) MRPL36	false
82802	GRN	ERF (GRN) SHE	false
82803	GRN	ERF (GRN) ZNF320	false
82804	GRN	ERF (GRN) NKX2-1	false
82805	GRN	ERF (GRN) TOR4A	false
82806	GRN	ERF (GRN) LPCAT1	false
82807	GRN	ERF (GRN) WNT5A	false
82808	GRN	ERF (GRN) SFTA3	false
82809	GRN	ERF (GRN) CAPN8	false
82810	GRN	ERF (GRN) TRIP13	false
82811	GCN	RAE1 (GCN) GINS1	false
82812	GRN	ELK4 (GRN) FAM103A1	false
82813	GRN	ELK4 (GRN) CCDC69	false
82814	GRN	ELK4 (GRN) HCLS1	false
82815	GRN	ELK4 (GRN) POLR3K	false
82816	GRN	ELK4 (GRN) MND1	false
82817	GRN	ELK4 (GRN) GINS1	false
82818	GRN	ELK4 (GRN) DSCC1	false
82819	GRN	ELK4 (GRN) PTPLAD1	false
82820	GRN	ELK4 (GRN) CD180	false
82821	GRN	ELK4 (GRN) C1QBP	false
82822	GRN	ELK4 (GRN) MRPL46	false
82823	GRN	ELK4 (GRN) GALNT10	false
82824	GRN	ELK4 (GRN) C1orf162	false
82825	GRN	ELK4 (GRN) HHIP	false
82826	GRN	ELK4 (GRN) TMEM100	false
82827	GRN	ELK4 (GRN) MRPL36	false
82828	GRN	ELK4 (GRN) SFTPB	false
82829	GRN	ELK4 (GRN) NFAM1	false
82830	GRN	ELK4 (GRN) RPUSD2	false
82831	GRN	ELK4 (GRN) MVP	false
82832	GRN	ELK4 (GRN) ACVRL1	false
82833	GRN	ELK4 (GRN) POP5	false
82834	GRN	ELK4 (GRN) TRAIP	false
82835	GRN	ELK4 (GRN) SHE	false
82836	GRN	ELK4 (GRN) ARHGAP30	false
82837	GRN	ELK4 (GRN) AUNIP	false
82838	GRN	ELK4 (GRN) RAE1	false
82839	GRN	ELK4 (GRN) NKX2-1	false
82840	GRN	ELK4 (GRN) SLC39A8	false
82841	GRN	ELK4 (GRN) C15orf40	false
82842	GRN	ELK4 (GRN) TRIM16L	false
82843	GRN	ELK4 (GRN) LPCAT1	false
82844	GRN	ELK4 (GRN) INMT	false
82845	GRN	ELK4 (GRN) WNT5A	false
82846	GRN	ELK4 (GRN) SFTA3	false
82847	GRN	ELK4 (GRN) COX5A	false
82848	GRN	ELK4 (GRN) CAPN8	false
82849	GRN	ELK4 (GRN) TRIP13	false
82850	GRN	ELK4 (GRN) NLRP9	false
82851	GRN	ELK4 (GRN) VWF	false
82852	GRN	ELK4 (GRN) ADAL	false
82853	GRN	ELK4 (GRN) ZNF320	false
82854	GRN	ELK4 (GRN) OIP5	false
82855	GRN	ELK4 (GRN) TOR4A	false
82856	GRN	ELK4 (GRN) LIMS2	false
82857	GRN	DDIT3 (GRN) SFTPB	false
82858	GRN	DDIT3 (GRN) NLRP9	false
82859	GRN	ARNTL (GRN) MBIP	false
82860	GRN	ARNTL (GRN) CAPN8	false
82861	GRN	ARNTL (GRN) SFTPB	false
82862	GRN	ARNTL (GRN) DTD2	false
82863	GRN	ARNTL (GRN) SLC22A31	false
82864	GRN	ARNTL (GRN) NLRP9	false
82865	GCN	NABP2 (GCN) TMEM79	false
82866	GCN	C2orf44 (GCN) ZNF320	false
82867	GRN	PITX2 (GRN) MFNG	false
82868	GRN	PITX2 (GRN) DSCC1	false
82869	GRN	PITX2 (GRN) PSAT1	false
82870	GRN	PITX2 (GRN) VWA9	false
82871	GRN	PITX2 (GRN) TMEM79	false
82872	GRN	PITX2 (GRN) CD180	false
82873	GRN	PITX2 (GRN) ZNF320	false
82874	GRN	PITX2 (GRN) GTF2A2	false
82875	GRN	PITX2 (GRN) SPC25	false
82876	GRN	PITX2 (GRN) TIPIN	false
82877	GRN	PITX2 (GRN) ACVRL1	false
82878	GRN	PITX2 (GRN) POP5	false
82879	GRN	PITX2 (GRN) C15orf40	false
82880	GRN	PITX2 (GRN) RAD51	false
82881	GRN	PITX2 (GRN) NABP2	false
82882	GRN	PITX2 (GRN) C2orf44	false
82883	GRN	PITX2 (GRN) PSMA4	false
82884	GRN	PITX2 (GRN) KNSTRN	false
82885	GRN	PITX2 (GRN) OIP5	false
82886	GRN	PITX2 (GRN) ADAL	false
82887	GRN	PITX2 (GRN) TOR4A	false
82888	GRN	PITX2 (GRN) LIMS2	false
82889	GRN	TOPORS (GRN) MFNG	false
82890	GRN	TOPORS (GRN) FAM103A1	false
82891	GRN	TOPORS (GRN) POLR3K	false
82892	GRN	TOPORS (GRN) DSCC1	false
82893	GRN	TOPORS (GRN) VWA9	false
82894	GRN	TOPORS (GRN) GTF2A2	false
82895	GRN	TOPORS (GRN) NKX2-1	false
82896	GRN	TOPORS (GRN) C11orf82	false
82897	GRN	TOPORS (GRN) TOR4A	false
82898	GRN	TOPORS (GRN) C15orf40	false
82899	GRN	TOPORS (GRN) INMT	false
82900	GRN	TOPORS (GRN) CENPO	false
82901	GRN	TOPORS (GRN) OIP5	false
82902	GRN	TOPORS (GRN) ADAL	false
82903	GRN	SIX5 (GRN) MFNG	false
82904	GRN	SIX5 (GRN) CD180	false
82905	GRN	SIX5 (GRN) ACVRL1	false
82906	GRN	SIX5 (GRN) TOR4A	false
82907	GCN	PSMA4 (GCN) OIP5	false
82908	GRN	NR2F6 (GRN) FAM103A1	false
82909	GRN	NR2F6 (GRN) POLR3K	false
82910	GRN	NR2F6 (GRN) DSCC1	false
82911	GRN	NR2F6 (GRN) MRPL46	false
82912	GRN	NR2F6 (GRN) GTF2A2	false
82913	GRN	NR2F6 (GRN) C11orf82	false
82914	GRN	NR2F6 (GRN) C15orf40	false
82915	GRN	NR2F6 (GRN) COX5A	false
82916	GRN	NR2F6 (GRN) PSMA4	false
82917	GRN	NR2F6 (GRN) CENPO	false
82918	GRN	NR2F6 (GRN) OIP5	false
82919	GRN	NR2F6 (GRN) ADAL	false
82920	GCN	TRAIP (GCN) OIP5	false
82921	GCN	SKP2 (GCN) CDCA5	false
82922	GCN	C15orf40 (GCN) OIP5	false
82923	GCN	RAD51 (GCN) COQ3	false
82924	GCN	RAD51 (GCN) TROAP	false
82925	GCN	RAD51 (GCN) PSAT1	false
82926	GCN	YEATS4 (GCN) TROAP	false
82927	GCN	RNASEH2A (GCN) TROAP	false
82928	GCN	COX5A (GCN) RAD51	false
82929	GCN	COX5A (GCN) OIP5	false
82930	GCN	SPC25 (GCN) PRIM1	false
82931	GCN	PIK3R6 (GCN) SHE	false
82932	GCN	CDCA5 (GCN) TROAP	false
82933	GCN	CDCA5 (GCN) RAD51	false
82934	GCN	MVP (GCN) SPC25	false
82935	GCN	TMEM45B (GCN) TMEM79	false
82936	GCN	TROAP (GCN) GALNT10	false
82937	GCN	TROAP (GCN) SUV39H1	false
82938	GCN	TROAP (GCN) GINS1	false
82939	GCN	TROAP (GCN) GINS2	false
82940	GCN	TROAP (GCN) MVP	false
82941	GCN	RFC5 (GCN) SPC25	false
82942	GCN	RFC5 (GCN) TROAP	false
82943	GCN	FOXM1 (GCN) TROAP	false
82944	GCN	ADAL (GCN) OIP5	false
82945	GCN	TIMELESS (GCN) TROAP	false
82946	GCN	OIP5 (GCN) RFC4	false
82947	GCN	OIP5 (GCN) MTFMT	false
82948	GCN	OIP5 (GCN) ACAT2	false
82949	GCN	OIP5 (GCN) TIPIN	false
82950	GCN	OIP5 (GCN) MRPL46	false
82951	GCN	OIP5 (GCN) GTF2A2	false
82952	GCN	OIP5 (GCN) C11orf82	false
82953	GCN	OIP5 (GCN) FAM103A1	false
82954	GCN	OIP5 (GCN) C1QBP	false
82955	GCN	OIP5 (GCN) POLR3K	false
82956	GCN	OIP5 (GCN) RFC5	false
82957	GCN	OIP5 (GCN) DSCC1	false
82958	GCN	OIP5 (GCN) VWA9	false
82959	GCN	OIP5 (GCN) PTPLAD1	false
82960	GCN	OIP5 (GCN) LIN9	false
82961	GCN	OIP5 (GCN) GALNT10	false
82962	GCN	OIP5 (GCN) CDCA5	false
82963	GCN	OIP5 (GCN) TROAP	false
82964	GCN	OIP5 (GCN) RPUSD2	false
82965	GCN	OIP5 (GCN) MVP	false
82966	GRN	GABPA (GRN) MFNG	false
82967	GRN	GABPA (GRN) FAM103A1	false
82968	GRN	GABPA (GRN) CCDC69	false
82969	GRN	GABPA (GRN) HCLS1	false
82970	GRN	GABPA (GRN) POLR3K	false
82971	GRN	GABPA (GRN) MND1	false
82972	GRN	GABPA (GRN) DSCC1	false
82973	GRN	GABPA (GRN) THEMIS2	false
82974	GRN	GABPA (GRN) PSAT1	false
82975	GRN	GABPA (GRN) VWA9	false
82976	GRN	GABPA (GRN) PTPLAD1	false
82977	GRN	GABPA (GRN) CD180	false
82978	GRN	GABPA (GRN) SUV39H1	false
82979	GRN	GABPA (GRN) C1QBP	false
82980	GRN	GABPA (GRN) LIN9	false
82981	GRN	GABPA (GRN) GALNT10	false
82982	GRN	GABPA (GRN) C1orf162	false
82983	GRN	GABPA (GRN) DPEP2	false
82984	GRN	GABPA (GRN) NKX2-1	false
82985	GRN	GABPA (GRN) HHIP	false
82986	GRN	GABPA (GRN) SLAMF8	false
82987	GRN	GABPA (GRN) GINS1	false
82988	GRN	GABPA (GRN) PRIM1	false
82989	GRN	GABPA (GRN) FGA	false
82990	GRN	GABPA (GRN) GINS2	false
82991	GRN	GABPA (GRN) TMEM79	false
82992	GRN	GABPA (GRN) CAPN8	false
82993	GRN	GABPA (GRN) SFTPB	false
82994	GRN	GABPA (GRN) NFAM1	false
82995	GRN	GABPA (GRN) RPUSD2	false
82996	GRN	GABPA (GRN) ACVRL1	false
82997	GRN	GABPA (GRN) POP5	false
82998	GRN	GABPA (GRN) VCP	false
82999	GRN	GABPA (GRN) TRAIP	false
83000	GRN	GABPA (GRN) ARHGAP30	false
83001	GRN	GABPA (GRN) SKP2	false
83002	GRN	GABPA (GRN) AUNIP	false
83003	GRN	GABPA (GRN) ST3GAL5	false
83004	GRN	GABPA (GRN) SLC39A8	false
83005	GRN	GABPA (GRN) C15orf40	false
83006	GRN	GABPA (GRN) RAD51	false
83007	GRN	GABPA (GRN) TRIM16L	false
83008	GRN	GABPA (GRN) LPCAT1	false
83009	GRN	GABPA (GRN) YEATS4	false
83010	GRN	GABPA (GRN) RNASEH2A	false
83011	GRN	GABPA (GRN) TGFBR2	false
83012	GRN	GABPA (GRN) SHE	false
83013	GRN	GABPA (GRN) INMT	false
83014	GRN	GABPA (GRN) WNT5A	false
83015	GRN	GABPA (GRN) SFTA3	false
83016	GRN	GABPA (GRN) COX5A	false
83017	GRN	GABPA (GRN) SPC25	false
83018	GRN	GABPA (GRN) PIK3R6	false
83019	GRN	GABPA (GRN) SFTA2	false
83020	GRN	GABPA (GRN) MC4R	false
83021	GRN	GABPA (GRN) CDCA5	false
83022	GRN	GABPA (GRN) MVP	false
83023	GRN	GABPA (GRN) TMEM45B	false
83024	GRN	GABPA (GRN) TROAP	false
83025	GRN	GABPA (GRN) KNSTRN	false
83026	GRN	GABPA (GRN) SLC22A31	false
83027	GRN	GABPA (GRN) CENPO	false
83028	GRN	GABPA (GRN) RFC5	false
83029	GRN	GABPA (GRN) FOXM1	false
83030	GRN	GABPA (GRN) NLRP9	false
83031	GRN	GABPA (GRN) VWF	false
83032	GRN	GABPA (GRN) ADAL	false
83033	GRN	GABPA (GRN) ZNF320	false
83034	GRN	GABPA (GRN) TIMELESS	false
83035	GRN	GABPA (GRN) OIP5	false
83036	GRN	GABPA (GRN) TOR4A	false
83037	GRN	GABPA (GRN) LIMS2	false
83038	GCN	H2AFY2 (GCN) ZWINT	false
83039	GCN	SLC39A8 (GCN) SHE	false
83040	GCN	DTD2 (GCN) MBIP	false
83041	GCN	ST3GAL5 (GCN) RAD51	false
83042	GCN	ST3GAL5 (GCN) ARRB1	false
83043	GCN	SFTPD (GCN) SFTA2	false
83044	GRN	ETV6 (GRN) EIF4G1	false
83045	GRN	ETV6 (GRN) CCDC69	false
83046	GRN	ETV6 (GRN) HCLS1	false
83047	GRN	ETV6 (GRN) ZWINT	false
83048	GRN	ETV6 (GRN) CD180	false
83049	GRN	ETV6 (GRN) NKX2-1	false
83050	GRN	ETV6 (GRN) C1orf162	false
83051	GRN	ETV6 (GRN) HHIP	false
83052	GRN	ETV6 (GRN) MBIP	false
83053	GRN	ETV6 (GRN) ARRB1	false
83054	GRN	ETV6 (GRN) SFTPB	false
83055	GRN	ETV6 (GRN) ACVRL1	false
83056	GRN	ETV6 (GRN) POP5	false
83057	GRN	ETV6 (GRN) VCP	false
83058	GRN	ETV6 (GRN) SFTA2	false
83059	GRN	ETV6 (GRN) SHE	false
83060	GRN	ETV6 (GRN) ARHGAP30	false
83061	GRN	ETV6 (GRN) H2AFY2	false
83062	GRN	ETV6 (GRN) SLC39A8	false
83063	GRN	ETV6 (GRN) LPCAT1	false
83064	GRN	ETV6 (GRN) ZNF320	false
83065	GRN	ETV6 (GRN) SFTA3	false
83066	GRN	ETV6 (GRN) MC4R	false
83067	GRN	ETV6 (GRN) DTD2	false
83068	GRN	ETV6 (GRN) ST3GAL5	false
83069	GRN	ETV6 (GRN) NLRP9	false
83070	GRN	ETV6 (GRN) TOR4A	false
83071	GRN	ETV6 (GRN) LIMS2	false
83072	GRN	ETV6 (GRN) SFTPD	false
83073	GCN	NKX2-1 (GCN) KIAA0408	false
83074	GCN	NKX2-1 (GCN) TMEM100	false
83075	GCN	SFTA2 (GCN) FGA	false
83076	GRN	ETV3 (GRN) CCDC69	false
83077	GRN	ETV3 (GRN) HCLS1	false
83078	GRN	ETV3 (GRN) THEMIS2	false
83079	GRN	ETV3 (GRN) C1orf162	false
83080	GRN	ETV3 (GRN) FGA	false
83081	GRN	ETV3 (GRN) TMEM100	false
83082	GRN	ETV3 (GRN) MRPL36	false
83083	GRN	ETV3 (GRN) SHE	false
83084	GRN	ETV3 (GRN) ARHGAP30	false
83085	GRN	ETV3 (GRN) NKX2-1	false
83086	GRN	ETV3 (GRN) LPCAT1	false
83087	GRN	ETV3 (GRN) ZNF320	false
83088	GRN	ETV3 (GRN) INMT	false
83089	GRN	ETV3 (GRN) SFTA2	false
83090	GRN	ETV3 (GRN) CAPN8	false
83091	GRN	ETV3 (GRN) TRIP13	false
83092	GCN	KNSTRN (GCN) SPC25	false
83093	GCN	KNSTRN (GCN) TROAP	false
83094	GCN	KNSTRN (GCN) MVP	false
83095	GCN	TRIM16L (GCN) C1QBP	false
83096	GCN	WNT5A (GCN) TRIM16L	false
83097	GCN	MC4R (GCN) SFTPB	false
83098	GRN	ELF4 (GRN) EIF4G1	false
83099	GRN	ELF4 (GRN) MVP	false
83100	GRN	ELF4 (GRN) C1QBP	false
83101	GRN	ELF4 (GRN) NKX2-1	false
83102	GRN	ELF4 (GRN) C1orf162	false
83103	GRN	ELF4 (GRN) MRPL36	false
83104	GRN	ELF4 (GRN) CAPN8	false
83105	GRN	ELF4 (GRN) SFTPB	false
83106	GRN	ELF4 (GRN) KNSTRN	false
83107	GRN	ELF4 (GRN) TRIM16L	false
83108	GRN	ELF4 (GRN) LPCAT1	false
83109	GRN	ELF4 (GRN) ZNF320	false
83110	GRN	ELF4 (GRN) WNT5A	false
83111	GRN	ELF4 (GRN) MC4R	false
83112	GRN	ELF4 (GRN) TRIP13	false
83113	GRN	ELF4 (GRN) SLC22A31	false
83114	GRN	ELF4 (GRN) NLRP9	false
83115	GCN	RHOBTB2 (GCN) SHE	false
83116	GCN	SLC22A31 (GCN) CAPN8	false
83117	GCN	NLRP9 (GCN) SFTPB	false
83118	GRN	BRCA1 (GRN) NKX2-1	false
83119	GRN	BRCA1 (GRN) SHE	false
83120	GRN	BRCA1 (GRN) CAPN8	false
83121	GRN	BRCA1 (GRN) SFTPB	false
83122	GRN	BRCA1 (GRN) POP5	false
83123	GRN	BRCA1 (GRN) LPCAT1	false
83124	GRN	BRCA1 (GRN) RHOBTB2	false
83125	GRN	BRCA1 (GRN) SLC22A31	false
83126	GRN	BRCA1 (GRN) NLRP9	false
83127	GRN	BRCA1 (GRN) LIMS2	false
83128	GCN	DNAJC19 (GCN) ABCC5	false
83129	GCN	CENPO (GCN) TROAP	false
83130	GCN	CENPO (GCN) SPC25	false
83131	GCN	CENPO (GCN) C11orf82	false
83132	GRN	SMARCC2 (GRN) ABCC5	false
83133	GRN	SMARCC2 (GRN) MFNG	false
83134	GRN	SMARCC2 (GRN) HCLS1	false
83135	GRN	SMARCC2 (GRN) CD180	false
83136	GRN	SMARCC2 (GRN) SLAMF8	false
83137	GRN	SMARCC2 (GRN) C11orf82	false
83138	GRN	SMARCC2 (GRN) ACVRL1	false
83139	GRN	SMARCC2 (GRN) DNAJC19	false
83140	GRN	SMARCC2 (GRN) ARHGAP30	false
83141	GRN	SMARCC2 (GRN) CENPO	false
83142	GRN	SMARCC2 (GRN) TOR4A	false
83143	GCN	ZNF320 (GCN) NFAM1	false
83144	GCN	ZNF320 (GCN) THEMIS2	false
83145	GCN	ZNF320 (GCN) C1orf162	false
83146	GCN	ZNF320 (GCN) EIF4G1	false
83147	GRN	ELF1 (GRN) EIF4G1	false
83148	GRN	ELF1 (GRN) NKX2-1	false
83149	GRN	ELF1 (GRN) ZNF320	false
83150	GRN	ELF1 (GRN) LPCAT1	false
83151	GCN	LPCAT1 (GCN) NKX2-1	false
83152	GCN	INMT (GCN) NKX2-1	false
83153	GCN	LIMS2 (GCN) VCP	false
83154	GCN	LIMS2 (GCN) POP5	false
83155	GRN	ETV4 (GRN) NKX2-1	false
83156	GRN	ETV4 (GRN) MRPL36	false
83157	GRN	ETV4 (GRN) POP5	false
83158	GRN	ETV4 (GRN) LPCAT1	false
83159	GRN	ETV4 (GRN) INMT	false
83160	GRN	ETV4 (GRN) TRIP13	false
83161	GRN	ETV4 (GRN) LIMS2	false
83162	GCN	CORO1A (GCN) ALDH3B1	false
83163	GCN	MCM5 (GCN) CDC45	false
83164	GCN	ARHGAP30 (GCN) HCLS1	false
83165	GCN	POLDIP2 (GCN) ABCC5	false
83166	GCN	AUNIP (GCN) MND1	false
83167	GCN	UNC13D (GCN) CDC45	false
83168	GCN	PSMC5 (GCN) ABCC5	false
83169	GCN	TRIP13 (GCN) MRPL36	false
83170	GCN	TRIP13 (GCN) NDUFS6	false
83171	GCN	SMARCB1 (GCN) CDC45	false
83172	GCN	MYO1F (GCN) ALDH3B1	false
83173	GCN	SHE (GCN) CCDC69	false
83174	GCN	SHE (GCN) DPEP2	false
83175	GCN	SFTA3 (GCN) HHIP	false
83176	GCN	TGFBR2 (GCN) TROAP	false
83177	GCN	TGFBR2 (GCN) ALDH3B1	false
83178	GCN	CAPN8 (GCN) TMEM100	false
83179	GCN	CD97 (GCN) CDC45	false
83180	GCN	CD97 (GCN) ALDH3B1	false
83181	GCN	CDC45 (GCN) TNS3	false
83182	GCN	CDC45 (GCN) STEAP4	false
83183	GCN	CDC45 (GCN) CPM	false
83184	GCN	CDC45 (GCN) PCNA	false
83185	GCN	CDC45 (GCN) DRG1	false
83186	GCN	CDC45 (GCN) TOMM22	false
83187	GCN	CDC45 (GCN) ASAH1	false
83188	GCN	CDC45 (GCN) GALNT10	false
83189	GCN	CDC45 (GCN) PES1	false
83190	GCN	CDC45 (GCN) ST3GAL5	false
83191	GCN	CDC45 (GCN) SNRPD3	false
83192	GCN	CDC45 (GCN) ZNF74	false
83193	GCN	ITGB2 (GCN) ALDH3B1	false
83194	GCN	VWF (GCN) SHE	false
83195	GCN	CCR1 (GCN) ALDH3B1	false
83196	GCN	ALDH3B1 (GCN) ARHGDIB	false
83197	GCN	ALDH3B1 (GCN) SIGLEC9	false
83198	GCN	ALDH3B1 (GCN) FGR	false
83199	GCN	TOR4A (GCN) MFNG	false
83200	GCN	TOR4A (GCN) ALDH3B1	false
83201	GCN	TOR4A (GCN) CD180	false
83202	GCN	TOR4A (GCN) SLAMF8	false
83203	GCN	TOR4A (GCN) ACVRL1	false
83204	GCN	LRRC25 (GCN) ALDH3B1	false
83205	GRN	NRF1 (GRN) TNS3	false
83206	GRN	NRF1 (GRN) MFNG	false
83207	GRN	NRF1 (GRN) STEAP4	false
83208	GRN	NRF1 (GRN) CPM	false
83209	GRN	NRF1 (GRN) HCLS1	false
83210	GRN	NRF1 (GRN) PCNA	false
83211	GRN	NRF1 (GRN) MND1	false
83212	GRN	NRF1 (GRN) DRG1	false
83213	GRN	NRF1 (GRN) CD180	false
83214	GRN	NRF1 (GRN) ABCC5	false
83215	GRN	NRF1 (GRN) TOMM22	false
83216	GRN	NRF1 (GRN) ASAH1	false
83217	GRN	NRF1 (GRN) GALNT10	false
83218	GRN	NRF1 (GRN) NDUFS6	false
83219	GRN	NRF1 (GRN) ARHGDIB	false
83220	GRN	NRF1 (GRN) DPEP2	false
83221	GRN	NRF1 (GRN) PES1	false
83222	GRN	NRF1 (GRN) HHIP	false
83223	GRN	NRF1 (GRN) SLAMF8	false
83224	GRN	NRF1 (GRN) ST3GAL5	false
83225	GRN	NRF1 (GRN) SNRPD3	false
83226	GRN	NRF1 (GRN) TMEM100	false
83227	GRN	NRF1 (GRN) ZNF74	false
83228	GRN	NRF1 (GRN) SIGLEC9	false
83229	GRN	NRF1 (GRN) FGR	false
83230	GRN	NRF1 (GRN) ACVRL1	false
83231	GRN	NRF1 (GRN) CORO1A	false
83232	GRN	NRF1 (GRN) MCM5	false
83233	GRN	NRF1 (GRN) ARHGAP30	false
83234	GRN	NRF1 (GRN) POLDIP2	false
83235	GRN	NRF1 (GRN) AUNIP	false
83236	GRN	NRF1 (GRN) UNC13D	false
83237	GRN	NRF1 (GRN) PSMC5	false
83238	GRN	NRF1 (GRN) TRIP13	false
83239	GRN	NRF1 (GRN) SMARCB1	false
83240	GRN	NRF1 (GRN) MYO1F	false
83241	GRN	NRF1 (GRN) SHE	false
83242	GRN	NRF1 (GRN) SFTA3	false
83243	GRN	NRF1 (GRN) TGFBR2	false
83244	GRN	NRF1 (GRN) CAPN8	false
83245	GRN	NRF1 (GRN) CD97	false
83246	GRN	NRF1 (GRN) CDC45	false
83247	GRN	NRF1 (GRN) ITGB2	false
83248	GRN	NRF1 (GRN) VWF	false
83249	GRN	NRF1 (GRN) CCR1	false
83250	GRN	NRF1 (GRN) ALDH3B1	false
83251	GRN	NRF1 (GRN) TOR4A	false
83252	GRN	NRF1 (GRN) LRRC25	false
83253	GCN	TP63 (GCN) ALDH3A1	false
83254	GCN	STK33 (GCN) ABCC5	false
83255	GCN	GSTA1 (GCN) TP63	false
83256	GCN	SOX2 (GCN) TP63	false
83257	GCN	C1orf192 (GCN) IQCG	false
83258	GCN	GPX2 (GCN) KIAA0319	false
83259	GCN	AKR1B10 (GCN) AKR1C1	false
83260	GCN	CYP4F11 (GCN) AKR1B10	false
83261	GRN	MXI1 (GRN) ALDH3A1	false
83262	GRN	MXI1 (GRN) ABCC5	false
83263	GRN	MXI1 (GRN) IQCG	false
83264	GRN	MXI1 (GRN) KIAA0319	false
83265	GRN	MXI1 (GRN) AKR1C1	false
83266	GRN	MXI1 (GRN) TP63	false
83267	GRN	MXI1 (GRN) STK33	false
83268	GRN	MXI1 (GRN) GSTA1	false
83269	GRN	MXI1 (GRN) SOX2	false
83270	GRN	MXI1 (GRN) C1orf192	false
83271	GRN	MXI1 (GRN) GPX2	false
83272	GRN	MXI1 (GRN) AKR1B10	false
83273	GRN	MXI1 (GRN) CYP4F11	false
