# Supplementary material
Source: publisher figshare collection journal article supplement (https://springernature.figshare.com/ndownloader/files/35041376)
Supplement: Supplementary file 1 [file 35041376 › CytoscapeSession-2021_06_28-02_05/tables/82224-lung_GRN4TCGA_LUSC.txt_2/LOCAL_ATTRS-org.cytoscape.model.CyNetwork-lung_GRN4TCGA_LUSC.txt_2+default+network.cytable]

"CyCSV-Version","1"
"SUID","__Annotations","name","selected"
"java.lang.Long","java.util.List<java.lang.String>","java.lang.String","java.lang.Boolean"
"","mutable","",""
"lung_GRN4TCGA_LUSC.txt_2 default network",""
"82224","","lung_GRN4TCGA_LUSC.txt_2","true"
