# Supplementary material
Source: publisher figshare collection journal article supplement (https://springernature.figshare.com/ndownloader/files/35041376)
Supplement: Supplementary file 1 [file 35041376 › CytoscapeSession-2021_06_28-02_05/tables/82224-lung_GRN4TCGA_LUSC.txt_2/LOCAL_ATTRS-org.cytoscape.model.CyNode-lung_GRN4TCGA_LUSC.txt_2+default+node.cytable]

CyCSV-Version	1
SUID	DEG	name	selected	Type	UP/DOWN in LUAD
java.lang.Long	java.lang.Integer	java.lang.String	java.lang.Boolean	java.lang.String	java.lang.Integer
	mutable			mutable	mutable
lung_GRN4TCGA_LUSC.txt_2 default node
82234	1	KIAA0408	false	GCN_NODE	-1
82235	1	CYP4F2	false	GCN_NODE	1
82236	1	HOXB1	false	GCN_NODE	1
82237	1	TSPY6P	false	GCN_NODE	1
82238	1	C11orf53	false	GCN_NODE	1
82239	1	AKAP14	false	GCN_NODE	-1
82240	1	NECAB1	false	GCN_NODE	-1
82241	1	MTFMT	false	GCN_NODE	1
82242	1	ACAT2	false	GCN_NODE	1
82243	1	COQ3	false	GCN_NODE	1
82244	1	TIPIN	false	GCN_NODE	1
82245	1	MRPL46	false	GCN_NODE	1
82246	1	GTF2A2	false	GCN_NODE	1
82247	1	FAM103A1	false	GCN_NODE	1
82248	1	POLR3K	false	GCN_NODE	1
82249	1	DSCC1	false	GCN_NODE	1
82250	1	PSAT1	false	GCN_NODE	1
82251	1	VWA9	false	GCN_NODE	1
82252	1	PTPLAD1	false	GCN_NODE	1
82253	1	SUV39H1	false	GCN_NODE	1
82254	1	LIN9	false	GCN_NODE	1
82255	1	GINS1	false	GCN_NODE	1
82256	1	PRIM1	false	GCN_NODE	1
82257	1	GINS2	false	GCN_NODE	1
82258	1	TMEM79	false	GCN_NODE	1
82259	1	NFAM1	false	GCN_NODE	-1
82260	1	RPUSD2	false	GCN_NODE	1
82261	1	ZWINT	false	GCN_NODE	1
82262	1	MBIP	false	GCN_NODE	-1
82263	1	ARRB1	false	GCN_NODE	-1
82264	1	VCP	false	GCN_NODE	1
82265	1	CCDC69	false	GCN_NODE	-1
82266	1	THEMIS2	false	GCN_NODE	-1
82267	1	FGA	false	GCN_NODE	-1
82268	1	C1QBP	false	GCN_NODE	1
82269	1	C1orf162	false	GCN_NODE	-1
82270	1	SFTPB	false	GCN_NODE	-1
82271	1	C11orf82	false	GCN_NODE	1
82272	1	EIF4G1	false	GCN_NODE	1
82273	1	MRPL36	false	GCN_NODE	1
82274	1	POP5	false	GCN_NODE	1
82275	1	TNS3	false	GCN_NODE	-1
82276	1	MFNG	false	GCN_NODE	-1
82277	1	STEAP4	false	GCN_NODE	-1
82278	1	CPM	false	GCN_NODE	-1
82279	1	HCLS1	false	GCN_NODE	-1
82280	1	PCNA	false	GCN_NODE	1
82281	1	MND1	false	GCN_NODE	1
82282	1	DRG1	false	GCN_NODE	1
82283	1	CD180	false	GCN_NODE	1
82284	1	TOMM22	false	GCN_NODE	1
82285	1	ASAH1	false	GCN_NODE	-1
82286	1	GALNT10	false	GCN_NODE	-1
82287	1	NDUFS6	false	GCN_NODE	1
82288	1	ARHGDIB	false	GCN_NODE	-1
82289	1	DPEP2	false	GCN_NODE	-1
82290	1	PES1	false	GCN_NODE	1
82291	1	HHIP	false	GCN_NODE	-1
82292	1	SLAMF8	false	GCN_NODE	1
82293	1	SNRPD3	false	GCN_NODE	1
82294	1	TMEM100	false	GCN_NODE	-1
82295	1	ZNF74	false	GCN_NODE	1
82296	1	SIGLEC9	false	GCN_NODE	-1
82297	1	FGR	false	GCN_NODE	-1
82298	1	ACVRL1	false	GCN_NODE	-1
82299	1	ALDH3A1	false	GCN_NODE	1
82300	1	ABCC5	false	GCN_NODE	1
82301	1	IQCG	false	GCN_NODE	1
82302	1	KIAA0319	false	GCN_NODE	1
82303	1	AKR1C1	false	GCN_NODE	1
82304	1	ETV2	false	TF	1
82305	1	GLIS1	false	TF	1
82306	0	PROX1	false	TF	0
82307	1	ZNF202	false	TF	1
82308	1	ZBTB4	false	TF	-1
82309	1	ASCL1	false	TF	1
82310	1	ZIC1	false	TF	1
82311	1	HIC2	false	TF	1
82312	1	MLXIPL	false	TF	-1
82313	0	BHLHE41	false	TF	0
82314	1	ATOH8	false	TF	-1
82315	1	TP53	false	TF	1
82316	1	FOXK1	false	TF	1
82317	1	ZHX1	false	TF	1
82318	1	ZBTB7A	false	TF	-1
82319	1	NFIX	false	TF	-1
82320	1	HIF1A	false	TF	1
82321	1	GMEB2	false	TF	1
82322	0	ESRRA	false	TF	0
82323	0	HAND2	false	TF	0
82324	1	ARNT2	false	TF	1
82325	1	ENO1	false	TF	1
82326	1	ZIC4	false	TF	1
82327	1	SREBF1	false	TF	1
82328	1	SMAD2	false	TF	1
82329	1	NR5A2	false	TF	-1
82330	1	KLF1	false	TF	-1
82331	1	ID4	false	TF	-1
82332	1	RUNX3	false	TF	1
82333	1	ELK1	false	TF	1
82334	1	EGR2	false	TF	1
82335	1	GLIS2	false	TF	-1
82336	1	TP73	false	TF	1
82337	1	RBPJ	false	TF	-1
82338	1	KLF8	false	TF	-1
82339	1	KLF3	false	TF	1
82340	1	GLIS3	false	TF	-1
82341	1	HIVEP2	false	TF	-1
82342	1	KLF4	false	TF	-1
82343	1	MZF1	false	TF	-1
82344	1	REST	false	TF	1
82345	1	ZBTB7C	false	TF	1
82346	1	MYOD1	false	TF	1
82347	1	CTCF	false	TF	1
82348	0	CLOCK	false	TF	0
82349	1	SCRT1	false	TF	-1
82350	1	TFCP2L1	false	TF	-1
82351	1	PAX1	false	TF	1
82352	1	E2F1	false	TF	1
82353	1	ZBED1	false	TF	1
82354	1	MYBL1	false	TF	-1
82355	1	GSC2	false	TF	1
82356	0	BHLHE40	false	TF	0
82357	1	TFAP2B	false	TF	1
82358	1	LMO2	false	TF	-1
82359	0	HSF1	false	TF	0
82360	1	NR0B1	false	TF	1
82361	1	YBX1	false	TF	1
82362	1	AR	false	TF	-1
82363	1	ARNT	false	TF	-1
82364	1	TFAP2C	false	TF	1
82365	1	TFAP2A	false	TF	1
82366	1	NFYC	false	TF	1
82367	1	MYPOP	false	TF	1
82368	1	EP300	false	TF	1
82369	1	EGR4	false	TF	1
82370	1	NR2F2	false	TF	-1
82371	1	CDH12	false	GCN_NODE	1
82372	1	UCP1	false	GCN_NODE	1
82373	1	TSPY8	false	GCN_NODE	1
82374	1	JUN	false	TF	-1
82375	0	CFB	false	GCN_NODE	0
82376	1	ZBTB33	false	TF	1
82377	0	ARID2	false	TF	0
82378	1	RFX5	false	TF	1
82379	1	EOMES	false	TF	-1
82380	1	RFX4	false	TF	1
82381	1	RFX3	false	TF	-1
82382	1	SFTPA2	false	GCN_NODE	-1
82383	1	RFX2	false	TF	-1
82384	1	TGM3	false	GCN_NODE	1
82385	1	RFX1	false	TF	-1
82386	1	ETV1	false	TF	-1
82387	1	ELF3	false	TF	1
82388	1	EHF	false	TF	1
82389	1	TFEB	false	TF	-1
82390	1	KCNQ3	false	GCN_NODE	-1
82391	0	ELF5	false	TF	0
82392	0	USF2	false	TF	0
82393	1	RFC4	false	GCN_NODE	1
82394	1	USF1	false	TF	-1
82395	1	SREBF2	false	TF	1
82396	0	MLX	false	TF	0
82397	1	KLF5	false	TF	1
82398	0	ERF	false	TF	0
82399	1	RAE1	false	GCN_NODE	1
82400	1	ELK4	false	TF	-1
82401	1	DDIT3	false	TF	-1
82402	1	ARNTL	false	TF	-1
82403	1	NABP2	false	GCN_NODE	1
82404	1	C2orf44	false	GCN_NODE	1
82405	1	PITX2	false	TF	1
82406	1	TOPORS	false	TF	1
82407	1	SIX5	false	TF	-1
82408	1	PSMA4	false	GCN_NODE	1
82409	1	NR2F6	false	TF	1
82410	1	TRAIP	false	GCN_NODE	1
82411	1	SKP2	false	GCN_NODE	1
82412	1	C15orf40	false	GCN_NODE	1
82413	1	RAD51	false	GCN_NODE	1
82414	1	YEATS4	false	GCN_NODE	1
82415	1	RNASEH2A	false	GCN_NODE	1
82416	1	COX5A	false	GCN_NODE	1
82417	1	SPC25	false	GCN_NODE	1
82418	1	PIK3R6	false	GCN_NODE	-1
82419	1	CDCA5	false	GCN_NODE	1
82420	1	MVP	false	GCN_NODE	-1
82421	1	TMEM45B	false	GCN_NODE	1
82422	1	TROAP	false	GCN_NODE	1
82423	1	RFC5	false	GCN_NODE	1
82424	1	FOXM1	false	GCN_NODE	1
82425	1	ADAL	false	GCN_NODE	1
82426	1	TIMELESS	false	GCN_NODE	1
82427	1	OIP5	false	GCN_NODE	1
82428	0	GABPA	false	TF	0
82429	1	H2AFY2	false	GCN_NODE	1
82430	1	SLC39A8	false	GCN_NODE	-1
82431	1	DTD2	false	GCN_NODE	1
82432	1	ST3GAL5	false	GCN_NODE	-1
82433	1	SFTPD	false	GCN_NODE	-1
82434	0	ETV6	false	TF	0
82435	0	NKX2-1	false	GCN_NODE	0
82436	1	SFTA2	false	GCN_NODE	-1
82437	1	ETV3	false	TF	1
82438	1	KNSTRN	false	GCN_NODE	1
82439	1	TRIM16L	false	GCN_NODE	1
82440	1	WNT5A	false	GCN_NODE	1
82441	1	MC4R	false	GCN_NODE	1
82442	1	ELF4	false	TF	1
82443	1	RHOBTB2	false	GCN_NODE	-1
82444	1	SLC22A31	false	GCN_NODE	-1
82445	1	NLRP9	false	GCN_NODE	-1
82446	1	BRCA1	false	TF	1
82447	1	DNAJC19	false	GCN_NODE	1
82448	1	CENPO	false	GCN_NODE	1
82449	1	SMARCC2	false	TF	-1
82450	0	ZNF320	false	GCN_NODE	0
82451	1	ELF1	false	TF	-1
82452	1	LPCAT1	false	GCN_NODE	-1
82453	1	INMT	false	GCN_NODE	-1
82454	1	LIMS2	false	GCN_NODE	-1
82455	1	ETV4	false	TF	1
82456	1	CORO1A	false	GCN_NODE	-1
82457	1	MCM5	false	GCN_NODE	1
82458	1	ARHGAP30	false	GCN_NODE	-1
82459	1	POLDIP2	false	GCN_NODE	1
82460	1	AUNIP	false	GCN_NODE	1
82461	1	UNC13D	false	GCN_NODE	-1
82462	1	PSMC5	false	GCN_NODE	1
82463	1	TRIP13	false	GCN_NODE	1
82464	1	SMARCB1	false	GCN_NODE	1
82465	1	MYO1F	false	GCN_NODE	-1
82466	1	SHE	false	GCN_NODE	-1
82467	1	SFTA3	false	GCN_NODE	-1
82468	1	TGFBR2	false	GCN_NODE	-1
82469	1	CAPN8	false	GCN_NODE	-1
82470	1	CD97	false	GCN_NODE	-1
82471	1	CDC45	false	GCN_NODE	1
82472	1	ITGB2	false	GCN_NODE	-1
82473	1	VWF	false	GCN_NODE	-1
82474	1	CCR1	false	GCN_NODE	-1
82475	1	ALDH3B1	false	GCN_NODE	-1
82476	1	TOR4A	false	GCN_NODE	-1
82477	1	LRRC25	false	GCN_NODE	-1
82478	1	NRF1	false	TF	-1
82479	1	TP63	false	GCN_NODE	1
82480	1	STK33	false	GCN_NODE	-1
82481	1	GSTA1	false	GCN_NODE	1
82482	1	SOX2	false	GCN_NODE	1
82483	1	C1orf192	false	GCN_NODE	-1
82484	1	GPX2	false	GCN_NODE	1
82485	1	AKR1B10	false	GCN_NODE	1
82486	1	CYP4F11	false	GCN_NODE	1
82487	0	MXI1	false	TF	0
