# Supplementary material
Source: publisher figshare collection journal article supplement (https://springernature.figshare.com/ndownloader/files/35041376)
Supplement: Supplementary file 1 [file 35041376 › CytoscapeSession-2021_06_28-02_05/tables/cytables.xml]

<?xml version="1.0" encoding="UTF-8" standalone="yes"?>
<cyTables>
    <virtualColumns>
        <virtualColumn name="shared name" sourceColumn="shared name" sourceTable="35-lung_GRN4TCGA_normal.txt/SHARED_ATTRS-org.cytoscape.model.CyEdge-35+shared+edge.cytable" sourceJoinKey="SUID" targetTable="35-lung_GRN4TCGA_normal.txt/LOCAL_ATTRS-org.cytoscape.model.CyEdge-35+default+edge.cytable" targetJoinKey="SUID" immutable="false"/>
        <virtualColumn name="shared interaction" sourceColumn="shared interaction" sourceTable="35-lung_GRN4TCGA_normal.txt/SHARED_ATTRS-org.cytoscape.model.CyEdge-35+shared+edge.cytable" sourceJoinKey="SUID" targetTable="35-lung_GRN4TCGA_normal.txt/LOCAL_ATTRS-org.cytoscape.model.CyEdge-35+default+edge.cytable" targetJoinKey="SUID" immutable="false"/>
        <virtualColumn name="shared name" sourceColumn="shared name" sourceTable="82099-lung_GRN4TCGA_LUAD.txt_2/SHARED_ATTRS-org.cytoscape.model.CyNetwork-82099+shared+network.cytable" sourceJoinKey="SUID" targetTable="82115-82115/LOCAL_ATTRS-org.cytoscape.model.CyNetwork-82115+default+network.cytable" targetJoinKey="SUID" immutable="false"/>
        <virtualColumn name="shared name" sourceColumn="shared name" sourceTable="82198-lung_GRN4TCGA_LUSC.txt_2/SHARED_ATTRS-org.cytoscape.model.CyEdge-82198+shared+edge.cytable" sourceJoinKey="SUID" targetTable="82198-lung_GRN4TCGA_LUSC.txt_2/LOCAL_ATTRS-org.cytoscape.model.CyEdge-82198+default+edge.cytable" targetJoinKey="SUID" immutable="false"/>
        <virtualColumn name="shared interaction" sourceColumn="shared interaction" sourceTable="82198-lung_GRN4TCGA_LUSC.txt_2/SHARED_ATTRS-org.cytoscape.model.CyEdge-82198+shared+edge.cytable" sourceJoinKey="SUID" targetTable="82198-lung_GRN4TCGA_LUSC.txt_2/LOCAL_ATTRS-org.cytoscape.model.CyEdge-82198+default+edge.cytable" targetJoinKey="SUID" immutable="false"/>
        <virtualColumn name="ratio_sig" sourceColumn="ratio_sig" sourceTable="82198-lung_GRN4TCGA_LUSC.txt_2/SHARED_ATTRS-org.cytoscape.model.CyEdge-82198+shared+edge.cytable" sourceJoinKey="SUID" targetTable="82198-lung_GRN4TCGA_LUSC.txt_2/LOCAL_ATTRS-org.cytoscape.model.CyEdge-82198+default+edge.cytable" targetJoinKey="SUID" immutable="false"/>
        <virtualColumn name="shared name" sourceColumn="shared name" sourceTable="82099-lung_GRN4TCGA_LUAD.txt_2/SHARED_ATTRS-org.cytoscape.model.CyEdge-82099+shared+edge.cytable" sourceJoinKey="SUID" targetTable="82125-lung_GRN4TCGA_LUAD.txt_2/LOCAL_ATTRS-org.cytoscape.model.CyEdge-lung_GRN4TCGA_LUAD.txt_2+default+edge.cytable" targetJoinKey="SUID" immutable="false"/>
        <virtualColumn name="shared interaction" sourceColumn="shared interaction" sourceTable="82099-lung_GRN4TCGA_LUAD.txt_2/SHARED_ATTRS-org.cytoscape.model.CyEdge-82099+shared+edge.cytable" sourceJoinKey="SUID" targetTable="82125-lung_GRN4TCGA_LUAD.txt_2/LOCAL_ATTRS-org.cytoscape.model.CyEdge-lung_GRN4TCGA_LUAD.txt_2+default+edge.cytable" targetJoinKey="SUID" immutable="false"/>
        <virtualColumn name="Ratio_sig" sourceColumn="Ratio_sig" sourceTable="82099-lung_GRN4TCGA_LUAD.txt_2/SHARED_ATTRS-org.cytoscape.model.CyEdge-82099+shared+edge.cytable" sourceJoinKey="SUID" targetTable="82125-lung_GRN4TCGA_LUAD.txt_2/LOCAL_ATTRS-org.cytoscape.model.CyEdge-lung_GRN4TCGA_LUAD.txt_2+default+edge.cytable" targetJoinKey="SUID" immutable="false"/>
        <virtualColumn name="shared name" sourceColumn="shared name" sourceTable="35-lung_GRN4TCGA_normal.txt/SHARED_ATTRS-org.cytoscape.model.CyNode-35+shared+node.cytable" sourceJoinKey="SUID" targetTable="61-lung_GRN4TCGA_normal.txt/LOCAL_ATTRS-org.cytoscape.model.CyNode-lung_GRN4TCGA_normal.txt+default+node.cytable" targetJoinKey="SUID" immutable="false"/>
        <virtualColumn name="shared name" sourceColumn="shared name" sourceTable="66396-lung_GRN4GTEx_normal.txt/SHARED_ATTRS-org.cytoscape.model.CyEdge-66396+shared+edge.cytable" sourceJoinKey="SUID" targetTable="66396-lung_GRN4GTEx_normal.txt/LOCAL_ATTRS-org.cytoscape.model.CyEdge-66396+default+edge.cytable" targetJoinKey="SUID" immutable="false"/>
        <virtualColumn name="shared interaction" sourceColumn="shared interaction" sourceTable="66396-lung_GRN4GTEx_normal.txt/SHARED_ATTRS-org.cytoscape.model.CyEdge-66396+shared+edge.cytable" sourceJoinKey="SUID" targetTable="66396-lung_GRN4GTEx_normal.txt/LOCAL_ATTRS-org.cytoscape.model.CyEdge-66396+default+edge.cytable" targetJoinKey="SUID" immutable="false"/>
        <virtualColumn name="shared name" sourceColumn="shared name" sourceTable="77-77/SHARED_ATTRS-org.cytoscape.model.CyNetwork-77+shared+network.cytable" sourceJoinKey="SUID" targetTable="77-77/LOCAL_ATTRS-org.cytoscape.model.CyNetwork-77+default+network.cytable" targetJoinKey="SUID" immutable="false"/>
        <virtualColumn name="shared name" sourceColumn="shared name" sourceTable="66396-lung_GRN4GTEx_normal.txt/SHARED_ATTRS-org.cytoscape.model.CyEdge-66396+shared+edge.cytable" sourceJoinKey="SUID" targetTable="66412-66412/LOCAL_ATTRS-org.cytoscape.model.CyEdge-66412+default+edge.cytable" targetJoinKey="SUID" immutable="false"/>
        <virtualColumn name="shared interaction" sourceColumn="shared interaction" sourceTable="66396-lung_GRN4GTEx_normal.txt/SHARED_ATTRS-org.cytoscape.model.CyEdge-66396+shared+edge.cytable" sourceJoinKey="SUID" targetTable="66412-66412/LOCAL_ATTRS-org.cytoscape.model.CyEdge-66412+default+edge.cytable" targetJoinKey="SUID" immutable="false"/>
        <virtualColumn name="shared name" sourceColumn="shared name" sourceTable="82198-lung_GRN4TCGA_LUSC.txt_2/SHARED_ATTRS-org.cytoscape.model.CyEdge-82198+shared+edge.cytable" sourceJoinKey="SUID" targetTable="82214-82214/LOCAL_ATTRS-org.cytoscape.model.CyEdge-82214+default+edge.cytable" targetJoinKey="SUID" immutable="false"/>
        <virtualColumn name="shared interaction" sourceColumn="shared interaction" sourceTable="82198-lung_GRN4TCGA_LUSC.txt_2/SHARED_ATTRS-org.cytoscape.model.CyEdge-82198+shared+edge.cytable" sourceJoinKey="SUID" targetTable="82214-82214/LOCAL_ATTRS-org.cytoscape.model.CyEdge-82214+default+edge.cytable" targetJoinKey="SUID" immutable="false"/>
        <virtualColumn name="ratio_sig" sourceColumn="ratio_sig" sourceTable="82198-lung_GRN4TCGA_LUSC.txt_2/SHARED_ATTRS-org.cytoscape.model.CyEdge-82198+shared+edge.cytable" sourceJoinKey="SUID" targetTable="82214-82214/LOCAL_ATTRS-org.cytoscape.model.CyEdge-82214+default+edge.cytable" targetJoinKey="SUID" immutable="false"/>
        <virtualColumn name="shared name" sourceColumn="shared name" sourceTable="82099-lung_GRN4TCGA_LUAD.txt_2/SHARED_ATTRS-org.cytoscape.model.CyNetwork-82099+shared+network.cytable" sourceJoinKey="SUID" targetTable="82125-lung_GRN4TCGA_LUAD.txt_2/LOCAL_ATTRS-org.cytoscape.model.CyNetwork-lung_GRN4TCGA_LUAD.txt_2+default+network.cytable" targetJoinKey="SUID" immutable="false"/>
        <virtualColumn name="shared name" sourceColumn="shared name" sourceTable="35-lung_GRN4TCGA_normal.txt/SHARED_ATTRS-org.cytoscape.model.CyEdge-35+shared+edge.cytable" sourceJoinKey="SUID" targetTable="61-lung_GRN4TCGA_normal.txt/LOCAL_ATTRS-org.cytoscape.model.CyEdge-lung_GRN4TCGA_normal.txt+default+edge.cytable" targetJoinKey="SUID" immutable="false"/>
        <virtualColumn name="shared interaction" sourceColumn="shared interaction" sourceTable="35-lung_GRN4TCGA_normal.txt/SHARED_ATTRS-org.cytoscape.model.CyEdge-35+shared+edge.cytable" sourceJoinKey="SUID" targetTable="61-lung_GRN4TCGA_normal.txt/LOCAL_ATTRS-org.cytoscape.model.CyEdge-lung_GRN4TCGA_normal.txt+default+edge.cytable" targetJoinKey="SUID" immutable="false"/>
        <virtualColumn name="shared name" sourceColumn="shared name" sourceTable="66396-lung_GRN4GTEx_normal.txt/SHARED_ATTRS-org.cytoscape.model.CyNetwork-66396+shared+network.cytable" sourceJoinKey="SUID" targetTable="66412-66412/LOCAL_ATTRS-org.cytoscape.model.CyNetwork-66412+default+network.cytable" targetJoinKey="SUID" immutable="false"/>
        <virtualColumn name="shared name" sourceColumn="shared name" sourceTable="82198-lung_GRN4TCGA_LUSC.txt_2/SHARED_ATTRS-org.cytoscape.model.CyNetwork-82198+shared+network.cytable" sourceJoinKey="SUID" targetTable="82214-82214/LOCAL_ATTRS-org.cytoscape.model.CyNetwork-82214+default+network.cytable" targetJoinKey="SUID" immutable="false"/>
        <virtualColumn name="shared name" sourceColumn="shared name" sourceTable="66396-lung_GRN4GTEx_normal.txt/SHARED_ATTRS-org.cytoscape.model.CyEdge-66396+shared+edge.cytable" sourceJoinKey="SUID" targetTable="66422-lung_GRN4GTEx_normal.txt/LOCAL_ATTRS-org.cytoscape.model.CyEdge-lung_GRN4GTEx_normal.txt+default+edge.cytable" targetJoinKey="SUID" immutable="false"/>
        <virtualColumn name="shared interaction" sourceColumn="shared interaction" sourceTable="66396-lung_GRN4GTEx_normal.txt/SHARED_ATTRS-org.cytoscape.model.CyEdge-66396+shared+edge.cytable" sourceJoinKey="SUID" targetTable="66422-lung_GRN4GTEx_normal.txt/LOCAL_ATTRS-org.cytoscape.model.CyEdge-lung_GRN4GTEx_normal.txt+default+edge.cytable" targetJoinKey="SUID" immutable="false"/>
        <virtualColumn name="shared name" sourceColumn="shared name" sourceTable="82099-lung_GRN4TCGA_LUAD.txt_2/SHARED_ATTRS-org.cytoscape.model.CyNode-82099+shared+node.cytable" sourceJoinKey="SUID" targetTable="82125-lung_GRN4TCGA_LUAD.txt_2/LOCAL_ATTRS-org.cytoscape.model.CyNode-lung_GRN4TCGA_LUAD.txt_2+default+node.cytable" targetJoinKey="SUID" immutable="false"/>
        <virtualColumn name="shared name" sourceColumn="shared name" sourceTable="35-lung_GRN4TCGA_normal.txt/SHARED_ATTRS-org.cytoscape.model.CyNode-35+shared+node.cytable" sourceJoinKey="SUID" targetTable="51-51/LOCAL_ATTRS-org.cytoscape.model.CyNode-51+default+node.cytable" targetJoinKey="SUID" immutable="false"/>
        <virtualColumn name="shared name" sourceColumn="shared name" sourceTable="82099-lung_GRN4TCGA_LUAD.txt_2/SHARED_ATTRS-org.cytoscape.model.CyEdge-82099+shared+edge.cytable" sourceJoinKey="SUID" targetTable="82115-82115/LOCAL_ATTRS-org.cytoscape.model.CyEdge-82115+default+edge.cytable" targetJoinKey="SUID" immutable="false"/>
        <virtualColumn name="shared interaction" sourceColumn="shared interaction" sourceTable="82099-lung_GRN4TCGA_LUAD.txt_2/SHARED_ATTRS-org.cytoscape.model.CyEdge-82099+shared+edge.cytable" sourceJoinKey="SUID" targetTable="82115-82115/LOCAL_ATTRS-org.cytoscape.model.CyEdge-82115+default+edge.cytable" targetJoinKey="SUID" immutable="false"/>
        <virtualColumn name="Ratio_sig" sourceColumn="Ratio_sig" sourceTable="82099-lung_GRN4TCGA_LUAD.txt_2/SHARED_ATTRS-org.cytoscape.model.CyEdge-82099+shared+edge.cytable" sourceJoinKey="SUID" targetTable="82115-82115/LOCAL_ATTRS-org.cytoscape.model.CyEdge-82115+default+edge.cytable" targetJoinKey="SUID" immutable="false"/>
        <virtualColumn name="shared name" sourceColumn="shared name" sourceTable="77-77/SHARED_ATTRS-org.cytoscape.model.CyNetwork-77+shared+network.cytable" sourceJoinKey="SUID" targetTable="93-93/LOCAL_ATTRS-org.cytoscape.model.CyNetwork-93+default+network.cytable" targetJoinKey="SUID" immutable="false"/>
        <virtualColumn name="shared name" sourceColumn="shared name" sourceTable="77-77/SHARED_ATTRS-org.cytoscape.model.CyNode-77+shared+node.cytable" sourceJoinKey="SUID" targetTable="77-77/LOCAL_ATTRS-org.cytoscape.model.CyNode-77+default+node.cytable" targetJoinKey="SUID" immutable="false"/>
        <virtualColumn name="shared name" sourceColumn="shared name" sourceTable="82198-lung_GRN4TCGA_LUSC.txt_2/SHARED_ATTRS-org.cytoscape.model.CyNetwork-82198+shared+network.cytable" sourceJoinKey="SUID" targetTable="82224-lung_GRN4TCGA_LUSC.txt_2/LOCAL_ATTRS-org.cytoscape.model.CyNetwork-lung_GRN4TCGA_LUSC.txt_2+default+network.cytable" targetJoinKey="SUID" immutable="false"/>
        <virtualColumn name="shared name" sourceColumn="shared name" sourceTable="35-lung_GRN4TCGA_normal.txt/SHARED_ATTRS-org.cytoscape.model.CyNetwork-35+shared+network.cytable" sourceJoinKey="SUID" targetTable="61-lung_GRN4TCGA_normal.txt/LOCAL_ATTRS-org.cytoscape.model.CyNetwork-lung_GRN4TCGA_normal.txt+default+network.cytable" targetJoinKey="SUID" immutable="false"/>
        <virtualColumn name="shared name" sourceColumn="shared name" sourceTable="82198-lung_GRN4TCGA_LUSC.txt_2/SHARED_ATTRS-org.cytoscape.model.CyNode-82198+shared+node.cytable" sourceJoinKey="SUID" targetTable="82198-lung_GRN4TCGA_LUSC.txt_2/LOCAL_ATTRS-org.cytoscape.model.CyNode-82198+default+node.cytable" targetJoinKey="SUID" immutable="false"/>
        <virtualColumn name="shared name" sourceColumn="shared name" sourceTable="77-77/SHARED_ATTRS-org.cytoscape.model.CyEdge-77+shared+edge.cytable" sourceJoinKey="SUID" targetTable="93-93/LOCAL_ATTRS-org.cytoscape.model.CyEdge-93+default+edge.cytable" targetJoinKey="SUID" immutable="false"/>
        <virtualColumn name="shared interaction" sourceColumn="shared interaction" sourceTable="77-77/SHARED_ATTRS-org.cytoscape.model.CyEdge-77+shared+edge.cytable" sourceJoinKey="SUID" targetTable="93-93/LOCAL_ATTRS-org.cytoscape.model.CyEdge-93+default+edge.cytable" targetJoinKey="SUID" immutable="false"/>
        <virtualColumn name="Similarity_Score" sourceColumn="Similarity_Score" sourceTable="77-77/SHARED_ATTRS-org.cytoscape.model.CyEdge-77+shared+edge.cytable" sourceJoinKey="SUID" targetTable="93-93/LOCAL_ATTRS-org.cytoscape.model.CyEdge-93+default+edge.cytable" targetJoinKey="SUID" immutable="false"/>
        <virtualColumn name="Cluster_Index" sourceColumn="Cluster_Index" sourceTable="77-77/SHARED_ATTRS-org.cytoscape.model.CyEdge-77+shared+edge.cytable" sourceJoinKey="SUID" targetTable="93-93/LOCAL_ATTRS-org.cytoscape.model.CyEdge-93+default+edge.cytable" targetJoinKey="SUID" immutable="false"/>
        <virtualColumn name="Cluster_Size" sourceColumn="Cluster_Size" sourceTable="77-77/SHARED_ATTRS-org.cytoscape.model.CyEdge-77+shared+edge.cytable" sourceJoinKey="SUID" targetTable="93-93/LOCAL_ATTRS-org.cytoscape.model.CyEdge-93+default+edge.cytable" targetJoinKey="SUID" immutable="false"/>
        <virtualColumn name="Samples" sourceColumn="Samples" sourceTable="77-77/SHARED_ATTRS-org.cytoscape.model.CyEdge-77+shared+edge.cytable" sourceJoinKey="SUID" targetTable="93-93/LOCAL_ATTRS-org.cytoscape.model.CyEdge-93+default+edge.cytable" targetJoinKey="SUID" immutable="false"/>
        <virtualColumn name="Test_Name" sourceColumn="Test_Name" sourceTable="77-77/SHARED_ATTRS-org.cytoscape.model.CyEdge-77+shared+edge.cytable" sourceJoinKey="SUID" targetTable="93-93/LOCAL_ATTRS-org.cytoscape.model.CyEdge-93+default+edge.cytable" targetJoinKey="SUID" immutable="false"/>
        <virtualColumn name="p_value" sourceColumn="p_value" sourceTable="77-77/SHARED_ATTRS-org.cytoscape.model.CyEdge-77+shared+edge.cytable" sourceJoinKey="SUID" targetTable="93-93/LOCAL_ATTRS-org.cytoscape.model.CyEdge-93+default+edge.cytable" targetJoinKey="SUID" immutable="false"/>
        <virtualColumn name="r_squared" sourceColumn="r_squared" sourceTable="77-77/SHARED_ATTRS-org.cytoscape.model.CyEdge-77+shared+edge.cytable" sourceJoinKey="SUID" targetTable="93-93/LOCAL_ATTRS-org.cytoscape.model.CyEdge-93+default+edge.cytable" targetJoinKey="SUID" immutable="false"/>
        <virtualColumn name="rank" sourceColumn="rank" sourceTable="77-77/SHARED_ATTRS-org.cytoscape.model.CyEdge-77+shared+edge.cytable" sourceJoinKey="SUID" targetTable="93-93/LOCAL_ATTRS-org.cytoscape.model.CyEdge-93+default+edge.cytable" targetJoinKey="SUID" immutable="false"/>
        <virtualColumn name="Class" sourceColumn="Class" sourceTable="77-77/SHARED_ATTRS-org.cytoscape.model.CyEdge-77+shared+edge.cytable" sourceJoinKey="SUID" targetTable="93-93/LOCAL_ATTRS-org.cytoscape.model.CyEdge-93+default+edge.cytable" targetJoinKey="SUID" immutable="false"/>
        <virtualColumn name="shared name" sourceColumn="shared name" sourceTable="82099-lung_GRN4TCGA_LUAD.txt_2/SHARED_ATTRS-org.cytoscape.model.CyEdge-82099+shared+edge.cytable" sourceJoinKey="SUID" targetTable="82099-lung_GRN4TCGA_LUAD.txt_2/LOCAL_ATTRS-org.cytoscape.model.CyEdge-82099+default+edge.cytable" targetJoinKey="SUID" immutable="false"/>
        <virtualColumn name="shared interaction" sourceColumn="shared interaction" sourceTable="82099-lung_GRN4TCGA_LUAD.txt_2/SHARED_ATTRS-org.cytoscape.model.CyEdge-82099+shared+edge.cytable" sourceJoinKey="SUID" targetTable="82099-lung_GRN4TCGA_LUAD.txt_2/LOCAL_ATTRS-org.cytoscape.model.CyEdge-82099+default+edge.cytable" targetJoinKey="SUID" immutable="false"/>
        <virtualColumn name="Ratio_sig" sourceColumn="Ratio_sig" sourceTable="82099-lung_GRN4TCGA_LUAD.txt_2/SHARED_ATTRS-org.cytoscape.model.CyEdge-82099+shared+edge.cytable" sourceJoinKey="SUID" targetTable="82099-lung_GRN4TCGA_LUAD.txt_2/LOCAL_ATTRS-org.cytoscape.model.CyEdge-82099+default+edge.cytable" targetJoinKey="SUID" immutable="false"/>
        <virtualColumn name="shared name" sourceColumn="shared name" sourceTable="77-77/SHARED_ATTRS-org.cytoscape.model.CyNode-77+shared+node.cytable" sourceJoinKey="SUID" targetTable="93-93/LOCAL_ATTRS-org.cytoscape.model.CyNode-93+default+node.cytable" targetJoinKey="SUID" immutable="false"/>
        <virtualColumn name="shared name" sourceColumn="shared name" sourceTable="66396-lung_GRN4GTEx_normal.txt/SHARED_ATTRS-org.cytoscape.model.CyNetwork-66396+shared+network.cytable" sourceJoinKey="SUID" targetTable="66396-lung_GRN4GTEx_normal.txt/LOCAL_ATTRS-org.cytoscape.model.CyNetwork-66396+default+network.cytable" targetJoinKey="SUID" immutable="false"/>
        <virtualColumn name="shared name" sourceColumn="shared name" sourceTable="82198-lung_GRN4TCGA_LUSC.txt_2/SHARED_ATTRS-org.cytoscape.model.CyNode-82198+shared+node.cytable" sourceJoinKey="SUID" targetTable="82224-lung_GRN4TCGA_LUSC.txt_2/LOCAL_ATTRS-org.cytoscape.model.CyNode-lung_GRN4TCGA_LUSC.txt_2+default+node.cytable" targetJoinKey="SUID" immutable="false"/>
        <virtualColumn name="shared name" sourceColumn="shared name" sourceTable="77-77/SHARED_ATTRS-org.cytoscape.model.CyEdge-77+shared+edge.cytable" sourceJoinKey="SUID" targetTable="103-lung_rmMT.paf%2Dth0.00%2Dp1e%2D3%2Drsqr0.30%2Dfiltered%2Dth_ranked.Tissue%2Dunique_class.csGCN.txt/LOCAL_ATTRS-org.cytoscape.model.CyEdge-103+default+edge.cytable" targetJoinKey="SUID" immutable="false"/>
        <virtualColumn name="shared interaction" sourceColumn="shared interaction" sourceTable="77-77/SHARED_ATTRS-org.cytoscape.model.CyEdge-77+shared+edge.cytable" sourceJoinKey="SUID" targetTable="103-lung_rmMT.paf%2Dth0.00%2Dp1e%2D3%2Drsqr0.30%2Dfiltered%2Dth_ranked.Tissue%2Dunique_class.csGCN.txt/LOCAL_ATTRS-org.cytoscape.model.CyEdge-103+default+edge.cytable" targetJoinKey="SUID" immutable="false"/>
        <virtualColumn name="Similarity_Score" sourceColumn="Similarity_Score" sourceTable="77-77/SHARED_ATTRS-org.cytoscape.model.CyEdge-77+shared+edge.cytable" sourceJoinKey="SUID" targetTable="103-lung_rmMT.paf%2Dth0.00%2Dp1e%2D3%2Drsqr0.30%2Dfiltered%2Dth_ranked.Tissue%2Dunique_class.csGCN.txt/LOCAL_ATTRS-org.cytoscape.model.CyEdge-103+default+edge.cytable" targetJoinKey="SUID" immutable="false"/>
        <virtualColumn name="Cluster_Index" sourceColumn="Cluster_Index" sourceTable="77-77/SHARED_ATTRS-org.cytoscape.model.CyEdge-77+shared+edge.cytable" sourceJoinKey="SUID" targetTable="103-lung_rmMT.paf%2Dth0.00%2Dp1e%2D3%2Drsqr0.30%2Dfiltered%2Dth_ranked.Tissue%2Dunique_class.csGCN.txt/LOCAL_ATTRS-org.cytoscape.model.CyEdge-103+default+edge.cytable" targetJoinKey="SUID" immutable="false"/>
        <virtualColumn name="Cluster_Size" sourceColumn="Cluster_Size" sourceTable="77-77/SHARED_ATTRS-org.cytoscape.model.CyEdge-77+shared+edge.cytable" sourceJoinKey="SUID" targetTable="103-lung_rmMT.paf%2Dth0.00%2Dp1e%2D3%2Drsqr0.30%2Dfiltered%2Dth_ranked.Tissue%2Dunique_class.csGCN.txt/LOCAL_ATTRS-org.cytoscape.model.CyEdge-103+default+edge.cytable" targetJoinKey="SUID" immutable="false"/>
        <virtualColumn name="Samples" sourceColumn="Samples" sourceTable="77-77/SHARED_ATTRS-org.cytoscape.model.CyEdge-77+shared+edge.cytable" sourceJoinKey="SUID" targetTable="103-lung_rmMT.paf%2Dth0.00%2Dp1e%2D3%2Drsqr0.30%2Dfiltered%2Dth_ranked.Tissue%2Dunique_class.csGCN.txt/LOCAL_ATTRS-org.cytoscape.model.CyEdge-103+default+edge.cytable" targetJoinKey="SUID" immutable="false"/>
        <virtualColumn name="Test_Name" sourceColumn="Test_Name" sourceTable="77-77/SHARED_ATTRS-org.cytoscape.model.CyEdge-77+shared+edge.cytable" sourceJoinKey="SUID" targetTable="103-lung_rmMT.paf%2Dth0.00%2Dp1e%2D3%2Drsqr0.30%2Dfiltered%2Dth_ranked.Tissue%2Dunique_class.csGCN.txt/LOCAL_ATTRS-org.cytoscape.model.CyEdge-103+default+edge.cytable" targetJoinKey="SUID" immutable="false"/>
        <virtualColumn name="p_value" sourceColumn="p_value" sourceTable="77-77/SHARED_ATTRS-org.cytoscape.model.CyEdge-77+shared+edge.cytable" sourceJoinKey="SUID" targetTable="103-lung_rmMT.paf%2Dth0.00%2Dp1e%2D3%2Drsqr0.30%2Dfiltered%2Dth_ranked.Tissue%2Dunique_class.csGCN.txt/LOCAL_ATTRS-org.cytoscape.model.CyEdge-103+default+edge.cytable" targetJoinKey="SUID" immutable="false"/>
        <virtualColumn name="r_squared" sourceColumn="r_squared" sourceTable="77-77/SHARED_ATTRS-org.cytoscape.model.CyEdge-77+shared+edge.cytable" sourceJoinKey="SUID" targetTable="103-lung_rmMT.paf%2Dth0.00%2Dp1e%2D3%2Drsqr0.30%2Dfiltered%2Dth_ranked.Tissue%2Dunique_class.csGCN.txt/LOCAL_ATTRS-org.cytoscape.model.CyEdge-103+default+edge.cytable" targetJoinKey="SUID" immutable="false"/>
        <virtualColumn name="rank" sourceColumn="rank" sourceTable="77-77/SHARED_ATTRS-org.cytoscape.model.CyEdge-77+shared+edge.cytable" sourceJoinKey="SUID" targetTable="103-lung_rmMT.paf%2Dth0.00%2Dp1e%2D3%2Drsqr0.30%2Dfiltered%2Dth_ranked.Tissue%2Dunique_class.csGCN.txt/LOCAL_ATTRS-org.cytoscape.model.CyEdge-103+default+edge.cytable" targetJoinKey="SUID" immutable="false"/>
        <virtualColumn name="Class" sourceColumn="Class" sourceTable="77-77/SHARED_ATTRS-org.cytoscape.model.CyEdge-77+shared+edge.cytable" sourceJoinKey="SUID" targetTable="103-lung_rmMT.paf%2Dth0.00%2Dp1e%2D3%2Drsqr0.30%2Dfiltered%2Dth_ranked.Tissue%2Dunique_class.csGCN.txt/LOCAL_ATTRS-org.cytoscape.model.CyEdge-103+default+edge.cytable" targetJoinKey="SUID" immutable="false"/>
        <virtualColumn name="shared name" sourceColumn="shared name" sourceTable="66396-lung_GRN4GTEx_normal.txt/SHARED_ATTRS-org.cytoscape.model.CyNode-66396+shared+node.cytable" sourceJoinKey="SUID" targetTable="66412-66412/LOCAL_ATTRS-org.cytoscape.model.CyNode-66412+default+node.cytable" targetJoinKey="SUID" immutable="false"/>
        <virtualColumn name="shared name" sourceColumn="shared name" sourceTable="66396-lung_GRN4GTEx_normal.txt/SHARED_ATTRS-org.cytoscape.model.CyNode-66396+shared+node.cytable" sourceJoinKey="SUID" targetTable="66396-lung_GRN4GTEx_normal.txt/LOCAL_ATTRS-org.cytoscape.model.CyNode-66396+default+node.cytable" targetJoinKey="SUID" immutable="false"/>
        <virtualColumn name="shared name" sourceColumn="shared name" sourceTable="35-lung_GRN4TCGA_normal.txt/SHARED_ATTRS-org.cytoscape.model.CyEdge-35+shared+edge.cytable" sourceJoinKey="SUID" targetTable="51-51/LOCAL_ATTRS-org.cytoscape.model.CyEdge-51+default+edge.cytable" targetJoinKey="SUID" immutable="false"/>
        <virtualColumn name="shared interaction" sourceColumn="shared interaction" sourceTable="35-lung_GRN4TCGA_normal.txt/SHARED_ATTRS-org.cytoscape.model.CyEdge-35+shared+edge.cytable" sourceJoinKey="SUID" targetTable="51-51/LOCAL_ATTRS-org.cytoscape.model.CyEdge-51+default+edge.cytable" targetJoinKey="SUID" immutable="false"/>
        <virtualColumn name="shared name" sourceColumn="shared name" sourceTable="82198-lung_GRN4TCGA_LUSC.txt_2/SHARED_ATTRS-org.cytoscape.model.CyNode-82198+shared+node.cytable" sourceJoinKey="SUID" targetTable="82214-82214/LOCAL_ATTRS-org.cytoscape.model.CyNode-82214+default+node.cytable" targetJoinKey="SUID" immutable="false"/>
        <virtualColumn name="shared name" sourceColumn="shared name" sourceTable="82198-lung_GRN4TCGA_LUSC.txt_2/SHARED_ATTRS-org.cytoscape.model.CyNetwork-82198+shared+network.cytable" sourceJoinKey="SUID" targetTable="82198-lung_GRN4TCGA_LUSC.txt_2/LOCAL_ATTRS-org.cytoscape.model.CyNetwork-82198+default+network.cytable" targetJoinKey="SUID" immutable="false"/>
        <virtualColumn name="shared name" sourceColumn="shared name" sourceTable="66396-lung_GRN4GTEx_normal.txt/SHARED_ATTRS-org.cytoscape.model.CyNetwork-66396+shared+network.cytable" sourceJoinKey="SUID" targetTable="66422-lung_GRN4GTEx_normal.txt/LOCAL_ATTRS-org.cytoscape.model.CyNetwork-lung_GRN4GTEx_normal.txt+default+network.cytable" targetJoinKey="SUID" immutable="false"/>
        <virtualColumn name="shared name" sourceColumn="shared name" sourceTable="77-77/SHARED_ATTRS-org.cytoscape.model.CyNetwork-77+shared+network.cytable" sourceJoinKey="SUID" targetTable="103-lung_rmMT.paf%2Dth0.00%2Dp1e%2D3%2Drsqr0.30%2Dfiltered%2Dth_ranked.Tissue%2Dunique_class.csGCN.txt/LOCAL_ATTRS-org.cytoscape.model.CyNetwork-103+default+network.cytable" targetJoinKey="SUID" immutable="false"/>
        <virtualColumn name="shared name" sourceColumn="shared name" sourceTable="35-lung_GRN4TCGA_normal.txt/SHARED_ATTRS-org.cytoscape.model.CyNode-35+shared+node.cytable" sourceJoinKey="SUID" targetTable="35-lung_GRN4TCGA_normal.txt/LOCAL_ATTRS-org.cytoscape.model.CyNode-35+default+node.cytable" targetJoinKey="SUID" immutable="false"/>
        <virtualColumn name="shared name" sourceColumn="shared name" sourceTable="82099-lung_GRN4TCGA_LUAD.txt_2/SHARED_ATTRS-org.cytoscape.model.CyNode-82099+shared+node.cytable" sourceJoinKey="SUID" targetTable="82099-lung_GRN4TCGA_LUAD.txt_2/LOCAL_ATTRS-org.cytoscape.model.CyNode-82099+default+node.cytable" targetJoinKey="SUID" immutable="false"/>
        <virtualColumn name="shared name" sourceColumn="shared name" sourceTable="66396-lung_GRN4GTEx_normal.txt/SHARED_ATTRS-org.cytoscape.model.CyNode-66396+shared+node.cytable" sourceJoinKey="SUID" targetTable="66422-lung_GRN4GTEx_normal.txt/LOCAL_ATTRS-org.cytoscape.model.CyNode-lung_GRN4GTEx_normal.txt+default+node.cytable" targetJoinKey="SUID" immutable="false"/>
        <virtualColumn name="shared name" sourceColumn="shared name" sourceTable="82198-lung_GRN4TCGA_LUSC.txt_2/SHARED_ATTRS-org.cytoscape.model.CyEdge-82198+shared+edge.cytable" sourceJoinKey="SUID" targetTable="82224-lung_GRN4TCGA_LUSC.txt_2/LOCAL_ATTRS-org.cytoscape.model.CyEdge-lung_GRN4TCGA_LUSC.txt_2+default+edge.cytable" targetJoinKey="SUID" immutable="false"/>
        <virtualColumn name="shared interaction" sourceColumn="shared interaction" sourceTable="82198-lung_GRN4TCGA_LUSC.txt_2/SHARED_ATTRS-org.cytoscape.model.CyEdge-82198+shared+edge.cytable" sourceJoinKey="SUID" targetTable="82224-lung_GRN4TCGA_LUSC.txt_2/LOCAL_ATTRS-org.cytoscape.model.CyEdge-lung_GRN4TCGA_LUSC.txt_2+default+edge.cytable" targetJoinKey="SUID" immutable="false"/>
        <virtualColumn name="ratio_sig" sourceColumn="ratio_sig" sourceTable="82198-lung_GRN4TCGA_LUSC.txt_2/SHARED_ATTRS-org.cytoscape.model.CyEdge-82198+shared+edge.cytable" sourceJoinKey="SUID" targetTable="82224-lung_GRN4TCGA_LUSC.txt_2/LOCAL_ATTRS-org.cytoscape.model.CyEdge-lung_GRN4TCGA_LUSC.txt_2+default+edge.cytable" targetJoinKey="SUID" immutable="false"/>
        <virtualColumn name="shared name" sourceColumn="shared name" sourceTable="77-77/SHARED_ATTRS-org.cytoscape.model.CyNode-77+shared+node.cytable" sourceJoinKey="SUID" targetTable="103-lung_rmMT.paf%2Dth0.00%2Dp1e%2D3%2Drsqr0.30%2Dfiltered%2Dth_ranked.Tissue%2Dunique_class.csGCN.txt/LOCAL_ATTRS-org.cytoscape.model.CyNode-103+default+node.cytable" targetJoinKey="SUID" immutable="false"/>
        <virtualColumn name="shared name" sourceColumn="shared name" sourceTable="35-lung_GRN4TCGA_normal.txt/SHARED_ATTRS-org.cytoscape.model.CyNetwork-35+shared+network.cytable" sourceJoinKey="SUID" targetTable="35-lung_GRN4TCGA_normal.txt/LOCAL_ATTRS-org.cytoscape.model.CyNetwork-35+default+network.cytable" targetJoinKey="SUID" immutable="false"/>
        <virtualColumn name="shared name" sourceColumn="shared name" sourceTable="35-lung_GRN4TCGA_normal.txt/SHARED_ATTRS-org.cytoscape.model.CyNetwork-35+shared+network.cytable" sourceJoinKey="SUID" targetTable="51-51/LOCAL_ATTRS-org.cytoscape.model.CyNetwork-51+default+network.cytable" targetJoinKey="SUID" immutable="false"/>
        <virtualColumn name="shared name" sourceColumn="shared name" sourceTable="82099-lung_GRN4TCGA_LUAD.txt_2/SHARED_ATTRS-org.cytoscape.model.CyNetwork-82099+shared+network.cytable" sourceJoinKey="SUID" targetTable="82099-lung_GRN4TCGA_LUAD.txt_2/LOCAL_ATTRS-org.cytoscape.model.CyNetwork-82099+default+network.cytable" targetJoinKey="SUID" immutable="false"/>
        <virtualColumn name="shared name" sourceColumn="shared name" sourceTable="77-77/SHARED_ATTRS-org.cytoscape.model.CyEdge-77+shared+edge.cytable" sourceJoinKey="SUID" targetTable="77-77/LOCAL_ATTRS-org.cytoscape.model.CyEdge-77+default+edge.cytable" targetJoinKey="SUID" immutable="false"/>
        <virtualColumn name="shared interaction" sourceColumn="shared interaction" sourceTable="77-77/SHARED_ATTRS-org.cytoscape.model.CyEdge-77+shared+edge.cytable" sourceJoinKey="SUID" targetTable="77-77/LOCAL_ATTRS-org.cytoscape.model.CyEdge-77+default+edge.cytable" targetJoinKey="SUID" immutable="false"/>
        <virtualColumn name="Similarity_Score" sourceColumn="Similarity_Score" sourceTable="77-77/SHARED_ATTRS-org.cytoscape.model.CyEdge-77+shared+edge.cytable" sourceJoinKey="SUID" targetTable="77-77/LOCAL_ATTRS-org.cytoscape.model.CyEdge-77+default+edge.cytable" targetJoinKey="SUID" immutable="false"/>
        <virtualColumn name="Cluster_Index" sourceColumn="Cluster_Index" sourceTable="77-77/SHARED_ATTRS-org.cytoscape.model.CyEdge-77+shared+edge.cytable" sourceJoinKey="SUID" targetTable="77-77/LOCAL_ATTRS-org.cytoscape.model.CyEdge-77+default+edge.cytable" targetJoinKey="SUID" immutable="false"/>
        <virtualColumn name="Cluster_Size" sourceColumn="Cluster_Size" sourceTable="77-77/SHARED_ATTRS-org.cytoscape.model.CyEdge-77+shared+edge.cytable" sourceJoinKey="SUID" targetTable="77-77/LOCAL_ATTRS-org.cytoscape.model.CyEdge-77+default+edge.cytable" targetJoinKey="SUID" immutable="false"/>
        <virtualColumn name="Samples" sourceColumn="Samples" sourceTable="77-77/SHARED_ATTRS-org.cytoscape.model.CyEdge-77+shared+edge.cytable" sourceJoinKey="SUID" targetTable="77-77/LOCAL_ATTRS-org.cytoscape.model.CyEdge-77+default+edge.cytable" targetJoinKey="SUID" immutable="false"/>
        <virtualColumn name="Test_Name" sourceColumn="Test_Name" sourceTable="77-77/SHARED_ATTRS-org.cytoscape.model.CyEdge-77+shared+edge.cytable" sourceJoinKey="SUID" targetTable="77-77/LOCAL_ATTRS-org.cytoscape.model.CyEdge-77+default+edge.cytable" targetJoinKey="SUID" immutable="false"/>
        <virtualColumn name="p_value" sourceColumn="p_value" sourceTable="77-77/SHARED_ATTRS-org.cytoscape.model.CyEdge-77+shared+edge.cytable" sourceJoinKey="SUID" targetTable="77-77/LOCAL_ATTRS-org.cytoscape.model.CyEdge-77+default+edge.cytable" targetJoinKey="SUID" immutable="false"/>
        <virtualColumn name="r_squared" sourceColumn="r_squared" sourceTable="77-77/SHARED_ATTRS-org.cytoscape.model.CyEdge-77+shared+edge.cytable" sourceJoinKey="SUID" targetTable="77-77/LOCAL_ATTRS-org.cytoscape.model.CyEdge-77+default+edge.cytable" targetJoinKey="SUID" immutable="false"/>
        <virtualColumn name="rank" sourceColumn="rank" sourceTable="77-77/SHARED_ATTRS-org.cytoscape.model.CyEdge-77+shared+edge.cytable" sourceJoinKey="SUID" targetTable="77-77/LOCAL_ATTRS-org.cytoscape.model.CyEdge-77+default+edge.cytable" targetJoinKey="SUID" immutable="false"/>
        <virtualColumn name="Class" sourceColumn="Class" sourceTable="77-77/SHARED_ATTRS-org.cytoscape.model.CyEdge-77+shared+edge.cytable" sourceJoinKey="SUID" targetTable="77-77/LOCAL_ATTRS-org.cytoscape.model.CyEdge-77+default+edge.cytable" targetJoinKey="SUID" immutable="false"/>
        <virtualColumn name="shared name" sourceColumn="shared name" sourceTable="82099-lung_GRN4TCGA_LUAD.txt_2/SHARED_ATTRS-org.cytoscape.model.CyNode-82099+shared+node.cytable" sourceJoinKey="SUID" targetTable="82115-82115/LOCAL_ATTRS-org.cytoscape.model.CyNode-82115+default+node.cytable" targetJoinKey="SUID" immutable="false"/>
    </virtualColumns>
</cyTables>
