# Supplementary material
Source: publisher figshare collection journal article supplement (https://springernature.figshare.com/ndownloader/files/35041376)
Supplement: Supplementary file 1 [file 35041376 › CytoscapeSession-2021_06_28-02_05/views/61-83391-lung_GRN4TCGA_normal.txt.xgmml]

<?xml version="1.0" encoding="UTF-8" standalone="yes"?>
<graph id="83391" label="83391" cy:view="1" cy:networkId="61" cy:visualStyle="default" cy:rendererId="org.cytoscape.ding" cy:documentVersion="3.0" xmlns:dc="http://purl.org/dc/elements/1.1/" xmlns:xlink="http://www.w3.org/1999/xlink" xmlns:rdf="http://www.w3.org/1999/02/22-rdf-syntax-ns#" xmlns:cy="http://www.cytoscape.org" xmlns="http://www.cs.rpi.edu/XGMML">
  <graphics>
    <att name="NETWORK_FORCE_HIGH_DETAIL" value="false" type="string" cy:type="String"/>
    <att name="NETWORK_EDGE_SELECTION" value="true" type="string" cy:type="String"/>
    <att name="NETWORK_TITLE" value="" type="string" cy:type="String"/>
    <att name="NETWORK_WIDTH" value="1251.0" type="string" cy:type="String"/>
    <att name="NETWORK_NODE_SELECTION" value="true" type="string" cy:type="String"/>
    <att name="NETWORK_NODE_LABEL_SELECTION" value="false" type="string" cy:type="String"/>
    <att name="NETWORK_CENTER_X_LOCATION" value="-7.939271926879883" type="string" cy:type="String"/>
    <att name="NETWORK_CENTER_Z_LOCATION" value="0.0" type="string" cy:type="String"/>
    <att name="NETWORK_DEPTH" value="0.0" type="string" cy:type="String"/>
    <att name="NETWORK_HEIGHT" value="488.0" type="string" cy:type="String"/>
    <att name="NETWORK_ANNOTATION_SELECTION" value="false" type="string" cy:type="String"/>
    <att name="NETWORK_CENTER_Y_LOCATION" value="-8.185082117716465" type="string" cy:type="String"/>
    <att name="NETWORK_SCALE_FACTOR" value="2.304522808644731" type="string" cy:type="String"/>
  </graphics>
  <node id="83394" label="ZBTB33" cy:nodeId="71">
    <graphics y="43.84341176350912" x="44.16774368286133" z="0.0"/>
  </node>
  <node id="83393" label="SLC34A2" cy:nodeId="72">
    <graphics y="-60.213575998942055" x="15.878543853759766" z="0.0"/>
  </node>
  <node id="83392" label="LGI3" cy:nodeId="73">
    <graphics y="16.370164235432945" x="-60.046287536621094" z="0.0"/>
  </node>
</graph>
