# Supplementary material
Source: publisher figshare collection journal article supplement (https://springernature.figshare.com/ndownloader/files/35041376)
Supplement: Supplementary file 1 [file 35041376 › CytoscapeSession-2021_06_28-02_05/views/66422-84503-lung_GRN4GTEx_normal.txt.xgmml]

<?xml version="1.0" encoding="UTF-8" standalone="yes"?>
<graph id="84503" label="84503" cy:view="1" cy:networkId="66422" cy:visualStyle="default" cy:rendererId="org.cytoscape.ding" cy:documentVersion="3.0" xmlns:dc="http://purl.org/dc/elements/1.1/" xmlns:xlink="http://www.w3.org/1999/xlink" xmlns:rdf="http://www.w3.org/1999/02/22-rdf-syntax-ns#" xmlns:cy="http://www.cytoscape.org" xmlns="http://www.cs.rpi.edu/XGMML">
  <graphics>
    <att name="NETWORK_FORCE_HIGH_DETAIL" value="false" type="string" cy:type="String"/>
    <att name="NETWORK_EDGE_SELECTION" value="true" type="string" cy:type="String"/>
    <att name="NETWORK_TITLE" value="" type="string" cy:type="String"/>
    <att name="NETWORK_WIDTH" value="1251.0" type="string" cy:type="String"/>
    <att name="NETWORK_NODE_SELECTION" value="true" type="string" cy:type="String"/>
    <att name="NETWORK_NODE_LABEL_SELECTION" value="false" type="string" cy:type="String"/>
    <att name="NETWORK_CENTER_X_LOCATION" value="119.6502112609191" type="string" cy:type="String"/>
    <att name="NETWORK_CENTER_Z_LOCATION" value="0.0" type="string" cy:type="String"/>
    <att name="NETWORK_DEPTH" value="0.0" type="string" cy:type="String"/>
    <att name="NETWORK_HEIGHT" value="488.0" type="string" cy:type="String"/>
    <att name="NETWORK_ANNOTATION_SELECTION" value="false" type="string" cy:type="String"/>
    <att name="NETWORK_CENTER_Y_LOCATION" value="-106.86008249725683" type="string" cy:type="String"/>
    <att name="NETWORK_SCALE_FACTOR" value="0.33033180106214083" type="string" cy:type="String"/>
  </graphics>
  <node id="85932" label="GOT2" cy:nodeId="66560">
    <graphics y="-238.19290720428808" x="44.78215782463974" z="0.0"/>
  </node>
  <node id="84908" label="CCDC97" cy:nodeId="67584">
    <graphics y="55.66074193511622" x="81.34177391350693" z="0.0"/>
  </node>
  <node id="85900" label="CTSA" cy:nodeId="66592">
    <graphics y="27.412004599911143" x="94.52676384270615" z="0.0"/>
  </node>
  <node id="84876" label="HENMT1" cy:nodeId="67616">
    <graphics y="220.559793601376" x="419.26685325921005" z="0.0"/>
  </node>
  <node id="85868" label="MRPS33" cy:nodeId="66624">
    <graphics y="61.707721839291025" x="163.9175490599913" z="0.0"/>
  </node>
  <node id="84844" label="MRTO4" cy:nodeId="67648">
    <graphics y="-107.72435556854589" x="47.819183276299896" z="0.0"/>
  </node>
  <node id="85836" label="SEPHS2" cy:nodeId="66656">
    <graphics y="-0.03463541473729492" x="137.32039635003036" z="0.0"/>
  </node>
  <node id="84812" label="C1GALT1C1" cy:nodeId="67680">
    <graphics y="297.3548375466885" x="359.5999221068663" z="0.0"/>
  </node>
  <node id="85804" label="COMMD9" cy:nodeId="66688">
    <graphics y="66.24043286834376" x="54.51677696526474" z="0.0"/>
  </node>
  <node id="84780" label="DCTD" cy:nodeId="67712">
    <graphics y="-274.6772211691318" x="131.46962730706161" z="0.0"/>
  </node>
  <node id="85772" label="ST3GAL5" cy:nodeId="66720">
    <graphics y="217.52970326934474" x="176.8483351928038" z="0.0"/>
  </node>
  <node id="84748" label="DSCR3" cy:nodeId="67744">
    <graphics y="220.4863377908291" x="-12.834203793402253" z="0.0"/>
  </node>
  <node id="85740" label="CIAO1" cy:nodeId="66752">
    <graphics y="-293.32422434295995" x="-8.6387196320253" z="0.0"/>
  </node>
  <node id="84716" label="GLS2" cy:nodeId="67776">
    <graphics y="163.0097218850674" x="399.2781447631163" z="0.0"/>
  </node>
  <node id="85708" label="FAM103A1" cy:nodeId="66784">
    <graphics y="43.50580800567286" x="97.36804954827255" z="0.0"/>
  </node>
  <node id="84684" label="CDK2AP2" cy:nodeId="67808">
    <graphics y="436.7184392312588" x="-33.70838506400162" z="0.0"/>
  </node>
  <node id="85676" label="CD163" cy:nodeId="66816">
    <graphics y="3.48840535674708" x="-174.60066993414932" z="0.0"/>
  </node>
  <node id="84652" label="PQLC2" cy:nodeId="67840">
    <graphics y="265.1630498269619" x="463.4966506224913" z="0.0"/>
  </node>
  <node id="85644" label="ZNF696" cy:nodeId="66848">
    <graphics y="120.2886296609463" x="240.43448631585068" z="0.0"/>
  </node>
  <node id="84620" label="RAD1" cy:nodeId="67872">
    <graphics y="-259.18640696014745" x="-205.87567908942276" z="0.0"/>
  </node>
  <node id="85612" label="ACAD10" cy:nodeId="66880">
    <graphics y="299.9427586892666" x="191.99228660881943" z="0.0"/>
  </node>
  <node id="84588" label="MRPS18B" cy:nodeId="67904">
    <graphics y="-267.7079218527256" x="-293.4980088013368" z="0.0"/>
  </node>
  <node id="85580" label="ANAPC11" cy:nodeId="66912">
    <graphics y="236.75783742461817" x="-236.03890235602432" z="0.0"/>
  </node>
  <node id="84556" label="CD164L2" cy:nodeId="67936">
    <graphics y="-631.2721613546787" x="-503.07775123297745" z="0.0"/>
  </node>
  <node id="85548" label="KLHL12" cy:nodeId="66944">
    <graphics y="217.55646718536036" x="42.69432823479599" z="0.0"/>
  </node>
  <node id="84524" label="EFCAB11" cy:nodeId="67968">
    <graphics y="-469.54150949920995" x="-423.4372788208681" z="0.0"/>
  </node>
  <node id="85516" label="RILP" cy:nodeId="66976">
    <graphics y="138.67743123565333" x="-161.79109962164932" z="0.0"/>
  </node>
  <node id="85484" label="ZNF362" cy:nodeId="67008">
    <graphics y="-303.42383371795995" x="-73.75703437506729" z="0.0"/>
  </node>
  <node id="85452" label="BTF3L4" cy:nodeId="67040">
    <graphics y="67.08022225890772" x="396.13684837639755" z="0.0"/>
  </node>
  <node id="85420" label="KIF4A" cy:nodeId="67072">
    <graphics y="147.3859197000088" x="301.00916282952255" z="0.0"/>
  </node>
  <node id="85388" label="RPL26L1" cy:nodeId="67104">
    <graphics y="391.5209599832119" x="123.20790855706161" z="0.0"/>
  </node>
  <node id="85356" label="ALPL" cy:nodeId="67136">
    <graphics y="27.899919638973643" x="-142.21783454596573" z="0.0"/>
  </node>
  <node id="85324" label="TBC1D2" cy:nodeId="67168">
    <graphics y="-81.55049692596776" x="207.452384875421" z="0.0"/>
  </node>
  <node id="85292" label="NECAB3" cy:nodeId="67200">
    <graphics y="137.17179311309474" x="-340.88426978766495" z="0.0"/>
  </node>
  <node id="85260" label="POC1A" cy:nodeId="67232">
    <graphics y="-140.53105722870214" x="163.10718529046005" z="0.0"/>
  </node>
  <node id="85228" label="CDC20" cy:nodeId="67264">
    <graphics y="-5.382390846866201" x="120.9953078490538" z="0.0"/>
  </node>
  <node id="85196" label="UNG" cy:nodeId="67296">
    <graphics y="346.3199101785244" x="-86.54872138678604" z="0.0"/>
  </node>
  <node id="85164" label="VEPH1" cy:nodeId="67328">
    <graphics y="26.907434592586924" x="-225.95432288825089" z="0.0"/>
  </node>
  <node id="85132" label="C4orf47" cy:nodeId="67360">
    <graphics y="-785.99316965546" x="-403.3633652466493" z="0.0"/>
  </node>
  <node id="85100" label="CCDC74A" cy:nodeId="67392">
    <graphics y="-700.6841486593662" x="-577.624015881415" z="0.0"/>
  </node>
  <node id="85068" label="SP4" cy:nodeId="67424">
    <graphics y="19.1570378640713" x="-212.65241248786026" z="0.0"/>
  </node>
  <node id="86060" label="ELK4" cy:nodeId="66432">
    <graphics y="97.34436429534571" x="55.91907493889755" z="0.0"/>
  </node>
  <node id="85036" label="TLX2" cy:nodeId="67456">
    <graphics y="-764.009038796085" x="-692.2379074829774" z="0.0"/>
  </node>
  <node id="86028" label="MCM4" cy:nodeId="66464">
    <graphics y="95.54793370757716" x="114.66121666253036" z="0.0"/>
  </node>
  <node id="85004" label="QDPR" cy:nodeId="67488">
    <graphics y="30.540254721981455" x="119.62378685296005" z="0.0"/>
  </node>
  <node id="85996" label="NUBP1" cy:nodeId="66496">
    <graphics y="-10.958387245791982" x="-45.81059272467667" z="0.0"/>
  </node>
  <node id="84972" label="SLC36A1" cy:nodeId="67520">
    <graphics y="-7.450345863956045" x="12.703750537042083" z="0.0"/>
  </node>
  <node id="85964" label="SFXN4" cy:nodeId="66528">
    <graphics y="161.1089879373135" x="115.30075828850693" z="0.0"/>
  </node>
  <node id="84940" label="SHE" cy:nodeId="67552">
    <graphics y="583.2245427468838" x="334.65491478264755" z="0.0"/>
  </node>
  <node id="85931" label="PYCR1" cy:nodeId="66561">
    <graphics y="60.30954564605372" x="90.7791213256163" z="0.0"/>
  </node>
  <node id="84907" label="RPL7L1" cy:nodeId="67585">
    <graphics y="179.3827458718838" x="388.6626967650694" z="0.0"/>
  </node>
  <node id="85899" label="METTL13" cy:nodeId="66593">
    <graphics y="319.9922887185635" x="66.27925102532333" z="0.0"/>
  </node>
  <node id="84875" label="SPSB2" cy:nodeId="67617">
    <graphics y="-60.458944191592764" x="385.0108107787413" z="0.0"/>
  </node>
  <node id="85867" label="SLC5A6" cy:nodeId="66625">
    <graphics y="-51.5430353781162" x="-30.586418702002106" z="0.0"/>
  </node>
  <node id="84843" label="RPS19BP1" cy:nodeId="67649">
    <graphics y="497.65270436797755" x="87.0337599974913" z="0.0"/>
  </node>
  <node id="85835" label="EGFL7" cy:nodeId="66657">
    <graphics y="373.4558965066494" x="71.72622673333115" z="0.0"/>
  </node>
  <node id="84811" label="C6orf203" cy:nodeId="67681">
    <graphics y="-73.42244516815526" x="147.02085106194443" z="0.0"/>
  </node>
  <node id="85803" label="AIF1" cy:nodeId="66689">
    <graphics y="-29.3660334249912" x="234.40036766350693" z="0.0"/>
  </node>
  <node id="84779" label="TIMM50" cy:nodeId="67713">
    <graphics y="-175.43059336151464" x="429.0276259642882" z="0.0"/>
  </node>
  <node id="85771" label="ISCA2" cy:nodeId="66721">
    <graphics y="28.773271689754893" x="272.4413527709288" z="0.0"/>
  </node>
  <node id="84747" label="CDC25C" cy:nodeId="67745">
    <graphics y="-146.33170114960058" x="531.6716994506163" z="0.0"/>
  </node>
  <node id="85739" label="HDHD3" cy:nodeId="66753">
    <graphics y="93.04178441558497" x="246.66318504631943" z="0.0"/>
  </node>
  <node id="84715" label="UBLCP1" cy:nodeId="67777">
    <graphics y="268.70267690215724" x="261.83899681389755" z="0.0"/>
  </node>
  <node id="85707" label="C1orf162" cy:nodeId="66785">
    <graphics y="113.4358235696377" x="98.7085646849913" z="0.0"/>
  </node>
  <node id="84683" label="DSN1" cy:nodeId="67809">
    <graphics y="187.77997029815333" x="162.5123213988585" z="0.0"/>
  </node>
  <node id="85675" label="TBCC" cy:nodeId="66817">
    <graphics y="192.61373342071192" x="58.52549736321396" z="0.0"/>
  </node>
  <node id="84651" label="SNX1" cy:nodeId="67841">
    <graphics y="333.0581303933682" x="-335.3542710083681" z="0.0"/>
  </node>
  <node id="85643" label="ELF4" cy:nodeId="66849">
    <graphics y="82.41744435821192" x="81.06391899407333" z="0.0"/>
  </node>
  <node id="84619" label="NDUFAB1" cy:nodeId="67873">
    <graphics y="-358.4918573996006" x="-58.93350417792374" z="0.0"/>
  </node>
  <node id="85611" label="ATP5F1" cy:nodeId="66881">
    <graphics y="153.26850331817286" x="132.90178673088974" z="0.0"/>
  </node>
  <node id="84587" label="EIF4EBP1" cy:nodeId="67905">
    <graphics y="347.6605473855557" x="-327.7238083618837" z="0.0"/>
  </node>
  <node id="85579" label="C17orf62" cy:nodeId="66913">
    <graphics y="-20.8955744406162" x="-195.04991920172745" z="0.0"/>
  </node>
  <node id="84555" label="RSPH9" cy:nodeId="67937">
    <graphics y="-664.5609186788975" x="-430.7522812622743" z="0.0"/>
  </node>
  <node id="85547" label="VPS25" cy:nodeId="66945">
    <graphics y="28.8451482156338" x="74.54595939934677" z="0.0"/>
  </node>
  <node id="84523" label="SLC27A2" cy:nodeId="67969">
    <graphics y="-418.1272333761631" x="-595.3279953736024" z="0.0"/>
  </node>
  <node id="85515" label="DTYMK" cy:nodeId="66977">
    <graphics y="107.2463704446377" x="142.46559898674911" z="0.0"/>
  </node>
  <node id="85483" label="COG2" cy:nodeId="67009">
    <graphics y="-254.74533640350683" x="-15.452446057196198" z="0.0"/>
  </node>
  <node id="85451" label="CPOX" cy:nodeId="67041">
    <graphics y="-152.00461374725683" x="438.2758559447569" z="0.0"/>
  </node>
  <node id="85419" label="NABP2" cy:nodeId="67073">
    <graphics y="-27.97913156952245" x="220.04459373772568" z="0.0"/>
  </node>
  <node id="85387" label="SNRPE" cy:nodeId="67105">
    <graphics y="-61.70085703338964" x="441.2958754760069" z="0.0"/>
  </node>
  <node id="85355" label="PPP1R14C" cy:nodeId="67137">
    <graphics y="-170.88643442596776" x="-326.8436814087587" z="0.0"/>
  </node>
  <node id="85323" label="ZBTB33" cy:nodeId="67169">
    <graphics y="125.32128346954005" x="52.2304152709288" z="0.0"/>
  </node>
  <node id="85291" label="FZD5" cy:nodeId="67201">
    <graphics y="-83.95567881073339" x="-336.1248398560243" z="0.0"/>
  </node>
  <node id="85259" label="RFC4" cy:nodeId="67233">
    <graphics y="21.753408561092783" x="35.513511584405364" z="0.0"/>
  </node>
  <node id="85227" label="MSTO1" cy:nodeId="67265">
    <graphics y="271.0260869363369" x="-28.982985092993317" z="0.0"/>
  </node>
  <node id="85195" label="B3GALT6" cy:nodeId="67297">
    <graphics y="481.87902272735255" x="19.301216052178802" z="0.0"/>
  </node>
  <node id="85163" label="SECISBP2L" cy:nodeId="67329">
    <graphics y="-162.0728205343662" x="-459.32640845953995" z="0.0"/>
  </node>
  <node id="85131" label="FANK1" cy:nodeId="67361">
    <graphics y="-618.3809870382725" x="-376.8686753052431" z="0.0"/>
  </node>
  <node id="85099" label="PVRL4" cy:nodeId="67393">
    <graphics y="-565.1671198507725" x="-551.2551804321962" z="0.0"/>
  </node>
  <node id="85067" label="TFEC" cy:nodeId="67425">
    <graphics y="-130.7158106466709" x="-615.3533859986024" z="0.0"/>
  </node>
  <node id="86059" label="ABCA3" cy:nodeId="66433">
    <graphics y="-15.806501259463857" x="-165.65554053961807" z="0.0"/>
  </node>
  <node id="85035" label="JUN" cy:nodeId="67457">
    <graphics y="-834.8898371359287" x="-757.079582287665" z="0.0"/>
  </node>
  <node id="86027" label="MRPL3" cy:nodeId="66465">
    <graphics y="109.21507085357325" x="-56.00147254645401" z="0.0"/>
  </node>
  <node id="85003" label="ARCN1" cy:nodeId="67489">
    <graphics y="-111.42528330292089" x="17.229278491143646" z="0.0"/>
  </node>
  <node id="85995" label="PAFAH1B3" cy:nodeId="66497">
    <graphics y="153.59105123077052" x="73.05377189934677" z="0.0"/>
  </node>
  <node id="84971" label="ECH1" cy:nodeId="67521">
    <graphics y="93.09596456084864" x="-145.72836311041885" z="0.0"/>
  </node>
  <node id="85963" label="CCR1" cy:nodeId="66529">
    <graphics y="399.43456471954005" x="-185.94110877692276" z="0.0"/>
  </node>
  <node id="84939" label="MNDA" cy:nodeId="67553">
    <graphics y="113.71076406036036" x="321.6166762572569" z="0.0"/>
  </node>
  <node id="85930" label="TMEM199" cy:nodeId="66562">
    <graphics y="367.1070195535244" x="-23.524824215765534" z="0.0"/>
  </node>
  <node id="84906" label="RDH13" cy:nodeId="67586">
    <graphics y="-206.77506052460058" x="285.5291518431944" z="0.0"/>
  </node>
  <node id="85898" label="PTAFR" cy:nodeId="66594">
    <graphics y="-7.797384132999014" x="38.98036186516708" z="0.0"/>
  </node>
  <node id="84874" label="CHAC2" cy:nodeId="67618">
    <graphics y="211.4183141091885" x="118.3310012084288" z="0.0"/>
  </node>
  <node id="85866" label="MRPL15" cy:nodeId="66626">
    <graphics y="231.5481053689541" x="184.40332786858505" z="0.0"/>
  </node>
  <node id="84842" label="ZNF517" cy:nodeId="67650">
    <graphics y="225.928934226376" x="-347.61803443610245" z="0.0"/>
  </node>
  <node id="85834" label="MTX2" cy:nodeId="66658">
    <graphics y="-0.3058527609287012" x="20.628951953057708" z="0.0"/>
  </node>
  <node id="84810" label="AP5Z1" cy:nodeId="67682">
    <graphics y="195.68014730010646" x="309.49854271233505" z="0.0"/>
  </node>
  <node id="85802" label="DUOX1" cy:nodeId="66690">
    <graphics y="85.75521100555079" x="-142.9208298462587" z="0.0"/>
  </node>
  <node id="84778" label="ADH5" cy:nodeId="67714">
    <graphics y="212.01101125274317" x="277.97229759514755" z="0.0"/>
  </node>
  <node id="85770" label="TKT" cy:nodeId="66722">
    <graphics y="-56.537023415225576" x="260.5631789428038" z="0.0"/>
  </node>
  <node id="84746" label="NOC2L" cy:nodeId="67746">
    <graphics y="183.51555074248927" x="-69.1567688721376" z="0.0"/>
  </node>
  <node id="85738" label="BLNK" cy:nodeId="66754">
    <graphics y="92.91085065398829" x="351.8130568724913" z="0.0"/>
  </node>
  <node id="84714" label="VPS4B" cy:nodeId="67778">
    <graphics y="410.1035405496182" x="-195.99788673102432" z="0.0"/>
  </node>
  <node id="85706" label="MAP2K2" cy:nodeId="66786">
    <graphics y="204.823221335751" x="195.97632591546005" z="0.0"/>
  </node>
  <node id="84682" label="LGALSL" cy:nodeId="67810">
    <graphics y="-268.1522577902256" x="318.62305443108505" z="0.0"/>
  </node>
  <node id="85674" label="ASAH2B" cy:nodeId="66818">
    <graphics y="-43.4285334249912" x="172.26241295159286" z="0.0"/>
  </node>
  <node id="84650" label="ZNF408" cy:nodeId="67842">
    <graphics y="473.2091618875088" x="152.59331505120224" z="0.0"/>
  </node>
  <node id="85642" label="NLRC4" cy:nodeId="66850">
    <graphics y="103.49703420196192" x="138.1548537474913" z="0.0"/>
  </node>
  <node id="84618" label="CDK7" cy:nodeId="67874">
    <graphics y="-208.6939142843662" x="357.3269423705382" z="0.0"/>
  </node>
  <node id="85610" label="JMJD4" cy:nodeId="66882">
    <graphics y="-23.723661293643545" x="-199.6047898071962" z="0.0"/>
  </node>
  <node id="84586" label="SDSL" cy:nodeId="67906">
    <graphics y="-374.0100458761631" x="126.32443992913193" z="0.0"/>
  </node>
  <node id="85578" label="MRPL13" cy:nodeId="66914">
    <graphics y="62.26345838103907" x="303.0433730346007" z="0.0"/>
  </node>
  <node id="84554" label="C9orf116" cy:nodeId="67938">
    <graphics y="-723.40039621796" x="-607.229484631415" z="0.0"/>
  </node>
  <node id="85546" label="INTS5" cy:nodeId="66946">
    <graphics y="-27.26038156952245" x="485.57080833733505" z="0.0"/>
  </node>
  <node id="84522" label="CCDC74B" cy:nodeId="67970">
    <graphics y="-653.1681574484287" x="-452.71617896735245" z="0.0"/>
  </node>
  <node id="85514" label="PSAT1" cy:nodeId="66978">
    <graphics y="96.51941503081935" x="88.16390220940536" z="0.0"/>
  </node>
  <node id="85482" label="CD53" cy:nodeId="67010">
    <graphics y="27.328569541317393" x="790.7587355834288" z="0.0"/>
  </node>
  <node id="85450" label="FLVCR2" cy:nodeId="67042">
    <graphics y="73.08544362579005" x="378.2577590209288" z="0.0"/>
  </node>
  <node id="85418" label="NR2F6" cy:nodeId="67074">
    <graphics y="80.7271119454922" x="72.38539879143661" z="0.0"/>
  </node>
  <node id="85386" label="LAGE3" cy:nodeId="67106">
    <graphics y="74.02866567168849" x="181.71274559319443" z="0.0"/>
  </node>
  <node id="85354" label="SCD" cy:nodeId="67138">
    <graphics y="124.9884358743252" x="-207.39351661383682" z="0.0"/>
  </node>
  <node id="85322" label="FHDC1" cy:nodeId="67170">
    <graphics y="-72.2132013937412" x="-199.60436256110245" z="0.0"/>
  </node>
  <node id="85290" label="STEAP3" cy:nodeId="67202">
    <graphics y="-242.83566843475683" x="-298.0718003052431" z="0.0"/>
  </node>
  <node id="85258" label="GRHL2" cy:nodeId="67234">
    <graphics y="-99.25188242401464" x="-386.4363022583681" z="0.0"/>
  </node>
  <node id="85226" label="RHNO1" cy:nodeId="67266">
    <graphics y="-435.86157785858495" x="-50.01918609320694" z="0.0"/>
  </node>
  <node id="85194" label="COX8A" cy:nodeId="67298">
    <graphics y="336.0682622293057" x="533.6055983763976" z="0.0"/>
  </node>
  <node id="85162" label="TGS1" cy:nodeId="67330">
    <graphics y="182.32807363067286" x="-593.4697800415712" z="0.0"/>
  </node>
  <node id="85130" label="FAM166B" cy:nodeId="67362">
    <graphics y="-842.3380182882725" x="-468.06322486578995" z="0.0"/>
  </node>
  <node id="85098" label="SRCIN1" cy:nodeId="67394">
    <graphics y="-392.4644526144443" x="-444.7399521607118" z="0.0"/>
  </node>
  <node id="85066" label="DBP" cy:nodeId="67426">
    <graphics y="-909.9422052999912" x="-575.5391770142274" z="0.0"/>
  </node>
  <node id="86058" label="FMO5" cy:nodeId="66434">
    <graphics y="361.3781377175869" x="-297.7539902466493" z="0.0"/>
  </node>
  <node id="85034" label="ATOH8" cy:nodeId="67458">
    <graphics y="-56.572484841006826" x="-583.148918225165" z="0.0"/>
  </node>
  <node id="86026" label="EPDR1" cy:nodeId="66466">
    <graphics y="-71.73059641327245" x="-33.359499825830994" z="0.0"/>
  </node>
  <node id="85002" label="ARMC9" cy:nodeId="67490">
    <graphics y="30.13632787261622" x="-107.93061835944229" z="0.0"/>
  </node>
  <node id="85994" label="ANKEF1" cy:nodeId="66498">
    <graphics y="133.27335561309474" x="-92.06898887335831" z="0.0"/>
  </node>
  <node id="84970" label="PSMG1" cy:nodeId="67522">
    <graphics y="-88.90231882538183" x="52.087432788018646" z="0.0"/>
  </node>
  <node id="85962" label="OCIAD2" cy:nodeId="66530">
    <graphics y="3.662500510555674" x="40.16548149407333" z="0.0"/>
  </node>
  <node id="84938" label="POLR1C" cy:nodeId="67554">
    <graphics y="299.95099843536036" x="106.36325828850693" z="0.0"/>
  </node>
  <node id="85929" label="FEM1A" cy:nodeId="66563">
    <graphics y="196.77225698028224" x="-280.22501380621964" z="0.0"/>
  </node>
  <node id="84905" label="PRIM1" cy:nodeId="67587">
    <graphics y="205.091531882626" x="232.7676467162413" z="0.0"/>
  </node>
  <node id="85897" label="C9orf156" cy:nodeId="66595">
    <graphics y="-257.3592280050693" x="0.2905196410459894" z="0.0"/>
  </node>
  <node id="84873" label="RHBDD3" cy:nodeId="67619">
    <graphics y="122.83747685943263" x="-208.57729346930557" z="0.0"/>
  </node>
  <node id="85865" label="PRAM1" cy:nodeId="66627">
    <graphics y="-64.70152842010839" x="150.60401146233505" z="0.0"/>
  </node>
  <node id="84841" label="RPP38" cy:nodeId="67651">
    <graphics y="391.5543767312588" x="-79.94203956305557" z="0.0"/>
  </node>
  <node id="85833" label="MRPS12" cy:nodeId="66659">
    <graphics y="-46.455831398624014" x="50.61112205803818" z="0.0"/>
  </node>
  <node id="84809" label="PSKH1" cy:nodeId="67683">
    <graphics y="-46.33020578827245" x="-313.52489478766495" z="0.0"/>
  </node>
  <node id="85801" label="TRAPPC1" cy:nodeId="66691">
    <graphics y="-126.69385324920995" x="16.84271232903427" z="0.0"/>
  </node>
  <node id="84777" label="NUP35" cy:nodeId="67715">
    <graphics y="539.1810857156338" x="-46.3525982636171" z="0.0"/>
  </node>
  <node id="85769" label="ARHGAP30" cy:nodeId="66723">
    <graphics y="159.79345906768458" x="277.2856215697569" z="0.0"/>
  </node>
  <node id="84745" label="ARSE" cy:nodeId="67747">
    <graphics y="-445.0266779562412" x="20.206458972100677" z="0.0"/>
  </node>
  <node id="85737" label="GIMAP6" cy:nodeId="66755">
    <graphics y="47.86190618072169" x="236.67337791741318" z="0.0"/>
  </node>
  <node id="84713" label="GSKIP" cy:nodeId="67779">
    <graphics y="143.6659718850674" x="459.6062697631163" z="0.0"/>
  </node>
  <node id="85705" label="C11orf1" cy:nodeId="66787">
    <graphics y="211.1477147439541" x="323.4868849974913" z="0.0"/>
  </node>
  <node id="84681" label="PWWP2A" cy:nodeId="67811">
    <graphics y="281.4906560281338" x="370.26258079827255" z="0.0"/>
  </node>
  <node id="85673" label="ITGAM" cy:nodeId="66819">
    <graphics y="205.40067494903224" x="313.6516799193663" z="0.0"/>
  </node>
  <node id="84649" label="SLC27A3" cy:nodeId="67843">
    <graphics y="-116.90793405975683" x="144.62076561272568" z="0.0"/>
  </node>
  <node id="85641" label="ECE2" cy:nodeId="66851">
    <graphics y="-20.4129084249912" x="-3.782791211004792" z="0.0"/>
  </node>
  <node id="84617" label="CYBA" cy:nodeId="67875">
    <graphics y="360.94433034454005" x="453.3141555053038" z="0.0"/>
  </node>
  <node id="85609" label="SPRYD7" cy:nodeId="66883">
    <graphics y="-5.555593361514639" x="179.21323387444443" z="0.0"/>
  </node>
  <node id="84585" label="UBE2L3" cy:nodeId="67907">
    <graphics y="-307.13525949920995" x="-288.78331763922745" z="0.0"/>
  </node>
  <node id="85577" label="LRRC20" cy:nodeId="66915">
    <graphics y="227.18197072539942" x="201.86540977776474" z="0.0"/>
  </node>
  <node id="84553" label="TMEM231" cy:nodeId="67939">
    <graphics y="-742.9820612570225" x="-482.32714088141495" z="0.0"/>
  </node>
  <node id="85545" label="FH" cy:nodeId="66947">
    <graphics y="9.137590537411143" x="-72.57196052252823" z="0.0"/>
  </node>
  <node id="84521" label="IQCC" cy:nodeId="67971">
    <graphics y="-497.62329660858495" x="-498.0961228150087" z="0.0"/>
  </node>
  <node id="85513" label="SPC25" cy:nodeId="66979">
    <graphics y="-25.57591806854589" x="171.72275535881943" z="0.0"/>
  </node>
  <node id="85481" label="SORBS3" cy:nodeId="67011">
    <graphics y="-129.5729883810459" x="363.9176406127257" z="0.0"/>
  </node>
  <node id="85449" label="TMA16" cy:nodeId="67043">
    <graphics y="158.42939199004786" x="-90.22023399054581" z="0.0"/>
  </node>
  <node id="85417" label="SKA1" cy:nodeId="67075">
    <graphics y="422.72826589141505" x="432.2599562865538" z="0.0"/>
  </node>
  <node id="85385" label="CNIH4" cy:nodeId="67107">
    <graphics y="-24.457067360538076" x="52.36668388665146" z="0.0"/>
  </node>
  <node id="85353" label="FAM195A" cy:nodeId="67139">
    <graphics y="358.80163014922755" x="184.0980147582335" z="0.0"/>
  </node>
  <node id="85321" label="ALDH3B1" cy:nodeId="67171">
    <graphics y="-155.23042856659276" x="-284.37393958746964" z="0.0"/>
  </node>
  <node id="85289" label="NUDT16" cy:nodeId="67203">
    <graphics y="-186.64249216522558" x="230.6393508178038" z="0.0"/>
  </node>
  <node id="85257" label="DFFA" cy:nodeId="67235">
    <graphics y="-28.035978188174795" x="-113.51881416022354" z="0.0"/>
  </node>
  <node id="85225" label="PDCD11" cy:nodeId="67267">
    <graphics y="-121.04134165253026" x="-106.08118446051651" z="0.0"/>
  </node>
  <node id="85193" label="STAT3" cy:nodeId="67299">
    <graphics y="-395.39380442108495" x="80.96440117180771" z="0.0"/>
  </node>
  <node id="85161" label="ELK1" cy:nodeId="67331">
    <graphics y="3.340631614071299" x="-287.8101425903993" z="0.0"/>
  </node>
  <node id="85129" label="DNAH10" cy:nodeId="67363">
    <graphics y="-790.5903986593662" x="-452.7638779419618" z="0.0"/>
  </node>
  <node id="85097" label="RABL5" cy:nodeId="67395">
    <graphics y="-492.7503107687412" x="-702.10424049079" z="0.0"/>
  </node>
  <node id="85065" label="TBX4" cy:nodeId="67427">
    <graphics y="-96.16846262420995" x="494.9475783568663" z="0.0"/>
  </node>
  <node id="86057" label="ZWINT" cy:nodeId="66435">
    <graphics y="102.8430558541836" x="120.45680992424911" z="0.0"/>
  </node>
  <node id="85033" label="FOXK1" cy:nodeId="67459">
    <graphics y="-855.3644465109287" x="-539.2939072388368" z="0.0"/>
  </node>
  <node id="86025" label="SKA3" cy:nodeId="66467">
    <graphics y="-64.27939402069433" x="203.18479149163193" z="0.0"/>
  </node>
  <node id="85001" label="ARPC4" cy:nodeId="67491">
    <graphics y="27.750562796932627" x="-130.2587204712587" z="0.0"/>
  </node>
  <node id="85993" label="S1PR4" cy:nodeId="66499">
    <graphics y="102.1130753854336" x="181.24399559319443" z="0.0"/>
  </node>
  <node id="84969" label="XKR8" cy:nodeId="67523">
    <graphics y="256.1922856668057" x="176.28589622796005" z="0.0"/>
  </node>
  <node id="85961" label="MUL1" cy:nodeId="66531">
    <graphics y="63.76687444244044" x="-50.07314880072647" z="0.0"/>
  </node>
  <node id="84937" label="BCS1L" cy:nodeId="67555">
    <graphics y="164.8418294290127" x="78.86686699212021" z="0.0"/>
  </node>
  <node id="85928" label="MID1IP1" cy:nodeId="66564">
    <graphics y="-270.76636301483495" x="-98.81611640631729" z="0.0"/>
  </node>
  <node id="84904" label="ZMAT5" cy:nodeId="67588">
    <graphics y="-46.03233133758886" x="238.53318016350693" z="0.0"/>
  </node>
  <node id="85896" label="ENC1" cy:nodeId="66596">
    <graphics y="165.5225392678799" x="-39.337480618353425" z="0.0"/>
  </node>
  <node id="84872" label="ARHGAP35" cy:nodeId="67620">
    <graphics y="-284.4592951437412" x="219.9080733519835" z="0.0"/>
  </node>
  <node id="85864" label="MYO7A" cy:nodeId="66628">
    <graphics y="244.2616521218838" x="-59.696537091131745" z="0.0"/>
  </node>
  <node id="84840" label="RNMTL1" cy:nodeId="67652">
    <graphics y="-86.93266855682714" x="446.03919212639755" z="0.0"/>
  </node>
  <node id="85832" label="GLB1" cy:nodeId="66660">
    <graphics y="131.99926198516505" x="42.974334643487396" z="0.0"/>
  </node>
  <node id="84808" label="MRPS7" cy:nodeId="67684">
    <graphics y="235.9027196267666" x="-121.74633033453995" z="0.0"/>
  </node>
  <node id="85800" label="WDR81" cy:nodeId="66692">
    <graphics y="495.7540837625088" x="235.06833641350693" z="0.0"/>
  </node>
  <node id="84776" label="TMEM182" cy:nodeId="67716">
    <graphics y="537.99413503204" x="329.0637892943663" z="0.0"/>
  </node>
  <node id="85768" label="YKT6" cy:nodeId="66724">
    <graphics y="-86.10857187713964" x="248.8004836303038" z="0.0"/>
  </node>
  <node id="84744" label="NCMAP" cy:nodeId="67748">
    <graphics y="-151.09616648163183" x="-59.24216659247452" z="0.0"/>
  </node>
  <node id="85736" label="MMP28" cy:nodeId="66756">
    <graphics y="35.42415059600489" x="-159.41871650397354" z="0.0"/>
  </node>
  <node id="84712" label="EMC7" cy:nodeId="67780">
    <graphics y="402.8568364480557" x="-116.0360413330751" z="0.0"/>
  </node>
  <node id="85704" label="IMMT" cy:nodeId="66788">
    <graphics y="188.37816060577052" x="286.22510521233505" z="0.0"/>
  </node>
  <node id="84680" label="PCGF1" cy:nodeId="67812">
    <graphics y="213.82924855743067" x="267.6088637572569" z="0.0"/>
  </node>
  <node id="85672" label="TPD52L2" cy:nodeId="66820">
    <graphics y="50.35912526641505" x="252.18970482171005" z="0.0"/>
  </node>
  <node id="84648" label="LEPREL4" cy:nodeId="67844">
    <graphics y="428.7716618875088" x="348.1716994506163" z="0.0"/>
  </node>
  <node id="85640" label="PKMYT1" cy:nodeId="66852">
    <graphics y="46.351663718563486" x="0.7963370543760675" z="0.0"/>
  </node>
  <node id="84616" label="PPIL1" cy:nodeId="67876">
    <graphics y="22.484144339901377" x="-241.5984421509462" z="0.0"/>
  </node>
  <node id="85608" label="SSR2" cy:nodeId="66884">
    <graphics y="375.0132085183682" x="40.918907092217864" z="0.0"/>
  </node>
  <node id="84584" label="RABL2B" cy:nodeId="67908">
    <graphics y="-508.8904474874912" x="-612.90551002204" z="0.0"/>
  </node>
  <node id="85576" label="DHDDS" cy:nodeId="66916">
    <graphics y="-27.775838722842764" x="150.051994250421" z="0.0"/>
  </node>
  <node id="84552" label="CCDC170" cy:nodeId="67940">
    <graphics y="-469.3840998312412" x="-659.9391403931337" z="0.0"/>
  </node>
  <node id="85544" label="PTK6" cy:nodeId="66948">
    <graphics y="215.10909474883692" x="258.8491591674132" z="0.0"/>
  </node>
  <node id="84520" label="TMEM232" cy:nodeId="67972">
    <graphics y="-488.15955149139745" x="-523.8711472290712" z="0.0"/>
  </node>
  <node id="85512" label="ZSWIM7" cy:nodeId="66980">
    <graphics y="-127.57571970428808" x="-128.15233619391495" z="0.0"/>
  </node>
  <node id="85480" label="LYPLA1" cy:nodeId="67012">
    <graphics y="-137.49204050506933" x="238.0258254271788" z="0.0"/>
  </node>
  <node id="85448" label="ZNF195" cy:nodeId="67044">
    <graphics y="389.18993581329005" x="249.1841506224913" z="0.0"/>
  </node>
  <node id="85416" label="KIF20A" cy:nodeId="67076">
    <graphics y="130.71743215118067" x="-15.786781384344636" z="0.0"/>
  </node>
  <node id="85384" label="PGAM1" cy:nodeId="67108">
    <graphics y="-344.8519953390537" x="412.0322036010069" z="0.0"/>
  </node>
  <node id="85352" label="DPM2" cy:nodeId="67140">
    <graphics y="47.32327092681544" x="-111.38178260504776" z="0.0"/>
  </node>
  <node id="85320" label="TFAP2C" cy:nodeId="67172">
    <graphics y="-228.46570383514745" x="-192.47811134039932" z="0.0"/>
  </node>
  <node id="85288" label="TMEM180" cy:nodeId="67204">
    <graphics y="185.14618886504786" x="-352.04161842047745" z="0.0"/>
  </node>
  <node id="85256" label="GALE" cy:nodeId="67236">
    <graphics y="-20.623983254092764" x="333.0061415892882" z="0.0"/>
  </node>
  <node id="85224" label="PRMT3" cy:nodeId="67268">
    <graphics y="-203.8954523703037" x="280.7725600463194" z="0.0"/>
  </node>
  <node id="85192" label="TFEB" cy:nodeId="67300">
    <graphics y="15.703516135555674" x="-24.630882336493073" z="0.0"/>
  </node>
  <node id="85160" label="HES4" cy:nodeId="67332">
    <graphics y="26.073064933163096" x="-337.1324997681337" z="0.0"/>
  </node>
  <node id="85128" label="C9orf117" cy:nodeId="67364">
    <graphics y="-692.5864924093662" x="-539.5332566040712" z="0.0"/>
  </node>
  <node id="85096" label="NGEF" cy:nodeId="67396">
    <graphics y="-618.10986887421" x="-598.4510422486024" z="0.0"/>
  </node>
  <node id="85064" label="GBX1" cy:nodeId="67428">
    <graphics y="-784.412359108585" x="-391.8156357544618" z="0.0"/>
  </node>
  <node id="86056" label="PLA2G4F" cy:nodeId="66436">
    <graphics y="-276.7294672628818" x="-6.495107724066315" z="0.0"/>
  </node>
  <node id="85032" label="GMEB1" cy:nodeId="67460">
    <graphics y="-88.0065363546787" x="-575.5338669556337" z="0.0"/>
  </node>
  <node id="86024" label="EME1" cy:nodeId="66468">
    <graphics y="97.61081136260646" x="226.81693260491318" z="0.0"/>
  </node>
  <node id="85000" label="SLC12A9" cy:nodeId="67492">
    <graphics y="69.00487149749415" x="275.2236098510069" z="0.0"/>
  </node>
  <node id="85992" label="YIF1A" cy:nodeId="66500">
    <graphics y="-7.953374733584951" x="122.0064162474913" z="0.0"/>
  </node>
  <node id="84968" label="LCMT2" cy:nodeId="67524">
    <graphics y="-165.59880625213964" x="-1.0071335571961981" z="0.0"/>
  </node>
  <node id="85960" label="MRPS34" cy:nodeId="66532">
    <graphics y="241.28876699004786" x="-15.50775916754776" z="0.0"/>
  </node>
  <node id="84936" label="LRRC47" cy:nodeId="67556">
    <graphics y="141.12877858672755" x="290.4190139037413" z="0.0"/>
  </node>
  <node id="85927" label="MLST8" cy:nodeId="66565">
    <graphics y="202.67269338164942" x="176.77689354241318" z="0.0"/>
  </node>
  <node id="84903" label="NKX2-1" cy:nodeId="67589">
    <graphics y="-204.60727488006933" x="-295.87242896735245" z="0.0"/>
  </node>
  <node id="85895" label="GSTZ1" cy:nodeId="66597">
    <graphics y="231.15218556914942" x="162.03208153069443" z="0.0"/>
  </node>
  <node id="84871" label="MSRB1" cy:nodeId="67621">
    <graphics y="-33.8467463156162" x="566.60913841546" z="0.0"/>
  </node>
  <node id="85863" label="DCAF13" cy:nodeId="66629">
    <graphics y="102.81423963103907" x="109.49568931878036" z="0.0"/>
  </node>
  <node id="84839" label="PAXIP1" cy:nodeId="67653">
    <graphics y="69.53137410674708" x="399.7414931517882" z="0.0"/>
  </node>
  <node id="85831" label="FBXO41" cy:nodeId="66661">
    <graphics y="229.45185292754786" x="324.5308608275694" z="0.0"/>
  </node>
  <node id="84807" label="ARRB1" cy:nodeId="67685">
    <graphics y="-54.2256525656162" x="384.93140404046005" z="0.0"/>
  </node>
  <node id="85799" label="SPHK2" cy:nodeId="66693">
    <graphics y="0.4997502664150488" x="19.722030566338958" z="0.0"/>
  </node>
  <node id="84775" label="IPP" cy:nodeId="67717">
    <graphics y="-358.5298823019443" x="167.81922142327255" z="0.0"/>
  </node>
  <node id="85767" label="SDC1" cy:nodeId="66725">
    <graphics y="161.83824361358302" x="-303.0474167603212" z="0.0"/>
  </node>
  <node id="84743" label="TENC1" cy:nodeId="67749">
    <graphics y="401.5158940652432" x="163.13030235588974" z="0.0"/>
  </node>
  <node id="85735" label="CISD2" cy:nodeId="66757">
    <graphics y="-25.778600563663076" x="-43.89954383551651" z="0.0"/>
  </node>
  <node id="84711" label="SIAE" cy:nodeId="67781">
    <graphics y="282.68732656036036" x="-204.826423718329" z="0.0"/>
  </node>
  <node id="85703" label="MS4A4A" cy:nodeId="66789">
    <graphics y="46.513839850765635" x="-109.23664100348526" z="0.0"/>
  </node>
  <node id="84679" label="CDK4" cy:nodeId="67813">
    <graphics y="174.42267812286036" x="235.97986595452255" z="0.0"/>
  </node>
  <node id="85671" label="BRAT1" cy:nodeId="66821">
    <graphics y="26.6428777078213" x="28.105659411553802" z="0.0"/>
  </node>
  <node id="84647" label="FOXA1" cy:nodeId="67845">
    <graphics y="-267.2960566183506" x="-159.74217994391495" z="0.0"/>
  </node>
  <node id="85639" label="SNX30" cy:nodeId="66853">
    <graphics y="29.73504842315333" x="-217.93221290289932" z="0.0"/>
  </node>
  <node id="84615" label="ACAD8" cy:nodeId="67877">
    <graphics y="39.64820302520411" x="-401.4589157837587" z="0.0"/>
  </node>
  <node id="85607" label="ACP5" cy:nodeId="66885">
    <graphics y="-165.30791269745214" x="-3.9913826721864325" z="0.0"/>
  </node>
  <node id="84583" label="ANKRD54" cy:nodeId="67909">
    <graphics y="-675.4524592062412" x="-367.2267685669618" z="0.0"/>
  </node>
  <node id="85575" label="TMED1" cy:nodeId="66917">
    <graphics y="233.14675344024317" x="-203.53295142828995" z="0.0"/>
  </node>
  <node id="84551" label="C16orf93" cy:nodeId="67941">
    <graphics y="-424.9267328878818" x="-531.1199875611024" z="0.0"/>
  </node>
  <node id="85543" label="SLC25A20" cy:nodeId="66949">
    <graphics y="-29.06128488983495" x="139.8357619506163" z="0.0"/>
  </node>
  <node id="84519" label="RTDR1" cy:nodeId="67973">
    <graphics y="-726.2313288351475" x="-612.3091355103212" z="0.0"/>
  </node>
  <node id="85511" label="HSD17B4" cy:nodeId="66981">
    <graphics y="45.46907628570216" x="-52.72556121527725" z="0.0"/>
  </node>
  <node id="85479" label="RBBP4" cy:nodeId="67013">
    <graphics y="264.03075612579005" x="-145.3523712891298" z="0.0"/>
  </node>
  <node id="85447" label="CLN3" cy:nodeId="67045">
    <graphics y="109.31173528228419" x="-28.715981079931794" z="0.0"/>
  </node>
  <node id="85415" label="FIBP" cy:nodeId="67077">
    <graphics y="-113.62584482635839" x="-14.52878196417862" z="0.0"/>
  </node>
  <node id="85383" label="TUBA1C" cy:nodeId="67109">
    <graphics y="191.73581136260646" x="-58.499889447088776" z="0.0"/>
  </node>
  <node id="85351" label="RPH3AL" cy:nodeId="67141">
    <graphics y="75.18387712035792" x="133.12558739006943" z="0.0"/>
  </node>
  <node id="85319" label="C19orf10" cy:nodeId="67173">
    <graphics y="164.9672185281338" x="562.0482253295226" z="0.0"/>
  </node>
  <node id="85287" label="FASN" cy:nodeId="67205">
    <graphics y="-146.6379297872959" x="23.690311358575286" z="0.0"/>
  </node>
  <node id="85255" label="TSPYL5" cy:nodeId="67237">
    <graphics y="-263.6742304464756" x="367.7357863646788" z="0.0"/>
  </node>
  <node id="85223" label="TIMM8B" cy:nodeId="67269">
    <graphics y="-161.164327492374" x="496.80164329827255" z="0.0"/>
  </node>
  <node id="85191" label="ZBTB42" cy:nodeId="67301">
    <graphics y="-82.38966928924901" x="-189.24462135016495" z="0.0"/>
  </node>
  <node id="85159" label="HES5" cy:nodeId="67333">
    <graphics y="-119.59924875702245" x="-389.8980942505556" z="0.0"/>
  </node>
  <node id="85127" label="GRIN3B" cy:nodeId="67365">
    <graphics y="-682.5703791281162" x="-459.1771775025087" z="0.0"/>
  </node>
  <node id="85095" label="E2F8" cy:nodeId="67397">
    <graphics y="-520.7788752218662" x="-403.0371933716493" z="0.0"/>
  </node>
  <node id="85063" label="NFYC" cy:nodeId="67429">
    <graphics y="-324.70960031952245" x="-67.05849464118057" z="0.0"/>
  </node>
  <node id="86055" label="SNX25" cy:nodeId="66437">
    <graphics y="-12.807180275577139" x="-235.01010902106339" z="0.0"/>
  </node>
  <node id="85031" label="KMT2A" cy:nodeId="67461">
    <graphics y="-938.6382502218662" x="-789.0597458618837" z="0.0"/>
  </node>
  <node id="86023" label="AIFM1" cy:nodeId="66469">
    <graphics y="173.4707814553799" x="83.40266411126083" z="0.0"/>
  </node>
  <node id="84999" label="MRPL46" cy:nodeId="67493">
    <graphics y="347.8951970437588" x="474.0466994506163" z="0.0"/>
  </node>
  <node id="85991" label="TMED3" cy:nodeId="66501">
    <graphics y="9.96444524322169" x="65.19142906487411" z="0.0"/>
  </node>
  <node id="84967" label="GLTPD1" cy:nodeId="67525">
    <graphics y="372.3694096902432" x="345.19763939202255" z="0.0"/>
  </node>
  <node id="85959" label="AP1S1" cy:nodeId="66533">
    <graphics y="187.15905202422755" x="152.226554797296" z="0.0"/>
  </node>
  <node id="84935" label="TADA3" cy:nodeId="67557">
    <graphics y="183.05357564483302" x="309.8335952025694" z="0.0"/>
  </node>
  <node id="85926" label="LSS" cy:nodeId="66566">
    <graphics y="201.93622792754786" x="-9.513752056952058" z="0.0"/>
  </node>
  <node id="84902" label="EMC1" cy:nodeId="67590">
    <graphics y="-232.1127375265537" x="142.58338157952255" z="0.0"/>
  </node>
  <node id="85894" label="MACROD2" cy:nodeId="66598">
    <graphics y="32.29632772002833" x="-311.2549362915712" z="0.0"/>
  </node>
  <node id="84870" label="MRPS18A" cy:nodeId="67622">
    <graphics y="383.66503346954005" x="351.3382338744444" z="0.0"/>
  </node>
  <node id="85862" label="SF3B5" cy:nodeId="66630">
    <graphics y="-178.0691584249912" x="109.30602257073349" z="0.0"/>
  </node>
  <node id="84838" label="TRMT61B" cy:nodeId="67654">
    <graphics y="398.3781377175869" x="20.137988970879974" z="0.0"/>
  </node>
  <node id="85830" label="GPX1" cy:nodeId="66662">
    <graphics y="348.9127751687588" x="-129.03836829840714" z="0.0"/>
  </node>
  <node id="84806" label="GTF2E1" cy:nodeId="67686">
    <graphics y="579.4298955300869" x="15.945335314874114" z="0.0"/>
  </node>
  <node id="85798" label="IRX2" cy:nodeId="66694">
    <graphics y="-51.303563942569326" x="-272.5439987915712" z="0.0"/>
  </node>
  <node id="84774" label="ASB6" cy:nodeId="67718">
    <graphics y="-40.42980753387792" x="400.1803969603819" z="0.0"/>
  </node>
  <node id="85766" label="TMEM92" cy:nodeId="66726">
    <graphics y="-390.7816523214756" x="114.84297935784286" z="0.0"/>
  </node>
  <node id="84742" label="XRCC2" cy:nodeId="67750">
    <graphics y="455.6119939187588" x="69.6985549193663" z="0.0"/>
  </node>
  <node id="85734" label="MPI" cy:nodeId="66758">
    <graphics y="145.60531819854396" x="-70.02486427008682" z="0.0"/>
  </node>
  <node id="84710" label="ZNF135" cy:nodeId="67782">
    <graphics y="254.00837148223536" x="-166.20249183356339" z="0.0"/>
  </node>
  <node id="85702" label="TACO1" cy:nodeId="66790">
    <graphics y="32.71728719268458" x="139.20333092034286" z="0.0"/>
  </node>
  <node id="84678" label="ST6GALNAC4" cy:nodeId="67814">
    <graphics y="-110.50435434784276" x="22.925994799737396" z="0.0"/>
  </node>
  <node id="85670" label="SLC25A15" cy:nodeId="66822">
    <graphics y="46.89050496612208" x="377.0582045775694" z="0.0"/>
  </node>
  <node id="84646" label="VWA1" cy:nodeId="67846">
    <graphics y="385.2944585183682" x="-155.03027351080948" z="0.0"/>
  </node>
  <node id="85638" label="PBK" cy:nodeId="66854">
    <graphics y="436.5050908425869" x="-115.16193397223526" z="0.0"/>
  </node>
  <node id="84614" label="IFT57" cy:nodeId="67878">
    <graphics y="125.0493718484463" x="-497.3839951294618" z="0.0"/>
  </node>
  <node id="85606" label="EXOSC4" cy:nodeId="66886">
    <graphics y="28.814199576717783" x="413.1707228881163" z="0.0"/>
  </node>
  <node id="84582" label="XYLT2" cy:nodeId="67910">
    <graphics y="643.6116887429775" x="296.4791640502257" z="0.0"/>
  </node>
  <node id="85574" label="UQCC2" cy:nodeId="66918">
    <graphics y="58.38977063689845" x="-5.5581246155458075" z="0.0"/>
  </node>
  <node id="84550" label="ARX" cy:nodeId="67942">
    <graphics y="-630.7180842062412" x="-604.2728806275087" z="0.0"/>
  </node>
  <node id="85542" label="SDHC" cy:nodeId="66950">
    <graphics y="72.13548673186915" x="-30.31238086401993" z="0.0"/>
  </node>
  <node id="84518" label="NEK10" cy:nodeId="67974">
    <graphics y="-760.8839777609287" x="-506.5364609497743" z="0.0"/>
  </node>
  <node id="85510" label="LAMTOR1" cy:nodeId="66982">
    <graphics y="223.14823354278224" x="169.1602706176085" z="0.0"/>
  </node>
  <node id="85478" label="EHHADH" cy:nodeId="67014">
    <graphics y="-200.37927805389745" x="333.2056349974913" z="0.0"/>
  </node>
  <node id="85446" label="PALB2" cy:nodeId="67046">
    <graphics y="-28.181661476749014" x="142.12368004143661" z="0.0"/>
  </node>
  <node id="85414" label="SLC39A11" cy:nodeId="67078">
    <graphics y="148.22973836455958" x="-37.84263189017349" z="0.0"/>
  </node>
  <node id="85382" label="TANGO2" cy:nodeId="67110">
    <graphics y="236.38700307403224" x="-9.262855603094636" z="0.0"/>
  </node>
  <node id="85350" label="CTDNEP1" cy:nodeId="67142">
    <graphics y="-211.3665217062412" x="-77.21287162482315" z="0.0"/>
  </node>
  <node id="85318" label="PEPD" cy:nodeId="67174">
    <graphics y="-338.3509272238193" x="-28.82736594855362" z="0.0"/>
  </node>
  <node id="85286" label="SERINC2" cy:nodeId="67206">
    <graphics y="-180.8653010031162" x="-154.75388343512589" z="0.0"/>
  </node>
  <node id="85254" label="ARL11" cy:nodeId="67238">
    <graphics y="-246.28336130585058" x="-232.18146522223526" z="0.0"/>
  </node>
  <node id="85222" label="TP53" cy:nodeId="67270">
    <graphics y="255.42128957305567" x="353.48926536858505" z="0.0"/>
  </node>
  <node id="85190" label="PTK7" cy:nodeId="67302">
    <graphics y="-244.98184763397558" x="435.04492943108505" z="0.0"/>
  </node>
  <node id="85158" label="HES7" cy:nodeId="67334">
    <graphics y="2.3282338479580176" x="-340.9186325806337" z="0.0"/>
  </node>
  <node id="85126" label="NPHP1" cy:nodeId="67366">
    <graphics y="-705.2378595968662" x="-418.70055396735245" z="0.0"/>
  </node>
  <node id="85094" label="SLC52A1" cy:nodeId="67398">
    <graphics y="-785.31104074921" x="-663.126457287665" z="0.0"/>
  </node>
  <node id="85062" label="NFYB" cy:nodeId="67430">
    <graphics y="-133.0110987326084" x="-518.51732642829" z="0.0"/>
  </node>
  <node id="86054" label="FAM111B" cy:nodeId="66438">
    <graphics y="183.3622609475674" x="12.82235328972763" z="0.0"/>
  </node>
  <node id="85030" label="TBX20" cy:nodeId="67462">
    <graphics y="-795.5838068624912" x="-865.20677955329" z="0.0"/>
  </node>
  <node id="86022" label="OIP5" cy:nodeId="66470">
    <graphics y="84.32074941192286" x="-207.10053260504776" z="0.0"/>
  </node>
  <node id="84998" label="CBS" cy:nodeId="67494">
    <graphics y="44.098184714657236" x="-28.08449943244034" z="0.0"/>
  </node>
  <node id="85990" label="CCDC71" cy:nodeId="66502">
    <graphics y="283.34171498809474" x="43.99869530022568" z="0.0"/>
  </node>
  <node id="84966" label="DFFB" cy:nodeId="67526">
    <graphics y="222.32665456329005" x="311.33142845452255" z="0.0"/>
  </node>
  <node id="85958" label="C1QBP" cy:nodeId="66534">
    <graphics y="241.7512761453213" x="50.544578478936614" z="0.0"/>
  </node>
  <node id="84934" label="SIRT2" cy:nodeId="67558">
    <graphics y="339.1359197000088" x="413.0531996947569" z="0.0"/>
  </node>
  <node id="85925" label="MFAP3L" cy:nodeId="66567">
    <graphics y="197.7308141091885" x="-417.9840927857118" z="0.0"/>
  </node>
  <node id="84901" label="TSN" cy:nodeId="67591">
    <graphics y="-377.2246760031162" x="243.51120750725693" z="0.0"/>
  </node>
  <node id="85893" label="COPE" cy:nodeId="66599">
    <graphics y="176.85925496612208" x="50.740020678643646" z="0.0"/>
  </node>
  <node id="84869" label="TRIAP1" cy:nodeId="67623">
    <graphics y="180.38676656280177" x="443.8306349974913" z="0.0"/>
  </node>
  <node id="85861" label="FAM86C1" cy:nodeId="66631">
    <graphics y="116.72030461822169" x="-92.28794868170792" z="0.0"/>
  </node>
  <node id="84837" label="TRMT12" cy:nodeId="67655">
    <graphics y="134.58895314727442" x="248.23215477288193" z="0.0"/>
  </node>
  <node id="85829" label="MRPS27" cy:nodeId="66663">
    <graphics y="96.02640737090724" x="293.9529799681944" z="0.0"/>
  </node>
  <node id="84805" label="SEC61A1" cy:nodeId="67687">
    <graphics y="-180.41260324920995" x="315.7349623900694" z="0.0"/>
  </node>
  <node id="85797" label="TMEM222" cy:nodeId="66695">
    <graphics y="323.6102849343838" x="-38.82497508704239" z="0.0"/>
  </node>
  <node id="84773" label="SH3BP5L" cy:nodeId="67719">
    <graphics y="587.77050221954" x="389.8448256713194" z="0.0"/>
  </node>
  <node id="85765" label="ATP13A2" cy:nodeId="66727">
    <graphics y="383.1579228738369" x="86.77612297356552" z="0.0"/>
  </node>
  <node id="84741" label="IRF2BP1" cy:nodeId="67751">
    <graphics y="-207.67676340545995" x="52.13915245354599" z="0.0"/>
  </node>
  <node id="85733" label="PCCB" cy:nodeId="66759">
    <graphics y="15.51721395049708" x="59.43311302483505" z="0.0"/>
  </node>
  <node id="84709" label="MFSD1" cy:nodeId="67783">
    <graphics y="227.5713445046963" x="526.555671618585" z="0.0"/>
  </node>
  <node id="85701" label="ST14" cy:nodeId="66791">
    <graphics y="80.52363027129786" x="-4.779796673651276" z="0.0"/>
  </node>
  <node id="84677" label="PSMB7" cy:nodeId="67815">
    <graphics y="231.4087468484463" x="633.7950515013976" z="0.0"/>
  </node>
  <node id="85669" label="TMEM106A" cy:nodeId="66823">
    <graphics y="326.2073613503994" x="117.43508140862411" z="0.0"/>
  </node>
  <node id="84645" label="DOK4" cy:nodeId="67847">
    <graphics y="58.81711400542872" x="-350.1318894165712" z="0.0"/>
  </node>
  <node id="85637" label="ALOX5AP" cy:nodeId="66855">
    <graphics y="-79.15601145233495" x="-26.778961254950104" z="0.0"/>
  </node>
  <node id="84613" label="PIP4K2C" cy:nodeId="67879">
    <graphics y="-157.8198908468662" x="-408.1671982544618" z="0.0"/>
  </node>
  <node id="85605" label="PGAM5" cy:nodeId="66887">
    <graphics y="281.2609197000088" x="-20.78511626898819" z="0.0"/>
  </node>
  <node id="84581" label="LYPLA2" cy:nodeId="67911">
    <graphics y="512.7701970437588" x="183.41402427971786" z="0.0"/>
  </node>
  <node id="85573" label="CHPF2" cy:nodeId="66919">
    <graphics y="307.74701894317286" x="-35.461464001532136" z="0.0"/>
  </node>
  <node id="84549" label="EFCAB10" cy:nodeId="67943">
    <graphics y="-838.7247980734287" x="-487.7427597778993" z="0.0"/>
  </node>
  <node id="85541" label="AURKAIP1" cy:nodeId="66951">
    <graphics y="-66.86987863983495" x="300.5999221068663" z="0.0"/>
  </node>
  <node id="84517" label="CDS1" cy:nodeId="67975">
    <graphics y="-427.30676828827245" x="-565.6443405884462" z="0.0"/>
  </node>
  <node id="85509" label="CYB5A" cy:nodeId="66983">
    <graphics y="-510.90833078827245" x="7.166999743585052" z="0.0"/>
  </node>
  <node id="85477" label="TMEM147" cy:nodeId="67015">
    <graphics y="305.49848378692286" x="76.60564415276474" z="0.0"/>
  </node>
  <node id="85445" label="ARL1" cy:nodeId="67047">
    <graphics y="384.2227116921963" x="-244.540535046454" z="0.0"/>
  </node>
  <node id="85413" label="NUP37" cy:nodeId="67079">
    <graphics y="-418.1810053488193" x="299.51380150139755" z="0.0"/>
  </node>
  <node id="85381" label="RHOBTB2" cy:nodeId="67111">
    <graphics y="62.66592229400294" x="90.91440574944443" z="0.0"/>
  </node>
  <node id="85349" label="GPT2" cy:nodeId="67143">
    <graphics y="13.146165976864268" x="48.89118950188583" z="0.0"/>
  </node>
  <node id="85317" label="NAGLU" cy:nodeId="67175">
    <graphics y="273.9593602517666" x="-248.69924171149307" z="0.0"/>
  </node>
  <node id="85285" label="ADORA2B" cy:nodeId="67207">
    <graphics y="-6.44695841278417" x="-478.4932480591493" z="0.0"/>
  </node>
  <node id="85253" label="MRPS16" cy:nodeId="67239">
    <graphics y="-87.73987375702245" x="60.82618706047958" z="0.0"/>
  </node>
  <node id="85221" label="PSMB2" cy:nodeId="67271">
    <graphics y="-288.6970575949131" x="490.98072044671005" z="0.0"/>
  </node>
  <node id="85189" label="EMC3" cy:nodeId="67303">
    <graphics y="-207.33911692108495" x="-103.31506354987198" z="0.0"/>
  </node>
  <node id="85157" label="ZBTB1" cy:nodeId="67335">
    <graphics y="-294.0943964621006" x="-435.9311753052431" z="0.0"/>
  </node>
  <node id="85125" label="WDR54" cy:nodeId="67367">
    <graphics y="-551.73389231171" x="-647.0812302368837" z="0.0"/>
  </node>
  <node id="85093" label="CCDC13" cy:nodeId="67399">
    <graphics y="-747.11084543671" x="-486.1339646118837" z="0.0"/>
  </node>
  <node id="85061" label="TFE3" cy:nodeId="67431">
    <graphics y="12.673261771542002" x="-240.6385575073915" z="0.0"/>
  </node>
  <node id="86053" label="CCNB1" cy:nodeId="66439">
    <graphics y="42.475496421200205" x="84.83094017327255" z="0.0"/>
  </node>
  <node id="85029" label="MSX1" cy:nodeId="67463">
    <graphics y="-896.2981928488193" x="1111.7838515502258" z="0.0"/>
  </node>
  <node id="86021" label="AGPAT2" cy:nodeId="66471">
    <graphics y="-20.0514582296787" x="-325.9459458130556" z="0.0"/>
  </node>
  <node id="84997" label="PARN" cy:nodeId="67495">
    <graphics y="-125.82909189667089" x="-275.8182144898134" z="0.0"/>
  </node>
  <node id="85989" label="SLC39A8" cy:nodeId="66503">
    <graphics y="115.88659108672755" x="84.73240654290146" z="0.0"/>
  </node>
  <node id="84965" label="C3orf33" cy:nodeId="67527">
    <graphics y="211.56351674590724" x="350.8701552611632" z="0.0"/>
  </node>
  <node id="85957" label="LMAN2" cy:nodeId="66535">
    <graphics y="157.0835744241299" x="-45.88537414252335" z="0.0"/>
  </node>
  <node id="84933" label="AASDH" cy:nodeId="67559">
    <graphics y="-201.19458567108495" x="306.4119033080382" z="0.0"/>
  </node>
  <node id="85924" label="PTCD1" cy:nodeId="66568">
    <graphics y="346.4241277078213" x="79.06798546135849" z="0.0"/>
  </node>
  <node id="84900" label="SLCO2B1" cy:nodeId="67592">
    <graphics y="416.77196706329005" x="-92.22283942877823" z="0.0"/>
  </node>
  <node id="85892" label="FUT3" cy:nodeId="66600">
    <graphics y="191.7467137673916" x="176.15592186272568" z="0.0"/>
  </node>
  <node id="84868" label="DBT" cy:nodeId="67624">
    <graphics y="-87.23038279022558" x="-283.02802283942276" z="0.0"/>
  </node>
  <node id="85860" label="MYD88" cy:nodeId="66632">
    <graphics y="152.08695424590724" x="142.60341636956161" z="0.0"/>
  </node>
  <node id="84836" label="PIGW" cy:nodeId="67656">
    <graphics y="-71.30505930389745" x="318.94495384514755" z="0.0"/>
  </node>
  <node id="85828" label="ESRP2" cy:nodeId="66664">
    <graphics y="48.794811377865244" x="250.43790428460068" z="0.0"/>
  </node>
  <node id="84804" label="TXNDC9" cy:nodeId="67688">
    <graphics y="130.2193280557217" x="-6.26463515936905" z="0.0"/>
  </node>
  <node id="85796" label="PPP1CA" cy:nodeId="66696">
    <graphics y="89.19538701568263" x="280.5572280150694" z="0.0"/>
  </node>
  <node id="84772" label="COQ3" cy:nodeId="67720">
    <graphics y="-232.41663156952245" x="402.8265761596007" z="0.0"/>
  </node>
  <node id="85764" label="MECR" cy:nodeId="66728">
    <graphics y="-17.954076637881826" x="-82.75370032965714" z="0.0"/>
  </node>
  <node id="84740" label="MRPL54" cy:nodeId="67752">
    <graphics y="540.1180058816494" x="285.6129531127257" z="0.0"/>
  </node>
  <node id="85732" label="NFS1" cy:nodeId="66760">
    <graphics y="-13.334302773135732" x="255.6902541381163" z="0.0"/>
  </node>
  <node id="84708" label="LYPLAL1" cy:nodeId="67784">
    <graphics y="55.614996085506846" x="638.5844191771788" z="0.0"/>
  </node>
  <node id="85700" label="ACBD6" cy:nodeId="66792">
    <graphics y="3.9428807595791113" x="398.4739455443663" z="0.0"/>
  </node>
  <node id="84676" label="DHCR24" cy:nodeId="67816">
    <graphics y="158.9382420877041" x="-295.1861801880556" z="0.0"/>
  </node>
  <node id="85668" label="TBXAS1" cy:nodeId="66824">
    <graphics y="392.4976445535244" x="-50.657501294012604" z="0.0"/>
  </node>
  <node id="84644" label="ACVRL1" cy:nodeId="67848">
    <graphics y="533.6603642800869" x="219.73845665276474" z="0.0"/>
  </node>
  <node id="85636" label="SNF8" cy:nodeId="66856">
    <graphics y="-58.085119118350576" x="41.77294914544052" z="0.0"/>
  </node>
  <node id="84612" label="GYG2" cy:nodeId="67880">
    <graphics y="-416.7423456808506" x="-441.0587387818056" z="0.0"/>
  </node>
  <node id="85604" label="EXOSC1" cy:nodeId="66888">
    <graphics y="14.63812459502833" x="289.8864516478819" z="0.0"/>
  </node>
  <node id="84580" label="C3orf18" cy:nodeId="67912">
    <graphics y="585.0679265359463" x="29.068599627618255" z="0.0"/>
  </node>
  <node id="85572" label="FRAT1" cy:nodeId="66920">
    <graphics y="316.8068181375088" x="-224.28147132575089" z="0.0"/>
  </node>
  <node id="84548" label="MAT1A" cy:nodeId="67944">
    <graphics y="-834.8688410421787" x="-529.0428086060243" z="0.0"/>
  </node>
  <node id="85540" label="MRPL19" cy:nodeId="66952">
    <graphics y="243.08686269317286" x="376.9561232787413" z="0.0"/>
  </node>
  <node id="84516" label="VSTM2L" cy:nodeId="67976">
    <graphics y="-518.61621653046" x="-555.1312180298524" z="0.0"/>
  </node>
  <node id="85508" label="MRPL37" cy:nodeId="66984">
    <graphics y="177.21080983672755" x="206.00534813225693" z="0.0"/>
  </node>
  <node id="85476" label="PGLS" cy:nodeId="67016">
    <graphics y="-250.8709162374912" x="172.43271629631943" z="0.0"/>
  </node>
  <node id="85444" label="EIF2AK1" cy:nodeId="67048">
    <graphics y="-158.77400766815526" x="-78.52811439215714" z="0.0"/>
  </node>
  <node id="85412" label="CNP" cy:nodeId="67080">
    <graphics y="184.95091451202052" x="342.5409316283507" z="0.0"/>
  </node>
  <node id="85380" label="XRCC4" cy:nodeId="67112">
    <graphics y="-139.782247414249" x="169.6455764037413" z="0.0"/>
  </node>
  <node id="85348" label="MLXIPL" cy:nodeId="67144">
    <graphics y="-268.17908274139745" x="-203.30844886481339" z="0.0"/>
  </node>
  <node id="85316" label="URM1" cy:nodeId="67176">
    <graphics y="76.87503446136134" x="387.09143822014755" z="0.0"/>
  </node>
  <node id="85284" label="MTRR" cy:nodeId="67208">
    <graphics y="-254.9636896749912" x="-104.90482337653214" z="0.0"/>
  </node>
  <node id="85252" label="HMGB3" cy:nodeId="67240">
    <graphics y="-311.7455805441318" x="-332.9377976196962" z="0.0"/>
  </node>
  <node id="85220" label="ZW10" cy:nodeId="67272">
    <graphics y="-111.9113215109287" x="367.5022353392882" z="0.0"/>
  </node>
  <node id="85188" label="PRIM2" cy:nodeId="67304">
    <graphics y="-338.4634150167881" x="186.59278099358505" z="0.0"/>
  </node>
  <node id="85156" label="ELF3" cy:nodeId="67336">
    <graphics y="110.35431874786036" x="23.12015144646591" z="0.0"/>
  </node>
  <node id="85124" label="PPAP2C" cy:nodeId="67368">
    <graphics y="-581.3998469015537" x="-518.7648545044618" z="0.0"/>
  </node>
  <node id="85092" label="FAM227A" cy:nodeId="67400">
    <graphics y="-598.3037775656162" x="-435.7210922974306" z="0.0"/>
  </node>
  <node id="85060" label="E2F5" cy:nodeId="67432">
    <graphics y="-126.04227243866308" x="-357.1832810181337" z="0.0"/>
  </node>
  <node id="86052" label="CCT3" cy:nodeId="66440">
    <graphics y="-6.089635719913076" x="64.71382133782333" z="0.0"/>
  </node>
  <node id="85028" label="CAMK2N1" cy:nodeId="67464">
    <graphics y="-839.737066139835" x="978.875724719171" z="0.0"/>
  </node>
  <node id="86020" label="AAR2" cy:nodeId="66472">
    <graphics y="55.84627927337306" x="-185.26461036383682" z="0.0"/>
  </node>
  <node id="84996" label="SMAD6" cy:nodeId="67496">
    <graphics y="109.81662953887599" x="162.80974571526474" z="0.0"/>
  </node>
  <node id="85988" label="BDH1" cy:nodeId="66504">
    <graphics y="230.0160466531338" x="247.10428612053818" z="0.0"/>
  </node>
  <node id="84964" label="FBXW5" cy:nodeId="67528">
    <graphics y="18.473013053280283" x="109.2837599974913" z="0.0"/>
  </node>
  <node id="85956" label="TMEM69" cy:nodeId="66536">
    <graphics y="-3.862394203799795" x="-58.039608075018464" z="0.0"/>
  </node>
  <node id="84932" label="NEURL4" cy:nodeId="67560">
    <graphics y="-42.446264137881826" x="-118.04550941168839" z="0.0"/>
  </node>
  <node id="85923" label="C19orf48" cy:nodeId="66569">
    <graphics y="116.17949117217677" x="246.48584739983505" z="0.0"/>
  </node>
  <node id="84899" label="KIAA0196" cy:nodeId="67593">
    <graphics y="192.01825917754786" x="94.72666160881943" z="0.0"/>
  </node>
  <node id="85891" label="THNSL1" cy:nodeId="66601">
    <graphics y="197.15387929473536" x="116.46413414299911" z="0.0"/>
  </node>
  <node id="84867" label="NIP7" cy:nodeId="67625">
    <graphics y="22.12033666167872" x="-295.8653183716493" z="0.0"/>
  </node>
  <node id="85859" label="CCDC167" cy:nodeId="66633">
    <graphics y="195.1928807595791" x="103.23166649163193" z="0.0"/>
  </node>
  <node id="84835" label="POP1" cy:nodeId="67657">
    <graphics y="39.88739980254786" x="413.0137404662413" z="0.0"/>
  </node>
  <node id="85827" label="KDELR1" cy:nodeId="66665">
    <graphics y="-69.15259348358495" x="516.9350051146788" z="0.0"/>
  </node>
  <node id="84803" label="CRELD2" cy:nodeId="67689">
    <graphics y="-446.6179865499912" x="197.8198928099913" z="0.0"/>
  </node>
  <node id="85795" label="PET112" cy:nodeId="66697">
    <graphics y="-118.86537729706151" x="143.53118126213974" z="0.0"/>
  </node>
  <node id="84771" label="WDR3" cy:nodeId="67721">
    <graphics y="22.6461736062588" x="472.25147239983505" z="0.0"/>
  </node>
  <node id="85763" label="VPS11" cy:nodeId="66729">
    <graphics y="271.1836797097744" x="-283.8715134400087" z="0.0"/>
  </node>
  <node id="84739" label="C6orf223" cy:nodeId="67753">
    <graphics y="-419.9812372824131" x="175.76918785393661" z="0.0"/>
  </node>
  <node id="85731" label="FAH" cy:nodeId="66761">
    <graphics y="501.6720219949307" x="-54.65647323309952" z="0.0"/>
  </node>
  <node id="84707" label="USP40" cy:nodeId="67785">
    <graphics y="96.18650640044825" x="697.5363234740538" z="0.0"/>
  </node>
  <node id="85699" label="PTCD2" cy:nodeId="66793">
    <graphics y="-64.67870127167089" x="276.0001906615538" z="0.0"/>
  </node>
  <node id="84675" label="TOX" cy:nodeId="67817">
    <graphics y="140.65321553741114" x="91.53694145501083" z="0.0"/>
  </node>
  <node id="85667" label="METTL1" cy:nodeId="66825">
    <graphics y="-133.03116404022558" x="-0.6142769592958075" z="0.0"/>
  </node>
  <node id="84643" label="SOX9" cy:nodeId="67849">
    <graphics y="485.3241521218838" x="-69.75765617072159" z="0.0"/>
  </node>
  <node id="85635" label="PXMP4" cy:nodeId="66857">
    <graphics y="-5.580427040713857" x="123.19240562737411" z="0.0"/>
  </node>
  <node id="84611" label="BCCIP" cy:nodeId="67881">
    <graphics y="-343.6712397238193" x="40.009971545342864" z="0.0"/>
  </node>
  <node id="85603" label="PARK7" cy:nodeId="66889">
    <graphics y="154.2764684060635" x="167.88944237053818" z="0.0"/>
  </node>
  <node id="84579" label="IKBKE" cy:nodeId="67913">
    <graphics y="610.772211203915" x="-132.44718177496964" z="0.0"/>
  </node>
  <node id="85571" label="FADD" cy:nodeId="66921">
    <graphics y="-101.79370676483495" x="-44.363868786688386" z="0.0"/>
  </node>
  <node id="84547" label="TTC23L" cy:nodeId="67945">
    <graphics y="-667.0955866476475" x="-341.73888404547745" z="0.0"/>
  </node>
  <node id="85539" label="COA6" cy:nodeId="66953">
    <graphics y="199.93002522979396" x="-224.9279099243837" z="0.0"/>
  </node>
  <node id="84515" label="DYNC2H1" cy:nodeId="67977">
    <graphics y="-888.8269709249912" x="-635.5520554321962" z="0.0"/>
  </node>
  <node id="85507" label="HK3" cy:nodeId="66985">
    <graphics y="125.88734639678614" x="325.22486107171005" z="0.0"/>
  </node>
  <node id="85475" label="FERMT3" cy:nodeId="67017">
    <graphics y="305.7681218484463" x="35.307098315362396" z="0.0"/>
  </node>
  <node id="85443" label="CCDC58" cy:nodeId="67049">
    <graphics y="298.2123051980557" x="372.31543724358505" z="0.0"/>
  </node>
  <node id="85411" label="GHITM" cy:nodeId="67081">
    <graphics y="-237.9798029562412" x="169.7664260131163" z="0.0"/>
  </node>
  <node id="85379" label="ATP5G1" cy:nodeId="67113">
    <graphics y="-90.57881723846776" x="206.29575340569443" z="0.0"/>
  </node>
  <node id="85347" label="AATK" cy:nodeId="67145">
    <graphics y="293.21642507110255" x="-301.0917588013368" z="0.0"/>
  </node>
  <node id="85315" label="SERPINF2" cy:nodeId="67177">
    <graphics y="-182.15527903045995" x="-130.88391120612198" z="0.0"/>
  </node>
  <node id="85283" label="CRB3" cy:nodeId="67209">
    <graphics y="-288.4578302999912" x="-17.66082771002823" z="0.0"/>
  </node>
  <node id="85251" label="SND1" cy:nodeId="67241">
    <graphics y="-33.01408945526464" x="-175.64852149664932" z="0.0"/>
  </node>
  <node id="85219" label="NUDT22" cy:nodeId="67273">
    <graphics y="342.6025029519619" x="80.93623344719833" z="0.0"/>
  </node>
  <node id="85187" label="THAP1" cy:nodeId="67305">
    <graphics y="286.4255925515713" x="-253.8138504761415" z="0.0"/>
  </node>
  <node id="85155" label="TOR3A" cy:nodeId="67337">
    <graphics y="499.2551823953213" x="281.6061476928038" z="0.0"/>
  </node>
  <node id="85123" label="RHOV" cy:nodeId="67369">
    <graphics y="-649.822515358585" x="-532.9402390259462" z="0.0"/>
  </node>
  <node id="85091" label="EPN3" cy:nodeId="67401">
    <graphics y="-753.728277077335" x="-523.9983444946962" z="0.0"/>
  </node>
  <node id="85059" label="YY1" cy:nodeId="67433">
    <graphics y="141.24923909698146" x="-24.439821316595612" z="0.0"/>
  </node>
  <node id="86051" label="ALG1" cy:nodeId="66441">
    <graphics y="203.10640920196192" x="-16.587371899481354" z="0.0"/>
  </node>
  <node id="85027" label="BARX1" cy:nodeId="67465">
    <graphics y="-820.3509577413975" x="1126.3003539305969" z="0.0"/>
  </node>
  <node id="86019" label="FLAD1" cy:nodeId="66473">
    <graphics y="106.41987050567286" x="68.21744530022568" z="0.0"/>
  </node>
  <node id="84995" label="DNAJA3" cy:nodeId="67497">
    <graphics y="-134.4047754904209" x="280.6472853881163" z="0.0"/>
  </node>
  <node id="85987" label="TRAIP" cy:nodeId="66505">
    <graphics y="63.27712644134181" x="14.93701164544052" z="0.0"/>
  </node>
  <node id="84963" label="TIMM21" cy:nodeId="67529">
    <graphics y="322.19115651641505" x="256.1371230346007" z="0.0"/>
  </node>
  <node id="85955" label="SUOX" cy:nodeId="66537">
    <graphics y="-136.8387659689365" x="24.141693041924896" z="0.0"/>
  </node>
  <node id="84931" label="TM6SF1" cy:nodeId="67561">
    <graphics y="447.70470632110255" x="269.75550072014755" z="0.0"/>
  </node>
  <node id="85922" label="FIGNL1" cy:nodeId="66570">
    <graphics y="-83.79659067596776" x="187.8441085082335" z="0.0"/>
  </node>
  <node id="84898" label="USP18" cy:nodeId="67594">
    <graphics y="154.10368550811427" x="230.61368553460068" z="0.0"/>
  </node>
  <node id="85890" label="NAT10" cy:nodeId="66602">
    <graphics y="51.227022300106455" x="-123.5741501587587" z="0.0"/>
  </node>
  <node id="84866" label="ZNF786" cy:nodeId="67626">
    <graphics y="316.4258061746182" x="587.6144484740538" z="0.0"/>
  </node>
  <node id="85858" label="UROS" cy:nodeId="66634">
    <graphics y="187.89647115264552" x="-94.15989692389542" z="0.0"/>
  </node>
  <node id="84834" label="C18orf21" cy:nodeId="67658">
    <graphics y="284.5837499002041" x="224.8565139037413" z="0.0"/>
  </node>
  <node id="85826" label="DENR" cy:nodeId="66666">
    <graphics y="74.14846623931544" x="145.88230125725693" z="0.0"/>
  </node>
  <node id="84802" label="COA4" cy:nodeId="67690">
    <graphics y="529.8325749734463" x="-320.97399146735245" z="0.0"/>
  </node>
  <node id="85794" label="MFSD5" cy:nodeId="66698">
    <graphics y="-89.51677500213964" x="76.74835197747177" z="0.0"/>
  </node>
  <node id="84770" label="SUV39H1" cy:nodeId="67722">
    <graphics y="-31.990377297061514" x="-303.53099830328995" z="0.0"/>
  </node>
  <node id="85762" label="PES1" cy:nodeId="66730">
    <graphics y="-54.82275949920995" x="131.57430260003036" z="0.0"/>
  </node>
  <node id="84738" label="YARS2" cy:nodeId="67754">
    <graphics y="-93.60240732635839" x="449.96936790764755" z="0.0"/>
  </node>
  <node id="85730" label="POLR3B" cy:nodeId="66762">
    <graphics y="-150.37375437225683" x="-85.42923743903214" z="0.0"/>
  </node>
  <node id="84706" label="MOB3A" cy:nodeId="67786">
    <graphics y="395.9532719949307" x="58.01944725335068" z="0.0"/>
  </node>
  <node id="85698" label="DDX41" cy:nodeId="66794">
    <graphics y="303.56061757598536" x="-75.77785499274307" z="0.0"/>
  </node>
  <node id="84674" label="ENTPD3" cy:nodeId="67818">
    <graphics y="429.8127080300869" x="-366.34166724860245" z="0.0"/>
  </node>
  <node id="85666" label="CCDC137" cy:nodeId="66826">
    <graphics y="197.8894597390713" x="20.2022284728331" z="0.0"/>
  </node>
  <node id="84642" label="TMEM258" cy:nodeId="67850">
    <graphics y="140.63289845977442" x="560.1985549193663" z="0.0"/>
  </node>
  <node id="85634" label="B9D2" cy:nodeId="66858">
    <graphics y="40.272981772762705" x="-245.60909278571182" z="0.0"/>
  </node>
  <node id="84610" label="TMCO4" cy:nodeId="67882">
    <graphics y="-345.5520990988193" x="219.49025718987411" z="0.0"/>
  </node>
  <node id="85602" label="TP53I3" cy:nodeId="66890">
    <graphics y="-256.5155695578037" x="338.7933730346007" z="0.0"/>
  </node>
  <node id="84578" label="CORO1B" cy:nodeId="67914">
    <graphics y="467.47448171172755" x="285.3290175658507" z="0.0"/>
  </node>
  <node id="85570" label="CORO1A" cy:nodeId="66922">
    <graphics y="70.36811007056849" x="12.377536700372161" z="0.0"/>
  </node>
  <node id="84546" label="CCDC153" cy:nodeId="67946">
    <graphics y="-768.1546076437412" x="-500.5230942505556" z="0.0"/>
  </node>
  <node id="85538" label="GLYCTK" cy:nodeId="66954">
    <graphics y="-12.123929848331045" x="69.66002647698349" z="0.0"/>
  </node>
  <node id="84514" label="GLB1L2" cy:nodeId="67978">
    <graphics y="-690.9554499288975" x="-318.93676002203995" z="0.0"/>
  </node>
  <node id="85506" label="NIPSNAP1" cy:nodeId="66986">
    <graphics y="19.572271476131846" x="-30.226052357550202" z="0.0"/>
  </node>
  <node id="85474" label="PUSL1" cy:nodeId="67018">
    <graphics y="-103.75203501190526" x="332.56836693108505" z="0.0"/>
  </node>
  <node id="85442" label="PDCD6" cy:nodeId="67050">
    <graphics y="-253.38232981170995" x="-89.28318031012589" z="0.0"/>
  </node>
  <node id="85410" label="ISOC2" cy:nodeId="67082">
    <graphics y="-103.80505930389745" x="239.00260155022568" z="0.0"/>
  </node>
  <node id="85378" label="WDR89" cy:nodeId="67114">
    <graphics y="191.35197652373927" x="-227.68497474371964" z="0.0"/>
  </node>
  <node id="85346" label="KANK1" cy:nodeId="67146">
    <graphics y="255.11757863555567" x="-292.9229965943056" z="0.0"/>
  </node>
  <node id="85314" label="TCF19" cy:nodeId="67178">
    <graphics y="-114.35910593475683" x="235.32361595452255" z="0.0"/>
  </node>
  <node id="85282" label="ATP6V0E1" cy:nodeId="67210">
    <graphics y="-327.89587961639745" x="-50.9357109802919" z="0.0"/>
  </node>
  <node id="85250" label="RCC1" cy:nodeId="67242">
    <graphics y="15.992414603573252" x="-51.7671433228212" z="0.0"/>
  </node>
  <node id="85218" label="CENPM" cy:nodeId="67274">
    <graphics y="-508.92871653045995" x="-248.614997937079" z="0.0"/>
  </node>
  <node id="85186" label="ZHX1" cy:nodeId="67306">
    <graphics y="-479.3137873312412" x="-368.3958054321962" z="0.0"/>
  </node>
  <node id="85154" label="ELF1" cy:nodeId="67338">
    <graphics y="75.44146550689356" x="22.946155474786224" z="0.0"/>
  </node>
  <node id="85122" label="MDH1B" cy:nodeId="67370">
    <graphics y="-565.2957209249912" x="-402.2680283325868" z="0.0"/>
  </node>
  <node id="85090" label="DZIP1L" cy:nodeId="67402">
    <graphics y="-499.5851496359287" x="-659.1326218384462" z="0.0"/>
  </node>
  <node id="85058" label="EVX2" cy:nodeId="67434">
    <graphics y="-587.3745783468662" x="-570.2312546509462" z="0.0"/>
  </node>
  <node id="86050" label="SLC52A2" cy:nodeId="66442">
    <graphics y="106.55627263579981" x="153.26589195549911" z="0.0"/>
  </node>
  <node id="85026" label="BCL6" cy:nodeId="67466">
    <graphics y="-752.1366633078037" x="1090.1617430907531" z="0.0"/>
  </node>
  <node id="86018" label="WDR12" cy:nodeId="66474">
    <graphics y="40.69012654815333" x="186.69461815178818" z="0.0"/>
  </node>
  <node id="84994" label="HIF1AN" cy:nodeId="67498">
    <graphics y="-127.64267527069433" x="257.0023879271788" z="0.0"/>
  </node>
  <node id="85986" label="APEH" cy:nodeId="66506">
    <graphics y="-147.25273691620214" x="28.160041735772552" z="0.0"/>
  </node>
  <node id="84962" label="THOP1" cy:nodeId="67530">
    <graphics y="306.6538640359463" x="-17.33907706915909" z="0.0"/>
  </node>
  <node id="85954" label="DAP3" cy:nodeId="66538">
    <graphics y="-22.8226984640537" x="94.72010032952255" z="0.0"/>
  </node>
  <node id="84930" label="NPRL3" cy:nodeId="67562">
    <graphics y="225.9028416970791" x="61.686363146905364" z="0.0"/>
  </node>
  <node id="85921" label="PARP1" cy:nodeId="66571">
    <graphics y="86.69734109435694" x="11.140975878838958" z="0.0"/>
  </node>
  <node id="84897" label="MVP" cy:nodeId="67595">
    <graphics y="-264.16333567108495" x="343.8349990111632" z="0.0"/>
  </node>
  <node id="85889" label="CNDP2" cy:nodeId="66603">
    <graphics y="111.25147832427638" x="-259.9431992310243" z="0.0"/>
  </node>
  <node id="84865" label="HPS6" cy:nodeId="67627">
    <graphics y="246.45304311309474" x="-122.42721564948135" z="0.0"/>
  </node>
  <node id="85857" label="NRGN" cy:nodeId="66635">
    <graphics y="-249.05362497772558" x="-356.1168747681337" z="0.0"/>
  </node>
  <node id="84833" label="KBTBD6" cy:nodeId="67659">
    <graphics y="74.75033200774806" x="479.98987572014755" z="0.0"/>
  </node>
  <node id="85825" label="FOXRED1" cy:nodeId="66667">
    <graphics y="148.07369435821192" x="226.68799583733505" z="0.0"/>
  </node>
  <node id="84801" label="SRPRB" cy:nodeId="67691">
    <graphics y="-410.1691645285068" x="116.80352012932724" z="0.0"/>
  </node>
  <node id="85793" label="SSR1" cy:nodeId="66699">
    <graphics y="-78.04111277069433" x="-3.717432095404206" z="0.0"/>
  </node>
  <node id="84769" label="ABCF2" cy:nodeId="67723">
    <graphics y="525.2170659402432" x="-140.04515083014542" z="0.0"/>
  </node>
  <node id="85761" label="MRPL4" cy:nodeId="66731">
    <graphics y="-122.74495493378026" x="-36.5310536164003" z="0.0"/>
  </node>
  <node id="84737" label="C15orf52" cy:nodeId="67755">
    <graphics y="493.5614568093838" x="-126.76392371832901" z="0.0"/>
  </node>
  <node id="85729" label="LACTB2" cy:nodeId="66763">
    <graphics y="53.84395040069239" x="267.27405540764755" z="0.0"/>
  </node>
  <node id="84705" label="C14orf119" cy:nodeId="67787">
    <graphics y="-341.04138742889745" x="83.06998436272568" z="0.0"/>
  </node>
  <node id="85697" label="THAP8" cy:nodeId="66795">
    <graphics y="66.76101220641749" x="179.48549644768661" z="0.0"/>
  </node>
  <node id="84673" label="SEZ6L2" cy:nodeId="67819">
    <graphics y="-302.2236994406162" x="138.09925072014755" z="0.0"/>
  </node>
  <node id="85665" label="TBRG4" cy:nodeId="66827">
    <graphics y="-21.224096169131826" x="97.42321007073349" z="0.0"/>
  </node>
  <node id="84641" label="HPCAL1" cy:nodeId="67851">
    <graphics y="552.7098332742275" x="272.5700148803038" z="0.0"/>
  </node>
  <node id="85633" label="POLDIP2" cy:nodeId="66859">
    <graphics y="197.2106267312588" x="82.78808586419052" z="0.0"/>
  </node>
  <node id="84609" label="TMEM254" cy:nodeId="67883">
    <graphics y="-413.60486399139745" x="-201.66194923102432" z="0.0"/>
  </node>
  <node id="85601" label="ETV6" cy:nodeId="66891">
    <graphics y="99.6351815560879" x="91.88801567376083" z="0.0"/>
  </node>
  <node id="84577" label="SIGMAR1" cy:nodeId="67915">
    <graphics y="504.6233769753994" x="559.4688185912413" z="0.0"/>
  </node>
  <node id="85569" label="CHCHD1" cy:nodeId="66923">
    <graphics y="122.37984670196192" x="223.92850487053818" z="0.0"/>
  </node>
  <node id="84545" label="C9orf9" cy:nodeId="67947">
    <graphics y="-723.4885920187412" x="-736.4591599243837" z="0.0"/>
  </node>
  <node id="85537" label="TBCE" cy:nodeId="66955">
    <graphics y="439.6137334207119" x="169.9088820678038" z="0.0"/>
  </node>
  <node id="84513" label="CCDC176" cy:nodeId="67979">
    <graphics y="-796.8971003195225" x="-581.0463181275087" z="0.0"/>
  </node>
  <node id="85505" label="TRUB2" cy:nodeId="66987">
    <graphics y="276.4058476785244" x="67.10559837639755" z="0.0"/>
  </node>
  <node id="85473" label="ETFA" cy:nodeId="67019">
    <graphics y="-127.83012949432714" x="309.8659438353819" z="0.0"/>
  </node>
  <node id="85441" label="HARBI1" cy:nodeId="67051">
    <graphics y="13.429334769588877" x="359.8259047728819" z="0.0"/>
  </node>
  <node id="85409" label="NDUFAF1" cy:nodeId="67083">
    <graphics y="-280.96021067108495" x="-6.044023587103425" z="0.0"/>
  </node>
  <node id="85377" label="SCLY" cy:nodeId="67115">
    <graphics y="448.3411504128994" x="121.74723045647568" z="0.0"/>
  </node>
  <node id="85345" label="PC" cy:nodeId="67147">
    <graphics y="213.44640553985255" x="82.49678032219833" z="0.0"/>
  </node>
  <node id="85313" label="SMAGP" cy:nodeId="67179">
    <graphics y="-9.00341593231542" x="-525.7056504028993" z="0.0"/>
  </node>
  <node id="85281" label="PHYH" cy:nodeId="67211">
    <graphics y="-250.2108820578037" x="-281.8154831665712" z="0.0"/>
  </node>
  <node id="85249" label="ATAD3C" cy:nodeId="67243">
    <graphics y="235.423074851376" x="-145.90135963141495" z="0.0"/>
  </node>
  <node id="85217" label="CENPO" cy:nodeId="67275">
    <graphics y="-338.6487482687412" x="238.78565208733505" z="0.0"/>
  </node>
  <node id="85185" label="LRRC48" cy:nodeId="67307">
    <graphics y="-680.913823952335" x="-485.14830787360245" z="0.0"/>
  </node>
  <node id="85153" label="FXN" cy:nodeId="67339">
    <graphics y="66.43548215423243" x="561.140632556085" z="0.0"/>
  </node>
  <node id="85121" label="WDR96" cy:nodeId="67371">
    <graphics y="-745.345952858585" x="-602.8281784790712" z="0.0"/>
  </node>
  <node id="85089" label="CP" cy:nodeId="67403">
    <graphics y="-580.5533503195225" x="-305.4399643677431" z="0.0"/>
  </node>
  <node id="85057" label="HSFY2" cy:nodeId="67435">
    <graphics y="-828.2778986593662" x="-646.5701218384462" z="0.0"/>
  </node>
  <node id="86049" label="C16orf59" cy:nodeId="66443">
    <graphics y="76.04814351592677" x="69.85046379387802" z="0.0"/>
  </node>
  <node id="85025" label="FOXB1" cy:nodeId="67467">
    <graphics y="-944.2408045431553" x="1058.8291625243469" z="0.0"/>
  </node>
  <node id="86017" label="VPS18" cy:nodeId="66475">
    <graphics y="69.43769277129786" x="-174.65651710211807" z="0.0"/>
  </node>
  <node id="84993" label="TGFBRAP1" cy:nodeId="67499">
    <graphics y="105.78917134795802" x="474.74964134514755" z="0.0"/>
  </node>
  <node id="85985" label="MANEAL" cy:nodeId="66507">
    <graphics y="-19.375379433291982" x="18.29607384026474" z="0.0"/>
  </node>
  <node id="84961" label="PUF60" cy:nodeId="67531">
    <graphics y="21.75653279815333" x="388.3189467650694" z="0.0"/>
  </node>
  <node id="85953" label="CENPH" cy:nodeId="66539">
    <graphics y="162.1834508279385" x="49.505943225030364" z="0.0"/>
  </node>
  <node id="84929" label="CLP1" cy:nodeId="67563">
    <graphics y="294.9805241921963" x="19.444381640557708" z="0.0"/>
  </node>
  <node id="85920" label="CDK5" cy:nodeId="66572">
    <graphics y="106.14177526031153" x="-48.29138381659561" z="0.0"/>
  </node>
  <node id="84896" label="RPUSD4" cy:nodeId="67596">
    <graphics y="398.5485478738369" x="95.98424522698349" z="0.0"/>
  </node>
  <node id="85888" label="RBM47" cy:nodeId="66604">
    <graphics y="430.7373601296963" x="-226.90595252692276" z="0.0"/>
  </node>
  <node id="84864" label="MTERFD1" cy:nodeId="67628">
    <graphics y="109.23751653228419" x="-12.711240841742097" z="0.0"/>
  </node>
  <node id="85856" label="SSBP1" cy:nodeId="66636">
    <graphics y="10.45135701690333" x="208.26876060784286" z="0.0"/>
  </node>
  <node id="84832" label="NDUFS3" cy:nodeId="67660">
    <graphics y="-15.131391396182607" x="391.29773704827255" z="0.0"/>
  </node>
  <node id="85824" label="C1orf233" cy:nodeId="66668">
    <graphics y="-78.64912973846776" x="-14.415041043158112" z="0.0"/>
  </node>
  <node id="84800" label="COMMD5" cy:nodeId="67692">
    <graphics y="115.74843419585841" x="438.02136986077255" z="0.0"/>
  </node>
  <node id="85792" label="PRPF19" cy:nodeId="66700">
    <graphics y="-82.35436045135839" x="304.1187514525694" z="0.0"/>
  </node>
  <node id="84768" label="ZBED6CL" cy:nodeId="67724">
    <graphics y="-107.29703318085058" x="388.01795189202255" z="0.0"/>
  </node>
  <node id="85760" label="C19orf59" cy:nodeId="66732">
    <graphics y="126.14331258330958" x="100.78067772210068" z="0.0"/>
  </node>
  <node id="84736" label="ATP6V1C1" cy:nodeId="67756">
    <graphics y="288.31534780059474" x="597.2874221068663" z="0.0"/>
  </node>
  <node id="85728" label="ASAH1" cy:nodeId="66764">
    <graphics y="-152.75766550506933" x="-139.15394599616104" z="0.0"/>
  </node>
  <node id="84704" label="HS1BP3" cy:nodeId="67788">
    <graphics y="378.18371022735255" x="-433.1104355591493" z="0.0"/>
  </node>
  <node id="85696" label="BRMS1" cy:nodeId="66796">
    <graphics y="394.9569341043057" x="-116.5613327759462" z="0.0"/>
  </node>
  <node id="84672" label="SPTSSA" cy:nodeId="67820">
    <graphics y="79.59508336578028" x="-245.79482276618057" z="0.0"/>
  </node>
  <node id="85664" label="B3GNT7" cy:nodeId="66828">
    <graphics y="-64.59612070526464" x="245.8339308959288" z="0.0"/>
  </node>
  <node id="84640" label="ID3" cy:nodeId="67852">
    <graphics y="523.5049382546963" x="294.9189833861632" z="0.0"/>
  </node>
  <node id="85632" label="PAQR4" cy:nodeId="66860">
    <graphics y="69.73040975127833" x="-68.7663880127626" z="0.0"/>
  </node>
  <node id="84608" label="KNOP1" cy:nodeId="67884">
    <graphics y="-137.0944727560459" x="-421.7260361450868" z="0.0"/>
  </node>
  <node id="85600" label="ASF1B" cy:nodeId="66892">
    <graphics y="147.62633718047755" x="-6.294475628729401" z="0.0"/>
  </node>
  <node id="84576" label="CARD9" cy:nodeId="67916">
    <graphics y="590.6937810281338" x="226.5263137084288" z="0.0"/>
  </node>
  <node id="85568" label="NUDT5" cy:nodeId="66924">
    <graphics y="-13.590703835147451" x="217.84726707756943" z="0.0"/>
  </node>
  <node id="84544" label="ZNF273" cy:nodeId="67948">
    <graphics y="-590.21777903046" x="-770.6578903931337" z="0.0"/>
  </node>
  <node id="85536" label="ATP5H" cy:nodeId="66956">
    <graphics y="-83.40840708221776" x="61.00062553704208" z="0.0"/>
  </node>
  <node id="84512" label="SYT8" cy:nodeId="67980">
    <graphics y="-822.51221262421" x="-436.4910507935243" z="0.0"/>
  </node>
  <node id="85504" label="SGOL2" cy:nodeId="66988">
    <graphics y="334.8473454812588" x="145.1741408568663" z="0.0"/>
  </node>
  <node id="85472" label="MEGF9" cy:nodeId="67020">
    <graphics y="347.0956670144619" x="-160.51796729743057" z="0.0"/>
  </node>
  <node id="85440" label="GPAM" cy:nodeId="67052">
    <graphics y="154.75517476592677" x="244.92200462639755" z="0.0"/>
  </node>
  <node id="85408" label="NDUFS8" cy:nodeId="67084">
    <graphics y="-92.09285532440526" x="-196.35604102789932" z="0.0"/>
  </node>
  <node id="85376" label="PSMB4" cy:nodeId="67116">
    <graphics y="-7.952459206241201" x="518.3338088256163" z="0.0"/>
  </node>
  <node id="85344" label="TOMM40" cy:nodeId="67148">
    <graphics y="348.2605229714932" x="-420.2106552857118" z="0.0"/>
  </node>
  <node id="85312" label="CNPPD1" cy:nodeId="67180">
    <graphics y="36.41440404449122" x="-311.3672104614931" z="0.0"/>
  </node>
  <node id="85280" label="SLC26A9" cy:nodeId="67212">
    <graphics y="-332.5490473410068" x="-168.82421119391495" z="0.0"/>
  </node>
  <node id="85248" label="RPN2" cy:nodeId="67244">
    <graphics y="-260.2373713156162" x="110.5637892943663" z="0.0"/>
  </node>
  <node id="85216" label="DUS2" cy:nodeId="67276">
    <graphics y="414.3012334207119" x="-157.4576950806337" z="0.0"/>
  </node>
  <node id="85184" label="C1orf192" cy:nodeId="67308">
    <graphics y="-688.5221003195225" x="-452.9693222778993" z="0.0"/>
  </node>
  <node id="85152" label="MEF2B" cy:nodeId="67340">
    <graphics y="25.891645560604502" x="192.1825637084288" z="0.0"/>
  </node>
  <node id="85120" label="FHAD1" cy:nodeId="67372">
    <graphics y="-712.2799738546787" x="-471.3760605591493" z="0.0"/>
  </node>
  <node id="85088" label="RFX2" cy:nodeId="67404">
    <graphics y="-586.4645441671787" x="-484.1720505493837" z="0.0"/>
  </node>
  <node id="85056" label="TP63" cy:nodeId="67436">
    <graphics y="-766.5499933859287" x="-809.8472214478212" z="0.0"/>
  </node>
  <node id="86048" label="MCM2" cy:nodeId="66444">
    <graphics y="-54.66124521698339" x="55.949554370049896" z="0.0"/>
  </node>
  <node id="85024" label="LHX1" cy:nodeId="67468">
    <graphics y="-954.15723215546" x="990.9052199584288" z="0.0"/>
  </node>
  <node id="86016" label="ALG3" cy:nodeId="66476">
    <graphics y="135.92727483306544" x="-25.574446274633942" z="0.0"/>
  </node>
  <node id="84992" label="PSME3" cy:nodeId="67500">
    <graphics y="83.59438622985499" x="278.2168349486632" z="0.0"/>
  </node>
  <node id="85984" label="SEC13" cy:nodeId="66508">
    <graphics y="210.25190175567286" x="250.35013572991318" z="0.0"/>
  </node>
  <node id="84960" label="SHKBP1" cy:nodeId="67532">
    <graphics y="464.86620534454005" x="205.40813438713974" z="0.0"/>
  </node>
  <node id="85952" label="SLC25A11" cy:nodeId="66540">
    <graphics y="67.30482066665309" x="193.89723961174911" z="0.0"/>
  </node>
  <node id="84928" label="SHARPIN" cy:nodeId="67564">
    <graphics y="270.4791509011807" x="71.20694725335068" z="0.0"/>
  </node>
  <node id="85919" label="LIMS2" cy:nodeId="66573">
    <graphics y="270.29572499786036" x="81.67922966301865" z="0.0"/>
  </node>
  <node id="84895" label="MOCS3" cy:nodeId="67597">
    <graphics y="-222.46899973358495" x="355.9062270385069" z="0.0"/>
  </node>
  <node id="85887" label="NDC1" cy:nodeId="66605">
    <graphics y="53.770317206722666" x="247.00791160881943" z="0.0"/>
  </node>
  <node id="84863" label="TRMT10C" cy:nodeId="67629">
    <graphics y="74.06001485381739" x="424.7830580931944" z="0.0"/>
  </node>
  <node id="85855" label="GPD1L" cy:nodeId="66637">
    <graphics y="186.84613240752833" x="4.694393084649505" z="0.0"/>
  </node>
  <node id="84831" label="ZSCAN20" cy:nodeId="67661">
    <graphics y="155.41555226836817" x="424.9557265502257" z="0.0"/>
  </node>
  <node id="85823" label="COX6B1" cy:nodeId="66669">
    <graphics y="215.98143971954005" x="201.66226951897568" z="0.0"/>
  </node>
  <node id="84799" label="DPH2" cy:nodeId="67693">
    <graphics y="380.7573491433682" x="387.0382460814757" z="0.0"/>
  </node>
  <node id="85791" label="NLE1" cy:nodeId="66701">
    <graphics y="-182.3837793966709" x="-63.990299298162995" z="0.0"/>
  </node>
  <node id="84767" label="SEC24C" cy:nodeId="67725">
    <graphics y="395.6563054421963" x="310.8391799193663" z="0.0"/>
  </node>
  <node id="85759" label="RRP1B" cy:nodeId="66733">
    <graphics y="158.4441930154385" x="348.0009536010069" z="0.0"/>
  </node>
  <node id="84735" label="C12orf4" cy:nodeId="67757">
    <graphics y="-29.487584938663076" x="451.9834975463194" z="0.0"/>
  </node>
  <node id="85727" label="LCMT1" cy:nodeId="66765">
    <graphics y="130.800516257626" x="32.455474780206146" z="0.0"/>
  </node>
  <node id="84703" label="COL5A1" cy:nodeId="67789">
    <graphics y="-268.6238459249912" x="273.37573997796005" z="0.0"/>
  </node>
  <node id="85695" label="RCCD1" cy:nodeId="66797">
    <graphics y="112.14162267242091" x="-158.4597702759462" z="0.0"/>
  </node>
  <node id="84671" label="MRPL47" cy:nodeId="67821">
    <graphics y="-204.30454050506933" x="192.64031212151474" z="0.0"/>
  </node>
  <node id="85663" label="PSMG3" cy:nodeId="66829">
    <graphics y="140.36286366973536" x="176.73621361077255" z="0.0"/>
  </node>
  <node id="84639" label="KCNQ1" cy:nodeId="67853">
    <graphics y="-96.55376230682714" x="-240.32750709235245" z="0.0"/>
  </node>
  <node id="85631" label="RNASEH2A" cy:nodeId="66861">
    <graphics y="138.45380605254786" x="179.80173485100693" z="0.0"/>
  </node>
  <node id="84607" label="PLA2G10" cy:nodeId="67885">
    <graphics y="-439.2772883078037" x="-130.5076981323915" z="0.0"/>
  </node>
  <node id="85599" label="PDIA4" cy:nodeId="66893">
    <graphics y="27.378458152157236" x="108.77530662835068" z="0.0"/>
  </node>
  <node id="84575" label="TSNARE1" cy:nodeId="67917">
    <graphics y="524.6795598367275" x="-267.36627967536026" z="0.0"/>
  </node>
  <node id="85567" label="BIN2" cy:nodeId="66925">
    <graphics y="99.2196599343838" x="302.6666640502257" z="0.0"/>
  </node>
  <node id="84543" label="ENKUR" cy:nodeId="67949">
    <graphics y="-735.7461603781162" x="-652.3075485962587" z="0.0"/>
  </node>
  <node id="85535" label="CCT5" cy:nodeId="66957">
    <graphics y="55.07767308745997" x="242.63742821038193" z="0.0"/>
  </node>
  <node id="84511" label="HSPB11" cy:nodeId="67981">
    <graphics y="-639.281499733585" x="-299.9822312134462" z="0.0"/>
  </node>
  <node id="85503" label="NSF" cy:nodeId="66989">
    <graphics y="-170.49780832733495" x="-1.2569084900575263" z="0.0"/>
  </node>
  <node id="85471" label="SMUG1" cy:nodeId="67021">
    <graphics y="-73.69406687225683" x="147.59860985100693" z="0.0"/>
  </node>
  <node id="85439" label="CHAF1A" cy:nodeId="67053">
    <graphics y="129.08785451446192" x="322.4772109252257" z="0.0"/>
  </node>
  <node id="85407" label="MGME1" cy:nodeId="67085">
    <graphics y="111.96323598418849" x="-159.8406296509462" z="0.0"/>
  </node>
  <node id="85375" label="DARS2" cy:nodeId="67117">
    <graphics y="-280.0685480734287" x="136.7489699584288" z="0.0"/>
  </node>
  <node id="85343" label="MRPS2" cy:nodeId="67149">
    <graphics y="491.89696706329005" x="-163.05716712653214" z="0.0"/>
  </node>
  <node id="85311" label="TMEM204" cy:nodeId="67181">
    <graphics y="497.21520436797755" x="-0.7967491882997138" z="0.0"/>
  </node>
  <node id="85279" label="PRKCZ" cy:nodeId="67213">
    <graphics y="-10.602697243350576" x="-426.8336411255556" z="0.0"/>
  </node>
  <node id="85247" label="SLC25A16" cy:nodeId="67245">
    <graphics y="541.0194951394619" x="-134.68691260993057" z="0.0"/>
  </node>
  <node id="85215" label="ZKSCAN4" cy:nodeId="67277">
    <graphics y="104.38756955657618" x="280.5727309447569" z="0.0"/>
  </node>
  <node id="85183" label="PIH1D2" cy:nodeId="67309">
    <graphics y="-586.8684748312412" x="-625.3546677368837" z="0.0"/>
  </node>
  <node id="85151" label="MXI1" cy:nodeId="67341">
    <graphics y="-623.3212336203037" x="-513.485344006415" z="0.0"/>
  </node>
  <node id="85119" label="CCDC114" cy:nodeId="67373">
    <graphics y="-760.0686701437412" x="-592.3805466431337" z="0.0"/>
  </node>
  <node id="85087" label="C10orf95" cy:nodeId="67405">
    <graphics y="-470.84204660858495" x="-452.84899146735245" z="0.0"/>
  </node>
  <node id="85055" label="FLI1" cy:nodeId="67437">
    <graphics y="51.94447148833888" x="-443.2787705200868" z="0.0"/>
  </node>
  <node id="86047" label="VSIG4" cy:nodeId="66445">
    <graphics y="15.545549521786143" x="-55.75404937445694" z="0.0"/>
  </node>
  <node id="85023" label="LIN54" cy:nodeId="67469">
    <graphics y="-721.6174677511631" x="1026.7061232787414" z="0.0"/>
  </node>
  <node id="86015" label="MARVELD3" cy:nodeId="66477">
    <graphics y="-76.43138681854589" x="-151.23365791022354" z="0.0"/>
  </node>
  <node id="84991" label="E2F4" cy:nodeId="67501">
    <graphics y="119.23145497832911" x="-164.37323768317276" z="0.0"/>
  </node>
  <node id="85983" label="C2" cy:nodeId="66509">
    <graphics y="-62.76067148651464" x="-122.67133338629776" z="0.0"/>
  </node>
  <node id="84959" label="ATP5A1" cy:nodeId="67533">
    <graphics y="116.97232640777247" x="-342.03868873297745" z="0.0"/>
  </node>
  <node id="85951" label="LAIR1" cy:nodeId="66541">
    <graphics y="-89.70166574920995" x="-57.85143287360245" z="0.0"/>
  </node>
  <node id="84927" label="SEMA4F" cy:nodeId="67565">
    <graphics y="144.74364675079005" x="398.6260451537413" z="0.0"/>
  </node>
  <node id="85918" label="TIMM13" cy:nodeId="66574">
    <graphics y="146.45898641143458" x="-216.79396827399307" z="0.0"/>
  </node>
  <node id="84894" label="FAM217B" cy:nodeId="67598">
    <graphics y="188.59464467559474" x="-156.89963538825089" z="0.0"/>
  </node>
  <node id="85886" label="TRIP13" cy:nodeId="66606">
    <graphics y="-201.33740793670995" x="-162.76056678473526" z="0.0"/>
  </node>
  <node id="84862" label="VAC14" cy:nodeId="67630">
    <graphics y="337.50695241485255" x="-66.73670966803604" z="0.0"/>
  </node>
  <node id="85854" label="TTLL12" cy:nodeId="66638">
    <graphics y="-70.55920969452245" x="-186.96170814215714" z="0.0"/>
  </node>
  <node id="84830" label="H2AFY" cy:nodeId="67662">
    <graphics y="-165.1806086203037" x="-16.01160438239151" z="0.0"/>
  </node>
  <node id="85822" label="AARS2" cy:nodeId="66670">
    <graphics y="314.4100896218838" x="308.2218398314757" z="0.0"/>
  </node>
  <node id="84798" label="PCYT2" cy:nodeId="67694">
    <graphics y="363.6889287332119" x="-197.77571876227432" z="0.0"/>
  </node>
  <node id="85790" label="AP1B1" cy:nodeId="66702">
    <graphics y="-318.5471857687412" x="-147.77844245612198" z="0.0"/>
  </node>
  <node id="84766" label="SF3B4" cy:nodeId="67726">
    <graphics y="-227.95215403045995" x="386.96570579827255" z="0.0"/>
  </node>
  <node id="85758" label="SLC25A4" cy:nodeId="66734">
    <graphics y="-289.2791498800693" x="259.12744896233505" z="0.0"/>
  </node>
  <node id="84734" label="NDUFB2" cy:nodeId="67758">
    <graphics y="150.51357472930567" x="174.61283104241318" z="0.0"/>
  </node>
  <node id="85726" label="CUL7" cy:nodeId="66766">
    <graphics y="14.625665793758799" x="75.1018752318663" z="0.0"/>
  </node>
  <node id="84702" label="DNAJB12" cy:nodeId="67790">
    <graphics y="-362.88074289764745" x="274.1818312865538" z="0.0"/>
  </node>
  <node id="85694" label="RRAGA" cy:nodeId="66798">
    <graphics y="240.24999440704005" x="-170.54856116950089" z="0.0"/>
  </node>
  <node id="84670" label="LPCAT1" cy:nodeId="67822">
    <graphics y="165.97367299590724" x="-281.88544471442276" z="0.0"/>
  </node>
  <node id="85662" label="NDUFS1" cy:nodeId="66830">
    <graphics y="-49.613668312686514" x="210.46543114006943" z="0.0"/>
  </node>
  <node id="84638" label="C19orf54" cy:nodeId="67854">
    <graphics y="-207.0343683859287" x="-361.3368149536806" z="0.0"/>
  </node>
  <node id="85630" label="ACAT1" cy:nodeId="66862">
    <graphics y="214.60257924590724" x="-81.58629615485245" z="0.0"/>
  </node>
  <node id="84606" label="ATIC" cy:nodeId="67886">
    <graphics y="-261.6672114035068" x="3.4273490172666925" z="0.0"/>
  </node>
  <node id="85598" label="FICD" cy:nodeId="66894">
    <graphics y="121.06357396636622" x="63.52465812981552" z="0.0"/>
  </node>
  <node id="84574" label="MPST" cy:nodeId="67918">
    <graphics y="467.02697194610255" x="-261.8348465698915" z="0.0"/>
  </node>
  <node id="85566" label="TACC3" cy:nodeId="66926">
    <graphics y="266.6824284890713" x="112.68613426506943" z="0.0"/>
  </node>
  <node id="84542" label="ZNF474" cy:nodeId="67950">
    <graphics y="-729.218999733585" x="-720.6461716431337" z="0.0"/>
  </node>
  <node id="85534" label="TTI1" cy:nodeId="66958">
    <graphics y="-33.600545754092764" x="533.1813430053038" z="0.0"/>
  </node>
  <node id="84510" label="CYP2J2" cy:nodeId="67982">
    <graphics y="-458.2514094015537" x="-606.88451392829" z="0.0"/>
  </node>
  <node id="85502" label="OSTC" cy:nodeId="66990">
    <graphics y="-125.95181833710058" x="174.58205406487411" z="0.0"/>
  </node>
  <node id="85470" label="HDAC3" cy:nodeId="67022">
    <graphics y="279.5478154519619" x="463.12195579827255" z="0.0"/>
  </node>
  <node id="85438" label="HYAL1" cy:nodeId="67054">
    <graphics y="502.2603093484463" x="-298.99108131110245" z="0.0"/>
  </node>
  <node id="85406" label="MRPS10" cy:nodeId="67086">
    <graphics y="355.52623952422755" x="-54.06077583014542" z="0.0"/>
  </node>
  <node id="85374" label="AP3M1" cy:nodeId="67118">
    <graphics y="431.9397221902432" x="-87.1700745362001" z="0.0"/>
  </node>
  <node id="85342" label="EHF" cy:nodeId="67150">
    <graphics y="57.19006360564845" x="5.453041003350677" z="0.0"/>
  </node>
  <node id="85310" label="GCAT" cy:nodeId="67182">
    <graphics y="98.17691434417384" x="-377.4106980103212" z="0.0"/>
  </node>
  <node id="85278" label="CNPY2" cy:nodeId="67214">
    <graphics y="86.64247430358546" x="-197.20307166754776" z="0.0"/>
  </node>
  <node id="85246" label="TMEM243" cy:nodeId="67246">
    <graphics y="-51.21876322235448" x="-326.16246802985245" z="0.0"/>
  </node>
  <node id="85214" label="RAE1" cy:nodeId="67278">
    <graphics y="594.0264226296963" x="161.58834068596786" z="0.0"/>
  </node>
  <node id="85182" label="LRRC46" cy:nodeId="67310">
    <graphics y="-643.8336847921787" x="-603.1463547486024" z="0.0"/>
  </node>
  <node id="85150" label="TP73" cy:nodeId="67342">
    <graphics y="-830.85547434296" x="-533.587883068915" z="0.0"/>
  </node>
  <node id="85118" label="SIX1" cy:nodeId="67374">
    <graphics y="-772.5846003195225" x="-564.2728195923524" z="0.0"/>
  </node>
  <node id="85086" label="SIX4" cy:nodeId="67406">
    <graphics y="-671.1544245382725" x="-563.167472912665" z="0.0"/>
  </node>
  <node id="85054" label="HEY1" cy:nodeId="67438">
    <graphics y="-98.77869211639745" x="-616.62718970954" z="0.0"/>
  </node>
  <node id="86046" label="SLC25A10" cy:nodeId="66446">
    <graphics y="61.483505378109385" x="-67.17875678717667" z="0.0"/>
  </node>
  <node id="85022" label="MSX2" cy:nodeId="67470">
    <graphics y="-923.6943873068271" x="926.6178511840147" z="0.0"/>
  </node>
  <node id="86014" label="PCK2" cy:nodeId="66478">
    <graphics y="75.9474488595547" x="-168.82933814703995" z="0.0"/>
  </node>
  <node id="84990" label="ZSCAN25" cy:nodeId="67502">
    <graphics y="312.92833913360255" x="157.68843834221786" z="0.0"/>
  </node>
  <node id="85982" label="GMPPA" cy:nodeId="66510">
    <graphics y="165.4799367288174" x="32.2949904662413" z="0.0"/>
  </node>
  <node id="84958" label="ELP3" cy:nodeId="67534">
    <graphics y="12.438257346493174" x="-12.415826870794831" z="0.0"/>
  </node>
  <node id="85950" label="SAC3D1" cy:nodeId="66542">
    <graphics y="-15.430066933291982" x="266.8108596068663" z="0.0"/>
  </node>
  <node id="84926" label="CYB561D1" cy:nodeId="67566">
    <graphics y="422.8487187722744" x="189.1072921019835" z="0.0"/>
  </node>
  <node id="85917" label="CPSF3" cy:nodeId="66575">
    <graphics y="-17.55620371307714" x="-62.85176665961319" z="0.0"/>
  </node>
  <node id="84893" label="LRRC8E" cy:nodeId="67599">
    <graphics y="-255.91272531952245" x="-133.95228583991104" z="0.0"/>
  </node>
  <node id="85885" label="SLC35A4" cy:nodeId="66607">
    <graphics y="92.06884015594142" x="89.20497124016708" z="0.0"/>
  </node>
  <node id="84861" label="MARS2" cy:nodeId="67631">
    <graphics y="-132.00562082733495" x="104.22141258538193" z="0.0"/>
  </node>
  <node id="85853" label="GNPDA1" cy:nodeId="66639">
    <graphics y="159.55423940215724" x="65.08367149651474" z="0.0"/>
  </node>
  <node id="84829" label="DSCC1" cy:nodeId="67663">
    <graphics y="282.6189824441494" x="157.86232750237411" z="0.0"/>
  </node>
  <node id="85821" label="TLR8" cy:nodeId="66671">
    <graphics y="275.0416509011807" x="-81.3644219177919" z="0.0"/>
  </node>
  <node id="84797" label="RBFA" cy:nodeId="67695">
    <graphics y="15.439233908993174" x="312.0376967650694" z="0.0"/>
  </node>
  <node id="85789" label="EXO5" cy:nodeId="66703">
    <graphics y="-167.4662531515537" x="189.10404197991318" z="0.0"/>
  </node>
  <node id="84765" label="MED19" cy:nodeId="67727">
    <graphics y="508.56237233672755" x="216.38419334710068" z="0.0"/>
  </node>
  <node id="85757" label="NDUFA8" cy:nodeId="66735">
    <graphics y="273.7259160378994" x="-61.79161079108292" z="0.0"/>
  </node>
  <node id="84733" label="DSC2" cy:nodeId="67759">
    <graphics y="301.9049931863369" x="-483.69066627203995" z="0.0"/>
  </node>
  <node id="85725" label="PSMC2" cy:nodeId="66767">
    <graphics y="-46.68657480682714" x="151.81348411858505" z="0.0"/>
  </node>
  <node id="84701" label="C10orf128" cy:nodeId="67791">
    <graphics y="269.9758855203213" x="417.67847435296005" z="0.0"/>
  </node>
  <node id="85693" label="GJA5" cy:nodeId="66799">
    <graphics y="264.82551015411036" x="-142.04501350104385" z="0.0"/>
  </node>
  <node id="84669" label="RPN1" cy:nodeId="67823">
    <graphics y="393.7907048562588" x="-13.581087185736237" z="0.0"/>
  </node>
  <node id="85661" label="MRPL36" cy:nodeId="66831">
    <graphics y="9.803362021786143" x="-72.70783240973526" z="0.0"/>
  </node>
  <node id="84637" label="GOLT1A" cy:nodeId="67855">
    <graphics y="-183.05579172577245" x="-427.4077988403993" z="0.0"/>
  </node>
  <node id="85629" label="LAMTOR2" cy:nodeId="66863">
    <graphics y="124.16660512481349" x="-42.690033032293854" z="0.0"/>
  </node>
  <node id="84605" label="C11orf70" cy:nodeId="67887">
    <graphics y="-435.63208567108495" x="-291.41173560797745" z="0.0"/>
  </node>
  <node id="85597" label="HM13" cy:nodeId="66895">
    <graphics y="150.5561848977627" x="-22.033480717535554" z="0.0"/>
  </node>
  <node id="84573" label="ZNF575" cy:nodeId="67919">
    <graphics y="434.9876347878994" x="322.73377220452255" z="0.0"/>
  </node>
  <node id="85565" label="MRPL35" cy:nodeId="66927">
    <graphics y="-108.96997629608495" x="254.56851951897568" z="0.0"/>
  </node>
  <node id="84541" label="PRR15" cy:nodeId="67951">
    <graphics y="-625.99854074921" x="-703.2684250611024" z="0.0"/>
  </node>
  <node id="85533" label="PGBD4" cy:nodeId="66959">
    <graphics y="320.1952000955166" x="218.09085838616318" z="0.0"/>
  </node>
  <node id="84509" label="SORD" cy:nodeId="67983">
    <graphics y="-511.8060969015537" x="-226.34444434821182" z="0.0"/>
  </node>
  <node id="85501" label="RPUSD1" cy:nodeId="66991">
    <graphics y="101.89774716888087" x="56.02961723626083" z="0.0"/>
  </node>
  <node id="85469" label="UQCRC2" cy:nodeId="67023">
    <graphics y="98.61875928435938" x="537.7091750365538" z="0.0"/>
  </node>
  <node id="85437" label="OPLAH" cy:nodeId="67055">
    <graphics y="14.718774924618174" x="253.76474754631943" z="0.0"/>
  </node>
  <node id="85405" label="NSUN5" cy:nodeId="67087">
    <graphics y="26.762239585262705" x="180.14656822503036" z="0.0"/>
  </node>
  <node id="85373" label="ERF" cy:nodeId="67119">
    <graphics y="76.23273576293604" x="56.809898303155364" z="0.0"/>
  </node>
  <node id="85341" label="VARS" cy:nodeId="67151">
    <graphics y="47.1406689981045" x="-152.85836036383682" z="0.0"/>
  </node>
  <node id="85309" label="GUCD1" cy:nodeId="67183">
    <graphics y="106.70643819366114" x="331.2739943724913" z="0.0"/>
  </node>
  <node id="85277" label="METTL2A" cy:nodeId="67215">
    <graphics y="306.7676030496182" x="-354.1108017700868" z="0.0"/>
  </node>
  <node id="85245" label="ZNF691" cy:nodeId="67247">
    <graphics y="317.149637351376" x="299.87390892327255" z="0.0"/>
  </node>
  <node id="85213" label="C16orf95" cy:nodeId="67279">
    <graphics y="174.43903554473536" x="-339.2860947388368" z="0.0"/>
  </node>
  <node id="85181" label="AK8" cy:nodeId="67311">
    <graphics y="-674.5115412374912" x="-618.3334275025087" z="0.0"/>
  </node>
  <node id="85149" label="WDR66" cy:nodeId="67343">
    <graphics y="-708.3428400656162" x="-552.7648239868837" z="0.0"/>
  </node>
  <node id="85117" label="FAM154B" cy:nodeId="67375">
    <graphics y="-505.69385324920995" x="-645.95043189704" z="0.0"/>
  </node>
  <node id="85085" label="FBXW9" cy:nodeId="67407">
    <graphics y="-531.6951349874912" x="-326.67003638922745" z="0.0"/>
  </node>
  <node id="85053" label="GMEB2" cy:nodeId="67439">
    <graphics y="13.080869803768564" x="-624.59154517829" z="0.0"/>
  </node>
  <node id="86045" label="SAPCD2" cy:nodeId="66447">
    <graphics y="83.98617375884669" x="90.69155113518661" z="0.0"/>
  </node>
  <node id="85021" label="POU3F3" cy:nodeId="67471">
    <graphics y="-855.0763605734287" x="890.7587355834288" z="0.0"/>
  </node>
  <node id="86013" label="KCNK1" cy:nodeId="66479">
    <graphics y="118.49944890533106" x="-448.7250290650087" z="0.0"/>
  </node>
  <node id="84989" label="PSMD2" cy:nodeId="67503">
    <graphics y="-178.8665217062412" x="223.56266014397568" z="0.0"/>
  </node>
  <node id="85981" label="TMEM41A" cy:nodeId="66511">
    <graphics y="155.32286275420802" x="-221.0929489868837" z="0.0"/>
  </node>
  <node id="84957" label="LZTR1" cy:nodeId="67535">
    <graphics y="161.48238576446192" x="118.88169090569443" z="0.0"/>
  </node>
  <node id="85949" label="ATP5G3" cy:nodeId="66543">
    <graphics y="-83.99597727264745" x="-133.71331794440323" z="0.0"/>
  </node>
  <node id="84925" label="KIAA1279" cy:nodeId="67567">
    <graphics y="-158.85037790741308" x="-6.610134198065339" z="0.0"/>
  </node>
  <node id="85916" label="COQ9" cy:nodeId="66576">
    <graphics y="61.59511006866114" x="-23.201675488348542" z="0.0"/>
  </node>
  <node id="84892" label="PPT1" cy:nodeId="67600">
    <graphics y="189.29471791778224" x="467.86048118889755" z="0.0"/>
  </node>
  <node id="85884" label="TFAP4" cy:nodeId="66608">
    <graphics y="188.08962453399317" x="28.748489306573333" z="0.0"/>
  </node>
  <node id="84860" label="GSR" cy:nodeId="67632">
    <graphics y="-63.2664240499912" x="54.1588820678038" z="0.0"/>
  </node>
  <node id="85852" label="CCM2L" cy:nodeId="66640">
    <graphics y="383.3568669656338" x="228.47995750725693" z="0.0"/>
  </node>
  <node id="84828" label="ASCC2" cy:nodeId="67664">
    <graphics y="269.89911855254786" x="34.377586291436614" z="0.0"/>
  </node>
  <node id="85820" label="ITPA" cy:nodeId="66672">
    <graphics y="-16.19305216278417" x="262.7721938353819" z="0.0"/>
  </node>
  <node id="84796" label="C2orf47" cy:nodeId="67696">
    <graphics y="-48.71489511932714" x="465.2207717162413" z="0.0"/>
  </node>
  <node id="85788" label="FARSA" cy:nodeId="66704">
    <graphics y="91.73482335601466" x="290.96887962639755" z="0.0"/>
  </node>
  <node id="84764" label="GOPC" cy:nodeId="67728">
    <graphics y="125.62892735992091" x="537.7503737670226" z="0.0"/>
  </node>
  <node id="85756" label="TMEM261" cy:nodeId="66736">
    <graphics y="101.99080098662989" x="-168.21492774664932" z="0.0"/>
  </node>
  <node id="84732" label="PANK1" cy:nodeId="67760">
    <graphics y="354.0137273171963" x="303.3584670287413" z="0.0"/>
  </node>
  <node id="85724" label="SNUPN" cy:nodeId="66768">
    <graphics y="45.16781629119532" x="234.13184349358505" z="0.0"/>
  </node>
  <node id="84700" label="RAB10" cy:nodeId="67792">
    <graphics y="-252.18457590545995" x="239.3495558959288" z="0.0"/>
  </node>
  <node id="85692" label="PRR19" cy:nodeId="66800">
    <graphics y="230.37740529571192" x="42.48663322747177" z="0.0"/>
  </node>
  <node id="84668" label="SYNE4" cy:nodeId="67824">
    <graphics y="140.2870198587002" x="-454.76171119391495" z="0.0"/>
  </node>
  <node id="85660" label="FAM173B" cy:nodeId="66832">
    <graphics y="192.17379964385646" x="-126.98751838385635" z="0.0"/>
  </node>
  <node id="84636" label="SGPP2" cy:nodeId="67856">
    <graphics y="57.78736032043116" x="-373.6453171509462" z="0.0"/>
  </node>
  <node id="85628" label="EXOSC5" cy:nodeId="66864">
    <graphics y="-55.18091379608495" x="115.33042137444443" z="0.0"/>
  </node>
  <node id="84604" label="PSMB5" cy:nodeId="67888">
    <graphics y="-302.31604563202245" x="217.52385704338974" z="0.0"/>
  </node>
  <node id="85596" label="PAK6" cy:nodeId="66896">
    <graphics y="145.140115867001" x="-261.6728287476259" z="0.0"/>
  </node>
  <node id="84572" label="PSMB10" cy:nodeId="67920">
    <graphics y="428.6152898171963" x="-31.072799755926667" z="0.0"/>
  </node>
  <node id="85564" label="C16orf70" cy:nodeId="66928">
    <graphics y="166.86312306914942" x="91.37162010491318" z="0.0"/>
  </node>
  <node id="84540" label="TTC18" cy:nodeId="67952">
    <graphics y="-592.60059153046" x="-583.43920142829" z="0.0"/>
  </node>
  <node id="85532" label="METTL6" cy:nodeId="66960">
    <graphics y="-153.99255930389745" x="165.22782127678818" z="0.0"/>
  </node>
  <node id="84508" label="HEATR2" cy:nodeId="67984">
    <graphics y="-533.8241022726475" x="-232.01839454352432" z="0.0"/>
  </node>
  <node id="85500" label="TMEM150B" cy:nodeId="66992">
    <graphics y="-50.725484718936514" x="-253.74691016852432" z="0.0"/>
  </node>
  <node id="85468" label="RAP2B" cy:nodeId="67024">
    <graphics y="242.1584569314541" x="-33.600178791876374" z="0.0"/>
  </node>
  <node id="85436" label="ZBTB9" cy:nodeId="67056">
    <graphics y="326.9203435281338" x="275.1000136596007" z="0.0"/>
  </node>
  <node id="85404" label="DBI" cy:nodeId="67088">
    <graphics y="476.24779714141505" x="155.51308433831161" z="0.0"/>
  </node>
  <node id="85372" label="PDIA6" cy:nodeId="67120">
    <graphics y="194.92324269805567" x="-107.71359260260635" z="0.0"/>
  </node>
  <node id="85340" label="CHID1" cy:nodeId="67152">
    <graphics y="231.40438283477442" x="-225.59842689215714" z="0.0"/>
  </node>
  <node id="85308" label="AK1" cy:nodeId="67184">
    <graphics y="313.7316533425869" x="-427.2671128052431" z="0.0"/>
  </node>
  <node id="85276" label="CYC1" cy:nodeId="67216">
    <graphics y="171.9035741189541" x="263.9501113158507" z="0.0"/>
  </node>
  <node id="85244" label="GALNT10" cy:nodeId="67248">
    <graphics y="-2.6135157247958887" x="177.82585899651474" z="0.0"/>
  </node>
  <node id="85212" label="PITX2" cy:nodeId="67280">
    <graphics y="120.83788884673731" x="110.22551719963974" z="0.0"/>
  </node>
  <node id="85180" label="DNALI1" cy:nodeId="67312">
    <graphics y="-707.83789621796" x="-487.2560654419618" z="0.0"/>
  </node>
  <node id="85148" label="ZMYND10" cy:nodeId="67344">
    <graphics y="-773.7061213156162" x="-415.5874253052431" z="0.0"/>
  </node>
  <node id="85116" label="CCDC151" cy:nodeId="67376">
    <graphics y="-724.2924250265537" x="-454.1234360474306" z="0.0"/>
  </node>
  <node id="85084" label="SPTBN2" cy:nodeId="67408">
    <graphics y="-410.1960810324131" x="-403.6516342896181" z="0.0"/>
  </node>
  <node id="85052" label="STAT1" cy:nodeId="67440">
    <graphics y="-49.582357277530264" x="-451.7577744263368" z="0.0"/>
  </node>
  <node id="86044" label="PDHB" cy:nodeId="66448">
    <graphics y="260.102029929501" x="190.07834617913193" z="0.0"/>
  </node>
  <node id="85020" label="POU4F2" cy:nodeId="67472">
    <graphics y="-778.8089045187412" x="906.3528670531554" z="0.0"/>
  </node>
  <node id="86012" label="MIS18A" cy:nodeId="66480">
    <graphics y="4.818460593563486" x="-21.885454251165925" z="0.0"/>
  </node>
  <node id="84988" label="KDM4A" cy:nodeId="67504">
    <graphics y="203.67643178496974" x="-290.1723252075868" z="0.0"/>
  </node>
  <node id="85980" label="GSTA4" cy:nodeId="66512">
    <graphics y="-3.099698891299795" x="-132.07393653571182" z="0.0"/>
  </node>
  <node id="84956" label="PEX3" cy:nodeId="67536">
    <graphics y="82.22791875396388" x="-75.29051215827042" z="0.0"/>
  </node>
  <node id="85948" label="CLN6" cy:nodeId="66544">
    <graphics y="202.5721532205166" x="92.83541099846786" z="0.0"/>
  </node>
  <node id="84924" label="CHRNB1" cy:nodeId="67568">
    <graphics y="66.67082704101222" x="265.1591567260069" z="0.0"/>
  </node>
  <node id="85915" label="C3AR1" cy:nodeId="66577">
    <graphics y="154.98153127227442" x="-126.71850593268448" z="0.0"/>
  </node>
  <node id="84891" label="BRD8" cy:nodeId="67601">
    <graphics y="293.6851140359463" x="-166.63768775641495" z="0.0"/>
  </node>
  <node id="85883" label="TMEM79" cy:nodeId="66609">
    <graphics y="107.26794637237208" x="219.23097984612411" z="0.0"/>
  </node>
  <node id="84859" label="PAK1IP1" cy:nodeId="67633">
    <graphics y="334.7284489968838" x="70.40641014397568" z="0.0"/>
  </node>
  <node id="85851" label="C1orf53" cy:nodeId="66641">
    <graphics y="155.93471730743067" x="-57.13033683478409" z="0.0"/>
  </node>
  <node id="84827" label="ZNF576" cy:nodeId="67665">
    <graphics y="307.73514760528224" x="177.17229454338974" z="0.0"/>
  </node>
  <node id="85819" label="PREP" cy:nodeId="66673">
    <graphics y="506.2620488503994" x="358.6603774291319" z="0.0"/>
  </node>
  <node id="84795" label="RBBP5" cy:nodeId="67697">
    <graphics y="235.1812535623135" x="333.9596938353819" z="0.0"/>
  </node>
  <node id="85787" label="TOR4A" cy:nodeId="66705">
    <graphics y="417.9822331765713" x="83.2361525756163" z="0.0"/>
  </node>
  <node id="84763" label="WIBG" cy:nodeId="67729">
    <graphics y="203.17409719024317" x="524.6153640013976" z="0.0"/>
  </node>
  <node id="85755" label="DAK" cy:nodeId="66737">
    <graphics y="277.55687917266505" x="112.83115379631943" z="0.0"/>
  </node>
  <node id="84731" label="VWA9" cy:nodeId="67761">
    <graphics y="-315.93799387420995" x="-105.31188209235245" z="0.0"/>
  </node>
  <node id="85723" label="ADORA3" cy:nodeId="66769">
    <graphics y="428.0277348855557" x="65.63181297600693" z="0.0"/>
  </node>
  <node id="84699" label="POP7" cy:nodeId="67793">
    <graphics y="-183.38269602264745" x="86.6612014037413" z="0.0"/>
  </node>
  <node id="85691" label="TAF6L" cy:nodeId="66801">
    <graphics y="165.26876271758692" x="-56.4426747101503" z="0.0"/>
  </node>
  <node id="84667" label="RTKN" cy:nodeId="67825">
    <graphics y="-290.8319452902256" x="-76.50315864264542" z="0.0"/>
  </node>
  <node id="85659" label="CD180" cy:nodeId="66833">
    <graphics y="106.89526570830958" x="261.83338157952255" z="0.0"/>
  </node>
  <node id="84635" label="PRODH" cy:nodeId="67857">
    <graphics y="-141.43088327850683" x="-340.1998825806337" z="0.0"/>
  </node>
  <node id="85627" label="ATP6V1F" cy:nodeId="66865">
    <graphics y="16.643839011532236" x="372.75904075921005" z="0.0"/>
  </node>
  <node id="84603" label="MTX1" cy:nodeId="67889">
    <graphics y="-335.7229365011631" x="182.78911583245224" z="0.0"/>
  </node>
  <node id="85595" label="CENPI" cy:nodeId="66897">
    <graphics y="125.61876882110255" x="285.9396132689757" z="0.0"/>
  </node>
  <node id="84571" label="GLI4" cy:nodeId="67921">
    <graphics y="579.4556218484463" x="-39.78089912116104" z="0.0"/>
  </node>
  <node id="85563" label="B4GALT7" cy:nodeId="66929">
    <graphics y="396.4813481668057" x="102.40726463616318" z="0.0"/>
  </node>
  <node id="84539" label="RPGRIP1L" cy:nodeId="67953">
    <graphics y="-601.8980768820225" x="-397.8115769165712" z="0.0"/>
  </node>
  <node id="85531" label="GMIP" cy:nodeId="66961">
    <graphics y="385.0269109109463" x="168.94582359612411" z="0.0"/>
  </node>
  <node id="84507" label="TJP3" cy:nodeId="67985">
    <graphics y="-500.90076242889745" x="-757.4205246704774" z="0.0"/>
  </node>
  <node id="85499" label="SFXN2" cy:nodeId="66993">
    <graphics y="191.2498113015713" x="-96.34925086676651" z="0.0"/>
  </node>
  <node id="85467" label="FUT8" cy:nodeId="67025">
    <graphics y="340.03051198516505" x="312.7616652709288" z="0.0"/>
  </node>
  <node id="85435" label="DOPEY2" cy:nodeId="67057">
    <graphics y="7.686441550594736" x="350.33643333733505" z="0.0"/>
  </node>
  <node id="85403" label="GEMIN6" cy:nodeId="67089">
    <graphics y="-103.15994821991308" x="-40.080623700018464" z="0.0"/>
  </node>
  <node id="85371" label="MVB12B" cy:nodeId="67121">
    <graphics y="-23.30925547088964" x="85.6767043334288" z="0.0"/>
  </node>
  <node id="85339" label="ETV3" cy:nodeId="67153">
    <graphics y="122.32852757964747" x="72.43650047600693" z="0.0"/>
  </node>
  <node id="85307" label="USF2" cy:nodeId="67185">
    <graphics y="2.7988149026455176" x="-41.689754559393464" z="0.0"/>
  </node>
  <node id="85275" label="KLF13" cy:nodeId="67217">
    <graphics y="-418.8147333761631" x="10.249545977715911" z="0.0"/>
  </node>
  <node id="85243" label="CYP51A1" cy:nodeId="67249">
    <graphics y="255.41393483672755" x="-231.33332069098526" z="0.0"/>
  </node>
  <node id="85211" label="GTSE1" cy:nodeId="67281">
    <graphics y="136.7021046975674" x="51.60938255608505" z="0.0"/>
  </node>
  <node id="85179" label="ETV2" cy:nodeId="67313">
    <graphics y="60.857236991268564" x="52.55185692131943" z="0.0"/>
  </node>
  <node id="85147" label="SPEF1" cy:nodeId="67345">
    <graphics y="-666.849370827335" x="-529.2264328736024" z="0.0"/>
  </node>
  <node id="85115" label="WDR16" cy:nodeId="67377">
    <graphics y="-563.5941828390537" x="-736.206535412665" z="0.0"/>
  </node>
  <node id="85083" label="IGSF9" cy:nodeId="67409">
    <graphics y="-531.3447931906162" x="-421.58617408453995" z="0.0"/>
  </node>
  <node id="85051" label="TCFL5" cy:nodeId="67441">
    <graphics y="-94.93486582245214" x="-371.01659400641495" z="0.0"/>
  </node>
  <node id="86043" label="MPDU1" cy:nodeId="66449">
    <graphics y="230.60485280547755" x="46.39452354729599" z="0.0"/>
  </node>
  <node id="85019" label="ZFHX3" cy:nodeId="67473">
    <graphics y="-731.2107294699131" x="959.5985793334288" z="0.0"/>
  </node>
  <node id="86011" label="MEF2BNB" cy:nodeId="66481">
    <graphics y="38.98018086944239" x="222.48320762932724" z="0.0"/>
  </node>
  <node id="84987" label="HDDC3" cy:nodeId="67505">
    <graphics y="419.6570378640713" x="6.405456469659271" z="0.0"/>
  </node>
  <node id="85979" label="MFSD2A" cy:nodeId="66513">
    <graphics y="96.84877599273341" x="-90.44638068854385" z="0.0"/>
  </node>
  <node id="84955" label="DEPTOR" cy:nodeId="67537">
    <graphics y="-167.51436411346776" x="294.5182265502257" z="0.0"/>
  </node>
  <node id="85947" label="SLC46A1" cy:nodeId="66545">
    <graphics y="26.53205312286036" x="138.68469993889755" z="0.0"/>
  </node>
  <node id="84923" label="DBR1" cy:nodeId="67569">
    <graphics y="333.7596989968838" x="-134.24607093512589" z="0.0"/>
  </node>
  <node id="85914" label="THEM6" cy:nodeId="66578">
    <graphics y="215.46523488555567" x="-85.81198890387589" z="0.0"/>
  </node>
  <node id="84890" label="SPDYE3" cy:nodeId="67602">
    <graphics y="-4.925268044131826" x="-172.44954688727432" z="0.0"/>
  </node>
  <node id="85882" label="FAM173A" cy:nodeId="66610">
    <graphics y="36.00697911773341" x="145.54114525139755" z="0.0"/>
  </node>
  <node id="84858" label="GDPGP1" cy:nodeId="67634">
    <graphics y="-119.47469126190526" x="367.9173049193663" z="0.0"/>
  </node>
  <node id="85850" label="AP5S1" cy:nodeId="66642">
    <graphics y="7.957246909481455" x="17.379928515557708" z="0.0"/>
  </node>
  <node id="84826" label="NUFIP1" cy:nodeId="67666">
    <graphics y="383.8658696511807" x="-107.94809730231339" z="0.0"/>
  </node>
  <node id="85818" label="APOA1BP" cy:nodeId="66674">
    <graphics y="76.32627500091212" x="24.534229205254974" z="0.0"/>
  </node>
  <node id="84794" label="ICMT" cy:nodeId="67698">
    <graphics y="-111.7162531515537" x="201.671134875421" z="0.0"/>
  </node>
  <node id="85786" label="UQCRC1" cy:nodeId="66706">
    <graphics y="252.6153355935635" x="276.6019057494444" z="0.0"/>
  </node>
  <node id="84762" label="L3MBTL2" cy:nodeId="67730">
    <graphics y="-88.48698984588964" x="101.8975295287413" z="0.0"/>
  </node>
  <node id="85754" label="MRPS23" cy:nodeId="66738">
    <graphics y="-40.386937966006826" x="-96.95689780890518" z="0.0"/>
  </node>
  <node id="84730" label="FDPS" cy:nodeId="67762">
    <graphics y="270.5349370339932" x="517.2779006224913" z="0.0"/>
  </node>
  <node id="85722" label="CPT2" cy:nodeId="66770">
    <graphics y="-26.54858957733495" x="-151.8534699219423" z="0.0"/>
  </node>
  <node id="84698" label="RMDN2" cy:nodeId="67794">
    <graphics y="-225.99472605194433" x="100.32450096428818" z="0.0"/>
  </node>
  <node id="85690" label="VPS33A" cy:nodeId="66802">
    <graphics y="-87.71530710663183" x="68.82358543694443" z="0.0"/>
  </node>
  <node id="84666" label="ARV1" cy:nodeId="67826">
    <graphics y="-307.71216379608495" x="11.63625709832138" z="0.0"/>
  </node>
  <node id="85658" label="FASTKD3" cy:nodeId="66834">
    <graphics y="394.9804021218838" x="-320.6303025025087" z="0.0"/>
  </node>
  <node id="84634" label="BEND3" cy:nodeId="67858">
    <graphics y="-82.06834970917089" x="-268.3449021118837" z="0.0"/>
  </node>
  <node id="85626" label="SRD5A1" cy:nodeId="66866">
    <graphics y="-82.79930674042089" x="257.9911879760069" z="0.0"/>
  </node>
  <node id="84602" label="NCBP2" cy:nodeId="67890">
    <graphics y="-406.91419016327245" x="247.67575828850693" z="0.0"/>
  </node>
  <node id="85594" label="STT3A" cy:nodeId="66898">
    <graphics y="126.65974248443263" x="-41.19367225348526" z="0.0"/>
  </node>
  <node id="84570" label="TYMP" cy:nodeId="67922">
    <graphics y="588.0712224343838" x="-87.01065452277237" z="0.0"/>
  </node>
  <node id="85562" label="PHB" cy:nodeId="66930">
    <graphics y="123.31976522002833" x="357.6983107787413" z="0.0"/>
  </node>
  <node id="84538" label="CCDC113" cy:nodeId="67954">
    <graphics y="-629.5430353781162" x="-682.2708054321962" z="0.0"/>
  </node>
  <node id="85530" label="RPA3" cy:nodeId="66962">
    <graphics y="-300.0989130636631" x="-117.62361915289932" z="0.0"/>
  </node>
  <node id="84506" label="LPAR3" cy:nodeId="67986">
    <graphics y="-678.73242746796" x="-804.905265881415" z="0.0"/>
  </node>
  <node id="85498" label="TMEM164" cy:nodeId="66994">
    <graphics y="-65.88223825897558" x="-143.28493507086807" z="0.0"/>
  </node>
  <node id="85466" label="NEU1" cy:nodeId="67026">
    <graphics y="-55.10075937713964" x="497.8640822631163" z="0.0"/>
  </node>
  <node id="85434" label="DPEP2" cy:nodeId="67058">
    <graphics y="199.4771062234463" x="503.56470482171005" z="0.0"/>
  </node>
  <node id="85402" label="SWSAP1" cy:nodeId="67090">
    <graphics y="-144.53211008514745" x="63.05411522210068" z="0.0"/>
  </node>
  <node id="85370" label="ETV1" cy:nodeId="67122">
    <graphics y="103.81349004302638" x="21.616058276299896" z="0.0"/>
  </node>
  <node id="85338" label="IMPDH2" cy:nodeId="67154">
    <graphics y="227.83661855254786" x="506.7969435912413" z="0.0"/>
  </node>
  <node id="85306" label="ACOXL" cy:nodeId="67186">
    <graphics y="-294.40479074920995" x="-313.66185767828995" z="0.0"/>
  </node>
  <node id="85274" label="KIAA1522" cy:nodeId="67218">
    <graphics y="-181.121847023624" x="-219.31920631110245" z="0.0"/>
  </node>
  <node id="85242" label="SDHB" cy:nodeId="67250">
    <graphics y="-347.4749506613193" x="-12.942150189276276" z="0.0"/>
  </node>
  <node id="85210" label="CHEK1" cy:nodeId="67282">
    <graphics y="76.30200017486231" x="67.24100487053818" z="0.0"/>
  </node>
  <node id="85178" label="SIX5" cy:nodeId="67314">
    <graphics y="225.47570241485255" x="90.37093345940536" z="0.0"/>
  </node>
  <node id="85146" label="LRRC23" cy:nodeId="67346">
    <graphics y="-578.5990046163975" x="-694.766105725165" z="0.0"/>
  </node>
  <node id="85114" label="ADGB" cy:nodeId="67378">
    <graphics y="-538.66553293671" x="-467.9968491333681" z="0.0"/>
  </node>
  <node id="85082" label="SPA17" cy:nodeId="67410">
    <graphics y="-584.2879084249912" x="-629.1926804321962" z="0.0"/>
  </node>
  <node id="85050" label="CENPB" cy:nodeId="67442">
    <graphics y="-197.56168161835058" x="-401.8060837525087" z="0.0"/>
  </node>
  <node id="86042" label="TMEM163" cy:nodeId="66450">
    <graphics y="175.39673055205958" x="-193.3580399292665" z="0.0"/>
  </node>
  <node id="85018" label="ZNF219" cy:nodeId="67474">
    <graphics y="740.4370671609463" x="155.59009544671005" z="0.0"/>
  </node>
  <node id="86010" label="FAM136A" cy:nodeId="66482">
    <graphics y="88.54263700042384" x="-26.689855648871003" z="0.0"/>
  </node>
  <node id="84986" label="SMG8" cy:nodeId="67506">
    <graphics y="-71.69231211151464" x="278.3607558471007" z="0.0"/>
  </node>
  <node id="85978" label="BEX2" cy:nodeId="66514">
    <graphics y="134.0399953225674" x="-277.26541907965714" z="0.0"/>
  </node>
  <node id="84954" label="ERP29" cy:nodeId="67538">
    <graphics y="-310.35706125702245" x="-35.80412299811417" z="0.0"/>
  </node>
  <node id="85946" label="ACADS" cy:nodeId="66546">
    <graphics y="334.0558110574307" x="447.50806419671005" z="0.0"/>
  </node>
  <node id="84922" label="HPS1" cy:nodeId="67570">
    <graphics y="192.5932713845791" x="8.036277697686614" z="0.0"/>
  </node>
  <node id="85913" label="C1orf85" cy:nodeId="66579">
    <graphics y="134.28219045196192" x="170.1636885863585" z="0.0"/>
  </node>
  <node id="84889" label="KBTBD7" cy:nodeId="67603">
    <graphics y="33.884927878719736" x="-76.95254142462784" z="0.0"/>
  </node>
  <node id="85881" label="COX5A" cy:nodeId="66611">
    <graphics y="240.21853078399317" x="-18.713371350164948" z="0.0"/>
  </node>
  <node id="84857" label="CR1" cy:nodeId="67635">
    <graphics y="-328.90076242889745" x="105.49834434807724" z="0.0"/>
  </node>
  <node id="85849" label="MDH2" cy:nodeId="66643">
    <graphics y="-154.95610605682714" x="127.68215172112411" z="0.0"/>
  </node>
  <node id="84825" label="PPL" cy:nodeId="67667">
    <graphics y="263.7143651345791" x="-217.85668189703995" z="0.0"/>
  </node>
  <node id="85817" label="ICT1" cy:nodeId="66675">
    <graphics y="138.63460744414942" x="158.32024376213974" z="0.0"/>
  </node>
  <node id="84793" label="DHTKD1" cy:nodeId="67699">
    <graphics y="-35.18629251922948" x="-138.4671707886415" z="0.0"/>
  </node>
  <node id="85785" label="MRPL44" cy:nodeId="66707">
    <graphics y="38.801191459042" x="147.92099754631943" z="0.0"/>
  </node>
  <node id="84761" label="NAIF1" cy:nodeId="67731">
    <graphics y="59.769638190609385" x="280.3192519408507" z="0.0"/>
  </node>
  <node id="85753" label="FTSJ2" cy:nodeId="66739">
    <graphics y="7.888132224422861" x="100.34233848870224" z="0.0"/>
  </node>
  <node id="84729" label="ABT1" cy:nodeId="67763">
    <graphics y="593.2042180398525" x="344.02344505608505" z="0.0"/>
  </node>
  <node id="85721" label="ATPAF1" cy:nodeId="66771">
    <graphics y="-30.60075937713964" x="189.71816246331161" z="0.0"/>
  </node>
  <node id="84697" label="DHFR" cy:nodeId="67795">
    <graphics y="199.7781087258877" x="-164.59020240485245" z="0.0"/>
  </node>
  <node id="85689" label="GEMIN7" cy:nodeId="66803">
    <graphics y="370.92455495391505" x="191.14961998284286" z="0.0"/>
  </node>
  <node id="84665" label="YDJC" cy:nodeId="67827">
    <graphics y="89.15634168182032" x="599.8651198607726" z="0.0"/>
  </node>
  <node id="85657" label="CENPBD1" cy:nodeId="66835">
    <graphics y="249.34401906524317" x="193.2045363646788" z="0.0"/>
  </node>
  <node id="84633" label="C12orf49" cy:nodeId="67859">
    <graphics y="-215.70059763397558" x="-406.69701392828995" z="0.0"/>
  </node>
  <node id="85625" label="KCTD14" cy:nodeId="66867">
    <graphics y="238.60897267852442" x="-358.4159165161806" z="0.0"/>
  </node>
  <node id="84601" label="MCM3" cy:nodeId="67891">
    <graphics y="28.014097342831064" x="221.45838157952255" z="0.0"/>
  </node>
  <node id="85593" label="ALG5" cy:nodeId="66899">
    <graphics y="159.49167073760646" x="-40.89351279913956" z="0.0"/>
  </node>
  <node id="84569" label="CBX8" cy:nodeId="67923">
    <graphics y="459.34789479766505" x="-292.8938828247743" z="0.0"/>
  </node>
  <node id="85561" label="ACOT1" cy:nodeId="66931">
    <graphics y="-77.68401133026464" x="-237.07627113043839" z="0.0"/>
  </node>
  <node id="84537" label="C20orf26" cy:nodeId="67955">
    <graphics y="-573.9566095968662" x="-549.7153855103212" z="0.0"/>
  </node>
  <node id="85529" label="PSMD14" cy:nodeId="66963">
    <graphics y="-93.93619333710058" x="181.1542433959288" z="0.0"/>
  </node>
  <node id="84505" label="KIAA0408" cy:nodeId="67987">
    <graphics y="121.80504811797755" x="-544.1736069458681" z="0.0"/>
  </node>
  <node id="85497" label="BRI3BP" cy:nodeId="66995">
    <graphics y="-31.0883234640537" x="-58.61570174872452" z="0.0"/>
  </node>
  <node id="85465" label="SLC25A24" cy:nodeId="67027">
    <graphics y="-113.80553232635839" x="164.09946434319443" z="0.0"/>
  </node>
  <node id="85433" label="PLEK2" cy:nodeId="67059">
    <graphics y="401.3537846902432" x="372.8365248900694" z="0.0"/>
  </node>
  <node id="85401" label="TWF2" cy:nodeId="67091">
    <graphics y="116.10695851836817" x="195.7429885131163" z="0.0"/>
  </node>
  <node id="85369" label="FCGR1A" cy:nodeId="67123">
    <graphics y="192.65902150664942" x="298.9088820678038" z="0.0"/>
  </node>
  <node id="85337" label="ETV4" cy:nodeId="67155">
    <graphics y="75.13776982818263" x="-3.3969002503114325" z="0.0"/>
  </node>
  <node id="85305" label="MMAB" cy:nodeId="67187">
    <graphics y="222.45392812286036" x="322.97730247796005" z="0.0"/>
  </node>
  <node id="85273" label="RAB20" cy:nodeId="67219">
    <graphics y="-229.58237253631933" x="-384.54479224860245" z="0.0"/>
  </node>
  <node id="85241" label="PRDX3" cy:nodeId="67251">
    <graphics y="-313.9109247824131" x="510.24805443108505" z="0.0"/>
  </node>
  <node id="85209" label="HSPA12B" cy:nodeId="67283">
    <graphics y="491.6670476296963" x="232.27808372796005" z="0.0"/>
  </node>
  <node id="85177" label="APRT" cy:nodeId="67315">
    <graphics y="429.33617604766505" x="315.0955580931944" z="0.0"/>
  </node>
  <node id="85145" label="CCNO" cy:nodeId="67347">
    <graphics y="-588.4693659445225" x="-346.61095435797745" z="0.0"/>
  </node>
  <node id="85113" label="RIBC1" cy:nodeId="67379">
    <graphics y="-722.1045588156162" x="-668.6572800415712" z="0.0"/>
  </node>
  <node id="85081" label="CCDC24" cy:nodeId="67411">
    <graphics y="-507.1915949484287" x="-380.3937302368837" z="0.0"/>
  </node>
  <node id="85049" label="E2F1" cy:nodeId="67443">
    <graphics y="81.75710500274317" x="-357.0581894653993" z="0.0"/>
  </node>
  <node id="86041" label="TIMELESS" cy:nodeId="66451">
    <graphics y="102.14443791900294" x="79.57314293206161" z="0.0"/>
  </node>
  <node id="85017" label="CENPA" cy:nodeId="67475">
    <graphics y="733.6885320046963" x="69.14232628167099" z="0.0"/>
  </node>
  <node id="86009" label="C21orf33" cy:nodeId="66483">
    <graphics y="252.48407949004786" x="-198.151619030829" z="0.0"/>
  </node>
  <node id="84985" label="NOP56" cy:nodeId="67507">
    <graphics y="89.81187070403712" x="-133.29501350104385" z="0.0"/>
  </node>
  <node id="85977" label="DDOST" cy:nodeId="66515">
    <graphics y="35.37824834380763" x="-20.65735347449356" z="0.0"/>
  </node>
  <node id="84953" label="PTPLAD1" cy:nodeId="67539">
    <graphics y="300.3809911111416" x="344.24695579827255" z="0.0"/>
  </node>
  <node id="85945" label="COPG1" cy:nodeId="66547">
    <graphics y="-39.564535011905264" x="64.20083610833115" z="0.0"/>
  </node>
  <node id="84921" label="MRPL20" cy:nodeId="67571">
    <graphics y="261.48456777129786" x="-93.05787666022354" z="0.0"/>
  </node>
  <node id="85912" label="GBA" cy:nodeId="66580">
    <graphics y="119.5231038430752" x="-174.63631446539932" z="0.0"/>
  </node>
  <node id="84888" label="SMPDL3B" cy:nodeId="67604">
    <graphics y="-211.9330500265537" x="151.81978599846786" z="0.0"/>
  </node>
  <node id="85880" label="LYL1" cy:nodeId="66612">
    <graphics y="-160.39575754608495" x="124.74485008538193" z="0.0"/>
  </node>
  <node id="84856" label="ZSWIM3" cy:nodeId="67636">
    <graphics y="99.53620160613673" x="412.2947768431944" z="0.0"/>
  </node>
  <node id="85848" label="RPP40" cy:nodeId="66644">
    <graphics y="151.7668019631924" x="-39.30537803351456" z="0.0"/>
  </node>
  <node id="84824" label="TALDO1" cy:nodeId="67668">
    <graphics y="-13.731840004581045" x="327.97156517327255" z="0.0"/>
  </node>
  <node id="85816" label="SPRYD4" cy:nodeId="66676">
    <graphics y="-71.20021616424901" x="-47.171215130682526" z="0.0"/>
  </node>
  <node id="84792" label="ADI1" cy:nodeId="67700">
    <graphics y="439.4947759011807" x="135.3048781615538" z="0.0"/>
  </node>
  <node id="85784" label="LEO1" cy:nodeId="66708">
    <graphics y="375.0661259988369" x="-29.829092099066315" z="0.0"/>
  </node>
  <node id="84760" label="PSMD9" cy:nodeId="67732">
    <graphics y="70.35279668365138" x="494.07935325921005" z="0.0"/>
  </node>
  <node id="85752" label="PCBD2" cy:nodeId="66740">
    <graphics y="-21.026456703799795" x="137.537834094171" z="0.0"/>
  </node>
  <node id="84728" label="PALMD" cy:nodeId="67764">
    <graphics y="581.3211003640713" x="-130.48150642096573" z="0.0"/>
  </node>
  <node id="85720" label="IDH1" cy:nodeId="66772">
    <graphics y="191.7551366189541" x="223.99179832756943" z="0.0"/>
  </node>
  <node id="84696" label="ITPK1" cy:nodeId="67796">
    <graphics y="-155.56958567108495" x="-106.9596253174501" z="0.0"/>
  </node>
  <node id="85688" label="IGSF6" cy:nodeId="66804">
    <graphics y="214.8032780984463" x="-121.48287208258682" z="0.0"/>
  </node>
  <node id="84664" label="PIH1D1" cy:nodeId="67828">
    <graphics y="499.0667363503994" x="343.2273940306944" z="0.0"/>
  </node>
  <node id="85656" label="COX10" cy:nodeId="66836">
    <graphics y="276.7891179421963" x="224.20676414788193" z="0.0"/>
  </node>
  <node id="84632" label="CCDC101" cy:nodeId="67860">
    <graphics y="-213.12573801483495" x="-492.3430710571962" z="0.0"/>
  </node>
  <node id="85624" label="C5" cy:nodeId="66868">
    <graphics y="15.25030721221583" x="-225.14656837164932" z="0.0"/>
  </node>
  <node id="84600" label="FKBPL" cy:nodeId="67892">
    <graphics y="-267.7962397238193" x="277.1088637572569" z="0.0"/>
  </node>
  <node id="85592" label="TSPAN3" cy:nodeId="66900">
    <graphics y="-149.37940012420995" x="-202.53586585700089" z="0.0"/>
  </node>
  <node id="84568" label="ZMYND8" cy:nodeId="67924">
    <graphics y="-104.67259775604589" x="-623.681144787665" z="0.0"/>
  </node>
  <node id="85560" label="MYO1F" cy:nodeId="66932">
    <graphics y="109.15411580596583" x="502.0928420287413" z="0.0"/>
  </node>
  <node id="84536" label="CDH26" cy:nodeId="67956">
    <graphics y="-620.1607721945225" x="-333.9643173950868" z="0.0"/>
  </node>
  <node id="85528" label="INTS7" cy:nodeId="66964">
    <graphics y="-66.27882944549901" x="215.07570640862411" z="0.0"/>
  </node>
  <node id="84504" label="SLIT2" cy:nodeId="67988">
    <graphics y="-833.2743281027256" x="1040.05111687005" z="0.0"/>
  </node>
  <node id="85496" label="NUDT8" cy:nodeId="66996">
    <graphics y="34.684934745174814" x="130.81674949944443" z="0.0"/>
  </node>
  <node id="85464" label="ELMO3" cy:nodeId="67028">
    <graphics y="35.3721257546963" x="315.5015334349913" z="0.0"/>
  </node>
  <node id="85432" label="TMEM45B" cy:nodeId="67060">
    <graphics y="-174.8531702658115" x="189.8350295287413" z="0.0"/>
  </node>
  <node id="85400" label="GCSH" cy:nodeId="67092">
    <graphics y="-227.82800852264745" x="46.89115135491318" z="0.0"/>
  </node>
  <node id="85368" label="BRCA1" cy:nodeId="67124">
    <graphics y="73.03139699493067" x="6.675064013604583" z="0.0"/>
  </node>
  <node id="85336" label="SMYD5" cy:nodeId="67156">
    <graphics y="483.0646306375088" x="89.11509697258896" z="0.0"/>
  </node>
  <node id="85304" label="TFCP2L1" cy:nodeId="67188">
    <graphics y="-153.5785578390537" x="-242.78830726325089" z="0.0"/>
  </node>
  <node id="85272" label="EEF1E1" cy:nodeId="67220">
    <graphics y="-182.7865656515537" x="30.554183886651458" z="0.0"/>
  </node>
  <node id="85240" label="LGMN" cy:nodeId="67252">
    <graphics y="-204.77649485077245" x="-209.432869030829" z="0.0"/>
  </node>
  <node id="85208" label="CDCA4" cy:nodeId="67284">
    <graphics y="179.0454655984463" x="-65.42212684332901" z="0.0"/>
  </node>
  <node id="85176" label="ABHD11" cy:nodeId="67316">
    <graphics y="-266.7585199972568" x="-51.387956692572175" z="0.0"/>
  </node>
  <node id="85144" label="TSPAN1" cy:nodeId="67348">
    <graphics y="-579.03076731171" x="-262.7409439820009" z="0.0"/>
  </node>
  <node id="85112" label="RAB36" cy:nodeId="67380">
    <graphics y="-565.7110651632725" x="-482.8030625122743" z="0.0"/>
  </node>
  <node id="85080" label="RUVBL2" cy:nodeId="67412">
    <graphics y="-535.54492746796" x="-666.8606491821962" z="0.0"/>
  </node>
  <node id="85048" label="TFDP1" cy:nodeId="67444">
    <graphics y="185.73986257110255" x="-535.7431870239931" z="0.0"/>
  </node>
  <node id="86040" label="HMMR" cy:nodeId="66452">
    <graphics y="56.50401509795802" x="90.65989677727646" z="0.0"/>
  </node>
  <node id="85016" label="GINS1" cy:nodeId="67476">
    <graphics y="63.297945151668955" x="108.96392051995224" z="0.0"/>
  </node>
  <node id="86008" label="TONSL" cy:nodeId="66484">
    <graphics y="196.73977101836817" x="134.48551170647568" z="0.0"/>
  </node>
  <node id="84984" label="ZNF341" cy:nodeId="67508">
    <graphics y="75.4885865548672" x="-233.433601452704" z="0.0"/>
  </node>
  <node id="85976" label="FAM64A" cy:nodeId="66516">
    <graphics y="154.27640737090724" x="18.348812029962005" z="0.0"/>
  </node>
  <node id="84952" label="HDHD2" cy:nodeId="67540">
    <graphics y="-306.87415110077245" x="202.24173729241318" z="0.0"/>
  </node>
  <node id="85944" label="RNH1" cy:nodeId="66548">
    <graphics y="268.98893178496974" x="202.64961998284286" z="0.0"/>
  </node>
  <node id="84920" label="ACAD9" cy:nodeId="67572">
    <graphics y="507.37853444610255" x="57.351585314874114" z="0.0"/>
  </node>
  <node id="85911" label="NECAB1" cy:nodeId="66581">
    <graphics y="-41.15099131073339" x="-153.11789710700089" z="0.0"/>
  </node>
  <node id="84887" label="FAM78A" cy:nodeId="67605">
    <graphics y="457.74486745391505" x="51.02512352288193" z="0.0"/>
  </node>
  <node id="85879" label="FAM86A" cy:nodeId="66613">
    <graphics y="78.02895368133204" x="176.9169387084288" z="0.0"/>
  </node>
  <node id="84855" label="RPUSD2" cy:nodeId="67637">
    <graphics y="-323.5845698019443" x="339.7787856322569" z="0.0"/>
  </node>
  <node id="85847" label="ECHS1" cy:nodeId="66645">
    <graphics y="-30.601652016299795" x="170.402091906671" z="0.0"/>
  </node>
  <node id="84823" label="FBXL18" cy:nodeId="67669">
    <graphics y="74.61592687163966" x="59.13447563469833" z="0.0"/>
  </node>
  <node id="85815" label="TMEM223" cy:nodeId="66677">
    <graphics y="196.40732015166896" x="117.28418724358505" z="0.0"/>
  </node>
  <node id="84791" label="EAF2" cy:nodeId="67701">
    <graphics y="383.4774419168057" x="-170.49948890387589" z="0.0"/>
  </node>
  <node id="85783" label="ARHGEF19" cy:nodeId="66709">
    <graphics y="202.967752585751" x="-72.11228950202042" z="0.0"/>
  </node>
  <node id="84759" label="ASB8" cy:nodeId="67733">
    <graphics y="596.7208806375088" x="88.98128502190536" z="0.0"/>
  </node>
  <node id="85751" label="PLIN5" cy:nodeId="66741">
    <graphics y="-84.50790964569433" x="211.1189650756163" z="0.0"/>
  </node>
  <node id="84727" label="NUBP2" cy:nodeId="67765">
    <graphics y="506.7582341531338" x="435.06531517327255" z="0.0"/>
  </node>
  <node id="85719" label="DOK3" cy:nodeId="66773">
    <graphics y="-57.87828623260839" x="147.370841906671" z="0.0"/>
  </node>
  <node id="84695" label="PNPO" cy:nodeId="67797">
    <graphics y="-127.10713755096776" x="109.88925926506943" z="0.0"/>
  </node>
  <node id="85687" label="NUDT19" cy:nodeId="66805">
    <graphics y="191.74054921661036" x="-174.643562390204" z="0.0"/>
  </node>
  <node id="84663" label="SIGLEC7" cy:nodeId="67829">
    <graphics y="-37.95355020965917" x="431.6347426635069" z="0.0"/>
  </node>
  <node id="85655" label="C10orf2" cy:nodeId="66837">
    <graphics y="-67.22507273163183" x="65.1927184325499" z="0.0"/>
  </node>
  <node id="84631" label="EBNA1BP2" cy:nodeId="67861">
    <graphics y="-295.67676340545995" x="-36.40218360602432" z="0.0"/>
  </node>
  <node id="85623" label="MRPS11" cy:nodeId="66869">
    <graphics y="170.60514272246974" x="-100.27330787360245" z="0.0"/>
  </node>
  <node id="84599" label="PDSS2" cy:nodeId="67893">
    <graphics y="-326.7121332785068" x="214.531486437921" z="0.0"/>
  </node>
  <node id="85591" label="METTL7B" cy:nodeId="66901">
    <graphics y="-152.6251886984287" x="138.7532424193663" z="0.0"/>
  </node>
  <node id="84567" label="EIF2B3" cy:nodeId="67925">
    <graphics y="339.4303532937588" x="286.19873802483505" z="0.0"/>
  </node>
  <node id="85559" label="APMAP" cy:nodeId="66933">
    <graphics y="541.7051946023525" x="-44.02967269599014" z="0.0"/>
  </node>
  <node id="84535" label="PACRG" cy:nodeId="67957">
    <graphics y="-667.6796320578037" x="-412.4218369263368" z="0.0"/>
  </node>
  <node id="85527" label="GABPA" cy:nodeId="66965">
    <graphics y="118.76302922759669" x="77.17028801262802" z="0.0"/>
  </node>
  <node id="85495" label="NUDT16L1" cy:nodeId="66997">
    <graphics y="98.35191930328028" x="-51.20995338141495" z="0.0"/>
  </node>
  <node id="85463" label="SLAMF8" cy:nodeId="67029">
    <graphics y="-242.2703302999912" x="-44.43463142096573" z="0.0"/>
  </node>
  <node id="85431" label="CCNL2" cy:nodeId="67061">
    <graphics y="316.4168950418057" x="225.5914992553038" z="0.0"/>
  </node>
  <node id="85399" label="DCTN5" cy:nodeId="67093">
    <graphics y="47.09933866058009" x="-71.60111243903214" z="0.0"/>
  </node>
  <node id="85367" label="PCSK9" cy:nodeId="67125">
    <graphics y="-122.94362436737401" x="-247.20328529059464" z="0.0"/>
  </node>
  <node id="85335" label="NRF1" cy:nodeId="67157">
    <graphics y="134.60429585967677" x="93.71123497307724" z="0.0"/>
  </node>
  <node id="85303" label="FGFR2" cy:nodeId="67189">
    <graphics y="-241.3679865499912" x="-246.57700355231339" z="0.0"/>
  </node>
  <node id="85271" label="MLX" cy:nodeId="67221">
    <graphics y="-24.029325356143545" x="-107.59217078864151" z="0.0"/>
  </node>
  <node id="85239" label="PFKFB2" cy:nodeId="67253">
    <graphics y="35.20814717803614" x="-420.22789771735245" z="0.0"/>
  </node>
  <node id="85207" label="EPRS" cy:nodeId="67285">
    <graphics y="216.4602605203213" x="86.35121910393661" z="0.0"/>
  </node>
  <node id="85175" label="FKBP2" cy:nodeId="67317">
    <graphics y="556.2094060281338" x="-179.22875220953995" z="0.0"/>
  </node>
  <node id="85143" label="ROPN1L" cy:nodeId="67349">
    <graphics y="-439.9314631124912" x="-550.3607712525087" z="0.0"/>
  </node>
  <node id="85111" label="PPP1R32" cy:nodeId="67381">
    <graphics y="-708.9066218038975" x="-603.7578659790712" z="0.0"/>
  </node>
  <node id="85079" label="SLC44A4" cy:nodeId="67413">
    <graphics y="-583.4772394796787" x="-523.8885422486024" z="0.0"/>
  </node>
  <node id="85047" label="YBX1" cy:nodeId="67445">
    <graphics y="48.37712682281153" x="-613.6939011353212" z="0.0"/>
  </node>
  <node id="86039" label="FITM2" cy:nodeId="66453">
    <graphics y="258.48078359161036" x="-40.68233115851456" z="0.0"/>
  </node>
  <node id="85015" label="CRTAC1" cy:nodeId="67477">
    <graphics y="-132.58411203827245" x="-230.28975684821182" z="0.0"/>
  </node>
  <node id="86007" label="B3GNT8" cy:nodeId="66485">
    <graphics y="177.44923604522364" x="-110.64467628180557" z="0.0"/>
  </node>
  <node id="84983" label="ADCK5" cy:nodeId="67509">
    <graphics y="149.58795369659083" x="-163.25547034918839" z="0.0"/>
  </node>
  <node id="85975" label="TMEM116" cy:nodeId="66517">
    <graphics y="126.6095525125088" x="-164.02086646735245" z="0.0"/>
  </node>
  <node id="84951" label="ZNF319" cy:nodeId="67541">
    <graphics y="-135.625753273624" x="-378.25109107672745" z="0.0"/>
  </node>
  <node id="85943" label="ERAL1" cy:nodeId="66549">
    <graphics y="-150.59018503631933" x="262.2791518431944" z="0.0"/>
  </node>
  <node id="84919" label="SUGP1" cy:nodeId="67573">
    <graphics y="-11.710592140811514" x="169.90430443108505" z="0.0"/>
  </node>
  <node id="85910" label="HYLS1" cy:nodeId="66582">
    <graphics y="107.38900960479396" x="182.75730125725693" z="0.0"/>
  </node>
  <node id="84886" label="STRIP1" cy:nodeId="67606">
    <graphics y="363.70836843047755" x="400.3739394408507" z="0.0"/>
  </node>
  <node id="85878" label="SNX17" cy:nodeId="66614">
    <graphics y="56.74331677947657" x="-256.53075416266495" z="0.0"/>
  </node>
  <node id="84854" label="ZBTB8OS" cy:nodeId="67638">
    <graphics y="-79.52742563690526" x="9.894500659112396" z="0.0"/>
  </node>
  <node id="85846" label="SELPLG" cy:nodeId="66646">
    <graphics y="-36.146032204288076" x="64.05840294182724" z="0.0"/>
  </node>
  <node id="84822" label="MRPL40" cy:nodeId="67670">
    <graphics y="255.85419667754786" x="257.10071556389755" z="0.0"/>
  </node>
  <node id="85814" label="FGR" cy:nodeId="66678">
    <graphics y="151.88275350127833" x="405.76514427483505" z="0.0"/>
  </node>
  <node id="84790" label="FBXO45" cy:nodeId="67702">
    <graphics y="-90.01376902069433" x="422.3866957885069" z="0.0"/>
  </node>
  <node id="85782" label="BLOC1S4" cy:nodeId="66710">
    <graphics y="209.69335378204005" x="174.76413719475693" z="0.0"/>
  </node>
  <node id="84758" label="TTC1" cy:nodeId="67734">
    <graphics y="-235.9227961203037" x="633.6922072631163" z="0.0"/>
  </node>
  <node id="85750" label="XYLB" cy:nodeId="66742">
    <graphics y="114.35409749541896" x="191.03935997307724" z="0.0"/>
  </node>
  <node id="84726" label="ZXDC" cy:nodeId="67766">
    <graphics y="127.338789115292" x="-416.3519821900087" z="0.0"/>
  </node>
  <node id="85718" label="HN1" cy:nodeId="66774">
    <graphics y="108.78232778106349" x="106.14414207756943" z="0.0"/>
  </node>
  <node id="84694" label="NDUFV3" cy:nodeId="67798">
    <graphics y="415.7223759988369" x="118.01131431878036" z="0.0"/>
  </node>
  <node id="85686" label="NIF3L1" cy:nodeId="66806">
    <graphics y="-77.25157724823339" x="-198.3736649292665" z="0.0"/>
  </node>
  <node id="84662" label="RP11-664D7.4" cy:nodeId="67830">
    <graphics y="676.0464421609463" x="19.4881171447081" z="0.0"/>
  </node>
  <node id="85654" label="ADCK1" cy:nodeId="66838">
    <graphics y="267.6304265359463" x="43.29639427483505" z="0.0"/>
  </node>
  <node id="84630" label="CXCL17" cy:nodeId="67862">
    <graphics y="-350.96106516327245" x="-85.17584998786026" z="0.0"/>
  </node>
  <node id="85622" label="ALDH4A1" cy:nodeId="66870">
    <graphics y="215.49636281524317" x="-46.289758755560456" z="0.0"/>
  </node>
  <node id="84598" label="FAM175B" cy:nodeId="67894">
    <graphics y="-147.1312922140537" x="-204.5904618042665" z="0.0"/>
  </node>
  <node id="85590" label="C14orf1" cy:nodeId="66902">
    <graphics y="69.04827512298243" x="-372.37535865485245" z="0.0"/>
  </node>
  <node id="84566" label="SPATA18" cy:nodeId="67926">
    <graphics y="-741.7714289328037" x="-581.5582810181337" z="0.0"/>
  </node>
  <node id="85558" label="SNRNP25" cy:nodeId="66934">
    <graphics y="87.04390538726466" x="-152.2394333618837" z="0.0"/>
  </node>
  <node id="84534" label="ZDHHC13" cy:nodeId="67958">
    <graphics y="-670.0525568624912" x="-204.43805701911026" z="0.0"/>
  </node>
  <node id="85526" label="CDCA5" cy:nodeId="66966">
    <graphics y="185.34306539092677" x="22.42076866448349" z="0.0"/>
  </node>
  <node id="85494" label="DCPS" cy:nodeId="66998">
    <graphics y="61.44182981048243" x="-131.16918189703995" z="0.0"/>
  </node>
  <node id="85462" label="CECR5" cy:nodeId="67030">
    <graphics y="199.66048635039942" x="140.7127150756163" z="0.0"/>
  </node>
  <node id="85430" label="DECR2" cy:nodeId="67062">
    <graphics y="267.96268666778224" x="276.0896682006163" z="0.0"/>
  </node>
  <node id="85398" label="MED20" cy:nodeId="67094">
    <graphics y="362.4746342996182" x="113.80706016838974" z="0.0"/>
  </node>
  <node id="85366" label="LAMP3" cy:nodeId="67126">
    <graphics y="68.85374320541041" x="-160.64047248541885" z="0.0"/>
  </node>
  <node id="85334" label="CDC45" cy:nodeId="67158">
    <graphics y="-25.71368204559667" x="73.98628990471786" z="0.0"/>
  </node>
  <node id="85302" label="ASL" cy:nodeId="67190">
    <graphics y="8.418390403133799" x="-421.4507370728212" z="0.0"/>
  </node>
  <node id="85270" label="AHCY" cy:nodeId="67222">
    <graphics y="-83.35112558807714" x="-456.7173081177431" z="0.0"/>
  </node>
  <node id="85238" label="SQRDL" cy:nodeId="67254">
    <graphics y="-318.7891291281162" x="19.31747810662216" z="0.0"/>
  </node>
  <node id="85206" label="DUOXA1" cy:nodeId="67286">
    <graphics y="-113.46590219940526" x="-409.8002548950868" z="0.0"/>
  </node>
  <node id="85174" label="NDUFS7" cy:nodeId="67318">
    <graphics y="132.59311116729396" x="610.5887526732726" z="0.0"/>
  </node>
  <node id="85142" label="CDHR3" cy:nodeId="67350">
    <graphics y="-588.0862482687412" x="-382.2294235962587" z="0.0"/>
  </node>
  <node id="85110" label="PAX9" cy:nodeId="67382">
    <graphics y="-668.9879816671787" x="-590.74535377204" z="0.0"/>
  </node>
  <node id="85078" label="ST6GALNAC1" cy:nodeId="67414">
    <graphics y="-740.2708796163975" x="-453.70946510016495" z="0.0"/>
  </node>
  <node id="85046" label="ETS1" cy:nodeId="67446">
    <graphics y="-77.43053232635839" x="-556.083000256415" z="0.0"/>
  </node>
  <node id="86038" label="LRRK2" cy:nodeId="66454">
    <graphics y="17.14606679473536" x="-244.54727943121964" z="0.0"/>
  </node>
  <node id="85014" label="PARM1" cy:nodeId="67478">
    <graphics y="45.68393720183985" x="-43.942468716497956" z="0.0"/>
  </node>
  <node id="86006" label="NME6" cy:nodeId="66486">
    <graphics y="256.2891484597744" x="185.55930321038193" z="0.0"/>
  </node>
  <node id="84982" label="EIF3B" cy:nodeId="67510">
    <graphics y="18.354753623348643" x="-107.5963669556337" z="0.0"/>
  </node>
  <node id="85974" label="SCAMP4" cy:nodeId="66518">
    <graphics y="185.83617604766505" x="-109.60752113043839" z="0.0"/>
  </node>
  <node id="84950" label="GTF2H3" cy:nodeId="67542">
    <graphics y="324.8251592019619" x="236.0244826537413" z="0.0"/>
  </node>
  <node id="85942" label="CD33" cy:nodeId="66550">
    <graphics y="-1.0784052511630762" x="194.61746971428818" z="0.0"/>
  </node>
  <node id="84918" label="HSDL1" cy:nodeId="67574">
    <graphics y="98.60619939361231" x="-310.78624732672745" z="0.0"/>
  </node>
  <node id="85909" label="ULK3" cy:nodeId="66583">
    <graphics y="-162.37418161835058" x="-32.65730674445206" z="0.0"/>
  </node>
  <node id="84885" label="TLR4" cy:nodeId="67607">
    <graphics y="18.318044791561533" x="506.67224876702255" z="0.0"/>
  </node>
  <node id="85877" label="APOBR" cy:nodeId="66615">
    <graphics y="312.0599156716885" x="-88.08494575202042" z="0.0"/>
  </node>
  <node id="84853" label="ZBTB45" cy:nodeId="67639">
    <graphics y="-81.58409677948339" x="465.6807326537413" z="0.0"/>
  </node>
  <node id="85845" label="MMACHC" cy:nodeId="66647">
    <graphics y="148.50480092559474" x="191.94661705315536" z="0.0"/>
  </node>
  <node id="84821" label="TEFM" cy:nodeId="67671">
    <graphics y="292.3889714578213" x="616.552253649835" z="0.0"/>
  </node>
  <node id="85813" label="SYK" cy:nodeId="66679">
    <graphics y="237.81374562774317" x="132.21030418694443" z="0.0"/>
  </node>
  <node id="84789" label="C10orf35" cy:nodeId="67703">
    <graphics y="-175.9861506124912" x="356.0612258178038" z="0.0"/>
  </node>
  <node id="85781" label="PREB" cy:nodeId="66711">
    <graphics y="52.84695828948634" x="275.99427025139755" z="0.0"/>
  </node>
  <node id="84757" label="VTA1" cy:nodeId="67735">
    <graphics y="479.9539433816494" x="37.7837599974913" z="0.0"/>
  </node>
  <node id="85749" label="DERL2" cy:nodeId="66743">
    <graphics y="-252.2612970968662" x="14.41314689934677" z="0.0"/>
  </node>
  <node id="84725" label="RTCA" cy:nodeId="67767">
    <graphics y="-158.25273691620214" x="207.05605308831161" z="0.0"/>
  </node>
  <node id="85717" label="GTF3C6" cy:nodeId="66775">
    <graphics y="154.9025212625088" x="-13.214565350409089" z="0.0"/>
  </node>
  <node id="84693" label="COG8" cy:nodeId="67799">
    <graphics y="-343.7533625265537" x="406.2845839721007" z="0.0"/>
  </node>
  <node id="85685" label="PYCRL" cy:nodeId="66807">
    <graphics y="236.30172170196192" x="47.62644951165146" z="0.0"/>
  </node>
  <node id="84661" label="ARHGEF15" cy:nodeId="67831">
    <graphics y="484.9384099343838" x="373.4444350463194" z="0.0"/>
  </node>
  <node id="85653" label="RPS6KA4" cy:nodeId="66839">
    <graphics y="217.2815495828213" x="143.40023033440536" z="0.0"/>
  </node>
  <node id="84629" label="LDHD" cy:nodeId="67863">
    <graphics y="55.908670554500986" x="-330.6039353150087" z="0.0"/>
  </node>
  <node id="85621" label="EDEM2" cy:nodeId="66871">
    <graphics y="310.23461354766505" x="-101.52214057623917" z="0.0"/>
  </node>
  <node id="84597" label="TOMM22" cy:nodeId="67895">
    <graphics y="462.4458867410244" x="-45.38679034888321" z="0.0"/>
  </node>
  <node id="85589" label="AACS" cy:nodeId="66903">
    <graphics y="-146.5491846701084" x="-182.24814613043839" z="0.0"/>
  </node>
  <node id="84565" label="EFCAB12" cy:nodeId="67927">
    <graphics y="-602.97168528046" x="-561.75463111579" z="0.0"/>
  </node>
  <node id="85557" label="EBP" cy:nodeId="66935">
    <graphics y="-226.19486032928808" x="-3.909599377508698" z="0.0"/>
  </node>
  <node id="84533" label="IQUB" cy:nodeId="67959">
    <graphics y="-653.5958307882725" x="-551.605461193915" z="0.0"/>
  </node>
  <node id="85525" label="SLC22A3" cy:nodeId="66967">
    <graphics y="-171.2258967062412" x="-272.27057655036026" z="0.0"/>
  </node>
  <node id="85493" label="TMEM184A" cy:nodeId="66999">
    <graphics y="-207.37863718475683" x="-76.32663352667862" z="0.0"/>
  </node>
  <node id="85461" label="MFSD9" cy:nodeId="67031">
    <graphics y="-2.120275368350576" x="-111.88076026618057" z="0.0"/>
  </node>
  <node id="85429" label="LSM5" cy:nodeId="67063">
    <graphics y="-66.52268015350683" x="-158.59513862311417" z="0.0"/>
  </node>
  <node id="85397" label="MRPS15" cy:nodeId="67095">
    <graphics y="-163.4083460470615" x="110.81482689202255" z="0.0"/>
  </node>
  <node id="85365" label="RPS6KA2" cy:nodeId="67127">
    <graphics y="211.5110417703213" x="-186.28025062262589" z="0.0"/>
  </node>
  <node id="85333" label="RRM2" cy:nodeId="67159">
    <graphics y="208.84853566680567" x="214.78618614495224" z="0.0"/>
  </node>
  <node id="85301" label="LSR" cy:nodeId="67191">
    <graphics y="-24.539518227237295" x="-179.00914771735245" z="0.0"/>
  </node>
  <node id="85269" label="LTA4H" cy:nodeId="67223">
    <graphics y="-188.58469187225683" x="63.13633720696396" z="0.0"/>
  </node>
  <node id="85237" label="FDFT1" cy:nodeId="67255">
    <graphics y="135.3706837991299" x="-229.80826575934464" z="0.0"/>
  </node>
  <node id="85205" label="SLC35B2" cy:nodeId="67287">
    <graphics y="360.0575505593838" x="43.238792346124114" z="0.0"/>
  </node>
  <node id="85173" label="RECQL4" cy:nodeId="67319">
    <graphics y="262.3617192605557" x="-44.886295391912995" z="0.0"/>
  </node>
  <node id="85141" label="MAK" cy:nodeId="67351">
    <graphics y="-731.0470026632725" x="-395.7023239868837" z="0.0"/>
  </node>
  <node id="85109" label="IRF6" cy:nodeId="67383">
    <graphics y="-874.350835671085" x="-483.34923560797745" z="0.0"/>
  </node>
  <node id="85077" label="TTC30B" cy:nodeId="67415">
    <graphics y="-468.28320871795995" x="-651.03441627204" z="0.0"/>
  </node>
  <node id="85045" label="NR3C2" cy:nodeId="67447">
    <graphics y="-176.88718210663183" x="-543.0316391724306" z="0.0"/>
  </node>
  <node id="86037" label="GINS2" cy:nodeId="66455">
    <graphics y="168.7173405984463" x="33.680389330987396" z="0.0"/>
  </node>
  <node id="85013" label="PRSS16" cy:nodeId="67479">
    <graphics y="261.35424245391505" x="-153.56101997077042" z="0.0"/>
  </node>
  <node id="86005" label="SLC38A7" cy:nodeId="66487">
    <graphics y="71.556224952084" x="160.42482750237411" z="0.0"/>
  </node>
  <node id="84981" label="SIGLEC10" cy:nodeId="67511">
    <graphics y="60.06363500152247" x="-155.76491553961807" z="0.0"/>
  </node>
  <node id="85973" label="APEX1" cy:nodeId="66519">
    <graphics y="321.4441167214932" x="199.78591148674911" z="0.0"/>
  </node>
  <node id="84949" label="LSM14B" cy:nodeId="67543">
    <graphics y="349.98815358672755" x="14.865302966241302" z="0.0"/>
  </node>
  <node id="85941" label="AKR1A1" cy:nodeId="66551">
    <graphics y="-95.8967951437412" x="-132.2920456665712" z="0.0"/>
  </node>
  <node id="84917" label="CHAMP1" cy:nodeId="67575">
    <graphics y="-142.348653664249" x="76.43058769524521" z="0.0"/>
  </node>
  <node id="85908" label="DIEXF" cy:nodeId="66584">
    <graphics y="35.773157248836924" x="-68.51672370612198" z="0.0"/>
  </node>
  <node id="84884" label="PSMD4" cy:nodeId="67608">
    <graphics y="-354.0512446066318" x="348.2633437377257" z="0.0"/>
  </node>
  <node id="85876" label="RGS19" cy:nodeId="66616">
    <graphics y="288.3656865457119" x="-25.215785099859772" z="0.0"/>
  </node>
  <node id="84852" label="DNTTIP1" cy:nodeId="67640">
    <graphics y="-188.0924738546787" x="135.06845848381943" z="0.0"/>
  </node>
  <node id="85844" label="FCGR1B" cy:nodeId="66648">
    <graphics y="230.56403554473536" x="-129.28688819586807" z="0.0"/>
  </node>
  <node id="84820" label="SRCRB4D" cy:nodeId="67672">
    <graphics y="273.0834294656338" x="275.2437514525694" z="0.0"/>
  </node>
  <node id="85812" label="CYB5RL" cy:nodeId="66680">
    <graphics y="330.9900456765713" x="171.19268028557724" z="0.0"/>
  </node>
  <node id="84788" label="ZNF2" cy:nodeId="67704">
    <graphics y="179.3695165017666" x="-339.2199326294618" z="0.0"/>
  </node>
  <node id="85780" label="RAN" cy:nodeId="66712">
    <graphics y="72.20543445144312" x="132.85254661858505" z="0.0"/>
  </node>
  <node id="84756" label="LRRC61" cy:nodeId="67736">
    <graphics y="171.0949803689541" x="-200.6974411743837" z="0.0"/>
  </node>
  <node id="85748" label="C9orf69" cy:nodeId="66744">
    <graphics y="170.0636540750088" x="-168.59470374762589" z="0.0"/>
  </node>
  <node id="84724" label="UBE2D4" cy:nodeId="67768">
    <graphics y="87.6890031198086" x="229.1901320678038" z="0.0"/>
  </node>
  <node id="85716" label="ZDHHC12" cy:nodeId="66776">
    <graphics y="138.81582082305567" x="144.5592726928038" z="0.0"/>
  </node>
  <node id="84692" label="BLVRB" cy:nodeId="67800">
    <graphics y="172.0918523171963" x="-0.8709488648133856" z="0.0"/>
  </node>
  <node id="85684" label="PDF" cy:nodeId="66808">
    <graphics y="-201.67862497772558" x="153.04323570549911" z="0.0"/>
  </node>
  <node id="84660" label="TRMT5" cy:nodeId="67832">
    <graphics y="-81.75061594452245" x="457.5077285033507" z="0.0"/>
  </node>
  <node id="85652" label="POLR1B" cy:nodeId="66840">
    <graphics y="353.35643971954005" x="158.6074904662413" z="0.0"/>
  </node>
  <node id="84628" label="ZC2HC1C" cy:nodeId="67864">
    <graphics y="-67.56902109588964" x="-543.7777634400087" z="0.0"/>
  </node>
  <node id="85620" label="DHRS4L2" cy:nodeId="66872">
    <graphics y="516.7947331765713" x="116.66455833733505" z="0.0"/>
  </node>
  <node id="84596" label="ATP6V0D1" cy:nodeId="67896">
    <graphics y="169.50239003692286" x="135.40767662346786" z="0.0"/>
  </node>
  <node id="85588" label="SIRT7" cy:nodeId="66904">
    <graphics y="438.5157719949307" x="-75.67336661994034" z="0.0"/>
  </node>
  <node id="84564" label="C9orf24" cy:nodeId="67928">
    <graphics y="-579.19385324921" x="-491.6211472290712" z="0.0"/>
  </node>
  <node id="85556" label="FAM118B" cy:nodeId="66936">
    <graphics y="358.30956471954005" x="-13.76770789801651" z="0.0"/>
  </node>
  <node id="84532" label="C16orf71" cy:nodeId="67960">
    <graphics y="-463.90332590545995" x="-641.6371384400087" z="0.0"/>
  </node>
  <node id="85524" label="TROAP" cy:nodeId="66968">
    <graphics y="-224.0868586203037" x="389.81983177483505" z="0.0"/>
  </node>
  <node id="85492" label="RABIF" cy:nodeId="67000">
    <graphics y="28.114698539120127" x="219.87856285393661" z="0.0"/>
  </node>
  <node id="85460" label="FASTK" cy:nodeId="67032">
    <graphics y="302.6527654031338" x="155.56069176018661" z="0.0"/>
  </node>
  <node id="85428" label="RP11-345J4.5" cy:nodeId="67064">
    <graphics y="37.785120139461924" x="361.3801039916319" z="0.0"/>
  </node>
  <node id="85396" label="TOPORS" cy:nodeId="67096">
    <graphics y="101.12140668426173" x="82.22965233147568" z="0.0"/>
  </node>
  <node id="85364" label="ABCC6" cy:nodeId="67128">
    <graphics y="-155.15268503631933" x="-130.23239906012589" z="0.0"/>
  </node>
  <node id="85332" label="ELOF1" cy:nodeId="67160">
    <graphics y="37.1923161843838" x="628.296882556085" z="0.0"/>
  </node>
  <node id="85300" label="CCDC94" cy:nodeId="67192">
    <graphics y="108.87945760284083" x="-322.96471412360245" z="0.0"/>
  </node>
  <node id="85268" label="SMARCC2" cy:nodeId="67224">
    <graphics y="89.39040196929591" x="57.798004077081146" z="0.0"/>
  </node>
  <node id="85236" label="C6orf211" cy:nodeId="67256">
    <graphics y="-71.45114695038183" x="-49.59408195197159" z="0.0"/>
  </node>
  <node id="85204" label="MCTS1" cy:nodeId="67288">
    <graphics y="-111.59253488983495" x="307.5356215697569" z="0.0"/>
  </node>
  <node id="85172" label="MFSD3" cy:nodeId="67320">
    <graphics y="595.2385808328213" x="91.70854179680771" z="0.0"/>
  </node>
  <node id="85140" label="CETN2" cy:nodeId="67352">
    <graphics y="-606.93213449921" x="-442.0087509888368" z="0.0"/>
  </node>
  <node id="85108" label="TSNAXIP1" cy:nodeId="67384">
    <graphics y="-384.89893137420995" x="-557.6440964478212" z="0.0"/>
  </node>
  <node id="85076" label="RFX4" cy:nodeId="67416">
    <graphics y="-530.8568171163975" x="-470.31481177985245" z="0.0"/>
  </node>
  <node id="85044" label="MEF2D" cy:nodeId="67448">
    <graphics y="459.4220525125088" x="228.2200392943663" z="0.0"/>
  </node>
  <node id="86036" label="TFB2M" cy:nodeId="66456">
    <graphics y="-6.707845558780264" x="-0.38203056037002625" z="0.0"/>
  </node>
  <node id="85012" label="AKAP1" cy:nodeId="67480">
    <graphics y="-221.75497995819433" x="8.548564837579192" z="0.0"/>
  </node>
  <node id="86004" label="RNASE6" cy:nodeId="66488">
    <graphics y="123.34920705352442" x="-111.52576453864151" z="0.0"/>
  </node>
  <node id="84980" label="HN1L" cy:nodeId="67512">
    <graphics y="-279.39099680389745" x="-274.59748084723526" z="0.0"/>
  </node>
  <node id="85972" label="GPR34" cy:nodeId="66520">
    <graphics y="229.70351613555567" x="-68.54084785162979" z="0.0"/>
  </node>
  <node id="84948" label="SAYSD1" cy:nodeId="67544">
    <graphics y="-22.8120783468662" x="10.127658770684661" z="0.0"/>
  </node>
  <node id="85940" label="CD300LF" cy:nodeId="66552">
    <graphics y="187.7196370462002" x="224.33573143303818" z="0.0"/>
  </node>
  <node id="84916" label="HADH" cy:nodeId="67576">
    <graphics y="-31.397245278018545" x="-43.65981586157852" z="0.0"/>
  </node>
  <node id="85907" label="DNPH1" cy:nodeId="66585">
    <graphics y="20.79926503692286" x="241.75037376702255" z="0.0"/>
  </node>
  <node id="84883" label="WDR6" cy:nodeId="67609">
    <graphics y="424.4906560281338" x="137.33473961174911" z="0.0"/>
  </node>
  <node id="85875" label="UMPS" cy:nodeId="66617">
    <graphics y="205.13369191680567" x="-23.457325054998933" z="0.0"/>
  </node>
  <node id="84851" label="NDUFB3" cy:nodeId="67641">
    <graphics y="13.296007285458018" x="-73.53621680914932" z="0.0"/>
  </node>
  <node id="85843" label="ITGB2" cy:nodeId="66649">
    <graphics y="54.1869508126797" x="137.155509875421" z="0.0"/>
  </node>
  <node id="84819" label="GPN1" cy:nodeId="67673">
    <graphics y="184.19320882354396" x="283.2032851439757" z="0.0"/>
  </node>
  <node id="85811" label="MS4A7" cy:nodeId="66681">
    <graphics y="268.5681249002041" x="-70.16748817145401" z="0.0"/>
  </node>
  <node id="84787" label="TMEM245" cy:nodeId="67705">
    <graphics y="249.85343373809474" x="-453.9130173462587" z="0.0"/>
  </node>
  <node id="85779" label="TREM2" cy:nodeId="66713">
    <graphics y="358.9392949441494" x="125.54080955803818" z="0.0"/>
  </node>
  <node id="84755" label="DNASE1" cy:nodeId="67737">
    <graphics y="415.0808354714932" x="206.15244285881943" z="0.0"/>
  </node>
  <node id="85747" label="GRB2" cy:nodeId="66745">
    <graphics y="20.209924826961924" x="-184.21103675543839" z="0.0"/>
  </node>
  <node id="84723" label="ELAC1" cy:nodeId="67769">
    <graphics y="287.8886052468838" x="402.3562392455382" z="0.0"/>
  </node>
  <node id="85715" label="RAB42" cy:nodeId="66777">
    <graphics y="132.7991620400967" x="195.3709639769835" z="0.0"/>
  </node>
  <node id="84691" label="PMVK" cy:nodeId="67801">
    <graphics y="103.7663899758877" x="-280.57294471442276" z="0.0"/>
  </node>
  <node id="85683" label="NCLN" cy:nodeId="66809">
    <graphics y="119.26676000152247" x="-108.11139686286026" z="0.0"/>
  </node>
  <node id="84659" label="ATP11A" cy:nodeId="67833">
    <graphics y="285.39313710723536" x="-326.4729538696962" z="0.0"/>
  </node>
  <node id="85651" label="GPAA1" cy:nodeId="66841">
    <graphics y="185.7231541970791" x="53.28088371575302" z="0.0"/>
  </node>
  <node id="84627" label="TMEM97" cy:nodeId="67865">
    <graphics y="-68.40781198944433" x="-476.6948471802431" z="0.0"/>
  </node>
  <node id="85619" label="CTNS" cy:nodeId="66873">
    <graphics y="-0.7702006002841699" x="206.42559044182724" z="0.0"/>
  </node>
  <node id="84595" label="CCS" cy:nodeId="67897">
    <graphics y="318.88854421172755" x="556.7437819701476" z="0.0"/>
  </node>
  <node id="85587" label="SLC27A4" cy:nodeId="66905">
    <graphics y="50.95449079070704" x="205.18308250725693" z="0.0"/>
  </node>
  <node id="84563" label="C8orf47" cy:nodeId="67929">
    <graphics y="-760.702886452335" x="-657.1092453736024" z="0.0"/>
  </node>
  <node id="85555" label="MTCH2" cy:nodeId="66937">
    <graphics y="62.605447898250986" x="-74.3273125427919" z="0.0"/>
  </node>
  <node id="84531" label="DTHD1" cy:nodeId="67961">
    <graphics y="-784.10986887421" x="-538.0586167114931" z="0.0"/>
  </node>
  <node id="85523" label="AURKA" cy:nodeId="66969">
    <graphics y="65.41788686309474" x="100.81381981194443" z="0.0"/>
  </node>
  <node id="85491" label="NLN" cy:nodeId="67001">
    <graphics y="100.20066846404688" x="43.37770073235458" z="0.0"/>
  </node>
  <node id="85459" label="SNAP47" cy:nodeId="67033">
    <graphics y="-86.3399103781162" x="121.89502708733505" z="0.0"/>
  </node>
  <node id="85427" label="CCR2" cy:nodeId="67065">
    <graphics y="209.08309377227442" x="363.3841933471007" z="0.0"/>
  </node>
  <node id="85395" label="TXNDC17" cy:nodeId="67097">
    <graphics y="199.19372762237208" x="106.84265892327255" z="0.0"/>
  </node>
  <node id="85363" label="RAB40C" cy:nodeId="67129">
    <graphics y="-305.2280634542881" x="-222.61754615485245" z="0.0"/>
  </node>
  <node id="85331" label="GYPE" cy:nodeId="67161">
    <graphics y="651.2590886453213" x="-52.3804245728212" z="0.0"/>
  </node>
  <node id="85299" label="USP44" cy:nodeId="67193">
    <graphics y="-203.16538034881933" x="-203.981453015204" z="0.0"/>
  </node>
  <node id="85267" label="SASH3" cy:nodeId="67225">
    <graphics y="369.1729070046963" x="327.2859877806944" z="0.0"/>
  </node>
  <node id="85235" label="ELOVL1" cy:nodeId="67257">
    <graphics y="135.6580907205166" x="439.4571303588194" z="0.0"/>
  </node>
  <node id="85203" label="RFT1" cy:nodeId="67289">
    <graphics y="-0.23967539276463867" x="169.38826744378036" z="0.0"/>
  </node>
  <node id="85171" label="ATAD3A" cy:nodeId="67321">
    <graphics y="375.4899541238369" x="-216.6566696900087" z="0.0"/>
  </node>
  <node id="85139" label="C22orf15" cy:nodeId="67353">
    <graphics y="-650.0272272726475" x="-711.6527634400087" z="0.0"/>
  </node>
  <node id="85107" label="DENND6B" cy:nodeId="67385">
    <graphics y="-674.0055597921787" x="-409.4878769653993" z="0.0"/>
  </node>
  <node id="85075" label="MIPEP" cy:nodeId="67417">
    <graphics y="-348.47376047577245" x="-260.72431190192276" z="0.0"/>
  </node>
  <node id="85043" label="GCM1" cy:nodeId="67449">
    <graphics y="-60.71680246795995" x="-382.61107642828995" z="0.0"/>
  </node>
  <node id="86035" label="LYRM2" cy:nodeId="66457">
    <graphics y="-17.25244699920995" x="-93.56636817633682" z="0.0"/>
  </node>
  <node id="85011" label="C1orf116" cy:nodeId="67481">
    <graphics y="-25.4596613546787" x="-9.953836514349518" z="0.0"/>
  </node>
  <node id="86003" label="FPR3" cy:nodeId="66489">
    <graphics y="157.30624593291896" x="297.64978782952255" z="0.0"/>
  </node>
  <node id="84979" label="FBXO27" cy:nodeId="67513">
    <graphics y="242.38329518829005" x="-66.7800827759462" z="0.0"/>
  </node>
  <node id="85971" label="MRM1" cy:nodeId="66521">
    <graphics y="235.2628728250088" x="43.88089744866318" z="0.0"/>
  </node>
  <node id="84947" label="TMEM39B" cy:nodeId="67545">
    <graphics y="211.45760549102442" x="468.75208275139755" z="0.0"/>
  </node>
  <node id="85939" label="PCNA" cy:nodeId="66553">
    <graphics y="84.66821111236231" x="21.728137896661224" z="0.0"/>
  </node>
  <node id="84915" label="PRKAG1" cy:nodeId="67577">
    <graphics y="96.79359639678614" x="250.5120314818663" z="0.0"/>
  </node>
  <node id="85906" label="SLC35C1" cy:nodeId="66586">
    <graphics y="250.65152944121974" x="117.30420677483505" z="0.0"/>
  </node>
  <node id="84882" label="AL591479.1" cy:nodeId="67610">
    <graphics y="221.2863866189541" x="229.15274803460068" z="0.0"/>
  </node>
  <node id="85874" label="IRAK1" cy:nodeId="66618">
    <graphics y="44.7655640939297" x="244.62390892327255" z="0.0"/>
  </node>
  <node id="84850" label="PATZ1" cy:nodeId="67642">
    <graphics y="445.1986333230557" x="11.509212420587005" z="0.0"/>
  </node>
  <node id="85842" label="SEC23B" cy:nodeId="66650">
    <graphics y="246.36129201446192" x="130.605949328546" z="0.0"/>
  </node>
  <node id="84818" label="ZNF646" cy:nodeId="67674">
    <graphics y="245.26967824493067" x="446.1177748900694" z="0.0"/>
  </node>
  <node id="85810" label="PARS2" cy:nodeId="66682">
    <graphics y="113.29916585479396" x="78.41551964104599" z="0.0"/>
  </node>
  <node id="84786" label="C9orf64" cy:nodeId="67706">
    <graphics y="159.86230672393458" x="-132.70967872321182" z="0.0"/>
  </node>
  <node id="85778" label="ABRACL" cy:nodeId="66714">
    <graphics y="290.44770253692286" x="55.715415881280364" z="0.0"/>
  </node>
  <node id="84754" label="DNASE1L1" cy:nodeId="67738">
    <graphics y="273.2248631814541" x="-350.14012916266495" z="0.0"/>
  </node>
  <node id="85746" label="L2HGDH" cy:nodeId="66746">
    <graphics y="194.20035756621974" x="-63.50673301398331" z="0.0"/>
  </node>
  <node id="84722" label="ASPSCR1" cy:nodeId="67770">
    <graphics y="-89.03745066131933" x="118.13736717522568" z="0.0"/>
  </node>
  <node id="85714" label="SCAMP3" cy:nodeId="66778">
    <graphics y="256.88036550079005" x="100.21360008538193" z="0.0"/>
  </node>
  <node id="84690" label="CSTF1" cy:nodeId="67802">
    <graphics y="57.65684712920802" x="-359.1286850708681" z="0.0"/>
  </node>
  <node id="85682" label="MRPS35" cy:nodeId="66810">
    <graphics y="242.44327748809474" x="73.74727623284286" z="0.0"/>
  </node>
  <node id="84658" label="IARS2" cy:nodeId="67834">
    <graphics y="62.55319798980372" x="-276.3463364380556" z="0.0"/>
  </node>
  <node id="85650" label="TARS2" cy:nodeId="66842">
    <graphics y="13.840952048641611" x="-334.4724961060243" z="0.0"/>
  </node>
  <node id="84626" label="ZDHHC3" cy:nodeId="67866">
    <graphics y="-404.3152826925693" x="-64.55130202948624" z="0.0"/>
  </node>
  <node id="85618" label="IPO13" cy:nodeId="66874">
    <graphics y="57.3126603463711" x="288.0516127806944" z="0.0"/>
  </node>
  <node id="84594" label="PHPT1" cy:nodeId="67898">
    <graphics y="-192.72571360077245" x="299.9375685912413" z="0.0"/>
  </node>
  <node id="85586" label="TTPAL" cy:nodeId="66906">
    <graphics y="-81.2163752218662" x="-202.22866065680557" z="0.0"/>
  </node>
  <node id="84562" label="KIF24" cy:nodeId="67930">
    <graphics y="-526.1399592062412" x="-378.5048447388368" z="0.0"/>
  </node>
  <node id="85554" label="GCDH" cy:nodeId="66938">
    <graphics y="307.95463002715724" x="114.26966087639755" z="0.0"/>
  </node>
  <node id="84530" label="KIF9" cy:nodeId="67962">
    <graphics y="-386.3599604269443" x="-376.4159470337587" z="0.0"/>
  </node>
  <node id="85522" label="FOXM1" cy:nodeId="66970">
    <graphics y="112.4129086831631" x="135.934806750421" z="0.0"/>
  </node>
  <node id="85490" label="YIF1B" cy:nodeId="67002">
    <graphics y="343.7573796609463" x="386.2432021361632" z="0.0"/>
  </node>
  <node id="85458" label="POLR2D" cy:nodeId="67034">
    <graphics y="-185.28098093475683" x="202.66123192131943" z="0.0"/>
  </node>
  <node id="85426" label="C5orf63" cy:nodeId="67066">
    <graphics y="-227.04813181366308" x="230.7368849974913" z="0.0"/>
  </node>
  <node id="85394" label="FEN1" cy:nodeId="67098">
    <graphics y="-50.647374977725576" x="56.9831008178038" z="0.0"/>
  </node>
  <node id="85362" label="TLCD1" cy:nodeId="67130">
    <graphics y="63.0974036553921" x="-124.34230048834854" z="0.0"/>
  </node>
  <node id="85330" label="NCF2" cy:nodeId="67162">
    <graphics y="497.91942800079005" x="99.29167930901474" z="0.0"/>
  </node>
  <node id="85298" label="DCAF11" cy:nodeId="67194">
    <graphics y="196.71512807403224" x="-447.14281470953995" z="0.0"/>
  </node>
  <node id="85266" label="RRP36" cy:nodeId="67226">
    <graphics y="59.62718022857325" x="-141.9603348511415" z="0.0"/>
  </node>
  <node id="85234" label="ARNTL" cy:nodeId="67258">
    <graphics y="-1.818631996768545" x="-59.93288047492081" z="0.0"/>
  </node>
  <node id="85202" label="RP4-758J18.2" cy:nodeId="67290">
    <graphics y="362.81359303985255" x="212.86516563713974" z="0.0"/>
  </node>
  <node id="85170" label="FBXL6" cy:nodeId="67322">
    <graphics y="393.2264043191494" x="442.20069114983505" z="0.0"/>
  </node>
  <node id="85138" label="CCDC180" cy:nodeId="67354">
    <graphics y="-737.0052546163975" x="-536.4263535278993" z="0.0"/>
  </node>
  <node id="85106" label="DNAAF1" cy:nodeId="67386">
    <graphics y="-856.82275949921" x="-676.66820533454" z="0.0"/>
  </node>
  <node id="85074" label="ELK3" cy:nodeId="67418">
    <graphics y="242.72164357696192" x="-317.2521591919618" z="0.0"/>
  </node>
  <node id="85042" label="RFX1" cy:nodeId="67450">
    <graphics y="-762.9495905538975" x="-611.8104172486024" z="0.0"/>
  </node>
  <node id="86034" label="MON1A" cy:nodeId="66458">
    <graphics y="249.54381764922755" x="146.48189537346786" z="0.0"/>
  </node>
  <node id="85010" label="CDKL2" cy:nodeId="67482">
    <graphics y="-52.75842081512792" x="-20.511762692328034" z="0.0"/>
  </node>
  <node id="86002" label="DRAM1" cy:nodeId="66490">
    <graphics y="36.78509725127833" x="-75.67728431403214" z="0.0"/>
  </node>
  <node id="84978" label="EXOSC2" cy:nodeId="67514">
    <graphics y="-196.94077097381933" x="248.13004295647568" z="0.0"/>
  </node>
  <node id="85970" label="HYOU1" cy:nodeId="66522">
    <graphics y="161.5918065408291" x="-77.97254951178604" z="0.0"/>
  </node>
  <node id="84946" label="ATP6V1D" cy:nodeId="67546">
    <graphics y="-255.89896189178808" x="75.05790703118271" z="0.0"/>
  </node>
  <node id="85938" label="FLRT3" cy:nodeId="66554">
    <graphics y="-200.45310007538183" x="20.73766319573349" z="0.0"/>
  </node>
  <node id="84914" label="MRPS9" cy:nodeId="67578">
    <graphics y="-148.89446054901464" x="98.18189232171005" z="0.0"/>
  </node>
  <node id="85905" label="BRI3" cy:nodeId="66587">
    <graphics y="129.07992757354396" x="273.34473411858505" z="0.0"/>
  </node>
  <node id="84881" label="SNTB1" cy:nodeId="67611">
    <graphics y="366.9610234597744" x="264.8308486205382" z="0.0"/>
  </node>
  <node id="85873" label="DCTPP1" cy:nodeId="66619">
    <graphics y="-44.57824503387792" x="-22.819748951788483" z="0.0"/>
  </node>
  <node id="84849" label="ZNF622" cy:nodeId="67643">
    <graphics y="109.10196889434474" x="493.8644484740538" z="0.0"/>
  </node>
  <node id="85841" label="ADSL" cy:nodeId="66651">
    <graphics y="-2.631681313174795" x="302.1342543822569" z="0.0"/>
  </node>
  <node id="84817" label="PPP1R8" cy:nodeId="67675">
    <graphics y="359.8251592019619" x="123.65218345940536" z="0.0"/>
  </node>
  <node id="85809" label="SLC7A7" cy:nodeId="66683">
    <graphics y="80.34189284835475" x="-68.81594093024307" z="0.0"/>
  </node>
  <node id="84785" label="ORC5" cy:nodeId="67707">
    <graphics y="-277.4900873800693" x="169.86667625725693" z="0.0"/>
  </node>
  <node id="85777" label="PDCD2L" cy:nodeId="66715">
    <graphics y="341.8613530496182" x="-28.35499866187149" z="0.0"/>
  </node>
  <node id="84753" label="MCAT" cy:nodeId="67739">
    <graphics y="-154.97635446991308" x="-330.4567490357118" z="0.0"/>
  </node>
  <node id="85745" label="MTG1" cy:nodeId="66747">
    <graphics y="-238.69238840545995" x="-61.34856612860733" z="0.0"/>
  </node>
  <node id="84721" label="SMIM1" cy:nodeId="67771">
    <graphics y="-138.0432795187412" x="206.609855578546" z="0.0"/>
  </node>
  <node id="85713" label="PSMD8" cy:nodeId="66779">
    <graphics y="316.99157155547755" x="348.90943138421005" z="0.0"/>
  </node>
  <node id="84689" label="PDZD11" cy:nodeId="67803">
    <graphics y="-306.35217844452245" x="131.32094566643661" z="0.0"/>
  </node>
  <node id="85681" label="CDC123" cy:nodeId="66811">
    <graphics y="311.99804128204005" x="-27.22346551596695" z="0.0"/>
  </node>
  <node id="84657" label="ARAP1" cy:nodeId="67835">
    <graphics y="-371.9856928488193" x="-94.0747376221376" z="0.0"/>
  </node>
  <node id="85649" label="COQ2" cy:nodeId="66843">
    <graphics y="-35.27738748993261" x="0.22607414544052062" z="0.0"/>
  </node>
  <node id="84625" label="SLC7A8" cy:nodeId="67867">
    <graphics y="2.8523351052822363" x="-522.518547131415" z="0.0"/>
  </node>
  <node id="85617" label="TXN2" cy:nodeId="66875">
    <graphics y="534.0414372781338" x="328.6326064330382" z="0.0"/>
  </node>
  <node id="84593" label="LRRC14" cy:nodeId="67899">
    <graphics y="635.8838445046963" x="321.9467238646788" z="0.0"/>
  </node>
  <node id="85585" label="SLC1A4" cy:nodeId="66907">
    <graphics y="45.197183738094736" x="-0.6121369141297919" z="0.0"/>
  </node>
  <node id="84561" label="MOK" cy:nodeId="67931">
    <graphics y="-656.0100763937412" x="-721.09252174079" z="0.0"/>
  </node>
  <node id="85553" label="ACAA2" cy:nodeId="66939">
    <graphics y="-43.20030771698339" x="-120.47458656012589" z="0.0"/>
  </node>
  <node id="84529" label="ACSBG1" cy:nodeId="67963">
    <graphics y="-469.75574289764745" x="-546.4990769165712" z="0.0"/>
  </node>
  <node id="85521" label="CISD3" cy:nodeId="66971">
    <graphics y="439.8445073464932" x="-23.152546002264558" z="0.0"/>
  </node>
  <node id="85489" label="MRPL24" cy:nodeId="67003">
    <graphics y="169.82477773223536" x="342.0512465697569" z="0.0"/>
  </node>
  <node id="85457" label="DHRS7B" cy:nodeId="67035">
    <graphics y="226.64789784942286" x="-97.25659949957901" z="0.0"/>
  </node>
  <node id="85425" label="ACOT13" cy:nodeId="67067">
    <graphics y="515.0520268777432" x="174.30567161858505" z="0.0"/>
  </node>
  <node id="85393" label="SCIMP" cy:nodeId="67099">
    <graphics y="297.23143971954005" x="-9.268978192205964" z="0.0"/>
  </node>
  <node id="85361" label="PNKD" cy:nodeId="67131">
    <graphics y="344.5302373269619" x="-131.34061439215714" z="0.0"/>
  </node>
  <node id="85329" label="FAM105A" cy:nodeId="67163">
    <graphics y="-21.82190500702245" x="-181.5884323853212" z="0.0"/>
  </node>
  <node id="85297" label="BCAT2" cy:nodeId="67195">
    <graphics y="-184.3567560812412" x="-210.84590919196182" z="0.0"/>
  </node>
  <node id="85265" label="SPDL1" cy:nodeId="67227">
    <graphics y="93.58720601592677" x="339.5204238158507" z="0.0"/>
  </node>
  <node id="85233" label="SSR3" cy:nodeId="67259">
    <graphics y="-329.37366281952245" x="52.60181419671005" z="0.0"/>
  </node>
  <node id="85201" label="POP4" cy:nodeId="67291">
    <graphics y="238.92540944610255" x="357.5325392943663" z="0.0"/>
  </node>
  <node id="85169" label="SRM" cy:nodeId="67323">
    <graphics y="610.322015891415" x="188.81137840569443" z="0.0"/>
  </node>
  <node id="85137" label="KLHL32" cy:nodeId="67355">
    <graphics y="-587.0321711203037" x="-714.6404953736024" z="0.0"/>
  </node>
  <node id="85105" label="C17orf72" cy:nodeId="67387">
    <graphics y="-589.601812233585" x="-623.9442063111024" z="0.0"/>
  </node>
  <node id="85073" label="HSF1" cy:nodeId="67419">
    <graphics y="-245.8113459249912" x="156.85056297600693" z="0.0"/>
  </node>
  <node id="85041" label="MGA" cy:nodeId="67451">
    <graphics y="-133.22861277069433" x="-642.35521705329" z="0.0"/>
  </node>
  <node id="86033" label="SYT15" cy:nodeId="66459">
    <graphics y="77.85274709258692" x="8.036109851006927" z="0.0"/>
  </node>
  <node id="85009" label="PABPC1L" cy:nodeId="67483">
    <graphics y="40.17088521514552" x="-107.87589271246964" z="0.0"/>
  </node>
  <node id="86001" label="PRDX4" cy:nodeId="66491">
    <graphics y="127.96599401031153" x="-17.793623043890534" z="0.0"/>
  </node>
  <node id="84977" label="PIP4K2B" cy:nodeId="67515">
    <graphics y="406.4370671609463" x="299.8150099974913" z="0.0"/>
  </node>
  <node id="85969" label="DPP3" cy:nodeId="66523">
    <graphics y="113.23485005889552" x="48.01429741204208" z="0.0"/>
  </node>
  <node id="84945" label="ALDH16A1" cy:nodeId="67547">
    <graphics y="154.47975362334864" x="-118.92505653082901" z="0.0"/>
  </node>
  <node id="85937" label="RENBP" cy:nodeId="66555">
    <graphics y="-39.509069313663076" x="156.56189720452255" z="0.0"/>
  </node>
  <node id="84913" label="UBTF" cy:nodeId="67579">
    <graphics y="-76.83681284393651" x="-53.73080260932022" z="0.0"/>
  </node>
  <node id="85904" label="CLEC14A" cy:nodeId="66588">
    <graphics y="383.6404668191494" x="169.34981529534286" z="0.0"/>
  </node>
  <node id="84880" label="POLR3C" cy:nodeId="67612">
    <graphics y="222.60231984649317" x="-63.563074185247956" z="0.0"/>
  </node>
  <node id="85872" label="EARS2" cy:nodeId="66620">
    <graphics y="-100.2637385031162" x="-108.27160651862198" z="0.0"/>
  </node>
  <node id="84848" label="RTN4IP1" cy:nodeId="67644">
    <graphics y="322.32132924590724" x="16.981544421319427" z="0.0"/>
  </node>
  <node id="85840" label="FUNDC1" cy:nodeId="66652">
    <graphics y="-81.98209177460058" x="-92.27955253302628" z="0.0"/>
  </node>
  <node id="84816" label="SRRD" cy:nodeId="67676">
    <graphics y="-184.6226252218662" x="518.44165794671" z="0.0"/>
  </node>
  <node id="85808" label="POLR3K" cy:nodeId="66684">
    <graphics y="148.38751424346583" x="175.480216906671" z="0.0"/>
  </node>
  <node id="84784" label="ALKBH4" cy:nodeId="67708">
    <graphics y="239.98647511993067" x="582.9525832396788" z="0.0"/>
  </node>
  <node id="85776" label="ARPC1B" cy:nodeId="66716">
    <graphics y="37.85922826324122" x="160.45969383538193" z="0.0"/>
  </node>
  <node id="84752" label="URB2" cy:nodeId="67740">
    <graphics y="-151.47380625213964" x="440.2804640990538" z="0.0"/>
  </node>
  <node id="85744" label="RABEP2" cy:nodeId="66748">
    <graphics y="497.2286931375088" x="-59.789180828924714" z="0.0"/>
  </node>
  <node id="84720" label="CACNB1" cy:nodeId="67772">
    <graphics y="445.8337651589932" x="261.1401137572569" z="0.0"/>
  </node>
  <node id="85712" label="SLC39A3" cy:nodeId="66780">
    <graphics y="329.3824712136807" x="-145.0238114136415" z="0.0"/>
  </node>
  <node id="84688" label="KCTD5" cy:nodeId="67804">
    <graphics y="-29.311742653506826" x="428.8489455443663" z="0.0"/>
  </node>
  <node id="85680" label="SDCCAG3" cy:nodeId="66812">
    <graphics y="-46.304586281436514" x="189.12288658440536" z="0.0"/>
  </node>
  <node id="84656" label="PIGM" cy:nodeId="67836">
    <graphics y="234.62514699493067" x="-395.93566138922745" z="0.0"/>
  </node>
  <node id="85648" label="HYAL2" cy:nodeId="66844">
    <graphics y="417.2218572000088" x="435.87049095452255" z="0.0"/>
  </node>
  <node id="84624" label="LRP2BP" cy:nodeId="67868">
    <graphics y="-34.976049294131826" x="-401.81005103766495" z="0.0"/>
  </node>
  <node id="85616" label="EHMT2" cy:nodeId="66876">
    <graphics y="266.5734197000088" x="2.1797293883604425" z="0.0"/>
  </node>
  <node id="84592" label="OST4" cy:nodeId="67900">
    <graphics y="410.5596257546963" x="-237.34775550543839" z="0.0"/>
  </node>
  <node id="85584" label="NSDHL" cy:nodeId="66908">
    <graphics y="39.73484624419825" x="-173.36721046149307" z="0.0"/>
  </node>
  <node id="84560" label="DRC1" cy:nodeId="67932">
    <graphics y="-595.7667292257725" x="-642.8333054321962" z="0.0"/>
  </node>
  <node id="85552" label="SLC37A4" cy:nodeId="66940">
    <graphics y="-52.163167824405264" x="118.69841759026474" z="0.0"/>
  </node>
  <node id="84528" label="ZMYND12" cy:nodeId="67964">
    <graphics y="-497.2771662374912" x="-555.374992443915" z="0.0"/>
  </node>
  <node id="85520" label="RAD51" cy:nodeId="66972">
    <graphics y="-112.05116831268651" x="81.76583092034286" z="0.0"/>
  </node>
  <node id="85488" label="C21orf67" cy:nodeId="67004">
    <graphics y="325.31452382598536" x="438.4197158080382" z="0.0"/>
  </node>
  <node id="85456" label="BRCC3" cy:nodeId="67036">
    <graphics y="259.5130864480557" x="41.3013381224913" z="0.0"/>
  </node>
  <node id="85424" label="PIGO" cy:nodeId="67068">
    <graphics y="400.16955007110255" x="-133.60677344977432" z="0.0"/>
  </node>
  <node id="85392" label="GOT1" cy:nodeId="67100">
    <graphics y="-188.88843332733495" x="429.1187514525694" z="0.0"/>
  </node>
  <node id="85360" label="POLR3H" cy:nodeId="67132">
    <graphics y="-52.92390238251073" x="120.68694298088974" z="0.0"/>
  </node>
  <node id="85328" label="LRRC25" cy:nodeId="67164">
    <graphics y="233.49633229766505" x="245.5539015990538" z="0.0"/>
  </node>
  <node id="85296" label="MBIP" cy:nodeId="67196">
    <graphics y="93.78154195342677" x="-311.76610572516495" z="0.0"/>
  </node>
  <node id="85264" label="UQCRQ" cy:nodeId="67228">
    <graphics y="21.080034385067393" x="100.50675194085068" z="0.0"/>
  </node>
  <node id="85232" label="ZBED3" cy:nodeId="67260">
    <graphics y="-391.6181391378818" x="-240.77851112067276" z="0.0"/>
  </node>
  <node id="85200" label="G6PC3" cy:nodeId="67292">
    <graphics y="454.3582097390713" x="-159.49334724127823" z="0.0"/>
  </node>
  <node id="85168" label="ARNT" cy:nodeId="67324">
    <graphics y="-76.60269724335058" x="-178.96613319098526" z="0.0"/>
  </node>
  <node id="85136" label="SPAG8" cy:nodeId="67356">
    <graphics y="-702.38184153046" x="-420.0609360474306" z="0.0"/>
  </node>
  <node id="85104" label="TIGD4" cy:nodeId="67388">
    <graphics y="-758.2117365499912" x="-686.7215500611024" z="0.0"/>
  </node>
  <node id="85072" label="ARID2" cy:nodeId="67420">
    <graphics y="-615.3839167257725" x="-478.74022681891495" z="0.0"/>
  </node>
  <node id="85040" label="ATF6" cy:nodeId="67452">
    <graphics y="-72.82326303924901" x="-650.4628220337587" z="0.0"/>
  </node>
  <node id="86032" label="TMEM177" cy:nodeId="66460">
    <graphics y="70.26422894988673" x="78.64436333001083" z="0.0"/>
  </node>
  <node id="85008" label="ABCC10" cy:nodeId="67484">
    <graphics y="33.10147679839747" x="53.77793876946396" z="0.0"/>
  </node>
  <node id="86000" label="DOLPP1" cy:nodeId="66492">
    <graphics y="241.60354054961817" x="154.3427199584288" z="0.0"/>
  </node>
  <node id="84976" label="CA12" cy:nodeId="67516">
    <graphics y="-227.83496653045995" x="-102.38143165289932" z="0.0"/>
  </node>
  <node id="85968" label="CAPN3" cy:nodeId="66524">
    <graphics y="125.46029103789942" x="-9.77356727301651" z="0.0"/>
  </node>
  <node id="84944" label="SNRNP40" cy:nodeId="67548">
    <graphics y="-198.47269236053808" x="9.170787737969817" z="0.0"/>
  </node>
  <node id="85936" label="CSTF2" cy:nodeId="66556">
    <graphics y="247.52814687286036" x="116.92237083733505" z="0.0"/>
  </node>
  <node id="84912" label="REXO4" cy:nodeId="67580">
    <graphics y="-57.81567942108495" x="-4.764907910223542" z="0.0"/>
  </node>
  <node id="85903" label="KCNJ15" cy:nodeId="66589">
    <graphics y="-78.78496347870214" x="-167.98998267828995" z="0.0"/>
  </node>
  <node id="84879" label="ZNF212" cy:nodeId="67613">
    <graphics y="456.2326299050869" x="-7.3233223694520575" z="0.0"/>
  </node>
  <node id="85871" label="TDRKH" cy:nodeId="66621">
    <graphics y="90.23046506438868" x="-92.52425773322159" z="0.0"/>
  </node>
  <node id="84847" label="MESP1" cy:nodeId="67645">
    <graphics y="-383.98682199920995" x="53.83019249260849" z="0.0"/>
  </node>
  <node id="85839" label="ABCB8" cy:nodeId="66653">
    <graphics y="57.586136947018076" x="360.0927199584288" z="0.0"/>
  </node>
  <node id="84815" label="RPIA" cy:nodeId="67677">
    <graphics y="131.27863515411036" x="403.2766799193663" z="0.0"/>
  </node>
  <node id="85807" label="SNRPC" cy:nodeId="66685">
    <graphics y="228.16486562286036" x="-245.7429734009462" z="0.0"/>
  </node>
  <node id="84783" label="RNF26" cy:nodeId="67709">
    <graphics y="97.6905785897793" x="484.18616478264755" z="0.0"/>
  </node>
  <node id="85775" label="WBSCR16" cy:nodeId="66717">
    <graphics y="-77.80501352753026" x="222.92429344475693" z="0.0"/>
  </node>
  <node id="84751" label="CD14" cy:nodeId="67741">
    <graphics y="399.1761113503994" x="-26.80901057898575" z="0.0"/>
  </node>
  <node id="85743" label="MILR1" cy:nodeId="66749">
    <graphics y="131.31164754424708" x="-164.75296790778214" z="0.0"/>
  </node>
  <node id="84719" label="CHCHD4" cy:nodeId="67773">
    <graphics y="-275.22925363983495" x="-46.079402996893464" z="0.0"/>
  </node>
  <node id="85711" label="TMEM141" cy:nodeId="66781">
    <graphics y="347.8346196511807" x="63.4660109740538" z="0.0"/>
  </node>
  <node id="84687" label="SLC9A3R2" cy:nodeId="67805">
    <graphics y="558.6167851785244" x="134.0767287474913" z="0.0"/>
  </node>
  <node id="85679" label="MRPL27" cy:nodeId="66813">
    <graphics y="-99.90358530487401" x="89.00371544182724" z="0.0"/>
  </node>
  <node id="84655" label="NINJ2" cy:nodeId="67837">
    <graphics y="247.65804494414942" x="206.42867271721786" z="0.0"/>
  </node>
  <node id="85647" label="MLYCD" cy:nodeId="66845">
    <graphics y="-60.657613625186514" x="14.884483264092864" z="0.0"/>
  </node>
  <node id="84623" label="FASTKD5" cy:nodeId="67869">
    <graphics y="-284.2671869894443" x="297.76953880608505" z="0.0"/>
  </node>
  <node id="85615" label="STAC3" cy:nodeId="66877">
    <graphics y="-29.33728586639745" x="603.3812331420226" z="0.0"/>
  </node>
  <node id="84591" label="C1orf123" cy:nodeId="67901">
    <graphics y="672.0323430398525" x="178.35520164788193" z="0.0"/>
  </node>
  <node id="85583" label="C19orf24" cy:nodeId="66909">
    <graphics y="-16.873853554385732" x="133.65076439202255" z="0.0"/>
  </node>
  <node id="84559" label="ESPN" cy:nodeId="67933">
    <graphics y="-593.7239435812412" x="-667.6420212525087" z="0.0"/>
  </node>
  <node id="85551" label="ADAP1" cy:nodeId="66941">
    <graphics y="198.08677876983302" x="353.3545912963194" z="0.0"/>
  </node>
  <node id="84527" label="AK7" cy:nodeId="67965">
    <graphics y="-490.3710383078037" x="-478.6995468872743" z="0.0"/>
  </node>
  <node id="85519" label="SHMT2" cy:nodeId="66973">
    <graphics y="192.90181935821192" x="-100.43247993170792" z="0.0"/>
  </node>
  <node id="85487" label="TMCO1" cy:nodeId="67005">
    <graphics y="-81.49672495331151" x="51.583946154717864" z="0.0"/>
  </node>
  <node id="85455" label="C19orf40" cy:nodeId="67037">
    <graphics y="53.96449101958888" x="339.7716445189757" z="0.0"/>
  </node>
  <node id="85423" label="PIN1" cy:nodeId="67069">
    <graphics y="351.1121159890713" x="102.86655418694443" z="0.0"/>
  </node>
  <node id="85391" label="SLC25A39" cy:nodeId="67101">
    <graphics y="246.72927297149317" x="88.3107604247374" z="0.0"/>
  </node>
  <node id="85359" label="CPM" cy:nodeId="67133">
    <graphics y="278.469461570126" x="-83.13305289923721" z="0.0"/>
  </node>
  <node id="85327" label="CLPTM1L" cy:nodeId="67165">
    <graphics y="189.94745839629786" x="47.857932971124114" z="0.0"/>
  </node>
  <node id="85295" label="C1orf172" cy:nodeId="67197">
    <graphics y="-151.05502878631933" x="-368.9631882446962" z="0.0"/>
  </node>
  <node id="85263" label="SREBF2" cy:nodeId="67229">
    <graphics y="-90.93701731170995" x="-117.9458313721376" z="0.0"/>
  </node>
  <node id="85231" label="ELF5" cy:nodeId="67261">
    <graphics y="119.38709462676661" x="91.22887413323349" z="0.0"/>
  </node>
  <node id="85199" label="MTIF2" cy:nodeId="67293">
    <graphics y="-125.51489817108495" x="298.8099745971007" z="0.0"/>
  </node>
  <node id="85167" label="BHLHE40" cy:nodeId="67325">
    <graphics y="132.62861455474513" x="-178.2932663696962" z="0.0"/>
  </node>
  <node id="85135" label="C3orf67" cy:nodeId="67357">
    <graphics y="-566.2843073507725" x="-629.439933850165" z="0.0"/>
  </node>
  <node id="85103" label="TCTEX1D1" cy:nodeId="67389">
    <graphics y="-954.15723215546" x="-635.0269089478212" z="0.0"/>
  </node>
  <node id="85071" label="RFX3" cy:nodeId="67421">
    <graphics y="-578.172613014835" x="-504.6283188599306" z="0.0"/>
  </node>
  <node id="85039" label="THRA" cy:nodeId="67453">
    <graphics y="-185.45947824920995" x="-389.2831040161806" z="0.0"/>
  </node>
  <node id="86031" label="KIAA0101" cy:nodeId="66461">
    <graphics y="1.4562245706142676" x="-9.968521191473542" z="0.0"/>
  </node>
  <node id="85007" label="ZSWIM5" cy:nodeId="67485">
    <graphics y="-183.4820002218662" x="-171.59372718512589" z="0.0"/>
  </node>
  <node id="85999" label="MND1" cy:nodeId="66493">
    <graphics y="15.19436467681544" x="310.0707473021788" z="0.0"/>
  </node>
  <node id="84975" label="PUS1" cy:nodeId="67517">
    <graphics y="223.21938527618067" x="17.215774462823333" z="0.0"/>
  </node>
  <node id="85967" label="COPZ1" cy:nodeId="66525">
    <graphics y="87.13221372161524" x="162.2617873412413" z="0.0"/>
  </node>
  <node id="84943" label="CCDC43" cy:nodeId="67549">
    <graphics y="-262.2294672628818" x="138.206779406671" z="0.0"/>
  </node>
  <node id="85935" label="SLC35B1" cy:nodeId="66557">
    <graphics y="142.30304921661036" x="223.63843529046005" z="0.0"/>
  </node>
  <node id="84911" label="NAGK" cy:nodeId="67581">
    <graphics y="84.8594304421963" x="-78.30577094733292" z="0.0"/>
  </node>
  <node id="85902" label="SYS1" cy:nodeId="66590">
    <graphics y="134.03624547515528" x="189.44199364006943" z="0.0"/>
  </node>
  <node id="84878" label="DNAJC28" cy:nodeId="67614">
    <graphics y="172.58839620147364" x="-131.55291755377823" z="0.0"/>
  </node>
  <node id="85870" label="TSSC1" cy:nodeId="66622">
    <graphics y="100.38702214751856" x="-93.12446601569229" z="0.0"/>
  </node>
  <node id="84846" label="MFNG" cy:nodeId="67646">
    <graphics y="39.6946240762295" x="-160.83068854987198" z="0.0"/>
  </node>
  <node id="85838" label="DYX1C1" cy:nodeId="66654">
    <graphics y="-158.94504343475683" x="-62.74233634650284" z="0.0"/>
  </node>
  <node id="84814" label="RFC5" cy:nodeId="67678">
    <graphics y="357.5626469949307" x="15.44226066887802" z="0.0"/>
  </node>
  <node id="85806" label="ARMC6" cy:nodeId="66686">
    <graphics y="236.20397389922755" x="19.437427447442474" z="0.0"/>
  </node>
  <node id="84782" label="SLC25A17" cy:nodeId="67710">
    <graphics y="158.09462941680567" x="600.8444289428038" z="0.0"/>
  </node>
  <node id="85774" label="EMILIN2" cy:nodeId="66718">
    <graphics y="174.72635854278224" x="-199.11139686286026" z="0.0"/>
  </node>
  <node id="84750" label="ZNF385B" cy:nodeId="67742">
    <graphics y="-101.0976008078037" x="-229.1229325073915" z="0.0"/>
  </node>
  <node id="85742" label="TSFM" cy:nodeId="66750">
    <graphics y="12.704145560604502" x="184.84400169671005" z="0.0"/>
  </node>
  <node id="84718" label="PRR15L" cy:nodeId="67774">
    <graphics y="110.96673406158106" x="477.11341087639755" z="0.0"/>
  </node>
  <node id="85710" label="AIMP2" cy:nodeId="66782">
    <graphics y="254.31635488067286" x="33.33300773919052" z="0.0"/>
  </node>
  <node id="84686" label="TMEM186" cy:nodeId="67806">
    <graphics y="427.40075124297755" x="250.36731712639755" z="0.0"/>
  </node>
  <node id="85678" label="FA2H" cy:nodeId="66814">
    <graphics y="463.5891972878994" x="130.12911217034286" z="0.0"/>
  </node>
  <node id="84654" label="GGT1" cy:nodeId="67838">
    <graphics y="507.4733220437588" x="456.3921584349913" z="0.0"/>
  </node>
  <node id="85646" label="ZNF469" cy:nodeId="66846">
    <graphics y="-83.68364511932714" x="330.9115981322569" z="0.0"/>
  </node>
  <node id="84622" label="POU2F3" cy:nodeId="67870">
    <graphics y="-105.09494577850683" x="-280.0309067505556" z="0.0"/>
  </node>
  <node id="85614" label="STOML2" cy:nodeId="66878">
    <graphics y="167.43344319854396" x="354.80628197014755" z="0.0"/>
  </node>
  <node id="84590" label="CTDSP1" cy:nodeId="67902">
    <graphics y="404.8143864968838" x="528.6594924193663" z="0.0"/>
  </node>
  <node id="85582" label="SMIM4" cy:nodeId="66910">
    <graphics y="-172.53799997772558" x="83.48653404534286" z="0.0"/>
  </node>
  <node id="84558" label="CCDC65" cy:nodeId="67934">
    <graphics y="-671.6881159445225" x="-485.7777634400087" z="0.0"/>
  </node>
  <node id="85550" label="TCTA" cy:nodeId="66942">
    <graphics y="154.98676503692286" x="400.07398216546005" z="0.0"/>
  </node>
  <node id="84526" label="OSCP1" cy:nodeId="67966">
    <graphics y="-550.7971857687412" x="-585.7393112915712" z="0.0"/>
  </node>
  <node id="85518" label="SLC22A31" cy:nodeId="66974">
    <graphics y="-137.05367075409276" x="-246.20851905524307" z="0.0"/>
  </node>
  <node id="85486" label="HMBS" cy:nodeId="67006">
    <graphics y="30.523889670711924" x="188.32724754631943" z="0.0"/>
  </node>
  <node id="85454" label="TMEM144" cy:nodeId="67038">
    <graphics y="83.17436231170313" x="455.0734633666319" z="0.0"/>
  </node>
  <node id="85422" label="ZSWIM1" cy:nodeId="67070">
    <graphics y="82.33408940826075" x="186.70749656975693" z="0.0"/>
  </node>
  <node id="85390" label="TEX264" cy:nodeId="67102">
    <graphics y="403.26745046172755" x="303.3944472533507" z="0.0"/>
  </node>
  <node id="85358" label="SURF4" cy:nodeId="67134">
    <graphics y="-236.5329035421787" x="238.52298729241318" z="0.0"/>
  </node>
  <node id="85326" label="SLC30A6" cy:nodeId="67166">
    <graphics y="82.72826684508937" x="-261.4811783570009" z="0.0"/>
  </node>
  <node id="85294" label="ALOX15B" cy:nodeId="67198">
    <graphics y="-172.1951807638584" x="-51.43457801520401" z="0.0"/>
  </node>
  <node id="85262" label="USF1" cy:nodeId="67230">
    <graphics y="21.66808522735255" x="5.301917956475677" z="0.0"/>
  </node>
  <node id="85230" label="MYPOP" cy:nodeId="67262">
    <graphics y="-0.09025370087010742" x="52.97331993401474" z="0.0"/>
  </node>
  <node id="85198" label="GPI" cy:nodeId="67294">
    <graphics y="36.45661366973536" x="579.0626906615538" z="0.0"/>
  </node>
  <node id="85166" label="DCLRE1A" cy:nodeId="67326">
    <graphics y="-93.53749643768651" x="13.407047198419036" z="0.0"/>
  </node>
  <node id="85134" label="PPIL6" cy:nodeId="67358">
    <graphics y="-637.3711603781162" x="-547.3134079712587" z="0.0"/>
  </node>
  <node id="85102" label="OTX1" cy:nodeId="67390">
    <graphics y="-650.3317316671787" x="-604.690422131415" z="0.0"/>
  </node>
  <node id="85070" label="RFX5" cy:nodeId="67422">
    <graphics y="-608.4638117453037" x="-540.6309433716493" z="0.0"/>
  </node>
  <node id="85038" label="SCRT1" cy:nodeId="67454">
    <graphics y="-744.4414728781162" x="-886.9999314087587" z="0.0"/>
  </node>
  <node id="86030" label="CYB561D2" cy:nodeId="66462">
    <graphics y="13.42871297393458" x="268.54358665764755" z="0.0"/>
  </node>
  <node id="85006" label="KARS" cy:nodeId="67486">
    <graphics y="-106.06300913299901" x="-185.53517921149307" z="0.0"/>
  </node>
  <node id="85998" label="FAM203A" cy:nodeId="66494">
    <graphics y="184.8221227029385" x="-17.10092551886612" z="0.0"/>
  </node>
  <node id="84974" label="TMEM192" cy:nodeId="67518">
    <graphics y="8.981729636532236" x="106.62534324944443" z="0.0"/>
  </node>
  <node id="85966" label="CHMP4C" cy:nodeId="66526">
    <graphics y="-241.6836603781162" x="-75.38233192145401" z="0.0"/>
  </node>
  <node id="84942" label="ASNA1" cy:nodeId="67550">
    <graphics y="205.44295705352442" x="180.48976890862411" z="0.0"/>
  </node>
  <node id="85934" label="RER1" cy:nodeId="66558">
    <graphics y="155.18300832305567" x="245.2678908568663" z="0.0"/>
  </node>
  <node id="84910" label="PLGRKT" cy:nodeId="67582">
    <graphics y="361.8326970437588" x="297.00501243889755" z="0.0"/>
  </node>
  <node id="85901" label="SRD5A3" cy:nodeId="66591">
    <graphics y="133.12306417022364" x="-70.16344459235245" z="0.0"/>
  </node>
  <node id="84877" label="ACN9" cy:nodeId="67615">
    <graphics y="-327.3597773214756" x="187.66248314202255" z="0.0"/>
  </node>
  <node id="85869" label="MPV17" cy:nodeId="66623">
    <graphics y="303.45926869903224" x="32.166107104424896" z="0.0"/>
  </node>
  <node id="84845" label="TYK2" cy:nodeId="67647">
    <graphics y="380.68700612579005" x="-178.38153846442276" z="0.0"/>
  </node>
  <node id="85837" label="TTI2" cy:nodeId="66655">
    <graphics y="171.95589650664942" x="-215.6407547730165" z="0.0"/>
  </node>
  <node id="84813" label="LSM1" cy:nodeId="67679">
    <graphics y="-65.44254099335058" x="339.2325820189757" z="0.0"/>
  </node>
  <node id="85805" label="ZFYVE19" cy:nodeId="66687">
    <graphics y="272.4056950906338" x="482.77490989983505" z="0.0"/>
  </node>
  <node id="84781" label="SLC4A1AP" cy:nodeId="67711">
    <graphics y="378.1966801980557" x="104.36023704827255" z="0.0"/>
  </node>
  <node id="85773" label="DOK2" cy:nodeId="66719">
    <graphics y="124.28743566070216" x="363.4456557494444" z="0.0"/>
  </node>
  <node id="84749" label="TRAM1" cy:nodeId="67743">
    <graphics y="365.8402348855557" x="-292.79869849860245" z="0.0"/>
  </node>
  <node id="85741" label="DLAT" cy:nodeId="66751">
    <graphics y="-278.6615961691318" x="3.2786559325498956" z="0.0"/>
  </node>
  <node id="84717" label="MRPS22" cy:nodeId="67775">
    <graphics y="-108.57138620819433" x="329.7717971068663" z="0.0"/>
  </node>
  <node id="85709" label="TBL2" cy:nodeId="66783">
    <graphics y="-33.124547829288076" x="338.8153456908507" z="0.0"/>
  </node>
  <node id="84685" label="GLE1" cy:nodeId="67807">
    <graphics y="443.24791921172755" x="13.689403460626067" z="0.0"/>
  </node>
  <node id="85677" label="TSR3" cy:nodeId="66815">
    <graphics y="313.79572499786036" x="-7.716171337957917" z="0.0"/>
  </node>
  <node id="84653" label="SNRPB2" cy:nodeId="67839">
    <graphics y="118.78121007476466" x="570.135261462335" z="0.0"/>
  </node>
  <node id="85645" label="JAGN1" cy:nodeId="66847">
    <graphics y="-87.31799875702245" x="-92.79965980231339" z="0.0"/>
  </node>
  <node id="84621" label="TXNDC5" cy:nodeId="67871">
    <graphics y="-318.0223749777256" x="65.62207023919052" z="0.0"/>
  </node>
  <node id="85613" label="MRS2" cy:nodeId="66879">
    <graphics y="-211.2898615499912" x="109.98239891350693" z="0.0"/>
  </node>
  <node id="84589" label="LSM4" cy:nodeId="67903">
    <graphics y="-34.054967751163076" x="457.4782180053038" z="0.0"/>
  </node>
  <node id="85581" label="TSTA3" cy:nodeId="66911">
    <graphics y="-18.113859047549795" x="-66.48950584113175" z="0.0"/>
  </node>
  <node id="84557" label="NEK5" cy:nodeId="67935">
    <graphics y="-769.0974787374912" x="-632.566886975165" z="0.0"/>
  </node>
  <node id="85549" label="SLX4" cy:nodeId="66943">
    <graphics y="288.3554021218838" x="84.63467399895615" z="0.0"/>
  </node>
  <node id="84525" label="UBXN10" cy:nodeId="67967">
    <graphics y="-699.2798517843662" x="-349.4831162232118" z="0.0"/>
  </node>
  <node id="85517" label="RMI2" cy:nodeId="66975">
    <graphics y="126.26884664092677" x="144.93469993889755" z="0.0"/>
  </node>
  <node id="85485" label="SIGLEC9" cy:nodeId="67007">
    <graphics y="204.33629811797755" x="452.9263686400694" z="0.0"/>
  </node>
  <node id="85453" label="PGBD2" cy:nodeId="67039">
    <graphics y="-15.746999611514639" x="237.57498924553818" z="0.0"/>
  </node>
  <node id="85421" label="NR2F2" cy:nodeId="67071">
    <graphics y="195.40336049590724" x="85.7563170653624" z="0.0"/>
  </node>
  <node id="85389" label="MED8" cy:nodeId="67103">
    <graphics y="5.108423362118174" x="-74.50488670050675" z="0.0"/>
  </node>
  <node id="85357" label="IDH2" cy:nodeId="67135">
    <graphics y="-197.90768991913183" x="-95.78125770270401" z="0.0"/>
  </node>
  <node id="85325" label="NPR1" cy:nodeId="67167">
    <graphics y="498.9099675515713" x="-29.251766278143464" z="0.0"/>
  </node>
  <node id="85293" label="SLC31A2" cy:nodeId="67199">
    <graphics y="241.49747670684474" x="293.7615432006163" z="0.0"/>
  </node>
  <node id="85261" label="PLK1" cy:nodeId="67231">
    <graphics y="-70.67522226776464" x="-57.857940747137604" z="0.0"/>
  </node>
  <node id="85229" label="TYMS" cy:nodeId="67263">
    <graphics y="-133.81914316620214" x="-13.83069617926651" z="0.0"/>
  </node>
  <node id="85197" label="RMND5B" cy:nodeId="67295">
    <graphics y="388.2347661355557" x="27.464729235772552" z="0.0"/>
  </node>
  <node id="85165" label="BPNT1" cy:nodeId="67327">
    <graphics y="309.70861257110255" x="177.87918846428818" z="0.0"/>
  </node>
  <node id="85133" label="ARHGAP39" cy:nodeId="67359">
    <graphics y="-507.0930842062412" x="-431.8129502075868" z="0.0"/>
  </node>
  <node id="85101" label="IFT46" cy:nodeId="67391">
    <graphics y="-437.8052118917881" x="-568.9655075806337" z="0.0"/>
  </node>
  <node id="85069" label="HEYL" cy:nodeId="67423">
    <graphics y="-243.8189142843662" x="-351.7735214966493" z="0.0"/>
  </node>
  <node id="85037" label="SMAD3" cy:nodeId="67455">
    <graphics y="-804.2600763937412" x="-780.347648693915" z="0.0"/>
  </node>
  <node id="86029" label="PTPN13" cy:nodeId="66463">
    <graphics y="25.723863730770518" x="-165.00527198493057" z="0.0"/>
  </node>
  <node id="85005" label="TMEM9B" cy:nodeId="67487">
    <graphics y="-10.102102150577139" x="399.3796157103819" z="0.0"/>
  </node>
  <node id="85997" label="TTC39A" cy:nodeId="66495">
    <graphics y="175.81864369903224" x="-150.36331947028214" z="0.0"/>
  </node>
  <node id="84973" label="FZD8" cy:nodeId="67519">
    <graphics y="188.52061666045802" x="-149.52745826422745" z="0.0"/>
  </node>
  <node id="85965" label="POLR2C" cy:nodeId="66527">
    <graphics y="42.05874265227931" x="-196.4114304321962" z="0.0"/>
  </node>
  <node id="84941" label="TXLNA" cy:nodeId="67551">
    <graphics y="292.3778172830166" x="-144.813972546454" z="0.0"/>
  </node>
  <node id="85933" label="ILDR1" cy:nodeId="66559">
    <graphics y="-6.397321571963857" x="-362.7819138306337" z="0.0"/>
  </node>
  <node id="84909" label="DBNL" cy:nodeId="67583">
    <graphics y="294.9344121316494" x="141.18656151116318" z="0.0"/>
  </node>
</graph>
