# Supplementary material
Source: publisher figshare collection journal article supplement (https://springernature.figshare.com/ndownloader/files/35041376)
Supplement: Supplementary file 1 [file 35041376 › CytoscapeSession-2021_06_28-02_05/views/82125-83398-lung_GRN4TCGA_LUAD.txt_2.xgmml]

<?xml version="1.0" encoding="UTF-8" standalone="yes"?>
<graph id="83398" label="83398" cy:view="1" cy:networkId="82125" cy:visualStyle="default" cy:rendererId="org.cytoscape.ding" cy:documentVersion="3.0" xmlns:dc="http://purl.org/dc/elements/1.1/" xmlns:xlink="http://www.w3.org/1999/xlink" xmlns:rdf="http://www.w3.org/1999/02/22-rdf-syntax-ns#" xmlns:cy="http://www.cytoscape.org" xmlns="http://www.cs.rpi.edu/XGMML">
  <graphics>
    <att name="NETWORK_FORCE_HIGH_DETAIL" value="false" type="string" cy:type="String"/>
    <att name="NETWORK_EDGE_SELECTION" value="true" type="string" cy:type="String"/>
    <att name="NETWORK_TITLE" value="" type="string" cy:type="String"/>
    <att name="NETWORK_WIDTH" value="1251.0" type="string" cy:type="String"/>
    <att name="NETWORK_NODE_SELECTION" value="true" type="string" cy:type="String"/>
    <att name="NETWORK_NODE_LABEL_SELECTION" value="false" type="string" cy:type="String"/>
    <att name="NETWORK_CENTER_X_LOCATION" value="83.3030304527283" type="string" cy:type="String"/>
    <att name="NETWORK_CENTER_Z_LOCATION" value="0.0" type="string" cy:type="String"/>
    <att name="NETWORK_DEPTH" value="0.0" type="string" cy:type="String"/>
    <att name="NETWORK_HEIGHT" value="488.0" type="string" cy:type="String"/>
    <att name="NETWORK_ANNOTATION_SELECTION" value="false" type="string" cy:type="String"/>
    <att name="NETWORK_CENTER_Y_LOCATION" value="138.27250999450686" type="string" cy:type="String"/>
    <att name="NETWORK_SCALE_FACTOR" value="0.47520220976512884" type="string" cy:type="String"/>
  </graphics>
  <node id="83414" label="ACVRL1" cy:nodeId="82144">
    <graphics y="-309.0356317138672" x="52.311043224334725" z="0.0"/>
  </node>
  <node id="83413" label="H2AFY2" cy:nodeId="82145">
    <graphics y="-348.4549432373047" x="-44.37182573318481" z="0.0"/>
  </node>
  <node id="83412" label="ETV6" cy:nodeId="82146">
    <graphics y="-230.23237854003906" x="-35.37683824539184" z="0.0"/>
  </node>
  <node id="83411" label="ABCC5" cy:nodeId="82147">
    <graphics y="-118.05034118652344" x="-176.6893535041809" z="0.0"/>
  </node>
  <node id="83410" label="ETV4" cy:nodeId="82148">
    <graphics y="-205.94075256347656" x="-133.21694520950317" z="0.0"/>
  </node>
  <node id="83409" label="ILVBL" cy:nodeId="82149">
    <graphics y="-101.76982360839844" x="-100.60493091583251" z="0.0"/>
  </node>
  <node id="83408" label="LIMS2" cy:nodeId="82150">
    <graphics y="-130.09733825683594" x="-44.81259492874145" z="0.0"/>
  </node>
  <node id="83407" label="ETV1" cy:nodeId="82151">
    <graphics y="-58.13403564453125" x="21.097977123260506" z="0.0"/>
  </node>
  <node id="83406" label="SYNE4" cy:nodeId="82152">
    <graphics y="128.65223068237304" x="-48.541102924346916" z="0.0"/>
  </node>
  <node id="83405" label="ZWINT" cy:nodeId="82153">
    <graphics y="341.86066955566406" x="-101.9598145866394" z="0.0"/>
  </node>
  <node id="83404" label="C16orf59" cy:nodeId="82154">
    <graphics y="109.19980377197265" x="-145.2079196357727" z="0.0"/>
  </node>
  <node id="83403" label="DUOX1" cy:nodeId="82155">
    <graphics y="311.3787664794922" x="-200.25807146072387" z="0.0"/>
  </node>
  <node id="83402" label="ELK4" cy:nodeId="82156">
    <graphics y="226.12771362304687" x="-120.3948970222473" z="0.0"/>
  </node>
  <node id="83401" label="SMKR1" cy:nodeId="82157">
    <graphics y="-231.63928466796875" x="275.51273771286014" z="0.0"/>
  </node>
  <node id="83400" label="TNS4" cy:nodeId="82158">
    <graphics y="-289.0581689453125" x="242.42281385421754" z="0.0"/>
  </node>
  <node id="83399" label="ARID2" cy:nodeId="82159">
    <graphics y="-348.4549432373047" x="320.564709148407" z="0.0"/>
  </node>
  <node id="83423" label="USF1" cy:nodeId="82135">
    <graphics y="420.9429754638672" x="-180.53063158035278" z="0.0"/>
  </node>
  <node id="83422" label="RFX4" cy:nodeId="82136">
    <graphics y="-205.45785766601563" x="163.96900220870972" z="0.0"/>
  </node>
  <node id="83421" label="RFX3" cy:nodeId="82137">
    <graphics y="-150.92920166015625" x="234.4016651725769" z="0.0"/>
  </node>
  <node id="83420" label="RFX2" cy:nodeId="82138">
    <graphics y="-293.716494140625" x="152.31104322433472" z="0.0"/>
  </node>
  <node id="83419" label="ZNF572" cy:nodeId="82139">
    <graphics y="597.5267156982422" x="-200.25807146072387" z="0.0"/>
  </node>
  <node id="83418" label="KIF20A" cy:nodeId="82140">
    <graphics y="520.9429754638672" x="-124.33324007034301" z="0.0"/>
  </node>
  <node id="83417" label="NR2F6" cy:nodeId="82141">
    <graphics y="624.9999632263184" x="-96.04404024124145" z="0.0"/>
  </node>
  <node id="83416" label="MXI1" cy:nodeId="82142">
    <graphics y="-268.789248046875" x="366.86413236618046" z="0.0"/>
  </node>
  <node id="83415" label="GABPA" cy:nodeId="82143">
    <graphics y="8.128629150390623" x="-76.85484651565551" z="0.0"/>
  </node>
</graph>
