# Supplementary material
Source: publisher figshare collection journal article supplement (https://springernature.figshare.com/ndownloader/files/35041376)
Supplement: Supplementary file 1 [file 35041376 › CytoscapeSession-2021_06_28-02_05/views/82224-83462-lung_GRN4TCGA_LUSC.txt_2.xgmml]

<?xml version="1.0" encoding="UTF-8" standalone="yes"?>
<graph id="83462" label="83462" cy:view="1" cy:networkId="82224" cy:visualStyle="default" cy:rendererId="org.cytoscape.ding" cy:documentVersion="3.0" xmlns:dc="http://purl.org/dc/elements/1.1/" xmlns:xlink="http://www.w3.org/1999/xlink" xmlns:rdf="http://www.w3.org/1999/02/22-rdf-syntax-ns#" xmlns:cy="http://www.cytoscape.org" xmlns="http://www.cs.rpi.edu/XGMML">
  <graphics>
    <att name="NETWORK_FORCE_HIGH_DETAIL" value="false" type="string" cy:type="String"/>
    <att name="NETWORK_EDGE_SELECTION" value="true" type="string" cy:type="String"/>
    <att name="NETWORK_TITLE" value="" type="string" cy:type="String"/>
    <att name="NETWORK_WIDTH" value="1251.0" type="string" cy:type="String"/>
    <att name="NETWORK_NODE_SELECTION" value="true" type="string" cy:type="String"/>
    <att name="NETWORK_NODE_LABEL_SELECTION" value="false" type="string" cy:type="String"/>
    <att name="NETWORK_CENTER_X_LOCATION" value="90.23434770388872" type="string" cy:type="String"/>
    <att name="NETWORK_CENTER_Z_LOCATION" value="0.0" type="string" cy:type="String"/>
    <att name="NETWORK_DEPTH" value="0.0" type="string" cy:type="String"/>
    <att name="NETWORK_HEIGHT" value="488.0" type="string" cy:type="String"/>
    <att name="NETWORK_ANNOTATION_SELECTION" value="false" type="string" cy:type="String"/>
    <att name="NETWORK_CENTER_Y_LOCATION" value="-85.83151836845809" type="string" cy:type="String"/>
    <att name="NETWORK_SCALE_FACTOR" value="0.27284558313897006" type="string" cy:type="String"/>
  </graphics>
  <node id="83710" label="NECAB1" cy:nodeId="82240">
    <graphics y="943.67095355537" x="363.4224580554512" z="0.0"/>
  </node>
  <node id="83678" label="EIF4G1" cy:nodeId="82272">
    <graphics y="690.2872865631825" x="199.55855691714555" z="0.0"/>
  </node>
  <node id="83646" label="ETV2" cy:nodeId="82304">
    <graphics y="784.01763324287" x="219.17572725100786" z="0.0"/>
  </node>
  <node id="83614" label="TP73" cy:nodeId="82336">
    <graphics y="-910.8668272063487" x="-400.1385771007988" z="0.0"/>
  </node>
  <node id="83582" label="EP300" cy:nodeId="82368">
    <graphics y="-856.6922666594737" x="-72.69298994259566" z="0.0"/>
  </node>
  <node id="83550" label="ELK4" cy:nodeId="82400">
    <graphics y="495.93490008857316" x="28.240619066193403" z="0.0"/>
  </node>
  <node id="83518" label="ST3GAL5" cy:nodeId="82432">
    <graphics y="424.4442079499013" x="189.1078408984688" z="0.0"/>
  </node>
  <node id="83486" label="SMARCB1" cy:nodeId="82464">
    <graphics y="200.02633075263566" x="473.50125444216997" z="0.0"/>
  </node>
  <node id="83709" label="MTFMT" cy:nodeId="82241">
    <graphics y="491.96782855537003" x="-80.81683027462691" z="0.0"/>
  </node>
  <node id="83677" label="MRPL36" cy:nodeId="82273">
    <graphics y="490.8048341706044" x="221.85102403445512" z="0.0"/>
  </node>
  <node id="83645" label="GLIS1" cy:nodeId="82305">
    <graphics y="-1038.2706358000987" x="-276.9909025402519" z="0.0"/>
  </node>
  <node id="83613" label="RBPJ" cy:nodeId="82337">
    <graphics y="-1013.7253477141612" x="-207.1228605480644" z="0.0"/>
  </node>
  <node id="83581" label="EGR4" cy:nodeId="82369">
    <graphics y="-919.4812070891612" x="-425.46847212033003" z="0.0"/>
  </node>
  <node id="83549" label="DDIT3" cy:nodeId="82401">
    <graphics y="737.4313905670888" x="-145.51943647579878" z="0.0"/>
  </node>
  <node id="83517" label="SFTPD" cy:nodeId="82433">
    <graphics y="729.6202333405263" x="245.40677774234086" z="0.0"/>
  </node>
  <node id="83485" label="MYO1F" cy:nodeId="82465">
    <graphics y="526.7072084381825" x="366.84170854373247" z="0.0"/>
  </node>
  <node id="83708" label="ACAT2" cy:nodeId="82242">
    <graphics y="253.5337388947255" x="-189.70473921017378" z="0.0"/>
  </node>
  <node id="83676" label="POP5" cy:nodeId="82274">
    <graphics y="525.86724261787" x="114.36421525759965" z="0.0"/>
  </node>
  <node id="83644" label="PROX1" cy:nodeId="82306">
    <graphics y="-961.4952451750987" x="-190.12307417111128" z="0.0"/>
  </node>
  <node id="83612" label="KLF8" cy:nodeId="82338">
    <graphics y="-898.8879453704112" x="-119.99010908322066" z="0.0"/>
  </node>
  <node id="83580" label="NR2F2" cy:nodeId="82370">
    <graphics y="456.10833148505753" x="-87.93185102658003" z="0.0"/>
  </node>
  <node id="83548" label="ARNTL" cy:nodeId="82402">
    <graphics y="642.3656862213857" x="-108.12673628048628" z="0.0"/>
  </node>
  <node id="83516" label="ETV6" cy:nodeId="82434">
    <graphics y="558.498346133495" x="102.7956727771309" z="0.0"/>
  </node>
  <node id="83484" label="SHE" cy:nodeId="82466">
    <graphics y="335.8934572174794" x="102.76510942263872" z="0.0"/>
  </node>
  <node id="83707" label="COQ3" cy:nodeId="82243">
    <graphics y="585.9373414948232" x="-121.61867963986128" z="0.0"/>
  </node>
  <node id="83675" label="TNS3" cy:nodeId="82275">
    <graphics y="248.61377887275285" x="471.96216142459184" z="0.0"/>
  </node>
  <node id="83643" label="ZNF202" cy:nodeId="82307">
    <graphics y="-822.9919492766612" x="-120.38927900509566" z="0.0"/>
  </node>
  <node id="83611" label="KLF3" cy:nodeId="82339">
    <graphics y="-837.67523785088" x="-303.89474165158003" z="0.0"/>
  </node>
  <node id="83579" label="CDH12" cy:nodeId="82371">
    <graphics y="-912.8319789931529" x="656.0723832873848" z="0.0"/>
  </node>
  <node id="83547" label="NABP2" cy:nodeId="82403">
    <graphics y="680.7297304108388" x="99.65924394412309" z="0.0"/>
  </node>
  <node id="83515" label="NKX2-1" cy:nodeId="82435">
    <graphics y="496.66195086982316" x="181.50556505008012" z="0.0"/>
  </node>
  <node id="83483" label="SFTA3" cy:nodeId="82467">
    <graphics y="588.66509418037" x="248.31595552249223" z="0.0"/>
  </node>
  <node id="83706" label="TIPIN" cy:nodeId="82244">
    <graphics y="338.04891376044816" x="-111.17303144650191" z="0.0"/>
  </node>
  <node id="83674" label="MFNG" cy:nodeId="82276">
    <graphics y="354.8339784577138" x="183.4550203113106" z="0.0"/>
  </node>
  <node id="83642" label="ZBTB4" cy:nodeId="82308">
    <graphics y="-820.3067075774425" x="-387.88937055783003" z="0.0"/>
  </node>
  <node id="83610" label="GLIS3" cy:nodeId="82340">
    <graphics y="-977.2076475188487" x="-353.40450727658003" z="0.0"/>
  </node>
  <node id="83578" label="UCP1" cy:nodeId="82372">
    <graphics y="-1109.9045378730052" x="781.6254380969551" z="0.0"/>
  </node>
  <node id="83546" label="C2orf44" cy:nodeId="82404">
    <graphics y="639.3621461823232" x="143.76404893679887" z="0.0"/>
  </node>
  <node id="83514" label="SFTA2" cy:nodeId="82436">
    <graphics y="683.2222841217763" x="174.62335908694536" z="0.0"/>
  </node>
  <node id="83482" label="TGFBR2" cy:nodeId="82468">
    <graphics y="399.9956300690419" x="239.1155370502022" z="0.0"/>
  </node>
  <node id="83705" label="MRPL46" cy:nodeId="82245">
    <graphics y="541.0524843170888" x="-124.68417036251753" z="0.0"/>
  </node>
  <node id="83673" label="STEAP4" cy:nodeId="82277">
    <graphics y="153.3226030304677" x="442.93074357791215" z="0.0"/>
  </node>
  <node id="83641" label="ASCL1" cy:nodeId="82309">
    <graphics y="-964.8783018157237" x="-309.7492948742363" z="0.0"/>
  </node>
  <node id="83609" label="HIVEP2" cy:nodeId="82341">
    <graphics y="-1089.8109190032237" x="-229.71166670040816" z="0.0"/>
  </node>
  <node id="83577" label="TSPY8" cy:nodeId="82373">
    <graphics y="-1028.3671047255748" x="596.270053270295" z="0.0"/>
  </node>
  <node id="83545" label="PITX2" cy:nodeId="82405">
    <graphics y="505.2935731842763" x="-11.398846265837847" z="0.0"/>
  </node>
  <node id="83513" label="ETV3" cy:nodeId="82437">
    <graphics y="600.5077150299794" x="80.11108720584184" z="0.0"/>
  </node>
  <node id="83481" label="CAPN8" cy:nodeId="82469">
    <graphics y="572.4746339752919" x="112.28904283328325" z="0.0"/>
  </node>
  <node id="83704" label="GTF2A2" cy:nodeId="82246">
    <graphics y="548.7606752350575" x="-9.583035108611284" z="0.0"/>
  </node>
  <node id="83672" label="CPM" cy:nodeId="82278">
    <graphics y="105.38764743354386" x="363.48611772341997" z="0.0"/>
  </node>
  <node id="83640" label="ZIC1" cy:nodeId="82310">
    <graphics y="-732.1045591399425" x="-319.8915067882988" z="0.0"/>
  </node>
  <node id="83608" label="KLF4" cy:nodeId="82342">
    <graphics y="-998.9705869719737" x="-380.23714887814253" z="0.0"/>
  </node>
  <node id="83576" label="JUN" cy:nodeId="82374">
    <graphics y="-1015.4533550307506" x="711.5498279361275" z="0.0"/>
  </node>
  <node id="83544" label="TOPORS" cy:nodeId="82406">
    <graphics y="388.6651857331044" x="-2.522030469939409" z="0.0"/>
  </node>
  <node id="83512" label="KNSTRN" cy:nodeId="82438">
    <graphics y="433.4350831940419" x="-54.573269483611284" z="0.0"/>
  </node>
  <node id="83480" label="CD97" cy:nodeId="82470">
    <graphics y="426.10674457099503" x="309.20215165896684" z="0.0"/>
  </node>
  <node id="83703" label="FAM103A1" cy:nodeId="82247">
    <graphics y="497.42025165107316" x="-131.7932707043144" z="0.0"/>
  </node>
  <node id="83671" label="HCLS1" cy:nodeId="82279">
    <graphics y="376.3867128327138" x="122.46653306765825" z="0.0"/>
  </node>
  <node id="83639" label="HIC2" cy:nodeId="82311">
    <graphics y="-787.869329647755" x="-178.38451826290816" z="0.0"/>
  </node>
  <node id="83607" label="MZF1" cy:nodeId="82343">
    <graphics y="-817.9851743743175" x="-255.50631391720503" z="0.0"/>
  </node>
  <node id="83575" label="CFB" cy:nodeId="82375">
    <graphics y="540.73540668037" x="453.3224977283028" z="0.0"/>
  </node>
  <node id="83543" label="SIX5" cy:nodeId="82407">
    <graphics y="297.8441408112294" x="288.9146226672676" z="0.0"/>
  </node>
  <node id="83511" label="TRIM16L" cy:nodeId="82439">
    <graphics y="469.9123475983388" x="86.80559099002153" z="0.0"/>
  </node>
  <node id="83479" label="CDC45" cy:nodeId="82471">
    <graphics y="204.92957477119035" x="315.68355119509965" z="0.0"/>
  </node>
  <node id="83702" label="POLR3K" cy:nodeId="82248">
    <graphics y="402.64376239326066" x="-135.06564008908003" z="0.0"/>
  </node>
  <node id="83670" label="PCNA" cy:nodeId="82280">
    <graphics y="102.90211658027238" x="317.5937684802559" z="0.0"/>
  </node>
  <node id="83638" label="MLXIPL" cy:nodeId="82312">
    <graphics y="-1009.4250547454112" x="-174.46572553829878" z="0.0"/>
  </node>
  <node id="83606" label="REST" cy:nodeId="82344">
    <graphics y="-872.7546445891612" x="-431.1688505382988" z="0.0"/>
  </node>
  <node id="83574" label="ZBTB33" cy:nodeId="82376">
    <graphics y="465.2149599030263" x="349.45254838748247" z="0.0"/>
  </node>
  <node id="83542" label="PSMA4" cy:nodeId="82408">
    <graphics y="563.8146913483388" x="-219.84994184689253" z="0.0"/>
  </node>
  <node id="83510" label="WNT5A" cy:nodeId="82440">
    <graphics y="446.5954530670888" x="-109.84548628048628" z="0.0"/>
  </node>
  <node id="83478" label="ITGB2" cy:nodeId="82472">
    <graphics y="447.37008075263566" x="451.75117814822465" z="0.0"/>
  </node>
  <node id="83701" label="DSCC1" cy:nodeId="82249">
    <graphics y="377.21550921943253" x="-77.86971723751753" z="0.0"/>
  </node>
  <node id="83669" label="MND1" cy:nodeId="82281">
    <graphics y="504.48296527412003" x="236.87835729403764" z="0.0"/>
  </node>
  <node id="83637" label="BHLHE41" cy:nodeId="82313">
    <graphics y="-899.7636777922862" x="-410.48971235470503" z="0.0"/>
  </node>
  <node id="83605" label="ZBTB7C" cy:nodeId="82345">
    <graphics y="-1103.1900693938487" x="-171.33749067501753" z="0.0"/>
  </node>
  <node id="83573" label="ARID2" cy:nodeId="82377">
    <graphics y="-711.2303525969737" x="-250.54848921017378" z="0.0"/>
  </node>
  <node id="83541" label="NR2F6" cy:nodeId="82409">
    <graphics y="474.5930116608388" x="-166.4677091808769" z="0.0"/>
  </node>
  <node id="83509" label="MC4R" cy:nodeId="82441">
    <graphics y="626.00493793037" x="121.59588182254106" z="0.0"/>
  </node>
  <node id="83477" label="VWF" cy:nodeId="82473">
    <graphics y="229.71886615302628" x="116.44161546511918" z="0.0"/>
  </node>
  <node id="83700" label="PSAT1" cy:nodeId="82250">
    <graphics y="448.7242372467763" x="89.92254960818559" z="0.0"/>
  </node>
  <node id="83668" label="DRG1" cy:nodeId="82282">
    <graphics y="171.02593020942277" x="271.2855180530098" z="0.0"/>
  </node>
  <node id="83636" label="ATOH8" cy:nodeId="82314">
    <graphics y="-977.0161191985362" x="-270.4259306164238" z="0.0"/>
  </node>
  <node id="83604" label="MYOD1" cy:nodeId="82346">
    <graphics y="-913.9517881438487" x="-149.5635343761894" z="0.0"/>
  </node>
  <node id="83572" label="RFX5" cy:nodeId="82378">
    <graphics y="-670.92670269463" x="-305.3066679211113" z="0.0"/>
  </node>
  <node id="83540" label="TRAIP" cy:nodeId="82410">
    <graphics y="671.3400209381825" x="-157.34191572384566" z="0.0"/>
  </node>
  <node id="83508" label="ELF4" cy:nodeId="82442">
    <graphics y="516.97124652412" x="41.43330705447465" z="0.0"/>
  </node>
  <node id="83476" label="CCR1" cy:nodeId="82474">
    <graphics y="281.9012697174794" x="404.1524843005684" z="0.0"/>
  </node>
  <node id="83699" label="VWA9" cy:nodeId="82251">
    <graphics y="600.1250856354482" x="-67.02969038204878" z="0.0"/>
  </node>
  <node id="83667" label="CD180" cy:nodeId="82283">
    <graphics y="494.77056293037003" x="50.35803544802934" z="0.0"/>
  </node>
  <node id="83635" label="TP53" cy:nodeId="82315">
    <graphics y="-957.8476621672862" x="-375.6487089367363" z="0.0"/>
  </node>
  <node id="83603" label="CTCF" cy:nodeId="82347">
    <graphics y="-1057.5325986907237" x="-183.60000288204878" z="0.0"/>
  </node>
  <node id="83571" label="EOMES" cy:nodeId="82379">
    <graphics y="-513.8357603118175" x="-623.4588285656425" z="0.0"/>
  </node>
  <node id="83539" label="SKP2" cy:nodeId="82411">
    <graphics y="388.69593219306535" x="-182.53365766720503" z="0.0"/>
  </node>
  <node id="83507" label="RHOBTB2" cy:nodeId="82443">
    <graphics y="361.9213655426747" x="28.25769365115434" z="0.0"/>
  </node>
  <node id="83475" label="ALDH3B1" cy:nodeId="82475">
    <graphics y="418.8137147858388" x="350.29685533328325" z="0.0"/>
  </node>
  <node id="83698" label="PTPLAD1" cy:nodeId="82252">
    <graphics y="594.0958497956044" x="-27.345501539275347" z="0.0"/>
  </node>
  <node id="83666" label="TOMM22" cy:nodeId="82284">
    <graphics y="207.3958986237294" x="423.9874910144356" z="0.0"/>
  </node>
  <node id="83634" label="FOXK1" cy:nodeId="82316">
    <graphics y="-876.3213560149425" x="-346.34371626095503" z="0.0"/>
  </node>
  <node id="83602" label="CLOCK" cy:nodeId="82348">
    <graphics y="-776.60980816338" x="-71.70162641720503" z="0.0"/>
  </node>
  <node id="83570" label="RFX4" cy:nodeId="82380">
    <graphics y="-699.0393735930675" x="-211.57690107540816" z="0.0"/>
  </node>
  <node id="83538" label="C15orf40" cy:nodeId="82412">
    <graphics y="401.4119813874013" x="-76.98550092892378" z="0.0"/>
  </node>
  <node id="83506" label="SLC22A31" cy:nodeId="82444">
    <graphics y="573.9639833405263" x="7.726657274201216" z="0.0"/>
  </node>
  <node id="83474" label="TOR4A" cy:nodeId="82476">
    <graphics y="362.9589784577138" x="154.9536546496895" z="0.0"/>
  </node>
  <node id="83697" label="SUV39H1" cy:nodeId="82253">
    <graphics y="266.1425722077138" x="79.27730119509965" z="0.0"/>
  </node>
  <node id="83665" label="ASAH1" cy:nodeId="82285">
    <graphics y="245.2251680329091" x="430.6139100818184" z="0.0"/>
  </node>
  <node id="83633" label="ZHX1" cy:nodeId="82317">
    <graphics y="-882.0620176360362" x="-490.39120161251753" z="0.0"/>
  </node>
  <node id="83601" label="SCRT1" cy:nodeId="82349">
    <graphics y="-934.9431211516612" x="-288.82503950314253" z="0.0"/>
  </node>
  <node id="83569" label="RFX3" cy:nodeId="82381">
    <graphics y="-668.3071958586925" x="-363.28207075314253" z="0.0"/>
  </node>
  <node id="83537" label="RAD51" cy:nodeId="82413">
    <graphics y="407.62407855537003" x="-10.781994459197222" z="0.0"/>
  </node>
  <node id="83505" label="NLRP9" cy:nodeId="82445">
    <graphics y="648.6007020905263" x="103.6320985583809" z="0.0"/>
  </node>
  <node id="83473" label="LRRC25" cy:nodeId="82477">
    <graphics y="359.8990419342763" x="461.5719941882637" z="0.0"/>
  </node>
  <node id="83696" label="LIN9" cy:nodeId="82254">
    <graphics y="289.82259540107316" x="-65.29800092892378" z="0.0"/>
  </node>
  <node id="83664" label="GALNT10" cy:nodeId="82286">
    <graphics y="371.4318788483388" x="49.56145036502153" z="0.0"/>
  </node>
  <node id="83632" label="ZBTB7A" cy:nodeId="82318">
    <graphics y="-958.9364072844737" x="-495.86825239376753" z="0.0"/>
  </node>
  <node id="83600" label="TFCP2L1" cy:nodeId="82350">
    <graphics y="-1053.3635313079112" x="-342.2613798351738" z="0.0"/>
  </node>
  <node id="83568" label="SFTPA2" cy:nodeId="82382">
    <graphics y="-586.8284360930675" x="-430.68063032345503" z="0.0"/>
  </node>
  <node id="83536" label="YEATS4" cy:nodeId="82414">
    <graphics y="222.58420733954972" x="-82.88680708126753" z="0.0"/>
  </node>
  <node id="83504" label="BRCA1" cy:nodeId="82446">
    <graphics y="565.8161256745107" x="237.67174947543413" z="0.0"/>
  </node>
  <node id="83472" label="NRF1" cy:nodeId="82478">
    <graphics y="310.7167756989247" x="259.71767747683793" z="0.0"/>
  </node>
  <node id="83695" label="GINS1" cy:nodeId="82255">
    <graphics y="470.8026369049794" x="-7.688946363494097" z="0.0"/>
  </node>
  <node id="83663" label="NDUFS6" cy:nodeId="82287">
    <graphics y="351.71770648505753" x="417.3229249743965" z="0.0"/>
  </node>
  <node id="83631" label="NFIX" cy:nodeId="82319">
    <graphics y="-821.78510113213" x="-98.71624433712691" z="0.0"/>
  </node>
  <node id="83599" label="PAX1" cy:nodeId="82351">
    <graphics y="-848.8008482024425" x="-140.05297529415816" z="0.0"/>
  </node>
  <node id="83567" label="RFX2" cy:nodeId="82383">
    <graphics y="-652.893255429005" x="-318.6214872570488" z="0.0"/>
  </node>
  <node id="83535" label="RNASEH2A" cy:nodeId="82415">
    <graphics y="534.2819765045888" x="-16.285565015837847" z="0.0"/>
  </node>
  <node id="83503" label="DNAJC19" cy:nodeId="82447">
    <graphics y="103.78471927192277" x="67.48437822146684" z="0.0"/>
  </node>
  <node id="83471" label="TP63" cy:nodeId="82479">
    <graphics y="-651.3003599211925" x="-177.9108244152519" z="0.0"/>
  </node>
  <node id="83694" label="PRIM1" cy:nodeId="82256">
    <graphics y="552.9789979889638" x="-248.92968427853316" z="0.0"/>
  </node>
  <node id="83662" label="ARHGDIB" cy:nodeId="82288">
    <graphics y="315.74964313056535" x="432.625293138459" z="0.0"/>
  </node>
  <node id="83630" label="HIF1A" cy:nodeId="82320">
    <graphics y="-988.7340147063487" x="-405.2314726086113" z="0.0"/>
  </node>
  <node id="83598" label="E2F1" cy:nodeId="82352">
    <graphics y="843.9671571686513" x="201.31172502322465" z="0.0"/>
  </node>
  <node id="83566" label="TGM3" cy:nodeId="82384">
    <graphics y="-626.7497617766612" x="-535.160610792205" z="0.0"/>
  </node>
  <node id="83534" label="COX5A" cy:nodeId="82416">
    <graphics y="437.7207277252919" x="-48.369595167205034" z="0.0"/>
  </node>
  <node id="83502" label="CENPO" cy:nodeId="82448">
    <graphics y="301.61492328193253" x="-114.21017133908003" z="0.0"/>
  </node>
  <node id="83470" label="STK33" cy:nodeId="82480">
    <graphics y="-271.86505718681747" x="-30.28417646603316" z="0.0"/>
  </node>
  <node id="83693" label="GINS2" cy:nodeId="82257">
    <graphics y="265.4076631500966" x="-168.7378507824394" z="0.0"/>
  </node>
  <node id="83661" label="DPEP2" cy:nodeId="82289">
    <graphics y="276.1500184967763" x="199.86866128726274" z="0.0"/>
  </node>
  <node id="83629" label="GMEB2" cy:nodeId="82321">
    <graphics y="-789.2847349211925" x="-405.9566923351738" z="0.0"/>
  </node>
  <node id="83597" label="ZBED1" cy:nodeId="82353">
    <graphics y="-833.4102842375987" x="-157.04357588009566" z="0.0"/>
  </node>
  <node id="83565" label="RFX1" cy:nodeId="82385">
    <graphics y="-582.2014829680675" x="-649.125454542205" z="0.0"/>
  </node>
  <node id="83533" label="SPC25" cy:nodeId="82417">
    <graphics y="367.59375934150285" x="-180.91238081173628" z="0.0"/>
  </node>
  <node id="83501" label="SMARCC2" cy:nodeId="82449">
    <graphics y="251.5071504547841" x="55.381930711701216" z="0.0"/>
  </node>
  <node id="83469" label="GSTA1" cy:nodeId="82481">
    <graphics y="-593.9839536711925" x="-221.83993208126753" z="0.0"/>
  </node>
  <node id="83692" label="TMEM79" cy:nodeId="82258">
    <graphics y="588.3841798737294" x="34.529879930451216" z="0.0"/>
  </node>
  <node id="83660" label="PES1" cy:nodeId="82290">
    <graphics y="162.57739429023331" x="340.575732591584" z="0.0"/>
  </node>
  <node id="83628" label="ESRRA" cy:nodeId="82322">
    <graphics y="-907.5911924407237" x="-64.44067060665816" z="0.0"/>
  </node>
  <node id="83596" label="MYBL1" cy:nodeId="82354">
    <graphics y="-1089.6445371672862" x="-340.43710005001753" z="0.0"/>
  </node>
  <node id="83564" label="ETV1" cy:nodeId="82386">
    <graphics y="672.7594545319325" x="226.25165164752275" z="0.0"/>
  </node>
  <node id="83532" label="PIK3R6" cy:nodeId="82418">
    <graphics y="268.5767763092763" x="54.921359422638716" z="0.0"/>
  </node>
  <node id="83500" label="ZNF320" cy:nodeId="82450">
    <graphics y="514.4903200104482" x="142.97381151004106" z="0.0"/>
  </node>
  <node id="83468" label="SOX2" cy:nodeId="82482">
    <graphics y="-579.6511899993175" x="-275.09655439572066" z="0.0"/>
  </node>
  <node id="83691" label="NFAM1" cy:nodeId="82259">
    <graphics y="495.61358050849503" x="262.4521783618477" z="0.0"/>
  </node>
  <node id="83659" label="HHIP" cy:nodeId="82291">
    <graphics y="458.2458436920888" x="233.37143647952348" z="0.0"/>
  </node>
  <node id="83627" label="HAND2" cy:nodeId="82323">
    <graphics y="-1066.9964658782237" x="-394.97445356564253" z="0.0"/>
  </node>
  <node id="83595" label="GSC2" cy:nodeId="82355">
    <graphics y="-899.4085752532237" x="-164.50405561642378" z="0.0"/>
  </node>
  <node id="83563" label="ELF3" cy:nodeId="82387">
    <graphics y="617.3996522858388" x="248.24691713137895" z="0.0"/>
  </node>
  <node id="83531" label="CDCA5" cy:nodeId="82419">
    <graphics y="522.9376466706044" x="-167.17080366329878" z="0.0"/>
  </node>
  <node id="83499" label="ELF1" cy:nodeId="82451">
    <graphics y="647.52642230537" x="253.94972169680864" z="0.0"/>
  </node>
  <node id="83467" label="C1orf192" cy:nodeId="82483">
    <graphics y="-889.9066221282237" x="-259.83871137814253" z="0.0"/>
  </node>
  <node id="83690" label="RPUSD2" cy:nodeId="82260">
    <graphics y="502.28963641669816" x="-223.39452802853316" z="0.0"/>
  </node>
  <node id="83658" label="SLAMF8" cy:nodeId="82292">
    <graphics y="210.10049609687394" x="153.2098573474434" z="0.0"/>
  </node>
  <node id="83626" label="ARNT2" cy:nodeId="82324">
    <graphics y="-793.11224956963" x="-440.95956098751753" z="0.0"/>
  </node>
  <node id="83594" label="BHLHE40" cy:nodeId="82356">
    <graphics y="-982.5904600188487" x="-103.87908613400191" z="0.0"/>
  </node>
  <node id="83562" label="EHF" cy:nodeId="82388">
    <graphics y="729.4487245514638" x="143.3053163318184" z="0.0"/>
  </node>
  <node id="83530" label="MVP" cy:nodeId="82420">
    <graphics y="483.1989992096669" x="-264.23681318478316" z="0.0"/>
  </node>
  <node id="83498" label="LPCAT1" cy:nodeId="82452">
    <graphics y="552.0270326569325" x="201.45612657351762" z="0.0"/>
  </node>
  <node id="83466" label="GPX2" cy:nodeId="82484">
    <graphics y="-538.5987608000987" x="-236.07265913204878" z="0.0"/>
  </node>
  <node id="83689" label="ZWINT" cy:nodeId="82261">
    <graphics y="802.72759418037" x="151.63318193240434" z="0.0"/>
  </node>
  <node id="83657" label="SNRPD3" cy:nodeId="82293">
    <graphics y="128.57907514121598" x="397.5623201159981" z="0.0"/>
  </node>
  <node id="83625" label="ENO1" cy:nodeId="82325">
    <graphics y="-1045.1191465422862" x="-108.67010175900191" z="0.0"/>
  </node>
  <node id="83593" label="TFAP2B" cy:nodeId="82357">
    <graphics y="-1025.4681455657237" x="-417.97860395626753" z="0.0"/>
  </node>
  <node id="83561" label="TFEB" cy:nodeId="82389">
    <graphics y="452.3553407624013" x="-206.0593839855644" z="0.0"/>
  </node>
  <node id="83529" label="TMEM45B" cy:nodeId="82421">
    <graphics y="667.3336122467763" x="178.04187333865434" z="0.0"/>
  </node>
  <node id="83497" label="INMT" cy:nodeId="82453">
    <graphics y="412.50692157294816" x="75.96663224978715" z="0.0"/>
  </node>
  <node id="83465" label="AKR1B10" cy:nodeId="82485">
    <graphics y="-410.4023496672862" x="-98.84438764767378" z="0.0"/>
  </node>
  <node id="83688" label="MBIP" cy:nodeId="82262">
    <graphics y="730.4291322663075" x="16.56665361209184" z="0.0"/>
  </node>
  <node id="83656" label="TMEM100" cy:nodeId="82294">
    <graphics y="356.84823016669816" x="109.0505555896309" z="0.0"/>
  </node>
  <node id="83624" label="ZIC4" cy:nodeId="82326">
    <graphics y="-875.39545269463" x="-90.30465376095503" z="0.0"/>
  </node>
  <node id="83592" label="LMO2" cy:nodeId="82358">
    <graphics y="-836.1824399993175" x="-468.23812544064253" z="0.0"/>
  </node>
  <node id="83560" label="KCNQ3" cy:nodeId="82390">
    <graphics y="867.3419740631825" x="425.6037782458809" z="0.0"/>
  </node>
  <node id="83528" label="TROAP" cy:nodeId="82422">
    <graphics y="354.0825899079091" x="-41.49273359493941" z="0.0"/>
  </node>
  <node id="83496" label="LIMS2" cy:nodeId="82454">
    <graphics y="603.9405763581044" x="146.97979295535356" z="0.0"/>
  </node>
  <node id="83464" label="CYP4F11" cy:nodeId="82486">
    <graphics y="-503.73065777275497" x="-28.996975538298784" z="0.0"/>
  </node>
  <node id="83687" label="ARRB1" cy:nodeId="82263">
    <graphics y="679.46636371162" x="40.37584245486528" z="0.0"/>
  </node>
  <node id="83655" label="ZNF74" cy:nodeId="82295">
    <graphics y="122.9745986893422" x="274.3963006763008" z="0.0"/>
  </node>
  <node id="83623" label="SREBF1" cy:nodeId="82327">
    <graphics y="-756.17963238213" x="-349.94186079220503" z="0.0"/>
  </node>
  <node id="83591" label="HSF1" cy:nodeId="82359">
    <graphics y="567.8064821198232" x="-101.16445600704878" z="0.0"/>
  </node>
  <node id="83559" label="ELF5" cy:nodeId="82391">
    <graphics y="784.3942201569325" x="279.0184816150215" z="0.0"/>
  </node>
  <node id="83527" label="RFC5" cy:nodeId="82423">
    <graphics y="330.5387971832997" x="-191.22192060665816" z="0.0"/>
  </node>
  <node id="83495" label="ETV4" cy:nodeId="82455">
    <graphics y="438.32317523505753" x="35.53801286502153" z="0.0"/>
  </node>
  <node id="83463" label="MXI1" cy:nodeId="82487">
    <graphics y="-517.3593809172862" x="-129.01473676876753" z="0.0"/>
  </node>
  <node id="83686" label="VCP" cy:nodeId="82264">
    <graphics y="611.9254396393544" x="8.322650316193403" z="0.0"/>
  </node>
  <node id="83654" label="SIGLEC9" cy:nodeId="82296">
    <graphics y="304.8465822174794" x="482.0036348132637" z="0.0"/>
  </node>
  <node id="83622" label="SMAD2" cy:nodeId="82328">
    <graphics y="-953.0106260344737" x="-442.3426786632988" z="0.0"/>
  </node>
  <node id="83590" label="NR0B1" cy:nodeId="82360">
    <graphics y="-942.7580625579112" x="-171.73153364376753" z="0.0"/>
  </node>
  <node id="83558" label="USF2" cy:nodeId="82392">
    <graphics y="560.3998353913075" x="-44.04717695431441" z="0.0"/>
  </node>
  <node id="83526" label="FOXM1" cy:nodeId="82424">
    <graphics y="161.67312411811417" x="29.319186571076216" z="0.0"/>
  </node>
  <node id="83494" label="CORO1A" cy:nodeId="82456">
    <graphics y="474.82683734443253" x="381.6932100085762" z="0.0"/>
  </node>
  <node id="83685" label="CCDC69" cy:nodeId="82265">
    <graphics y="537.0627077057607" x="161.35319841189653" z="0.0"/>
  </node>
  <node id="83653" label="FGR" cy:nodeId="82297">
    <graphics y="391.37491778876847" x="496.27005327029497" z="0.0"/>
  </node>
  <node id="83621" label="NR5A2" cy:nodeId="82329">
    <graphics y="-732.99555035088" x="-209.09530317501753" z="0.0"/>
  </node>
  <node id="83589" label="YBX1" cy:nodeId="82361">
    <graphics y="-996.0153867766612" x="-317.6218534679863" z="0.0"/>
  </node>
  <node id="83557" label="RFC4" cy:nodeId="82393">
    <graphics y="288.11637286689347" x="-238.36355268673628" z="0.0"/>
  </node>
  <node id="83525" label="ADAL" cy:nodeId="82425">
    <graphics y="496.23125628974503" x="18.600177171662153" z="0.0"/>
  </node>
  <node id="83493" label="MCM5" cy:nodeId="82457">
    <graphics y="169.49361972358292" x="223.24594486041337" z="0.0"/>
  </node>
  <node id="83716" label="KIAA0408" cy:nodeId="82234">
    <graphics y="787.22564105537" x="260.24454438967973" z="0.0"/>
  </node>
  <node id="83684" label="THEMIS2" cy:nodeId="82266">
    <graphics y="559.909967227245" x="291.39282548709184" z="0.0"/>
  </node>
  <node id="83652" label="ACVRL1" cy:nodeId="82298">
    <graphics y="464.23858050849503" x="156.5693315295723" z="0.0"/>
  </node>
  <node id="83620" label="KLF1" cy:nodeId="82330">
    <graphics y="-941.3789121672862" x="-381.02718794064253" z="0.0"/>
  </node>
  <node id="83588" label="AR" cy:nodeId="82362">
    <graphics y="784.5480287506825" x="74.43167436404497" z="0.0"/>
  </node>
  <node id="83556" label="USF1" cy:nodeId="82394">
    <graphics y="438.57158832099503" x="-8.563870069548784" z="0.0"/>
  </node>
  <node id="83524" label="TIMELESS" cy:nodeId="82426">
    <graphics y="190.87254886176652" x="62.66453874392778" z="0.0"/>
  </node>
  <node id="83492" label="ARHGAP30" cy:nodeId="82458">
    <graphics y="387.8135011627919" x="172.24191606326372" z="0.0"/>
  </node>
  <node id="83715" label="CYP4F2" cy:nodeId="82235">
    <graphics y="-908.0299617812389" x="759.5825914172676" z="0.0"/>
  </node>
  <node id="83683" label="FGA" cy:nodeId="82267">
    <graphics y="663.140435977245" x="169.69661653323442" z="0.0"/>
  </node>
  <node id="83651" label="ALDH3A1" cy:nodeId="82299">
    <graphics y="-569.288274960255" x="-262.80477583126753" z="0.0"/>
  </node>
  <node id="83619" label="ID4" cy:nodeId="82331">
    <graphics y="-862.1071836516612" x="-199.77514326290816" z="0.0"/>
  </node>
  <node id="83587" label="ARNT" cy:nodeId="82363">
    <graphics y="849.0504701569325" x="-72.59655439572066" z="0.0"/>
  </node>
  <node id="83555" label="SREBF2" cy:nodeId="82395">
    <graphics y="645.0543153717763" x="425.5087770251778" z="0.0"/>
  </node>
  <node id="83523" label="OIP5" cy:nodeId="82427">
    <graphics y="429.80282001044816" x="-77.91241132931441" z="0.0"/>
  </node>
  <node id="83491" label="POLDIP2" cy:nodeId="82459">
    <graphics y="64.84042529609269" x="217.7049802569893" z="0.0"/>
  </node>
  <node id="83714" label="HOXB1" cy:nodeId="82236">
    <graphics y="-1017.6457683608287" x="829.5941499499825" z="0.0"/>
  </node>
  <node id="83682" label="C1QBP" cy:nodeId="82268">
    <graphics y="419.17855243232316" x="-66.70580732540816" z="0.0"/>
  </node>
  <node id="83650" label="ABCC5" cy:nodeId="82300">
    <graphics y="-35.28766460869247" x="72.55758989138872" z="0.0"/>
  </node>
  <node id="83618" label="RUNX3" cy:nodeId="82332">
    <graphics y="-768.5662290618175" x="-288.4168974132988" z="0.0"/>
  </node>
  <node id="83586" label="TFAP2C" cy:nodeId="82364">
    <graphics y="-921.6532041594737" x="-327.82833540158003" z="0.0"/>
  </node>
  <node id="83554" label="MLX" cy:nodeId="82396">
    <graphics y="596.5497682526357" x="313.2788270740059" z="0.0"/>
  </node>
  <node id="83522" label="GABPA" cy:nodeId="82428">
    <graphics y="451.3718202545888" x="22.862628343537153" z="0.0"/>
  </node>
  <node id="83490" label="AUNIP" cy:nodeId="82460">
    <graphics y="424.7947023346669" x="193.54111802859575" z="0.0"/>
  </node>
  <node id="83713" label="TSPY6P" cy:nodeId="82237">
    <graphics y="-1115.3339902922862" x="651.8226350574043" z="0.0"/>
  </node>
  <node id="83681" label="C1orf162" cy:nodeId="82269">
    <graphics y="406.1921327545888" x="154.45608842654497" z="0.0"/>
  </node>
  <node id="83649" label="IQCG" cy:nodeId="82301">
    <graphics y="-874.3135435149425" x="-282.19320356564253" z="0.0"/>
  </node>
  <node id="83617" label="ELK1" cy:nodeId="82333">
    <graphics y="522.705377383495" x="441.997119310334" z="0.0"/>
  </node>
  <node id="83585" label="TFAP2A" cy:nodeId="82365">
    <graphics y="-983.5721494719737" x="-69.30709516720503" z="0.0"/>
  </node>
  <node id="83553" label="KLF5" cy:nodeId="82397">
    <graphics y="399.71151141669816" x="-300.6400419445488" z="0.0"/>
  </node>
  <node id="83521" label="H2AFY2" cy:nodeId="82429">
    <graphics y="817.8414857819325" x="84.44909990115434" z="0.0"/>
  </node>
  <node id="83489" label="UNC13D" cy:nodeId="82461">
    <graphics y="180.07770328071183" x="383.3674196033028" z="0.0"/>
  </node>
  <node id="83712" label="C11orf53" cy:nodeId="82238">
    <graphics y="-506.5376035735362" x="-378.8319364757988" z="0.0"/>
  </node>
  <node id="83680" label="SFTPB" cy:nodeId="82270">
    <graphics y="671.2072694733388" x="42.78174150271684" z="0.0"/>
  </node>
  <node id="83648" label="KIAA0319" cy:nodeId="82302">
    <graphics y="-573.9676572844737" x="-314.50484907345503" z="0.0"/>
  </node>
  <node id="83616" label="EGR2" cy:nodeId="82334">
    <graphics y="-911.2048399016612" x="-357.31991255001753" z="0.0"/>
  </node>
  <node id="83584" label="NFYC" cy:nodeId="82366">
    <graphics y="-1115.3339902922862" x="-227.5371671886894" z="0.0"/>
  </node>
  <node id="83552" label="ERF" cy:nodeId="82398">
    <graphics y="474.90328387763566" x="103.55901658816606" z="0.0"/>
  </node>
  <node id="83520" label="SLC39A8" cy:nodeId="82430">
    <graphics y="402.08272723701066" x="-41.471340772673784" z="0.0"/>
  </node>
  <node id="83488" label="PSMC5" cy:nodeId="82462">
    <graphics y="100.36310367133683" x="170.7267030505684" z="0.0"/>
  </node>
  <node id="83711" label="AKAP14" cy:nodeId="82239">
    <graphics y="-550.4812681243175" x="-509.1318632336113" z="0.0"/>
  </node>
  <node id="83679" label="C11orf82" cy:nodeId="82271">
    <graphics y="272.63213519599503" x="-141.61825239376753" z="0.0"/>
  </node>
  <node id="83647" label="AKR1C1" cy:nodeId="82303">
    <graphics y="-443.9442197844737" x="-16.777020093962847" z="0.0"/>
  </node>
  <node id="83615" label="GLIS2" cy:nodeId="82335">
    <graphics y="-710.6679746672862" x="-336.39571821408003" z="0.0"/>
  </node>
  <node id="83583" label="MYPOP" cy:nodeId="82367">
    <graphics y="640.8990724518544" x="137.564860704377" z="0.0"/>
  </node>
  <node id="83551" label="RAE1" cy:nodeId="82399">
    <graphics y="676.2667177155263" x="-91.65975630001753" z="0.0"/>
  </node>
  <node id="83519" label="DTD2" cy:nodeId="82431">
    <graphics y="717.8607728913075" x="-29.29418623165816" z="0.0"/>
  </node>
  <node id="83487" label="TRIP13" cy:nodeId="82463">
    <graphics y="429.9228456452138" x="253.1311334399727" z="0.0"/>
  </node>
</graph>
