# Supplementary material
Source: publisher figshare collection journal article supplement (https://springernature.figshare.com/ndownloader/files/35041376)

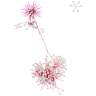

Supplement: Supplementary file 1 [file 35041376 › CytoscapeSession-2021_06_28-02_05/session_thumbnail.png]
